# Supplementary material for: Inhibition of miR-29 has a significant lipid-lowering benefit through suppression of lipogenic programs in liver
Source: PubMed Central journal article supplement (PMC4526858; doi:10.1038/srep12911), 2015-08-06
Supplement: srep12911-s1.pdf [file srep12911-s1.pdf]

Supplementary Figure S1

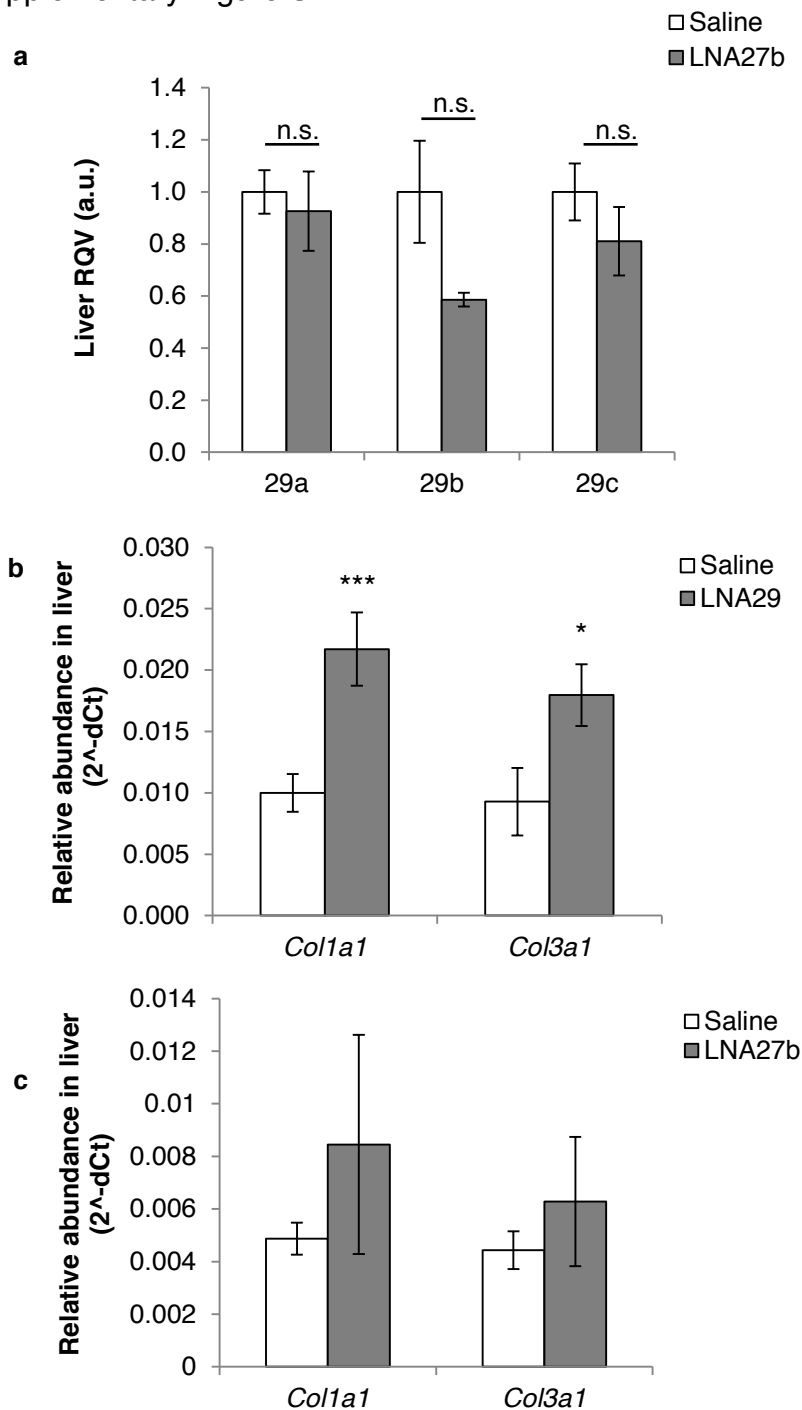

**Supplementary Figure S1.** (a) RT-qPCR analysis of LNA27b-treated (20 mg/kg) C57BL/6J female mice (n= 6) with saline-treated age-, gender-, and strain-matched controls (n=5) shows that endogenous expression of hepatic miR-29 is not significantly altered. (b) mRNA levels of *Col1a1* and *Col3a1*, validated miR-29 target genes, are significantly elevated in the liver of LNA29-treated mice. (c) mRNA levels of *Col1a1* and *Col3a1* are not significantly altered in the liver of LNA27b-treated mice. *U6* and *Rps9* were used as expression normalizers for miRNA and gene analysis, respectively. \*\*\*, p<0.005; \*, p<0.05; p-values were calculated by two-tailed unpaired Student's t-test. Error bars represent standard error of the mean.

# Supplementary Figure S2

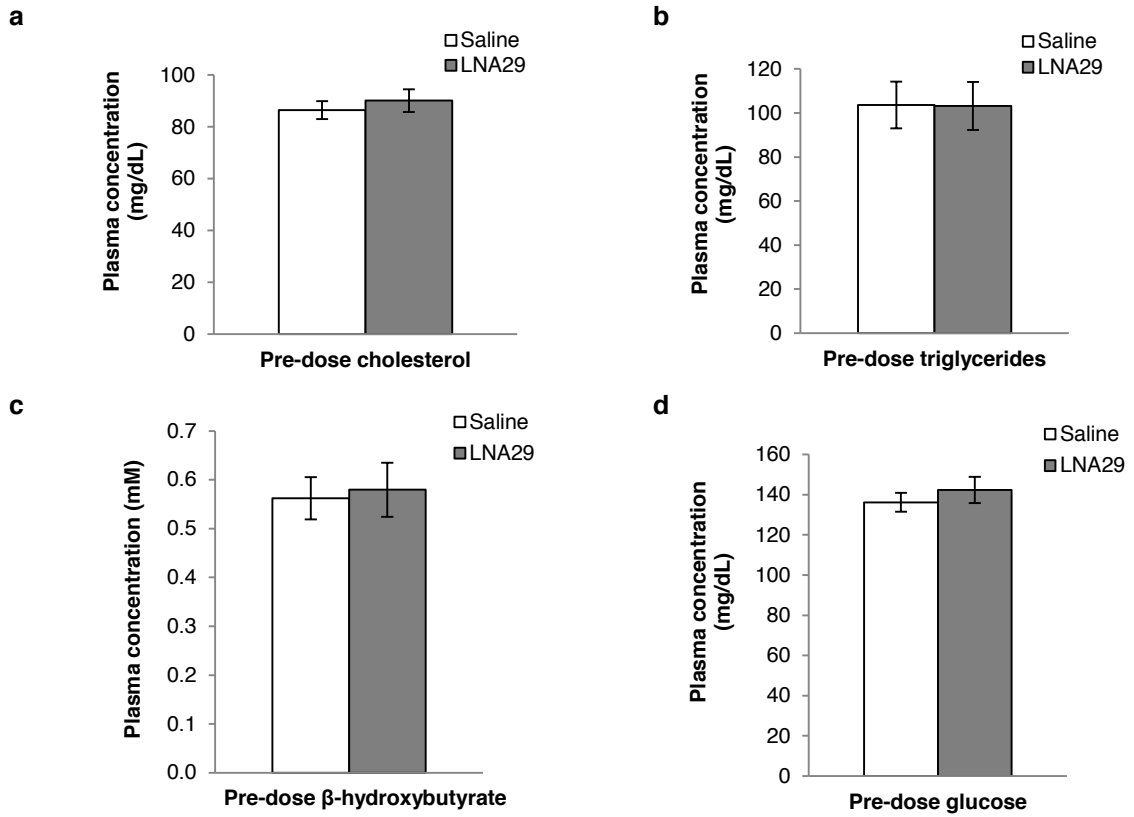

**Supplementary Figure S2.** Plasma was isolated from whole blood collected via submandibular bleed pre-treatment with either LNA29 (n=14) or saline (n=12) and was analyzed for levels of total cholesterol (a), triglycerides (b), glucose (c), and  $\beta$ -hydroxybutyrate (d).

Supplementary Figure S3

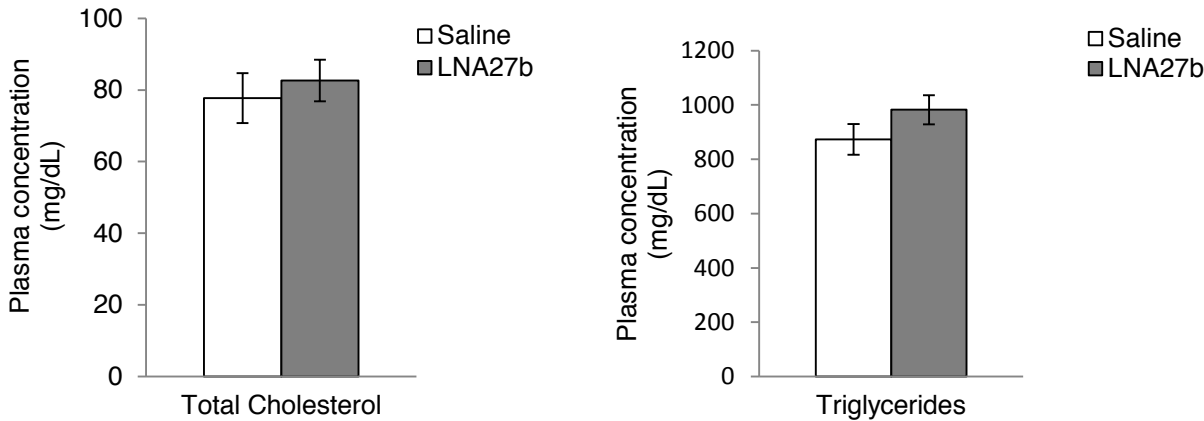

**Supplementary Figure S3.** Plasma was isolated from whole blood collected via submandibular bleed one week post-treatment with either LNA27b (n=5) or saline (n=6). Total cholesterol and triglycerides were not significantly altered in LNA-control treated mice.

Supplementary Figure S4

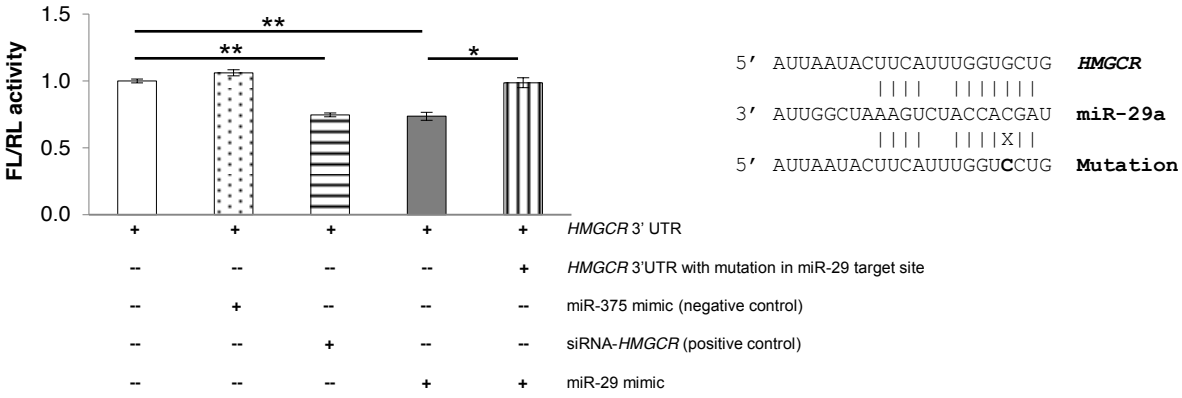

**Supplementary Figure S4.** Effects of miR-29a mimic (10 nM) in HEK293T cells on the activity of *Firefly* (FL) luciferase containing either wild-type or mutated *HMGCR* 3' UTR normalized to *Renilla* luciferase (RL) are shown. Each condition had six replicates. The mutation was targeted to the predicted miR-29 target site. \*, p<0.05; \*\*, p<0.01; p-values were calculated by two-tailed unpaired Student's t-test. Error bars represent standard error of the mean.



Supplementary Figure S5

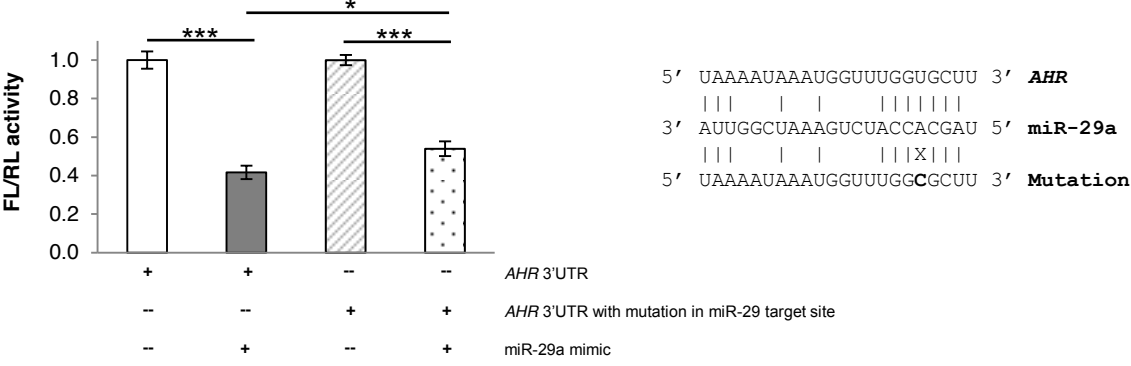

**Supplementary Figure S5.** Effects of miR-29a mimic (10 nM) in HEK293T cells on the activity of *Firefly* (FL) luciferase containing either wild-type or mutated *Ahr3'* UTR normalized to *Renilla* luciferase (RL) are shown. Each condition had six replicates. The mutation was targeted to the predicted miR-29 target site.

Supplementary Figure S6

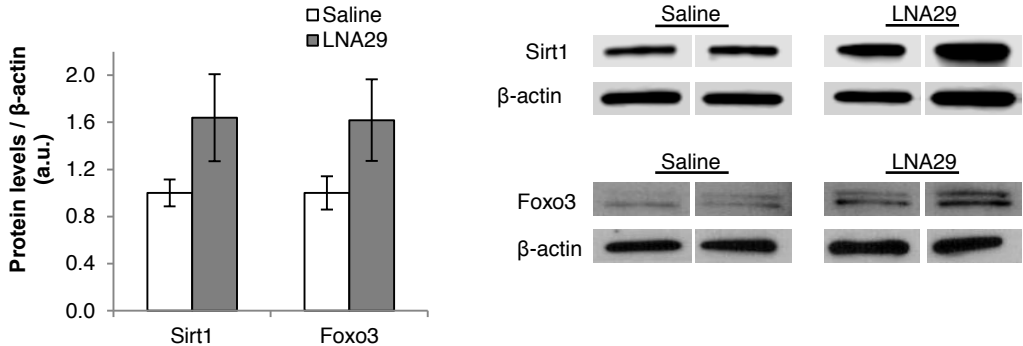

**Supplementary Figure S6.** Densitometry analyses shown for Sirt1 and Foxo3 in livers from LNA29-treated mice (n=5) compared to saline-treated controls (n=4).  $\beta$ -actin was used as a loading control. Immunoblot results are shown for two representative mice from each treatment group.

**Supplementary Table S1.** RNA-seq data from livers of LNA29-treated mice compared to saline-treated controls. mRNA fold-change was computed before and after discarding data points  $\pm 1.5$  times the standard deviation of the mean within each treatment category and p-values were calculated by one-tailed unpaired Student's t-test. (GEO accession number GSE63493).

**Supplementary Table S2.** Results of gene ontology (GO) term enrichment analysis using NIH David for down-regulated genes.

**Supplementary Table S3.** Results of GO term enrichment analysis using Ingenuity Pathway Analysis (IPA) for down-regulated genes.

**Supplementary Table S4.** Results of GO term enrichment analysis using NIH David for up-regulated genes.

**Supplementary Table S5.** Results of GO term enrichment analysis using IPA for up-regulated genes.

Supplemental Table S1.

| Gene                   | <i>All data points included</i> |             | <i>Data points beyond 1.5*stdev discarded</i> |             |
|------------------------|---------------------------------|-------------|-----------------------------------------------|-------------|
|                        | FC (LNA)                        | P-value     | FC (LNA)                                      | P-value     |
| Ugt1a7c 394432         | 53.67886667                     | 0.170446566 | 1                                             | #DIV/0!     |
| Mfrp 259172            | 30.9618                         | 0.027620748 | 30.9618                                       | 0.027620748 |
| Plin1 103968           | 25.99056667                     | 0.170446566 | 1                                             | #DIV/0!     |
| LOC100302626 100302626 | 15.58051667                     | 0.000647286 | 18.49662                                      | 1.44412E-06 |
| Nrg1 211323            | 14.99348333                     | 0.071828993 | 6.67142                                       | 0.056347996 |
| Tff3 21786             | 14.55460109                     | 0.097047679 | 9.159665022                                   | 0.086529212 |
| Foxs1 14239            | 14.22866035                     | 0.091083935 | 12.78472                                      | 0.003006972 |
| Dsel 319901            | 13.96525                        | 0.020563149 | 9.21114                                       | 0.013839142 |
| Raet1a 19368           | 13.91424387                     | 0.072428782 | 17.48572668                                   | 0.103075306 |
| Zmynd12 332934         | 13.36296667                     | 0.083414785 | 6.27946                                       | 0.148332518 |
| Tagln3 56370           | 12.93766667                     | 0.042712222 | 7.97804                                       | 0.066062971 |
| Kirrel3 67703          | 12.77526667                     | 0.10627979  | 4.37142                                       | 0.148332518 |
| Igf2bp3 140488         | 12.21705                        | 0.045223458 | 7.1133                                        | 0.055477299 |
| Anln 68743             | 12.10743333                     | 0.027701966 | 12.10743333                                   | 0.027701966 |
| Serpina3b 271047       | 11.9414                         | 0.09872422  | 4.57358                                       | 0.148332518 |
| Slc7a14 241919         | 11.77293333                     | 0.101207638 | 4.37142                                       | 0.148332518 |
| Doc2b 13447            | 11.74098333                     | 0.008946182 | 11.74098333                                   | 0.008946182 |
| Tnf 21926              | 11.35551667                     | 0.028231707 | 11.35551667                                   | 0.028231707 |
| Styx1 76571            | 11.18705                        | 0.028845884 | 11.18705                                      | 0.028845884 |
| Ncaph 215387           | 10.8206                         | 0.006501621 | 10.8206                                       | 0.006501621 |
| 4921523A10Rik 110332   | 10.68586667                     | 0.0267355   | 10.68586667                                   | 0.0267355   |
| Zfp786 330301          | 10.66063333                     | 0.091443403 | 4.57358                                       | 0.148332518 |
| Megf6 230971           | 10.27116085                     | 0.068154138 | 12.15304                                      | 0.030717181 |
| Ybx2 53422             | 10.2673                         | 0.170446566 | 1                                             | #DIV/0!     |
| S100a4 20198           | 10.2673                         | 0.170446566 | 1                                             | #DIV/0!     |
| Klrc1 16641            | 10.2673                         | 0.170446566 | 1                                             | #DIV/0!     |
| Dpysl5 65254           | 10.2673                         | 0.170446566 | 1                                             | #DIV/0!     |
| Sftpd 20390            | 10.10061667                     | 0.08801451  | 4.57358                                       | 0.148332518 |
| Flrt2 399558           | 10.09441667                     | 0.030807342 | 10.09441667                                   | 0.030807342 |
| Gm9079 668272          | 10.09441667                     | 0.030807342 | 10.09441667                                   | 0.030807342 |
| Galnt9 231605          | 9.992783333                     | 0.030268937 | 9.992783333                                   | 0.030268937 |
| Col8a2 329941          | 9.7637                          | 0.085905471 | 4.57358                                       | 0.148332518 |
| Trim17 56631           | 9.638366667                     | 0.170446566 | 1                                             | #DIV/0!     |
| Adra2a 11551           | 9.396590242                     | 0.023044665 | 9.535655785                                   | 0.006330263 |
| Grik4 110637           | 9.297916667                     | 0.072956608 | 9.297916667                                   | 0.072956608 |
| Gm10818 675921         | 9.0393                          | 0.106322683 | 3.3                                           | 0.148332518 |
| Mmp3 17392             | 9.0393                          | 0.106322683 | 3.3                                           | 0.148332518 |
| Tex19.1 73679          | 8.963416667                     | 0.170446566 | 1                                             | #DIV/0!     |
| Sh2d1a 20400           | 8.898366667                     | 0.072486194 | 8.898366667                                   | 0.072486194 |
| Wdr65 68625            | 8.879098973                     | 0.089653732 | 11.05418                                      | 0.127242563 |
| 4930583K01Rik 67745    | 8.872633333                     | 0.028103571 | 8.872633333                                   | 0.028103571 |
| Ccr2 12772             | 8.872633333                     | 0.028103571 | 8.872633333                                   | 0.028103571 |
| E030003E18Rik 320092   | 8.872633333                     | 0.028103571 | 8.872633333                                   | 0.028103571 |
| Fxyd7 57780            | 8.792424343                     | 0.065568512 | 11.92074                                      | 0.087106547 |
| Eme1 268465            | 8.742005732                     | 0.014355636 | 28.56858333                                   | 0.014727512 |
| Omp 18378              | 8.704166667                     | 0.027773343 | 8.704166667                                   | 0.027773343 |
| Hoxb8 15416            | 8.704166667                     | 0.027773343 | 8.704166667                                   | 0.027773343 |
| Fzd3 14365             | 8.377533333                     | 0.077428357 | 4.57358                                       | 0.148332518 |
| Rnu1b2 19845           | 8.377533333                     | 0.077428357 | 4.57358                                       | 0.148332518 |

|                      |             |             |             |             |
|----------------------|-------------|-------------|-------------|-------------|
| C4bp-ps1 12270       | 8.377533333 | 0.077428357 | 4.57358     | 0.148332518 |
| Ptprn 19275          | 8.377533333 | 0.077428357 | 4.57358     | 0.148332518 |
| Nsun7 70918          | 8.377533333 | 0.077428357 | 4.57358     | 0.148332518 |
| Chst8 68947          | 8.377533333 | 0.077428357 | 4.57358     | 0.148332518 |
| Ugt2b38 100559       | 8.371583333 | 0.087989736 | 3.8959      | 0.148332518 |
| AB099516 554292      | 8.02055     | 0.074868905 | 4.64906     | 0.148332518 |
| Snhg10 69434         | 7.977983333 | 0.075346019 | 4.57358     | 0.148332518 |
| Sebox 18292          | 7.977983333 | 0.075346019 | 4.57358     | 0.148332518 |
| Serp2 72661          | 7.87635     | 0.074873498 | 4.57358     | 0.148332518 |
| Nanos1 332397        | 7.87635     | 0.074873498 | 4.57358     | 0.148332518 |
| Bai2 230775          | 7.87635     | 0.074873498 | 4.57358     | 0.148332518 |
| Galnt3 14425         | 7.87635     | 0.074873498 | 4.57358     | 0.148332518 |
| Glt8d2 74782         | 7.87635     | 0.074873498 | 4.57358     | 0.148332518 |
| Fsd2 244091          | 7.707883333 | 0.075998742 | 4.37142     | 0.148332518 |
| Actl6b 83766         | 7.707883333 | 0.075998742 | 4.37142     | 0.148332518 |
| Gpr179 217143        | 7.707883333 | 0.075998742 | 4.37142     | 0.148332518 |
| Muc19 239611         | 7.707883333 | 0.075998742 | 4.37142     | 0.148332518 |
| Tm4sf5 75604         | 7.707883333 | 0.075998742 | 4.37142     | 0.148332518 |
| Gm17801 100272221    | 7.707883333 | 0.075998742 | 4.37142     | 0.148332518 |
| Acot10 64833         | 7.68265     | 0.170446566 | 1           | #DIV/0!     |
| B3gat2 280645        | 7.68265     | 0.170446566 | 1           | #DIV/0!     |
| Cib3 234421          | 7.392247626 | 0.12124896  | 2.344248986 | 0.127168618 |
| Raet1c 19370         | 7.391479404 | 0.094757776 | 6.37142     | 0.173296754 |
| Cyp4a12a 277753      | 7.34014496  | 0.013267484 | 12.27266475 | 0.015996756 |
| Ngp 18054            | 7.219879478 | 0.047297884 | 10.48472    | 0.021914722 |
| 1700018A04Rik 71307  | 7.122633333 | 0.170446566 | 1           | #DIV/0!     |
| 4930444G20Rik 114671 | 7.122633333 | 0.170446566 | 1           | #DIV/0!     |
| Eomes 13813          | 7.122633333 | 0.170446566 | 1           | #DIV/0!     |
| Ush1c 72088          | 7.122633333 | 0.170446566 | 1           | #DIV/0!     |
| Gpr20 239530         | 7.122633333 | 0.170446566 | 1           | #DIV/0!     |
| Aplnr 23796          | 7.122633333 | 0.170446566 | 1           | #DIV/0!     |
| Spert 67926          | 7.122633333 | 0.170446566 | 1           | #DIV/0!     |
| Stag3 50878          | 7.122633333 | 0.170446566 | 1           | #DIV/0!     |
| Rimklb 108653        | 7.122633333 | 0.170446566 | 1           | #DIV/0!     |
| Il22ra2 237310       | 7.122633333 | 0.170446566 | 1           | #DIV/0!     |
| Nbea 26422           | 7.116433333 | 0.084914106 | 3.53972     | 0.148332518 |
| A730069N07Rik 244425 | 6.955966667 | 0.072463803 | 6.955966667 | 0.072463803 |
| Gpr171 229323        | 6.955966667 | 0.072463803 | 6.955966667 | 0.072463803 |
| Mrgprf 211577        | 6.955966667 | 0.072463803 | 6.955966667 | 0.072463803 |
| Sdk1 330222          | 6.955966667 | 0.072463803 | 6.955966667 | 0.072463803 |
| Kif20a 19348         | 6.842012658 | 0.062528462 | 10.3        | 0.072944813 |
| Gm2506 100039939     | 6.839616667 | 0.170446566 | 1           | #DIV/0!     |
| Mogat2 233549        | 6.815033333 | 0.087605735 | 3.3         | 0.148332518 |
| Aldh1a2 19378        | 6.815033333 | 0.087605735 | 3.3         | 0.148332518 |
| A930007I19Rik 77779  | 6.815033333 | 0.087605735 | 3.3         | 0.148332518 |
| Olfr1396 258334      | 6.815033333 | 0.087605735 | 3.3         | 0.148332518 |
| 1700029J07Rik 69479  | 6.815033333 | 0.087605735 | 3.3         | 0.148332518 |
| Trim10 19824         | 6.7875      | 0.072578363 | 6.7875      | 0.072578363 |
| Capn9 73647          | 6.7875      | 0.072578363 | 6.7875      | 0.072578363 |
| Tspan32 27027        | 6.7875      | 0.072578363 | 6.7875      | 0.072578363 |
| Efs 13644            | 6.7875      | 0.072578363 | 6.7875      | 0.072578363 |
| Bex2 12069           | 6.7875      | 0.072578363 | 6.7875      | 0.072578363 |
| Bdkrb1 12061         | 6.7875      | 0.072578363 | 6.7875      | 0.072578363 |

|                      |             |             |              |             |
|----------------------|-------------|-------------|--------------|-------------|
| Cox8b 12869          | 6.7875      | 0.072578363 | 6.7875       | 0.072578363 |
| Faim2 72393          | 6.7875      | 0.072578363 | 6.7875       | 0.072578363 |
| Cenpp 66336          | 6.7875      | 0.072578363 | 6.7875       | 0.072578363 |
| Cyp26c1 546726       | 6.7875      | 0.072578363 | 6.7875       | 0.072578363 |
| Akr1c18 105349       | 6.7875      | 0.072578363 | 6.7875       | 0.072578363 |
| Ccdc40 207607        | 6.7875      | 0.072578363 | 6.7875       | 0.072578363 |
| Sdcbp2 228765        | 6.785716667 | 0.170446566 | 1            | #DIV/0!     |
| Glipr1 73690         | 6.69678659  | 0.028417486 | 14.42104     | 0.023999739 |
| Corin 53419          | 6.597876    | 0.000495812 | 27.49115     | 9.70684E-05 |
| Pcdhga5 93713        | 6.52515     | 0.170446566 | 1            | #DIV/0!     |
| Klk1 16612           | 6.512125025 | 0.100764034 | 8.34716      | 0.173296754 |
| Nfe2l3 18025         | 6.293632083 | 0.155787665 | 3.53972      | 0.173296754 |
| H19 14955            | 6.235444534 | 0.148156953 | 1.505047411  | 0.16546411  |
| Hist1h4f 319157      | 6.17925     | 0.170446566 | 1            | #DIV/0!     |
| Lamp3 239739         | 6.163947924 | 0.003140126 | 7.346325602  | 7.66539E-05 |
| Greb1l 381157        | 6.12896     | 0.058687724 | 15.3224      | 0.055497328 |
| Slc22a21 56517       | 6.106583333 | 0.074926697 | 3.64932      | 0.148332518 |
| D630023F18Rik 98303  | 6.094416667 | 0.076298115 | 3.53972      | 0.148332518 |
| Tmem130 243339       | 6.094416667 | 0.076298115 | 3.53972      | 0.148332518 |
| Slc28a3 114304       | 6.094416667 | 0.076298115 | 3.53972      | 0.148332518 |
| Mpp4 227157          | 6.094416667 | 0.076298115 | 3.53972      | 0.148332518 |
| Fam101a 73121        | 6.094416667 | 0.076298115 | 3.53972      | 0.148332518 |
| Fam163a 329274       | 6.094416667 | 0.076298115 | 3.53972      | 0.148332518 |
| Liph 239759          | 6.094416667 | 0.076298115 | 3.53972      | 0.148332518 |
| Xlr 22441            | 6.094416667 | 0.076298115 | 3.53972      | 0.148332518 |
| D2Erted750e 51944    | 6.087967684 | 0.058974011 | 15.3224      | 0.055497328 |
| Zfp947 210853        | 6.009913333 | 0.058714121 | 15.02478333  | 0.054984817 |
| Slc24a1 214111       | 5.92595     | 0.075125027 | 3.53972      | 0.148332518 |
| Lif 16878            | 5.92595     | 0.075125027 | 3.53972      | 0.148332518 |
| Tead4 21679          | 5.92595     | 0.075125027 | 3.53972      | 0.148332518 |
| Fndc7 320181         | 5.92595     | 0.075125027 | 3.53972      | 0.148332518 |
| Dlx4 13394           | 5.89465     | 0.078731019 | 3.3          | 0.148332518 |
| Spink3 20730         | 5.89465     | 0.078731019 | 3.3          | 0.148332518 |
| A830093I24Rik 207921 | 5.89465     | 0.078731019 | 3.3          | 0.148332518 |
| C2cd4c 237397        | 5.89465     | 0.078731019 | 3.3          | 0.148332518 |
| Mkrn3 22652          | 5.89465     | 0.078731019 | 3.3          | 0.148332518 |
| Serpina3a 74069      | 5.89465     | 0.078731019 | 3.3          | 0.148332518 |
| Mtnr1a 17773         | 5.89465     | 0.078731019 | 3.3          | 0.148332518 |
| Hsd17b14 66065       | 5.89465     | 0.078731019 | 3.3          | 0.148332518 |
| Gm6792 627821        | 5.89465     | 0.078731019 | 3.3          | 0.148332518 |
| Il17d 239114         | 5.89465     | 0.078731019 | 3.3          | 0.148332518 |
| Tgm4 331046          | 5.792683333 | 0.170446566 | 1            | #DIV/0!     |
| Pf4 56744            | 5.749159429 | 0.012325171 | 11.30235658  | 0.001592239 |
| Tmem169 271711       | 5.726183333 | 0.077237977 | 3.3          | 0.148332518 |
| 1700007K13Rik 69327  | 5.726183333 | 0.077237977 | 3.3          | 0.148332518 |
| Lctl 235435          | 5.726183333 | 0.077237977 | 3.3          | 0.148332518 |
| Foxd3 15221          | 5.726183333 | 0.077237977 | 3.3          | 0.148332518 |
| Map3k12 26404        | 5.566265559 | 0.200525554 | -1.071949243 | 0.45778063  |
| Gm1673 381633        | 5.469366267 | 0.01476794  | 13.76548333  | 0.01085985  |
| Prrx1 18933          | 5.39955     | 0.170446566 | 1            | #DIV/0!     |
| Dpp6 13483           | 5.39955     | 0.170446566 | 1            | #DIV/0!     |
| Accn3 171209         | 5.39955     | 0.170446566 | 1            | #DIV/0!     |
| Clec4d 17474         | 5.39955     | 0.170446566 | 1            | #DIV/0!     |

|                      |             |             |             |             |
|----------------------|-------------|-------------|-------------|-------------|
| 2810442I21Rik 72735  | 5.39955     | 0.170446566 | 1           | #DIV/0!     |
| Cd209d 170779        | 5.39955     | 0.170446566 | 1           | #DIV/0!     |
| Mmp12 17381          | 5.39955     | 0.170446566 | 1           | #DIV/0!     |
| Treh 58866           | 5.381069757 | 0.003234598 | 7.552823245 | 0.003997473 |
| 2310014L17Rik 381845 | 5.36478     | 0.201621969 | 1           | #DIV/0!     |
| Gm9897 208595        | 5.272103825 | 0.029153005 | 16.07991667 | 0.020760156 |
| Gzma 14938           | 5.257386269 | 0.049053165 | 5.8273      | 0.045625723 |
| Hey1 15213           | 5.222452    | 0.023625904 | 16.35616    | 0.013181761 |
| Gm7030 630294        | 5.2044      | 0.170446566 | 1           | #DIV/0!     |
| Fez1 235180          | 5.0331      | 0.072795349 | 5.0331      | 0.072795349 |
| Spire2 234857        | 5.0331      | 0.072795349 | 5.0331      | 0.072795349 |
| Hsd3b5 15496         | 5.0331      | 0.072795349 | 5.0331      | 0.072795349 |
| Gm17769 100045653    | 5.0331      | 0.072795349 | 5.0331      | 0.072795349 |
| Klrd1 16643          | 5.0331      | 0.072795349 | 5.0331      | 0.072795349 |
| Jph4 319984          | 5           | 0.170446566 | 1           | #DIV/0!     |
| Slc27a6 225579       | 5           | 0.170446566 | 1           | #DIV/0!     |
| 1190002H23Rik 66214  | 5           | 0.170446566 | 1           | #DIV/0!     |
| Papalb 56522         | 5           | 0.170446566 | 1           | #DIV/0!     |
| Svep1 64817          | 4.951013333 | 0.049326105 | 12.37753333 | 0.039912242 |
| Acot5 217698         | 4.939016667 | 0.170446566 | 1           | #DIV/0!     |
| Rin1 225870          | 4.923903572 | 0.006144895 | 5.858893822 | 0.000386475 |
| Pigz 239827          | 4.922209688 | 0.133864225 | 4.57358     | 0.173296754 |
| Loxhd1 240411        | 4.898366667 | 0.170446566 | 1           | #DIV/0!     |
| Sh3rf3 237353        | 4.898366667 | 0.170446566 | 1           | #DIV/0!     |
| F2rl2 14064          | 4.898366667 | 0.170446566 | 1           | #DIV/0!     |
| H2afy3 67552         | 4.898366667 | 0.170446566 | 1           | #DIV/0!     |
| Fscn2 238021         | 4.898366667 | 0.170446566 | 1           | #DIV/0!     |
| Prps1l1 75456        | 4.898366667 | 0.170446566 | 1           | #DIV/0!     |
| Ccl8 20307           | 4.898366667 | 0.170446566 | 1           | #DIV/0!     |
| Twist2 13345         | 4.898366667 | 0.170446566 | 1           | #DIV/0!     |
| Hormad2 75828        | 4.898366667 | 0.170446566 | 1           | #DIV/0!     |
| Snora78 100306952    | 4.898366667 | 0.170446566 | 1           | #DIV/0!     |
| Adra1d 11550         | 4.898366667 | 0.170446566 | 1           | #DIV/0!     |
| Aldoart2 79459       | 4.898366667 | 0.170446566 | 1           | #DIV/0!     |
| Oprd1 18386          | 4.898366667 | 0.170446566 | 1           | #DIV/0!     |
| Gngt1 14699          | 4.898366667 | 0.170446566 | 1           | #DIV/0!     |
| Myh4 17884           | 4.898366667 | 0.170446566 | 1           | #DIV/0!     |
| Tectb 21684          | 4.898366667 | 0.170446566 | 1           | #DIV/0!     |
| Epb4.2 13828         | 4.898366667 | 0.170446566 | 1           | #DIV/0!     |
| Sgol1 72415          | 4.898366667 | 0.170446566 | 1           | #DIV/0!     |
| 1700009J07Rik 75188  | 4.898366667 | 0.170446566 | 1           | #DIV/0!     |
| Akap14 434756        | 4.898366667 | 0.170446566 | 1           | #DIV/0!     |
| Pcdh9 211712         | 4.898366667 | 0.170446566 | 1           | #DIV/0!     |
| Cttnbp2 30785        | 4.898366667 | 0.170446566 | 1           | #DIV/0!     |
| Klhl1 93688          | 4.898366667 | 0.170446566 | 1           | #DIV/0!     |
| Piwi12 57746         | 4.898366667 | 0.170446566 | 1           | #DIV/0!     |
| Cyp2t4 384724        | 4.898366667 | 0.170446566 | 1           | #DIV/0!     |
| Ephx3 71932          | 4.88682     | 0.073222368 | 7.1133      | 0.074643367 |
| Gzmm 16904           | 4.848751515 | 0.055770721 | 10.245      | 0.023173348 |
| Fam181b 58238        | 4.799191799 | 0.016375419 | 14.09134    | 0.004938992 |
| Krt79 223917         | 4.630125042 | 0.022827453 | 16.10743333 | 0.011030825 |
| Rfc4 106344          | 4.627851966 | 0.020671872 | 8.291153225 | 0.017580808 |
| Gm6498 624367        | 4.545254967 | 0.062086415 | 11.21458333 | 0.048853    |

|                      |             |             |             |             |
|----------------------|-------------|-------------|-------------|-------------|
| Arg2 11847           | 4.533372963 | 0.110976772 | 6.27946     | 0.173296754 |
| Trps1 83925          | 4.451892337 | 0.023099972 | 4.451892337 | 0.023099972 |
| Tyms-ps 22172        | 4.440437993 | 0.052949489 | 10.95596667 | 0.039448802 |
| Palb2 233826         | 4.43194     | 0.153278681 | 3.53972     | 0.173296754 |
| 5730508B09Rik 70617  | 4.409484397 | 0.001711719 | 7.445940054 | 5.11865E-05 |
| 3930402G23Rik 665306 | 4.349974098 | 0.004134554 | 5.032002078 | 0.000556693 |
| Serpina1e 20704      | 4.322861762 | 0.006285895 | 6.071916227 | 0.0064432   |
| Erp27 69187          | 4.320739805 | 0.131503083 | 4.57358     | 0.173296754 |
| Dnajc27 217378       | 4.315       | 0.055263978 | 10.7875     | 0.040042786 |
| Rgs9bp 243923        | 4.312694524 | 0.054309398 | 10.85433333 | 0.039010666 |
| Egfl8 81701          | 4.278790239 | 0.034525897 | 2.924157316 | 0.038263133 |
| Mcoln2 68279         | 4.274346667 | 0.055187707 | 10.68586667 | 0.03955673  |
| Serinc4 574418       | 4.261       | 0.170446566 | 1           | #DIV/0!     |
| Ptpla 30963          | 4.232574918 | 0.00039297  | 4.232574918 | 0.00039297  |
| Tcea2 21400          | 4.217514552 | 0.065876108 | 2.788711944 | 0.129359652 |
| Adam12 11489         | 4.20981702  | 0.030482292 | 4.20981702  | 0.030482292 |
| Trpv4 63873          | 4.178378587 | 0.005437271 | 4.998059572 | 0.000103973 |
| Card14 170720        | 4.1369      | 0.170446566 | 1           | #DIV/0!     |
| Eml5 319670          | 4.044816117 | 0.095580829 | 2.103182796 | 0.165860767 |
| Gdf9 14566           | 4.041389572 | 0.103883388 | 9.04946     | 0.074324407 |
| Gm10451 100041694    | 4.041238873 | 0.1140852   | 3.716963336 | 0.153115295 |
| Apol7c 108956        | 4.040883333 | 0.170446566 | 1           | #DIV/0!     |
| Fam46b 100342        | 4.040246667 | 0.13217465  | 4.57358     | 0.173296754 |
| Hist2h3b 319154      | 4.022016667 | 0.074325894 | 2.6         | 0.148332518 |
| Sult2a4 434121       | 4.009433333 | 0.170446566 | 1           | #DIV/0!     |
| Hbq1b 544763         | 3.977983333 | 0.170446566 | 1           | #DIV/0!     |
| BC066135 271887      | 3.977983333 | 0.170446566 | 1           | #DIV/0!     |
| Kctd19 279499        | 3.977983333 | 0.170446566 | 1           | #DIV/0!     |
| Snora70 104368       | 3.977983333 | 0.170446566 | 1           | #DIV/0!     |
| Tnfaip6 21930        | 3.977983333 | 0.170446566 | 1           | #DIV/0!     |
| Serpib10-ps 241197   | 3.977983333 | 0.170446566 | 1           | #DIV/0!     |
| Kif6 319991          | 3.977983333 | 0.170446566 | 1           | #DIV/0!     |
| BC055004 381680      | 3.977983333 | 0.170446566 | 1           | #DIV/0!     |
| Sdk2 237979          | 3.977983333 | 0.170446566 | 1           | #DIV/0!     |
| Plxb3 140571         | 3.977983333 | 0.170446566 | 1           | #DIV/0!     |
| 1700008O03Rik 69349  | 3.977983333 | 0.170446566 | 1           | #DIV/0!     |
| Qrich2 217341        | 3.977983333 | 0.170446566 | 1           | #DIV/0!     |
| Dppa3 73708          | 3.977983333 | 0.170446566 | 1           | #DIV/0!     |
| Btnl2 547431         | 3.977983333 | 0.170446566 | 1           | #DIV/0!     |
| Gcnt7 654821         | 3.977983333 | 0.170446566 | 1           | #DIV/0!     |
| Klra7 16638          | 3.977983333 | 0.170446566 | 1           | #DIV/0!     |
| B4galnt2 14422       | 3.977983333 | 0.170446566 | 1           | #DIV/0!     |
| Olfr315 258531       | 3.977983333 | 0.170446566 | 1           | #DIV/0!     |
| Sectm1b 58210        | 3.977983333 | 0.170446566 | 1           | #DIV/0!     |
| Smok2b 236574        | 3.977983333 | 0.170446566 | 1           | #DIV/0!     |
| Sim1 20464           | 3.977983333 | 0.170446566 | 1           | #DIV/0!     |
| Catsper3 76856       | 3.977983333 | 0.170446566 | 1           | #DIV/0!     |
| Gm11567 670533       | 3.977983333 | 0.170446566 | 1           | #DIV/0!     |
| Fam71d 70897         | 3.977983333 | 0.170446566 | 1           | #DIV/0!     |
| Mctp1 78771          | 3.977983333 | 0.170446566 | 1           | #DIV/0!     |
| Ube2t 67196          | 3.977983333 | 0.170446566 | 1           | #DIV/0!     |
| Olfr61 18362         | 3.977983333 | 0.170446566 | 1           | #DIV/0!     |
| Ccdc85a 216613       | 3.977983333 | 0.170446566 | 1           | #DIV/0!     |



|                        |             |             |   |         |
|------------------------|-------------|-------------|---|---------|
| Zfp957 105590          | 3.977983333 | 0.170446566 | 1 | #DIV/0! |
| Lrp8 16975             | 3.977983333 | 0.170446566 | 1 | #DIV/0! |
| Gpr152 269053          | 3.977983333 | 0.170446566 | 1 | #DIV/0! |
| Ydjc 69101             | 3.977983333 | 0.170446566 | 1 | #DIV/0! |
| Zfp133-ps 668917       | 3.977983333 | 0.170446566 | 1 | #DIV/0! |
| Gsdma 57911            | 3.977983333 | 0.170446566 | 1 | #DIV/0! |
| Oifr982 258853         | 3.977983333 | 0.170446566 | 1 | #DIV/0! |
| Gm5089 328479          | 3.977983333 | 0.170446566 | 1 | #DIV/0! |
| Tslp 53603             | 3.977983333 | 0.170446566 | 1 | #DIV/0! |
| 4933402N03Rik 233918   | 3.977983333 | 0.170446566 | 1 | #DIV/0! |
| Grik3 14807            | 3.977983333 | 0.170446566 | 1 | #DIV/0! |
| Wnt7a 22421            | 3.977983333 | 0.170446566 | 1 | #DIV/0! |
| LOC100499420 100499420 | 3.977983333 | 0.170446566 | 1 | #DIV/0! |
| Frm5 228564            | 3.977983333 | 0.170446566 | 1 | #DIV/0! |
| Pgr 18667              | 3.977983333 | 0.170446566 | 1 | #DIV/0! |
| Il1rl2 107527          | 3.977983333 | 0.170446566 | 1 | #DIV/0! |
| Cxcl5 20311            | 3.977983333 | 0.170446566 | 1 | #DIV/0! |
| Gad2 14417             | 3.977983333 | 0.170446566 | 1 | #DIV/0! |
| Cr2 12902              | 3.977983333 | 0.170446566 | 1 | #DIV/0! |
| Unc80 329178           | 3.977983333 | 0.170446566 | 1 | #DIV/0! |
| Slc44a5 242259         | 3.977983333 | 0.170446566 | 1 | #DIV/0! |
| Atp8a2 50769           | 3.977983333 | 0.170446566 | 1 | #DIV/0! |
| BC048609 433215        | 3.977983333 | 0.170446566 | 1 | #DIV/0! |
| Ppp1r1a 58200          | 3.977983333 | 0.170446566 | 1 | #DIV/0! |
| Tnip3 414084           | 3.977983333 | 0.170446566 | 1 | #DIV/0! |
| Pcdh10 18526           | 3.977983333 | 0.170446566 | 1 | #DIV/0! |
| Gm4984 245347          | 3.977983333 | 0.170446566 | 1 | #DIV/0! |
| 9530059O14Rik 319626   | 3.977983333 | 0.170446566 | 1 | #DIV/0! |
| Dmrtc1b 632708         | 3.977983333 | 0.170446566 | 1 | #DIV/0! |
| BC061212 381724        | 3.977983333 | 0.170446566 | 1 | #DIV/0! |
| 1700001O22Rik 73598    | 3.977983333 | 0.170446566 | 1 | #DIV/0! |
| Kcna7 16495            | 3.977983333 | 0.170446566 | 1 | #DIV/0! |
| Gpr37l1 171469         | 3.977983333 | 0.170446566 | 1 | #DIV/0! |
| Sostdc1 66042          | 3.977983333 | 0.170446566 | 1 | #DIV/0! |
| Slc1a3 20512           | 3.977983333 | 0.170446566 | 1 | #DIV/0! |
| Dnajb7 57755           | 3.977983333 | 0.170446566 | 1 | #DIV/0! |
| Usp13 72607            | 3.977983333 | 0.170446566 | 1 | #DIV/0! |
| Ppp1r42 69312          | 3.977983333 | 0.170446566 | 1 | #DIV/0! |
| 4930567H17Rik 619303   | 3.977983333 | 0.170446566 | 1 | #DIV/0! |
| Cldn27 546519          | 3.977983333 | 0.170446566 | 1 | #DIV/0! |
| Cmya5 76469            | 3.977983333 | 0.170446566 | 1 | #DIV/0! |
| Gm15645 626055         | 3.977983333 | 0.170446566 | 1 | #DIV/0! |
| Fancb 237211           | 3.977983333 | 0.170446566 | 1 | #DIV/0! |
| 9530077C05Rik 68283    | 3.977983333 | 0.170446566 | 1 | #DIV/0! |
| Efhb 211482            | 3.977983333 | 0.170446566 | 1 | #DIV/0! |
| D830046C22Rik 320197   | 3.977983333 | 0.170446566 | 1 | #DIV/0! |
| Tbx10 109575           | 3.977983333 | 0.170446566 | 1 | #DIV/0! |
| Timp4 110595           | 3.977983333 | 0.170446566 | 1 | #DIV/0! |
| Fhl2 14200             | 3.977983333 | 0.170446566 | 1 | #DIV/0! |
| Gpr119 236781          | 3.977983333 | 0.170446566 | 1 | #DIV/0! |
| Vmn1r4 171194          | 3.977983333 | 0.170446566 | 1 | #DIV/0! |
| Ifitd1 74071           | 3.977983333 | 0.170446566 | 1 | #DIV/0! |
| Siah3 380918           | 3.977983333 | 0.170446566 | 1 | #DIV/0! |

|                      |             |             |   |         |
|----------------------|-------------|-------------|---|---------|
| Sfhl1 194219         | 3.977983333 | 0.170446566 | 1 | #DIV/0! |
| Tmem89 69384         | 3.977983333 | 0.170446566 | 1 | #DIV/0! |
| Lrrtm4 243499        | 3.977983333 | 0.170446566 | 1 | #DIV/0! |
| Vmn1r53 113853       | 3.977983333 | 0.170446566 | 1 | #DIV/0! |
| Cox4i2 84682         | 3.977983333 | 0.170446566 | 1 | #DIV/0! |
| Hoxc4 15423          | 3.977983333 | 0.170446566 | 1 | #DIV/0! |
| Dio2 13371           | 3.977983333 | 0.170446566 | 1 | #DIV/0! |
| Dkl1 50722           | 3.977983333 | 0.170446566 | 1 | #DIV/0! |
| Aldh1l2 216188       | 3.977983333 | 0.170446566 | 1 | #DIV/0! |
| Tmem8c 66139         | 3.977983333 | 0.170446566 | 1 | #DIV/0! |
| Stk32a 269019        | 3.977983333 | 0.170446566 | 1 | #DIV/0! |
| 1700013N18Rik 73318  | 3.977983333 | 0.170446566 | 1 | #DIV/0! |
| Kif5c 16574          | 3.977983333 | 0.170446566 | 1 | #DIV/0! |
| A630055G03Rik 223970 | 3.977983333 | 0.170446566 | 1 | #DIV/0! |
| Ccl7 20306           | 3.977983333 | 0.170446566 | 1 | #DIV/0! |
| Pcdh20 219257        | 3.977983333 | 0.170446566 | 1 | #DIV/0! |
| Htr1a 15550          | 3.977983333 | 0.170446566 | 1 | #DIV/0! |
| Hist1h4n 319161      | 3.977983333 | 0.170446566 | 1 | #DIV/0! |
| Taar5 215854         | 3.977983333 | 0.170446566 | 1 | #DIV/0! |
| Kcnnh2 16511         | 3.977983333 | 0.170446566 | 1 | #DIV/0! |
| Omg 18377            | 3.977983333 | 0.170446566 | 1 | #DIV/0! |
| 4921511H03Rik 70920  | 3.977983333 | 0.170446566 | 1 | #DIV/0! |
| Zic4 22774           | 3.977983333 | 0.170446566 | 1 | #DIV/0! |
| Gm10857 100038358    | 3.977983333 | 0.170446566 | 1 | #DIV/0! |
| Klf8 245671          | 3.977983333 | 0.170446566 | 1 | #DIV/0! |
| Ncr1 17086           | 3.977983333 | 0.170446566 | 1 | #DIV/0! |
| Ccr1 12768           | 3.977983333 | 0.170446566 | 1 | #DIV/0! |
| Sult6b1 73671        | 3.977983333 | 0.170446566 | 1 | #DIV/0! |
| Tbx1 21380           | 3.977983333 | 0.170446566 | 1 | #DIV/0! |
| Adra2c 11553         | 3.977983333 | 0.170446566 | 1 | #DIV/0! |
| Dnahc8 13417         | 3.977983333 | 0.170446566 | 1 | #DIV/0! |
| Pdcd1lg2 58205       | 3.977983333 | 0.170446566 | 1 | #DIV/0! |
| Dner 227325          | 3.977983333 | 0.170446566 | 1 | #DIV/0! |
| Dusp27 240892        | 3.977983333 | 0.170446566 | 1 | #DIV/0! |
| Bean1 65115          | 3.977983333 | 0.170446566 | 1 | #DIV/0! |
| Galnt12 230145       | 3.977983333 | 0.170446566 | 1 | #DIV/0! |
| Ankrd5 319196        | 3.977983333 | 0.170446566 | 1 | #DIV/0! |
| Arid3c 550619        | 3.977983333 | 0.170446566 | 1 | #DIV/0! |
| Ano9 71345           | 3.977983333 | 0.170446566 | 1 | #DIV/0! |
| Rnft2 269695         | 3.977983333 | 0.170446566 | 1 | #DIV/0! |
| Olf855 258517        | 3.977983333 | 0.170446566 | 1 | #DIV/0! |
| Ldlrad1 546840       | 3.977983333 | 0.170446566 | 1 | #DIV/0! |
| Ltf 17002            | 3.977983333 | 0.170446566 | 1 | #DIV/0! |
| Fbxo47 72973         | 3.977983333 | 0.170446566 | 1 | #DIV/0! |
| Adcyap1 11516        | 3.977983333 | 0.170446566 | 1 | #DIV/0! |
| Rhov 228543          | 3.977983333 | 0.170446566 | 1 | #DIV/0! |
| AA388235 433100      | 3.977983333 | 0.170446566 | 1 | #DIV/0! |
| Arrdc5 76920         | 3.977983333 | 0.170446566 | 1 | #DIV/0! |
| Lin7b 22342          | 3.977983333 | 0.170446566 | 1 | #DIV/0! |
| Ttc9 69480           | 3.977983333 | 0.170446566 | 1 | #DIV/0! |
| Scn2a1 110876        | 3.977983333 | 0.170446566 | 1 | #DIV/0! |
| Trim59 66949         | 3.977983333 | 0.170446566 | 1 | #DIV/0! |
| Peg3as 100169889     | 3.977983333 | 0.170446566 | 1 | #DIV/0! |

|                      |             |             |             |             |
|----------------------|-------------|-------------|-------------|-------------|
| Foxc2 14234          | 3.977983333 | 0.170446566 | 1           | #DIV/0!     |
| Nlrp9a 233001        | 3.977983333 | 0.170446566 | 1           | #DIV/0!     |
| Fsd1 240121          | 3.977983333 | 0.170446566 | 1           | #DIV/0!     |
| Reg4 67709           | 3.977983333 | 0.170446566 | 1           | #DIV/0!     |
| 100043387 100043387  | 3.977983333 | 0.170446566 | 1           | #DIV/0!     |
| Nlrp4c 83564         | 3.977983333 | 0.170446566 | 1           | #DIV/0!     |
| Arsj 271970          | 3.977983333 | 0.170446566 | 1           | #DIV/0!     |
| Tmem202 73893        | 3.977983333 | 0.170446566 | 1           | #DIV/0!     |
| Tdh 58865            | 3.977983333 | 0.170446566 | 1           | #DIV/0!     |
| Hbq1a 216635         | 3.95793676  | 0.05601716  | 9.765483333 | 0.036994814 |
| Dusp8 18218          | 3.953980146 | 0.104222197 | 1.994151827 | 0.194282453 |
| Btg3 12228           | 3.942333205 | 0.000479978 | 5.122307458 | 0.000469775 |
| H1fx 243529          | 3.933848241 | 0.037838335 | 2.753817983 | 0.054902851 |
| Trem2 83433          | 3.906196823 | 0.010622187 | 3.906196823 | 0.010622187 |
| Ly6c1 17067          | 3.901658182 | 0.224331247 | 1           | #DIV/0!     |
| Oscp1 230751         | 3.891007218 | 0.067938325 | 9.793016667 | 0.046113179 |
| AA465934 613254      | 3.880067545 | 0.057767295 | 9.765483333 | 0.036994814 |
| 4930534B04Rik 75216  | 3.879358983 | 0.132757893 | 4.57358     | 0.173296754 |
| Kif2c 73804          | 3.814045427 | 0.159242754 | 3.3         | 0.173296754 |
| Olfr1467 258686      | 3.809516667 | 0.170446566 | 1           | #DIV/0!     |
| Lce1a1 67127         | 3.809516667 | 0.170446566 | 1           | #DIV/0!     |
| Vmn1r-ps79 100042966 | 3.809516667 | 0.170446566 | 1           | #DIV/0!     |
| D10Bwg1379e 215821   | 3.809516667 | 0.170446566 | 1           | #DIV/0!     |
| Ppp1r3d 228966       | 3.809516667 | 0.170446566 | 1           | #DIV/0!     |
| Ccl2 20296           | 3.809516667 | 0.170446566 | 1           | #DIV/0!     |
| Abcg4 192663         | 3.809516667 | 0.170446566 | 1           | #DIV/0!     |
| 4930479M11Rik 74927  | 3.809516667 | 0.170446566 | 1           | #DIV/0!     |
| Olfr826 258671       | 3.809516667 | 0.170446566 | 1           | #DIV/0!     |
| Hcn4 330953          | 3.809516667 | 0.170446566 | 1           | #DIV/0!     |
| Hells 15201          | 3.809516667 | 0.170446566 | 1           | #DIV/0!     |
| Zfp287 170740        | 3.809516667 | 0.170446566 | 1           | #DIV/0!     |
| Frmppd4 333605       | 3.809516667 | 0.170446566 | 1           | #DIV/0!     |
| Jsrp1 71912          | 3.809516667 | 0.170446566 | 1           | #DIV/0!     |
| Serpina5 268591      | 3.809516667 | 0.170446566 | 1           | #DIV/0!     |
| Syng4 58867          | 3.809516667 | 0.170446566 | 1           | #DIV/0!     |
| Ctsj 26898           | 3.809516667 | 0.170446566 | 1           | #DIV/0!     |
| 4931417G12Rik 70979  | 3.809516667 | 0.170446566 | 1           | #DIV/0!     |
| Mypn 68802           | 3.809516667 | 0.170446566 | 1           | #DIV/0!     |
| Tnnc2 21925          | 3.809516667 | 0.170446566 | 1           | #DIV/0!     |
| Gm8579 667335        | 3.809516667 | 0.170446566 | 1           | #DIV/0!     |
| Cacna1f 54652        | 3.809516667 | 0.170446566 | 1           | #DIV/0!     |
| Vmn2r7 319217        | 3.809516667 | 0.170446566 | 1           | #DIV/0!     |
| Syce1 74075          | 3.809516667 | 0.170446566 | 1           | #DIV/0!     |
| Fbxo24 71176         | 3.809516667 | 0.170446566 | 1           | #DIV/0!     |
| Slc25a43 194744      | 3.809516667 | 0.170446566 | 1           | #DIV/0!     |
| 2610017I09Rik 66297  | 3.809516667 | 0.170446566 | 1           | #DIV/0!     |
| Cenpf 108000         | 3.809516667 | 0.170446566 | 1           | #DIV/0!     |
| Aloxe3 23801         | 3.809516667 | 0.170446566 | 1           | #DIV/0!     |
| Pea15b 231332        | 3.809516667 | 0.170446566 | 1           | #DIV/0!     |
| Sgpp2 433323         | 3.809516667 | 0.170446566 | 1           | #DIV/0!     |
| Vmn2r96 433070       | 3.809516667 | 0.170446566 | 1           | #DIV/0!     |
| Lrrc18 67580         | 3.809516667 | 0.170446566 | 1           | #DIV/0!     |
| Gm8979 668108        | 3.809516667 | 0.170446566 | 1           | #DIV/0!     |

|                         |             |             |             |             |
|-------------------------|-------------|-------------|-------------|-------------|
| Synb 239167             | 3.809516667 | 0.170446566 | 1           | #DIV/0!     |
| Mapk8ip2 60597          | 3.809516667 | 0.170446566 | 1           | #DIV/0!     |
| 4932435O22Rik 319819    | 3.809516667 | 0.170446566 | 1           | #DIV/0!     |
| Slc34a1 20505           | 3.809516667 | 0.170446566 | 1           | #DIV/0!     |
| Slc6a20a 102680         | 3.809516667 | 0.170446566 | 1           | #DIV/0!     |
| Ntrk3 18213             | 3.809516667 | 0.170446566 | 1           | #DIV/0!     |
| Gpr34 23890             | 3.809516667 | 0.170446566 | 1           | #DIV/0!     |
| Cort 12854              | 3.809516667 | 0.170446566 | 1           | #DIV/0!     |
| Olf1101 258584          | 3.809516667 | 0.170446566 | 1           | #DIV/0!     |
| Dlk1 13386              | 3.809516667 | 0.170446566 | 1           | #DIV/0!     |
| Gm7244 638580           | 3.809516667 | 0.170446566 | 1           | #DIV/0!     |
| Psca 72373              | 3.809516667 | 0.170446566 | 1           | #DIV/0!     |
| Car6 12353              | 3.809516667 | 0.170446566 | 1           | #DIV/0!     |
| Hsf5 327992             | 3.809516667 | 0.170446566 | 1           | #DIV/0!     |
| Gcm1 14531              | 3.809516667 | 0.170446566 | 1           | #DIV/0!     |
| Zfp473 243963           | 3.809516667 | 0.170446566 | 1           | #DIV/0!     |
| Ggt1 14598              | 3.809516667 | 0.170446566 | 1           | #DIV/0!     |
| Col22a1 69700           | 3.809516667 | 0.170446566 | 1           | #DIV/0!     |
| Spink4 20731            | 3.809516667 | 0.170446566 | 1           | #DIV/0!     |
| Tmem178 68027           | 3.809516667 | 0.170446566 | 1           | #DIV/0!     |
| Scn8a 20273             | 3.809516667 | 0.170446566 | 1           | #DIV/0!     |
| Gm13272 545648          | 3.809516667 | 0.170446566 | 1           | #DIV/0!     |
| Ccdc114 211535          | 3.74053955  | 0.133059501 | 3.042145947 | 0.16339816  |
| Tesc 57816              | 3.739736748 | 0.081289166 | 2.163928773 | 0.137345333 |
| Eln 13717               | 3.732224404 | 0.000206267 | 4.773052933 | 1.31312E-05 |
| Stk30 26448             | 3.724305455 | 0.036369637 | 12.8023     | 0.012602066 |
| Ppm1j 71887             | 3.723786667 | 0.0892605   | 8.21776     | 0.082854467 |
| Nlrp10 244202           | 3.695626667 | 0.153034325 | 3.53972     | 0.173296754 |
| Tigd3 332359            | 3.679888608 | 0.103722969 | 3.743778571 | 0.152352456 |
| Usp50 75083             | 3.677031053 | 0.063669074 | 9.0724      | 0.039654813 |
| 1700101E01Rik 329375    | 3.62896     | 0.065032455 | 9.0724      | 0.039654813 |
| Rad51 19361             | 3.608751748 | 0.064586353 | 8.903933333 | 0.039321972 |
| 9130206I24Rik 100040736 | 3.602540606 | 0.181963452 | 3.53972     | 0.173296754 |
| Gpr126 215798           | 3.60237998  | 0.107316187 | 1.966139026 | 0.220917165 |
| Slc10a6 75750           | 3.578797089 | 0.031720463 | 3.578797089 | 0.031720463 |
| Trim16 94092            | 3.572586667 | 0.078605036 | 5.83972     | 0.070910138 |
| Folr4 64931             | 3.56998223  | 0.075316679 | 3.56998223  | 0.075316679 |
| Ccl19 24047             | 3.562291018 | 0.221815908 | 1           | #DIV/0!     |
| 4930515G01Rik 67642     | 3.559346667 | 0.124033453 | 8.898366667 | 0.093248005 |
| Ptplad2 66775           | 3.537752467 | 0.066745558 | 8.903933333 | 0.039321972 |
| Gm10584 100043682       | 3.527786597 | 0.068048998 | 8.704166667 | 0.040875093 |
| Tril 66873              | 3.469709374 | 0.017839765 | 8.405071429 | 0.000482755 |
| Fam107a 268709          | 3.467252671 | 0.027858882 | 3.467252671 | 0.027858882 |
| Hoxb6 15414             | 3.45838024  | 0.070329402 | 8.704166667 | 0.040875093 |
| Col7a1 12836            | 3.453945497 | 0.16456407  | 5.67804     | 0.173296754 |
| Zfp61 22719             | 3.403052924 | 0.028505725 | 4.565971429 | 0.012902258 |
| A630033H20Rik 213438    | 3.358268    | 0.050822861 | 13.99278333 | 0.013272229 |
| Apba2 11784             | 3.351013333 | 0.134555301 | 4.57358     | 0.173296754 |
| BC096441 619441         | 3.349358879 | 0.057839439 | 3.349358879 | 0.057839439 |
| Tubd1 56427             | 3.330075502 | 0.024834983 | 2.397835075 | 0.01236922  |
| Klrb1c 17059            | 3.284361056 | 0.111964723 | 7.945       | 0.070678788 |
| Wdr78 242584            | 3.26166479  | 0.138938281 | 4.37142     | 0.173296754 |
| Tmem181d-ps 100040596   | 3.258824427 | 0.074217586 | 7.1151      | 0.045293991 |

|                         |             |             |              |             |
|-------------------------|-------------|-------------|--------------|-------------|
| Atg9b 213948            | 3.258726585 | 0.124863189 | 5.9435       | 0.070665653 |
| C030039L03Rik 112415    | 3.258227066 | 0.160057873 | 6.27946      | 0.173296754 |
| 9430083A17Rik 77428     | 3.245143218 | 0.160934118 | 2.093696815  | 0.231256853 |
| Mup13 100039089         | 3.233678952 | 0.188798813 | -1.014766578 | 0.482895366 |
| Slc8a2 110891           | 3.233465506 | 0.134933322 | 4.57358      | 0.173296754 |
| Bcl2a1b 12045           | 3.214148479 | 0.062690338 | 4.610871595  | 0.030394878 |
| Myo7b 17922             | 3.206109091 | 0.152221766 | 5.67804      | 0.173296754 |
| Gm996 381353            | 3.192273658 | 0.135622345 | 4.57358      | 0.173296754 |
| Pih1d2 72614            | 3.192273658 | 0.135622345 | 4.57358      | 0.173296754 |
| Ubxn10 212190           | 3.192273658 | 0.135622345 | 4.57358      | 0.173296754 |
| Fbn1 14118              | 3.191467001 | 0.007400191 | 3.041204771  | 0.005698293 |
| Plxna3 18846            | 3.191193333 | 0.136762611 | 4.57358      | 0.173296754 |
| Kcne4 57814             | 3.191193333 | 0.136762611 | 4.57358      | 0.173296754 |
| Hmcn1 545370            | 3.187190303 | 0.08779567  | 10.95596667  | 0.039448802 |
| Plod2 26432             | 3.185324    | 0.060376656 | 13.27218333  | 0.015336703 |
| B430212C06Rik 338360    | 3.179370151 | 0.038929486 | 3.179370151  | 0.038929486 |
| Rnf165 225743           | 3.17658871  | 0.039046076 | 3.17658871   | 0.039046076 |
| Fgf12 14167             | 3.169668957 | 0.058078679 | 11.90945     | 0.015344684 |
| Cx3cr1 13051            | 3.146303205 | 0.057393187 | 12.90393333  | 0.012958419 |
| Oscar 232790            | 3.133335403 | 0.180252483 | 4.37142      | 0.173296754 |
| Lrrc48 74665            | 3.129468247 | 0.138466691 | 4.57358      | 0.173296754 |
| 2610203C20Rik 100042464 | 3.129468247 | 0.138466691 | 4.57358      | 0.173296754 |
| Ldoc1l 223732           | 3.123806667 | 0.140198227 | 4.37142      | 0.173296754 |
| Ube2ql1 76980           | 3.12244934  | 0.00421758  | 5.925245764  | 0.000141973 |
| Ogdhl 239017            | 3.116433333 | 0.170446566 | 1            | #DIV/0!     |
| Dlgap5 218977           | 3.116433333 | 0.170446566 | 1            | #DIV/0!     |
| Tcp10b 21462            | 3.116433333 | 0.170446566 | 1            | #DIV/0!     |
| Zfp184 193452           | 3.116433333 | 0.170446566 | 1            | #DIV/0!     |
| Atcay 16467             | 3.116433333 | 0.170446566 | 1            | #DIV/0!     |
| Clcna 12733             | 3.116433333 | 0.170446566 | 1            | #DIV/0!     |
| Nap1l5 58243            | 3.116433333 | 0.170446566 | 1            | #DIV/0!     |
| Sun3 194974             | 3.116433333 | 0.170446566 | 1            | #DIV/0!     |
| Efcab6 77627            | 3.116433333 | 0.170446566 | 1            | #DIV/0!     |
| Efcab7 230500           | 3.116433333 | 0.170446566 | 1            | #DIV/0!     |
| Gapt 238875             | 3.116433333 | 0.170446566 | 1            | #DIV/0!     |
| Fbxo27 233040           | 3.116433333 | 0.170446566 | 1            | #DIV/0!     |
| Gm5477 432986           | 3.116433333 | 0.170446566 | 1            | #DIV/0!     |
| Cidea 12683             | 3.116433333 | 0.170446566 | 1            | #DIV/0!     |
| Zpbp 53604              | 3.116433333 | 0.170446566 | 1            | #DIV/0!     |
| Gm5124 331392           | 3.116433333 | 0.170446566 | 1            | #DIV/0!     |
| 2310061N02Rik 69661     | 3.116433333 | 0.170446566 | 1            | #DIV/0!     |
| Gm14812 100038584       | 3.116433333 | 0.170446566 | 1            | #DIV/0!     |
| Megf11 214058           | 3.116433333 | 0.170446566 | 1            | #DIV/0!     |
| Tctex1d4 242646         | 3.116433333 | 0.170446566 | 1            | #DIV/0!     |
| Sstr3 20607             | 3.116433333 | 0.170446566 | 1            | #DIV/0!     |
| Pde6h 78600             | 3.116433333 | 0.170446566 | 1            | #DIV/0!     |
| Nr5a1 26423             | 3.116433333 | 0.170446566 | 1            | #DIV/0!     |
| Sertad4 214791          | 3.116433333 | 0.170446566 | 1            | #DIV/0!     |
| Ush2a 22283             | 3.116433333 | 0.170446566 | 1            | #DIV/0!     |
| 4930407110Rik 328573    | 3.116433333 | 0.170446566 | 1            | #DIV/0!     |
| 1700001G17Rik 67503     | 3.116433333 | 0.170446566 | 1            | #DIV/0!     |
| Csf3 12985              | 3.116433333 | 0.170446566 | 1            | #DIV/0!     |
| Klk1b5 16622            | 3.116433333 | 0.170446566 | 1            | #DIV/0!     |

|                      |             |             |             |             |
|----------------------|-------------|-------------|-------------|-------------|
| 4933400F21Rik 74403  | 3.116433333 | 0.170446566 | 1           | #DIV/0!     |
| Cplx4 225644         | 3.116433333 | 0.170446566 | 1           | #DIV/0!     |
| Tg 21819             | 3.116433333 | 0.170446566 | 1           | #DIV/0!     |
| Scn3a 20269          | 3.116433333 | 0.170446566 | 1           | #DIV/0!     |
| Gm1123 382097        | 3.116433333 | 0.170446566 | 1           | #DIV/0!     |
| Adh6a 69117          | 3.116433333 | 0.170446566 | 1           | #DIV/0!     |
| Prokr1 58182         | 3.116433333 | 0.170446566 | 1           | #DIV/0!     |
| Zfp365 216049        | 3.116433333 | 0.170446566 | 1           | #DIV/0!     |
| Ncrna00086 320237    | 3.116433333 | 0.170446566 | 1           | #DIV/0!     |
| AU018829 100041253   | 3.116433333 | 0.170446566 | 1           | #DIV/0!     |
| 0610038B21Rik 70345  | 3.116433333 | 0.170446566 | 1           | #DIV/0!     |
| Asb17 66772          | 3.116433333 | 0.170446566 | 1           | #DIV/0!     |
| Rgs8 67792           | 3.116433333 | 0.170446566 | 1           | #DIV/0!     |
| Prh1 19131           | 3.116433333 | 0.170446566 | 1           | #DIV/0!     |
| Ifng 15978           | 3.116433333 | 0.170446566 | 1           | #DIV/0!     |
| Chi3l3 12655         | 3.116433333 | 0.170446566 | 1           | #DIV/0!     |
| Gm5460 432838        | 3.116433333 | 0.170446566 | 1           | #DIV/0!     |
| Cftr 12638           | 3.116433333 | 0.170446566 | 1           | #DIV/0!     |
| Gjb5 14622           | 3.116433333 | 0.170446566 | 1           | #DIV/0!     |
| Jph3 57340           | 3.116433333 | 0.170446566 | 1           | #DIV/0!     |
| Mrgprd 211578        | 3.116433333 | 0.170446566 | 1           | #DIV/0!     |
| Tuba3b 22147         | 3.116433333 | 0.170446566 | 1           | #DIV/0!     |
| F630043A04Rik 219114 | 3.116433333 | 0.170446566 | 1           | #DIV/0!     |
| Upk1b 22268          | 3.116433333 | 0.170446566 | 1           | #DIV/0!     |
| Ptger4 19219         | 3.116433333 | 0.170446566 | 1           | #DIV/0!     |
| Hsd3b4 15495         | 3.116433333 | 0.170446566 | 1           | #DIV/0!     |
| Taf9b 407786         | 3.116433333 | 0.170446566 | 1           | #DIV/0!     |
| Egr4 13656           | 3.116433333 | 0.170446566 | 1           | #DIV/0!     |
| Pdxk-ps 435518       | 3.116433333 | 0.170446566 | 1           | #DIV/0!     |
| 9230110C19Rik 234912 | 3.116433333 | 0.170446566 | 1           | #DIV/0!     |
| Gpr52 620246         | 3.116433333 | 0.170446566 | 1           | #DIV/0!     |
| Slco5a1 240726       | 3.116433333 | 0.170446566 | 1           | #DIV/0!     |
| Veph1 72789          | 3.116433333 | 0.170446566 | 1           | #DIV/0!     |
| Nptx1 18164          | 3.116433333 | 0.170446566 | 1           | #DIV/0!     |
| Cav3 12391           | 3.116433333 | 0.170446566 | 1           | #DIV/0!     |
| Olf1383 404337       | 3.116433333 | 0.170446566 | 1           | #DIV/0!     |
| Tc2n 74413           | 3.116433333 | 0.170446566 | 1           | #DIV/0!     |
| Celf5 319586         | 3.116433333 | 0.170446566 | 1           | #DIV/0!     |
| Wfdc6a 209351        | 3.116433333 | 0.170446566 | 1           | #DIV/0!     |
| Krtap17-1 77914      | 3.116433333 | 0.170446566 | 1           | #DIV/0!     |
| Adamts6 108154       | 3.116433333 | 0.170446566 | 1           | #DIV/0!     |
| Ptpn5 19259          | 3.116433333 | 0.170446566 | 1           | #DIV/0!     |
| Ska1 66468           | 3.116433333 | 0.170446566 | 1           | #DIV/0!     |
| Sh2d1b1 26904        | 3.116433333 | 0.170446566 | 1           | #DIV/0!     |
| Eid3 66341           | 3.116433333 | 0.170446566 | 1           | #DIV/0!     |
| Pcdha4-g 100384868   | 3.116433333 | 0.170446566 | 1           | #DIV/0!     |
| Gria4 14802          | 3.116433333 | 0.170446566 | 1           | #DIV/0!     |
| Otos 260301          | 3.116433333 | 0.170446566 | 1           | #DIV/0!     |
| Shc4 271849          | 3.116433333 | 0.170446566 | 1           | #DIV/0!     |
| Orc1 18392           | 3.116433333 | 0.170446566 | 1           | #DIV/0!     |
| A530088E08Rik 664702 | 3.116433333 | 0.170446566 | 1           | #DIV/0!     |
| Cd40 21939           | 3.114281061 | 0.061686419 | 3.114281061 | 0.061686419 |
| Fam69b 56279         | 3.110410578 | 0.051552391 | 10.8206     | 0.011663991 |

|                      |             |             |              |             |
|----------------------|-------------|-------------|--------------|-------------|
| Cml5 69049           | 3.110410578 | 0.051552391 | 10.8206      | 0.011663991 |
| Amn 93835            | 3.109956831 | 0.041910654 | 3.886828467  | 0.024940117 |
| Lyz1 17110           | 3.106509142 | 0.012594078 | 3.131760142  | 0.001449907 |
| Lrrc15 74488         | 3.102382993 | 0.007713636 | 3.102382993  | 0.007713636 |
| Fam83a 239463        | 3.101565146 | 0.020391283 | 3.691088418  | 0.002810987 |
| Socs4 67296          | 3.096277143 | 0.068824264 | 18.06161667  | 0.013357098 |
| A630001G21Rik 31997  | 3.082959213 | 0.194284497 | -1.134788439 | 0.440829738 |
| Zfp3 193043          | 3.078359612 | 0.025967824 | 3.078359612  | 0.025967824 |
| Ranbp17 66011        | 3.07306     | 0.233338847 | 1            | #DIV/0!     |
| 4930529C04Rik 619677 | 3.071681119 | 0.092905816 | 10.68586667  | 0.03955673  |
| Gpr137b-ps 664862    | 3.062543314 | 0.016703881 | 5.365907656  | 0.00598711  |
| Rg9mtd2 108943       | 3.061880171 | 0.004318888 | 2.571188616  | 0.00311099  |
| Srl 106393           | 3.056113854 | 0.082256813 | 3.056113854  | 0.082256813 |
| Ccdc28b 66264        | 3.052034456 | 0.00213483  | 2.592036127  | 0.000686924 |
| Phlda3 27280         | 3.045634396 | 0.00114223  | 3.590575392  | 0.001265224 |
| Serpina4-ps1 321018  | 3.035772862 | 0.058421123 | 3.035772862  | 0.058421123 |
| Chrdl2 69121         | 3.026028196 | 0.014789388 | 3.026028196  | 0.014789388 |
| Lysmd2 70082         | 3.001957091 | 0.158372339 | 2.4065875    | 0.148212279 |
| Nrip1 268903         | 3.000609945 | 0.057647865 | 5.784507143  | 0.007629883 |
| Dlec1 320256         | 2.973988596 | 0.117939438 | 1.674490167  | 0.251025789 |
| Ahsg 11625           | 2.96829376  | 4.35996E-07 | 2.727464196  | 1.33065E-07 |
| Defb1 13214          | 2.96477255  | 8.99996E-06 | 3.159219059  | 2.23542E-05 |
| Cyp1a1 13076         | 2.962906367 | 0.020700109 | 6.241014184  | 0.00037111  |
| Mfap2 17150          | 2.95313632  | 0.052099699 | 2.16180782   | 0.098348538 |
| Ptar1 72351          | 2.937747381 | 0.131848884 | 6.91114      | 0.073393406 |
| 2010300C02Rik 72097  | 2.933210314 | 0.165946787 | 5.67804      | 0.173296754 |
| Col3a1 12825         | 2.926735039 | 0.001165837 | 3.201547913  | 0.00184233  |
| Mef2b 17259          | 2.916666667 | 0.170446566 | 1            | #DIV/0!     |
| 4930422G04Rik 71643  | 2.916666667 | 0.170446566 | 1            | #DIV/0!     |
| Cxcl2 20310          | 2.916666667 | 0.170446566 | 1            | #DIV/0!     |
| Clec5a 23845         | 2.916666667 | 0.170446566 | 1            | #DIV/0!     |
| Gpr161 240888        | 2.916666667 | 0.170446566 | 1            | #DIV/0!     |
| Ifitm6 213002        | 2.916666667 | 0.170446566 | 1            | #DIV/0!     |
| Slmo1 225655         | 2.916666667 | 0.170446566 | 1            | #DIV/0!     |
| Dach1 13134          | 2.916666667 | 0.170446566 | 1            | #DIV/0!     |
| Hist3h2bb-ps 382522  | 2.916666667 | 0.170446566 | 1            | #DIV/0!     |
| Gja6 414089          | 2.916666667 | 0.170446566 | 1            | #DIV/0!     |
| Atf7ip2 75329        | 2.916666667 | 0.170446566 | 1            | #DIV/0!     |
| Idi2 320581          | 2.916666667 | 0.170446566 | 1            | #DIV/0!     |
| Actn3 11474          | 2.916666667 | 0.170446566 | 1            | #DIV/0!     |
| Prr7 432763          | 2.916666667 | 0.170446566 | 1            | #DIV/0!     |
| Gm12060 100134990    | 2.916666667 | 0.170446566 | 1            | #DIV/0!     |
| Slit2 20563          | 2.916666667 | 0.170446566 | 1            | #DIV/0!     |
| 5730590G19Rik 77011  | 2.916666667 | 0.170446566 | 1            | #DIV/0!     |
| A2m 232345           | 2.916666667 | 0.170446566 | 1            | #DIV/0!     |
| Hrh1 15465           | 2.916666667 | 0.170446566 | 1            | #DIV/0!     |
| Gldn 235379          | 2.916666667 | 0.170446566 | 1            | #DIV/0!     |
| Gpr61 229714         | 2.916666667 | 0.170446566 | 1            | #DIV/0!     |
| Pbk 52033            | 2.916666667 | 0.170446566 | 1            | #DIV/0!     |
| Gm14351 668960       | 2.916666667 | 0.170446566 | 1            | #DIV/0!     |
| Kif18b 70218         | 2.916666667 | 0.170446566 | 1            | #DIV/0!     |
| Gm10416 667213       | 2.916666667 | 0.170446566 | 1            | #DIV/0!     |
| Wdr52 212517         | 2.916666667 | 0.170446566 | 1            | #DIV/0!     |

|                         |             |             |             |             |
|-------------------------|-------------|-------------|-------------|-------------|
| D7Ert443e 71007         | 2.916666667 | 0.170446566 | 1           | #DIV/0!     |
| 9930111J21Rik1 667214   | 2.916666667 | 0.170446566 | 1           | #DIV/0!     |
| Calb1 12307             | 2.916666667 | 0.170446566 | 1           | #DIV/0!     |
| 5830432E09Rik 67765     | 2.916666667 | 0.170446566 | 1           | #DIV/0!     |
| Smcp 17235              | 2.916666667 | 0.170446566 | 1           | #DIV/0!     |
| Apol8 239552            | 2.916666667 | 0.170446566 | 1           | #DIV/0!     |
| Adamtsl3 269959         | 2.916666667 | 0.170446566 | 1           | #DIV/0!     |
| Eddm3b 219026           | 2.916666667 | 0.170446566 | 1           | #DIV/0!     |
| Pou2f3 18988            | 2.916666667 | 0.170446566 | 1           | #DIV/0!     |
| Stc1 20855              | 2.916666667 | 0.170446566 | 1           | #DIV/0!     |
| H2-M5 240095            | 2.916666667 | 0.170446566 | 1           | #DIV/0!     |
| Syt4 20983              | 2.916666667 | 0.170446566 | 1           | #DIV/0!     |
| Wfdc13 408190           | 2.916666667 | 0.170446566 | 1           | #DIV/0!     |
| 1700012A16Rik 71836     | 2.916666667 | 0.170446566 | 1           | #DIV/0!     |
| Itga2 16398             | 2.916666667 | 0.170446566 | 1           | #DIV/0!     |
| Unc5cl 76589            | 2.916666667 | 0.170446566 | 1           | #DIV/0!     |
| Gdf3 14562              | 2.916666667 | 0.170446566 | 1           | #DIV/0!     |
| Fam163b 109349          | 2.916666667 | 0.170446566 | 1           | #DIV/0!     |
| Lrfn1 80749             | 2.916666667 | 0.170446566 | 1           | #DIV/0!     |
| A230020J21Rik 100125339 | 2.916666667 | 0.170446566 | 1           | #DIV/0!     |
| Cacna1g 12291           | 2.916666667 | 0.170446566 | 1           | #DIV/0!     |
| Scara5 71145            | 2.916666667 | 0.170446566 | 1           | #DIV/0!     |
| Rab44 442827            | 2.916666667 | 0.170446566 | 1           | #DIV/0!     |
| 9030418K01Rik 71532     | 2.916666667 | 0.170446566 | 1           | #DIV/0!     |
| Gjd3 353155             | 2.916666667 | 0.170446566 | 1           | #DIV/0!     |
| Ccdc109b 66815          | 2.916666667 | 0.170446566 | 1           | #DIV/0!     |
| Cldnd2 74276            | 2.916666667 | 0.170446566 | 1           | #DIV/0!     |
| Fam78b 226610           | 2.916666667 | 0.170446566 | 1           | #DIV/0!     |
| Ddx4 13206              | 2.916666667 | 0.170446566 | 1           | #DIV/0!     |
| Tmeff1 230157           | 2.916666667 | 0.170446566 | 1           | #DIV/0!     |
| Trim15 69097            | 2.916666667 | 0.170446566 | 1           | #DIV/0!     |
| Myoz1 59011             | 2.916666667 | 0.170446566 | 1           | #DIV/0!     |
| Galnt1 108760           | 2.916666667 | 0.170446566 | 1           | #DIV/0!     |
| Cacnb2 12296            | 2.916666667 | 0.170446566 | 1           | #DIV/0!     |
| Sfmbt2 353282           | 2.916666667 | 0.170446566 | 1           | #DIV/0!     |
| Gm16432 545391          | 2.916666667 | 0.170446566 | 1           | #DIV/0!     |
| Defb25 654459           | 2.916666667 | 0.170446566 | 1           | #DIV/0!     |
| Dsn1 66934              | 2.916666667 | 0.170446566 | 1           | #DIV/0!     |
| Kif15 209737            | 2.916666667 | 0.170446566 | 1           | #DIV/0!     |
| Gnrh1 14714             | 2.916666667 | 0.170446566 | 1           | #DIV/0!     |
| AU015228 99169          | 2.916666667 | 0.170446566 | 1           | #DIV/0!     |
| Pla2g2c 18781           | 2.916666667 | 0.170446566 | 1           | #DIV/0!     |
| Cdc7 12545              | 2.916666667 | 0.170446566 | 1           | #DIV/0!     |
| Stard6 170461           | 2.916666667 | 0.170446566 | 1           | #DIV/0!     |
| Utf1 22286              | 2.916666667 | 0.170446566 | 1           | #DIV/0!     |
| Rhag 19743              | 2.916666667 | 0.170446566 | 1           | #DIV/0!     |
| Gm11744 100038570       | 2.89224     | 0.155528256 | 3.67672     | 0.173296754 |
| Lrrn3 16981             | 2.892152542 | 0.174223354 | 4.57358     | 0.173296754 |
| Cyp21a1 13079           | 2.886793345 | 0.238328751 | 1           | #DIV/0!     |
| Mmp8 17394              | 2.886793345 | 0.238328751 | 1           | #DIV/0!     |
| Snora31 100303751       | 2.886793345 | 0.238328751 | 1           | #DIV/0!     |
| Sparc 20692             | 2.885448988 | 4.41793E-06 | 2.620785849 | 3.50602E-06 |
| Stk36 269209            | 2.884148    | 0.136456126 | 6.87358     | 0.077234609 |



|                      |             |             |             |             |
|----------------------|-------------|-------------|-------------|-------------|
| Aph1c 68318          | 2.880644935 | 0.035167643 | 3.954855645 | 0.028004916 |
| E130317F20Rik 414101 | 2.87607034  | 0.076939028 | 2.87607034  | 0.076939028 |
| Gm10684 100038468    | 2.85715     | 0.170446566 | 1           | #DIV/0!     |
| Nkain1 67149         | 2.855254079 | 0.052514697 | 5.812821429 | 0.021483219 |
| Kcnab1 16497         | 2.849053333 | 0.240100451 | 1           | #DIV/0!     |
| Gm5936 546325        | 2.843088646 | 0.157812218 | 3.53972     | 0.173296754 |
| Pde10a 23984         | 2.825459122 | 0.051299627 | 5.305119048 | 0.023535745 |
| Il28ra 242700        | 2.824352419 | 0.054691734 | 4.961628017 | 0.029557463 |
| Ephb2 13844          | 2.814005471 | 0.143554243 | 2.522267924 | 0.170579472 |
| Atp4a 11944          | 2.807114454 | 0.102657133 | 9.765483333 | 0.036994814 |
| Gm6578 625347        | 2.800028446 | 0.134958428 | 1.465737987 | 0.299106435 |
| Gpr84 80910          | 2.798276035 | 0.110663236 | 3.275507143 | 0.137461249 |
| Casp1 12362          | 2.788220077 | 0.023163397 | 2.788220077 | 0.023163397 |
| Mt3 17751            | 2.787153169 | 0.161241959 | 3.53972     | 0.173296754 |
| Tnfrsf22 79202       | 2.782386667 | 0.148760575 | 6.955966667 | 0.093223255 |
| Kbtbd12 74589        | 2.782386667 | 0.148760575 | 6.955966667 | 0.093223255 |
| Kcne3 57442          | 2.776091341 | 0.161058636 | 8.14716     | 0.070556641 |
| Sytl2 83671          | 2.761524321 | 0.131665198 | 1.651708384 | 0.282826441 |
| Lefty1 13590         | 2.757599408 | 0.108682563 | 4.84436092  | 0.075835431 |
| 5830433M19Rik 67770  | 2.756399218 | 0.02196407  | 2.759672917 | 0.020297306 |
| 2200002K05Rik 69137  | 2.750964273 | 0.149609968 | 6.7875      | 0.093349877 |
| Ttc25 74407          | 2.750964273 | 0.149609968 | 6.7875      | 0.093349877 |
| Slc7a15 328059       | 2.75024149  | 0.242980184 | 1           | #DIV/0!     |
| Gimap7 231932        | 2.739827501 | 0.225849817 | 1.282144901 | 0.403677687 |
| Ntf3 18205           | 2.734465105 | 0.029969832 | 3.268667731 | 0.004514089 |
| Slc30a3 22784        | 2.733228473 | 0.023936667 | 2.14232367  | 0.032594979 |
| Lpl 16956            | 2.729160359 | 0.073642501 | 1.683789133 | 0.053204821 |
| H2-Eb2 381091        | 2.726013333 | 0.167391575 | 3.3         | 0.173296754 |
| Adcy1 432530         | 2.722279169 | 0.075215789 | 2.671746911 | 0.091718873 |
| Ifi30 65972          | 2.720342849 | 0.001301376 | 3.2154996   | 0.001158145 |
| Zfp82 330502         | 2.719985586 | 0.221490726 | 4.57358     | 0.173296754 |
| Prx 19153            | 2.716398112 | 0.097732526 | 2.716398112 | 0.097732526 |
| Taf7 24074           | 2.716266644 | 0.00011605  | 2.478310032 | 3.61116E-05 |
| Carf 241066          | 2.715       | 0.152057578 | 6.7875      | 0.093349877 |
| 1700065D16Rik 73410  | 2.714286667 | 0.244880741 | 1           | #DIV/0!     |
| Adamts15 235130      | 2.713404498 | 0.018645576 | 2.285541019 | 0.038020753 |
| Sypl2 17306          | 2.696841269 | 0.15332937  | 6.7875      | 0.093349877 |
| Klhl35 72184         | 2.696132706 | 0.245863496 | 1           | #DIV/0!     |
| Gm8898 667962        | 2.690618563 | 0.056787405 | 3.5559811   | 0.04845082  |
| Cacnb1 12295         | 2.679555487 | 0.091596511 | 3.729437629 | 0.072405744 |
| Tspan2 70747         | 2.677213483 | 0.064172469 | 2.677213483 | 0.064172469 |
| Zfp52 22710          | 2.675963394 | 0.062832648 | 5.447815476 | 0.024025977 |
| Rn4.5s 19799         | 2.665493324 | 0.026808233 | 2.04960401  | 0.031553492 |
| C1qtnf4 67445        | 2.660307122 | 0.032223216 | 4.057709175 | 0.016528429 |
| 2410066E13Rik 68235  | 2.655794567 | 0.199970755 | 3.53972     | 0.173296754 |
| Fabp7 12140          | 2.649646748 | 0.013715606 | 2.155434307 | 0.01496086  |
| Wisp2 22403          | 2.644901703 | 0.061070498 | 3.892293061 | 0.042641762 |
| U05342 664779        | 2.641694657 | 0.129703502 | 14.40573333 | 0.037388319 |
| Zfp57 22715          | 2.629614545 | 0.204910708 | 3.3         | 0.173296754 |
| Ppic 19038           | 2.624083473 | 0.000730393 | 2.393000155 | 0.001017908 |
| H2-Q2 15013          | 2.614588584 | 0.192793783 | 2.056679634 | 0.287773807 |
| Tmem44 224090        | 2.61363711  | 0.004929071 | 3.907382947 | 0.000674506 |
| Cdkl5 382253         | 2.612532873 | 0.037228385 | 6.325299372 | 0.000342126 |

|                      |             |             |              |             |
|----------------------|-------------|-------------|--------------|-------------|
| 1110038B12Rik 68763  | 2.608550791 | 0.031137125 | 2.434561288  | 0.00023327  |
| Rgs20 58175          | 2.607539394 | 0.260997899 | 1            | #DIV/0!     |
| Ebf1 13591           | 2.607539394 | 0.260997899 | 1            | #DIV/0!     |
| C530028O21Rik 319352 | 2.603105145 | 0.007893786 | 4.147511331  | 0.00019383  |
| Rab38 72433          | 2.59640355  | 0.064304296 | 4.599236461  | 0.030617495 |
| Pira1 18722          | 2.587116252 | 0.263497363 | -2.83174     | 0.173296754 |
| Kcnj2 16518          | 2.5851103   | 0.128882411 | 2.8375       | 0.148931563 |
| Tmsb15l 399591       | 2.575704309 | 0.162584865 | 5.83972      | 0.070910138 |
| Jazf1 231986         | 2.569056268 | 0.132724472 | 2.889777527  | 0.16314115  |
| Fabp5 16592          | 2.568420609 | 0.056266577 | 2.474011539  | 0.051193519 |
| Cgref1 68567         | 2.560854185 | 0.083559063 | 1.618917549  | 0.126633563 |
| Trpm5 56843          | 2.552982248 | 0.098723944 | 3.785941828  | 0.074465341 |
| Kiss1 280287         | 2.55060734  | 0.142920574 | 2.486665807  | 0.141944192 |
| Tmem181b-ps 547127   | 2.550544856 | 0.082579195 | 2.919312071  | 0.049069066 |
| Kcnj15 16516         | 2.549113815 | 0.061040819 | 2.549113815  | 0.061040819 |
| Gdf15 23886          | 2.534032693 | 0.049764334 | 1.610965677  | 0.124762153 |
| Csl 71832            | 2.522788917 | 0.102748231 | 5.316067941  | 0.047644272 |
| Hrk 12123            | 2.517914875 | 0.148064975 | 15.42055     | 0.041646676 |
| Hist1h2ae 319166     | 2.517222222 | 0.187010324 | 10.57233333  | 0.093237772 |
| Fxyd2 11936          | 2.515759198 | 0.119865831 | 16.8085      | 0.017611408 |
| Mup11 100039028      | 2.504386307 | 0.017166586 | 3.994525553  | 8.30727E-05 |
| 1700012L04Rik 76383  | 2.503493125 | 0.189577433 | 1.101858099  | 0.45752294  |
| Fam105a 223433       | 2.502444843 | 0.054944891 | 4.636983879  | 0.018121944 |
| Ms4a7 109225         | 2.499942648 | 0.032945982 | 4.242399851  | 0.001695931 |
| Fam132a 67389        | 2.499170484 | 0.095842674 | 4.981951187  | 0.044457051 |
| Slc44a4 70129        | 2.493300172 | 0.073993218 | 3.669193055  | 0.050312798 |
| Cyp4a12b 13118       | 2.487083939 | 0.115145375 | 2.487083939  | 0.115145375 |
| Tes 21753            | 2.480663244 | 0.011677828 | 1.765747224  | 0.032827429 |
| 4632427E13Rik 666737 | 2.477653967 | 0.117495446 | 4.388884949  | 0.072624033 |
| Clec9a 232414        | 2.476312705 | 0.115210454 | 2.476312705  | 0.115210454 |
| Neurl1a 18011        | 2.475003873 | 0.120469272 | 1.458446522  | 0.255313708 |
| Snord17 100313519    | 2.470058566 | 0.168893134 | 3.53972      | 0.173296754 |
| 4933408B17Rik 271508 | 2.470058566 | 0.168893134 | 3.53972      | 0.173296754 |
| Zc3h6 78751          | 2.459397275 | 0.017606776 | 3.493962232  | 0.000354053 |
| Kcnj9 16524          | 2.45895342  | 0.2149004   | 3.53972      | 0.173296754 |
| Grrp1 72690          | 2.45071285  | 0.088983273 | 2.45071285   | 0.088983273 |
| Wdyhv1 76773         | 2.45048315  | 0.030045549 | 2.458419579  | 0.006298747 |
| Ier3 15937           | 2.449283445 | 0.168039384 | 3.856576765  | 0.15707777  |
| Marco 17167          | 2.448560981 | 0.065451299 | 1.96459241   | 0.002722507 |
| Fstl3 83554          | 2.447920618 | 0.153745599 | 2.790359268  | 0.128213591 |
| Purg 75029           | 2.441730619 | 0.0206954   | 2.441730619  | 0.0206954   |
| Slc4a11 269356       | 2.437766667 | 0.171835685 | 3.53972      | 0.173296754 |
| Zbtb34 241311        | 2.43607593  | 0.00139803  | 3.11929472   | 0.000310128 |
| Npas2 18143          | 2.429386104 | 0.006446645 | 2.839820784  | 0.005785473 |
| Cldn7 53624          | 2.428781476 | 0.078067856 | 4.98608485   | 0.025165007 |
| Amz1 231842          | 2.420937789 | 0.028185563 | 3.473544971  | 0.002086567 |
| Nrp 654309           | 2.420696195 | 0.153312894 | 4.067889431  | 0.110381005 |
| 1700020L24Rik 66330  | 2.419481903 | 0.229625126 | -1.010193328 | 0.495713255 |
| Adcy3 104111         | 2.416598239 | 0.107172252 | 3.198618768  | 0.084668453 |
| Lmod2 93677          | 2.412125424 | 0.210610801 | 4.37142      | 0.173296754 |
| Mup10 100039008      | 2.406679378 | 0.199801202 | 5.488748047  | 0.132379071 |
| Chga 12652           | 2.405786044 | 0.222351506 | 3.3          | 0.173296754 |
| Gm10394 100039227    | 2.405666667 | 0.170446566 | 1            | #DIV/0!     |

|                         |             |             |             |             |
|-------------------------|-------------|-------------|-------------|-------------|
| Bcl2a1a 12044           | 2.405666667 | 0.170446566 | 1           | #DIV/0!     |
| Duxbl 278672            | 2.405666667 | 0.170446566 | 1           | #DIV/0!     |
| Mettl7a2 393082         | 2.403699306 | 0.103703211 | 4.614924264 | 0.04929297  |
| Kbtbd8 243574           | 2.401779261 | 0.17221504  | 3.53972     | 0.173296754 |
| 6330439K17Rik 241688    | 2.393088571 | 0.16512883  | 9.25162     | 0.073125351 |
| 2610524H06Rik 330173    | 2.391606674 | 0.156448133 | 2.365584001 | 0.182575382 |
| ltk 16428               | 2.389093415 | 0.176790463 | 3.3         | 0.173296754 |
| Il23a 83430             | 2.389093415 | 0.176790463 | 3.3         | 0.173296754 |
| Myo1h 231646            | 2.384175508 | 0.148828838 | 2.189757812 | 0.087448342 |
| Prkcc 18752             | 2.380221654 | 0.215488643 | 1.583400343 | 0.341557484 |
| 2610028H24Rik 76964     | 2.380013328 | 0.200710039 | 1           | #DIV/0!     |
| Tuba8 53857             | 2.373244561 | 0.006330817 | 2.01214985  | 0.004296846 |
| Klhdc7b 546648          | 2.371216878 | 0.124900356 | 4.181386905 | 0.074733521 |
| Atad5 237877            | 2.36928393  | 0.21925944  | 3.53972     | 0.173296754 |
| Gdpd1 66569             | 2.368936556 | 0.01537315  | 1.995356884 | 0.033111036 |
| Snrpn 20646             | 2.364964752 | 0.147948258 | 2.364964752 | 0.147948258 |
| Etv1 14009              | 2.35786     | 0.179890944 | 3.3         | 0.173296754 |
| B4galnt4 330671         | 2.35786     | 0.179890944 | 3.3         | 0.173296754 |
| Cbr2 12409              | 2.35786     | 0.179890944 | 3.3         | 0.173296754 |
| Eif4ebp3 108112         | 2.356717872 | 0.023755013 | 2.791353807 | 0.001791607 |
| Abca14 67928            | 2.35452619  | 0.176928091 | 3.53972     | 0.173296754 |
| Fbxo2 230904            | 2.351226258 | 0.062046805 | 1.982912292 | 0.105577688 |
| Lingo4 320747           | 2.347597785 | 0.113520347 | 2.347597785 | 0.113520347 |
| Hbegf 15200             | 2.343443295 | 0.035762657 | 2.343443295 | 0.035762657 |
| Cenpw 66311             | 2.342471633 | 0.003615987 | 2.342471633 | 0.003615987 |
| Fam54a 71804            | 2.342089928 | 0.181499927 | 3.3         | 0.173296754 |
| Rnase10 75019           | 2.342089928 | 0.181499927 | 3.3         | 0.173296754 |
| Vsig2 57276             | 2.341056373 | 0.085639457 | 2.341056373 | 0.085639457 |
| Gpnmb 93695             | 2.339928941 | 0.013389833 | 2.339928941 | 0.013389833 |
| 1700102P08Rik 112418    | 2.338355483 | 0.158242336 | 2.576554452 | 0.166099216 |
| A130049A11Rik 100125931 | 2.336128512 | 0.087195606 | 1.680992437 | 0.179410848 |
| 6720463M24Rik 77744     | 2.33049697  | 0.1434905   | 8.011083333 | 0.041592481 |
| Sytl3 83672             | 2.33049697  | 0.1434905   | 8.011083333 | 0.041592481 |
| Mex3a 72640             | 2.324930561 | 0.148713002 | 9.765483333 | 0.036994814 |
| Tbx6 21389              | 2.324510461 | 0.120082481 | 2.324510461 | 0.120082481 |
| Cdkn1a 12575            | 2.320331616 | 0.000574149 | 1.949242025 | 0.000531049 |
| 2810055G20Rik 77994     | 2.316591184 | 0.14872368  | 8.704166667 | 0.040875093 |
| Il20rb 213208           | 2.313923531 | 0.07686541  | 1.636863269 | 0.146560101 |
| Ranbp3l 223332          | 2.303770277 | 0.076673611 | 4.829592357 | 0.002861308 |
| Gtf3c3 98488            | 2.303446842 | 0.083332353 | 6.555103707 | 0.001905055 |
| Cend1 57754             | 2.303238698 | 0.039209414 | 3.074171835 | 0.024170728 |
| Cd300lh 382551          | 2.30296     | 0.130123369 | 5.7574      | 0.045879649 |
| Hsd17b1 15485           | 2.302807455 | 0.146948012 | 8.011083333 | 0.041592481 |
| Elf1 243312             | 2.301900721 | 0.172488393 | 2.185849682 | 0.229040358 |
| Mmp2 17390              | 2.301516312 | 0.013846197 | 1.901963627 | 0.013607713 |
| Gpcpd1 74182            | 2.300666261 | 0.007197504 | 2.088738822 | 0.016033855 |
| Zfp28 22690             | 2.300061582 | 0.093168148 | 4.635274094 | 0.030909972 |
| Ccne1 12447             | 2.294696164 | 0.063483626 | 1.731490523 | 0.12432269  |
| Slc25a18 71803          | 2.291301818 | 0.1993985   | 4.57358     | 0.173296754 |
| Galr2 14428             | 2.291301818 | 0.1993985   | 4.57358     | 0.173296754 |
| Plch2 269615            | 2.291301818 | 0.1993985   | 4.57358     | 0.173296754 |
| Il13ra2 16165           | 2.290473333 | 0.183544433 | 3.3         | 0.173296754 |
| Gm3852 100042453        | 2.290473333 | 0.183544433 | 3.3         | 0.173296754 |

|                      |             |             |              |             |
|----------------------|-------------|-------------|--------------|-------------|
| Ppfia2 327814        | 2.290473333 | 0.183544433 | 3.3          | 0.173296754 |
| Gucy2c 14917         | 2.287314907 | 0.18338723  | 2.73911337   | 0.199024953 |
| Ttll10 330010        | 2.279457836 | 0.292458552 | 1            | #DIV/0!     |
| Nfasc 269116         | 2.27529771  | 0.066768958 | 2.716264474  | 0.019677593 |
| Mycn 18109           | 2.275153963 | 0.18524447  | 3.3          | 0.173296754 |
| Ksr2 333050          | 2.275153963 | 0.18524447  | 3.3          | 0.173296754 |
| Gpr25 383563         | 2.275153963 | 0.18524447  | 3.3          | 0.173296754 |
| Senp8 71599          | 2.274579417 | 0.052543614 | 5.05030933   | 0.002852452 |
| 1700120K04Rik 68232  | 2.273524777 | 0.239636379 | 1.282144901  | 0.403677687 |
| Rnf122 68867         | 2.266490667 | 0.030923588 | 2.142051757  | 0.021544319 |
| Rims2 116838         | 2.264077995 | 0.202427117 | 4.57358      | 0.173296754 |
| Gm5176 382421        | 2.264077995 | 0.202427117 | 4.57358      | 0.173296754 |
| 9230114K14Rik 414108 | 2.261164196 | 0.117924066 | 2.637930861  | 0.112832362 |
| Cxcr6 80901          | 2.257673417 | 0.1981054   | 2.22660095   | 0.276424976 |
| Kcnk1 16525          | 2.251261348 | 0.140423763 | 1.471957116  | 0.29708192  |
| Fbp2 14120           | 2.244866574 | 0.205786281 | 4.37142      | 0.173296754 |
| B3galtl 381694       | 2.242353424 | 0.047203915 | 2.242353424  | 0.047203915 |
| Cxcr4 12767          | 2.242131018 | 0.047688181 | 1.682774246  | 0.067909936 |
| Fgf21 56636          | 2.22043946  | 0.04010768  | 1.667096634  | 0.035509088 |
| Dnmt3b 13436         | 2.218283759 | 0.004065788 | 2.39869549   | 0.001770362 |
| Zfpm2 22762          | 2.216210946 | 0.219369102 | -1.134788439 | 0.440829738 |
| Prex2 109294         | 2.216160381 | 0.031667241 | 2.840056922  | 0.019698144 |
| Bambi-ps1 81913      | 2.215651799 | 0.208060746 | 4.37142      | 0.173296754 |
| Fam83c 71405         | 2.215269076 | 0.191416965 | 2.215269076  | 0.191416965 |
| Zcchc3 67917         | 2.211327179 | 0.068548783 | 3.51551047   | 0.027762777 |
| Plaur 18793          | 2.20964514  | 0.111383424 | 1.442741632  | 0.233355605 |
| Mup12 100039054      | 2.206363097 | 0.103068227 | 4.678077427  | 0.028472374 |
| Slc25a14 20523       | 2.203809886 | 0.043488831 | 2.211106646  | 0.011587813 |
| Cd28 12487           | 2.2         | 0.290356397 | 1            | #DIV/0!     |
| Gab3 210710          | 2.199665627 | 0.203988044 | 1.678513561  | 0.28897435  |
| Myo5a 17918          | 2.193968215 | 0.133069761 | 2.193968215  | 0.133069761 |
| Chrna1 11435         | 2.193518709 | 0.22487356  | -1.202217172 | 0.412618198 |
| Plk1 18817           | 2.193265644 | 0.042079419 | 2.006262235  | 0.079761356 |
| Gm684 270157         | 2.191152743 | 0.179439119 | 2.085614286  | 0.20345464  |
| Rpph1 85029          | 2.190796733 | 0.191297962 | 2.254167548  | 0.083917159 |
| Cyp3a11 13112        | 2.190212042 | 0.005157967 | 2.215739564  | 0.000901156 |
| Sdsl 257635          | 2.189867706 | 0.000895364 | 1.781001307  | 0.001648827 |
| Ctsk 13038           | 2.1886308   | 0.076316176 | 1.582914356  | 0.146353588 |
| Gm1078 381835        | 2.188430076 | 0.270704681 | 1            | #DIV/0!     |
| Gm505 244666         | 2.181196811 | 0.163145159 | 2.536228187  | 0.180227025 |
| Ammecr1 56068        | 2.179437443 | 0.158589641 | 1.337812817  | 0.344524566 |
| Mmp7 17393           | 2.17570462  | 0.133472163 | 5.59481597   | 0.035771861 |
| Arhgap15 76117       | 2.17332039  | 0.096493798 | 3.8645       | 0.03645035  |
| Pycr1 209027         | 2.166478569 | 0.227538243 | -1.217222222 | 0.407029201 |
| Cdk1 12534           | 2.165065669 | 0.086906427 | 2.165065669  | 0.086906427 |
| Nexn 68810           | 2.164040602 | 0.165239983 | 2.164040602  | 0.165239983 |
| Tnfrsf23 79201       | 2.163673492 | 0.075533076 | 5.093762175  | 0.001129622 |
| Ccdc38 237465        | 2.160493827 | 0.277241136 | 1            | #DIV/0!     |
| Nlrp1b 637515        | 2.15982     | 0.273363112 | 1            | #DIV/0!     |
| Ccnb2 12442          | 2.15982     | 0.273363112 | 1            | #DIV/0!     |
| Fstl1 14314          | 2.158412251 | 0.014354335 | 2.489197952  | 0.000942111 |
| Kiss1r 114229        | 2.156574601 | 0.055970663 | 1.685628806  | 0.108641563 |
| Adh7 11529           | 2.15563204  | 0.041322894 | 1.666914956  | 0.057967775 |

|                      |             |             |              |             |
|----------------------|-------------|-------------|--------------|-------------|
| C1qtnf6 72709        | 2.153554844 | 0.008752276 | 2.133333625  | 0.006360016 |
| Fst 14313            | 2.151105344 | 0.025004802 | 1.800066572  | 0.052063672 |
| Pkp1 18772           | 2.145374479 | 0.274736836 | 1            | #DIV/0!     |
| Kif22 110033         | 2.141172487 | 0.121649122 | 2.141172487  | 0.121649122 |
| Esm1 71690           | 2.139378613 | 0.195786709 | 1.135800217  | 0.439334996 |
| Rnf222 320040        | 2.136554483 | 0.233161467 | 12.90835     | 0.093342877 |
| Fcgbp 215384         | 2.135513426 | 0.295738231 | -7.752983333 | 0.04363352  |
| Scn4b 399548         | 2.13300482  | 0.059606122 | 2.701086705  | 0.00984032  |
| Aatk 11302           | 2.129745309 | 0.008068342 | 1.596354982  | 0.013828644 |
| Sh3kbp1 58194        | 2.129603398 | 0.087769011 | 3.289617313  | 0.04192803  |
| Lepr 16847           | 2.128331766 | 0.039013422 | 3.035956208  | 0.013679005 |
| Sult1e1 20860        | 2.127358373 | 0.17107164  | 3.71340082   | 0.075478342 |
| Apoa4 11808          | 2.125675491 | 0.103542294 | 1.670077371  | 0.103075619 |
| Hspa2 15512          | 2.123844273 | 0.026330353 | 1.716730735  | 0.032847113 |
| Ncapg2 76044         | 2.12331939  | 0.220639957 | 4.57358      | 0.173296754 |
| Car7 12354           | 2.119539183 | 0.054550945 | 3.71744624   | 0.00765789  |
| 6030429G01Rik 436022 | 2.118490596 | 0.223417656 | 8.898366667  | 0.093248005 |
| Kbtbd3 69149         | 2.116930925 | 0.113248914 | 3.029013053  | 0.074474039 |
| Snhg9 73474          | 2.114605088 | 0.179845494 | 2.522267924  | 0.170579472 |
| 2700046G09Rik 67188  | 2.114009353 | 0.003430975 | 2.467344101  | 0.001959975 |
| BC088983 382010      | 2.11247683  | 0.007568708 | 2.855743599  | 8.71347E-05 |
| Sag 20215            | 2.111635179 | 0.044670144 | 1.711331436  | 0.086461645 |
| Ly9 17085            | 2.104024403 | 0.006610341 | 1.941218448  | 0.014717327 |
| Nat1 17960           | 2.103318255 | 0.109114508 | 3.980420992  | 0.035292797 |
| 2310001K24Rik 69517  | 2.100965072 | 0.176137696 | 2.100965072  | 0.176137696 |
| Srms 20811           | 2.099102744 | 0.196719596 | 1.885227492  | 0.252057711 |
| Suv39h2 64707        | 2.09686603  | 0.156879055 | 2.055258092  | 0.209773586 |
| Pxdn 69675           | 2.096142662 | 0.025354505 | 2.096142662  | 0.025354505 |
| 4930539E08Rik 207819 | 2.091802609 | 0.118760139 | 3.563647335  | 0.054359203 |
| Gm3435 100041621     | 2.084896128 | 0.079441105 | 2.084896128  | 0.079441105 |
| Fam161b 217705       | 2.08411204  | 0.184317777 | 2.540464286  | 0.169047969 |
| Penk 18619           | 2.083733982 | 0.216684144 | 2.083733982  | 0.216684144 |
| Igsf9 93842          | 2.077954955 | 0.153287471 | 1.880524014  | 0.189903834 |
| Cx3cl1 20312         | 2.072067748 | 0.046512821 | 2.230650532  | 0.039428076 |
| Tmem22 245020        | 2.072038788 | 0.294164169 | 1            | #DIV/0!     |
| Vgll3 73569          | 2.072038788 | 0.294164169 | 1            | #DIV/0!     |
| BC030867 217216      | 2.070856564 | 0.131677896 | 1.374335034  | 0.285401788 |
| Dbf4 27214           | 2.065471429 | 0.218208113 | 6.91114      | 0.073393406 |
| Ing4 28019           | 2.06198126  | 3.26359E-06 | 2.149322203  | 6.7935E-06  |
| Layn 244864          | 2.061058945 | 0.128787189 | 4.360292172  | 0.036716707 |
| Npb 208990           | 2.059326037 | 0.230012729 | 1.656626026  | 0.330587367 |
| Tubb2a 22151         | 2.059242621 | 0.000272987 | 1.898604309  | 0.000121069 |
| Mir715 751530        | 2.055241209 | 0.298133654 | -2.8202      | 0.173296754 |
| Tmem171 380863       | 2.048947682 | 0.238583655 | 6.67142      | 0.075644577 |
| Syt5 53420           | 2.047420112 | 0.296653541 | 1            | #DIV/0!     |
| Tppp3 67971          | 2.046611324 | 0.152725    | 7.887068562  | 0.014687605 |
| Rasgrf2 19418        | 2.043561543 | 0.109577893 | 2.043561543  | 0.109577893 |
| Gm885 380732         | 2.040923904 | 0.148479768 | 8.185476568  | 0.010104572 |
| Fhit 14198           | 2.040243189 | 0.022333956 | 2.625529333  | 0.001719268 |
| A530064D06Rik 328830 | 2.039908403 | 0.202163233 | 5.0331       | 0.093589634 |
| Avil 11567           | 2.039908403 | 0.202163233 | 5.0331       | 0.093589634 |
| Itgae 16407          | 2.038743861 | 0.232333225 | 1.621721864  | 0.33676256  |
| Prom2 192212         | 2.037492431 | 0.166085961 | 3.579326525  | 0.091893115 |

|                      |             |             |              |             |
|----------------------|-------------|-------------|--------------|-------------|
| Myh7b 668940         | 2.035443888 | 0.173272009 | 1.273215927  | 0.369574783 |
| Phf11 219131         | 2.031596688 | 0.219401834 | 3.072675697  | 0.141835809 |
| Dmrt2 226049         | 2.027466274 | 0.167836552 | 3.60514881   | 0.091113317 |
| Fam46c 74645         | 2.027073129 | 0.011325296 | 1.694444822  | 0.023649417 |
| Rec8 56739           | 2.024150909 | 0.093601779 | 1.870833456  | 0.036245303 |
| Zfp783 232785        | 2.023553939 | 0.225551501 | 6.955966667  | 0.093223255 |
| Hcfc2 67933          | 2.022887974 | 0.154570388 | 1.230196262  | 0.352308462 |
| Rps6ka3 110651       | 2.019317778 | 0.291320956 | 3.53972      | 0.173296754 |
| Stk17b 98267         | 2.019103495 | 0.063565696 | 1.570647002  | 0.123664554 |
| Zfp354c 30944        | 2.01324     | 0.20631898  | 5.0331       | 0.093589634 |
| Fgfbp1 14181         | 2.01324     | 0.20631898  | 5.0331       | 0.093589634 |
| Igfbp2 16008         | 2.011410149 | 0.00054602  | 2.038432205  | 0.000242094 |
| Psmc3ip 19183        | 2.007461557 | 0.14951805  | 3.698758657  | 0.065622006 |
| Card9 332579         | 2.006558598 | 0.113488165 | 2.223777971  | 0.072977175 |
| Ltc4s 17001          | 2.00462337  | 0.130683874 | 1.328223571  | 0.285396401 |
| 5031414D18Rik 271221 | 2.003003439 | 0.089832033 | 1.595068474  | 0.181975171 |
| Ly6a 110454          | 2.001552185 | 0.001163746 | 1.846822786  | 0.001629888 |
| Ncam2 17968          | 1.994377827 | 0.157329603 | 1.994377827  | 0.157329603 |
| Tfrc 22042           | 1.993922385 | 0.028426766 | 3.456360381  | 0.000034163 |
| Epn3 71889           | 1.99310854  | 0.147972076 | 1.99310854   | 0.147972076 |
| Slc37a1 224674       | 1.992835384 | 0.033178872 | 1.992835384  | 0.033178872 |
| Dgkh 380921          | 1.991124477 | 0.164149999 | 1.991124477  | 0.164149999 |
| Ap1m2 11768          | 1.990635056 | 0.235634918 | 1.656626026  | 0.330587367 |
| Prom1 19126          | 1.989109759 | 0.249775977 | -1.400394585 | 0.339887238 |
| 40977 216438         | 1.98906558  | 0.115531066 | 1.98906558   | 0.115531066 |
| Myof 226101          | 1.988642512 | 0.120980629 | 1.954657622  | 0.07924522  |
| AY512931 434310      | 1.98691199  | 0.173929923 | 3.519590809  | 0.093837856 |
| Dnali1 75563         | 1.985301171 | 0.286197212 | 1            | #DIV/0!     |
| Steap1 70358         | 1.985301171 | 0.286197212 | 1            | #DIV/0!     |
| Ubd 24108            | 1.985301171 | 0.286197212 | 1            | #DIV/0!     |
| Lcn13 227627         | 1.985301171 | 0.286197212 | 1            | #DIV/0!     |
| Lta 16992            | 1.985301171 | 0.286197212 | 1            | #DIV/0!     |
| BC051142 407788      | 1.985301171 | 0.286197212 | 1            | #DIV/0!     |
| Lysmd4 75099         | 1.980849033 | 0.012742687 | 2.274520969  | 0.000380822 |
| Mcts2 66405          | 1.980704072 | 0.012181779 | 2.49941426   | 0.003333406 |
| Cyp2b10 13088        | 1.97760177  | 0.020226082 | 2.25797696   | 0.002420754 |
| Pitx3 18742          | 1.974545455 | 0.231988449 | 6.7875       | 0.093349877 |
| Spata6 67946         | 1.974026667 | 0.302735013 | 1            | #DIV/0!     |
| 4632434I11Rik 74041  | 1.968463151 | 0.220449069 | 1.101858099  | 0.45752294  |
| E130309D14Rik 432582 | 1.968454166 | 0.158798979 | 1.968454166  | 0.158798979 |
| Rassf1 56289         | 1.967644374 | 0.006453285 | 2.09898358   | 0.000544821 |
| Rbp1 19659           | 1.967350955 | 0.058643857 | 1.914304262  | 0.030184113 |
| Tab3 66724           | 1.967215378 | 0.01890877  | 1.686124017  | 0.030737548 |
| Smpd3 58994          | 1.961678463 | 0.077461557 | 2.61305197   | 0.044159231 |
| Wdr96 70806          | 1.96083565  | 0.220136118 | 1.138603377  | 0.444164115 |
| Brip1 237911         | 1.960420074 | 0.168104463 | 1.960420074  | 0.168104463 |
| 4930538K18Rik 75180  | 1.960302262 | 0.178886823 | 3.472454672  | 0.096192094 |
| BC060267 212516      | 1.959346667 | 0.289264215 | 1            | #DIV/0!     |
| Spink5 72432         | 1.959346667 | 0.289264215 | 1            | #DIV/0!     |
| Dyx1c1 67685         | 1.959346667 | 0.289264215 | 1            | #DIV/0!     |
| Baalc 118452         | 1.959346667 | 0.289264215 | 1            | #DIV/0!     |
| Gm8580 667338        | 1.959346667 | 0.289264215 | 1            | #DIV/0!     |
| Ccl11 20292          | 1.959346667 | 0.289264215 | 1            | #DIV/0!     |

|                      |             |             |              |             |
|----------------------|-------------|-------------|--------------|-------------|
| Dnase1 13419         | 1.959346667 | 0.289264215 | 1            | #DIV/0!     |
| Fut7 14347           | 1.958999665 | 0.246712071 | 3.3          | 0.173296754 |
| Trim36 28105         | 1.958999665 | 0.246712071 | 3.3          | 0.173296754 |
| Zfp658 210104        | 1.953071829 | 0.175935369 | 1.150887417  | 0.405805975 |
| 3110007F17Rik 73061  | 1.951085134 | 0.235807493 | 6.7875       | 0.093349877 |
| Ints10 70885         | 1.950490713 | 0.096660172 | 1.950490713  | 0.096660172 |
| Dzip3 224170         | 1.9483722   | 0.155525754 | 2.019641377  | 0.144590241 |
| Muc4 140474          | 1.946241971 | 0.290847976 | 1            | #DIV/0!     |
| Itm2a 16431          | 1.946241971 | 0.290847976 | 1            | #DIV/0!     |
| Gm13275 545652       | 1.946241971 | 0.290847976 | 1            | #DIV/0!     |
| Pdzd4 245469         | 1.944437603 | 0.179571152 | 1.944437603  | 0.179571152 |
| Gpr137b 83924        | 1.942829125 | 0.209940218 | 1.023981074  | 0.486887059 |
| Slc9a5 277973        | 1.94175242  | 0.070019944 | 2.305650535  | 0.015335482 |
| Creb3l4 78284        | 1.938031143 | 0.188170772 | 3.905680448  | 0.086032803 |
| Ier5l 72500          | 1.937245201 | 0.118341906 | 3.268101674  | 0.041409704 |
| Jmjd5 77035          | 1.93668277  | 0.013257348 | 2.266295749  | 0.007863698 |
| Hspb1 15507          | 1.93544959  | 0.028378217 | 2.184202953  | 0.024927151 |
| 9130017N09Rik 78906  | 1.933503171 | 0.27032728  | -1.809413362 | 0.226028814 |
| Vpreb1 22362         | 1.933268044 | 0.247043309 | 1.656626026  | 0.330587367 |
| A330035P11Rik 319727 | 1.928883645 | 0.007868311 | 1.656124792  | 0.003106526 |
| Marveld3 73608       | 1.927876176 | 0.095452585 | 2.262623317  | 0.044965343 |
| Eid1 58521           | 1.925679661 | 0.019519075 | 1.925679661  | 0.019519075 |
| Ugt1a6a 94284        | 1.923739013 | 0.210679737 | -1.025878318 | 0.453827192 |
| Gadd45b 17873        | 1.92305936  | 0.002641501 | 2.065628744  | 0.00053833  |
| Itga10 213119        | 1.922457896 | 0.110645728 | 1.391465011  | 0.233856321 |
| Trove2 20822         | 1.922422757 | 0.112451801 | 1.922422757  | 0.112451801 |
| Tal1 21349           | 1.922113627 | 0.166705323 | 5.06877381   | 0.032065754 |
| Capn3 12335          | 1.916248261 | 0.133938064 | 2.870671244  | 0.07220323  |
| Il1a 16175           | 1.916180134 | 0.108370733 | 1.820487034  | 0.111036953 |
| Apol7b 278679        | 1.916037164 | 0.25914363  | 1            | #DIV/0!     |
| Fam198b 68659        | 1.912613584 | 0.304682484 | -4.016833333 | 0.093227909 |
| Txk 22165            | 1.912227017 | 0.208392139 | 7.842616667  | 0.040301615 |
| Cidec 14311          | 1.910994211 | 0.141016799 | 2.047605433  | 0.053903212 |
| Runx1 12394          | 1.905478734 | 0.032548491 | 2.567618806  | 0.000690233 |
| Hspa1b 15511         | 1.904566786 | 0.091060947 | 2.269347998  | 0.074324716 |
| Sh3tc2 225608        | 1.903617393 | 0.074881546 | 3.390054844  | 0.001362515 |
| Glt25d2 269132       | 1.902621674 | 0.077536435 | 2.257293357  | 0.01892472  |
| Lysmd1 217779        | 1.901497049 | 5.40958E-05 | 2.02109471   | 8.67866E-07 |
| Fosb 14282           | 1.900778191 | 0.14426159  | 1.394162681  | 0.290810988 |
| Ddit4 74747          | 1.899115409 | 0.053630163 | 1.523151917  | 0.099826314 |
| Tmem54 66260         | 1.895670226 | 0.313548122 | 1            | #DIV/0!     |
| Cnksr1 194231        | 1.894918071 | 0.241377687 | -1.174476973 | 0.420024314 |
| Zfp846 244721        | 1.892908801 | 0.178794118 | 1.892908801  | 0.178794118 |
| Tspan13 66109        | 1.892362268 | 0.114526768 | 1.126562206  | 0.376045493 |
| Fanca 14087          | 1.892337384 | 0.150358689 | 1.892337384  | 0.150358689 |
| Col8a1 12837         | 1.890470678 | 0.231884769 | -1.162638987 | 0.41190955  |
| Ddah2 51793          | 1.890232859 | 0.013703879 | 1.675390751  | 0.024971637 |
| Dcdc2c 68511         | 1.888041275 | 0.096070096 | 1.888041275  | 0.096070096 |
| 5730528L13Rik 66665  | 1.887852815 | 0.266293326 | -1.426573059 | 0.352378067 |
| 5430405H02Rik 74487  | 1.887684593 | 0.061937661 | 1.217042356  | 0.195139733 |
| Igfbp1 16006         | 1.886098867 | 0.130745046 | 1.925998776  | 0.103697721 |
| Siglech 233274       | 1.885254977 | 0.12510092  | 2.764166053  | 0.064647616 |
| Tbx21 57765          | 1.883833924 | 0.120575076 | 1.595428175  | 0.189013465 |

|                      |             |             |              |             |
|----------------------|-------------|-------------|--------------|-------------|
| Klf7 93691           | 1.882202326 | 0.14337754  | 3.192546191  | 0.056981832 |
| Myo9a 270163         | 1.880144888 | 0.089675214 | 2.247580254  | 0.022733228 |
| Cyp2d12 380997       | 1.873223624 | 0.085914719 | 1.955564114  | 0.064015483 |
| Uchl1 22223          | 1.86793095  | 0.265184327 | 1.282144901  | 0.403677687 |
| Cacna2d1 12293       | 1.867489037 | 0.239825307 | 3.320684524  | 0.155017867 |
| 1700084E18Rik 67350  | 1.867032963 | 0.128763403 | 1.867032963  | 0.128763403 |
| Tmsb15b1 666244      | 1.866970666 | 0.260477861 | 3.53972      | 0.173296754 |
| A530016L24Rik 319942 | 1.862740498 | 0.197405026 | 3.497505952  | 0.095363911 |
| Ehhadh 74147         | 1.861911261 | 0.05347085  | 2.178873156  | 0.040674574 |
| B430010I23Rik 78849  | 1.860139241 | 0.30187567  | 1            | #DIV/0!     |
| Dusp18 75219         | 1.851312328 | 0.254394939 | 6.955966667  | 0.093223255 |
| Kcna6 16494          | 1.851312328 | 0.254394939 | 6.955966667  | 0.093223255 |
| 4932412H11Rik 242838 | 1.850062673 | 0.083122889 | 1.525256151  | 0.168033467 |
| Zfp97 22759          | 1.849137617 | 0.115846707 | 2.684457243  | 0.036792832 |
| Spsb4 211949         | 1.845932937 | 0.16121437  | -1.103316447 | 0.330148753 |
| Tmprss7 208171       | 1.843836    | 0.322338549 | 1            | #DIV/0!     |
| Mcm6 17219           | 1.843785888 | 0.008928312 | 1.700296016  | 0.019195677 |
| Jhdm1d 338523        | 1.840651077 | 0.004745942 | 2.187984517  | 0.000968336 |
| Skp2 27401           | 1.839848893 | 0.2147503   | 1.510407341  | 0.324601155 |
| Tet3 194388          | 1.83638884  | 0.023662505 | 2.006477848  | 0.010864762 |
| Dclre1c 227525       | 1.833769191 | 0.042059703 | 2.683141734  | 0.001654843 |
| Lig4 319583          | 1.832544396 | 0.10940121  | 2.681593502  | 0.012429051 |
| Rufy4 435626         | 1.832047627 | 0.135357138 | 1.832047627  | 0.135357138 |
| Cd63 12512           | 1.830288376 | 0.027903065 | 1.886615748  | 0.036277974 |
| Ecm2 407800          | 1.829758324 | 0.133563277 | 1.269051753  | 0.292224207 |
| Clec3b 21922         | 1.828548408 | 0.258785711 | 7.1133       | 0.074643367 |
| Nid2 18074           | 1.827234954 | 0.090477552 | 1.455004478  | 0.186254313 |
| Med23 70208          | 1.82661756  | 0.028617177 | 2.519072422  | 0.002459056 |
| Ttc32 75516          | 1.826507951 | 0.005107483 | 1.938736061  | 0.00292119  |
| Cldn15 60363         | 1.819787048 | 0.215306112 | 3.618330576  | 0.10102568  |
| Gm14207 100043609    | 1.819718321 | 0.142478868 | 1.269700358  | 0.309313476 |
| Parp16 214424        | 1.816580892 | 0.011615038 | 1.569294186  | 0.009061054 |
| Snhg6 73824          | 1.814799478 | 0.01040376  | 1.408684724  | 0.022457994 |
| Rcan3 53902          | 1.814753172 | 0.162299917 | 1.18458007   | 0.365432505 |
| Zfp273 212569        | 1.814209841 | 0.246917908 | 3.223135008  | 0.156688344 |
| 4931428F04Rik 74356  | 1.813231469 | 0.162219399 | 2.429793257  | 0.112989565 |
| Prss57 73106         | 1.81110758  | 0.324261626 | 1            | #DIV/0!     |
| Zfp605 675812        | 1.809934083 | 0.183687906 | 1.809934083  | 0.183687906 |
| Arl6 56297           | 1.807544058 | 0.154461078 | 1.807544058  | 0.154461078 |
| Cyp2d9 13105         | 1.806977275 | 0.047225227 | 1.650674848  | 0.055279471 |
| Tnfrsf18 21936       | 1.806636712 | 0.200313113 | 1.18929412   | 0.403510819 |
| Psrc1 56742          | 1.806475366 | 0.261786747 | 6.7875       | 0.093349877 |
| Ccdc19 71870         | 1.806475366 | 0.261786747 | 6.7875       | 0.093349877 |
| Fam64a 109212        | 1.806475366 | 0.261786747 | 6.7875       | 0.093349877 |
| Spnb4 80297          | 1.806475366 | 0.261786747 | 6.7875       | 0.093349877 |
| Hspb11 72938         | 1.805956502 | 0.211816892 | 1.83139214   | 0.184075273 |
| Edn1 13614           | 1.805903505 | 0.088316047 | 1.182982474  | 0.302553007 |
| Col6a1 12833         | 1.80427886  | 0.001882042 | 1.802201697  | 0.000717476 |
| Pik3cb 74769         | 1.800031909 | 0.006084966 | 1.54867738   | 0.010268405 |
| Ovol1 18426          | 1.799334436 | 0.185076784 | 1.240252903  | 0.371501171 |
| Zfp821 75871         | 1.798982278 | 0.126234781 | 1.222081006  | 0.270544159 |
| Itgax 16411          | 1.798884543 | 0.225862309 | 1.812305732  | 0.263474441 |
| Epc2 227867          | 1.797572484 | 0.011232787 | 1.414889956  | 0.037499412 |



|                      |             |             |              |             |
|----------------------|-------------|-------------|--------------|-------------|
| Kcnj5 16521          | 1.795327656 | 0.316423918 | -3.967316667 | 0.09324139  |
| Lrrc8c 100604        | 1.793547681 | 0.06385905  | 1.183135955  | 0.208922724 |
| Mansc1 67729         | 1.792748372 | 0.077417935 | 2.812322306  | 0.002762728 |
| Ppp1r2-ps3 546723    | 1.792222246 | 0.217668718 | 1.154511099  | 0.426935518 |
| Ephb3 13845          | 1.791502058 | 0.11700592  | 1.791502058  | 0.11700592  |
| Chka 12660           | 1.790557051 | 0.064567217 | 1.429717899  | 0.020162251 |
| Ctnnbip1 67087       | 1.788661109 | 0.005185969 | 1.81772115   | 0.000586067 |
| Pkia 18767           | 1.787999197 | 0.274366994 | 1.264185714  | 0.40907038  |
| Sult1d1 53315        | 1.787167947 | 0.008315686 | 1.912031992  | 8.36347E-05 |
| A330023F24Rik 320977 | 1.786004684 | 0.071770901 | 2.921065285  | 0.004705172 |
| Ccna2 12428          | 1.785497074 | 0.157127453 | 2.176844107  | 0.127815782 |
| Stx1a 20907          | 1.784800511 | 0.172700259 | 1.703271258  | 0.125853994 |
| Msc 17681            | 1.784682105 | 0.250591835 | -1.066288814 | 0.470534859 |
| 4930544O15Rik 75173  | 1.783573733 | 0.261874253 | -1.075198276 | 0.470223483 |
| Mpzl1 68481          | 1.78306785  | 0.006096781 | 2.201680587  | 4.36302E-05 |
| Efemp1 216616        | 1.780261558 | 0.076158226 | 2.130996759  | 0.009842697 |
| ltga8 241226         | 1.779802277 | 0.182514258 | -1.089058757 | 0.37677266  |
| Pkib 18768           | 1.779258376 | 0.069126935 | 1.63781005   | 0.02260723  |
| Slc25a35 71998       | 1.77760003  | 0.12834542  | 1.77760003   | 0.12834542  |
| Galnt11 231050       | 1.777344437 | 0.034871659 | 1.484838724  | 0.072119937 |
| Efna2 13637          | 1.777182487 | 0.272033416 | 1.621721864  | 0.33676256  |
| Ear2 13587           | 1.775864738 | 0.131925283 | 1.775864738  | 0.131925283 |
| Oxct1 67041          | 1.774319356 | 0.100657983 | 1.367954468  | 0.210139847 |
| Fut2 14344           | 1.772921212 | 0.26552988  | 3.53972      | 0.173296754 |
| B930059L03Rik 319786 | 1.772921212 | 0.26552988  | 3.53972      | 0.173296754 |
| Pdgfd 71785          | 1.772921212 | 0.26552988  | 3.53972      | 0.173296754 |
| Stat4 20849          | 1.772921212 | 0.26552988  | 3.53972      | 0.173296754 |
| Gm17821 100316870    | 1.772290507 | 0.153902129 | 1.173255876  | 0.351135792 |
| Ric3 320360          | 1.77193439  | 0.273114192 | 1.633421429  | 0.334663434 |
| Hsd17b13 243168      | 1.770711074 | 0.001423228 | 1.58321934   | 0.001835554 |
| Agap2 216439         | 1.76854733  | 0.046418039 | 1.476148479  | 0.087568903 |
| Hic2 58180           | 1.768246968 | 0.01706697  | 2.436033584  | 0.000120424 |
| Slc5a3 53881         | 1.767457338 | 0.105301734 | 2.197988533  | 0.025066395 |
| Gata3 14462          | 1.766820878 | 0.228575886 | 10.8206      | 0.011663991 |
| 2410006H16Rik 69221  | 1.765657507 | 0.077881156 | 1.562107498  | 0.015306015 |
| Pcdhga1 93709        | 1.763475608 | 0.326873436 | 1            | #DIV/0!     |
| Col5a1 12831         | 1.762894969 | 0.008834558 | 1.934678399  | 0.000133289 |
| Btg2 12227           | 1.762318164 | 0.144433555 | 2.017209207  | 0.009939599 |
| 2610035D17Rik 72386  | 1.760992284 | 0.074786241 | 3.148286877  | 0.000611846 |
| Lmod3 320502         | 1.760917905 | 0.144112669 | 1.912093547  | 0.123041915 |
| Slc12a8 171286       | 1.757751544 | 0.171115474 | 1.146381847  | 0.387961247 |
| Nudt21 68219         | 1.757170488 | 0.015460604 | 1.735276099  | 0.00141261  |
| H2-Ob 15002          | 1.756074819 | 0.213104934 | 1.672705826  | 0.268647481 |
| Angptl7 654812       | 1.753784568 | 0.161531694 | 2.794105545  | 0.068038367 |
| Cenph 26886          | 1.751856465 | 0.269870644 | 3.53972      | 0.173296754 |
| 2610020H08Rik 434234 | 1.74864438  | 0.150037751 | 1.74864438   | 0.150037751 |
| Fbxl16 214931        | 1.748510801 | 0.167672588 | 3.685770001  | 0.008344521 |
| Cd209b 69165         | 1.747952614 | 0.318935971 | 3.3          | 0.173296754 |
| Zfp451 98403         | 1.747783013 | 0.062198589 | 1.747783013  | 0.062198589 |
| Zfp959 224893        | 1.742218307 | 0.047531538 | 1.568345932  | 0.087102845 |
| Rasal1 19415         | 1.741806123 | 0.210784685 | -1.022983438 | 0.482344907 |
| Emcn 59308           | 1.74138881  | 0.033108366 | 1.575025606  | 0.064344019 |
| Ush1g 16470          | 1.741055127 | 0.166435849 | -1.050596242 | 0.448492769 |

|                      |             |             |              |             |
|----------------------|-------------|-------------|--------------|-------------|
| Kifc1 100042970      | 1.740651071 | 0.169005504 | 2.841706696  | 0.068706115 |
| Prf1 18646           | 1.739962815 | 0.223787884 | 1.161797284  | 0.423418494 |
| Nhlrc1 105193        | 1.739883241 | 0.092224062 | 2.407124419  | 0.032735318 |
| Gins2 272551         | 1.739656996 | 0.197232994 | 2.794941181  | 0.102756446 |
| Abhd10 213012        | 1.738235227 | 0.013335056 | 1.575073231  | 0.029166502 |
| Ptpdc1 218232        | 1.737793143 | 0.127591068 | 2.452384709  | 0.058602847 |
| Krt23 94179          | 1.737114812 | 0.131235988 | 1.737114812  | 0.131235988 |
| Lzic 69151           | 1.737090033 | 0.002955914 | 1.976369559  | 0.00077934  |
| Col4a2 12827         | 1.736979094 | 2.13639E-05 | 1.821740748  | 2.16022E-05 |
| Fam186b 545136       | 1.736676989 | 0.334571441 | 1            | #DIV/0!     |
| Cks2 66197           | 1.735700168 | 0.10561465  | 1.763947743  | 0.037253545 |
| C1galt1c1 59048      | 1.735590156 | 0.000279736 | 1.907986483  | 6.42354E-05 |
| Cdy12 75796          | 1.733716803 | 0.15360861  | 2.483012638  | 0.020371565 |
| Ramp3 56089          | 1.732294275 | 0.181885827 | 1.843195698  | 0.110966406 |
| Tnni2 21953          | 1.731704079 | 0.251125963 | 1.731704079  | 0.251125963 |
| Nfe2 18022           | 1.730130982 | 0.290244161 | 1.195314368  | 0.428478238 |
| Rarres1 109222       | 1.730100691 | 0.026798247 | 2.380697793  | 3.11289E-05 |
| Dll1 13388           | 1.729578131 | 0.010637865 | 1.729578131  | 0.010637865 |
| Cyb5r1 72017         | 1.729551784 | 0.003858571 | 1.435813019  | 0.000958772 |
| Dbdd2 52840          | 1.726938418 | 0.011919613 | 1.529651904  | 0.025648072 |
| Lrdd 57913           | 1.726065198 | 0.163097076 | 2.35528214   | 0.062278499 |
| 2310004N24Rik 69535  | 1.725196086 | 0.100782864 | 1.108633165  | 0.287286593 |
| Cd300lf 246746       | 1.724785363 | 0.00056329  | 1.928470282  | 7.94367E-05 |
| Col1a1 12842         | 1.721825668 | 0.045244534 | 1.299759363  | 0.152217594 |
| Sash3 74131          | 1.721021135 | 0.068593456 | 1.301826224  | 0.053890885 |
| Smarca5-ps 545700    | 1.719804593 | 0.009727439 | 1.719804593  | 0.009727439 |
| Cenpk 60411          | 1.71937522  | 0.291968926 | 1.178571429  | 0.43416     |
| Shisa4 77552         | 1.71937522  | 0.291968926 | 1.178571429  | 0.43416     |
| Kcnab2 16498         | 1.718469773 | 0.121030551 | 1.329766625  | 0.251485966 |
| Accn5 58170          | 1.716352782 | 0.002090329 | 1.439185911  | 0.003522238 |
| Ckap2 80986          | 1.714807273 | 0.277582289 | 3.3          | 0.173296754 |
| Dpysl3 22240         | 1.714807273 | 0.277582289 | 3.3          | 0.173296754 |
| Dnmt3a 13435         | 1.71383065  | 0.001354634 | 1.785844441  | 0.000201942 |
| Tmem80 71448         | 1.713764996 | 0.022986222 | 1.562325511  | 0.046984063 |
| D630032N06Rik 654810 | 1.713717165 | 0.147843662 | 4.055582598  | 0.000652268 |
| Fam83g 69640         | 1.711561302 | 0.018996389 | 1.711561302  | 0.018996389 |
| Ccdc106 232821       | 1.711147256 | 0.058010461 | 2.149159003  | 0.023422073 |
| Pcdhb16 93887        | 1.710854104 | 0.254378817 | 1.710854104  | 0.254378817 |
| Bfsp2 107993         | 1.710854104 | 0.254378817 | 1.710854104  | 0.254378817 |
| 4930579G22Rik 69034  | 1.710536334 | 0.267667343 | -1.207318182 | 0.410710794 |
| Adam8 11501          | 1.710536334 | 0.267667343 | -1.207318182 | 0.410710794 |
| Vangl2 93840         | 1.710384512 | 0.290156517 | 3.53972      | 0.173296754 |
| Serpnb6b 20708       | 1.710214518 | 0.11028437  | 3.298156346  | 0.000197535 |
| Fbxl22 74165         | 1.710162403 | 0.16328143  | 1.183427785  | 0.358411948 |
| Ccdc138 76138        | 1.709700266 | 0.028334413 | 2.236112773  | 0.001490233 |
| Slc9a7 236727        | 1.709491575 | 0.231419597 | 2.115242794  | 0.199265129 |
| Exd1 241624          | 1.709462987 | 0.227036993 | 1.072515922  | 0.460982508 |
| Tmem29 382245        | 1.708618854 | 0.141213054 | 1.43902314   | 0.178969994 |
| Cybrd1 73649         | 1.707492233 | 0.244198189 | 1.022371059  | 0.488874049 |
| Wdr86 269633         | 1.706194715 | 0.22539027  | 1.706194715  | 0.22539027  |
| Btbd11 74007         | 1.705274093 | 0.184911255 | 1.705274093  | 0.184911255 |
| Srrm4 68955          | 1.704100317 | 0.059954125 | 1.952395527  | 0.044373009 |
| Gcnt1 14537          | 1.703625617 | 0.255866169 | 1.703625617  | 0.255866169 |

|                      |             |             |             |             |
|----------------------|-------------|-------------|-------------|-------------|
| Smok3a 545814        | 1.703625617 | 0.255866169 | 1.703625617 | 0.255866169 |
| Dnahc1 110084        | 1.703430269 | 0.278007657 | 3.53972     | 0.173296754 |
| Wt1 22431            | 1.703430269 | 0.278007657 | 3.53972     | 0.173296754 |
| Pi15 94227           | 1.703430269 | 0.278007657 | 3.53972     | 0.173296754 |
| Grap2 17444          | 1.7         | 0.339818682 | 1           | #DIV/0!     |
| Gnpda2 67980         | 1.699387637 | 0.126068259 | 1.428674132 | 0.208987186 |
| Ankrd9 74251         | 1.699176302 | 0.093758255 | 1.95642891  | 0.074601532 |
| Mbip 217588          | 1.69899193  | 0.161947626 | 1.218406139 | 0.342702781 |
| Hs3st1 15476         | 1.695730498 | 0.34062582  | 1           | #DIV/0!     |
| Prr18 320111         | 1.694433    | 0.282056419 | 3.3         | 0.173296754 |
| Mbd4 17193           | 1.694012395 | 0.212697946 | 1.821115418 | 0.200948525 |
| Vcam1 22329          | 1.693944121 | 0.023511608 | 1.488706307 | 0.042004168 |
| Pms2 18861           | 1.6935719   | 0.052516991 | 1.440002085 | 0.105258322 |
| Pigf 18701           | 1.692938638 | 0.156907336 | 1.085655529 | 0.377576123 |
| Tmem206 66950        | 1.692498016 | 0.085943141 | 1.311504657 | 0.167144999 |
| Rad54b 623474        | 1.690479956 | 0.174340794 | 2.97593794  | 0.049958104 |
| Slc7a10 53896        | 1.690137306 | 0.203690447 | 1.386923112 | 0.166845771 |
| Gm13315 625342       | 1.68976391  | 0.258744163 | 1.68976391  | 0.258744163 |
| C5ar1 12273          | 1.687817161 | 0.081243525 | 1.290873716 | 0.135833757 |
| Airn 104103          | 1.68717619  | 0.247310324 | 2.628480853 | 0.116118185 |
| Nanp 67311           | 1.686355938 | 0.02405028  | 1.507505494 | 0.047992762 |
| Atp1a3 232975        | 1.685024599 | 0.083236902 | 1.685024599 | 0.083236902 |
| Wdr54 75659          | 1.684117565 | 0.165443657 | 1.684117565 | 0.165443657 |
| Dip2a 64451          | 1.682825195 | 0.066415187 | 1.682825195 | 0.066415187 |
| Insig2 72999         | 1.682129121 | 0.019839264 | 1.540656675 | 0.041351494 |
| Elov17 74559         | 1.6819329   | 0.079951444 | 1.6819329   | 0.079951444 |
| A330069E16Rik 606735 | 1.680274376 | 0.171521126 | 1.118080797 | 0.394830313 |
| Syt6 54524           | 1.675322584 | 0.20855111  | 1.542129164 | 0.275963748 |
| Cd48 12506           | 1.673950796 | 0.168670083 | 3.685421333 | 0.005826323 |
| Tgif1 21815          | 1.672893046 | 0.016903457 | 1.842750691 | 0.0031074   |
| E130012A19Rik 103551 | 1.672072696 | 0.013036737 | 1.549040332 | 0.002105175 |
| Tmem146 106757       | 1.671238691 | 0.165596091 | 2.147528101 | 0.112038532 |
| Slc8a3 110893        | 1.670918023 | 0.154260638 | 1.670918023 | 0.154260638 |
| Atad2b 320817        | 1.669917167 | 0.049286721 | 1.914344735 | 0.033015476 |
| Tnnc1 21924          | 1.669137207 | 0.168789764 | 1.801115536 | 0.140617952 |
| Erp29 67397          | 1.668462013 | 0.003901476 | 1.536803774 | 0.005588999 |
| Krr1 52705           | 1.667167849 | 0.026937062 | 1.716725195 | 0.005058466 |
| Usp11 236733         | 1.666712393 | 0.094188072 | 1.435338308 | 0.181910264 |
| Rab36 76877          | 1.666496373 | 0.045681388 | 2.044672393 | 0.016290145 |
| Dync2li1 213575      | 1.66518265  | 0.234308448 | 1.02476681  | 0.485703619 |
| Neu3 50877           | 1.663177059 | 0.036498129 | 2.062716556 | 0.008987374 |
| Wdhd1 218973         | 1.662844164 | 0.285085214 | 1.446634395 | 0.37940868  |
| Sh3pxd2b 268396      | 1.662281413 | 0.10592893  | 2.164525682 | 0.049243938 |
| Pdgfra 18595         | 1.661502139 | 0.053168492 | 1.924325303 | 0.00574447  |
| Epcam 17075          | 1.658917542 | 0.08667398  | 2.359416025 | 0.003884268 |
| Hbb-b1 15129         | 1.658808621 | 0.171135035 | 1.05586455  | 0.427938081 |
| Pim2 18715           | 1.658251384 | 0.019006746 | 1.780601518 | 0.009386387 |
| Raet1e 379043        | 1.65803139  | 0.16978345  | 1.965652706 | 0.113942275 |
| Ng23 78376           | 1.657400179 | 0.279682712 | 10.68586667 | 0.03955673  |
| Cyth3 19159          | 1.65722947  | 0.002042493 | 1.561350672 | 0.003935428 |
| 2810030E01Rik 72668  | 1.656308014 | 0.234924922 | 4.996574711 | 0.015247526 |
| Rab30 75985          | 1.655995849 | 0.006425989 | 1.655995849 | 0.006425989 |
| Pygm 19309           | 1.655458762 | 0.19544163  | 2.511424773 | 0.098401738 |

|                      |             |             |              |             |
|----------------------|-------------|-------------|--------------|-------------|
| Plp1 18823           | 1.65496306  | 0.293997646 | 6.7875       | 0.093349877 |
| 2810021B07Rik 66308  | 1.654770698 | 0.013962365 | 1.562543792  | 0.005172639 |
| 2410137F16Rik 76798  | 1.65311698  | 0.049677617 | 1.823515109  | 0.000534107 |
| Wipi1 52639          | 1.649950383 | 0.027026089 | 2.127702102  | 0.000140678 |
| Egr3 13655           | 1.646006803 | 0.290703755 | 3.3          | 0.173296754 |
| B3galt6 117592       | 1.643935222 | 0.017913926 | 1.669474221  | 0.00601375  |
| 4933421E11Rik 321000 | 1.643668916 | 0.139795695 | 2.811726142  | 0.016368122 |
| Zfp449 78619         | 1.642434197 | 0.304308741 | 1.264185714  | 0.40907038  |
| Zfp40 22700          | 1.641908034 | 0.186520531 | 2.562985067  | 0.078656243 |
| Armcx5 494468        | 1.641726912 | 0.133000759 | 1.956941884  | 0.041573613 |
| S100a9 20202         | 1.639865273 | 0.205082172 | 2.25638843   | 0.131729559 |
| Pdgfb 18591          | 1.639785943 | 0.117553031 | 1.297355082  | 0.244620616 |
| Dnal1 105000         | 1.638835762 | 0.286085794 | -1.591089844 | 0.221834324 |
| Wwtr1 97064          | 1.637902241 | 0.023253166 | 1.801856214  | 0.00559497  |
| 4933430H15Rik 74485  | 1.637634894 | 0.354082855 | -5.925       | 0.173296754 |
| 40969 72925          | 1.63757504  | 0.317334291 | -2.305926269 | 0.163045149 |
| AU018091 245128      | 1.635608    | 0.307092358 | 3.3          | 0.173296754 |
| Ccdc39 51938         | 1.635249119 | 0.330786619 | 1            | #DIV/0!     |
| Dpysl2 12934         | 1.635219745 | 0.093746883 | 1.635219745  | 0.093746883 |
| Chic2 74277          | 1.634456015 | 0.054750552 | 1.376056289  | 0.105309207 |
| Lepre1 56401         | 1.634419673 | 0.001742034 | 1.634419673  | 0.001742034 |
| Pot1a 101185         | 1.634302801 | 0.017722571 | 1.416974326  | 0.034758524 |
| Alg11 207958         | 1.631288237 | 0.099144374 | 1.776843013  | 0.069860994 |
| Tdg 21665            | 1.631250763 | 0.0003055   | 1.851294875  | 9.40261E-06 |
| Plagl1 22634         | 1.630344615 | 0.280842618 | 17.66206667  | 0.013575129 |
| Csad 246277          | 1.629664286 | 0.046941103 | 1.85112938   | 0.007702907 |
| 5330426P16Rik 68190  | 1.629620238 | 0.083456989 | 1.256503542  | 0.135659571 |
| Chsy3 78923          | 1.627568608 | 0.090868264 | 1.125571103  | 0.331498439 |
| Ampd3 11717          | 1.625667229 | 0.11320683  | 2.690317436  | 0.001913164 |
| Brsk1 381979         | 1.622981059 | 0.281827988 | 2.416498236  | 0.177579722 |
| Yy2 100073351        | 1.622191011 | 0.338059472 | 1            | #DIV/0!     |
| Ccdc136 232664       | 1.62201305  | 0.299045994 | 3.53972      | 0.173296754 |
| Top2a 21973          | 1.62201305  | 0.299045994 | 3.53972      | 0.173296754 |
| Spef1 70997          | 1.621861073 | 0.079702089 | 1.156735878  | 0.254705091 |
| Nid1 18073           | 1.62092155  | 0.025165198 | 2.032004612  | 0.001891444 |
| Cd93 17064           | 1.620481641 | 0.013355103 | 1.834817538  | 0.005442019 |
| Ripply1 622473       | 1.620006918 | 0.109418172 | 2.482791777  | 0.00478219  |
| Ms4a6b 69774         | 1.619123801 | 0.215488456 | 1.034552071  | 0.474591385 |
| B930041F14Rik 230991 | 1.61804507  | 0.129623833 | 1.92939465   | 0.035965247 |
| Sowahc 268301        | 1.617891915 | 0.103755829 | 1.617891915  | 0.103755829 |
| Dnm1 13429           | 1.617232416 | 0.168687387 | 1.368976929  | 0.2586574   |
| Ccnb1 268697         | 1.615943179 | 0.303199473 | 6.7875       | 0.093349877 |
| Dusp5 240672         | 1.614646679 | 0.282028388 | 3.280483654  | 0.135584145 |
| Klhl23 277396        | 1.614003622 | 0.119958136 | 1.924575533  | 0.027838627 |
| Neil2 382913         | 1.613822526 | 0.204946328 | 1.150188264  | 0.403957413 |
| N28178 230085        | 1.612968336 | 0.286060305 | 1.656626026  | 0.330587367 |
| C1qtnf3 81799        | 1.612271091 | 0.329399618 | 1            | #DIV/0!     |
| Enkur 71233          | 1.612271091 | 0.329399618 | 1            | #DIV/0!     |
| Pate2 330921         | 1.612271091 | 0.329399618 | 1            | #DIV/0!     |
| Naa11 97243          | 1.612271091 | 0.329399618 | 1            | #DIV/0!     |
| AI854703 243373      | 1.612271091 | 0.329399618 | 1            | #DIV/0!     |
| 6330403A02Rik 381310 | 1.612271091 | 0.329399618 | 1            | #DIV/0!     |
| 4930539J05Rik 319587 | 1.612271091 | 0.329399618 | 1            | #DIV/0!     |

|                      |             |             |              |             |
|----------------------|-------------|-------------|--------------|-------------|
| Ddx25 30959          | 1.612271091 | 0.329399618 | 1            | #DIV/0!     |
| Cryba4 12959         | 1.612271091 | 0.329399618 | 1            | #DIV/0!     |
| Dnajb13 69387        | 1.612271091 | 0.329399618 | 1            | #DIV/0!     |
| Sfrp4 20379          | 1.612271091 | 0.329399618 | 1            | #DIV/0!     |
| Zfp353 234203        | 1.612271091 | 0.329399618 | 1            | #DIV/0!     |
| Bst1 12182           | 1.612271091 | 0.329399618 | 1            | #DIV/0!     |
| Stc2 20856           | 1.612271091 | 0.329399618 | 1            | #DIV/0!     |
| Bicd1 12121          | 1.612271091 | 0.329399618 | 1            | #DIV/0!     |
| Celf3 78784          | 1.612271091 | 0.329399618 | 1            | #DIV/0!     |
| D630042P16Rik 243612 | 1.612271091 | 0.329399618 | 1            | #DIV/0!     |
| E230008N13Rik 381522 | 1.612271091 | 0.329399618 | 1            | #DIV/0!     |
| 4930486L24Rik 214639 | 1.610299403 | 0.24916252  | 3.286172748  | 0.091708258 |
| Ablim2 231148        | 1.609464281 | 0.064952026 | 1.863579639  | 0.008588502 |
| Dcakd 68087          | 1.609446259 | 0.000143569 | 1.476339825  | 3.01731E-05 |
| Gulp1 70676          | 1.609028219 | 0.242591433 | 2.86110119   | 0.109735813 |
| Nrg4 83961           | 1.608617475 | 0.012856647 | 1.608617475  | 0.012856647 |
| Atr 245000           | 1.608331881 | 0.165536819 | 1.159746679  | 0.360352085 |
| Myadm 50918          | 1.608086824 | 0.023359229 | 1.455713508  | 0.049074279 |
| Pus7l 78895          | 1.607172561 | 0.066179081 | 1.752046554  | 0.017436041 |
| Gm14430 627914       | 1.606469787 | 0.273142306 | 4.265682105  | 0.084695435 |
| Sesn3 75747          | 1.606390303 | 0.186819853 | 1.938834203  | 0.145831587 |
| Opn3 13603           | 1.605987021 | 0.201435558 | 2.26552607   | 0.114826986 |
| Ctsf 56464           | 1.605984493 | 0.000355363 | 1.426465138  | 0.000260911 |
| D030056L22Rik 225995 | 1.605594909 | 0.094715339 | 2.689412067  | 0.000348772 |
| P2ry14 140795        | 1.605590687 | 0.175073558 | 1.605590687  | 0.175073558 |
| Gm4841 225594        | 1.605445423 | 0.119479619 | 1.276859448  | 0.248987319 |
| 1700021C14Rik 76927  | 1.605164826 | 0.161675246 | 1.605164826  | 0.161675246 |
| Nasp 50927           | 1.604128761 | 0.003901397 | 1.71822512   | 0.00298969  |
| Lama2 16773          | 1.603533792 | 0.171647025 | 1.603533792  | 0.171647025 |
| Gm3230 100041244     | 1.603410186 | 0.1908988   | 1.603410186  | 0.1908988   |
| Eif3j 78655          | 1.602958309 | 0.006995331 | 1.839362787  | 0.001126859 |
| Dusp22 105352        | 1.602626874 | 0.002739512 | 1.518785601  | 0.005855771 |
| Retnlg 245195        | 1.60073399  | 0.252065169 | 3.286172748  | 0.091708258 |
| Zfp472 224691        | 1.599960359 | 0.232411893 | 1.599960359  | 0.232411893 |
| Gas2l3 237436        | 1.599272212 | 0.057190988 | 1.184722635  | 0.161224317 |
| Smoc2 64074          | 1.599246733 | 0.040753925 | 1.95887898   | 0.009648713 |
| Ccbp2 59289          | 1.599205728 | 0.127719482 | 1.599205728  | 0.127719482 |
| 1810011H11Rik 69069  | 1.599096849 | 0.260571911 | -1.058006311 | 0.468991309 |
| Id4 15904            | 1.598845597 | 0.162066484 | 1.598845597  | 0.162066484 |
| Spa17 20686          | 1.598651823 | 0.247926028 | -1.037466066 | 0.477413445 |
| D16Ert472e 67102     | 1.598422055 | 0.007726001 | 1.598422055  | 0.007726001 |
| Tmem194b 227094      | 1.598214999 | 0.284206304 | 5.191177856  | 0.074944339 |
| Nedd1 17997          | 1.596600817 | 0.115474362 | 1.264206874  | 0.243064343 |
| Hist2h3c2-ps 97114   | 1.594619687 | 0.218656718 | 2.925783386  | 0.067209103 |
| Fcrla 98752          | 1.594344022 | 0.12711092  | 2.618395089  | 0.003831982 |
| Gabpb1 14391         | 1.592773053 | 0.00614252  | 1.439893325  | 0.012161006 |
| Fam134b 66270        | 1.592536899 | 0.067561217 | 1.471544529  | 0.066667248 |
| 6530418L21Rik 109050 | 1.592473714 | 0.224462127 | 2.95373508   | 0.071577527 |
| Cyp2c67 545288       | 1.591918179 | 0.007090146 | 1.601646286  | 0.001884363 |
| Lancl1 14768         | 1.591471844 | 0.002388913 | 1.665682536  | 0.001298225 |
| D430020J02Rik 319545 | 1.591193333 | 0.333510192 | 1            | #DIV/0!     |
| Bcl2l15 229672       | 1.591193333 | 0.333510192 | 1            | #DIV/0!     |
| Pif1 208084          | 1.591193333 | 0.333510192 | 1            | #DIV/0!     |

|                      |             |             |             |             |
|----------------------|-------------|-------------|-------------|-------------|
| Srpk3 56504          | 1.591193333 | 0.333510192 | 1           | #DIV/0!     |
| 4932418E24Rik 329366 | 1.591193333 | 0.333510192 | 1           | #DIV/0!     |
| Tmem45a 56277        | 1.591193333 | 0.333510192 | 1           | #DIV/0!     |
| Chl1 12661           | 1.591193333 | 0.333510192 | 1           | #DIV/0!     |
| Sprr2b 20756         | 1.591193333 | 0.333510192 | 1           | #DIV/0!     |
| Gpm6b 14758          | 1.591193333 | 0.333510192 | 1           | #DIV/0!     |
| Ckmt1 12716          | 1.591193333 | 0.333510192 | 1           | #DIV/0!     |
| Gng8 14709           | 1.591193333 | 0.333510192 | 1           | #DIV/0!     |
| Slc23a3 22626        | 1.591193333 | 0.333510192 | 1           | #DIV/0!     |
| Dcx 13193            | 1.591193333 | 0.333510192 | 1           | #DIV/0!     |
| Tll1 21892           | 1.591193333 | 0.333510192 | 1           | #DIV/0!     |
| Zcchc5 213436        | 1.591193333 | 0.333510192 | 1           | #DIV/0!     |
| Nup210 54563         | 1.590926934 | 0.005163037 | 1.914753749 | 0.000133265 |
| Ppm1h 319468         | 1.590665639 | 0.057227654 | 2.148649147 | 0.003543931 |
| Fam72a 108900        | 1.590446028 | 0.31730025  | 1.170129778 | 0.437059136 |
| Jag2 16450           | 1.589790083 | 0.290294141 | 1.621721864 | 0.33676256  |
| Cerk 223753          | 1.588946837 | 0.044856175 | 1.3860525   | 0.08897764  |
| Gprin3 243385        | 1.587447821 | 0.201069479 | 2.277317959 | 0.10591002  |
| Snupn 66069          | 1.587309293 | 0.023059387 | 1.747241268 | 0.004350286 |
| Tmem116 77462        | 1.586550029 | 0.14557918  | 1.156464707 | 0.325969498 |
| B3galnt1 26879       | 1.585600248 | 0.247540931 | 2.840724964 | 0.108233825 |
| Morc4 75746          | 1.58488368  | 0.06677429  | 1.155106376 | 0.251654237 |
| Klhdc3 71765         | 1.581859358 | 0.014515732 | 1.407203286 | 0.016919528 |
| Rps6ka5 73086        | 1.581674262 | 0.293285717 | 1.561221429 | 0.345871498 |
| Mier3 218613         | 1.581373308 | 0.113823035 | 1.894277172 | 0.017593478 |
| Hapln1 12950         | 1.580550957 | 0.335626927 | 1           | #DIV/0!     |
| Ak8 68870            | 1.580550957 | 0.335626927 | 1           | #DIV/0!     |
| 2010015L04Rik 544678 | 1.580550957 | 0.335626927 | 1           | #DIV/0!     |
| Glb1l2 244757        | 1.580550957 | 0.335626927 | 1           | #DIV/0!     |
| Nudt11 58242         | 1.580550957 | 0.335626927 | 1           | #DIV/0!     |
| Cxcr2 12765          | 1.580550957 | 0.335626927 | 1           | #DIV/0!     |
| Fsd1l 319636         | 1.580550957 | 0.335626927 | 1           | #DIV/0!     |
| Pcdhb14 93885        | 1.580550957 | 0.335626927 | 1           | #DIV/0!     |
| Hes7 84653           | 1.580550957 | 0.335626927 | 1           | #DIV/0!     |
| Fasl 14103           | 1.580550957 | 0.335626927 | 1           | #DIV/0!     |
| Optc 269120          | 1.580550957 | 0.335626927 | 1           | #DIV/0!     |
| Slc4a10 94229        | 1.580550957 | 0.335626927 | 1           | #DIV/0!     |
| P2rx6 18440          | 1.580550957 | 0.335626927 | 1           | #DIV/0!     |
| Ly86 17084           | 1.580239076 | 0.08482527  | 1.861862536 | 0.01425558  |
| Gjc3 118446          | 1.579920553 | 0.07632588  | 1.312006845 | 0.154570709 |
| 2410022L05Rik 66423  | 1.57788623  | 0.120627201 | 1.57788623  | 0.120627201 |
| Gabrr2 14409         | 1.577176088 | 0.30820807  | 3.53972     | 0.173296754 |
| Dnd1 213236          | 1.575613358 | 0.198628813 | 2.516108079 | 0.07074333  |
| Hoxa5 15402          | 1.575490549 | 0.269689825 | 1.492617986 | 0.321647633 |
| Fdxacb1 382137       | 1.574961386 | 0.078665184 | 1.42116787  | 0.147901136 |
| Sestd1 228071        | 1.57430781  | 0.252213203 | 1.192147174 | 0.369163595 |
| Gpx7 67305           | 1.573831363 | 0.082496685 | 1.43010164  | 0.150824899 |
| 1700030K09Rik 72254  | 1.572678536 | 0.080601178 | 1.572678536 | 0.080601178 |
| ltga11 319480        | 1.572421054 | 0.300720352 | 3.327242993 | 0.08214779  |
| Dtna 13527           | 1.572179196 | 0.301935514 | 3.422055173 | 0.136421656 |
| Gt(ROSA)26Sor 14910  | 1.571768582 | 0.147996493 | 2.132183595 | 0.06274425  |
| Lyz2 17105           | 1.571066609 | 0.020978591 | 1.360990167 | 0.014562262 |
| Calr4 108802         | 1.570778182 | 0.352322708 | 1           | #DIV/0!     |

|                         |             |             |              |             |
|-------------------------|-------------|-------------|--------------|-------------|
| Cox6b2 333182           | 1.570358496 | 0.23182545  | -1.088200321 | 0.423395033 |
| 9130019P16Rik 100042056 | 1.570256579 | 0.337701205 | 1            | #DIV/0!     |
| Foxq1 15220             | 1.570175412 | 0.041192701 | 2.145683924  | 0.001199667 |
| 1600002K03Rik 69770     | 1.56985325  | 0.007767184 | 1.644830435  | 0.001568458 |
| Slc7a4 224022           | 1.56965119  | 0.249730179 | -1.092720178 | 0.438525627 |
| Hmgb2 97165             | 1.568599541 | 0.03865003  | 1.4512837    | 0.004966728 |
| Tmem88b 320587          | 1.567918006 | 0.142613859 | 1.877702539  | 0.038067883 |
| H2-BI 14963             | 1.566738995 | 0.281967429 | 1.093820762  | 0.456057209 |
| Tctn1 654470            | 1.565884542 | 0.141154224 | 2.849911855  | 0.002551325 |
| Gfpt2 14584             | 1.565732637 | 0.177085292 | 1.565732637  | 0.177085292 |
| Rfc5 72151              | 1.56369916  | 0.026287288 | 1.56369916   | 0.026287288 |
| Tomm20 67952            | 1.562911843 | 0.005730443 | 1.465093774  | 0.013306094 |
| Frat2 212398            | 1.562817387 | 0.015008263 | 1.938019809  | 5.19821E-05 |
| Btdb10 68815            | 1.562718128 | 0.110105921 | 1.554503445  | 0.01407623  |
| Vash1 238328            | 1.562314689 | 0.179042935 | 2.502290241  | 0.045014704 |
| Gjc2 118454             | 1.562108025 | 0.14243572  | 1.562108025  | 0.14243572  |
| Il7r 16197              | 1.561689375 | 0.319149176 | 1.264185714  | 0.40907038  |
| Arhgef10 234094         | 1.561174097 | 0.081170525 | 2.355225044  | 0.000294116 |
| Rasl11a 68895           | 1.560918253 | 0.263471521 | -1.021117677 | 0.48843767  |
| Nbl1 17965              | 1.560616914 | 0.224123569 | 1.560616914  | 0.224123569 |
| 0610010012Rik 66060     | 1.559585688 | 0.013424795 | 1.411261452  | 0.028579683 |
| Dnajb5 56323            | 1.559465084 | 0.070041396 | 1.329946116  | 0.142902753 |
| Prkra 23992             | 1.559429544 | 0.084471454 | 1.538733998  | 0.055104923 |
| Tbc1d9 71310            | 1.558043053 | 0.169975312 | 1.558043053  | 0.169975312 |
| Syn3 27204              | 1.558033426 | 0.060014449 | 1.733225681  | 0.020325823 |
| Ly6c2 100041546         | 1.556760423 | 0.302448095 | -1.413112558 | 0.336046301 |
| Fabp4 11770             | 1.555888027 | 0.130996482 | 1.633621918  | 0.088940405 |
| Trim30b 244183          | 1.55578618  | 0.298658649 | 1.550039004  | 0.34809122  |
| Uck2 80914              | 1.555534351 | 0.013009059 | 1.402923563  | 0.018157915 |
| Lgi3 213469             | 1.555052675 | 0.342162404 | 1.170129778  | 0.437059136 |
| Mitf 17342              | 1.554501312 | 0.154793217 | 2.659005118  | 0.006003288 |
| Rprd1a 225283           | 1.553921026 | 0.019442125 | 1.553921026  | 0.019442125 |
| Pacrgl 66768            | 1.553752432 | 0.151815086 | 1.559325676  | 0.129875028 |
| Snx8 231834             | 1.553603244 | 0.003666477 | 1.581292096  | 0.001339715 |
| Fam73a 215708           | 1.553110455 | 0.009704595 | 1.669422325  | 0.001839827 |
| Msh5 17687              | 1.552285189 | 0.300408339 | 1.202941586  | 0.406502778 |
| Col9a3 12841            | 1.552115173 | 0.355818567 | 1            | #DIV/0!     |
| Grip2 243547            | 1.552115173 | 0.355818567 | 1            | #DIV/0!     |
| Spns1 73658             | 1.552114521 | 1.86231E-05 | 1.50462401   | 2.42115E-05 |
| Unc45b 217012           | 1.551522209 | 0.110816912 | 1.295191071  | 0.207300744 |
| D3Ertd254e 241944       | 1.550321623 | 0.205456718 | -1.012658604 | 0.48573066  |
| Mitd1 69028             | 1.550054037 | 0.181041043 | 1.702241461  | 0.128772699 |
| Thbd 21824              | 1.549981151 | 0.15441603  | 1.179650758  | 0.32896355  |
| Trmt11 73681            | 1.549749327 | 0.158044517 | 2.30907801   | 0.040354098 |
| Pla2g7 27226            | 1.549663498 | 0.055437868 | 1.484157313  | 0.020365534 |
| Trem12 328833           | 1.54965616  | 0.202792098 | 1.309465955  | 0.298915572 |
| Dnaic1 68922            | 1.549216748 | 0.208533331 | 1.409166295  | 0.255948929 |
| Gfod1 328232            | 1.548744518 | 0.237273037 | 1.548744518  | 0.237273037 |
| Camk4 12326             | 1.548400408 | 0.238457863 | 1.897134943  | 0.18332558  |
| Pdk4 27273              | 1.548297846 | 0.082605725 | 1.597363838  | 0.045847794 |
| Cnnm1 83674             | 1.548130419 | 0.300774108 | 1.561221429  | 0.345871498 |
| Tmem200b 623230         | 1.547672227 | 0.159807021 | 1.31376077   | 0.214507599 |
| Fmo3 14262              | 1.546794514 | 0.042880032 | 1.963178797  | 0.001247135 |

|                     |             |             |              |             |
|---------------------|-------------|-------------|--------------|-------------|
| Mycl1 16918         | 1.544664124 | 0.063517674 | 1.739653145  | 0.042698852 |
| Dmrta2 242620       | 1.543991786 | 0.340461672 | 1            | #DIV/0!     |
| Mybpc2 233199       | 1.543991786 | 0.340461672 | 1            | #DIV/0!     |
| Ptpr1 19279         | 1.543991786 | 0.340461672 | 1            | #DIV/0!     |
| Tex12 66654         | 1.543991786 | 0.340461672 | 1            | #DIV/0!     |
| Lhfp14 269788       | 1.543991786 | 0.340461672 | 1            | #DIV/0!     |
| Crlf1 12931         | 1.543991786 | 0.340461672 | 1            | #DIV/0!     |
| Al429214 621080     | 1.543659029 | 0.274025351 | -1.545699182 | 0.181043012 |
| Myc 17869           | 1.543225787 | 0.101162912 | 1.089161531  | 0.354665473 |
| Loxl4 67573         | 1.542782138 | 0.146056754 | 1.127108982  | 0.33185127  |
| Lnx1 16924          | 1.540895169 | 0.280208374 | -1.187493756 | 0.402928474 |
| Col1a2 12843        | 1.540750877 | 0.015148384 | 1.852572646  | 0.000966699 |
| Wfdc2 67701         | 1.538068644 | 0.20152326  | -1.168801684 | 0.274855216 |
| Xrn1 24127          | 1.537985247 | 0.196644878 | -1.083893283 | 0.420822078 |
| Trim13 66597        | 1.537977707 | 0.183943505 | 1.299597075  | 0.283667164 |
| Figf 14205          | 1.537025115 | 0.231473699 | 2.088968806  | 0.109749661 |
| Styx 56291          | 1.536301193 | 0.219565828 | 2.801802244  | 0.050413261 |
| Fpgt 75540          | 1.536143441 | 0.218346592 | 2.598637941  | 0.067424281 |
| Hcst 23900          | 1.535983687 | 0.266660878 | 1.256853002  | 0.375302811 |
| Fmn2 54418          | 1.535813957 | 0.214574236 | 2.097063616  | 0.12559501  |
| 2210408121Rik 72371 | 1.535762912 | 0.271142875 | 3.152792568  | 0.097328085 |
| Pnrc1 108767        | 1.53510786  | 0.041387844 | 1.555842865  | 0.007378161 |
| Lrrn4cl 68852       | 1.534816085 | 0.206154791 | 1.534816085  | 0.206154791 |
| Ppid 67738          | 1.534522964 | 0.041166701 | 1.534522964  | 0.041166701 |
| Mmp11 17385         | 1.534353078 | 0.093865424 | 1.67257936   | 0.058867608 |
| Phf10 72057         | 1.533265584 | 0.019953762 | 1.72476554   | 0.007948434 |
| Mup20 381530        | 1.533140166 | 0.003629128 | 1.793632035  | 6.05279E-05 |
| Gm14403 433520      | 1.531839274 | 0.062308366 | 1.695764071  | 0.003324117 |
| Apex2 77622         | 1.53089955  | 0.025376986 | 1.734764466  | 0.010107784 |
| Gm14434 668039      | 1.530409833 | 0.292898403 | 3.711837887  | 0.101383067 |
| Rwdd2a 69519        | 1.529982304 | 0.320965612 | -1.76025563  | 0.245710688 |
| Chadl 214685        | 1.52959715  | 0.244522287 | 1.576626233  | 0.241936065 |
| Anxa13 69787        | 1.529512029 | 0.246558279 | 2.176557753  | 0.150790365 |
| Fytd1 69823         | 1.529481084 | 0.031438407 | 1.803747552  | 0.006922127 |
| Gm561 228715        | 1.529241847 | 0.042860945 | 1.368290734  | 0.086429621 |
| Hagl 68977          | 1.529007951 | 0.11325651  | 1.529007951  | 0.11325651  |
| Med31 67279         | 1.528499771 | 0.118717161 | 1.277679232  | 0.219991269 |
| Them4 75778         | 1.527974844 | 0.004694177 | 1.478063041  | 0.001694963 |
| Zfp366 238803       | 1.526082857 | 0.345733557 | 3.53972      | 0.173296754 |
| Agxt2l1 71760       | 1.525569137 | 0.0080857   | 1.389069131  | 0.008470735 |
| Blmh 104184         | 1.525383658 | 0.000624579 | 1.525383658  | 0.000624579 |
| Ptprm 19274         | 1.524458804 | 0.188661168 | 1.160908025  | 0.373083355 |
| Gm4013 100042757    | 1.524198416 | 0.090880098 | 1.44444941   | 0.094530773 |
| Cyp2c40 13099       | 1.524037714 | 5.89652E-05 | 1.514136635  | 7.71541E-06 |
| Phospho1 237928     | 1.523977009 | 0.028281498 | 1.523977009  | 0.028281498 |
| Gm5607 434280       | 1.523806667 | 0.344811039 | 1            | #DIV/0!     |
| Gpr143 18241        | 1.523806667 | 0.344811039 | 1            | #DIV/0!     |
| Eda2r 245527        | 1.523806667 | 0.344811039 | 1            | #DIV/0!     |
| Spata17 74717       | 1.523806667 | 0.344811039 | 1            | #DIV/0!     |
| Cyb5r2 320635       | 1.523806667 | 0.344811039 | 1            | #DIV/0!     |
| AU023871 106722     | 1.523806667 | 0.344811039 | 1            | #DIV/0!     |
| Il1rn 16181         | 1.523665053 | 0.031750869 | 1.347817839  | 0.056407876 |
| Hspa1l 15482        | 1.523593207 | 0.180133251 | 2.074413169  | 0.084458387 |



|                      |             |             |              |             |
|----------------------|-------------|-------------|--------------|-------------|
| Ccno 218630          | 1.523122753 | 0.177202593 | 1.815633751  | 0.068671382 |
| Rnf144a 108089       | 1.521787154 | 0.067416119 | 1.717408719  | 0.011454019 |
| Serpinh1 12406       | 1.521617511 | 0.012522605 | 1.371995266  | 0.014588717 |
| Lamtor3 56692        | 1.521566859 | 0.008030339 | 1.521566859  | 0.008030339 |
| Fbxo44 230903        | 1.520979276 | 0.063378479 | 1.565434627  | 0.037322805 |
| Clec4n 56620         | 1.520585967 | 0.251566621 | 1.341255403  | 0.276262558 |
| Leprotl1 68192       | 1.520308446 | 0.001878333 | 1.336276236  | 0.003597429 |
| Rab3b 69908          | 1.520171418 | 0.223219206 | 2.451183368  | 0.081306495 |
| Rasl2-9-ps 19428     | 1.519895066 | 0.208242547 | 1.056067682  | 0.451113008 |
| Slc43a2 215113       | 1.518996735 | 0.026644094 | 1.275738218  | 0.047380587 |
| Dnajc24 99349        | 1.518634373 | 0.143762708 | 1.85808255   | 0.084413074 |
| Abcb1b 18669         | 1.517868413 | 0.127813212 | 1.963768857  | 0.042895707 |
| Hist1h2ac 319164     | 1.517325281 | 0.294290837 | -1.327863533 | 0.3395387   |
| Cyp26b1 232174       | 1.517253848 | 0.175138758 | 1.311476574  | 0.266994516 |
| Egfl6 54156          | 1.517219203 | 0.298445829 | -1.134788439 | 0.440829738 |
| Otud1 71198          | 1.516809503 | 0.184149991 | 1.516809503  | 0.184149991 |
| Kctd5 69259          | 1.516270061 | 0.003559442 | 1.595094914  | 0.000489951 |
| Galntl2 78754        | 1.515658791 | 0.362921753 | -4.6202      | 0.07056113  |
| Loxl2 94352          | 1.515001621 | 0.11542724  | 1.659504888  | 0.053043363 |
| 6330503K22Rik 101565 | 1.514113161 | 0.246076273 | 4.287574707  | 0.004643506 |
| Pcdhb9 93880         | 1.513614992 | 0.347048781 | 1            | #DIV/0!     |
| Espnl 227357         | 1.513614992 | 0.347048781 | 1            | #DIV/0!     |
| Wnt6 22420           | 1.513614992 | 0.347048781 | 1            | #DIV/0!     |
| Cacna1h 58226        | 1.513614992 | 0.347048781 | 1            | #DIV/0!     |
| Cdkl3 213084         | 1.513614992 | 0.347048781 | 1            | #DIV/0!     |
| Muc2 17831           | 1.513614992 | 0.347048781 | 1            | #DIV/0!     |
| Foxred2 239554       | 1.513614992 | 0.347048781 | 1            | #DIV/0!     |
| Hmga2 15364          | 1.513614992 | 0.347048781 | 1            | #DIV/0!     |
| Arl4a 11861          | 1.512815055 | 0.018808521 | 1.435935565  | 0.016907704 |
| 4933433P14Rik 66787  | 1.510478533 | 0.056422827 | 1.201561744  | 0.186737957 |
| Elf4 56501           | 1.509758557 | 0.084037864 | 1.784058531  | 0.040996457 |
| Eef1e1 66143         | 1.509091414 | 0.049851427 | 1.902142762  | 0.00389414  |
| 4921531C22Rik 66730  | 1.508119084 | 0.143125479 | 1.508119084  | 0.143125479 |
| Tdp1 104884          | 1.506845115 | 0.191157632 | 1.062828363  | 0.4340114   |
| Basp1 70350          | 1.505555795 | 0.229516995 | 2.722960505  | 0.053310408 |
| Yod1 226418          | 1.505360233 | 0.079234556 | 1.677589338  | 0.029385856 |
| Ostc 66357           | 1.505213455 | 0.003698621 | 1.505213455  | 0.003698621 |
| Rps27a 78294         | 1.503780395 | 0.05899527  | 1.246739733  | 0.077578772 |
| Al506816 433855      | 1.503576894 | 0.018465531 | 1.228203987  | 0.01899898  |
| Mbnl3 171170         | 1.503284651 | 0.266908369 | -1.364833499 | 0.27514407  |
| Cth 107869           | 1.502899451 | 0.077606159 | 1.502899451  | 0.077606159 |
| Uap1l1 227620        | 1.501499268 | 0.118694157 | 1.231810917  | 0.093864715 |
| Rab12 68708          | 1.500779567 | 0.16057069  | 1.814235327  | 0.10326542  |
| Gnb4 14696           | 1.500275723 | 0.245041763 | 1.810320672  | 0.174098776 |
| Usp2 53376           | 1.500018051 | 0.114804354 | 1.500018051  | 0.114804354 |
| Cdca4 71963          | 1.499212742 | 0.079290751 | 1.388359563  | 0.13154936  |
| Id1 15901            | 1.49918516  | 0.221235865 | 1.098701917  | 0.364479087 |
| Utp23 78581          | 1.498266283 | 0.022851095 | 1.323865223  | 0.044744872 |
| Gpr153 100129        | 1.49812176  | 0.126542799 | 1.897636837  | 0.012509157 |
| Metrn1 210029        | 1.497167297 | 0.058621107 | 1.497167297  | 0.058621107 |
| Abcg3 27405          | 1.496594879 | 0.250812516 | 2.09719198   | 0.085248798 |
| Caskin1 268932       | 1.496485249 | 0.296372051 | 1.869568631  | 0.262507494 |
| Itga5 16402          | 1.496091338 | 0.000841445 | 1.444909909  | 9.08194E-05 |

|                     |             |             |              |             |
|---------------------|-------------|-------------|--------------|-------------|
| Cd86 12524          | 1.495086867 | 0.249474109 | 1.495086867  | 0.249474109 |
| Col4a1 12826        | 1.494456392 | 0.01019788  | 1.378848238  | 0.022095056 |
| Pam16 66449         | 1.494285688 | 0.090368043 | 1.723161268  | 0.015507514 |
| Pdpxp 57028         | 1.49369221  | 0.302924202 | -1.120799574 | 0.446529338 |
| Cxx1c 72865         | 1.493638138 | 0.240689816 | -1.048079823 | 0.460385891 |
| Syt9 60510          | 1.49363479  | 0.284847167 | 2.497345645  | 0.15023545  |
| Cntnap1 53321       | 1.49318664  | 0.218886533 | 1.075820605  | 0.440481019 |
| Rab34 19376         | 1.492712295 | 0.169996807 | 1.06103035   | 0.409963228 |
| Akr1b3 11677        | 1.49139661  | 0.032425612 | 1.702621254  | 0.011095391 |
| Slc25a33 70556      | 1.49068832  | 0.076461858 | 1.27179778   | 0.156051525 |
| Zfp109 56869        | 1.49057391  | 0.298051838 | 3.884819044  | 0.079108848 |
| Tmem189 407243      | 1.489694628 | 0.024470261 | 1.375578277  | 0.051076718 |
| Dcaf4 73828         | 1.488135949 | 0.116163928 | 1.263372542  | 0.231804503 |
| Gata5 14464         | 1.487381248 | 0.304720339 | -1.125555129 | 0.444583663 |
| Zfp688 69234        | 1.486767757 | 0.074543312 | 1.269328572  | 0.158402985 |
| Gm16515 24083       | 1.486691234 | 0.098782751 | 1.766817784  | 0.048429334 |
| Cyb561 13056        | 1.486682606 | 0.01289864  | 1.486682606  | 0.01289864  |
| Gm10052 654467      | 1.486498468 | 0.054425788 | 1.708514668  | 0.024044223 |
| Zyg11a 230590       | 1.485971928 | 0.334366802 | 3.53972      | 0.173296754 |
| Glp2r 93896         | 1.485802747 | 0.307469052 | -1.202217172 | 0.412618198 |
| Gm6225 633947       | 1.485365753 | 0.295536465 | 3.142379154  | 0.110829606 |
| Gal3st1 53897       | 1.485353516 | 0.181174725 | 1.935212217  | 0.03877158  |
| Dleu2 668253        | 1.483734761 | 0.085025644 | 1.274874458  | 0.174638979 |
| Dis3 72662          | 1.483440762 | 0.071698186 | 1.2935024    | 0.146717988 |
| Cd300lb 217304      | 1.483338548 | 0.250884917 | 1.397926113  | 0.268339602 |
| Asf1a 66403         | 1.483189256 | 0.178755872 | 1.304274245  | 0.20307533  |
| Fam189a2 381217     | 1.482617595 | 0.078993409 | 1.393575225  | 0.028167327 |
| Tigd2 68140         | 1.482576269 | 0.080882018 | 1.380783218  | 0.142321095 |
| Ccdc148 227933      | 1.482247167 | 0.169329044 | 1.193865056  | 0.329205452 |
| 1110020A21Rik 68531 | 1.48143262  | 0.220529882 | 2.067446514  | 0.111647371 |
| Tmem39a 67846       | 1.480191197 | 0.030323204 | 1.886250268  | 0.000644759 |
| 5430402O13Rik 73183 | 1.479301419 | 0.204870007 | 1.11607949   | 0.40463379  |
| 2610039C10Rik 66578 | 1.478748007 | 0.255313892 | 2.049454485  | 0.157687848 |
| Ctdspl2 329506      | 1.478354143 | 0.187782579 | 1.14140149   | 0.375388333 |
| Gpr157 269604       | 1.478028226 | 0.012069183 | 1.478028226  | 0.012069183 |
| Anxa1 16952         | 1.477864408 | 0.229834851 | 2.082032377  | 0.118941435 |
| Celf2 14007         | 1.477777878 | 0.123766061 | 1.402830161  | 0.140365493 |
| Bok 51800           | 1.477398605 | 0.00866254  | 1.361571201  | 0.018187599 |
| Galc 14420          | 1.476931759 | 0.021432313 | 1.634307207  | 0.0095011   |
| Rad51c 114714       | 1.476797103 | 0.180016042 | 1.917674808  | 0.018159798 |
| Cyp2c69 100043108   | 1.476643144 | 0.042819821 | 1.476643144  | 0.042819821 |
| Ppp1r14a 68458      | 1.476234581 | 0.202429315 | 1.476234581  | 0.202429315 |
| Snx24 69226         | 1.47569025  | 0.113471698 | 1.074861404  | 0.388119972 |
| Zfp651 270210       | 1.475125874 | 0.092836532 | 1.475125874  | 0.092836532 |
| Gtpbp2 56055        | 1.474356772 | 0.012217025 | 1.433855061  | 0.002944848 |
| Wdr47 99512         | 1.473239224 | 0.267382334 | 1.247693513  | 0.359706472 |
| Unc13b 22249        | 1.470855997 | 0.023081946 | 1.674915903  | 0.005375902 |
| Trim45 229644       | 1.470472773 | 0.197742655 | 1.470472773  | 0.197742655 |
| Tmtc1 387314        | 1.468820233 | 0.13853875  | 1.473527165  | 0.038804557 |
| Tomt 791260         | 1.468576966 | 0.225550785 | -1.178587428 | 0.333808582 |
| Gem 14579           | 1.468368912 | 0.228583045 | 1.672315717  | 0.160612305 |
| Cav1 12389          | 1.468218653 | 0.288998444 | -1.123819285 | 0.432906884 |
| Ctla2a 13024        | 1.467784128 | 0.13787279  | 2.203102937  | 0.00440941  |

|                      |             |             |              |             |
|----------------------|-------------|-------------|--------------|-------------|
| Prr15 78004          | 1.467486826 | 0.312698756 | -1.217222222 | 0.407029201 |
| Rnmt 67897           | 1.467441968 | 0.010653239 | 1.594639417  | 0.004902311 |
| Cep70 68121          | 1.467274298 | 0.303617064 | 1.741557483  | 0.264325109 |
| Plxna1 18844         | 1.465644466 | 0.064454262 | 1.15061706   | 0.236867964 |
| Lsm5 66373           | 1.465086614 | 0.276650904 | 1.817915524  | 0.21549686  |
| Mlf1 17349           | 1.464174545 | 0.330521691 | 5.0331       | 0.093589634 |
| A830080D01Rik 382252 | 1.464174545 | 0.330521691 | 5.0331       | 0.093589634 |
| Rassf10 78748        | 1.464174545 | 0.330521691 | 5.0331       | 0.093589634 |
| Kdm2b 30841          | 1.463624351 | 0.160700159 | 1.452099642  | 0.11742642  |
| Cbr3 109857          | 1.463490639 | 0.084966591 | 1.770455624  | 0.027365596 |
| Syt12 171180         | 1.462378844 | 0.220447848 | -1.142453521 | 0.367631576 |
| Gm9992 667055        | 1.462120402 | 0.252754229 | 1.009326982  | 0.493355312 |
| Slc26a11 268512      | 1.461948145 | 0.005808637 | 1.371075532  | 0.012994408 |
| Ahi1 52906           | 1.461445604 | 0.324601227 | 1.550039004  | 0.34809122  |
| Adnp2 240442         | 1.46139495  | 0.219793073 | 2.342400888  | 0.05690876  |
| Chrm1 12669          | 1.461294043 | 0.16165591  | 1.6257827    | 0.098804297 |
| Zmat1 215693         | 1.460974562 | 0.168629251 | -1.043883908 | 0.44080055  |
| Rbbp8 225182         | 1.460620565 | 0.145477328 | 1.479873563  | 0.050321416 |
| Eml6 237711          | 1.460606061 | 0.371637124 | 1            | #DIV/0!     |
| Atp11b 76295         | 1.459736247 | 0.064850385 | 1.661121937  | 0.013621546 |
| Tmem55b 219024       | 1.459719215 | 0.007043215 | 1.551012435  | 0.004807465 |
| Fam187b 76415        | 1.459251864 | 0.048677622 | 1.378918222  | 0.085859652 |
| Slc35e3 215436       | 1.458149029 | 0.092891839 | 1.614380504  | 0.009062465 |
| Tat 234724           | 1.458120092 | 0.07800485  | 1.710750107  | 0.031974476 |
| Nap1l1 53605         | 1.457400894 | 0.002920931 | 1.457400894  | 0.002920931 |
| Slco1a1 28248        | 1.457149104 | 0.041225585 | 1.626926634  | 0.020332895 |
| Eri1 67276           | 1.455321313 | 0.189934072 | 1.891633522  | 0.095431409 |
| Pgam5 72542          | 1.455195459 | 0.084607691 | 1.360478228  | 0.011097706 |
| Gm15772 100034726    | 1.45508339  | 0.397040671 | -159.72342   | 0.070951641 |
| Fam164c 72350        | 1.454635324 | 0.054712534 | 1.565094754  | 0.028377718 |
| Jph1 57339           | 1.454545455 | 0.372796286 | 1            | #DIV/0!     |
| 4930453N24Rik 67609  | 1.453967228 | 0.052609639 | 1.679115368  | 0.018253246 |
| Nlrp12 378425        | 1.453309796 | 0.03670937  | 1.304634286  | 0.070894495 |
| Gm10639 100042314    | 1.452857727 | 0.27526477  | 1.452857727  | 0.27526477  |
| Tfeb 21425           | 1.45278101  | 0.009083848 | 1.380682422  | 0.020407911 |
| Ccdc122 108811       | 1.45235913  | 0.201357566 | 1.126176735  | 0.391450626 |
| Cpeb3 208922         | 1.452306823 | 0.222505383 | 1.407813988  | 0.218020386 |
| 2810454H06Rik 72813  | 1.452171165 | 0.372720229 | -2.76078     | 0.173296754 |
| Nip7 66164           | 1.450196588 | 0.005789742 | 1.54401215   | 0.003464869 |
| Col4a3 12828         | 1.450055071 | 0.338996507 | 10.68586667  | 0.03955673  |
| Adra1a 11549         | 1.448068237 | 0.104114654 | 2.03128055   | 0.001335851 |
| D230037D09Rik 320351 | 1.447897694 | 0.088418718 | 1.930340432  | 0.004248331 |
| Ggt5 23887           | 1.447659507 | 0.025715275 | 1.315368297  | 0.047765982 |
| Tmem198 319998       | 1.447445361 | 0.343047623 | -1.924451597 | 0.222249861 |
| Samsn1 67742         | 1.447377722 | 0.300100475 | -1.186624586 | 0.403199787 |
| Hccs 15159           | 1.447235225 | 0.118265324 | 1.382152726  | 0.165346169 |
| A830082N09Rik 414093 | 1.446778134 | 0.335849673 | 5.0331       | 0.093589634 |
| Nek2 18005           | 1.445879939 | 0.272876361 | -1.131666396 | 0.407857015 |
| Scamp5 56807         | 1.445458226 | 0.015854416 | 1.549177813  | 0.010346847 |
| 4931440P22Rik 71004  | 1.443330144 | 0.258568166 | 1.443330144  | 0.258568166 |
| Mark1 226778         | 1.44319648  | 0.292197929 | 1.380313321  | 0.29986082  |
| Pigc 67292           | 1.44306489  | 0.037172174 | 1.44306489   | 0.037172174 |
| Tusc5 237858         | 1.44203427  | 0.161159893 | 1.189560462  | 0.313745804 |

|                      |             |             |              |             |
|----------------------|-------------|-------------|--------------|-------------|
| Rab6b 270192         | 1.441643016 | 0.144010578 | 1.197318563  | 0.288572468 |
| Sspn 16651           | 1.441451757 | 0.22189476  | 1.875628403  | 0.128510793 |
| Ift80 68259          | 1.441285413 | 0.304948702 | 1.441285413  | 0.304948702 |
| Dpy19l1 244745       | 1.441280805 | 0.012885667 | 1.331853063  | 0.022070456 |
| Enox2 209224         | 1.441050153 | 0.112757746 | 1.578445871  | 0.064241961 |
| Thsd7a 330267        | 1.440855769 | 0.277153022 | 1.440855769  | 0.277153022 |
| Tmem164 209497       | 1.439204059 | 0.104135116 | 1.720025429  | 0.04301679  |
| Cpxm1 56264          | 1.438958506 | 0.077866574 | 1.096291686  | 0.300850527 |
| Tmem50b 77975        | 1.437994786 | 0.133275232 | 1.437994786  | 0.133275232 |
| Gm4535 100043585     | 1.437978445 | 0.198843461 | 1.713296487  | 0.07598982  |
| Pargl 26430          | 1.437884884 | 0.007658356 | 1.437884884  | 0.007658356 |
| Aifm2 71361          | 1.437573464 | 5.00433E-05 | 1.437573464  | 5.00433E-05 |
| P2ry12 70839         | 1.43726345  | 0.376580875 | 1            | #DIV/0!     |
| Gm6377 622976        | 1.43726345  | 0.376580875 | 1            | #DIV/0!     |
| Fgfbp3 72514         | 1.436533446 | 0.237920079 | 2.159930886  | 0.091964252 |
| Mdga1 74762          | 1.43640584  | 0.333714983 | 1.255130842  | 0.411829119 |
| Pak6 214230          | 1.435511399 | 0.145314012 | 1.285884312  | 0.229163778 |
| Tollip 54473         | 1.435381699 | 0.000518031 | 1.451707806  | 7.60791E-05 |
| Tspyl2 52808         | 1.434994058 | 0.011105822 | 1.434994058  | 0.011105822 |
| Nfxl1 100978         | 1.434677285 | 0.151005267 | 1.67894942   | 0.041930173 |
| Ercc8 71991          | 1.434281115 | 0.182052227 | 1.200815148  | 0.306148939 |
| E130308A19Rik 230259 | 1.434125302 | 0.196182397 | 1.200686053  | 0.318876424 |
| Msh2 17685           | 1.433837131 | 0.03926054  | 1.403177762  | 0.00819562  |
| Cep57l1 103268       | 1.433801186 | 0.230330496 | 1.433801186  | 0.230330496 |
| Cyp4f18 72054        | 1.432388113 | 0.223314613 | -1.04543465  | 0.459223657 |
| 1700040L02Rik 73287  | 1.431859551 | 0.144352513 | 2.062429783  | 0.009656562 |
| Apbb1ip 54519        | 1.431638614 | 0.149190799 | 2.133336226  | 0.012898604 |
| Far1 67420           | 1.430582801 | 0.377132364 | -2.8         | 0.173296754 |
| Pros1 19128          | 1.429847337 | 0.067297671 | 1.429847337  | 0.067297671 |
| 4833442J19Rik 320204 | 1.429686467 | 0.054978668 | 1.284954306  | 0.063605765 |
| Ccl25 20300          | 1.428859426 | 0.204287231 | 1.428859426  | 0.204287231 |
| Dcun1d3 233805       | 1.428476905 | 0.007934991 | 1.428476905  | 0.007934991 |
| Trim72 434246        | 1.428291419 | 0.303595886 | 2.385256317  | 0.155903388 |
| Prps1l3 328099       | 1.427923604 | 0.077184489 | 1.575328796  | 0.052359391 |
| Tmem120b 330189      | 1.427468184 | 0.248842224 | -1.324980782 | 0.166775619 |
| Cpz 242939           | 1.426810116 | 0.281612218 | 1.426810116  | 0.281612218 |
| Morf4l1 21761        | 1.426642794 | 0.000803631 | 1.300191428  | 0.001265608 |
| Fbxo10 269529        | 1.426265734 | 0.179612997 | 1.101534391  | 0.384044447 |
| Cd3g 12502           | 1.426091385 | 0.185710805 | 1.701700637  | 0.056908728 |
| Cspg4 121021         | 1.42603798  | 0.270682115 | 1.42603798   | 0.270682115 |
| Tmem216 68642        | 1.425649041 | 0.129003991 | 1.425649041  | 0.129003991 |
| Olfr1033 258571      | 1.425324895 | 0.243160342 | -1.235682044 | 0.284787689 |
| Cdca5 67849          | 1.424979394 | 0.378608862 | 1            | #DIV/0!     |
| Manba 110173         | 1.424694653 | 0.105698136 | 1.286728984  | 0.181311222 |
| Cry1 12952           | 1.424548817 | 0.039626761 | 1.310347507  | 0.001941683 |
| Wdr92 103784         | 1.424266957 | 0.043448151 | 1.424266957  | 0.043448151 |
| Nat14 269854         | 1.424114757 | 0.151589424 | 1.650753753  | 0.099230678 |
| Pfn2 18645           | 1.424047249 | 0.1781429   | 1.699516571  | 0.048298843 |
| Npat 244879          | 1.42400877  | 0.081804854 | 1.900174054  | 0.002051717 |
| Glt28d2 320302       | 1.423893733 | 0.151376284 | 1.705952512  | 0.020989191 |
| Polr2h 245841        | 1.423216272 | 0.080014808 | 1.661197783  | 0.010589413 |
| Cln6 76524           | 1.422685465 | 0.147508512 | 1.137626726  | 0.121554816 |
| Mettl4 76781         | 1.422576061 | 0.277399557 | -1.092741834 | 0.436908946 |

|                      |             |             |              |             |
|----------------------|-------------|-------------|--------------|-------------|
| Whsc1 107823         | 1.422350706 | 0.076418429 | 1.589388028  | 0.045391128 |
| BC100451 58251       | 1.422228    | 0.35122214  | 3.53972      | 0.173296754 |
| Mtf2 17765           | 1.422147473 | 0.298482829 | -1.260274249 | 0.343823515 |
| Vav1 22324           | 1.421968815 | 0.147811996 | 1.421968815  | 0.147811996 |
| Fam35a 75698         | 1.421939759 | 0.01705109  | 1.54165182   | 0.008193389 |
| 4930579K19Rik 75881  | 1.421921731 | 0.307271044 | 2.901746366  | 0.107384197 |
| Plekhg1 213783       | 1.421166703 | 0.067528335 | 1.408662508  | 0.019979567 |
| Mfsd7c 217721        | 1.420652013 | 0.049519676 | 1.757833209  | 0.001699707 |
| Yrdc 230734          | 1.4206216   | 0.001218221 | 1.4206216    | 0.001218221 |
| Carns1 107239        | 1.420558972 | 0.232722014 | 1.032411096  | 0.471270506 |
| Polr2d 69241         | 1.420223621 | 0.036072785 | 1.331962237  | 0.020237041 |
| Ccl27b 100040048     | 1.420092323 | 0.321518831 | 8.404084902  | 0.000634102 |
| Tek 21687            | 1.419753073 | 0.151971233 | 1.365267355  | 0.166163244 |
| Siva1 30954          | 1.419503692 | 0.034726264 | 1.299475984  | 0.070500943 |
| H2-M3 14991          | 1.418900874 | 0.114061243 | 1.939007863  | 0.004869833 |
| Tmc7 209760          | 1.418188539 | 0.167304048 | 1.655232943  | 0.067647171 |
| Plk2 20620           | 1.418074066 | 0.038447271 | 1.302695499  | 0.078096678 |
| Ctsl 13039           | 1.417230989 | 0.024522743 | 1.548842919  | 0.011426539 |
| Rcn1 19672           | 1.416584869 | 0.025599819 | 1.169398589  | 0.076128199 |
| Lrat 79235           | 1.416518739 | 0.168374716 | 1.667761447  | 0.049128382 |
| 41162 103080         | 1.416464953 | 0.163193599 | 1.584200382  | 0.068347162 |
| Kdm6b 216850         | 1.416437965 | 0.029242679 | 1.266481161  | 0.042606312 |
| Itgb2 16414          | 1.416009848 | 0.113356762 | 1.201110115  | 0.234899837 |
| Col4a5 12830         | 1.415746909 | 0.260529353 | 1.415746909  | 0.260529353 |
| Klhl9 242521         | 1.415568679 | 0.031405274 | 1.595111493  | 0.00850716  |
| Cd83 12522           | 1.415454893 | 0.271041297 | 1.196041987  | 0.373753569 |
| Setdb2 239122        | 1.414400783 | 0.313738203 | -1.596986964 | 0.106972279 |
| C2cd4d 271944        | 1.413799646 | 0.209716476 | 1.735794837  | 0.023828646 |
| Pafah1b3 18476       | 1.413378372 | 0.216116258 | -1.032875478 | 0.453316681 |
| Phf13 230936         | 1.413210152 | 0.176110567 | 1.82096403   | 0.071668902 |
| Sp5 64406            | 1.413115412 | 0.276999541 | -1.452450598 | 0.137779374 |
| Mogat1 68393         | 1.413023282 | 0.299755667 | 1.413023282  | 0.299755667 |
| Smc5 226026          | 1.412423922 | 0.260619969 | -1.002172774 | 0.498351266 |
| Fancm 104806         | 1.411850242 | 0.281237636 | -1.003996774 | 0.497448057 |
| Ttc8 76260           | 1.411798147 | 0.261293896 | 2.004778333  | 0.135859139 |
| Lbr 98386            | 1.41162008  | 0.187632119 | 1.889024934  | 0.066820898 |
| 2610301B20Rik 67157  | 1.411037523 | 0.219253234 | 1.072975131  | 0.433157647 |
| Col5a2 12832         | 1.410495482 | 0.236545323 | 1.421702807  | 0.194334091 |
| Ins16 27356          | 1.410196042 | 0.324347148 | 1.09482839   | 0.450334516 |
| 2310008H04Rik 224008 | 1.409812937 | 0.243399914 | 2.442770362  | 0.038925762 |
| Grap 71520           | 1.409284483 | 0.0378249   | 1.141154007  | 0.115295609 |
| Mageh1 75625         | 1.409096735 | 0.207231055 | 1.552504139  | 0.180598188 |
| Tuft1 22156          | 1.409090056 | 0.177980305 | 1.589685246  | 0.098142136 |
| Nccrp1 233038        | 1.40824647  | 0.307271775 | 2.160783016  | 0.178229908 |
| Arc 11838            | 1.408048675 | 0.382468346 | 1            | #DIV/0!     |
| Rel 19696            | 1.408048675 | 0.382468346 | 1            | #DIV/0!     |
| 1110034G24Rik 73747  | 1.40788285  | 0.043273091 | 1.516755155  | 0.010380729 |
| Dctpp1 66422         | 1.407862899 | 0.055590452 | 1.379545932  | 0.014239642 |
| Zbtb16 235320        | 1.407385018 | 0.154961926 | 1.150203817  | 0.320095041 |
| Slc15a2 57738        | 1.407275347 | 0.197590539 | 1.407275347  | 0.197590539 |
| Ntpcr 66566          | 1.406961559 | 0.046263349 | 1.136851567  | 0.170467988 |
| Arl3 56350           | 1.406753351 | 0.042861338 | 1.334996708  | 0.030518999 |
| Inpp5d 16331         | 1.406502749 | 0.104577901 | 1.706698025  | 0.03065706  |

|                      |             |             |              |             |
|----------------------|-------------|-------------|--------------|-------------|
| Rltpr 234695         | 1.406228221 | 0.305356037 | 1.406228221  | 0.305356037 |
| Tlr13 279572         | 1.405995325 | 0.276471615 | 1.441053198  | 0.29170982  |
| Ncrna00085 75202     | 1.405526824 | 0.213261271 | 1.405526824  | 0.213261271 |
| Gtf2a2 235459        | 1.40535501  | 0.034237626 | 1.286955417  | 0.070836622 |
| Hist3h2a 319162      | 1.404600058 | 0.090026539 | 1.528523259  | 0.068273553 |
| Enho 69638           | 1.404264327 | 0.041237745 | 1.152162089  | 0.155358038 |
| Park2 50873          | 1.403712234 | 0.068235728 | 1.224194344  | 0.135634807 |
| LOC319574 319574     | 1.403651984 | 0.298859436 | 1.267785937  | 0.377660013 |
| Prkcq 18761          | 1.403377248 | 0.250440253 | 1.176928072  | 0.367056618 |
| Col6a5 665033        | 1.403376716 | 0.358032949 | 3.3          | 0.173296754 |
| Atp1b2 11932         | 1.401737131 | 0.168950262 | 1.738173047  | 0.059269753 |
| Pcdhgb4 93701        | 1.401654008 | 0.387686767 | 1            | #DIV/0!     |
| Tmem79 71913         | 1.400949732 | 0.198290108 | 1.357658581  | 0.184495712 |
| Cela2a 13706         | 1.400610955 | 0.285581    | -1.36168866  | 0.078568306 |
| Rbak 57782           | 1.400476448 | 0.225012303 | 1.734326902  | 0.123566277 |
| Ppp1r3c 53412        | 1.400350331 | 0.043449129 | 1.343486997  | 0.000111711 |
| Lrrc42 77809         | 1.400043293 | 0.014561619 | 1.498343912  | 0.008131867 |
| Wdr91 101240         | 1.399883378 | 0.018947685 | 1.655766915  | 0.000085238 |
| Psg23 56868          | 1.399745384 | 0.203319559 | 2.238544129  | 0.012421612 |
| C030048B08Rik 269623 | 1.399400124 | 0.15300152  | -1.04882757  | 0.385253224 |
| Sox9 20682           | 1.399244899 | 0.066058938 | 1.549182811  | 0.037780502 |
| Senp1 223870         | 1.398862163 | 0.171347591 | -1.022317423 | 0.468778024 |
| Jam2 67374           | 1.398526315 | 0.282053085 | -1.118818431 | 0.415602248 |
| Wdr89 72338          | 1.398046966 | 0.142280761 | 1.09887391   | 0.32063493  |
| Abhd13 68904         | 1.397813297 | 0.073306137 | 1.455740935  | 0.002756559 |
| Slamf7 75345         | 1.397339487 | 0.320838157 | -1.071785009 | 0.465764816 |
| Armcx2 67416         | 1.397323052 | 0.261380443 | 2.060191377  | 0.007945367 |
| Il18r1 16182         | 1.397200771 | 0.02669261  | 1.448055668  | 0.005802332 |
| Zdhhc1 70796         | 1.397033813 | 0.08969211  | 1.070907198  | 0.342167162 |
| Wdsub1 72137         | 1.396732471 | 0.049148588 | 1.707646131  | 0.003496516 |
| BC002230 217827      | 1.396486181 | 0.00795864  | 1.286019507  | 0.013531857 |
| Cox7a1 12865         | 1.396447222 | 0.286365303 | 1.232044444  | 0.361067665 |
| Stam2 56324          | 1.396372793 | 0.060984059 | 1.396372793  | 0.060984059 |
| Csnk1g3 70425        | 1.396179709 | 0.061370183 | 1.503879065  | 0.028496796 |
| Rpa3 68240           | 1.395835851 | 0.203729515 | 2.153265814  | 0.018641756 |
| Impdh1 23917         | 1.395309044 | 0.111442794 | 1.24223798   | 0.21303372  |
| Cdh3 12560           | 1.394942433 | 0.297823171 | -1.090252881 | 0.446329168 |
| Apoa1 11806          | 1.394648937 | 0.037961239 | 1.225104043  | 0.052879531 |
| B9d2 232987          | 1.394146868 | 0.094119076 | 1.558774841  | 0.025809428 |
| Cdkn2d 12581         | 1.394088241 | 0.230342023 | 2.03521418   | 0.07417965  |
| Cdk2 12566           | 1.39382183  | 0.077326498 | 1.25865515   | 0.154654788 |
| Nupr1 56312          | 1.393189784 | 0.161323783 | 1.393189784  | 0.161323783 |
| Fam58b 69109         | 1.392999326 | 0.091927457 | 1.530547141  | 0.037502711 |
| Nol8 70930           | 1.392850817 | 0.150070229 | 1.392850817  | 0.150070229 |
| Rnf138 56515         | 1.392824627 | 0.093352185 | 1.629300964  | 0.034660211 |
| Capn12 60594         | 1.392682411 | 0.205687103 | 1.622825377  | 0.064377159 |
| Chchd2 14004         | 1.39256154  | 0.025297188 | 1.677036142  | 0.000484158 |
| Rcc1 100088          | 1.392304812 | 0.047292497 | 1.262994302  | 0.096261802 |
| Nupl1 71844          | 1.391259921 | 0.2569377   | -1.006771463 | 0.494369797 |
| Cln8 26889           | 1.391179193 | 0.020667258 | 1.596892232  | 0.000653363 |
| Bak1 12018           | 1.390933519 | 0.015999639 | 1.613392352  | 5.77095E-05 |
| Wbscr25 71304        | 1.390836727 | 0.302276732 | -1.099650326 | 0.442407865 |
| Lsm1 67207           | 1.390692335 | 0.110075999 | 1.368596306  | 0.092681323 |

|                         |             |             |              |             |
|-------------------------|-------------|-------------|--------------|-------------|
| Slc38a9 268706          | 1.38997561  | 0.109474772 | 1.38997561   | 0.109474772 |
| Rab39 270160            | 1.389457302 | 0.347964429 | 1.195314368  | 0.428478238 |
| C8b 110382              | 1.389212747 | 0.010236132 | 1.475877407  | 0.000912007 |
| Ypel2 77864             | 1.388365271 | 0.003676366 | 1.390637432  | 0.000841385 |
| Adat2 66757             | 1.388238576 | 0.181345074 | 1.38984008   | 0.068969996 |
| Lor 16939               | 1.387953754 | 0.283363163 | -1.301284902 | 0.17489906  |
| 1700048O20Rik 69430     | 1.387820893 | 0.27741802  | 1.291520216  | 0.23909431  |
| Fam118b 109229          | 1.387655785 | 0.174046963 | 1.103801761  | 0.369355192 |
| Snrpf 69878             | 1.38765416  | 0.07917831  | 1.561901914  | 0.011338939 |
| Zfp870 240066           | 1.38759085  | 0.14107951  | 1.586080276  | 0.044078895 |
| Pdgc 54635              | 1.387509488 | 0.253488483 | 1.846260801  | 0.142154439 |
| Cyp39a1 56050           | 1.387463386 | 0.071748376 | 1.581985742  | 0.003009222 |
| Slc7a5 20539            | 1.38745561  | 0.144422018 | 1.586985531  | 0.046471325 |
| Nxn 18230               | 1.387373962 | 0.152935837 | 1.21367985   | 0.114308126 |
| Hes1 15205              | 1.386884442 | 0.157067296 | 1.39969936   | 0.132215489 |
| Nrm 106582              | 1.386773538 | 0.225385307 | 1.843380978  | 0.105461215 |
| Mcts1 68995             | 1.386593619 | 0.033463805 | 1.487106863  | 0.022000739 |
| Trmt61b 68789           | 1.386447987 | 0.19095783  | 1.58547861   | 0.094374134 |
| Cntf 12803              | 1.386338358 | 0.352653129 | -1.660939759 | 0.284397279 |
| Zfp51 22709             | 1.385267798 | 0.313249393 | 1.26304666   | 0.371654839 |
| Dll4 54485              | 1.384873276 | 0.225223922 | 1.070811292  | 0.430119125 |
| Gna15 14676             | 1.384514192 | 0.334955267 | 1.641393273  | 0.301430455 |
| Snapc1 75627            | 1.384440112 | 0.042704895 | 1.511700334  | 0.007923519 |
| Gm15421 100042049       | 1.38407586  | 0.032547422 | 1.572779774  | 0.005193794 |
| Ppp6c 67857             | 1.383094267 | 0.080272598 | 1.383094267  | 0.080272598 |
| Zfp760 240034           | 1.382785229 | 0.299954047 | 4.115709757  | 0.002664025 |
| Gm11437 628813          | 1.382645201 | 0.22068191  | 2.235204596  | 0.018149289 |
| Tax1bp3 76281           | 1.382167234 | 0.027392619 | 1.265864139  | 0.056824502 |
| Cbl 12402               | 1.38201033  | 0.317611868 | -1.173406417 | 0.410469846 |
| Agps 228061             | 1.381888331 | 0.133080263 | 1.719949628  | 0.036532663 |
| 2210020M01Rik 66528     | 1.381734986 | 0.349738086 | 1.633421429  | 0.334663434 |
| C1qtnf5 235312          | 1.381590675 | 0.185860896 | 1.261694588  | 0.131634801 |
| Tead1 21676             | 1.381298575 | 0.057169881 | 1.74054975   | 0.000290679 |
| 2700081O15Rik 108899    | 1.381222255 | 0.13626359  | 1.652318357  | 0.058424842 |
| Rras2 66922             | 1.381136188 | 0.114030988 | 1.192572255  | 0.233371982 |
| Lins 72635              | 1.380992818 | 0.030886011 | 1.302096666  | 0.064079561 |
| Gm10345 100041269       | 1.380414419 | 0.144303921 | 1.115748346  | 0.317043865 |
| Stmn1 16765             | 1.38039923  | 0.108781721 | 1.180896052  | 0.227095328 |
| BC022687 217887         | 1.380106635 | 0.246798527 | 1.163916234  | 0.367030839 |
| Ppp1r32 67752           | 1.379892085 | 0.321041159 | 2.780872515  | 0.111971221 |
| Kdm5b 75605             | 1.378887892 | 0.05133566  | 1.378887892  | 0.05133566  |
| 1110002L01Rik 100043040 | 1.378760724 | 0.182458454 | 1.371440301  | 0.075250003 |
| Strn3 94186             | 1.378259969 | 0.141972046 | 1.445370985  | 0.073289199 |
| Rpl22l1 68028           | 1.377927016 | 0.140130954 | 1.104216321  | 0.312483984 |
| Bub1b 12236             | 1.377619555 | 0.34084237  | 2.365584001  | 0.182575382 |
| Dtx3 80904              | 1.377163739 | 0.053001586 | 1.490307489  | 0.034335657 |
| Frat1 14296             | 1.376902785 | 0.043677314 | 1.376902785  | 0.043677314 |
| Lpin2 64898             | 1.376372632 | 0.042781561 | 1.376372632  | 0.042781561 |
| Rce1 19671              | 1.375437773 | 0.050157057 | 1.226954506  | 0.094901196 |
| Ces1a 244595            | 1.375387163 | 0.339208367 | -1.465641937 | 0.303997643 |
| Oip5 70645              | 1.374683544 | 0.34444809  | 2.424107143  | 0.19229339  |
| Fastkd2 75619           | 1.374478055 | 0.113839805 | 1.548876571  | 0.031160822 |
| Fam195b 192173          | 1.373792622 | 0.061269609 | 1.221511895  | 0.122357919 |

|                     |             |             |              |             |
|---------------------|-------------|-------------|--------------|-------------|
| Mug2 17837          | 1.373675111 | 0.062349509 | 1.473536144  | 0.046423225 |
| Bola2 66162         | 1.373632874 | 0.128365393 | 1.171196441  | 0.263718737 |
| Rpp38 227522        | 1.373495246 | 0.296209009 | 1.970377453  | 0.137455265 |
| Sirt1 93759         | 1.37304183  | 0.208868785 | 2.181260198  | 0.010270298 |
| Gm6194 620966       | 1.372782482 | 0.212912525 | 1.045797334  | 0.44794724  |
| 1110006O24Rik 66123 | 1.372646503 | 0.169786739 | 1.706462061  | 0.069085724 |
| Cep72 74470         | 1.37227945  | 0.345541793 | 2.458544324  | 0.189381453 |
| Amica1 270152       | 1.372261549 | 0.260361294 | 2.242442651  | 0.060952075 |
| Arhgef4 226970      | 1.3719189   | 0.388976427 | -2.76078     | 0.173296754 |
| Gm11968 100042173   | 1.37055569  | 0.089817377 | 1.047981285  | 0.348758311 |
| Ppif 105675         | 1.370498904 | 0.001087256 | 1.296603083  | 0.001487398 |
| 2610002J02Rik 67513 | 1.370081687 | 0.003162522 | 1.50955002   | 0.000148601 |
| Setd7 73251         | 1.369667668 | 0.103516386 | 1.78930741   | 0.005806303 |
| Hspg2 15530         | 1.369091069 | 0.115236576 | 1.237320369  | 0.106688412 |
| Sgk1 20393          | 1.368740089 | 0.116506252 | 1.198916739  | 0.232339128 |
| Pigp 56176          | 1.36856045  | 0.047074824 | 1.211036601  | 0.076176391 |
| Prkg1 19091         | 1.367654286 | 0.375827874 | 4.57358      | 0.173296754 |
| Zfp655 72611        | 1.366713295 | 0.108992665 | 1.552703244  | 0.019793067 |
| Rabggtb 19352       | 1.36551309  | 0.006003011 | 1.36551309   | 0.006003011 |
| Gar1 68147          | 1.364703102 | 0.088266085 | 1.214645462  | 0.179582409 |
| Brd9 105246         | 1.363442044 | 0.138481541 | 1.173116554  | 0.275151951 |
| Lsm3 67678          | 1.363085051 | 0.187959287 | 2.194928092  | 0.003381248 |
| Spon1 233744        | 1.362859078 | 0.303925207 | 1.861784853  | 0.19447366  |
| 3110009E18Rik 73103 | 1.362236821 | 0.315219873 | -1.114180589 | 0.43641851  |
| Wscd1 216881        | 1.36208651  | 0.204346412 | -1.113823797 | 0.340409323 |
| Cds1 74596          | 1.361541512 | 0.362279629 | 8.011083333  | 0.041592481 |
| Haus2 66296         | 1.361361311 | 0.1729494   | 2.045272545  | 0.003789986 |
| Slc4a1 20533        | 1.361316811 | 0.339122912 | 1.263632904  | 0.384713168 |
| Ssh3 245857         | 1.361238838 | 0.016160074 | 1.1672619    | 0.018511932 |
| Gm13306 100039863   | 1.360369942 | 0.334686754 | 6.352862915  | 0.000716936 |
| Twist1 22160        | 1.36026632  | 0.278835097 | 2.098213132  | 0.105693718 |
| Ppp3cc 19057        | 1.359744087 | 0.194921436 | 1.7782093    | 0.065357324 |
| Acer3 66190         | 1.35938856  | 0.118933104 | 1.536204102  | 0.02980746  |
| Arl5c 217151        | 1.359254928 | 0.293639921 | 2.046415927  | 0.139427098 |
| Nup133 234865       | 1.358906392 | 0.082597932 | 1.744125147  | 0.002709953 |
| Med21 108098        | 1.358438724 | 0.127486467 | 1.358438724  | 0.127486467 |
| Cyp4a14 13119       | 1.358373333 | 0.124091569 | 1.358373333  | 0.124091569 |
| Slmo2 66390         | 1.357959876 | 0.064869786 | 1.361990676  | 0.012190592 |
| Ccnj 240665         | 1.357841631 | 0.200888629 | 1.042322362  | 0.443035771 |
| Rasgrp4 233046      | 1.357802696 | 0.274515725 | 1.208097625  | 0.315824161 |
| Slc17a1 20504       | 1.357398964 | 0.035868766 | 1.257061371  | 0.073352575 |
| Mex3d 237400        | 1.357115058 | 0.16746054  | 1.626939405  | 0.081329265 |
| Wdr35 74682         | 1.356671943 | 0.143662469 | 1.159173624  | 0.288210463 |
| Ppp1r8 100336       | 1.356576985 | 0.051705162 | 1.356576985  | 0.051705162 |
| Ube2a 22209         | 1.355976249 | 0.057032568 | 1.355976249  | 0.057032568 |
| Zmynd19 67187       | 1.355929409 | 0.178663829 | 1.607443583  | 0.099332768 |
| Mmp17 23948         | 1.355878163 | 0.230302419 | 1.355878163  | 0.230302419 |
| Plcb2 18796         | 1.355235885 | 0.246094923 | 1.355235885  | 0.246094923 |
| Haus5 71909         | 1.354945519 | 0.284068213 | 1.470776545  | 0.201520183 |
| Ap4b1 67489         | 1.353971813 | 0.09236122  | 1.342937918  | 0.04318066  |
| Nsd1 18193          | 1.353744226 | 0.002038404 | 1.498701285  | 1.80703E-05 |
| Atp6ap2 70495       | 1.353452434 | 0.090501124 | 1.312645316  | 0.055555904 |
| Clasp2 76499        | 1.353302104 | 0.018118375 | 1.353302104  | 0.018118375 |



|                     |             |             |              |             |
|---------------------|-------------|-------------|--------------|-------------|
| Rps8 20116          | 1.352460032 | 0.062510097 | 1.192936907  | 0.117890047 |
| Lsm10 116748        | 1.352383842 | 0.158727739 | 1.109804991  | 0.338591136 |
| Ccl24 56221         | 1.35237494  | 0.099669424 | 1.740396588  | 0.008892536 |
| Epm2a 13853         | 1.352001307 | 0.353769561 | -1.653158046 | 0.25567537  |
| Rrm2 20135          | 1.351958619 | 0.126271718 | 1.579091685  | 0.054205982 |
| Cmtm4 97487         | 1.351697007 | 0.08964865  | 1.150543132  | 0.173589202 |
| Arfip1 99889        | 1.351467142 | 0.051793937 | 1.295390943  | 0.026251792 |
| Rpl35a 57808        | 1.350614716 | 0.106042108 | 1.142648344  | 0.221787363 |
| Tmem2 83921         | 1.350035066 | 0.079452328 | 1.47433744   | 0.007579514 |
| Cryl1 68631         | 1.34970719  | 0.121235003 | 1.223046899  | 0.208527504 |
| Cyp4a10 13117       | 1.349671228 | 0.150322252 | 1.202338051  | 0.232975001 |
| Zxdb 668166         | 1.349602436 | 0.259379272 | -1.230810399 | 0.281407107 |
| Taf1b 21340         | 1.349564812 | 0.226767642 | -1.113027338 | 0.363607062 |
| Nup37 69736         | 1.349388556 | 0.268683165 | 1.918049114  | 0.117829423 |
| Ctla2b 13025        | 1.349297006 | 0.250863234 | 1.343300747  | 0.287173677 |
| Igf1 16000          | 1.34837827  | 0.011158889 | 1.256447305  | 0.015297132 |
| Ablim3 319713       | 1.348361356 | 0.04200757  | 1.435966228  | 0.029287904 |
| Ier5 15939          | 1.348054487 | 0.181787059 | 1.078706257  | 0.389961804 |
| Klhl6 239743        | 1.347885869 | 0.226454843 | 1.610533264  | 0.079583931 |
| DOH4S114 27528      | 1.34755902  | 0.113501965 | 1.697005168  | 0.009287699 |
| Sike1 66641         | 1.347100087 | 0.067181105 | 1.184095221  | 0.127903943 |
| Snrpg 68011         | 1.346234924 | 0.110903104 | 1.346234924  | 0.110903104 |
| Fmr1nb 207854       | 1.346211852 | 0.404078801 | 3.53972      | 0.173296754 |
| 5830415F09Rik 74753 | 1.346102186 | 0.20350651  | -1.01949463  | 0.475762024 |
| Map1lc3a 66734      | 1.345464526 | 0.03361466  | 1.230986165  | 0.062323825 |
| Dgkd 227333         | 1.345287995 | 0.027830615 | 1.345287995  | 0.027830615 |
| Acot1 26897         | 1.345216581 | 0.050063144 | 1.451758519  | 0.029862112 |
| Lamc1 226519        | 1.343987228 | 0.043203993 | 1.343987228  | 0.043203993 |
| Sema7a 20361        | 1.342639675 | 0.362599296 | 1.282144901  | 0.403677687 |
| Msl3l2 73390        | 1.34257337  | 0.272332789 | 1.597511955  | 0.146144483 |
| Serpine2 20720      | 1.34206431  | 0.147519292 | 1.671389326  | 0.035744342 |
| Gpc1 14733          | 1.341878663 | 0.196080381 | 1.785269264  | 0.049676939 |
| Il17rb 50905        | 1.341766899 | 0.076140971 | 1.240977736  | 0.140021744 |
| Armc2 213402        | 1.341387134 | 0.286454329 | 1.341387134  | 0.286454329 |
| E130112N10Rik 78668 | 1.341040048 | 0.321737386 | 1.341040048  | 0.321737386 |
| Klhdcc2 69554       | 1.340956481 | 0.104326306 | 1.340956481  | 0.104326306 |
| Gm826 329554        | 1.340547393 | 0.239556218 | 1.61395093   | 0.156256445 |
| 1810063B07Rik 67509 | 1.34001544  | 0.069206153 | 1.168478163  | 0.123569811 |
| Tcea1 21399         | 1.339968571 | 0.040213209 | 1.188625758  | 0.041440837 |
| H2afx 15270         | 1.339826968 | 0.114004269 | 1.339826968  | 0.114004269 |
| B9d1 27078          | 1.339802596 | 0.306365222 | 2.156277011  | 0.125131424 |
| Zswim1 71971        | 1.339625858 | 0.147814668 | 1.808545507  | 0.003710229 |
| Arhgap5 11855       | 1.339556029 | 0.31732865  | 2.936487147  | 0.047820025 |
| BC067068 216292     | 1.33940019  | 0.27372647  | 1.870879121  | 0.128139235 |
| 1700086O06Rik 73516 | 1.339247466 | 0.18679342  | 1.72502717   | 0.055167574 |
| Kdelc1 72050        | 1.338917752 | 0.093180005 | 1.068052166  | 0.343075477 |
| Ap4s1 11782         | 1.338642836 | 0.09243582  | 1.2679656    | 0.043226124 |
| 4930506M07Rik 71653 | 1.338635436 | 0.012281539 | 1.240710275  | 0.022410113 |
| Trim47 217333       | 1.338250726 | 0.1815359   | -1.068079385 | 0.337023301 |
| Helb 117599         | 1.338030552 | 0.131218934 | 1.338030552  | 0.131218934 |
| Cdc37l1 67072       | 1.337972465 | 0.056676698 | 1.693733558  | 8.33092E-05 |
| 0610009B22Rik 66050 | 1.337883213 | 0.063180472 | 1.523116098  | 0.015226865 |
| Rps9 76846          | 1.337873195 | 0.12253146  | 1.113944867  | 0.26419511  |

|                     |             |             |              |             |
|---------------------|-------------|-------------|--------------|-------------|
| Hspbp1 66667        | 1.337854815 | 0.144333551 | 1.025787862  | 0.451695278 |
| Cyp2c68 433247      | 1.33751581  | 0.008408766 | 1.383368421  | 0.001548213 |
| Fmo4 226564         | 1.33717119  | 0.165993534 | 1.600935374  | 0.011715063 |
| Zbtb6 241322        | 1.336857469 | 0.138675646 | 1.336857469  | 0.138675646 |
| Zw10 26951          | 1.336116258 | 0.121783719 | 1.116771799  | 0.262279617 |
| Arf2 11841          | 1.336086201 | 0.078185902 | 1.195474776  | 0.044513196 |
| Procr 19124         | 1.335826314 | 0.20166961  | 1.335826314  | 0.20166961  |
| Zfp738 408068       | 1.3354431   | 0.223458335 | 1.548137552  | 0.091222488 |
| Exosc8 69639        | 1.334946265 | 0.105226714 | 1.216425959  | 0.187864301 |
| Accs 329470         | 1.334775682 | 0.197431426 | 1.531053017  | 0.084592589 |
| Aimp1 13722         | 1.334624786 | 0.036461564 | 1.334624786  | 0.036461564 |
| Gabarapl2 93739     | 1.334236654 | 7.15116E-05 | 1.350810571  | 0.000023648 |
| 1500011B03Rik 66236 | 1.334172098 | 0.167320985 | 1.348772634  | 0.124779713 |
| Fkbp10 14230        | 1.334016502 | 0.212519748 | 1.334016502  | 0.212519748 |
| Sox7 20680          | 1.333997301 | 0.08599546  | 1.452565238  | 0.031803714 |
| Eps15 13858         | 1.333908471 | 0.055124034 | 1.420383388  | 0.03966891  |
| H2-Ab1 14961        | 1.333889699 | 0.172403395 | 1.022444016  | 0.438759934 |
| Pank2 74450         | 1.333738129 | 0.058511229 | 1.647611219  | 0.000241989 |
| Prkch 18755         | 1.333354483 | 0.221979179 | 1.033479292  | 0.459778453 |
| Glrx5 73046         | 1.333243688 | 0.01763666  | 1.42610756   | 0.00012261  |
| Ccdc162 75973       | 1.333097717 | 0.136939679 | 1.34094776   | 0.17750103  |
| Ints8 72656         | 1.332954834 | 0.263341591 | 1.009863622  | 0.49115838  |
| Rab12 19328         | 1.332450609 | 0.071585078 | 1.395094898  | 0.022748765 |
| Snx10 71982         | 1.332419741 | 0.116271159 | 1.518214503  | 0.015702194 |
| Mrpl23 19935        | 1.332336435 | 0.163798245 | 1.242137076  | 0.100200188 |
| Cabyr 71132         | 1.33208454  | 0.187142612 | 1.33208454   | 0.187142612 |
| Tmem48 72787        | 1.331939504 | 0.302373151 | 1.331939504  | 0.302373151 |
| Fam18a 383103       | 1.331768658 | 0.289287336 | 2.400344436  | 0.044420576 |
| Loh12cr1 67774      | 1.331323908 | 0.096227085 | 1.561815385  | 0.022192538 |
| Tmem41a 66664       | 1.331304236 | 0.064076371 | 1.331304236  | 0.064076371 |
| Peg10 170676        | 1.330249549 | 0.234777422 | 1.116683499  | 0.378914291 |
| Tmem87b 72477       | 1.330228958 | 0.084285913 | 1.724318323  | 0.000254854 |
| Cdc73 214498        | 1.329716659 | 0.115059444 | 1.551359636  | 0.038907117 |
| Rrs1 59014          | 1.329664745 | 0.04256029  | 1.199986926  | 0.073230531 |
| Ubn1 170644         | 1.329561277 | 0.009707352 | 1.245522671  | 0.013061471 |
| Patz1 56218         | 1.329225233 | 0.155972096 | 1.528816781  | 0.085972628 |
| Urb1 207932         | 1.328915205 | 0.272972101 | -1.167589566 | 0.294506566 |
| Sdad1 231452        | 1.32887523  | 0.100736997 | 1.32887523   | 0.100736997 |
| Pkdcc 106522        | 1.328624036 | 0.013066653 | 1.5073956    | 0.000530167 |
| Tsga10 211484       | 1.328364436 | 0.379094624 | 1.621721864  | 0.33676256  |
| lsyna1 71780        | 1.328276577 | 0.091439756 | 1.721312433  | 0.001368978 |
| Pdss1 56075         | 1.328049201 | 0.307259316 | -1.412454118 | 0.223939638 |
| Lass6 241447        | 1.328024932 | 0.263080526 | 1.059609134  | 0.450477882 |
| Ptgrfr 19220        | 1.327846269 | 0.36327268  | 1.016451995  | 0.491391961 |
| Susd2 71733         | 1.327810305 | 0.225188551 | 1.987120046  | 0.017774769 |
| Slc30a4 22785       | 1.327628073 | 0.243004911 | 1.327628073  | 0.243004911 |
| Clpx 270166         | 1.327513056 | 0.076178613 | 1.236125909  | 0.138300966 |
| Rnf215 71673        | 1.327127914 | 0.022161217 | 1.482897728  | 0.001393208 |
| Ubac1 98766         | 1.326069157 | 0.043848475 | 1.207077288  | 0.083514526 |
| Bcl10 12042         | 1.32598021  | 0.047204038 | 1.226498156  | 0.096638185 |
| Ube2u 381534        | 1.325855274 | 0.212593412 | 1.474594225  | 0.096296417 |
| Mipol1 73490        | 1.325633367 | 0.349009283 | -1.605913973 | 0.215079121 |
| Nsl1 381318         | 1.325600743 | 0.300561326 | 2.030178782  | 0.124330777 |

|                    |             |             |              |             |
|--------------------|-------------|-------------|--------------|-------------|
| Kdm1a 99982        | 1.325298047 | 0.029425946 | 1.340322029  | 0.007981237 |
| Slc2a6 227659      | 1.325273224 | 0.326824593 | 1.325273224  | 0.326824593 |
| Esrp1 207920       | 1.325150865 | 0.366877839 | -1.417117702 | 0.354892428 |
| 201011101Rik 72061 | 1.324763504 | 0.092464269 | 1.138181617  | 0.182795256 |
| Fert2 14158        | 1.324474003 | 0.266031123 | 2.092427303  | 0.050130648 |
| Phf5a 68479        | 1.324278003 | 0.03819952  | 1.114579811  | 0.118531704 |
| Nnmt 18113         | 1.324146344 | 0.101303156 | 1.047024691  | 0.381540861 |
| Lsm14a 67070       | 1.323658714 | 0.105727747 | 1.519166059  | 0.038802023 |
| Rpl9 20005         | 1.323515939 | 0.10576529  | 1.147859693  | 0.221911867 |
| Tinagl1 94242      | 1.3234238   | 0.020527821 | 1.373069792  | 0.013876022 |
| Pigw 70325         | 1.323230314 | 0.172085626 | 1.323230314  | 0.172085626 |
| Nova2 384569       | 1.322981809 | 0.246825965 | 1.199536828  | 0.164929423 |
| Cdyl 12593         | 1.321977596 | 0.308733017 | 1.654810424  | 0.176968877 |
| Gm6222 621381      | 1.321725939 | 0.088922914 | 1.352105305  | 0.021117256 |
| Rbm45 241490       | 1.321582888 | 0.15563099  | 1.142853546  | 0.201810487 |
| Med7 66213         | 1.32150484  | 0.11282826  | 1.716838796  | 0.004487871 |
| Gtpbp10 207704     | 1.32145793  | 0.141956782 | 1.32145793   | 0.141956782 |
| Serpina3k 20714    | 1.32125328  | 0.155726265 | 1.805170594  | 0.005075358 |
| Birc5 11799        | 1.321204839 | 0.199866337 | -1.054521738 | 0.421071723 |
| Rasa4 54153        | 1.320993595 | 0.262140185 | -1.001173652 | 0.49887128  |
| Nudcd1 67429       | 1.320643163 | 0.24029007  | 1.320643163  | 0.24029007  |
| Arl2bp 107566      | 1.319983224 | 0.086201963 | 1.077139749  | 0.31529962  |
| AI597468 103266    | 1.319876118 | 0.262515653 | 1.193406236  | 0.338996245 |
| Sdr9c7 70061       | 1.319534038 | 0.027517549 | 1.243826162  | 0.057345173 |
| Nfil3 18030        | 1.319513436 | 0.056461348 | 1.22276576   | 0.111325988 |
| Bnip3 12176        | 1.319475579 | 0.017156073 | 1.417204844  | 0.000901685 |
| Mat1a 11720        | 1.319336024 | 0.091816062 | 1.410549083  | 0.069501786 |
| Nt5dc2 70021       | 1.318831704 | 0.167091749 | 1.230282473  | 0.14303055  |
| Cd2 12481          | 1.318559409 | 0.280251274 | 1.286487709  | 0.303166733 |
| Fam76b 72826       | 1.318395245 | 0.239972111 | 1.153688785  | 0.368542004 |
| Snrnp48 67797      | 1.318238672 | 0.079464728 | 1.447831937  | 0.017808006 |
| Plscr1 22038       | 1.317953812 | 0.158691399 | 1.165868882  | 0.274566156 |
| Rasl10b 276952     | 1.317796154 | 0.22594826  | 2.007147433  | 0.011562315 |
| Lmbrd2 320506      | 1.317025714 | 0.413546139 | 1            | #DIV/0!     |
| Dusp1 19252        | 1.316840875 | 0.116430618 | 1.759838203  | 0.000892811 |
| Orc2 18393         | 1.316289001 | 0.137734192 | 1.316289001  | 0.137734192 |
| Mical3 194401      | 1.315952104 | 0.121809512 | 1.315952104  | 0.121809512 |
| Snrpe 20643        | 1.315892847 | 0.096202725 | 1.180664841  | 0.1871235   |
| Surf6 20935        | 1.315817875 | 0.07180487  | 1.315817875  | 0.07180487  |
| Usp42 76800        | 1.315767833 | 0.302423474 | 1.51733978   | 0.154110183 |
| AU019823 270156    | 1.314945574 | 0.09904878  | 1.177226094  | 0.201026674 |
| Hsbp1l1 66255      | 1.314884361 | 0.145716093 | 1.445638676  | 0.05068447  |
| Scube1 64706       | 1.314429009 | 0.34207906  | -1.412498427 | 0.282553547 |
| Cps1 227231        | 1.313938251 | 0.224406693 | 1.627366723  | 0.110611638 |
| Ubxn7 224111       | 1.313740591 | 0.092348204 | 1.389015362  | 0.003732769 |
| Mbnl2 105559       | 1.313307469 | 0.132632986 | 1.410105756  | 0.039955139 |
| Col16a1 107581     | 1.312807881 | 0.101413835 | 1.498142595  | 0.005545439 |
| Slc22a3 20519      | 1.312772605 | 0.213019308 | -1.08143516  | 0.376620663 |
| Rlf 109263         | 1.312748899 | 0.194550914 | 1.851970532  | 0.020295597 |
| Eif2b4 13667       | 1.312612405 | 0.01220745  | 1.36576626   | 0.005983813 |
| Slc25a22 68267     | 1.312034606 | 0.06187691  | 1.312034606  | 0.06187691  |
| H3f3a 15078        | 1.311988626 | 0.00073643  | 1.31261444   | 0.000255742 |
| Gstp2 14869        | 1.311383903 | 0.259325007 | 1.992257008  | 0.047176275 |

|                     |             |             |              |             |
|---------------------|-------------|-------------|--------------|-------------|
| Il11ra1 16157       | 1.311289683 | 0.062890641 | 1.151451901  | 0.09325275  |
| Map3k5 26408        | 1.311227608 | 0.036637781 | 1.40852425   | 0.003965919 |
| Nop58 55989         | 1.311024479 | 0.166070322 | 1.19470213   | 0.26038195  |
| Ythdf2 213541       | 1.310672715 | 0.005857494 | 1.399373327  | 0.000990158 |
| Dsc2 13506          | 1.309823883 | 0.126301383 | 1.286913217  | 0.049619188 |
| Xrcc2 57434         | 1.309774895 | 0.311106927 | -1.096428588 | 0.417307835 |
| Npm3-ps1 108176     | 1.309760356 | 0.118310478 | 1.485768698  | 0.053007316 |
| Sarm1 237868        | 1.309578571 | 0.303473865 | 1.309578571  | 0.303473865 |
| Msln 56047          | 1.309578571 | 0.303473865 | 1.309578571  | 0.303473865 |
| Celf4 108013        | 1.309477819 | 0.388102049 | 2.327685805  | 0.199681503 |
| R74862 97423        | 1.30933296  | 0.105839337 | 1.496359664  | 0.037534667 |
| Jrk 16469           | 1.309165646 | 0.204488037 | 1.095259498  | 0.370001762 |
| Suv420h2 232811     | 1.309091816 | 0.006007346 | 1.223903313  | 0.002321666 |
| Pi4k2b 67073        | 1.309041294 | 0.187253353 | 1.516633707  | 0.107921726 |
| Jund 16478          | 1.308766777 | 0.130441884 | 1.015336965  | 0.463975821 |
| Ccng2 12452         | 1.308322813 | 0.169466721 | 1.099848205  | 0.34898321  |
| Sc1t1 67161         | 1.308170015 | 0.248322748 | 1.499685166  | 0.139667529 |
| Slc36a4 234967      | 1.308068514 | 0.369438342 | 1.487826752  | 0.329104443 |
| Rps14 20044         | 1.307978789 | 0.155089801 | 1.066101339  | 0.355642106 |
| Ugt1a9 394434       | 1.307610884 | 0.146922805 | 1.009297939  | 0.480239337 |
| Wnt5a 22418         | 1.307572893 | 0.237606545 | -1.006281101 | 0.491913716 |
| Sms 20603           | 1.307393534 | 0.129802487 | 1.307393534  | 0.129802487 |
| Atg16l2 73683       | 1.307390964 | 0.181569272 | 1.693303974  | 0.031489145 |
| Mapre1 13589        | 1.30661037  | 0.017557078 | 1.388840008  | 0.007744322 |
| Dtwd2 68857         | 1.306479311 | 0.249161664 | 1.056538931  | 0.444698072 |
| Kpna3 16648         | 1.306285693 | 0.136538455 | 1.14498485   | 0.273063259 |
| Pcgf2 22658         | 1.306182186 | 0.067437402 | 1.162751209  | 0.12896825  |
| Tmem229b 268567     | 1.306152991 | 0.259888614 | 1.761317976  | 0.105510624 |
| Hdac2 15182         | 1.305885187 | 0.022629627 | 1.305885187  | 0.022629627 |
| Lrrk2 66725         | 1.305735556 | 0.386700135 | 9.793016667  | 0.046113179 |
| Ttpa 50500          | 1.305565496 | 0.001004642 | 1.346746191  | 0.000715902 |
| Gm10012 100043160   | 1.30517788  | 0.100299915 | 1.30517788   | 0.100299915 |
| Pitpnm1 18739       | 1.305034219 | 0.134400637 | 1.154045034  | 0.250983365 |
| Nkg7 72310          | 1.304936512 | 0.245681173 | -1.020905539 | 0.474007924 |
| Twistnb 28071       | 1.304799939 | 0.168501732 | -1.045688966 | 0.404587289 |
| Hspa12b 72630       | 1.304487883 | 0.267306189 | -1.041970602 | 0.456531367 |
| Arnt 11865          | 1.304312481 | 0.113017713 | 1.468429271  | 0.00222741  |
| Ralb 64143          | 1.303803705 | 0.093573919 | 1.138954727  | 0.191933326 |
| Rps28 54127         | 1.303757119 | 0.133450255 | 1.11930878   | 0.282724936 |
| Zfp773 76373        | 1.303751035 | 0.30049496  | 1.303751035  | 0.30049496  |
| Phyhip 70911        | 1.303687472 | 0.407978939 | 1            | #DIV/0!     |
| 1810041L15Rik 72301 | 1.303687472 | 0.407978939 | 1            | #DIV/0!     |
| Ddx43 100048658     | 1.303687472 | 0.407978939 | 1            | #DIV/0!     |
| Rtkn 20166          | 1.303034302 | 0.128451058 | 1.303034302  | 0.128451058 |
| Il4i1 14204         | 1.302437028 | 0.346195753 | 2.653032424  | 0.103806698 |
| Csrp3 13009         | 1.302313659 | 0.125577048 | 1.376148653  | 0.108315994 |
| Hap1 15114          | 1.302226876 | 0.129178064 | 1.302226876  | 0.129178064 |
| Mcl1 17210          | 1.301780064 | 0.026407441 | 1.201322094  | 0.042046542 |
| Mgat5 107895        | 1.301425722 | 0.336198347 | 1.959518702  | 0.182816276 |
| 1110017F19Rik 68528 | 1.301388731 | 0.329558967 | 1.225643903  | 0.36366942  |
| Krtcap3 69815       | 1.301122059 | 0.29147     | 1.382105023  | 0.227181499 |
| Gm13253 664903      | 1.300718773 | 0.171014209 | 1.208828458  | 0.146615196 |
| Gspt2 14853         | 1.300691639 | 0.317752496 | 1.300691639  | 0.317752496 |

|                     |             |             |              |             |
|---------------------|-------------|-------------|--------------|-------------|
| Acsl4 50790         | 1.300679663 | 0.104056308 | 1.18128699   | 0.194254506 |
| Atp7a 11977         | 1.300564975 | 0.126540605 | 1.73915065   | 0.001533265 |
| Gpr162 14788        | 1.300485388 | 0.279143885 | 1.363385568  | 0.207085746 |
| Lrp6 16974          | 1.300442754 | 0.039087206 | 1.481612964  | 0.001245551 |
| Rpl10a 19896        | 1.300433953 | 0.097604545 | 1.17625131   | 0.195908269 |
| Zfp945 240041       | 1.300226889 | 0.108575121 | 1.428428166  | 0.03494535  |
| Nob1 67619          | 1.300128819 | 0.063138616 | 1.381837151  | 0.029800875 |
| Bax 12028           | 1.299808592 | 0.084768013 | 1.299808592  | 0.084768013 |
| D1Ert622e 52392     | 1.299771578 | 0.205782693 | 1.817992916  | 0.018256542 |
| Gmps 229363         | 1.299729997 | 0.017385593 | 1.371347744  | 0.00413943  |
| Trp53inp1 60599     | 1.299601442 | 0.056903687 | 1.597075844  | 0.000163372 |
| Wbscr27 79565       | 1.299473027 | 0.011518323 | 1.245244279  | 0.002024828 |
| Nuak1 77976         | 1.299449497 | 0.270676545 | 1.299449497  | 0.270676545 |
| Tbxa2r 21390        | 1.299076529 | 0.215684564 | 1.698501371  | 0.058561073 |
| Syt14 27359         | 1.299002048 | 0.353766015 | 2.384759398  | 0.152225637 |
| Ctse 13034          | 1.298609387 | 0.032812268 | 1.189019495  | 0.051362471 |
| Egfr 13649          | 1.298530526 | 0.075916422 | 1.285730312  | 0.046835409 |
| Pla2g12a 66350      | 1.298159264 | 0.024405851 | 1.298159264  | 0.024405851 |
| Lmnb1 16906         | 1.298086872 | 0.146644951 | 1.298086872  | 0.146644951 |
| Lrp12 239393        | 1.298057362 | 0.301449041 | 1.151040157  | 0.376503807 |
| Dram1 71712         | 1.297796403 | 0.359714671 | 2.714109596  | 0.129040948 |
| Hilpda 69573        | 1.29744457  | 0.204667867 | 1.160950271  | 0.174992222 |
| Zfp322a 218100      | 1.297327839 | 0.198392599 | 1.050009659  | 0.423312355 |
| Dph5 69740          | 1.297278659 | 0.127592199 | 1.477920335  | 0.054843354 |
| Slamf9 98365        | 1.29683233  | 0.325374571 | 1.29683233   | 0.325374571 |
| Tmem161b 72745      | 1.296741569 | 0.314291111 | -1.31535848  | 0.209942938 |
| Polr2l 66491        | 1.296596074 | 0.087304017 | 1.169188178  | 0.179001915 |
| Rps24 20088         | 1.29653728  | 0.212179659 | 1.001531293  | 0.497303756 |
| Hoxa4 15401         | 1.29651352  | 0.28569814  | 1.543052249  | 0.147966979 |
| Kcnc6 52150         | 1.296226506 | 0.264717584 | -1.025748713 | 0.472639823 |
| Asb2 65256          | 1.296031159 | 0.235161176 | 1.825883773  | 0.006194697 |
| Qtrt1 60507         | 1.295998223 | 0.133538899 | 1.46676914   | 0.064572029 |
| Dcaf12 68970        | 1.295846812 | 0.046005225 | 1.295846812  | 0.046005225 |
| 5930416l19Rik 72440 | 1.295674305 | 0.061647724 | 1.173078654  | 0.125941386 |
| Ankrd33b 67434      | 1.2954062   | 0.123262911 | 1.450924916  | 0.02628547  |
| Ttc23 67009         | 1.295403056 | 0.013146872 | 1.286446918  | 0.004625176 |
| Ptbp2 56195         | 1.295147939 | 0.33462305  | 1.295147939  | 0.33462305  |
| Rnf214 235315       | 1.295014824 | 0.038458357 | 1.295014824  | 0.038458357 |
| Wfdc15b 192201      | 1.294634254 | 0.390120286 | 1.633421429  | 0.334663434 |
| Scml4 268297        | 1.294625137 | 0.361359982 | 2.596338175  | 0.142234751 |
| Cpeb2 231207        | 1.2945435   | 0.246237371 | 1.708312514  | 0.055688574 |
| Sla2 77799          | 1.2944655   | 0.354060314 | 1.716508186  | 0.234913993 |
| Slc17a8 216227      | 1.294452852 | 0.240537901 | 1.778380364  | 0.058923634 |
| Utp11l 67205        | 1.29432847  | 0.131592169 | 1.568334176  | 0.019766562 |
| Rpl37a 19981        | 1.294285854 | 0.21008009  | 1.151651667  | 0.197164371 |
| Hhat 226861         | 1.294158081 | 0.318403107 | 1.601299082  | 0.165097903 |
| Cd9 12527           | 1.293793098 | 0.185616347 | 1.701754199  | 0.020512222 |
| Cnnm2 94219         | 1.293585153 | 0.117618409 | 1.128403071  | 0.247791745 |
| Sco1 52892          | 1.293493014 | 0.058613217 | 1.250239357  | 0.097986723 |
| Ddx52 78394         | 1.292670181 | 0.137622113 | 1.292670181  | 0.137622113 |
| Myom1 17929         | 1.292436155 | 0.17926307  | -1.024729294 | 0.453497657 |
| Dmxl2 235380        | 1.292268761 | 0.228126255 | 1.729034679  | 0.056108548 |
| Slc19a1 20509       | 1.291957851 | 0.018687497 | 1.291957851  | 0.018687497 |

|                      |             |             |              |             |
|----------------------|-------------|-------------|--------------|-------------|
| Tnpo1 238799         | 1.291598191 | 0.241062655 | 1.481447118  | 0.098077756 |
| Hmox1 15368          | 1.291425314 | 0.180548714 | 1.29744383   | 0.134372834 |
| Rhbdf2 217344        | 1.291278176 | 0.030420868 | 1.11096233   | 0.089140707 |
| Uqcrh 66576          | 1.291176578 | 0.121881842 | 1.103156411  | 0.262495948 |
| Ip6k2 76500          | 1.291071243 | 0.036904147 | 1.379628034  | 0.007912898 |
| Rad1 19355           | 1.29101872  | 0.184849115 | 1.280311884  | 0.156845426 |
| Llg1 16897           | 1.290795171 | 0.162641948 | 1.045200301  | 0.38588014  |
| Amy1 11722           | 1.29054254  | 0.028500358 | 1.174319335  | 0.04607237  |
| Rnf219 72486         | 1.290027758 | 0.305396813 | 1.670431061  | 0.148097804 |
| Smc2 14211           | 1.289931855 | 0.359863659 | -1.185670432 | 0.415689945 |
| Pigv 230801          | 1.28953103  | 0.112908708 | 1.510808273  | 0.02269094  |
| Zcrb1 67197          | 1.289439653 | 0.11019962  | 1.289439653  | 0.11019962  |
| Psm9 67151           | 1.289403346 | 0.024280808 | 1.289403346  | 0.024280808 |
| Oraov1 72284         | 1.288904346 | 0.072343868 | 1.331785367  | 0.02039887  |
| Mudeng 74385         | 1.288825606 | 0.299189023 | 1.809905415  | 0.136149862 |
| Ddx3x 13205          | 1.288814754 | 0.127557692 | 1.474223726  | 0.015287814 |
| Terf2 21750          | 1.288565419 | 0.046015673 | 1.184602268  | 0.103145943 |
| Rab21 216344         | 1.288440697 | 0.06520757  | 1.080797491  | 0.243316103 |
| Plin4 57435          | 1.288330584 | 0.01832248  | 1.201051933  | 0.026623928 |
| Sh3gl1 20405         | 1.287897598 | 0.004639181 | 1.294457707  | 0.001541191 |
| Grhl1 195733         | 1.287650334 | 0.355901861 | -1.123925492 | 0.440140822 |
| Tuba1a 22142         | 1.28757012  | 0.237870216 | 1.633372865  | 0.099194172 |
| Hsp90aa1 15519       | 1.287556334 | 0.060118096 | 1.261890023  | 0.057279333 |
| Ryk 20187            | 1.28719371  | 0.007751035 | 1.153108268  | 0.00433372  |
| Gtf2h1 14884         | 1.287007318 | 0.049142878 | 1.537809388  | 0.00013957  |
| F3 14066             | 1.286804593 | 0.282694682 | 1.081664273  | 0.423683423 |
| 4931406P16Rik 233103 | 1.286632905 | 0.139930454 | 1.702802514  | 0.003574371 |
| Sertad1 55942        | 1.2861694   | 0.213578138 | -1.11879517  | 0.225970574 |
| Kctd3 226823         | 1.28612668  | 0.118528782 | 1.28612668   | 0.118528782 |
| Fkbp5 14229          | 1.285516276 | 0.140557687 | 1.285516276  | 0.140557687 |
| Rpp40 208366         | 1.285442964 | 0.099928066 | 1.341285012  | 0.090211124 |
| Pigx 72084           | 1.285412196 | 0.097177165 | 1.285412196  | 0.097177165 |
| St6galnac2 20446     | 1.285392311 | 0.333613732 | 1.426600316  | 0.296746291 |
| Rplp2 67186          | 1.285391623 | 0.215661171 | 1.102929402  | 0.268775755 |
| Taf13 99730          | 1.285321685 | 0.044537329 | 1.263008791  | 0.037927078 |
| Gm4794 215895        | 1.285239263 | 0.355460197 | 1.612368991  | 0.26211305  |
| Usp27x 54651         | 1.285109295 | 0.179754251 | 1.480663267  | 0.094752878 |
| Mrpl40 18100         | 1.284947273 | 0.005787461 | 1.326518909  | 0.004684033 |
| Ehd2 259300          | 1.284730092 | 0.142790782 | 1.284730092  | 0.142790782 |
| Armc8 74125          | 1.284642098 | 0.074773353 | 1.443424593  | 0.018226996 |
| Cd34 12490           | 1.283925672 | 0.333547786 | 1.333920548  | 0.271050335 |
| Cyp17a1 13074        | 1.28381985  | 0.208748069 | 1.00340356   | 0.493521247 |
| Bace1 23821          | 1.283636434 | 0.174587316 | 1.560680393  | 0.050145655 |
| Dynlt1b 21648        | 1.283328158 | 0.201745811 | 1.32141306   | 0.099853631 |
| Apoo 68316           | 1.283266495 | 0.223300697 | 1.046745975  | 0.439090039 |
| Calhm2 72691         | 1.283060828 | 0.291239856 | -1.279452049 | 0.246895161 |
| Uchl3 50933          | 1.28290389  | 0.143070555 | 1.634817265  | 0.010106274 |
| 4732471D19Rik 319719 | 1.2828841   | 0.291350207 | -1.179361859 | 0.292541716 |
| Tbc1d8 54610         | 1.282752601 | 0.127095558 | 1.028932166  | 0.422228209 |
| 2310008H09Rik 66356  | 1.282580049 | 0.000312447 | 1.22891572   | 0.000141346 |
| Tmem203 227615       | 1.282518519 | 0.008016988 | 1.194436129  | 0.008124054 |
| Tbl2 27368           | 1.282470152 | 0.012009457 | 1.22323835   | 0.011160277 |
| Leprel4 66180        | 1.282436085 | 0.267349622 | 1.966835104  | 0.031157641 |

|                      |             |             |              |             |
|----------------------|-------------|-------------|--------------|-------------|
| Epsti1 108670        | 1.282377439 | 0.176279145 | 1.714252037  | 0.013654318 |
| Wdr77 70465          | 1.282239797 | 0.032011077 | 1.406717806  | 0.003532002 |
| Fam180a 208164       | 1.28220422  | 0.318987859 | 1.078297343  | 0.440841645 |
| Esf1 66580           | 1.282058498 | 0.214010811 | 1.881937229  | 0.006225763 |
| Ihh 16147            | 1.281817362 | 0.265211809 | 1.281817362  | 0.265211809 |
| Fbxo17 50760         | 1.281711601 | 0.294668054 | 1.525330155  | 0.155435693 |
| Atp6v1g1 66290       | 1.281638801 | 0.046739449 | 1.336700026  | 0.010991427 |
| Camsap1 227634       | 1.281605029 | 0.101044509 | 1.390314674  | 0.01553566  |
| Cpt1b 12895          | 1.281357931 | 0.084285966 | 1.077126492  | 0.295076115 |
| Lat 16797            | 1.280907509 | 0.293708485 | 1.635050281  | 0.17266186  |
| Cyp4a31 666168       | 1.280414533 | 0.187291619 | 1.13295043   | 0.314773395 |
| LOC106740 106740     | 1.280373388 | 0.356012866 | 1.964827528  | 0.202463383 |
| Map4k4 26921         | 1.279967804 | 0.164945931 | 1.668794333  | 0.005033898 |
| Med12l 329650        | 1.279625103 | 0.360844391 | -1.070040211 | 0.449808949 |
| Rnpc3 67225          | 1.279454384 | 0.23514239  | 1.902110763  | 0.020343554 |
| Rerg 232441          | 1.279357869 | 0.227683703 | 1.19422052   | 0.135741673 |
| Uaca 72565           | 1.279206963 | 0.131266153 | 1.131173416  | 0.266153431 |
| E2f8 108961          | 1.27918947  | 0.112022676 | 1.13122635   | 0.233843583 |
| Hic1 15248           | 1.279014449 | 0.286870241 | 1.26911991   | 0.284628489 |
| Hsf2 15500           | 1.278664328 | 0.110048366 | 1.165705918  | 0.214030584 |
| Mri1 67873           | 1.278598594 | 0.077827304 | 1.278598594  | 0.077827304 |
| Zfp830 66983         | 1.2785636   | 0.021564867 | 1.326944029  | 0.003337026 |
| Ccdc115 69668        | 1.277762219 | 0.021169963 | 1.282214351  | 0.009238137 |
| Gmnn 57441           | 1.277592662 | 0.148825831 | 1.277592662  | 0.148825831 |
| Epdr1 105298         | 1.277499476 | 0.361701497 | 3.041166332  | 0.075689291 |
| Nudt16 75686         | 1.277348645 | 0.02906797  | 1.389585957  | 0.005472633 |
| Idh3a 67834          | 1.277152445 | 0.137906311 | 1.595860269  | 0.008170057 |
| Usp33 170822         | 1.277005632 | 0.098900606 | 1.496812282  | 0.01036499  |
| Tmod1 21916          | 1.276805907 | 0.186579066 | 1.119481874  | 0.324328707 |
| Rusc1 72296          | 1.276792943 | 0.103542422 | 1.424079618  | 0.014363489 |
| Yy1 22632            | 1.276533327 | 0.280469378 | -1.079012725 | 0.414661706 |
| Anapc10 68999        | 1.276048879 | 0.26388262  | 1.069175846  | 0.434337871 |
| D33005016Rik 414115  | 1.275998931 | 0.254775449 | -1.047990959 | 0.434345656 |
| Ccdc58 381045        | 1.275701924 | 0.039959212 | 1.36709544   | 0.00662747  |
| Pgm1 66681           | 1.275641193 | 0.2877669   | 1.629854466  | 0.160052382 |
| Rgs2 19735           | 1.275481234 | 0.125348805 | 1.299530416  | 0.074435692 |
| Unc5b 107449         | 1.275357982 | 0.078074705 | 1.182278703  | 0.155432277 |
| Trappc6a 67091       | 1.27507642  | 0.066613585 | 1.27507642   | 0.066613585 |
| Gtf2h4 14885         | 1.275012314 | 0.039735641 | 1.380561161  | 0.012466469 |
| Rpl13a 22121         | 1.274978556 | 0.205055614 | 1.012224795  | 0.476494282 |
| Herpud1 64209        | 1.274931541 | 0.141020456 | 1.51074395   | 0.031972921 |
| Plac8 231507         | 1.274885839 | 0.128290791 | 1.190158425  | 0.219210404 |
| Srgn 19073           | 1.274750768 | 0.077960605 | 1.370066849  | 0.02729245  |
| Dnajb1 81489         | 1.27465715  | 0.089117427 | 1.429574569  | 0.003107344 |
| Micall2 231830       | 1.274366232 | 0.196411751 | 1.351895526  | 0.127286446 |
| Cct8 12469           | 1.274141294 | 0.012628308 | 1.203573327  | 0.020060727 |
| Cdc25a 12530         | 1.274133149 | 0.276954553 | 1.274133149  | 0.276954553 |
| Cited4 56222         | 1.273832238 | 0.263159957 | 1.520254552  | 0.097756019 |
| E330009J07Rik 243780 | 1.273324632 | 0.230992257 | 1.273324632  | 0.230992257 |
| Ces1b 382044         | 1.27321326  | 0.142699229 | -1.035427045 | 0.306942854 |
| Ranbp9 56705         | 1.273134466 | 0.181628215 | 1.737184613  | 0.003753421 |
| Rbm8a 60365          | 1.272714209 | 0.027396108 | 1.327332708  | 0.013860822 |
| Rps12 20042          | 1.272298041 | 0.055208805 | 1.190204517  | 0.112441828 |

|                     |             |             |              |             |
|---------------------|-------------|-------------|--------------|-------------|
| Sac3d1 66406        | 1.272204804 | 0.050710962 | 1.273049243  | 0.004934954 |
| Arl16 70317         | 1.271741806 | 0.163820442 | 1.271741806  | 0.163820442 |
| Sema3c 20348        | 1.271603616 | 0.414863585 | -2.8         | 0.173296754 |
| Rsl24d1 225215      | 1.271552861 | 0.056203784 | 1.172432061  | 0.113875697 |
| Gstp1 14870         | 1.271354677 | 0.228660311 | 1.355342765  | 0.077752591 |
| Lpin1 14245         | 1.270998847 | 0.257276139 | 1.193736368  | 0.256131255 |
| Tomm34 67145        | 1.270969341 | 0.035584918 | 1.270969341  | 0.035584918 |
| Al428936 233066     | 1.270648223 | 0.329591654 | 1.073204424  | 0.451406879 |
| Rnf41 67588         | 1.270556237 | 0.092269985 | 1.132771389  | 0.190853416 |
| Gm6484 624219       | 1.270555665 | 0.334717364 | -1.62315939  | 0.043210847 |
| Rbfox3 52897        | 1.270541601 | 0.273567053 | 1.020787432  | 0.460858458 |
| Htra3 78558         | 1.270530537 | 0.198508936 | 1.262785654  | 0.111614711 |
| St8sia1 20449       | 1.27049673  | 0.388481082 | 1.264185714  | 0.40907038  |
| Dapk2 13143         | 1.270280682 | 0.104529301 | 1.40962116   | 0.01558745  |
| Lingo1 235402       | 1.270173511 | 0.400672151 | 4.577104461  | 0.132622695 |
| Sox12 20667         | 1.269739036 | 0.05088207  | 1.176140252  | 0.104006185 |
| Plac9 211623        | 1.269345693 | 0.288131551 | -1.178804432 | 0.255346841 |
| Slc35f5 74150       | 1.269206089 | 0.059843105 | 1.244280518  | 0.026484847 |
| 2610002I17Rik 72341 | 1.269177094 | 0.259471335 | 1.100873314  | 0.354544757 |
| Cldn1 12737         | 1.269144181 | 0.166765479 | 1.269144181  | 0.166765479 |
| 4932415G12Rik 67723 | 1.268730175 | 0.295597274 | -1.022205596 | 0.480336809 |
| 1700094D03Rik 73545 | 1.268725017 | 0.319169413 | -1.327083648 | 0.152383082 |
| Tbc1d7 67046        | 1.268681199 | 0.082939107 | 1.51518745   | 0.004501555 |
| Pum2 80913          | 1.268673299 | 0.04099643  | 1.346041229  | 0.003764333 |
| Zfp369 170936       | 1.268640853 | 0.371855314 | 1.268640853  | 0.371855314 |
| Bin1 30948          | 1.268566771 | 0.134254746 | 1.272308802  | 0.058355935 |
| Adam33 110751       | 1.268414714 | 0.339416302 | -1.252399805 | 0.336793742 |
| Thg1l 66628         | 1.268237874 | 0.285371268 | 1.061665172  | 0.437870818 |
| Bri3bp 76809        | 1.268192004 | 0.027186612 | 1.200025049  | 0.056952373 |
| Rinl 320435         | 1.268127923 | 0.269499734 | 1.017289461  | 0.482093556 |
| Akirin2 433693      | 1.268046746 | 0.024591756 | 1.199060471  | 0.051661147 |
| Eif2b3 108067       | 1.267869318 | 0.215380452 | -1.107908897 | 0.292979294 |
| Hist2h2be 319190    | 1.267358307 | 0.241153855 | 1.039861831  | 0.45142649  |
| Ccdc163 68394       | 1.267336621 | 0.259944077 | 2.020904544  | 0.013016348 |
| Fam50b 108161       | 1.267208703 | 0.414822897 | -7.703466667 | 0.044331703 |
| Fgr 14191           | 1.267081816 | 0.220423381 | 1.515765937  | 0.032032161 |
| Gm12166 100039624   | 1.266880331 | 0.288651989 | 1.062154148  | 0.43852334  |
| Mgat2 217664        | 1.266838914 | 0.157549265 | 1.267734096  | 0.09378979  |
| Ms4a4d 66607        | 1.266628587 | 0.18636661  | 1.266628587  | 0.18636661  |
| Rnaseh2b 67153      | 1.266607527 | 0.21800673  | 1.294282978  | 0.150916351 |
| Dnajc15 66148       | 1.266382767 | 0.1014847   | 1.266382767  | 0.1014847   |
| Cage1 71213         | 1.265975449 | 0.35084738  | 1.265975449  | 0.35084738  |
| Tas1r1 110326       | 1.265975449 | 0.35084738  | 1.265975449  | 0.35084738  |
| Zfp560 434377       | 1.265937252 | 0.241100924 | 1.265937252  | 0.241100924 |
| Lpar6 67168         | 1.265895964 | 0.107486549 | 1.444578996  | 0.026465671 |
| Polb 18970          | 1.265750612 | 0.132003817 | 1.349907414  | 0.101097691 |
| Slc13a5 237831      | 1.265463244 | 0.288160701 | 1.516168308  | 0.128180681 |
| Sprn 212518         | 1.265445051 | 0.231422777 | 1.404412836  | 0.14034196  |
| Rad9b 231724        | 1.265173454 | 0.230759763 | 1.582310324  | 0.085033782 |
| Arhgap11a 228482    | 1.264880129 | 0.252657212 | 1.21513463   | 0.265243956 |
| Nfkbil1 18038       | 1.264835183 | 0.280522112 | -1.128067647 | 0.329804968 |
| Mcart1 230125       | 1.264724312 | 0.076477187 | 1.280731601  | 0.04373857  |
| 1110007C09Rik 68480 | 1.264183719 | 0.073051068 | 1.177094144  | 0.141117734 |



|                         |             |             |              |             |
|-------------------------|-------------|-------------|--------------|-------------|
| Zfp511 69752            | 1.263987633 | 0.132664449 | 1.354639138  | 0.075626285 |
| Rpl18 19899             | 1.263958369 | 0.197175567 | 1.189959809  | 0.178058253 |
| Akap2 11641             | 1.263641191 | 0.037171126 | 1.263641191  | 0.037171126 |
| Tmem139 109218          | 1.263565863 | 0.396012066 | 1.59986242   | 0.353323128 |
| 6330409N04Rik 66674     | 1.263464609 | 0.14546113  | 1.335235565  | 0.029657642 |
| Hprt 15452              | 1.263439124 | 0.059066386 | 1.468669787  | 0.003271988 |
| Plin5 66968             | 1.263306838 | 0.060810534 | 1.202470841  | 0.11658769  |
| Prune2 353211           | 1.26328075  | 0.374045171 | 1.26328075   | 0.374045171 |
| Zfp618 72701            | 1.26328075  | 0.374045171 | 1.26328075   | 0.374045171 |
| Rgs11 50782             | 1.263086079 | 0.40305271  | 1            | #DIV/0!     |
| F630028O10Rik 100038363 | 1.263086079 | 0.40305271  | 1            | #DIV/0!     |
| Oaz3 53814              | 1.263086079 | 0.40305271  | 1            | #DIV/0!     |
| Fam19a1 320265          | 1.263086079 | 0.40305271  | 1            | #DIV/0!     |
| Gm3285 100041351        | 1.263086079 | 0.40305271  | 1            | #DIV/0!     |
| 1810033B17Rik 69189     | 1.263086079 | 0.40305271  | 1            | #DIV/0!     |
| Mboat1 218121           | 1.263086079 | 0.40305271  | 1            | #DIV/0!     |
| A030009H04Rik 80515     | 1.263014841 | 0.386157635 | -1.363516108 | 0.370712423 |
| Tgfr2 21813             | 1.263010095 | 0.235555801 | 1.049345712  | 0.438140878 |
| Bbip1 66360             | 1.262942118 | 0.086148389 | 1.388422766  | 0.011122374 |
| Nup205 70699            | 1.262829896 | 0.289338624 | 2.00366706   | 0.034966747 |
| Lcmt2 329504            | 1.262493736 | 0.082168963 | 1.381068546  | 0.012593806 |
| Dnase2a 13423           | 1.262439179 | 0.15054663  | 1.282431634  | 0.096690824 |
| B020018G12Rik 545388    | 1.262403994 | 0.126280298 | 1.395635595  | 0.032391857 |
| Gm6762 627480           | 1.262074581 | 0.289043436 | 1.48831481   | 0.203074199 |
| 2210021J22Rik 72355     | 1.261775966 | 0.098648886 | 1.181586369  | 0.123474688 |
| Flcn 216805             | 1.261703028 | 0.046866711 | 1.165503781  | 0.090995254 |
| Pus7 78697              | 1.261135241 | 0.048214783 | 1.173962495  | 0.097721933 |
| Mppe1 225651            | 1.26109192  | 0.147892885 | -1.003909312 | 0.489677631 |
| Filip1 70598            | 1.260297682 | 0.409958295 | -3.967316667 | 0.09324139  |
| 4430402I18Rik 381218    | 1.259914203 | 0.293987773 | 1.067027507  | 0.435388417 |
| Fh1 14194               | 1.259536076 | 0.081016275 | 1.279323087  | 0.037091131 |
| 5730455P16Rik 70591     | 1.259258205 | 0.152520768 | 1.557678019  | 0.009908643 |
| 2510009E07Rik 72190     | 1.259257782 | 0.109646755 | 1.219995357  | 0.071253745 |
| Ptges3 56351            | 1.259186443 | 0.110545389 | 1.188040503  | 0.115549505 |
| Vasp 22323              | 1.259099106 | 0.024659663 | 1.184577555  | 0.046266529 |
| Tmco7 272538            | 1.259095266 | 0.129478084 | 1.156654866  | 0.23820214  |
| Mtfmt 69606             | 1.258997758 | 0.144824639 | 1.432583494  | 0.015564548 |
| 1700020I14Rik 66602     | 1.258930963 | 0.074674412 | 1.240577443  | 0.032674346 |
| Npm2 328440             | 1.258566919 | 0.409043451 | 4.37142      | 0.173296754 |
| Birc2 11797             | 1.258154825 | 0.084132852 | 1.111986026  | 0.169876097 |
| Fyn 14360               | 1.258091137 | 0.088065632 | 1.187295912  | 0.15513608  |
| Soat1 20652             | 1.257942179 | 0.181218505 | 1.257942179  | 0.181218505 |
| Anxa5 11747             | 1.257872577 | 0.071473909 | 1.182498728  | 0.051393185 |
| Man1c1 230815           | 1.257746997 | 0.03011664  | 1.245480488  | 0.018686807 |
| Ass1 11898              | 1.257648142 | 0.046960211 | 1.156243996  | 0.086263546 |
| Mtrr 210009             | 1.257595185 | 0.047351307 | 1.141108333  | 0.065586948 |
| Zfp14 243906            | 1.257328325 | 0.392927559 | -2.303330578 | 0.124495049 |
| Slc37a4 14385           | 1.25711406  | 0.052276391 | 1.366109503  | 0.003272164 |
| Gm5643 434858           | 1.257079443 | 0.11878695  | 1.027076331  | 0.423133771 |
| Gpsm2 76123             | 1.25701364  | 0.191037724 | 1.221727887  | 0.106256821 |
| Vamp3 22319             | 1.256795201 | 0.120740057 | 1.224527394  | 0.167401304 |
| Ei24 13663              | 1.256664413 | 0.007119934 | 1.313484772  | 0.000946715 |
| Map3k6 53608            | 1.256521841 | 0.156217178 | 1.387298659  | 0.058918305 |

|                      |             |             |              |             |
|----------------------|-------------|-------------|--------------|-------------|
| 4930427A07Rik 104732 | 1.256355292 | 0.402929688 | 1.724477316  | 0.34172029  |
| 8430408G22Rik 213393 | 1.256057907 | 0.205935064 | 1.256057907  | 0.205935064 |
| Prkcz 18762          | 1.255916852 | 0.121272106 | 1.357759039  | 0.076614303 |
| Galnt6 207839        | 1.25584532  | 0.307006359 | 2.273540547  | 0.013912409 |
| Hist1h1d 14957       | 1.255620669 | 0.367182345 | 1.255620669  | 0.367182345 |
| Elov15 68801         | 1.255141233 | 0.223741957 | 1.145228295  | 0.281429585 |
| Rps3a 20091          | 1.254539351 | 0.077434059 | 1.16570862   | 0.155344244 |
| Alpl 11647           | 1.254472025 | 0.05848423  | 1.207932714  | 0.032156749 |
| Foxm1 14235          | 1.254095304 | 0.365601524 | 2.159052936  | 0.162310568 |
| Arhgap28 268970      | 1.254079719 | 0.378023984 | 1.369634198  | 0.361484993 |
| Enpp6 320981         | 1.253923287 | 0.353046538 | 1.763945274  | 0.212162417 |
| Cdc42ep5 58804       | 1.253911075 | 0.216771717 | 1.253911075  | 0.216771717 |
| Prdm11 100042784     | 1.253880866 | 0.412051413 | 4.57358      | 0.173296754 |
| Lsm11 72290          | 1.253820553 | 0.195974841 | 1.577867739  | 0.031393608 |
| Msr3 320183          | 1.253803037 | 0.249934998 | 1.280838855  | 0.215819773 |
| Notch4 18132         | 1.253634321 | 0.229035794 | 1.701802558  | 0.025275758 |
| Htati2 53415         | 1.253614895 | 0.043687215 | 1.285795333  | 0.020108346 |
| Gm6623 625785        | 1.25343601  | 0.214359498 | 1.437029975  | 0.071543027 |
| Mfge8 17304          | 1.253034615 | 0.183052456 | 1.038463906  | 0.416027824 |
| Irf4 16364           | 1.25300195  | 0.378270519 | 1.25300195   | 0.378270519 |
| Hoxa1 15394          | 1.25300195  | 0.378270519 | 1.25300195   | 0.378270519 |
| Gm7102 633057        | 1.25300195  | 0.378270519 | 1.25300195   | 0.378270519 |
| Rac3 170758          | 1.2526589   | 0.303165447 | 1.495353096  | 0.150432088 |
| Atp6v1e1 11973       | 1.252582855 | 0.01833258  | 1.199511278  | 0.039290397 |
| Cltb 74325           | 1.252319965 | 0.060007903 | 1.16513953   | 0.122591397 |
| Rps15a 267019        | 1.252200044 | 0.161667347 | 1.094117045  | 0.327499085 |
| Itgb1bp1 16413       | 1.252004941 | 0.23753116  | -1.140354543 | 0.103716268 |
| B3gnt2 53625         | 1.251757477 | 0.184998633 | 1.251757477  | 0.184998633 |
| F11r 16456           | 1.251566486 | 0.060334122 | 1.450305124  | 0.00232154  |
| 1600012F09Rik 67008  | 1.251513905 | 0.206006366 | 1.251513905  | 0.206006366 |
| 2810008M24Rik 75616  | 1.251338955 | 0.272283928 | 1.687520235  | 0.08316994  |
| Pcmt1 18537          | 1.250660701 | 0.037377605 | 1.279601932  | 0.000668061 |
| Zfand5 22682         | 1.25065477  | 0.145315409 | 1.25065477   | 0.145315409 |
| Actr6 67019          | 1.250643246 | 0.275495842 | 1.547516592  | 0.146288143 |
| 1700040I03Rik 73327  | 1.250381284 | 0.096696328 | 1.174717661  | 0.178572879 |
| Mesdc1 80889         | 1.250297827 | 0.199827889 | 1.111327604  | 0.282592645 |
| Ddx10 77591          | 1.250231061 | 0.16750185  | 1.577719994  | 0.009288739 |
| Got1 14718           | 1.250176388 | 0.156124231 | 1.084187569  | 0.329089499 |
| Ppm1d 53892          | 1.249594015 | 0.233238958 | 1.249594015  | 0.233238958 |
| Dpep1 13479          | 1.249430222 | 0.335030745 | 2.132131673  | 0.027709587 |
| Atf4 11911           | 1.249319687 | 0.026679668 | 1.216877423  | 0.05290656  |
| Espn 56226           | 1.249112559 | 0.285526175 | 1.580556004  | 0.145538939 |
| Spata1 70951         | 1.248799418 | 0.368642454 | -1.529725169 | 0.230937166 |
| Arg1 11846           | 1.24859995  | 0.175867707 | 1.40968992   | 0.091419364 |
| Orc4 26428           | 1.248578044 | 0.268066965 | 1.433338981  | 0.18757837  |
| Obfc1 108689         | 1.2485057   | 0.25443861  | 1.008738461  | 0.48873456  |
| Nop16 28126          | 1.248200753 | 0.030209259 | 1.107953769  | 0.098595922 |
| Gm14085 381417       | 1.248142057 | 0.405483337 | 3.15         | 0.173296754 |
| Kpna1 16646          | 1.247938474 | 0.174066291 | 1.2886688    | 0.109198174 |
| Mbtd1 103537         | 1.247899593 | 0.100333637 | 1.182911649  | 0.110651864 |
| Fam49b 223601        | 1.247853207 | 0.289680781 | 1.123595736  | 0.37538781  |
| Arf5 11844           | 1.247560096 | 0.14151771  | -1.020373449 | 0.406118137 |
| Ssr2 66256           | 1.247528543 | 0.015222938 | 1.249551884  | 0.005506476 |

|                      |             |             |              |             |
|----------------------|-------------|-------------|--------------|-------------|
| Ncoa4 27057          | 1.247361263 | 0.198703724 | 1.645952665  | 0.015356014 |
| Hsph1 15505          | 1.247344359 | 0.144752508 | 1.083095397  | 0.311967479 |
| Scpep1 74617         | 1.247092563 | 0.007136894 | 1.202599171  | 0.015850126 |
| A130010J15Rik 319266 | 1.247076886 | 0.18673329  | 1.440639246  | 0.082795565 |
| Mrpl47 74600         | 1.247074245 | 0.066162826 | 1.368588795  | 0.002331176 |
| Lgmn 19141           | 1.24674991  | 0.02860161  | 1.209646999  | 0.055601554 |
| Pdlim4 30794         | 1.246678697 | 0.195383777 | 1.410231791  | 0.063767778 |
| C6 12274             | 1.246655011 | 0.114607779 | 1.514180507  | 0.003908266 |
| Necab2 117148        | 1.246573333 | 0.408482923 | 1            | #DIV/0!     |
| Pcdhb10 93881        | 1.246573333 | 0.408482923 | 1            | #DIV/0!     |
| Rab37 58222          | 1.246573333 | 0.408482923 | 1            | #DIV/0!     |
| Rnf180 71816         | 1.246573333 | 0.408482923 | 1            | #DIV/0!     |
| Pde3a 54611          | 1.246573333 | 0.408482923 | 1            | #DIV/0!     |
| Ttll7 70892          | 1.246573333 | 0.408482923 | 1            | #DIV/0!     |
| Ets2 23872           | 1.246274143 | 0.041952771 | 1.103412587  | 0.143590551 |
| Hsp90ab1 15516       | 1.246110697 | 0.001941279 | 1.290250042  | 0.000226811 |
| Itgb3 16416          | 1.246062697 | 0.105389941 | 1.312560339  | 0.007627088 |
| Mrc2 17534           | 1.246037234 | 0.166565294 | 1.268222522  | 0.099386432 |
| Dnalc4 54152         | 1.246007038 | 0.123331004 | 1.342379964  | 0.055421474 |
| Fras1 231470         | 1.245628048 | 0.362016075 | -1.621128921 | 0.098811758 |
| Rftn1 76438          | 1.245570675 | 0.261270473 | 1.245570675  | 0.261270473 |
| Rbm14 56275          | 1.245407074 | 0.156555328 | 1.119340728  | 0.295366458 |
| Ddhd1 114874         | 1.245112447 | 0.147503479 | 1.416535489  | 0.022191437 |
| Tdo2 56720           | 1.245040772 | 0.150505153 | 1.245040772  | 0.150505153 |
| A1646023 192734      | 1.244761628 | 0.414449858 | -4.016833333 | 0.093227909 |
| Rbpms 19663          | 1.244664298 | 0.067992499 | 1.149352622  | 0.138941827 |
| Ece2 107522          | 1.244430793 | 0.092293835 | 1.317501065  | 0.048618966 |
| Akap5 238276         | 1.244374964 | 0.286120969 | 1.08257927   | 0.355311505 |
| Cdk12 69131          | 1.244302288 | 0.098104268 | 1.365723386  | 0.014726678 |
| 2010320M18Rik 72093  | 1.244038056 | 0.195640567 | 1.063103343  | 0.380283445 |
| Entpd2 12496         | 1.243939742 | 0.152866812 | -1.004356106 | 0.486840102 |
| Rpsa 16785           | 1.243759669 | 0.192426332 | 1.038157498  | 0.422828288 |
| Il3ra 16188          | 1.243376492 | 0.27050209  | 1.11039165   | 0.288954643 |
| Zfp775 243372        | 1.243269453 | 0.172906434 | 1.091226163  | 0.339696916 |
| 2310004I24Rik 66358  | 1.243251776 | 0.108160366 | 1.178309684  | 0.179266755 |
| Zfp420 233058        | 1.242959609 | 0.380557468 | 1.22753158   | 0.397601243 |
| Spryd3 223918        | 1.242861034 | 0.071339165 | 1.283270161  | 0.014371509 |
| Hmgcr 15357          | 1.242631847 | 0.173487284 | 1.474083607  | 0.044176204 |
| Ccdc69 52570         | 1.242537098 | 0.390935557 | 1.282144901  | 0.403677687 |
| Wdr8 59002           | 1.242064718 | 0.093662581 | 1.147602125  | 0.180131365 |
| S100g 12309          | 1.241893769 | 0.430664868 | 1            | #DIV/0!     |
| Tfb1m 224481         | 1.241553543 | 0.206741765 | 1.407356185  | 0.071388916 |
| Fbxo38 107035        | 1.241519306 | 0.147019088 | 1.515290966  | 0.014623796 |
| Pddc1 213350         | 1.241465508 | 0.120873858 | 1.023202097  | 0.431346556 |
| Zfp120 104348        | 1.241273462 | 0.085182587 | 1.475761286  | 0.002898373 |
| Dock10 210293        | 1.241240871 | 0.372441017 | 1.241240871  | 0.372441017 |
| Prpf38a 230596       | 1.24092439  | 0.113106845 | 1.377671402  | 0.041871153 |
| Sphk1 20698          | 1.240897654 | 0.305868421 | 1.299550627  | 0.265924373 |
| Gna13 14674          | 1.240881237 | 0.147814094 | 1.405592619  | 0.056240282 |
| Prkab2 108097        | 1.240865927 | 0.291336101 | 1.952643798  | 0.023205611 |
| Ptpro 19277          | 1.240839005 | 0.40189544  | -2.344287879 | 0.152822898 |
| Rnf125 67664         | 1.240832974 | 0.337806013 | 1.240832974  | 0.337806013 |
| F2r 14062            | 1.240579697 | 0.201173573 | 1.240579697  | 0.201173573 |

|                      |             |             |              |             |
|----------------------|-------------|-------------|--------------|-------------|
| Serinc3 26943        | 1.240514247 | 0.115683263 | 1.506231624  | 0.003051223 |
| Atad2 70472          | 1.240430697 | 0.319958488 | 1.383574291  | 0.223908429 |
| Hemk1 69536          | 1.240328209 | 0.117787139 | 1.208223178  | 0.080568946 |
| Atp2b1 67972         | 1.240148169 | 0.149601916 | 1.548601222  | 0.013256181 |
| Serf1 20365          | 1.240074976 | 0.26515782  | 1.288796475  | 0.125091498 |
| Kti12 100087         | 1.239997736 | 0.154886344 | -1.020553863 | 0.442523895 |
| Lrrfip2 71268        | 1.239934113 | 0.077620323 | 1.239934113  | 0.077620323 |
| Cebpb 12608          | 1.239930067 | 0.133921517 | -1.001290618 | 0.495814938 |
| Hpx 15458            | 1.239850576 | 0.2491069   | -1.1796517   | 0.162538551 |
| Fam173b 68073        | 1.239533665 | 0.097496476 | 1.239533665  | 0.097496476 |
| Rp2h 19889           | 1.239376818 | 0.276903859 | 1.922631262  | 0.021868703 |
| Ttc21b 73668         | 1.239043673 | 0.30518822  | 1.880884332  | 0.057149499 |
| Abt1 30946           | 1.239022222 | 0.045749774 | 1.077474791  | 0.161505301 |
| Mlkl 74568           | 1.238628015 | 0.234934434 | -1.006828369 | 0.488202072 |
| Katna1 23924         | 1.238485674 | 0.094074124 | 1.116575241  | 0.195085296 |
| Fnbp1 14269          | 1.238256252 | 0.158885368 | 1.089101893  | 0.323905019 |
| Adcy2 210044         | 1.238235878 | 0.411260687 | 1            | #DIV/0!     |
| Grin2d 14814         | 1.238235878 | 0.411260687 | 1            | #DIV/0!     |
| Ttc16 338348         | 1.238235878 | 0.411260687 | 1            | #DIV/0!     |
| Lin9 72568           | 1.238235878 | 0.411260687 | 1            | #DIV/0!     |
| A3galt2 215493       | 1.238235878 | 0.411260687 | 1            | #DIV/0!     |
| Miox 56727           | 1.238235878 | 0.411260687 | 1            | #DIV/0!     |
| Gm11545 217122       | 1.238235878 | 0.411260687 | 1            | #DIV/0!     |
| Nqo1 18104           | 1.238166404 | 0.15630925  | 1.387140999  | 0.03288644  |
| Tmem161a 234371      | 1.238011246 | 0.127613508 | 1.380760632  | 0.016080294 |
| Gm962 381201         | 1.23791331  | 0.085568877 | 1.23791331   | 0.085568877 |
| Thap3 69876          | 1.237861217 | 0.17271786  | 1.064346857  | 0.367063539 |
| Rgag4 331474         | 1.237635384 | 0.386738804 | -1.409431999 | 0.337288407 |
| Rpusd1 106707        | 1.237456401 | 0.252169026 | 1.237456401  | 0.252169026 |
| Fscn1 14086          | 1.237411461 | 0.330687796 | -1.480136198 | 0.005923895 |
| Lilrb4 14728         | 1.23725439  | 0.343179331 | -1.251620294 | 0.315335931 |
| B630005N14Rik 101148 | 1.237254375 | 0.14394426  | 1.237254375  | 0.14394426  |
| Lsr 54135            | 1.236827424 | 0.009498502 | 1.236827424  | 0.009498502 |
| Rps19 20085          | 1.236774843 | 0.256785912 | 1.134042877  | 0.268571781 |
| Lemd2 224640         | 1.236741979 | 0.045071236 | 1.135490069  | 0.084622376 |
| Irak3 73914          | 1.236514044 | 0.316082925 | 1.547447019  | 0.193296358 |
| Fau 14109            | 1.23622059  | 0.263686985 | 1.090094471  | 0.335596859 |
| 1110003E01Rik 68552  | 1.235532542 | 0.031726946 | 1.300515378  | 0.008165501 |
| Mamstr 74490         | 1.23528202  | 0.398935525 | 1.099838978  | 0.465920044 |
| Capn11 268958        | 1.235231971 | 0.422929276 | 2.052716667  | 0.237969445 |
| 1700019E19Rik 76411  | 1.235196609 | 0.241388355 | 1.500814969  | 0.100169928 |
| X99384 27355         | 1.234877593 | 0.156852273 | 1.061072597  | 0.348257354 |
| Lage3 66192          | 1.234828092 | 0.115849451 | 1.163748035  | 0.203349517 |
| Mff 75734            | 1.234742285 | 0.044849578 | 1.344011381  | 0.007319448 |
| Dpp7 83768           | 1.234646134 | 0.109152768 | 1.11696512   | 0.22566249  |
| Impa2 114663         | 1.234456827 | 0.171682944 | 1.202079658  | 0.180871164 |
| Mocs3 69372          | 1.234425711 | 0.116863874 | 1.043457074  | 0.366377313 |
| Msx1 17701           | 1.234312236 | 0.39403971  | 1.264185714  | 0.40907038  |
| Mirg 100040724       | 1.234312236 | 0.39403971  | 1.264185714  | 0.40907038  |
| 4632415K11Rik 74347  | 1.234034772 | 0.155703554 | 1.404054934  | 0.013626303 |
| Rabgef1 56715        | 1.23395276  | 0.040016718 | 1.087301534  | 0.142319067 |
| Gnl3 30877           | 1.233677788 | 0.109632465 | 1.152167687  | 0.195638328 |
| Fam98c 73833         | 1.233620521 | 0.182129733 | 1.101064747  | 0.322030222 |

|                     |             |             |              |             |
|---------------------|-------------|-------------|--------------|-------------|
| 2010321M09Rik 69882 | 1.233580196 | 0.175454851 | 1.393972045  | 0.037326022 |
| Rbm28 68272         | 1.23354566  | 0.12778455  | 1.260173755  | 0.059256766 |
| Prex1 277360        | 1.233525712 | 0.225452897 | -1.125805269 | 0.244250795 |
| Fanc1 67030         | 1.233418743 | 0.205421442 | -1.095917294 | 0.254884599 |
| Ibtk 108837         | 1.23291294  | 0.076178754 | 1.066913833  | 0.280652191 |
| Igfbp3 16009        | 1.232788994 | 0.153639318 | 1.2261499    | 0.123248394 |
| Gadd45g 23882       | 1.232584383 | 0.297312029 | 1.295629251  | 0.179000707 |
| Dio3os 353504       | 1.232245712 | 0.282123983 | -1.1974058   | 0.26524066  |
| Nudt3 56409         | 1.232111955 | 0.055152869 | 1.067050675  | 0.189016213 |
| Echdc1 52665        | 1.232060043 | 0.317267575 | 1.232060043  | 0.317267575 |
| Gdf10 14560         | 1.231997689 | 0.204259157 | 1.570547274  | 0.005860611 |
| Ptpn21 24000        | 1.231984987 | 0.099496666 | 1.145529594  | 0.19350821  |
| 2410042D21Rik 72425 | 1.231693457 | 0.198628886 | 1.241548415  | 0.124116808 |
| Mcm8 66634          | 1.231647033 | 0.366652203 | 1.231647033  | 0.366652203 |
| Prcp 72461          | 1.23144564  | 0.178267047 | -1.055332712 | 0.34992086  |
| Mat2b 108645        | 1.231247046 | 0.145534672 | 1.529975925  | 0.009679331 |
| Traf4 22032         | 1.231153573 | 0.104846584 | 1.231153573  | 0.104846584 |
| Pip5k1a 18720       | 1.230932779 | 0.153828425 | 1.350459262  | 0.054751798 |
| Alyref2 56009       | 1.230795405 | 0.176772112 | 1.230795405  | 0.176772112 |
| Dtx4 207521         | 1.230774135 | 0.040519546 | 1.331288545  | 0.00054998  |
| Usp31 76179         | 1.230761948 | 0.218120052 | 1.446948387  | 0.094643831 |
| Rnf2 19821          | 1.230739885 | 0.265308785 | -1.180872703 | 0.24063583  |
| Ncdn 26562          | 1.230656012 | 0.036712869 | 1.162558006  | 0.075841324 |
| Osbpl1 106326       | 1.230328219 | 0.103929419 | 1.333236496  | 0.027399194 |
| Hsd17b10 15108      | 1.230283309 | 0.104767804 | 1.230283309  | 0.104767804 |
| Morc3 338467        | 1.230148994 | 0.287379469 | 1.869255342  | 0.015116773 |
| Zfp551 619331       | 1.230118415 | 0.395639307 | 1.255130842  | 0.411829119 |
| Tmem138 72982       | 1.230014725 | 0.258912482 | 1.230014725  | 0.258912482 |
| Sesn1 140742        | 1.229918514 | 0.224305831 | 1.362934823  | 0.154458023 |
| Frrs1 20321         | 1.229653605 | 0.172402559 | 1.055095008  | 0.364180435 |
| Mmrn1 70945         | 1.229530649 | 0.411656108 | -1.314264015 | 0.384854801 |
| Prim1 19075         | 1.229344402 | 0.370227346 | 2.267741467  | 0.119830742 |
| Ldlrap1 100017      | 1.229231479 | 0.010978828 | 1.229231479  | 0.010978828 |
| Csrp2 13008         | 1.229192797 | 0.148344278 | 1.068437748  | 0.325430518 |
| Brca2 12190         | 1.229153608 | 0.259760891 | 1.530077395  | 0.102087806 |
| Srsf10 14105        | 1.229151345 | 0.210813326 | 1.37424992   | 0.130333991 |
| Imm1p1 66541        | 1.228939161 | 0.231684056 | 1.038634072  | 0.441853674 |
| Lrig3 320398        | 1.228896773 | 0.250492493 | 1.876614129  | 0.000506883 |
| Cacnb4 12298        | 1.228816837 | 0.311523089 | -1.048703811 | 0.454518603 |
| Gpatch4 66614       | 1.228700552 | 0.063402456 | 1.288688701  | 0.031833136 |
| Emg1 14791          | 1.228594983 | 0.046968706 | 1.305733111  | 0.009288872 |
| Htra4 330723        | 1.228592204 | 0.334285843 | 1.403419362  | 0.270636016 |
| Cyp3a16 13114       | 1.22841091  | 0.298705225 | 1.404923822  | 0.133637385 |
| Rsl1d1 66409        | 1.228304574 | 0.040559833 | 1.095246192  | 0.152734283 |
| Wipf2 68524         | 1.228276885 | 0.072742842 | 1.223533725  | 0.0160278   |
| Por 18984           | 1.228261819 | 0.034157372 | 1.322688349  | 0.000431858 |
| Abtb2 99382         | 1.22807992  | 0.23011168  | 1.002386288  | 0.495660621 |
| Urb2 382038         | 1.227773732 | 0.056479599 | 1.321131159  | 0.018541856 |
| Timm10 30059        | 1.227735464 | 0.122475485 | 1.227735464  | 0.122475485 |
| Tanc1 66860         | 1.227482228 | 0.239349087 | 1.078586848  | 0.388272661 |
| Hnrpd1 50926        | 1.2274221   | 0.118558213 | 1.201486912  | 0.079503794 |
| Fkbp11 66120        | 1.227420443 | 0.26349274  | 1.517009631  | 0.111992211 |
| 9430023L20Rik 68118 | 1.227328564 | 0.073237389 | 1.227328564  | 0.073237389 |

|                     |             |             |              |             |
|---------------------|-------------|-------------|--------------|-------------|
| Senp3 80886         | 1.227280733 | 0.061242565 | 1.28982787   | 0.003994328 |
| Phf15 76901         | 1.227262079 | 0.123855474 | 1.491304909  | 0.004981094 |
| Mfsd9 211798        | 1.227244101 | 0.372801358 | -1.235101385 | 0.378186279 |
| Igdcc4 56741        | 1.227196255 | 0.4106547   | 5.0331       | 0.093589634 |
| Arhgap31 12549      | 1.227002882 | 0.283387019 | 1.774962896  | 0.03080661  |
| Ggct 110175         | 1.226932924 | 0.163370616 | -1.034775426 | 0.380435168 |
| Slc35b3 108652      | 1.226803175 | 0.199086139 | 1.309589049  | 0.139673427 |
| Tm2d3 68634         | 1.226802954 | 0.121552753 | 1.086676084  | 0.260570414 |
| Tmem62 96957        | 1.226651695 | 0.137561976 | 1.320108364  | 0.087898623 |
| Erh 13877           | 1.226207892 | 0.096462532 | 1.226207892  | 0.096462532 |
| Zdhhc20 75965       | 1.226099523 | 0.238978831 | 1.649856489  | 0.029066617 |
| Gm166 233899        | 1.225829035 | 0.255207474 | 1.767507984  | 0.013097747 |
| Ap3s1 11777         | 1.225654866 | 0.104802974 | 1.361081863  | 0.029193174 |
| Cldn14 56173        | 1.225454923 | 0.082077549 | 1.104361271  | 0.166963426 |
| Siah1a 20437        | 1.225334079 | 0.192894886 | 1.049738552  | 0.390733749 |
| Ppcs 106564         | 1.225275301 | 0.038496468 | 1.225275301  | 0.038496468 |
| Heatr5b 320473      | 1.225273836 | 0.201989106 | 1.101711718  | 0.335409391 |
| Rad54l2 81000       | 1.225221525 | 0.125446882 | 1.469017182  | 0.008375983 |
| Cd6 12511           | 1.225166728 | 0.310573615 | 1.034981666  | 0.463856679 |
| Pik3ca 18706        | 1.224965937 | 0.014079392 | 1.229282631  | 0.000763032 |
| Zfp217 228913       | 1.22493675  | 0.233281067 | 1.066747265  | 0.407858138 |
| Chst1 76969         | 1.224832554 | 0.360278229 | 1.224832554  | 0.360278229 |
| Aebp2 11569         | 1.224721093 | 0.117798886 | 1.125605875  | 0.231083232 |
| Agpat4 68262        | 1.224713133 | 0.179780382 | -1.054399735 | 0.351223124 |
| Slc1a4 55963        | 1.224584895 | 0.323848084 | 1.023382853  | 0.477402703 |
| Rps23 66475         | 1.224432493 | 0.147697546 | 1.067776661  | 0.323625221 |
| Ubr1 22222          | 1.224307344 | 0.20060009  | 1.488657482  | 0.039932439 |
| C430048L16Rik 77604 | 1.224209164 | 0.342197393 | 1.024722699  | 0.479238561 |
| Acacb 100705        | 1.22414651  | 0.116085172 | 1.24586343   | 0.035107462 |
| Pppde1 78825        | 1.224133947 | 0.152863512 | 1.180556878  | 0.175244834 |
| Zbtb42 382639       | 1.224133296 | 0.197507692 | 1.21468438   | 0.176657077 |
| Ctnnd2 18163        | 1.224065209 | 0.39822924  | 1.264185714  | 0.40907038  |
| Tspyl3 241732       | 1.224065209 | 0.39822924  | 1.264185714  | 0.40907038  |
| Tmem70 70397        | 1.223906618 | 0.031548628 | 1.153898197  | 0.064370614 |
| BC057022 433940     | 1.223840315 | 0.261059887 | 1.790179213  | 0.017708926 |
| Mrps35 232536       | 1.223797644 | 0.080579886 | 1.141490415  | 0.162385187 |
| Kctd13 233877       | 1.223474737 | 0.242190196 | 1.191118521  | 0.222580784 |
| 2310033P09Rik 67862 | 1.223456692 | 0.059523554 | 1.187933467  | 0.033806245 |
| Fry 320365          | 1.223301199 | 0.287697336 | 1.570111689  | 0.117818801 |
| Ankrd39 109346      | 1.222995156 | 0.146702101 | 1.222995156  | 0.146702101 |
| Stap2 106766        | 1.222989385 | 0.109756283 | 1.467842619  | 0.003036261 |
| Imp3 102462         | 1.222889581 | 0.176474659 | 1.054925205  | 0.378217226 |
| Zbtb39 320080       | 1.222867378 | 0.138266347 | 1.163844634  | 0.11031339  |
| Foxo3 56484         | 1.222750572 | 0.212624438 | 1.367486049  | 0.087305968 |
| Zfp119a 104349      | 1.222594795 | 0.323834553 | 2.110464409  | 0.025267897 |
| Riok1 71340         | 1.222371614 | 0.252252544 | 1.222371614  | 0.252252544 |
| Slc4a1ap 20534      | 1.222281205 | 0.075816306 | 1.222281205  | 0.075816306 |
| Atp6ap1 54411       | 1.222275752 | 0.030489512 | 1.14058563   | 0.044001078 |
| Tor1b 30934         | 1.222185996 | 0.036363437 | 1.222185996  | 0.036363437 |
| Senp6 215351        | 1.222162235 | 0.062010593 | 1.222162235  | 0.062010593 |
| Tmem82 213989       | 1.222087297 | 0.109740843 | 1.192628325  | 0.059658886 |
| Zfat 380993         | 1.221917967 | 0.246739421 | 1.157219087  | 0.212369489 |
| H2-K2 630499        | 1.221884726 | 0.196531475 | 1.028852622  | 0.435680161 |

|                      |             |             |              |             |
|----------------------|-------------|-------------|--------------|-------------|
| Mir703 735265        | 1.221620793 | 0.249937625 | 1.492063102  | 0.096949868 |
| Msh6 17688           | 1.221583838 | 0.253548661 | 1.247362255  | 0.180324279 |
| Fam60a 56306         | 1.221380988 | 0.355974744 | -1.082536534 | 0.446768122 |
| Tmem101 76547        | 1.221369904 | 0.041545061 | 1.143871078  | 0.084479339 |
| Lancl2 71835         | 1.221331155 | 0.307658866 | 1.707075356  | 0.077162098 |
| Tbc1d10b 68449       | 1.221279323 | 0.038453969 | 1.320303044  | 0.001663199 |
| Mill2 243864         | 1.221277501 | 0.366813906 | 1.221277501  | 0.366813906 |
| Snrpc 20630          | 1.221276309 | 0.01904377  | 1.268208573  | 0.007049078 |
| Ints7 77065          | 1.221195115 | 0.261510741 | 1.049150826  | 0.440056545 |
| Wdr34 71820          | 1.221022234 | 0.126529733 | 1.466843883  | 0.010393333 |
| Ccdc9 243846         | 1.221013924 | 0.126993174 | 1.190588787  | 0.05720766  |
| Cyp4a32 100040843    | 1.220900976 | 0.2512344   | 1.220900976  | 0.2512344   |
| Eif4a1 13681         | 1.220752202 | 0.064357375 | 1.220752202  | 0.064357375 |
| Hr 15460             | 1.220349321 | 0.272361237 | 1.220349321  | 0.272361237 |
| Pir 69656            | 1.220175317 | 0.108180863 | 1.178828208  | 0.10953782  |
| Zfp54 22712          | 1.220169015 | 0.354070268 | 1.031087153  | 0.476163505 |
| Mir101a 387143       | 1.220147699 | 0.414699976 | -1.700679995 | 0.182430754 |
| Nup54 269113         | 1.220121696 | 0.225843689 | 1.220121696  | 0.225843689 |
| Nudt18 213484        | 1.219936945 | 0.127823872 | 1.244199496  | 0.077210581 |
| C80913 19777         | 1.219808045 | 0.002170678 | 1.29638768   | 0.000106286 |
| Capn10 23830         | 1.219800468 | 0.02562144  | 1.219800468  | 0.02562144  |
| Ms4a4b 60361         | 1.219703061 | 0.349045854 | 1.21984852   | 0.298035344 |
| Fam189a1 70638       | 1.219459773 | 0.421562816 | -4.016833333 | 0.093227909 |
| Rbm4b 66704          | 1.219412875 | 0.138251397 | 1.19359346   | 0.123297909 |
| Rps26 27370          | 1.219392274 | 0.155705464 | 1.067288404  | 0.335450497 |
| Nfatc4 73181         | 1.219256692 | 0.24680322  | 1.568297552  | 0.011185266 |
| Gm12657 667250       | 1.219188565 | 0.061418196 | 1.395952792  | 0.000776904 |
| Zfp593 68040         | 1.219082432 | 0.280870789 | 1.219082432  | 0.280870789 |
| Wnt4 22417           | 1.218916258 | 0.358995321 | 1.855601949  | 0.158101376 |
| Ncapd2 68298         | 1.218806405 | 0.143699993 | 1.227483564  | 0.069520466 |
| Tonsl 72749          | 1.218657482 | 0.365930983 | 1.24776777   | 0.281526487 |
| Prmt5 27374          | 1.21852229  | 0.068524919 | 1.275514756  | 0.036284937 |
| Ntrk1 18211          | 1.21841936  | 0.261540215 | 1.082269984  | 0.405036955 |
| Meaf6 70088          | 1.218306603 | 0.202157695 | 1.572921704  | 0.00779145  |
| Fut1 14343           | 1.218278833 | 0.345837949 | -1.364963679 | 0.153711317 |
| Rorc 19885           | 1.21824097  | 0.093511638 | 1.248377877  | 0.035596696 |
| Ppan 235036          | 1.218227696 | 0.140737955 | 1.058988616  | 0.314536405 |
| B430306N03Rik 320148 | 1.218116075 | 0.24322812  | 1.071271905  | 0.395656174 |
| Slc6a8 102857        | 1.218012172 | 0.187324111 | 1.069728542  | 0.368315554 |
| Hspa4l 18415         | 1.217952961 | 0.194474804 | 1.087096733  | 0.342011386 |
| Ppp2r4 110854        | 1.217413959 | 0.065254886 | 1.217413959  | 0.065254886 |
| Tmem151a 381199      | 1.217226937 | 0.374931673 | 1.900066507  | 0.186724779 |
| Rpl36al 66483        | 1.217056067 | 0.185554802 | 1.059621383  | 0.379232034 |
| Tmem86a 67893        | 1.217014308 | 0.111501285 | 1.36652892   | 0.02202378  |
| Mrpl32 75398         | 1.21696544  | 0.072299303 | 1.194028758  | 0.030560736 |
| Rplp1 56040          | 1.216828996 | 0.276880575 | -1.229673216 | 0.109549678 |
| Emp2 13731           | 1.216706356 | 0.171466925 | 1.26720676   | 0.062264322 |
| Ehmt1 77683          | 1.216589868 | 0.139645261 | 1.250246185  | 0.054454764 |
| Pole4 66979          | 1.21657568  | 0.127247055 | 1.21657568   | 0.127247055 |
| 3230401D17Rik 66680  | 1.216372144 | 0.066495337 | 1.330667802  | 0.011858921 |
| Sgtb 218544          | 1.216123063 | 0.395496619 | -1.469007782 | 0.317043871 |
| Exoc2 66482          | 1.21590654  | 0.241764514 | 1.36295706   | 0.158471198 |
| Cd52 23833           | 1.215733924 | 0.270609002 | -1.075728431 | 0.369702517 |

|                      |             |             |              |             |
|----------------------|-------------|-------------|--------------|-------------|
| Maz 17188            | 1.215705273 | 0.182903889 | 1.042820045  | 0.399842434 |
| ltga2b 16399         | 1.215639669 | 0.248078628 | -1.039986342 | 0.4209101   |
| Dcaf6 74106          | 1.21556059  | 0.070929697 | 1.151840613  | 0.024765814 |
| Ldhb 16832           | 1.215443089 | 0.21593327  | 1.375322291  | 0.117722364 |
| Socs5 56468          | 1.215292573 | 0.332760111 | -1.2439695   | 0.251072561 |
| Ercc3 13872          | 1.215270107 | 0.168675721 | 1.060216175  | 0.35972882  |
| Hexb 15212           | 1.215207907 | 0.167086144 | 1.080830955  | 0.333214699 |
| Hmg1l1 434174        | 1.215174919 | 0.054310279 | 1.231350838  | 0.014696177 |
| LnX2 140887          | 1.215132185 | 0.055219732 | 1.134177864  | 0.112842627 |
| Ccdc15 245902        | 1.215093219 | 0.369918663 | 1.215093219  | 0.369918663 |
| Rmi1 74386           | 1.214931473 | 0.165982937 | 1.29686741   | 0.053963965 |
| Arl6ip5 65106        | 1.214587594 | 0.029928944 | 1.325090821  | 0.001678539 |
| 2010305A19Rik 69893  | 1.214502923 | 0.183716138 | 1.214502923  | 0.183716138 |
| 4930503L19Rik 269033 | 1.214285714 | 0.437695173 | 1            | #DIV/0!     |
| Hsp90b1 22027        | 1.214086846 | 0.098471021 | 1.464001479  | 0.000316062 |
| Sowaha 237761        | 1.213982889 | 0.359535795 | 1.213982889  | 0.359535795 |
| Dcaf13 223499        | 1.213794402 | 0.114156815 | 1.132919578  | 0.067905449 |
| Hsf2bp 74377         | 1.213489281 | 0.397604444 | 1.213489281  | 0.397604444 |
| Akt3 23797           | 1.213391538 | 0.300645306 | 1.213391538  | 0.300645306 |
| Wdr5 140858          | 1.212847801 | 0.022809698 | 1.110171267  | 0.062008719 |
| Egr1 13653           | 1.21275754  | 0.275946386 | -1.004869606 | 0.493665107 |
| G2e3 217558          | 1.212692587 | 0.397277013 | 2.038087685  | 0.217686927 |
| Cbx6 494448          | 1.212522313 | 0.172613505 | 1.077185499  | 0.342367122 |
| C9 12279             | 1.212504951 | 0.03619967  | 1.147549997  | 0.072300248 |
| Pak1ip1 68083        | 1.212227738 | 0.08149234  | 1.151419817  | 0.149183094 |
| Rab13 67657          | 1.212131053 | 0.096962528 | 1.120618349  | 0.191337618 |
| Klf11 194655         | 1.212088388 | 0.153568311 | 1.212088388  | 0.153568311 |
| Nek8 140859          | 1.211889992 | 0.216754559 | 1.169471473  | 0.225124294 |
| Spp1 74585           | 1.211769415 | 0.115968694 | -1.00738884  | 0.454195937 |
| Sumo3 20610          | 1.211736644 | 0.015288003 | 1.197621346  | 0.006711117 |
| Rpl36a 19982         | 1.211704749 | 0.240450782 | 1.219310287  | 0.095552329 |
| 2700023E23Rik 70036  | 1.211589354 | 0.308915153 | -1.063058053 | 0.432999923 |
| Smpd2 20598          | 1.211538652 | 0.08081441  | 1.158107135  | 0.148806185 |
| Gdap2 14547          | 1.211156132 | 0.188751787 | 1.393722689  | 0.066530657 |
| 1700066M21Rik 73467  | 1.211134013 | 0.207403777 | 1.195210317  | 0.18155282  |
| Actb 11461           | 1.211098723 | 0.106557078 | 1.107242748  | 0.219962028 |
| Zfp943 74670         | 1.210626726 | 0.263377687 | 1.445183986  | 0.049821949 |
| Ctstn3 232370        | 1.210535039 | 0.242936261 | 1.436942731  | 0.103257913 |
| Atp6v1d 73834        | 1.210461459 | 0.074349751 | 1.191172625  | 0.049277362 |
| D19ErtD737e 76539    | 1.210459177 | 0.218895745 | -1.11396221  | 0.177677732 |
| Ndufa5 68202         | 1.210282872 | 0.168860665 | -1.01035378  | 0.47385928  |
| Gmppb 331026         | 1.210272872 | 0.177578345 | 1.402972765  | 0.046901843 |
| Rb1cc1 12421         | 1.210137145 | 0.211775057 | 1.564820883  | 0.002878966 |
| UbtD2 327900         | 1.210045778 | 0.31641289  | 1.01372833   | 0.484857886 |
| Rps19-ps3 277692     | 1.210038729 | 0.234005319 | 1.014405771  | 0.474497752 |
| Alkbh1 211064        | 1.209988703 | 0.079754261 | 1.209988703  | 0.079754261 |
| Lig3 16882           | 1.209914002 | 0.129580326 | 1.021956149  | 0.434574179 |
| Rassf3 192678        | 1.209807779 | 0.093872877 | 1.365258927  | 0.00660231  |
| Dennd4a 102442       | 1.209717713 | 0.13174231  | 1.122536606  | 0.245041714 |
| AI846148 68229       | 1.209648089 | 0.149117285 | -1.024334607 | 0.410635991 |
| Sema3f 20350         | 1.209645114 | 0.163991615 | 1.240613111  | 0.105563532 |
| Tbc1d24 224617       | 1.209437161 | 0.156063882 | 1.088904102  | 0.298137    |
| Rars 104458          | 1.209184825 | 0.039237853 | 1.209184825  | 0.039237853 |



|                 |             |             |              |             |
|-----------------|-------------|-------------|--------------|-------------|
| Cox16 66272     | 1.209166105 | 0.047364503 | 1.252384296  | 0.03578061  |
| Rpl23 65019     | 1.209091197 | 0.059260191 | 1.055711755  | 0.226243436 |
| Mbnl1 56758     | 1.209062742 | 0.099255625 | 1.035208184  | 0.364253165 |
| C87436 232196   | 1.208974936 | 0.156257044 | 1.208974936  | 0.156257044 |
| Acnat2 209186   | 1.208937175 | 0.086021286 | 1.397314341  | 9.35491E-05 |
| Ndufb2 68198    | 1.208810097 | 0.149805897 | 1.211262476  | 0.044233311 |
| Rraga 68441     | 1.208644956 | 0.035796778 | 1.14168336   | 0.06957952  |
| Tusc1 69136     | 1.208428786 | 0.245313656 | -1.133315258 | 0.227358228 |
| Pwp1 103136     | 1.208145092 | 0.219649947 | 1.07720324   | 0.380544671 |
| Hexa 15211      | 1.208100452 | 0.11185486  | 1.185954062  | 0.081844244 |
| Gtf2e2 68153    | 1.207970654 | 0.185971054 | 1.207970654  | 0.185971054 |
| Cadm4 260299    | 1.207888403 | 0.212697154 | 1.394415538  | 0.088912466 |
| Vmp1 75909      | 1.207763089 | 0.029477123 | 1.3205935    | 0.001252066 |
| Cdk9 107951     | 1.20758929  | 0.105575617 | 1.133327007  | 0.192751379 |
| Rpp30 54364     | 1.207534354 | 0.303639046 | -1.082050796 | 0.402450513 |
| Dnajc8 68598    | 1.207514541 | 0.07216957  | 1.207514541  | 0.07216957  |
| Pnpt1 71701     | 1.207484695 | 0.292254089 | 1.398476606  | 0.140044676 |
| Ptp4a1 19243    | 1.207367791 | 0.101840315 | 1.302262904  | 0.023847873 |
| Cyca 13063      | 1.207327662 | 0.114747765 | 1.206814847  | 0.072314688 |
| Dnajc12 30045   | 1.207291211 | 0.156098215 | 1.230425194  | 0.064494886 |
| Gdf2 12165      | 1.207163569 | 0.04518972  | 1.207163569  | 0.04518972  |
| Atxn7l3b 382423 | 1.207025322 | 0.077835857 | 1.128042181  | 0.158393048 |
| Fam109a 231717  | 1.207004785 | 0.077862596 | 1.207004785  | 0.077862596 |
| Myeov2 66915    | 1.206953168 | 0.115424321 | 1.002294145  | 0.489072967 |
| Tpst1 22021     | 1.206689836 | 0.101275124 | 1.206689836  | 0.101275124 |
| Plin2 11520     | 1.206651132 | 0.172792209 | 1.132656653  | 0.18179932  |
| Epc1 13831      | 1.20651264  | 0.088155595 | 1.20651264   | 0.088155595 |
| Tbp 21374       | 1.206417075 | 0.218260609 | -1.076961018 | 0.336859917 |
| Cep76 225659    | 1.206406781 | 0.274539269 | 1.206406781  | 0.274539269 |
| Ifi27l2b 217845 | 1.20616648  | 0.139626225 | 1.20616648   | 0.139626225 |
| Cbx3 12417      | 1.206160673 | 0.050672719 | 1.121358515  | 0.092773642 |
| Pnpla2 66853    | 1.206087986 | 0.101992776 | 1.205974754  | 0.091655745 |
| Al118078 244886 | 1.206071834 | 0.353373551 | -1.089387769 | 0.368162488 |
| Pigt 78928      | 1.205916485 | 0.116739046 | 1.205916485  | 0.116739046 |
| Traf2 22030     | 1.205586525 | 0.184146245 | 1.034644572  | 0.411206201 |
| Isg20l2 229504  | 1.205207844 | 0.034135785 | 1.145766983  | 0.068900383 |
| Bcl7c 12055     | 1.205169597 | 0.253631486 | 1.150555105  | 0.273172947 |
| Galnt4 233733   | 1.205168906 | 0.323025022 | 1.151423698  | 0.364555122 |
| Fas 14102       | 1.205125328 | 0.205513249 | 1.234212381  | 0.08633485  |
| Lpar2 53978     | 1.205027253 | 0.366790988 | 1.011787147  | 0.488717394 |
| Rsad2 58185     | 1.205026846 | 0.248825624 | 1.205026846  | 0.248825624 |
| Srsf9 108014    | 1.204818704 | 0.057623965 | 1.187078428  | 0.089412725 |
| Cgrrf1 68755    | 1.204805718 | 0.152863271 | 1.351528304  | 0.050917617 |
| Caln1 140904    | 1.204745767 | 0.251989632 | 1.025029239  | 0.462587125 |
| Rbmx 19655      | 1.204586129 | 0.127051165 | 1.450082392  | 0.004087244 |
| Adcyap1r1 11517 | 1.204478181 | 0.304277174 | -1.108642241 | 0.360777983 |
| Nhlrc2 66866    | 1.204390851 | 0.211618134 | 1.236610819  | 0.110804248 |
| Sub1 20024      | 1.20406521  | 0.02677179  | 1.249211082  | 0.016206716 |
| Atp6v0b 114143  | 1.204058263 | 0.071588268 | 1.045315192  | 0.272809987 |
| Map3k1 26401    | 1.203879029 | 0.304802463 | 1.203879029  | 0.304802463 |
| Ssb 20823       | 1.203859607 | 0.119317592 | 1.325265531  | 0.011852544 |
| Tbca 21371      | 1.203772103 | 0.083877787 | 1.157259408  | 0.051166201 |
| Il1r1 16177     | 1.203532267 | 0.285526137 | 1.625351555  | 0.051660231 |

|                      |             |             |              |             |
|----------------------|-------------|-------------|--------------|-------------|
| Abca9 217262         | 1.203451049 | 0.400383065 | -1.465157012 | 0.318275402 |
| Zfp212 232784        | 1.203326186 | 0.196477661 | -1.05320905  | 0.369376489 |
| Pcyox1l 240334       | 1.203275735 | 0.297315693 | 1.464432736  | 0.157229704 |
| Tubb4b 227613        | 1.20326031  | 0.09541606  | 1.249998749  | 0.066739964 |
| Prr3 75210           | 1.203234545 | 0.10521897  | 1.345110587  | 0.015449999 |
| Fam55d 244853        | 1.20297971  | 0.410025603 | 3.907410225  | 0.07895149  |
| A930001N09Rik 77128  | 1.202947258 | 0.188461278 | 1.202947258  | 0.188461278 |
| Fam131c 277743       | 1.202876294 | 0.166839671 | -1.035344677 | 0.370047836 |
| Supt3h 109115        | 1.202543032 | 0.30584607  | 1.404496125  | 0.105889684 |
| Eif3e 16341          | 1.20250339  | 0.048370906 | 1.133764222  | 0.099079925 |
| Zfp46 22704          | 1.202492688 | 0.1904286   | 1.36085529   | 0.031532007 |
| 1110008J03Rik 100764 | 1.20233137  | 0.226250907 | 1.391460715  | 0.038042068 |
| Cdh1 12550           | 1.202302375 | 0.228296479 | 1.658995467  | 0.001533459 |
| Eif1a 13664          | 1.201983138 | 0.175654831 | 1.164982979  | 0.136784416 |
| Prc1 233406          | 1.201879057 | 0.402331357 | 1.201879057  | 0.402331357 |
| Angel2 52477         | 1.201849045 | 0.146808636 | 1.201849045  | 0.146808636 |
| Tnik 665113          | 1.20182586  | 0.402886026 | -1.817607799 | 0.201128651 |
| Bub1 12235           | 1.201808426 | 0.407356298 | 1.195314368  | 0.428478238 |
| Ung 22256            | 1.201738149 | 0.148287427 | 1.125158908  | 0.156053134 |
| BC017612 170748      | 1.201339293 | 0.122974199 | 1.270428935  | 0.066414035 |
| Aprt 11821           | 1.201136963 | 0.143208496 | 1.282159722  | 0.071656455 |
| Rhoc 11853           | 1.200936164 | 0.190966824 | 1.130184508  | 0.129627884 |
| Rab3a 19339          | 1.20056306  | 0.215120297 | 1.008657805  | 0.479843297 |
| Adal 75894           | 1.200429288 | 0.275086499 | 1.200429288  | 0.275086499 |
| Aldh1a7 26358        | 1.200381016 | 0.163188879 | 1.3312342    | 0.033164078 |
| Rhpn2 52428          | 1.200356161 | 0.247065549 | 1.445671173  | 0.086059242 |
| Atp5g3 228033        | 1.200337553 | 0.034935489 | 1.278472176  | 0.006889345 |
| Elk4 13714           | 1.200290297 | 0.093478885 | 1.200290297  | 0.093478885 |
| Rnf217 268291        | 1.200252269 | 0.148770211 | 1.081256698  | 0.293991877 |
| Usp20 74270          | 1.200126733 | 0.127761096 | 1.316907833  | 0.047693291 |
| Taf4b 72504          | 1.199791099 | 0.409022405 | -1.779313652 | 0.246948927 |
| Scoc 56367           | 1.199671215 | 0.311132582 | -1.105928806 | 0.372767289 |
| Igfbp7 29817         | 1.199666768 | 0.074129367 | 1.047259131  | 0.289556773 |
| Lrrc33 224109        | 1.199548933 | 0.162176997 | 1.164611424  | 0.117746234 |
| Ppp4r2 232314        | 1.199233125 | 0.225779995 | 1.482602423  | 0.032323029 |
| Rpl5 100503670       | 1.199203411 | 0.127442416 | 1.097490523  | 0.257025788 |
| Cttnbp2nl 80281      | 1.199033407 | 0.299967895 | 1.36845016   | 0.080890681 |
| 2410131K14Rik 76792  | 1.198909508 | 0.128223941 | 1.43802279   | 0.004509138 |
| Rgs4 19736           | 1.198849966 | 0.381552677 | 2.362070998  | 0.081612439 |
| Nhsl1 215819         | 1.198783402 | 0.302415532 | 1.94151797   | 0.003806704 |
| Urm1 68205           | 1.198773706 | 0.109645812 | 1.29820696   | 0.021464417 |
| Rpp21 67676          | 1.198650606 | 0.218514984 | 1.113503406  | 0.333023893 |
| Fcna 14133           | 1.198638424 | 0.022402952 | 1.198638424  | 0.022402952 |
| Golga3 269682        | 1.198427154 | 0.160789766 | 1.332803251  | 0.063888444 |
| Arf6 11845           | 1.198369464 | 0.051636551 | 1.060885182  | 0.192306322 |
| Clip4 78785          | 1.198262043 | 0.421473229 | 5.0331       | 0.093589634 |
| A330049M08Rik 230822 | 1.198232707 | 0.340513677 | 1.198232707  | 0.340513677 |
| 2010107E04Rik 70257  | 1.198223618 | 0.149023143 | -1.01431139  | 0.439150644 |
| Ndufa2 17991         | 1.19817101  | 0.231428028 | -1.004388913 | 0.490555209 |
| 4933422H20Rik 432613 | 1.198079092 | 0.269258913 | 1.198079092  | 0.269258913 |
| 1500001M20Rik 68971  | 1.1977416   | 0.307225455 | 1.311591353  | 0.252290429 |
| Ciapin1 109006       | 1.19760548  | 0.13365959  | 1.081100189  | 0.280193889 |
| A930012L18Rik 626275 | 1.197581142 | 0.414865642 | -1.144896552 | 0.447167923 |

|                     |             |             |              |             |
|---------------------|-------------|-------------|--------------|-------------|
| Nt5c2 76952         | 1.197349698 | 0.056159662 | 1.2531896    | 0.03260017  |
| Adck5 268822        | 1.19733673  | 0.11420523  | 1.086786755  | 0.236283094 |
| 1700030C10Rik 69513 | 1.197311244 | 0.308937072 | 1.118292142  | 0.366836352 |
| Ube2n 93765         | 1.197019914 | 0.010469022 | 1.258124177  | 0.001185855 |
| Fam167a 219148      | 1.196989281 | 0.385538989 | -1.430229289 | 0.272060568 |
| Cul5 75717          | 1.196627283 | 0.206229415 | 1.042358633  | 0.413598366 |
| Kdm4a 230674        | 1.196596298 | 0.13371573  | 1.269169605  | 0.070488433 |
| Srsf1 110809        | 1.196588212 | 0.154987392 | 1.196588212  | 0.154987392 |
| Spon2 100689        | 1.196521386 | 0.148946396 | 1.279642532  | 0.072478305 |
| A330040F15Rik 74333 | 1.196392551 | 0.409868573 | -2.085282363 | 0.154585183 |
| Ubxn11 67586        | 1.196114513 | 0.408588343 | 1.255130842  | 0.411829119 |
| Gm5177 382450       | 1.196114513 | 0.408588343 | 1.255130842  | 0.411829119 |
| Zbtb26 320633       | 1.196095735 | 0.347713778 | 1.196095735  | 0.347713778 |
| Crtap 56693         | 1.195873106 | 0.251573839 | 1.189897061  | 0.170505164 |
| Rad17 19356         | 1.195392228 | 0.108378805 | 1.308350147  | 0.031745984 |
| Set 56086           | 1.195141948 | 0.078331291 | 1.195141948  | 0.078331291 |
| Brix1 67832         | 1.195073551 | 0.144056221 | 1.094058539  | 0.281278594 |
| Zfp953 629016       | 1.194925475 | 0.350575594 | 1.194925475  | 0.350575594 |
| Zfp595 218314       | 1.194893788 | 0.332864902 | -1.115591365 | 0.388242975 |
| Hhex 15242          | 1.194817449 | 0.345516673 | -1.220966275 | 0.294587217 |
| Rpl36 54217         | 1.194752412 | 0.288390236 | -1.087306462 | 0.359604351 |
| Fam129b 227737      | 1.194735039 | 0.229323065 | 1.104424121  | 0.188072485 |
| Minos1 433771       | 1.194633084 | 0.111575945 | 1.101817472  | 0.226918441 |
| Chchd5 66170        | 1.194595968 | 0.1718355   | 1.039792696  | 0.385371515 |
| Cdnf 227526         | 1.194514176 | 0.312662866 | 1.425582359  | 0.122378952 |
| Elp3 74195          | 1.194377236 | 0.197961332 | 1.024827812  | 0.437539522 |
| Slc25a47 104910     | 1.194277659 | 0.089584539 | 1.160803018  | 0.024781354 |
| Wbp4 22380          | 1.194180863 | 0.080313158 | 1.144030651  | 0.078840225 |
| Ash2l 23808         | 1.194132641 | 0.09449624  | 1.344454211  | 0.003687045 |
| Pcgf6 71041         | 1.194058222 | 0.210689033 | 1.549287471  | 0.009597096 |
| Gng2 14702          | 1.194045772 | 0.325259431 | 1.194045772  | 0.325259431 |
| Bace2 56175         | 1.193853742 | 0.234939392 | 1.131428727  | 0.263119595 |
| Pdzd11 72621        | 1.193700315 | 0.13749935  | 1.2973946    | 0.035853414 |
| Zfp784 654801       | 1.193692723 | 0.240622841 | 1.193692723  | 0.240622841 |
| Plk3 12795          | 1.193660747 | 0.276040595 | 1.496094741  | 0.08595487  |
| Kctd15 233107       | 1.193304817 | 0.11538777  | 1.308938565  | 0.003682011 |
| Acyp2 75572         | 1.192880955 | 0.381909529 | 2.002052472  | 0.143054761 |
| Dnajb6 23950        | 1.192575292 | 0.163315026 | 1.192575292  | 0.163315026 |
| Notch1 18128        | 1.192178841 | 0.204526713 | 1.242874239  | 0.081760346 |
| Slc16a1 20501       | 1.192111378 | 0.138820962 | 1.259494424  | 0.079877551 |
| Med10 28077         | 1.192039334 | 0.06392835  | 1.062842693  | 0.223686304 |
| Casp8ap2 26885      | 1.192027102 | 0.367141822 | 1.192027102  | 0.367141822 |
| 2900010M23Rik 67267 | 1.191991657 | 0.232002327 | -1.113798351 | 0.232539297 |
| Haus7 73738         | 1.191980545 | 0.164021667 | 1.068950604  | 0.333718238 |
| Tcp11l2 216198      | 1.191834663 | 0.297781605 | 1.033976928  | 0.46188077  |
| Agpat9 231510       | 1.19178197  | 0.230371423 | 1.029759924  | 0.445341223 |
| Emp1 13730          | 1.191765312 | 0.411605861 | 1.195314368  | 0.428478238 |
| Sip1 66603          | 1.191731238 | 0.224077839 | 1.051044548  | 0.400977396 |
| Gm7609 665378       | 1.191713865 | 0.382737633 | 2.026293467  | 0.137926329 |
| Txn14a 27366        | 1.191697352 | 0.0080141   | 1.166882657  | 0.018176507 |
| Ube2j2 140499       | 1.191615618 | 0.137213072 | 1.11268629   | 0.2509439   |
| Enpp2 18606         | 1.191603984 | 0.241248511 | 1.533131171  | 0.012353345 |
| Mid2 23947          | 1.191563265 | 0.403080743 | 1.107925644  | 0.449595369 |

|                      |             |             |              |             |
|----------------------|-------------|-------------|--------------|-------------|
| Fastkd5 380601       | 1.191379809 | 0.265824187 | 1.588963846  | 0.027067119 |
| Gfod2 70575          | 1.191378291 | 0.109284037 | 1.11464397   | 0.205381025 |
| Itm2c 64294          | 1.191353175 | 0.017446253 | 1.094831122  | 0.045898006 |
| 4930403N07Rik 73936  | 1.191304111 | 0.385337562 | 1.756516064  | 0.211013396 |
| Arfgef1 211673       | 1.191246853 | 0.198725936 | 1.191246853  | 0.198725936 |
| Rngtt 24018          | 1.190970099 | 0.325769611 | 1.701260412  | 0.073527569 |
| Olfr856-ps1 624341   | 1.190957377 | 0.312019686 | 1.327142176  | 0.241774988 |
| 2010003K11Rik 69861  | 1.190921907 | 0.260831005 | -1.026489848 | 0.452187571 |
| Parvg 64099          | 1.190870883 | 0.275565362 | -1.177224379 | 0.20226527  |
| Nxf1 53319           | 1.190852094 | 0.120688677 | -1.002322033 | 0.486921321 |
| Atpbd4 66632         | 1.190756079 | 0.193990013 | 1.105299143  | 0.307249167 |
| Cebpg 12611          | 1.190678152 | 0.029701919 | 1.297732223  | 3.08148E-05 |
| Fam174b 100038347    | 1.190668143 | 0.083163459 | 1.086895647  | 0.168298902 |
| Traf3ip1 74019       | 1.190384287 | 0.227919107 | -1.108591751 | 0.23405828  |
| Hs2st1 23908         | 1.190338262 | 0.261311854 | 1.190338262  | 0.261311854 |
| Clcn5 12728          | 1.190228635 | 0.411221383 | 1.264185714  | 0.40907038  |
| Shb 230126           | 1.19019032  | 0.120919    | 1.218275735  | 0.0309584   |
| Tcf19 106795         | 1.190063589 | 0.348033089 | 1.09611263   | 0.411842249 |
| Churc1 211151        | 1.189882171 | 0.099222574 | 1.110783753  | 0.198953027 |
| Vegfc 22341          | 1.189860108 | 0.358561392 | -1.475437307 | 0.145118594 |
| Mir17hg 75957        | 1.189796811 | 0.41215364  | 1.170129778  | 0.437059136 |
| Ndufs4 17993         | 1.189776462 | 0.146396476 | 1.073521368  | 0.304173356 |
| Cwc25 67480          | 1.189698517 | 0.229370054 | 1.389479884  | 0.082696418 |
| Brp44 70456          | 1.189676085 | 0.060577665 | 1.098807642  | 0.11599498  |
| Utp20 70683          | 1.189652908 | 0.213528301 | 1.189652908  | 0.213528301 |
| Ube2m 22192          | 1.189601641 | 0.18323741  | -1.058433372 | 0.280374823 |
| Ttc33 67515          | 1.189556759 | 0.145856011 | 1.113405964  | 0.220699428 |
| Asl 109900           | 1.189523377 | 0.158812481 | 1.244418331  | 0.114895709 |
| Rundc3a 51799        | 1.189449842 | 0.153978428 | 1.001123074  | 0.496645045 |
| 2210018M11Rik 233545 | 1.189389724 | 0.071654834 | 1.331812435  | 0.003004808 |
| Uba6 231380          | 1.189388449 | 0.265955447 | -1.054544838 | 0.391969266 |
| Gpr172b 52710        | 1.189279301 | 0.162867122 | 1.292988426  | 0.056524944 |
| Enah 13800           | 1.189265729 | 0.39067696  | 1.813056099  | 0.208718294 |
| A130040M12Rik 319269 | 1.188854525 | 0.349115773 | 1.188854525  | 0.349115773 |
| 8430406I07Rik 74528  | 1.188754374 | 0.212490672 | 1.348059503  | 0.041629778 |
| Hmgxb3 106894        | 1.188743906 | 0.148411303 | 1.032614088  | 0.405850968 |
| Kif5b 16573          | 1.18872823  | 0.202731054 | 1.574661687  | 0.000190327 |
| Hspa13 110920        | 1.188663295 | 0.285098774 | 1.673874909  | 0.017754176 |
| D14Abb1e 218850      | 1.188528235 | 0.151670978 | 1.188528235  | 0.151670978 |
| Vwf 22371            | 1.188478474 | 0.213665755 | 1.188478474  | 0.213665755 |
| Lrig2 269473         | 1.18830243  | 0.152882767 | 1.18830243   | 0.152882767 |
| Ripply3 170765       | 1.188233327 | 0.364215164 | -1.041454457 | 0.465340323 |
| Rbm15 229700         | 1.188130461 | 0.275529005 | 1.178028245  | 0.174616752 |
| Gsr 14782            | 1.188080976 | 0.023626163 | 1.188080976  | 0.023626163 |
| Ndufb4 68194         | 1.18804327  | 0.101475674 | 1.093528307  | 0.211030248 |
| Adamts9 101401       | 1.187941488 | 0.371555221 | 1.187941488  | 0.371555221 |
| Atp6v1c1 66335       | 1.187904533 | 0.060390879 | 1.187904533  | 0.060390879 |
| Zbtb7c 207259        | 1.187903501 | 0.319335388 | -1.122202563 | 0.351384897 |
| Klh132 212390        | 1.187845914 | 0.141598703 | 1.187845914  | 0.141598703 |
| 2310016M24Rik 66379  | 1.187672461 | 0.123255856 | 1.311092427  | 0.031242196 |
| Thoc1 225160         | 1.187594352 | 0.157582788 | 1.099179124  | 0.287000079 |
| Gm5617 434402        | 1.187584006 | 0.143715189 | 1.187584006  | 0.143715189 |
| Rbm15b 109095        | 1.187475436 | 0.276875681 | 1.187475436  | 0.276875681 |

|                      |             |             |              |             |
|----------------------|-------------|-------------|--------------|-------------|
| Naa20 67877          | 1.187445701 | 0.217621184 | 1.502521696  | 0.011016545 |
| Dcp2 70640           | 1.187442211 | 0.264224965 | 1.272143107  | 0.196385977 |
| Seh1 72124           | 1.187413593 | 0.100448887 | 1.179076716  | 0.027097347 |
| 31100821 17Rik 73212 | 1.187287881 | 0.181056859 | 1.15392178   | 0.181137836 |
| Rogdi 66049          | 1.187208226 | 0.192140523 | 1.09060313   | 0.321198079 |
| Ccdc90b 66365        | 1.186945301 | 0.275749849 | 1.033806533  | 0.448706248 |
| H2-Aa 14960          | 1.186833055 | 0.284562124 | -1.100396526 | 0.301317955 |
| Chpf 74241           | 1.186828145 | 0.264244926 | 1.269509455  | 0.010289553 |
| Fhod1 234686         | 1.186756378 | 0.158807499 | 1.079169361  | 0.302466805 |
| Bcl2l1 12048         | 1.186650512 | 0.106155825 | 1.075753125  | 0.222026173 |
| Oas1a 246730         | 1.186613973 | 0.292830975 | 1.36306092   | 0.135808472 |
| Tmem18 211986        | 1.186448892 | 0.168550321 | 1.077647024  | 0.324864857 |
| 2310045N01Rik 72368  | 1.186199354 | 0.121184763 | 1.110839467  | 0.229369167 |
| Nutf2 68051          | 1.186189265 | 0.103737334 | 1.085276183  | 0.215301595 |
| Wrb 71446            | 1.186075549 | 0.326673277 | 1.411703611  | 0.110933742 |
| Tmem135 72759        | 1.185877315 | 0.192830624 | 1.359527408  | 0.055208905 |
| Rnd1 223881          | 1.185736452 | 0.219112887 | 1.237078879  | 0.057917735 |
| Pdlim1 54132         | 1.185518768 | 0.059088253 | 1.115549005  | 0.12070504  |
| Mcm10 70024          | 1.185474679 | 0.1282708   | 1.290872472  | 0.022024612 |
| Vps29 56433          | 1.185368896 | 0.134827072 | 1.108000671  | 0.240871219 |
| Bcam 57278           | 1.185315606 | 0.260087534 | 1.001423074  | 0.497604965 |
| Ubfd1 28018          | 1.185223698 | 0.055905111 | 1.332697915  | 0.001306258 |
| Ren2 19702           | 1.185215559 | 0.416643489 | 1.150701957  | 0.450338304 |
| Sntg2 268534         | 1.18519724  | 0.307123503 | 1.759680614  | 0.031487133 |
| Bbs2 67378           | 1.185094329 | 0.302790958 | 1.471419608  | 0.131407284 |
| Acadsb 66885         | 1.184876155 | 0.042081542 | 1.112706689  | 0.072645506 |
| Atp6v0d2 242341      | 1.184813694 | 0.309312904 | 1.443441222  | 0.077261806 |
| Krcc1 57896          | 1.184605122 | 0.205931123 | 1.070251453  | 0.368021463 |
| Pid1 98496           | 1.184600574 | 0.124173314 | 1.184600574  | 0.124173314 |
| Ilvbl 216136         | 1.184509362 | 0.145683713 | 1.184509362  | 0.145683713 |
| Rpl19 19921          | 1.184444815 | 0.275072297 | 1.111013268  | 0.286493796 |
| Irak4 266632         | 1.184379498 | 0.145094979 | 1.16297901   | 0.136196633 |
| Acsm2 233799         | 1.184335482 | 0.402500128 | 2.35484547   | 0.137660468 |
| Obsl1 98733          | 1.184186147 | 0.366134053 | 1.184186147  | 0.366134053 |
| Nudcd2 52653         | 1.184089988 | 0.183789494 | 1.060917145  | 0.351985846 |
| Fbl 14113            | 1.184058642 | 0.174538082 | 1.054122836  | 0.362603177 |
| Ikzf4 22781          | 1.184042317 | 0.409955072 | 2.495036093  | 0.151126021 |
| Zfp71-rs1 235907     | 1.183995776 | 0.33171996  | -1.00805062  | 0.490755365 |
| Slc13a4 243755       | 1.183942021 | 0.414754484 | 1.178571429  | 0.43416     |
| Fam113b 239647       | 1.183926407 | 0.108344545 | 1.281412186  | 0.037561713 |
| Tubb5 22154          | 1.183876029 | 0.155599576 | 1.174779625  | 0.052605617 |
| Gm3833 100042415     | 1.183621596 | 0.272413012 | -1.213802317 | 0.046437947 |
| Rpl18a 76808         | 1.183611693 | 0.272242149 | -1.060702867 | 0.381338137 |
| Mki67 17345          | 1.183602513 | 0.39345127  | 1.622532447  | 0.256539303 |
| Igsf8 140559         | 1.183554344 | 0.254751364 | -1.020617752 | 0.459478067 |
| Dem1 73172           | 1.183486929 | 0.297433516 | 1.190219708  | 0.261201203 |
| Srf 20807            | 1.18344531  | 0.03469193  | 1.153304376  | 0.066867415 |
| Rps16 20055          | 1.183427207 | 0.227615003 | -1.000721854 | 0.498286826 |
| 2610204G22Rik 70448  | 1.183274414 | 0.394032592 | 1.820157617  | 0.207329861 |
| Btf3 218490          | 1.183176124 | 0.107731072 | 1.104678285  | 0.214085604 |
| Dgat1 13350          | 1.183075409 | 0.053897636 | 1.183075409  | 0.053897636 |
| Erich1 234086        | 1.182921768 | 0.328699917 | 1.458816847  | 0.182476319 |
| Det1 76375           | 1.182855961 | 0.272892765 | 1.182855961  | 0.272892765 |

|                      |             |             |              |             |
|----------------------|-------------|-------------|--------------|-------------|
| Paics 67054          | 1.182559649 | 0.011342728 | 1.099314219  | 0.018546965 |
| Nsun2 28114          | 1.182380805 | 0.091534912 | 1.14085252   | 0.014663493 |
| Fam117b 72750        | 1.182360677 | 0.22805723  | 1.182360677  | 0.22805723  |
| Pdia5 72599          | 1.182336497 | 0.095125102 | 1.166751348  | 0.035355607 |
| Gsg1 269994          | 1.182191812 | 0.405185128 | -1.615913663 | 0.244974828 |
| Timm8b 30057         | 1.182185374 | 0.100656718 | 1.283399414  | 0.027673453 |
| Kcng4 66733          | 1.182120928 | 0.428022407 | 1            | #DIV/0!     |
| Cdkn2a 12578         | 1.182120928 | 0.428022407 | 1            | #DIV/0!     |
| Pabpc1 381404        | 1.182120928 | 0.428022407 | 1            | #DIV/0!     |
| Rpl3 66211           | 1.182120928 | 0.428022407 | 1            | #DIV/0!     |
| Fkbp6 94244          | 1.182120928 | 0.428022407 | 1            | #DIV/0!     |
| Zfp488 382867        | 1.182120928 | 0.428022407 | 1            | #DIV/0!     |
| Lrrn1 16979          | 1.182120928 | 0.428022407 | 1            | #DIV/0!     |
| C330021F23Rik 546049 | 1.181984224 | 0.155126367 | -1.030133618 | 0.371268938 |
| 1700003E16Rik 71837  | 1.181968062 | 0.333234585 | 1.024008621  | 0.463101133 |
| Jag1 16449           | 1.181787905 | 0.323717692 | 1.731609106  | 0.043086369 |
| Eed 13626            | 1.181746347 | 0.254552197 | 1.181746347  | 0.254552197 |
| Mapre3 100732        | 1.181167838 | 0.155959883 | 1.232668873  | 0.07498346  |
| Setd4 224440         | 1.181128908 | 0.284839359 | 1.326352492  | 0.192598073 |
| Ccnj 380694          | 1.181022306 | 0.421598419 | -1.877217172 | 0.253663907 |
| 6330416G13Rik 230279 | 1.180845923 | 0.228969909 | 1.082198442  | 0.357818347 |
| Alyref 21681         | 1.180581461 | 0.138319128 | 1.388734669  | 0.00429947  |
| Phc2 54383           | 1.180382464 | 0.123118052 | 1.069142047  | 0.263936749 |
| Sec11a 56529         | 1.1801724   | 0.115483524 | 1.194403328  | 0.051022677 |
| 1110049F12Rik 66193  | 1.180125607 | 0.041006441 | 1.137098338  | 0.082478172 |
| Cyp2c70 226105       | 1.179949138 | 0.274058295 | -1.052616825 | 0.401456027 |
| Zhx2 387609          | 1.179903065 | 0.130447223 | 1.179903065  | 0.130447223 |
| 2610101N10Rik 67958  | 1.179770568 | 0.197113395 | 1.332629002  | 0.071716999 |
| Hspa5 14828          | 1.179683555 | 0.270902605 | 1.555132527  | 0.016082492 |
| Ms4a6c 73656         | 1.179388151 | 0.310135851 | 1.60489489   | 0.05706931  |
| Alkbh2 231642        | 1.179348104 | 0.337738901 | 1.006571262  | 0.48987436  |
| Pld6 194908          | 1.179217389 | 0.325013888 | -1.160691022 | 0.286672468 |
| Mical2 320878        | 1.178942528 | 0.108035441 | 1.178942528  | 0.108035441 |
| AI450353 103729      | 1.178847292 | 0.356542829 | 1.178847292  | 0.356542829 |
| Capn6 12338          | 1.17882635  | 0.356990855 | 1.618103207  | 0.16108132  |
| Gm13889 620695       | 1.178735394 | 0.303817351 | -1.047355103 | 0.437351724 |
| Bcl11b 58208         | 1.178601821 | 0.421093154 | -2.237469697 | 0.16135399  |
| Oas1g 23960          | 1.178588813 | 0.3168744   | 1.178588813  | 0.3168744   |
| Gpr35 64095          | 1.17832672  | 0.381964275 | 1.17832672   | 0.381964275 |
| Rnf121 75212         | 1.178211521 | 0.182524359 | 1.173770498  | 0.033554069 |
| 1810063B05Rik 67892  | 1.178080228 | 0.266745678 | 1.335352514  | 0.155912123 |
| Rpf1 70285           | 1.177910813 | 0.174682659 | 1.305222883  | 0.030465437 |
| St8sia4 20452        | 1.177668806 | 0.346301598 | -1.010311365 | 0.489160098 |
| Rpl35 66489          | 1.177549134 | 0.281395759 | 1.091016771  | 0.292208773 |
| Unc13a 382018        | 1.177437791 | 0.252864442 | 1.43037554   | 0.059997818 |
| Lrmp 16970           | 1.177309326 | 0.316962807 | 1.74132668   | 0.009645367 |
| Tbcb 66411           | 1.177227995 | 0.180464273 | 1.111550191  | 0.287098411 |
| Psmb4 19172          | 1.177139695 | 0.03627186  | 1.140903951  | 0.016161582 |
| Dek 110052           | 1.176886591 | 0.282063396 | 1.458104715  | 0.085903225 |
| Nop56 67134          | 1.176811712 | 0.094710155 | 1.144288381  | 0.036876904 |
| Emd 13726            | 1.176773451 | 0.111051359 | 1.016314838  | 0.419685429 |
| Cpd 12874            | 1.176639727 | 0.229909533 | 1.176639727  | 0.229909533 |
| Mrpl20 66448         | 1.176514981 | 0.099706353 | 1.176514981  | 0.099706353 |

|                      |             |             |              |             |
|----------------------|-------------|-------------|--------------|-------------|
| P4ha1 18451          | 1.17623276  | 0.107510883 | 1.257447347  | 0.047051917 |
| Rps10 67097          | 1.176135935 | 0.21073722  | -1.086884309 | 0.215598996 |
| Map3k10 269881       | 1.175795575 | 0.129420757 | 1.295547235  | 0.031189978 |
| Psmg4 69666          | 1.175678528 | 0.152661987 | 1.173268841  | 0.034725836 |
| Mob4 19070           | 1.175630651 | 0.130155114 | 1.361878018  | 0.00691945  |
| Gm7104 633093        | 1.175608    | 0.443532116 | 1            | #DIV/0!     |
| Klhl11 217194        | 1.175608    | 0.443532116 | 1            | #DIV/0!     |
| A930011G23Rik 319818 | 1.175608    | 0.443532116 | 1            | #DIV/0!     |
| Creld1 171508        | 1.175520891 | 0.085091343 | 1.345716106  | 0.00141864  |
| Csrnp2 207785        | 1.175344978 | 0.276893178 | -1.157808361 | 0.212410392 |
| Tpt1 22070           | 1.174915961 | 0.105933334 | 1.099880683  | 0.211341263 |
| Npm1 18148           | 1.174864101 | 0.077729521 | 1.11519827   | 0.151440312 |
| Dirc2 224132         | 1.174863208 | 0.031044038 | 1.120012933  | 0.05860479  |
| Ndufv2 72900         | 1.174839374 | 0.066811137 | 1.099017018  | 0.133347006 |
| Siah1b 20438         | 1.174522209 | 0.387266496 | -1.446519002 | 0.218759954 |
| Ercc4 50505          | 1.174106336 | 0.102826322 | 1.088869819  | 0.208861405 |
| Klhdc10 76788        | 1.174073736 | 0.050090265 | 1.174073736  | 0.050090265 |
| Bach1 12013          | 1.173920135 | 0.295534689 | 1.173920135  | 0.295534689 |
| Ccdc56 52469         | 1.173704883 | 0.069066431 | 1.173704883  | 0.069066431 |
| Rps5 20103           | 1.173376813 | 0.247802341 | 1.005389211  | 0.489408577 |
| Sf3b3 101943         | 1.173103228 | 0.20005747  | -1.051350049 | 0.35319757  |
| Psmg2 107047         | 1.173091231 | 0.204494644 | 1.173091231  | 0.204494644 |
| Lfng 16848           | 1.172978248 | 0.154526348 | 1.228326543  | 0.063942705 |
| Cdca3 14793          | 1.172877731 | 0.307214136 | 1.278539544  | 0.222389143 |
| Ikzf2 22779          | 1.172875241 | 0.363328849 | 2.108741018  | 0.024168518 |
| Polr1e 64424         | 1.172818575 | 0.303353189 | 1.172818575  | 0.303353189 |
| Uqcrfs1 66694        | 1.172801164 | 0.038766618 | 1.28220905   | 0.001092411 |
| Fgfr1 14182          | 1.172491711 | 0.216061367 | 1.172491711  | 0.216061367 |
| Rph3al 380714        | 1.172290899 | 0.412053421 | 1.084493596  | 0.441089956 |
| Coq7 12850           | 1.17213954  | 0.194816347 | 1.413498452  | 0.021166167 |
| Qsox1 104009         | 1.17209353  | 0.08011243  | 1.17209353   | 0.08011243  |
| Endog 13804          | 1.172086789 | 0.201382163 | -1.058084442 | 0.323968064 |
| Tmem39b 230770       | 1.172069524 | 0.193405627 | 1.301174193  | 0.041399441 |
| Pdcd2l 68079         | 1.171851759 | 0.191834205 | 1.067386321  | 0.34391782  |
| Comtd1 69156         | 1.171773922 | 0.3046897   | 1.260360927  | 0.170359931 |
| Msh3 17686           | 1.171600353 | 0.224001484 | 1.380935606  | 0.046562033 |
| Gm16378 100043225    | 1.171596188 | 0.107208361 | 1.143068534  | 0.074952438 |
| Heatr1 217995        | 1.171502394 | 0.109185084 | 1.171502394  | 0.109185084 |
| Kctd20 66989         | 1.1714123   | 0.228351574 | 1.062734717  | 0.378672248 |
| Ggnbp1 70772         | 1.171348433 | 0.252211962 | 1.042320495  | 0.310031783 |
| Pde4c 110385         | 1.171343106 | 0.201806268 | -1.062686715 | 0.303409685 |
| Rd3 74023            | 1.171243716 | 0.249042127 | -1.124031316 | 0.205364319 |
| Gpld1 14756          | 1.171222743 | 0.018197915 | 1.171222743  | 0.018197915 |
| Msr1 20288           | 1.171206812 | 0.278716692 | 1.033012044  | 0.447284978 |
| H2afv 77605          | 1.171038658 | 0.138076886 | 1.062322652  | 0.295419274 |
| Gm6402 623169        | 1.170960359 | 0.297026403 | 1.248691848  | 0.146319832 |
| Stxbp5 78808         | 1.170885014 | 0.262306772 | 1.170885014  | 0.262306772 |
| lah1 67732           | 1.170856119 | 0.108478344 | 1.012548835  | 0.436104511 |
| Wibg 78428           | 1.170782396 | 0.173097958 | 1.068927224  | 0.332787071 |
| Camk2b 12323         | 1.170778171 | 0.31311342  | 1.029345324  | 0.462381482 |
| Invs 16348           | 1.170739539 | 0.344282585 | 1.649026172  | 0.095718159 |
| Ing1 26356           | 1.170529275 | 0.231631973 | 1.33209139   | 0.09675943  |
| Vps25 28084          | 1.17049228  | 0.084596206 | 1.260726721  | 0.018971319 |

|                      |             |             |              |             |
|----------------------|-------------|-------------|--------------|-------------|
| Gucy1a3 60596        | 1.17047396  | 0.325979548 | 1.193308042  | 0.288094862 |
| Zfp30 22693          | 1.170350203 | 0.320980288 | 1.170350203  | 0.320980288 |
| Arhgef3 71704        | 1.17033403  | 0.232016782 | 1.284164276  | 0.082355092 |
| Acer2 230379         | 1.17027186  | 0.116068507 | 1.192137216  | 0.110344119 |
| Amigo1 229715        | 1.170131172 | 0.146482867 | 1.17086529   | 0.049633448 |
| Ost4 67695           | 1.169935176 | 0.105730979 | 1.022329602  | 0.391399232 |
| Snx20 71607          | 1.16987537  | 0.397590327 | -1.343191281 | 0.318876392 |
| Dhodh 56749          | 1.169815679 | 0.208175743 | 1.348312993  | 0.051155338 |
| Btf3l4 70533         | 1.169789813 | 0.050383888 | 1.169789813  | 0.050383888 |
| Tm4sf4 229302        | 1.169721133 | 0.058945068 | 1.111758546  | 0.120425985 |
| Mal2 105853          | 1.169646665 | 0.18028781  | 1.29502799   | 0.069205364 |
| Tomm6 66119          | 1.169608169 | 0.155016303 | 1.058134851  | 0.326115604 |
| Tmem120a 215210      | 1.169570319 | 0.125270212 | 1.204709348  | 0.100947304 |
| Dnaja4 58233         | 1.169464851 | 0.322417492 | 1.169464851  | 0.322417492 |
| Rchy1 68098          | 1.169427658 | 0.098516415 | 1.062334923  | 0.18463296  |
| Plaa 18786           | 1.169391076 | 0.125122892 | 1.266203196  | 0.019254721 |
| Cast 12380           | 1.169369473 | 0.204289185 | 1.161486469  | 0.203564326 |
| Mrfap1 67568         | 1.169247831 | 0.141385828 | 1.253906061  | 0.047044679 |
| Gnl1 14670           | 1.169034398 | 0.156771758 | 1.057822486  | 0.328670865 |
| Arhgef2 16800        | 1.169010956 | 0.222329297 | 1.169010956  | 0.222329297 |
| Dpt 56429            | 1.168935665 | 0.284421422 | -1.142763393 | 0.270404893 |
| Ccdc73 211936        | 1.16879777  | 0.418648431 | 1.002806537  | 0.498817668 |
| Ccdc21 70012         | 1.168170258 | 0.324435737 | -1.141247725 | 0.301490639 |
| Mfsd8 72175          | 1.167941678 | 0.303162384 | 1.37456662   | 0.163370081 |
| Sbds 66711           | 1.167753025 | 0.029382574 | 1.071585446  | 0.094296807 |
| Cab39 69008          | 1.167697955 | 0.167389574 | 1.317694259  | 0.019909718 |
| Inhba 16323          | 1.167544183 | 0.322468047 | 1.388818085  | 0.116154653 |
| Mapk11 19094         | 1.167455853 | 0.289251654 | 1.167455853  | 0.289251654 |
| Sec23a 20334         | 1.167436829 | 0.265962309 | 1.183101409  | 0.215076752 |
| Hmgb3 15354          | 1.16740487  | 0.170131822 | 1.413013934  | 0.003839748 |
| Alkbh6 233065        | 1.167197437 | 0.08982849  | 1.185310004  | 0.031165971 |
| Ppil3 70225          | 1.167194556 | 0.210475405 | 1.035943258  | 0.416553152 |
| Kctd7 212919         | 1.166926821 | 0.387623365 | -1.088974331 | 0.434485817 |
| Ndufb6 230075        | 1.16680291  | 0.017887747 | 1.110766516  | 0.025493214 |
| Cdk4 12567           | 1.166701409 | 0.194285655 | -1.04796512  | 0.344111912 |
| Mki67ip 67949        | 1.166683132 | 0.17408844  | 1.069567924  | 0.321268149 |
| Pacrg 69310          | 1.166666667 | 0.433741809 | 1            | #DIV/0!     |
| Baiap2l2 207495      | 1.166666667 | 0.433741809 | 1            | #DIV/0!     |
| Bmp10 12154          | 1.166666667 | 0.433741809 | 1            | #DIV/0!     |
| Chrdl1 83453         | 1.166666667 | 0.433741809 | 1            | #DIV/0!     |
| Gm13238 236069       | 1.166666667 | 0.433741809 | 1            | #DIV/0!     |
| Ttc22 230576         | 1.166666667 | 0.433741809 | 1            | #DIV/0!     |
| Zscan10 332221       | 1.166666667 | 0.433741809 | 1            | #DIV/0!     |
| Chgb 12653           | 1.166666667 | 0.433741809 | 1            | #DIV/0!     |
| Mmp27 234911         | 1.166666667 | 0.433741809 | 1            | #DIV/0!     |
| Dhh 13363            | 1.166666667 | 0.433741809 | 1            | #DIV/0!     |
| D830030K20Rik 320333 | 1.166666667 | 0.433741809 | 1            | #DIV/0!     |
| Cxhc4 319478         | 1.166666667 | 0.433741809 | 1            | #DIV/0!     |
| 5430405G05Rik 108832 | 1.166666667 | 0.433741809 | 1            | #DIV/0!     |
| Rnaseh2a 69724       | 1.166653034 | 0.160111596 | 1.195747965  | 0.101706556 |
| Osgin1 71839         | 1.16660773  | 0.296477255 | -1.036254343 | 0.445502778 |
| Arpc1a 56443         | 1.166321998 | 0.014073803 | 1.134148248  | 0.030524625 |
| Wnt5b 22419          | 1.166311979 | 0.27185553  | 1.561395254  | 0.009759317 |



|                      |             |             |              |             |
|----------------------|-------------|-------------|--------------|-------------|
| Rassf4 213391        | 1.165965297 | 0.298663824 | -1.188779916 | 0.208442043 |
| Mms19 72199          | 1.165895297 | 0.158131813 | 1.165895297  | 0.158131813 |
| Nsmaf 18201          | 1.165758579 | 0.279015627 | 1.208642219  | 0.202194994 |
| Smcr7l 239555        | 1.16572152  | 0.126726692 | 1.16572152   | 0.126726692 |
| Ogfod1 270086        | 1.165707974 | 0.246182461 | 1.165707974  | 0.246182461 |
| Cox4i1 12857         | 1.165702504 | 0.191239571 | 1.048661701  | 0.379010864 |
| B230120H23Rik 65964  | 1.165668099 | 0.203389292 | 1.158128358  | 0.113607191 |
| Rsb1 229675          | 1.165620097 | 0.426363226 | 2.791782706  | 0.160879221 |
| Ostb 330962          | 1.165607184 | 0.42418314  | -2.583325975 | 0.0615742   |
| Asb8 78541           | 1.165604581 | 0.047166197 | 1.219838404  | 0.010565331 |
| Fam115a 77574        | 1.165278719 | 0.388616192 | 1.625890204  | 0.215871312 |
| Dcaf12l1 245404      | 1.165151326 | 0.369954098 | -1.416853238 | 0.186792482 |
| Rgl2 19732           | 1.165104123 | 0.070782252 | 1.209133685  | 0.007229236 |
| C030046l01Rik 109284 | 1.165006301 | 0.068804386 | 1.0845802    | 0.128166682 |
| Cdk7 12572           | 1.164875459 | 0.101935362 | 1.011544208  | 0.427996311 |
| Grn 14824            | 1.164765129 | 0.062194536 | 1.24194931   | 0.012229376 |
| Angpt2 11601         | 1.164692899 | 0.393499011 | 1.164692899  | 0.393499011 |
| Chfr 231600          | 1.164470396 | 0.226213388 | 1.083080115  | 0.353731045 |
| Wdr43 72515          | 1.164405924 | 0.019743762 | 1.109789778  | 0.031234034 |
| Wtip 101543          | 1.164404941 | 0.352076436 | 1.150012803  | 0.295984863 |
| Psmb7 19177          | 1.164348704 | 0.08163882  | 1.08772598   | 0.167684911 |
| Agfg1 15463          | 1.164322887 | 0.263260067 | 1.240147341  | 0.127425522 |
| Zfp26 22688          | 1.164279988 | 0.292748059 | 1.164279988  | 0.292748059 |
| Jun 16476            | 1.164131667 | 0.254323394 | 1.164131667  | 0.254323394 |
| Rab27a 11891         | 1.164090272 | 0.264119268 | 1.256422555  | 0.197077496 |
| Nat8 68396           | 1.16401302  | 0.385167083 | 1.587020173  | 0.217829834 |
| Gm5148 381438        | 1.163854664 | 0.180585177 | -1.045202742 | 0.3255113   |
| Nlrc4 268973         | 1.16372579  | 0.422523456 | 3.168797619  | 0.09792829  |
| Swap70 20947         | 1.163702847 | 0.280855531 | 1.278592757  | 0.167460027 |
| Psmg3 66506          | 1.163669249 | 0.195591639 | 1.257030467  | 0.086325629 |
| Naca 17938           | 1.163640791 | 0.120103657 | 1.017576566  | 0.427177022 |
| A1462493 107197      | 1.163559204 | 0.230163474 | 1.019022719  | 0.457423985 |
| Dnaja1 15502         | 1.163535621 | 0.157059608 | 1.332777518  | 0.007498539 |
| Narf 67608           | 1.163408155 | 0.20905417  | 1.44220022   | 0.008961513 |
| Nol10 217431         | 1.163387431 | 0.099181254 | 1.163387431  | 0.099181254 |
| Pabpn1 54196         | 1.16333846  | 0.161996896 | 1.16333846   | 0.161996896 |
| G3bp1 27041          | 1.1633089   | 0.049287991 | 1.224948705  | 0.014284447 |
| 4933432B09Rik 75729  | 1.163217594 | 0.392816686 | 1.163217594  | 0.392816686 |
| Gm5595 434179        | 1.163196616 | 0.390918424 | -1.05368395  | 0.461995549 |
| Ccdc8 434130         | 1.163186547 | 0.41543557  | 2.766348671  | 0.092098057 |
| Atp6v1b2 11966       | 1.163110264 | 0.118727428 | 1.114058547  | 0.139578995 |
| Cd74 16149           | 1.163023583 | 0.327431044 | -1.093577488 | 0.274410385 |
| Senp7 66315          | 1.162996105 | 0.27425017  | 1.419020146  | 0.068828883 |
| Ube2s 77891          | 1.162939481 | 0.26677358  | 1.162939481  | 0.26677358  |
| Scn1b 20266          | 1.162810817 | 0.223426378 | 1.380876061  | 0.02753551  |
| Dcun1d5 76863        | 1.162803367 | 0.156541447 | 1.162803367  | 0.156541447 |
| Dpf3 70127           | 1.162690923 | 0.295279255 | -1.035283093 | 0.407842961 |
| 0610009D07Rik 66055  | 1.162425057 | 0.151763494 | 1.172315132  | 0.099143558 |
| Ncl 17975            | 1.162234905 | 0.193762659 | 1.038265138  | 0.397955814 |
| 1600002H07Rik 72016  | 1.162219803 | 0.147470103 | 1.162219803  | 0.147470103 |
| Adck4 76889          | 1.162192222 | 0.270609737 | -1.066939332 | 0.327854648 |
| Tnfrsf10b 21933      | 1.162185708 | 0.365667533 | 1.162185708  | 0.365667533 |
| E030024N20Rik 595139 | 1.162143576 | 0.145923907 | 1.150733776  | 0.083601265 |

|                      |             |             |              |             |
|----------------------|-------------|-------------|--------------|-------------|
| Spata24 71242        | 1.162077256 | 0.271313675 | 1.009113988  | 0.482271509 |
| Rpl27 19942          | 1.16196737  | 0.194773839 | -1.049931577 | 0.334810077 |
| Erp44 76299          | 1.161751203 | 0.027216292 | 1.171610047  | 0.007587586 |
| Cct5 12465           | 1.161645811 | 0.086294276 | 1.208354185  | 0.00556123  |
| Lrch4 231798         | 1.161566992 | 0.410569179 | -1.394599698 | 0.322100701 |
| Cpm 70574            | 1.161323527 | 0.256909404 | 1.071979224  | 0.346473023 |
| Cbfa2t2 12396        | 1.16130561  | 0.275215492 | 1.317867311  | 0.152013569 |
| Rps3 27050           | 1.161283059 | 0.239764654 | 1.004836475  | 0.488985137 |
| Snhg7 72091          | 1.161280123 | 0.393876865 | -1.503998666 | 0.17396124  |
| S100a13 20196        | 1.161095588 | 0.281465999 | -1.028224717 | 0.4500283   |
| Zfp566 72556         | 1.16108863  | 0.390553888 | 1.16108863   | 0.390553888 |
| Adamts13 279028      | 1.161087794 | 0.215393751 | 1.455447902  | 0.007272478 |
| Aldoa 11674          | 1.160848782 | 0.093102509 | 1.109875596  | 0.175892906 |
| D18Erttd653e 52662   | 1.160774387 | 0.285201452 | -1.005633676 | 0.49097026  |
| Shfm1 20422          | 1.160688232 | 0.202178811 | -1.048296868 | 0.355674858 |
| Rpl13 270106         | 1.160592669 | 0.271582858 | -1.159189434 | 0.14998973  |
| Atp5i 27425          | 1.160436789 | 0.24368019  | -1.103942301 | 0.242373302 |
| Lmod1 93689          | 1.160402055 | 0.386720902 | 1.439603776  | 0.177448313 |
| Zbtb46 72147         | 1.160305793 | 0.375924678 | -1.153811245 | 0.383911645 |
| Snx25 102141         | 1.160003706 | 0.263464496 | -1.025366411 | 0.445767895 |
| Jmy 57748            | 1.159937187 | 0.375209935 | 1.054640109  | 0.440921962 |
| Tigit 100043314      | 1.159865072 | 0.427102472 | 1.099838978  | 0.465920044 |
| Cog6 67542           | 1.15986367  | 0.300462768 | 1.315429802  | 0.143214961 |
| Prdm16 70673         | 1.159776501 | 0.400376053 | 1.159776501  | 0.400376053 |
| Snhg8 69895          | 1.159746502 | 0.267669868 | -1.017098338 | 0.466398702 |
| Tex9 21778           | 1.159733333 | 0.42415282  | 1.178571429  | 0.43416     |
| Dtymk 21915          | 1.159629695 | 0.117022409 | 1.091985778  | 0.220797368 |
| Slc2a3 20527         | 1.159487881 | 0.383230263 | -1.2570926   | 0.316762244 |
| E130201H02Rik 78552  | 1.159472653 | 0.341311184 | -1.030077964 | 0.462411479 |
| Snrnp40 66585        | 1.159433418 | 0.260569003 | 1.203209039  | 0.197828705 |
| Cd300a 217303        | 1.159361331 | 0.207364167 | 1.044708098  | 0.395475592 |
| Mfap1a 67532         | 1.159227979 | 0.247401194 | 1.150932581  | 0.21751729  |
| Kin 16588            | 1.15921373  | 0.099930596 | 1.202714858  | 0.039777699 |
| Pglyrp2 57757        | 1.158971254 | 0.025995486 | 1.103180202  | 0.044345243 |
| Ndufaf2 75597        | 1.158897299 | 0.132607238 | 1.338834807  | 0.005113125 |
| Slc2a10 170441       | 1.158863651 | 0.436660012 | 1            | #DIV/0!     |
| Hipk4 233020         | 1.158863651 | 0.436660012 | 1            | #DIV/0!     |
| Synpo2 118449        | 1.158863651 | 0.436660012 | 1            | #DIV/0!     |
| Nkain2 432450        | 1.158863651 | 0.436660012 | 1            | #DIV/0!     |
| Lpar4 78134          | 1.158863651 | 0.436660012 | 1            | #DIV/0!     |
| 4932441J04Rik 319216 | 1.158863651 | 0.436660012 | 1            | #DIV/0!     |
| C330027C09Rik 224171 | 1.158863651 | 0.436660012 | 1            | #DIV/0!     |
| 9530026P05Rik 330385 | 1.158863651 | 0.436660012 | 1            | #DIV/0!     |
| Mrpl54 66047         | 1.158764347 | 0.105379825 | 1.094898494  | 0.206662337 |
| Gtpbp4 69237         | 1.158742929 | 0.177955077 | 1.074655078  | 0.321482798 |
| Id2 15902            | 1.158422734 | 0.255485487 | 1.355247924  | 0.082215697 |
| Smap1 98366          | 1.158205772 | 0.197489994 | 1.419911954  | 0.006595859 |
| St8sia3 20451        | 1.158067954 | 0.397489773 | -1.431454432 | 0.242113817 |
| Neurl2 415115        | 1.158045109 | 0.353358389 | -1.060786023 | 0.442233181 |
| 2310037I24Rik 69612  | 1.158034297 | 0.242912253 | 1.241087173  | 0.026669592 |
| Bsdcl1 100383        | 1.157688612 | 0.060077883 | 1.060041575  | 0.208077039 |
| Depdc7 211896        | 1.157570045 | 0.290247252 | 1.091007119  | 0.382737645 |
| Prrt4 101359         | 1.157231515 | 0.445548341 | 1            | #DIV/0!     |

|                      |             |             |              |             |
|----------------------|-------------|-------------|--------------|-------------|
| Comp 12845           | 1.157231515 | 0.445548341 | 1            | #DIV/0!     |
| Sema4f 20355         | 1.157231515 | 0.445548341 | 1            | #DIV/0!     |
| Nfkb2 18034          | 1.156492186 | 0.27321381  | 1.049475562  | 0.344348599 |
| Fxr1 14359           | 1.156478678 | 0.149642465 | 1.266586697  | 0.042114686 |
| Zbtb37 240869        | 1.15646318  | 0.413262928 | 1.15646318   | 0.413262928 |
| Sptlc2 20773         | 1.156366172 | 0.136803192 | 1.156366172  | 0.136803192 |
| Taf9 108143          | 1.156349987 | 0.156995475 | 1.259026828  | 0.056900966 |
| S1pr2 14739          | 1.156140399 | 0.18042108  | -1.024986793 | 0.410261811 |
| Sema4d 20354         | 1.156082168 | 0.36873617  | -1.188755473 | 0.334695565 |
| Mak16 67920          | 1.156070102 | 0.196802718 | 1.156070102  | 0.196802718 |
| Arhgap25 232201      | 1.1558242   | 0.356740394 | -1.245578467 | 0.212444371 |
| Gm10136 672214       | 1.15577187  | 0.320520934 | 1.105995862  | 0.288734726 |
| Nsmce1 67711         | 1.155681751 | 0.124442583 | 1.072529095  | 0.169192818 |
| Psemb5 19173         | 1.155672019 | 0.023221132 | 1.166185418  | 0.008130138 |
| Ctnnb1 12387         | 1.155620734 | 0.213534459 | 1.300019028  | 0.073073705 |
| Cd3e 12501           | 1.155611435 | 0.362793964 | 1.040642049  | 0.4569728   |
| Atp5g2 67942         | 1.155593618 | 0.204099209 | 1.013339023  | 0.457785882 |
| Pcdhgb8 93705        | 1.155503877 | 0.054290458 | 1.18096429   | 0.011554789 |
| 9530068E07Rik 213673 | 1.1554161   | 0.048928813 | 1.1554161    | 0.048928813 |
| Siah2 20439          | 1.154983427 | 0.202483011 | 1.309049058  | 0.049261957 |
| Mrgpre 244238        | 1.15490362  | 0.269846423 | 1.205414388  | 0.079817368 |
| Zfp108 54678         | 1.154856193 | 0.380059341 | -1.231043035 | 0.322061312 |
| Zfp954 232853        | 1.154842106 | 0.244402994 | 1.085031702  | 0.273145666 |
| Pgls 66171           | 1.154821193 | 0.233026807 | 1.045123782  | 0.401365571 |
| Jdp2 81703           | 1.154787722 | 0.201918613 | 1.235510412  | 0.105485418 |
| Lpcat3 14792         | 1.15478236  | 0.113662177 | 1.098560146  | 0.20592672  |
| Skp1a 21402          | 1.154680651 | 0.091834578 | 1.15013522   | 0.045301882 |
| Rhob 11852           | 1.154665872 | 0.145183055 | 1.066110938  | 0.294161365 |
| Clec12a 232413       | 1.154616706 | 0.371418162 | 1.177925184  | 0.351610501 |
| 2310061C15Rik 66531  | 1.154493819 | 0.245812092 | 1.016275506  | 0.46574485  |
| Rnd3 74194           | 1.154484219 | 0.252854126 | 1.474771095  | 0.01565874  |
| Magix 54634          | 1.154480294 | 0.167928755 | 1.154480294  | 0.167928755 |
| Ttc1 66827           | 1.154440193 | 0.14431398  | 1.220945005  | 0.066081082 |
| Fam108b 226016       | 1.154355974 | 0.258856484 | 1.298445479  | 0.083462925 |
| Gpx4 625249          | 1.154113326 | 0.294541533 | -1.094639131 | 0.289155216 |
| 1600027N09Rik 73247  | 1.154040115 | 0.319636713 | 1.154040115  | 0.319636713 |
| Trim28 21849         | 1.153950477 | 0.093025743 | 1.083236638  | 0.191763239 |
| Atg2b 76559          | 1.153937051 | 0.073648238 | 1.104631096  | 0.146358617 |
| Lrpprc 72416         | 1.153858453 | 0.151294172 | 1.349662266  | 0.004039182 |
| H2afj 232440         | 1.153724189 | 0.270759701 | -1.124178559 | 0.246690797 |
| Usmg5 66477          | 1.153600181 | 0.181695062 | 1.153600181  | 0.181695062 |
| Gm8801 667766        | 1.153553769 | 0.376751597 | 1.153553769  | 0.376751597 |
| Prpf18 67229         | 1.15348798  | 0.107726971 | 1.053673082  | 0.224191991 |
| Insc 233752          | 1.153110454 | 0.302208661 | -1.077509962 | 0.360753886 |
| Pigyl 66268          | 1.153105171 | 0.191516606 | -1.046125705 | 0.30708359  |
| Heph 15203           | 1.153024677 | 0.422186822 | -1.663186782 | 0.253509159 |
| Cdkn1b 12576         | 1.152897888 | 0.225860238 | 1.311565417  | 0.070227029 |
| Ift74 67694          | 1.152871266 | 0.330895973 | 1.290577351  | 0.242177014 |
| Ak4 11639            | 1.152830256 | 0.204293294 | 1.152830256  | 0.204293294 |
| Smndc1 76479         | 1.152735978 | 0.286424268 | 1.064160638  | 0.409600658 |
| Tiprl 226591         | 1.152683772 | 0.146654626 | 1.140238104  | 0.119680473 |
| Aass 30956           | 1.152570097 | 0.309987163 | 1.390726403  | 0.130387816 |
| Mef2d 17261          | 1.152495196 | 0.304971442 | 1.174122496  | 0.276934983 |

|                          |             |             |              |             |
|--------------------------|-------------|-------------|--------------|-------------|
| Tbc1d8b 245638           | 1.152375961 | 0.377418904 | 1.521317836  | 0.149729106 |
| Vamp8 22320              | 1.152347821 | 0.22647601  | 1.029645966  | 0.431791392 |
| Dock4 238130             | 1.15229137  | 0.311044225 | 1.300049053  | 0.111134036 |
| Dhps 330817              | 1.152291368 | 0.132844251 | 1.00235009   | 0.489134741 |
| Lcor 212391              | 1.152137571 | 0.425454842 | -1.614048851 | 0.284375762 |
| Efna5 13640              | 1.152063638 | 0.205023312 | 1.079351604  | 0.33334727  |
| 1700030J22Rik 69528      | 1.152006208 | 0.388445953 | 1.152006208  | 0.388445953 |
| Napsa 16541              | 1.151815193 | 0.411039032 | 1.916350438  | 0.182743304 |
| Gaa 14387                | 1.151801279 | 0.055390277 | 1.151801279  | 0.055390277 |
| Mfap3 216760             | 1.151748925 | 0.122951198 | 1.252457366  | 0.025391592 |
| 2210010C17Rik 70080      | 1.151526102 | 0.380952436 | 1.650881959  | 0.154686998 |
| Sos2 20663               | 1.151369088 | 0.359803619 | 1.233218732  | 0.303312009 |
| Rnf168 70238             | 1.15135242  | 0.207714434 | 1.154611902  | 0.121747615 |
| 2810403D21Rik 69964      | 1.151218104 | 0.400387548 | 1.151218104  | 0.400387548 |
| Adh6-ps1 639769          | 1.151162081 | 0.305397146 | -1.162378606 | 0.239477405 |
| Gcc1 74375               | 1.151037315 | 0.182391239 | 1.034015682  | 0.383151451 |
| G6pc 14377               | 1.151007545 | 0.274037951 | 1.064312321  | 0.394797327 |
| Cnot8 69125              | 1.150936069 | 0.083361293 | 1.068445197  | 0.159274431 |
| LOC100504473 100504473   | 1.150894388 | 0.430487538 | 2.576568707  | 0.106702947 |
| Pparg 19016              | 1.15088923  | 0.293701391 | 1.15088923   | 0.293701391 |
| Cryz1 66609              | 1.150805703 | 0.215852189 | 1.272482765  | 0.053996072 |
| Esam 69524               | 1.150711804 | 0.175655103 | 1.059971999  | 0.328439467 |
| Etohi1 626848            | 1.150623729 | 0.416440009 | -1.407238997 | 0.319263545 |
| Zfp580 68992             | 1.150535616 | 0.296061387 | 1.616834636  | 0.004819577 |
| Srpk1 20815              | 1.150382119 | 0.156933755 | 1.345290454  | 0.006590245 |
| Prdx4 53381              | 1.150273689 | 0.093439211 | 1.150273689  | 0.093439211 |
| E330033B04Rik 319722     | 1.150229946 | 0.34780849  | 1.020818976  | 0.476145749 |
| Atic 108147              | 1.150214756 | 0.019100404 | 1.115890919  | 0.03911489  |
| Tcf7l2 21416             | 1.150184632 | 0.233505876 | 1.476805727  | 0.001312228 |
| Gtf2h3 209357            | 1.149901225 | 0.166920515 | 1.053200566  | 0.338156921 |
| Cnr2 12802               | 1.149808175 | 0.381493918 | 1.644864333  | 0.154547274 |
| Ckap4 216197             | 1.149756151 | 0.241031984 | 1.267699622  | 0.036938109 |
| Slc30a9 109108           | 1.149586158 | 0.037097662 | 1.215659659  | 0.003033565 |
| 1700047I17Rik2 100101807 | 1.149492227 | 0.305742056 | -1.205843392 | 0.123638566 |
| Chst15 77590             | 1.149486002 | 0.178056572 | 1.2903516    | 0.030521837 |
| Vamp4 53330              | 1.149475472 | 0.345007029 | 1.2819547    | 0.264378606 |
| Atp1a2 98660             | 1.149367457 | 0.354669091 | 1.191949507  | 0.273889597 |
| Xpnp1 170750             | 1.149317698 | 0.074792067 | 1.070477321  | 0.145582351 |
| Exosc9 50911             | 1.149308754 | 0.078341409 | 1.149308754  | 0.078341409 |
| Anp32b 67628             | 1.149143936 | 0.160820272 | 1.149143936  | 0.160820272 |
| Sp2 78912                | 1.148946012 | 0.252633255 | 1.294856266  | 0.114937715 |
| Rbm39 170791             | 1.148863664 | 0.2566526   | 1.112561476  | 0.196730077 |
| Wdr82 77305              | 1.148688329 | 0.168119267 | 1.175179258  | 0.031167568 |
| Slc29a3 71279            | 1.148686174 | 0.211083582 | -1.04225567  | 0.378859139 |
| Zfp367 238673            | 1.148586721 | 0.380241335 | 2.023635437  | 0.032752292 |
| Cd27 21940               | 1.148374263 | 0.342977156 | -1.26938726  | 0.189216339 |
| Eml4 78798               | 1.148320134 | 0.223104508 | 1.148320134  | 0.223104508 |
| Zfp280c 208968           | 1.148136411 | 0.316432902 | 1.309933983  | 0.148653935 |
| Morn1 76866              | 1.148074205 | 0.201780852 | 1.148074205  | 0.201780852 |
| Nudt4 71207              | 1.147880325 | 0.149922018 | -1.003016843 | 0.487691114 |
| Rps18 20084              | 1.147796218 | 0.247494157 | -1.103808775 | 0.221336896 |
| Metap1 75624             | 1.147680411 | 0.128042182 | 1.147680411  | 0.128042182 |
| Manf 74840               | 1.147546987 | 0.300922162 | 1.345909771  | 0.059520841 |

|                      |             |             |              |             |
|----------------------|-------------|-------------|--------------|-------------|
| Fbxl4 269514         | 1.147545327 | 0.231743279 | -1.082771844 | 0.258045092 |
| Tank 21353           | 1.14749013  | 0.309248619 | -1.193182823 | 0.185740966 |
| Smad7 17131          | 1.147475348 | 0.282627374 | 1.30046826   | 0.093570855 |
| Rabac1 14470         | 1.147469858 | 0.228167097 | -1.077817808 | 0.266112061 |
| Pitpna 18738         | 1.147278383 | 0.037906978 | 1.238365146  | 0.001224966 |
| Ticam2 225471        | 1.147262611 | 0.409276791 | 1.147262611  | 0.409276791 |
| Rtcd1 66368          | 1.147247867 | 0.271168657 | -1.001060614 | 0.497937235 |
| D930014E17Rik 57373  | 1.147173058 | 0.240458063 | 1.1329362    | 0.219793462 |
| 1810008A18Rik 108707 | 1.147095631 | 0.045152134 | 1.181709484  | 0.022220303 |
| Ppp3cb 19056         | 1.147094067 | 0.243247833 | 1.370295576  | 0.023640302 |
| Ube2g2 22213         | 1.146991867 | 0.128812193 | 1.218949174  | 0.058184933 |
| Rpl12 269261         | 1.146780407 | 0.193425371 | 1.241267495  | 0.066158631 |
| Synrg 217030         | 1.146747203 | 0.103256654 | 1.058061795  | 0.212095793 |
| Renbp 19703          | 1.146700664 | 0.392245954 | -1.008682268 | 0.490291882 |
| St14 19143           | 1.146683414 | 0.354306866 | 1.146683414  | 0.354306866 |
| Txnip 56338          | 1.146658803 | 0.320872325 | 1.40486523   | 0.027058171 |
| Fis1 66437           | 1.146652363 | 0.253451855 | 1.115498683  | 0.231963044 |
| B3gat3 72727         | 1.146626863 | 0.114697486 | 1.068034916  | 0.239492441 |
| Pef1 67898           | 1.146612669 | 0.072909497 | 1.146612669  | 0.072909497 |
| Usp14 59025          | 1.146325399 | 0.194757852 | 1.280972096  | 0.050088798 |
| Trim12c 319236       | 1.146198681 | 0.363380635 | 1.831209364  | 0.027928897 |
| Rpl14 67115          | 1.145951889 | 0.336231052 | -1.151888494 | 0.270239397 |
| Pik3c2a 18704        | 1.145707543 | 0.330411407 | 1.282224412  | 0.159462641 |
| Cisd1 52637          | 1.145553251 | 0.070653377 | 1.076357976  | 0.142242834 |
| Sft2d3 67158         | 1.145461014 | 0.318802304 | 1.440978688  | 0.090072852 |
| Gpaa1 14731          | 1.145384349 | 0.181629971 | 1.145384349  | 0.181629971 |
| Lbh 77889            | 1.145240221 | 0.252759473 | 1.119377337  | 0.171593383 |
| Chtf8 214987         | 1.145085352 | 0.138428473 | 1.145085352  | 0.138428473 |
| Zmynd15 574428       | 1.14505623  | 0.267237934 | -1.031001786 | 0.426185194 |
| Abhd4 105501         | 1.144981009 | 0.031513073 | 1.144981009  | 0.031513073 |
| 0610007L01Rik 71667  | 1.144961907 | 0.055709044 | 1.20764869   | 0.011276811 |
| Fam120b 67544        | 1.144839514 | 0.087984046 | 1.221247667  | 0.019095162 |
| Capn1 12333          | 1.144815551 | 0.075825706 | 1.194300156  | 0.037333779 |
| Dhx35 71715          | 1.144810795 | 0.35470205  | 1.609090033  | 0.071056997 |
| Ccne2 12448          | 1.144753102 | 0.422299942 | 2.126739986  | 0.17308943  |
| D430019H16Rik 268595 | 1.144436299 | 0.365012227 | 1.780720553  | 0.042091528 |
| Samm50 68653         | 1.144365379 | 0.108445708 | 1.16789019   | 0.09471146  |
| Mpv17l2 234384       | 1.144167044 | 0.177634255 | -1.009504641 | 0.466316061 |
| Ddx28 71986          | 1.14406509  | 0.191303223 | 1.14406509   | 0.191303223 |
| 2310030G06Rik 66952  | 1.144052767 | 0.151660953 | 1.144052767  | 0.151660953 |
| Ccl21c 65956         | 1.144025586 | 0.391061623 | 1.138958497  | 0.361880689 |
| Gm10591 100504239    | 1.144025586 | 0.391061623 | 1.138958497  | 0.361880689 |
| Arpc3 56378          | 1.143942789 | 0.12561684  | 1.30128801   | 0.005237241 |
| Foxred1 235169       | 1.143745245 | 0.168433428 | 1.232432059  | 0.04603072  |
| Naa50 72117          | 1.143641405 | 0.128330051 | 1.143641405  | 0.128330051 |
| Slc39a1 30791        | 1.143638147 | 0.113894953 | 1.112655793  | 0.118062444 |
| Cacna1d 12289        | 1.143563005 | 0.249994897 | 1.143563005  | 0.249994897 |
| Fam83d 71878         | 1.14348201  | 0.450025457 | 1            | #DIV/0!     |
| Tekt4 71840          | 1.14348201  | 0.450025457 | 1            | #DIV/0!     |
| C1ql1 23829          | 1.14348201  | 0.450025457 | 1            | #DIV/0!     |
| Spag5 54141          | 1.14348201  | 0.450025457 | 1            | #DIV/0!     |
| Nudt17 78373         | 1.14348201  | 0.450025457 | 1            | #DIV/0!     |
| 5430427O19Rik 71398  | 1.14348201  | 0.450025457 | 1            | #DIV/0!     |

|                      |             |             |              |             |
|----------------------|-------------|-------------|--------------|-------------|
| Zfp872 619310        | 1.14348201  | 0.450025457 | 1            | #DIV/0!     |
| BC024582 414068      | 1.14348201  | 0.450025457 | 1            | #DIV/0!     |
| Ndufa6 67130         | 1.143476879 | 0.135858292 | 1.001551438  | 0.492395302 |
| Hras1 15461          | 1.143414104 | 0.298434618 | 1.128748388  | 0.217907704 |
| Hint1 15254          | 1.143400985 | 0.211927471 | -1.062040118 | 0.286834604 |
| Paqr3 231474         | 1.143379295 | 0.308831503 | -1.000843117 | 0.498757991 |
| Mtl5 17771           | 1.143260807 | 0.413969596 | 1.881281608  | 0.182743554 |
| Exoc5 105504         | 1.143223752 | 0.285667422 | 1.143223752  | 0.285667422 |
| H2-Q7 15018          | 1.143156813 | 0.096735321 | 1.23580479   | 0.010156905 |
| Nrbp1 192292         | 1.143123872 | 0.140544215 | 1.054536436  | 0.296559001 |
| Cno 117197           | 1.143069842 | 0.330839592 | 1.143069842  | 0.330839592 |
| Lass5 71949          | 1.143066848 | 0.267008706 | 1.435849664  | 0.013010336 |
| Slc17a9 228993       | 1.143040749 | 0.245983383 | 1.361964435  | 0.023816933 |
| Med6 69792           | 1.142997705 | 0.33935336  | 1.062377199  | 0.428313441 |
| Rbbp7 245688         | 1.142791516 | 0.153899709 | 1.068154596  | 0.286925005 |
| Cmtm3 68119          | 1.142752314 | 0.207281152 | 1.212386229  | 0.140037366 |
| Klhdc5 232539        | 1.142610491 | 0.262588306 | -1.010800741 | 0.475512676 |
| BC039771 408057      | 1.142564442 | 0.42572511  | 1.047677258  | 0.477214915 |
| Ofd1 237222          | 1.142365734 | 0.304038421 | 1.399286551  | 0.083838302 |
| Arl6ip6 65103        | 1.142355558 | 0.304081113 | 1.142355558  | 0.304081113 |
| Tcta 102791          | 1.142322477 | 0.217434885 | -1.057014325 | 0.321258859 |
| Nek3 23954           | 1.142290982 | 0.345202243 | 1.191288201  | 0.291516057 |
| Cd3eap 70333         | 1.142021653 | 0.134701682 | 1.058106697  | 0.282115022 |
| Nkiras1 69721        | 1.141973969 | 0.148527595 | 1.141973969  | 0.148527595 |
| Ufd1l 22230          | 1.141856707 | 0.079100598 | 1.141856707  | 0.079100598 |
| H2-Eb1 14969         | 1.141849202 | 0.358026813 | -1.124787212 | 0.225315482 |
| D030028A08Rik 319371 | 1.141637662 | 0.358091205 | 1.696863396  | 0.043701708 |
| Polr2k 17749         | 1.141545389 | 0.367610833 | 1.141545389  | 0.367610833 |
| Pgk1 18655           | 1.141534555 | 0.046666514 | 1.141534555  | 0.046666514 |
| Pbx3 18516           | 1.141414281 | 0.343193161 | 1.142644292  | 0.231256067 |
| Bst2 69550           | 1.141382965 | 0.294360265 | -1.062380995 | 0.369845513 |
| Pelo 105083          | 1.14137083  | 0.242249534 | -1.080163319 | 0.284066555 |
| Ywhae 22627          | 1.141296555 | 0.066203511 | 1.137384019  | 0.025665964 |
| Sass6 72776          | 1.141255913 | 0.415858729 | 2.253962154  | 0.101904273 |
| Nemf 66244           | 1.141255484 | 0.315243511 | 1.509224741  | 0.04398915  |
| Ctgf 14219           | 1.141077995 | 0.29004417  | 1.39387828   | 0.057603552 |
| Mrp63 67840          | 1.141075686 | 0.199948929 | 1.137015464  | 0.126475126 |
| Ppia 268373          | 1.140993754 | 0.221290958 | 1.129926286  | 0.185050493 |
| Supt4h1 20922        | 1.140837164 | 0.155773604 | 1.140837164  | 0.155773604 |
| Chd1 12648           | 1.140725233 | 0.301850813 | 1.360284418  | 0.10977089  |
| Itga9 104099         | 1.140667979 | 0.254910015 | -1.047557847 | 0.325834542 |
| Eef1b2 55949         | 1.140552289 | 0.193650158 | 1.055271417  | 0.354762848 |
| Tars 110960          | 1.140511011 | 0.020965159 | 1.105248733  | 0.041607716 |
| Fbxw9 68628          | 1.140463    | 0.132033653 | 1.140463     | 0.132033653 |
| Enox 70252           | 1.140405521 | 0.372629303 | 1.140405521  | 0.372629303 |
| Ocln 18260           | 1.140356193 | 0.153074661 | 1.187029263  | 0.098600762 |
| Trmt1 212528         | 1.140300376 | 0.141910198 | 1.170676567  | 0.036936761 |
| Ilkap 67444          | 1.13983299  | 0.268555941 | -1.030048906 | 0.426798453 |
| Rpl27a 26451         | 1.139773225 | 0.259110267 | -1.001282127 | 0.497078481 |
| 4921530D09Rik 77058  | 1.139624595 | 0.434856741 | -1.591003234 | 0.290870527 |
| Dnajb9 27362         | 1.139597204 | 0.228418344 | 1.205750357  | 0.103702524 |
| Gtpbp6 107999        | 1.139578929 | 0.164063219 | 1.031325287  | 0.36226935  |
| Clec7a 56644         | 1.139478886 | 0.348724389 | 1.339368729  | 0.153620058 |

|                      |             |             |              |             |
|----------------------|-------------|-------------|--------------|-------------|
| 6330512M04Rik 320802 | 1.139394636 | 0.398028385 | 1.632142574  | 0.188564188 |
| Sugt1 67955          | 1.139247739 | 0.202636829 | 1.028694215  | 0.407181186 |
| Snrpd3 67332         | 1.139178828 | 0.149313849 | 1.223422969  | 0.031109717 |
| Tardbp 230908        | 1.138889692 | 0.119038136 | 1.138889692  | 0.119038136 |
| Hivep2 15273         | 1.138783108 | 0.346606718 | 1.380764204  | 0.179114075 |
| App 11820            | 1.138733101 | 0.267870133 | -1.119243958 | 0.211914655 |
| Nle1 217011          | 1.138688088 | 0.292228058 | -1.004682176 | 0.491789277 |
| Schip1 30953         | 1.138631011 | 0.431458821 | 1.366291578  | 0.378497556 |
| Utp18 217109         | 1.138627625 | 0.299988487 | 1.006445389  | 0.488353325 |
| Polr1c 20016         | 1.138580528 | 0.101815657 | 1.172917677  | 0.068703043 |
| Ptcd3 69956          | 1.138316728 | 0.130718032 | 1.138316728  | 0.130718032 |
| Zfp750 319530        | 1.137970336 | 0.206327181 | 1.258602275  | 0.028519318 |
| Tmem231 234740       | 1.137816447 | 0.434532488 | -3.010586893 | 0.023511985 |
| Myom3 242702         | 1.137688449 | 0.42284563  | -1.576144205 | 0.250276096 |
| Lpcat4 99010         | 1.137676271 | 0.281705407 | 1.255866405  | 0.135973942 |
| Slx4 52864           | 1.137594533 | 0.187585739 | 1.134455174  | 0.043340438 |
| Trmt61a 328162       | 1.137281611 | 0.179109476 | 1.326545761  | 0.010906753 |
| Zbtb32 58206         | 1.137165207 | 0.389523198 | 1.355646318  | 0.233074117 |
| Prkaa1 105787        | 1.137118469 | 0.328321559 | 1.311379102  | 0.193097228 |
| Manbal 69161         | 1.137107743 | 0.249398231 | 1.137107743  | 0.249398231 |
| Chchd1 66121         | 1.137095002 | 0.289441908 | 1.027307261  | 0.450521303 |
| Aldh1a3 56847        | 1.137082    | 0.437865718 | -1.085993843 | 0.458354237 |
| Ahctf1 226747        | 1.137044954 | 0.204775504 | 1.267302189  | 0.054047309 |
| 2010109K11Rik 72123  | 1.136970067 | 0.348497052 | 1.136970067  | 0.348497052 |
| Rbm17 76938          | 1.136969944 | 0.13061847  | 1.225274654  | 0.032078063 |
| Braf 109880          | 1.136965852 | 0.30561685  | 1.136965852  | 0.30561685  |
| Pea15a 18611         | 1.136835854 | 0.233647935 | 1.213269552  | 0.157376594 |
| Rbbp4 19646          | 1.136757484 | 0.018254595 | 1.064453107  | 0.038657409 |
| Ap2s1 232910         | 1.136639579 | 0.25279171  | -1.094515811 | 0.231073154 |
| Zfp513 101023        | 1.136471074 | 0.169839542 | 1.248833635  | 0.008378559 |
| Baat1 231841         | 1.136018631 | 0.194612994 | 1.136018631  | 0.194612994 |
| Tmed9 67511          | 1.135612491 | 0.196331105 | 1.274107861  | 0.0333333   |
| Rpl34 68436          | 1.13560286  | 0.277583029 | 1.00784323   | 0.484854092 |
| Ndufb3 66495         | 1.135488615 | 0.067447637 | 1.187771983  | 0.023654003 |
| 4833420G17Rik 67392  | 1.135469748 | 0.152051878 | 1.223613218  | 0.024275235 |
| Trub2 227682         | 1.135396426 | 0.215113652 | 1.025552301  | 0.427403852 |
| Pop4 66161           | 1.135094551 | 0.229193166 | 1.220289739  | 0.13915485  |
| Gpsm1 67839          | 1.135033291 | 0.382420295 | 1.135033291  | 0.382420295 |
| Serf2 378702         | 1.134925083 | 0.193981058 | -1.054821246 | 0.238697633 |
| Tsku 244152          | 1.134830149 | 0.269854534 | 1.018719169  | 0.463106146 |
| Nox4 50490           | 1.134803062 | 0.399742787 | 1.352691087  | 0.256582045 |
| Exosc2 227715        | 1.134761929 | 0.145002443 | 1.286434362  | 0.005283689 |
| lws1 73473           | 1.134750869 | 0.332461286 | 1.292600194  | 0.16535684  |
| Galnt10 171212       | 1.134723437 | 0.328721029 | -1.207999951 | 0.163658864 |
| Fmnl1 57778          | 1.134721658 | 0.362315921 | -1.188351331 | 0.273069579 |
| Coro1a 12721         | 1.13459522  | 0.330498831 | -1.236858558 | 0.126946476 |
| Ccni 12453           | 1.134571622 | 0.284148776 | 1.005553628  | 0.489638542 |
| Fxyd3 17178          | 1.134500912 | 0.414778359 | -1.093903908 | 0.433766023 |
| Gm10319 381806       | 1.134429553 | 0.395996908 | 1.134429553  | 0.395996908 |
| 2810001G20Rik 66456  | 1.134400018 | 0.349700474 | 1.134400018  | 0.349700474 |
| Bbs10 71769          | 1.13434921  | 0.387329329 | 1.13434921   | 0.387329329 |
| Mphosph10 67973      | 1.134020669 | 0.126801315 | 1.077765006  | 0.23371093  |
| Dstn 56431           | 1.133718428 | 0.128124527 | 1.091833631  | 0.139251205 |

|                      |             |             |              |             |
|----------------------|-------------|-------------|--------------|-------------|
| Eif1ax 66235         | 1.133711491 | 0.263197957 | 1.173678184  | 0.050474629 |
| Rybp 56353           | 1.13363513  | 0.305672015 | 1.376731671  | 0.080456687 |
| Kbtbd2 210973        | 1.13357922  | 0.293202097 | 1.13357922   | 0.293202097 |
| Pkn2 109333          | 1.133550085 | 0.344608774 | 1.026555923  | 0.449012605 |
| Rab17 19329          | 1.133489459 | 0.259939142 | 1.082164271  | 0.201085125 |
| Timm22 56322         | 1.133300377 | 0.177573046 | 1.062268697  | 0.314469406 |
| Pthr2 217057         | 1.133238285 | 0.274434874 | 1.133238285  | 0.274434874 |
| Ddx31 227674         | 1.133229372 | 0.281462625 | 1.043134144  | 0.426151837 |
| Aimp2 231872         | 1.133154626 | 0.186129161 | 1.04150057   | 0.362058559 |
| Lmbrd1 68421         | 1.132933647 | 0.135524893 | 1.201228215  | 0.010309917 |
| Ascc1 69090          | 1.132924717 | 0.331237825 | 1.130699502  | 0.304390108 |
| Aamp 227290          | 1.132771557 | 0.073514479 | 1.030448708  | 0.228217483 |
| Mapk8ip1 19099       | 1.132758356 | 0.259390071 | 1.190673277  | 0.138375942 |
| Usp37 319651         | 1.1326776   | 0.258876597 | 1.1326776    | 0.258876597 |
| Gcc2 70297           | 1.132589541 | 0.33928367  | 1.675189478  | 0.007733013 |
| Pop1 67724           | 1.132580746 | 0.302789179 | 1.053684205  | 0.4024549   |
| Scyl2 213326         | 1.132336793 | 0.352586588 | 1.724929901  | 0.013543739 |
| Eif1 20918           | 1.132261383 | 0.136836261 | 1.11872472   | 0.059133129 |
| Mycbp 56309          | 1.132126037 | 0.280565058 | -1.00377231  | 0.491303669 |
| Arl8a 68724          | 1.13211927  | 0.157929076 | 1.13211927   | 0.157929076 |
| Paip1 218693         | 1.132008919 | 0.271469799 | -1.05069694  | 0.356014088 |
| Ndufs3 68349         | 1.131913732 | 0.152764156 | 1.067929014  | 0.277898424 |
| Xpo7 65246           | 1.131889737 | 0.189046524 | 1.332823383  | 0.002526265 |
| Isy1 57905           | 1.131619868 | 0.113087708 | 1.157318321  | 0.091754731 |
| 2610034B18Rik 70420  | 1.131538246 | 0.192368774 | 1.025532747  | 0.409937697 |
| Apex1 11792          | 1.131510177 | 0.180613253 | 1.105652687  | 0.138621041 |
| Dhx9 13211           | 1.13146264  | 0.315904289 | -1.04510231  | 0.42503072  |
| Pik3ip1 216505       | 1.131360416 | 0.408329283 | 1.820585212  | 0.140133306 |
| Ddhd2 72108          | 1.131356235 | 0.247580194 | 1.220033334  | 0.027624213 |
| Fxr2 23879           | 1.131339461 | 0.127742847 | 1.179887352  | 0.064675842 |
| Slc43a3 58207        | 1.131272662 | 0.279551748 | 1.043583551  | 0.41791025  |
| Shoc2 56392          | 1.131255939 | 0.161072331 | 1.212455762  | 0.06366507  |
| 1700020O03Rik 70373  | 1.13100131  | 0.320573485 | 1.276307096  | 0.15333604  |
| Plcg2 234779         | 1.130967943 | 0.41268354  | 1.762413835  | 0.177476566 |
| Senp2 75826          | 1.130916548 | 0.183214106 | 1.216935388  | 0.079847042 |
| Slc25a15 18408       | 1.130800647 | 0.197282054 | 1.130800647  | 0.197282054 |
| 9530008L14Rik 109254 | 1.130793228 | 0.033980373 | 1.171260869  | 0.006057155 |
| Rasgrp1 19419        | 1.130785223 | 0.417799498 | 1.382707879  | 0.287824254 |
| Sec22a 317717        | 1.130732397 | 0.25026095  | 1.083161244  | 0.245731811 |
| Pkn3 263803          | 1.130710176 | 0.352001452 | 1.279311313  | 0.210354229 |
| Taf10 24075          | 1.130635234 | 0.191416885 | 1.130635234  | 0.191416885 |
| Psmc2 19181          | 1.130450208 | 0.154541414 | 1.297282532  | 0.004599688 |
| 2900064A13Rik 73024  | 1.130446857 | 0.054632528 | 1.171857246  | 0.023568047 |
| Agxt 11611           | 1.130439167 | 0.353129068 | -1.206270439 | 0.163383557 |
| Tom1 21968           | 1.130408406 | 0.249964031 | -1.09464345  | 0.166571757 |
| Gin1 252876          | 1.130404299 | 0.35308288  | -1.075445234 | 0.409636013 |
| Isg20 57444          | 1.130366171 | 0.3109783   | -1.011507207 | 0.464811901 |
| Rab33b 19338         | 1.130356415 | 0.255918756 | 1.063371648  | 0.3450662   |
| Trpt1 107328         | 1.130321287 | 0.270879082 | 1.24207204   | 0.059926649 |
| Pσμα2 19166          | 1.13019906  | 0.152305726 | -1.004910803 | 0.477307752 |
| Orai1 109305         | 1.130172643 | 0.302862329 | 1.050256033  | 0.352598907 |
| Kat5 81601           | 1.130167353 | 0.218732237 | 1.130167353  | 0.218732237 |
| Chmp7 105513         | 1.13014507  | 0.103526023 | 1.247546134  | 0.002643431 |



|                   |             |             |              |             |
|-------------------|-------------|-------------|--------------|-------------|
| Slc27a4 26569     | 1.1301229   | 0.095052187 | 1.208403487  | 0.012889648 |
| Gm16379 100040259 | 1.130115549 | 0.160693977 | 1.038876534  | 0.344439687 |
| Lym7 75530        | 1.129924834 | 0.289062559 | -1.06113203  | 0.344642346 |
| Snap23 20619      | 1.129699072 | 0.188044944 | 1.298697276  | 0.01679915  |
| Haus4 219072      | 1.129630135 | 0.191230672 | -1.022077352 | 0.417750454 |
| Rsph3b 100037282  | 1.129586656 | 0.288868752 | 1.084236263  | 0.298555753 |
| Ero1lb 67475      | 1.129551913 | 0.213788692 | 1.129551913  | 0.213788692 |
| Spast 50850       | 1.129519797 | 0.25558026  | 1.129519797  | 0.25558026  |
| Srp54b 665155     | 1.12920609  | 0.205148667 | 1.091824391  | 0.181486743 |
| Mapk8 26419       | 1.129164172 | 0.32023691  | -1.015122073 | 0.464977129 |
| Jmjd6 107817      | 1.129133132 | 0.146184829 | 1.048595646  | 0.30016699  |
| Mrpl24 67707      | 1.12911917  | 0.152902014 | 1.041519365  | 0.321832629 |
| Atp6v0e 11974     | 1.128981398 | 0.168659169 | 1.128981398  | 0.168659169 |
| Micalcl 100504195 | 1.128943925 | 0.39412171  | 1.445613809  | 0.232648402 |
| Atp6v0d1 11972    | 1.128878522 | 0.107804293 | 1.01941659   | 0.394057832 |
| Chd2 244059       | 1.128526764 | 0.316926909 | 1.011497587  | 0.482760409 |
| Rpl8 26961        | 1.128514613 | 0.293768941 | -1.035323551 | 0.426428457 |
| Anxa3 11745       | 1.128476551 | 0.343033323 | 1.579355375  | 0.040664712 |
| Eif4h 22384       | 1.128287379 | 0.052040467 | 1.180940503  | 0.004210742 |
| Abca6 76184       | 1.128277791 | 0.181956387 | 1.126500485  | 0.081656236 |
| Mafk 17135        | 1.128194351 | 0.176481673 | 1.227377517  | 0.051038731 |
| Rab2a 59021       | 1.128152921 | 0.036828917 | 1.095477126  | 0.075885566 |
| Pwp2 110816       | 1.12797424  | 0.246740558 | 1.01823287   | 0.41130735  |
| Rap1b 215449      | 1.127959354 | 0.298410619 | 1.127959354  | 0.298410619 |
| Acot12 74156      | 1.127953019 | 0.219238971 | 1.21794313   | 0.112743624 |
| Ttc35 66736       | 1.127934514 | 0.29276179  | 1.02079961   | 0.460012465 |
| Naa40 70999       | 1.127885547 | 0.283724049 | 1.303634778  | 0.09678833  |
| Impdh2 23918      | 1.127871259 | 0.275267934 | -1.133178768 | 0.11956072  |
| Trim3 55992       | 1.127778135 | 0.217424499 | 1.315658644  | 0.017158331 |
| AF251705 140497   | 1.127732188 | 0.373226109 | -1.163697053 | 0.327287398 |
| Atp8b2 54667      | 1.127725377 | 0.37282551  | 1.470824381  | 0.155181122 |
| Vdac3 22335       | 1.127694038 | 0.097062363 | 1.127694038  | 0.097062363 |
| Cxcl16 66102      | 1.127637845 | 0.306057524 | 1.275544137  | 0.165614541 |
| Rspry1 67610      | 1.12760233  | 0.332233783 | 1.128965973  | 0.305372746 |
| Tbpl1 237336      | 1.12758037  | 0.224108367 | 1.12758037   | 0.224108367 |
| Agmo 319660       | 1.127550712 | 0.298993849 | 1.127550712  | 0.298993849 |
| Iqcc 230767       | 1.127346943 | 0.350169816 | 1.127346943  | 0.350169816 |
| Slc15a4 100561    | 1.1273229   | 0.141578019 | 1.002403681  | 0.483833238 |
| Sepw1 20364       | 1.127322799 | 0.341468119 | 1.052445057  | 0.39527639  |
| Ndn12 66647       | 1.127263403 | 0.25989727  | 1.042447354  | 0.413616691 |
| Dhx33 216877      | 1.127229807 | 0.214505687 | 1.006956549  | 0.474781968 |
| Psm4 19185        | 1.127202226 | 0.19467804  | 1.183007454  | 0.117194886 |
| Lphn3 319387      | 1.127181484 | 0.439276142 | 1.264185714  | 0.40907038  |
| Samd14 217125     | 1.127145741 | 0.35555491  | 1.115705188  | 0.351482659 |
| Fbxo31 76454      | 1.127107811 | 0.167819826 | 1.044712415  | 0.33307028  |
| Hs1bp3 58240      | 1.127106239 | 0.217125382 | 1.127106239  | 0.217125382 |
| Usf2 22282        | 1.127055432 | 0.130235103 | 1.042053208  | 0.284019516 |
| Acot2 171210      | 1.126977944 | 0.281024259 | -1.130994779 | 0.167623956 |
| Frmd6 319710      | 1.126928465 | 0.38559891  | 1.600234848  | 0.120697043 |
| Fbxw2 30050       | 1.126906121 | 0.034477489 | 1.138397123  | 0.002141452 |
| Rab31 106572      | 1.126900757 | 0.366180208 | 1.126900757  | 0.366180208 |
| Tnks 21951        | 1.126850605 | 0.357204412 | 1.171926685  | 0.292126327 |
| Smchd1 74355      | 1.126769704 | 0.37758527  | 1.134260911  | 0.351395001 |

|                     |             |             |              |             |
|---------------------|-------------|-------------|--------------|-------------|
| Arpc1b 11867        | 1.126707304 | 0.241534803 | 1.018499786  | 0.452457497 |
| Vasn 246154         | 1.126673505 | 0.205314171 | 1.091373736  | 0.166918566 |
| Gde1 56209          | 1.126670784 | 0.131354162 | 1.051449647  | 0.272289563 |
| Mafg 17134          | 1.126648583 | 0.27035923  | -1.097138172 | 0.263977721 |
| Ngrn 83485          | 1.126616806 | 0.18617372  | -1.023915403 | 0.40554771  |
| Cnot6l 231464       | 1.126612428 | 0.323081628 | 1.120394382  | 0.318559183 |
| Fndc3b 72007        | 1.126558909 | 0.404232826 | 1.887919501  | 0.0780449   |
| Mthfr 17769         | 1.126554434 | 0.310055044 | 1.126554434  | 0.310055044 |
| Ppp2r2d 52432       | 1.126516068 | 0.221966551 | 1.013670023  | 0.457115156 |
| Ube2e2 218793       | 1.126511744 | 0.23747899  | 1.126511744  | 0.23747899  |
| Hddc2 69692         | 1.126476661 | 0.377366391 | 1.347415124  | 0.180170065 |
| Psm13 23997         | 1.12637904  | 0.192778476 | 1.12637904   | 0.192778476 |
| Hspe1 15528         | 1.126344568 | 0.084196427 | 1.064477405  | 0.173311522 |
| Cox7a2l 20463       | 1.126277324 | 0.236436385 | -1.012711504 | 0.454636332 |
| Atp5o 28080         | 1.125600851 | 0.255991862 | 1.031968981  | 0.429962476 |
| Tuba4a 22145        | 1.125555766 | 0.250311023 | 1.086542331  | 0.277659836 |
| Guca1b 107477       | 1.125447215 | 0.423080006 | 1.73392566   | 0.215742312 |
| Cdk10 234854        | 1.125330762 | 0.262296254 | 1.009005369  | 0.478988323 |
| Eapp 66266          | 1.125256015 | 0.299702658 | 1.357535852  | 0.058964696 |
| Pikfyve 18711       | 1.125224923 | 0.317701436 | 1.125224923  | 0.317701436 |
| Hpcal1 53602        | 1.125151473 | 0.196158081 | 1.125151473  | 0.196158081 |
| Ccdc28a 215814      | 1.125099099 | 0.247734087 | 1.368087338  | 0.011691535 |
| Cyr61 16007         | 1.125090783 | 0.339952673 | -1.293227369 | 0.014941387 |
| St6galnac3 20447    | 1.125067139 | 0.415426784 | 1.125067139  | 0.415426784 |
| Crip2 68337         | 1.125028469 | 0.154752341 | 1.125028469  | 0.154752341 |
| Blm 12144           | 1.124832446 | 0.400669909 | 1.639626697  | 0.153900282 |
| Atl2 56298          | 1.124580009 | 0.27288748  | 1.119462569  | 0.19600951  |
| Brp44l 55951        | 1.124530528 | 0.202003683 | 1.01652205   | 0.438332657 |
| Arl15 218639        | 1.124450833 | 0.363870125 | 1.002809207  | 0.496605638 |
| Gm5424 432466       | 1.124447973 | 0.096886941 | 1.07300761   | 0.191253667 |
| Dym 69190           | 1.124347814 | 0.207910665 | 1.049631278  | 0.364917036 |
| Kit 16590           | 1.124345268 | 0.360944178 | 1.709276021  | 0.006639052 |
| 2310039H08Rik 67101 | 1.124190911 | 0.239666556 | 1.244364941  | 0.047910727 |
| Atg4d 235040        | 1.12410999  | 0.208590939 | 1.039565974  | 0.385988293 |
| Nvl 67459           | 1.124105852 | 0.251885653 | 1.345124441  | 0.035405022 |
| Sema4c 20353        | 1.124099816 | 0.282873478 | 1.18252117   | 0.044674017 |
| D17Wsu92e 224647    | 1.124090428 | 0.040170743 | 1.168831064  | 0.009108722 |
| Fam105b 432940      | 1.124023293 | 0.225538847 | 1.046719931  | 0.376481402 |
| Prdx3 11757         | 1.124020898 | 0.210385835 | 1.277339128  | 0.023374027 |
| Ubl4 27643          | 1.123954699 | 0.123292611 | 1.0117767    | 0.437667716 |
| Actr10 56444        | 1.123887562 | 0.04024881  | 1.151052394  | 0.020933159 |
| Arhgap10 78514      | 1.123872558 | 0.31764132  | 1.262632556  | 0.145567062 |
| Htatsf1 72459       | 1.123871506 | 0.285949529 | 1.063082908  | 0.365691742 |
| Avpr1a 54140        | 1.12385988  | 0.188098404 | 1.029312907  | 0.386303504 |
| Tox 252838          | 1.123785428 | 0.367111013 | 1.390575844  | 0.181635837 |
| Usp38 74841         | 1.123701284 | 0.28556311  | -1.089221265 | 0.31042962  |
| Gars 353172         | 1.123695004 | 0.170394627 | 1.053596116  | 0.322761316 |
| Mfn1 67414          | 1.123681762 | 0.103600004 | 1.234251986  | 0.007203512 |
| Gtf2b 229906        | 1.12359977  | 0.326557667 | -1.032320139 | 0.440583913 |
| Vps8 209018         | 1.123504327 | 0.287838089 | 1.067782402  | 0.287196272 |
| Hsd17b11 114664     | 1.123476634 | 0.169064229 | 1.078662149  | 0.268540644 |
| Snx21 101113        | 1.12346875  | 0.266558556 | 1.295743301  | 0.062954804 |
| Hspd1 15510         | 1.123444355 | 0.194088438 | 1.132050637  | 0.125824777 |

|                      |             |             |              |             |
|----------------------|-------------|-------------|--------------|-------------|
| Cox11 69802          | 1.123345746 | 0.326099419 | 1.240406723  | 0.223942332 |
| Cep97 74201          | 1.123339303 | 0.315051786 | 1.206438429  | 0.159910425 |
| Osgep 66246          | 1.123226551 | 0.325887262 | -1.175021267 | 0.140960969 |
| Smagp 207818         | 1.123228758 | 0.203025227 | 1.150306933  | 0.095710491 |
| Naga 17939           | 1.123208852 | 0.265073791 | 1.097664113  | 0.220069494 |
| Hadhb 231086         | 1.123201248 | 0.127485916 | 1.085374575  | 0.146086021 |
| Rps20 67427          | 1.122856963 | 0.317413827 | -1.200904043 | 0.097621772 |
| Tspyl4 72480         | 1.122784242 | 0.402918408 | 1.122784242  | 0.402918408 |
| Fbxo32 67731         | 1.122735618 | 0.398775667 | 1.122735618  | 0.398775667 |
| Sfpq 71514           | 1.122590233 | 0.269387203 | 1.00453315   | 0.489546964 |
| Wdr12 57750          | 1.122583714 | 0.191797913 | 1.222334826  | 0.059108249 |
| Aacs 78894           | 1.122459437 | 0.25218221  | 1.122459437  | 0.25218221  |
| Csgalnact2 78752     | 1.122371844 | 0.410497785 | 1.331675987  | 0.247895672 |
| Mtttp 17777          | 1.122317225 | 0.186310296 | 1.122317225  | 0.186310296 |
| Gorab 98376          | 1.122236704 | 0.399060604 | -1.155352767 | 0.38056666  |
| Rpgrip1 77945        | 1.122115712 | 0.266602609 | 1.028975688  | 0.438539065 |
| Ebna1bp2 69072       | 1.122070197 | 0.174429979 | 1.122070197  | 0.174429979 |
| Pacs2 217893         | 1.121768422 | 0.310047451 | 1.121768422  | 0.310047451 |
| Ccl27a 20301         | 1.121754161 | 0.377451264 | 1.416634455  | 0.185718155 |
| Hoxb7 15415          | 1.121607891 | 0.424993464 | 1.577793729  | 0.260321642 |
| Ahcy 269378          | 1.121397458 | 0.183165645 | 1.044443693  | 0.352226223 |
| Msmpl 100039672      | 1.121348203 | 0.380079534 | 1.043357472  | 0.439073508 |
| Cct7 12468           | 1.121274422 | 0.130750211 | 1.121274422  | 0.130750211 |
| Parn 74108           | 1.121206693 | 0.173185496 | 1.289083596  | 0.005132453 |
| Azi2 27215           | 1.12116008  | 0.167419147 | 1.188227319  | 0.080933827 |
| Psma1 26440          | 1.121069361 | 0.211779132 | 1.079963544  | 0.302402263 |
| Arpc4 68089          | 1.121023205 | 0.270804065 | -1.015083124 | 0.461426035 |
| Grb10 14783          | 1.120843348 | 0.392875511 | 1.88970882   | 0.038412476 |
| 1110065P20Rik 68920  | 1.120840377 | 0.240374976 | 1.052724207  | 0.372818074 |
| Plg 18815            | 1.120805499 | 0.234588837 | -1.091186899 | 0.046241758 |
| Rps15 20054          | 1.120568444 | 0.356954548 | -1.132435868 | 0.316393068 |
| Abcc1 17250          | 1.120528292 | 0.411915146 | -1.062160652 | 0.450449683 |
| 2010016I18Rik 69206  | 1.120434388 | 0.439605144 | 2.617043494  | 0.129315134 |
| Prdx2 21672          | 1.120279702 | 0.234090047 | -1.001946053 | 0.493348415 |
| Med4 67381           | 1.120246197 | 0.250474216 | 1.00677349   | 0.481655694 |
| Kif3b 16569          | 1.120094525 | 0.253232674 | 1.342688548  | 0.028954104 |
| Dip2b 239667         | 1.12007934  | 0.307225196 | 1.022259975  | 0.462722336 |
| Prickle1 106042      | 1.120045863 | 0.328401967 | 1.342555914  | 0.117521122 |
| Myct1 68632          | 1.120010943 | 0.364673381 | 1.314094304  | 0.222526232 |
| Adam15 11490         | 1.119764232 | 0.319376267 | -1.102153985 | 0.262501137 |
| Timm17a 21854        | 1.11974161  | 0.262932221 | 1.214579022  | 0.152632781 |
| Fam81a 76886         | 1.119738351 | 0.369593556 | 1.452863561  | 0.131267206 |
| Nagk 56174           | 1.119716107 | 0.195629531 | 1.133005654  | 0.122695438 |
| 4930412F15Rik 242408 | 1.119592667 | 0.250954854 | -1.091553481 | 0.189306101 |
| G0s2 14373           | 1.119586107 | 0.348655589 | 1.119586107  | 0.348655589 |
| Pnpla3 116939        | 1.119507957 | 0.445737271 | 3.579326525  | 0.091893115 |
| Nol11 68979          | 1.11948959  | 0.297627243 | 1.331299583  | 0.062192149 |
| Mttr2 77116          | 1.119379175 | 0.338608391 | 1.011851938  | 0.477567804 |
| Tbl1xr1 81004        | 1.11937854  | 0.138251627 | 1.096170878  | 0.090496865 |
| Cd276 102657         | 1.119294762 | 0.408518471 | 2.286181103  | 0.004495831 |
| Ncapd3 78658         | 1.119264098 | 0.367736782 | -1.349397496 | 0.074693571 |
| Zbtb33 56805         | 1.119165167 | 0.399645383 | 2.103906183  | 0.00438707  |
| Ctns 83429           | 1.119137347 | 0.204610943 | 1.036972844  | 0.385283508 |

|                      |             |             |              |             |
|----------------------|-------------|-------------|--------------|-------------|
| Rpl22 19934          | 1.119110865 | 0.247978939 | -1.015411375 | 0.447896178 |
| Slc2a1 20525         | 1.119082622 | 0.30390884  | 1.035869276  | 0.395328644 |
| Rps27 57294          | 1.119060447 | 0.311040551 | -1.052897893 | 0.392509035 |
| Bad 12015            | 1.118918752 | 0.27940989  | -1.029676406 | 0.422627462 |
| Rragc 54170          | 1.118734581 | 0.112511213 | 1.017378603  | 0.401600656 |
| Ddx21 56200          | 1.118574801 | 0.226267122 | 1.025400072  | 0.420565479 |
| Bcl2l14 66813        | 1.118513314 | 0.422201218 | -1.338962617 | 0.313846823 |
| Orc6 56452           | 1.118404163 | 0.333340935 | -1.07228766  | 0.382604006 |
| Gm608 207806         | 1.118383699 | 0.28878112  | 1.1708916    | 0.22842387  |
| Pgp 67078            | 1.118243454 | 0.233964448 | 1.039661254  | 0.398641504 |
| Rnf34 80751          | 1.118207547 | 0.373267431 | -1.143480411 | 0.335881397 |
| Tspo 12257           | 1.118050089 | 0.183212981 | 1.052335486  | 0.332973026 |
| Gm5077 317677        | 1.118049184 | 0.423957991 | -1.618448589 | 0.16183379  |
| Stard3nl 76205       | 1.117825313 | 0.301538995 | 1.225361494  | 0.157183738 |
| Frg1 14300           | 1.117787005 | 0.238682914 | 1.019263421  | 0.446321757 |
| Psen2 19165          | 1.117738721 | 0.113849607 | 1.055192856  | 0.237408741 |
| Snx17 266781         | 1.117726314 | 0.140644404 | 1.194380791  | 0.036431885 |
| Ube2b 22210          | 1.117652196 | 0.129614987 | 1.087462109  | 0.078167177 |
| Mug1 17836           | 1.117620966 | 0.280179348 | 1.117620966  | 0.280179348 |
| 1110002N22Rik 68550  | 1.117508429 | 0.284603896 | 1.117508429  | 0.284603896 |
| Gart 14450           | 1.117459361 | 0.089957597 | 1.157538003  | 0.037711576 |
| Fam59a 381126        | 1.117364344 | 0.262585933 | 1.150251563  | 0.08024772  |
| Tspan5 56224         | 1.11728169  | 0.394744239 | 1.11728169   | 0.394744239 |
| Lias 79464           | 1.116998424 | 0.190651982 | -1.023243939 | 0.404806671 |
| B4galt4 56375        | 1.116657996 | 0.436295632 | 2.111254404  | 0.170969182 |
| Alas2 11656          | 1.116627271 | 0.347518366 | -1.07671342  | 0.387910117 |
| Mysm1 320713         | 1.116442483 | 0.251041472 | 1.116442483  | 0.251041472 |
| Hspa8 15481          | 1.116285431 | 0.263206719 | 1.116285431  | 0.263206719 |
| 6330549D23Rik 229613 | 1.116273293 | 0.378167839 | -1.154205059 | 0.329859314 |
| Tuba1b 22143         | 1.116217616 | 0.286363576 | 1.025391405  | 0.404966378 |
| Fam40a 229707        | 1.116149228 | 0.155408477 | 1.116149228  | 0.155408477 |
| Bbs1 52028           | 1.116062518 | 0.351482078 | 1.36362387   | 0.139292471 |
| Ccdc25 67179         | 1.116031925 | 0.205630213 | 1.281554432  | 0.020208186 |
| Slco1a4 28250        | 1.115989677 | 0.270258396 | 1.149381171  | 0.111316054 |
| Psph 100678          | 1.115858018 | 0.342847513 | 1.058102776  | 0.406316515 |
| 2410075B13Rik 223648 | 1.115650859 | 0.387097272 | -1.155675184 | 0.34804895  |
| Dis3l2 208718        | 1.115648282 | 0.186599413 | -1.020370945 | 0.412379223 |
| Dvl3 13544           | 1.115572925 | 0.323440355 | 1.115572925  | 0.323440355 |
| Bik 12124            | 1.115465594 | 0.315349184 | 1.250122381  | 0.13206427  |
| Egfl7 353156         | 1.115354783 | 0.210849052 | 1.024275631  | 0.418163534 |
| H2-D1 14964          | 1.115279008 | 0.08370237  | 1.14373648   | 0.052251163 |
| Fam195a 68241        | 1.11523235  | 0.174862143 | 1.169869475  | 0.086805188 |
| Arhgap18 73910       | 1.115104739 | 0.359943233 | 1.115104739  | 0.359943233 |
| Ifi271l 52668        | 1.115032652 | 0.309497583 | -1.035059837 | 0.42948865  |
| Zfp13 22654          | 1.114999905 | 0.321225769 | 1.354218962  | 0.069816053 |
| Ddx39 68278          | 1.114837619 | 0.154939717 | 1.044991965  | 0.314803552 |
| Stxbp3a 20912        | 1.114780926 | 0.328626588 | 1.251508524  | 0.153969018 |
| Tex10 269536         | 1.114774771 | 0.376983748 | 1.35050973   | 0.210628965 |
| Dynl1f 100040531     | 1.11472948  | 0.420408084 | -1.317860292 | 0.311196402 |
| Nkiras2 71966        | 1.114539216 | 0.208182502 | 1.114539216  | 0.208182502 |
| Pex19 19298          | 1.114454758 | 0.179664141 | 1.114454758  | 0.179664141 |
| Wdr41 218460         | 1.114451773 | 0.209259398 | 1.114451773  | 0.209259398 |
| Fermt2 218952        | 1.114343801 | 0.255466338 | 1.21905046   | 0.082421872 |

|                      |             |             |              |             |
|----------------------|-------------|-------------|--------------|-------------|
| Vkorc1 27973         | 1.114326089 | 0.296069268 | -1.038099467 | 0.409538045 |
| Gp9 54368            | 1.114277986 | 0.453634384 | -1.631371973 | 0.295028973 |
| Rps6 20104           | 1.114173639 | 0.266657404 | 1.009026986  | 0.477752604 |
| Ppp2cb 19053         | 1.114171567 | 0.175371322 | 1.114171567  | 0.175371322 |
| Tmem160 69094        | 1.114163259 | 0.348082978 | -1.11937974  | 0.301128474 |
| Rhog 56212           | 1.114042397 | 0.248051346 | -1.072988166 | 0.262373883 |
| Tsnax 53424          | 1.1140324   | 0.150401646 | 1.252835875  | 0.005500249 |
| Srp14 20813          | 1.114021567 | 0.219682017 | 1.207379773  | 0.089248871 |
| A730017L22Rik 613258 | 1.114015152 | 0.22223204  | 1.300130135  | 0.016412587 |
| Cdipt 52858          | 1.113942117 | 0.085624631 | 1.113942117  | 0.085624631 |
| C3ar1 12267          | 1.113937709 | 0.404661566 | 1.113937709  | 0.404661566 |
| Tmem179b 67706       | 1.113601304 | 0.230955892 | 1.217084403  | 0.087042649 |
| 2700078E11Rik 78832  | 1.113550619 | 0.064076085 | 1.113550619  | 0.064076085 |
| Rnf14 56736          | 1.113370898 | 0.210497712 | 1.256332714  | 0.010000732 |
| Hnrnpab 15384        | 1.113297047 | 0.141508401 | -1.007634329 | 0.448625931 |
| Rnf38 73469          | 1.113286736 | 0.312408653 | 1.339708392  | 0.059091975 |
| Hopx 74318           | 1.113259339 | 0.244710339 | 1.294826331  | 0.021627083 |
| Abhd8 64296          | 1.113216387 | 0.29153867  | 1.00422148   | 0.491139787 |
| Dmwd 13401           | 1.113165944 | 0.143968259 | 1.051572965  | 0.281114075 |
| Tlr4 21898           | 1.113146667 | 0.329843654 | 1.113146667  | 0.329843654 |
| Dynlr1b 67068        | 1.113136559 | 0.17596249  | 1.113136559  | 0.17596249  |
| Ubqln1 56085         | 1.113101122 | 0.120848356 | 1.123398994  | 0.038140885 |
| Sox18 20672          | 1.113020661 | 0.320090204 | 1.113020661  | 0.320090204 |
| 4732416N19Rik 320737 | 1.112908246 | 0.459065259 | 1            | #DIV/0!     |
| Serbp1 66870         | 1.112797178 | 0.04949704  | 1.112797178  | 0.04949704  |
| Riok2 67045          | 1.112738314 | 0.119439081 | 1.003316652  | 0.466348262 |
| C030044B11Rik 68128  | 1.112689096 | 0.331480769 | -1.089911959 | 0.323698684 |
| Mfsd3 69572          | 1.11266982  | 0.231144357 | 1.11266982   | 0.231144357 |
| Phax1 56698          | 1.112601183 | 0.25025659  | 1.111266186  | 0.197866713 |
| Zfp930 234358        | 1.112529386 | 0.396557643 | 1.566439308  | 0.128662737 |
| Tmem176b 65963       | 1.112472816 | 0.307782354 | -1.075231844 | 0.301676224 |
| Mtap7 17761          | 1.112444187 | 0.329940315 | 1.302889086  | 0.136418739 |
| Rps21 66481          | 1.112415744 | 0.334878377 | -1.222150605 | 0.071495105 |
| Snhg12 100039864     | 1.112406147 | 0.363619154 | -1.096180135 | 0.374759536 |
| Rpl24 68193          | 1.112328832 | 0.33814535  | 1.122425971  | 0.275730149 |
| Ptges2 96979         | 1.112320864 | 0.199455088 | 1.270154138  | 0.012067359 |
| D17H6S53E 114585     | 1.112295769 | 0.284332904 | 1.235719106  | 0.13357643  |
| Ndufs5 595136        | 1.112154691 | 0.2457132   | 1.040997218  | 0.318005002 |
| Mxd4 17122           | 1.112091232 | 0.139435787 | 1.009465181  | 0.44757809  |
| Mrpl33 66845         | 1.112003984 | 0.318195203 | 1.279192616  | 0.137570605 |
| Fbxl18 231863        | 1.111967297 | 0.37903123  | 1.047810246  | 0.426725503 |
| Timm8a1 30058        | 1.111870144 | 0.244679668 | -1.066381531 | 0.268663788 |
| Parvb 170736         | 1.111793898 | 0.282570035 | 1.013564124  | 0.470315749 |
| Cdc20 107995         | 1.111781863 | 0.424618059 | 1.697935956  | 0.194810627 |
| Sae1 56459           | 1.111719836 | 0.272720078 | -1.104182711 | 0.17204154  |
| 5033406O09Rik 77675  | 1.111698799 | 0.315417191 | 1.043782112  | 0.407899506 |
| Fkbp7 14231          | 1.11169118  | 0.420611024 | 1.11169118   | 0.420611024 |
| Hspb8 80888          | 1.111642831 | 0.208319557 | 1.006822391  | 0.470038964 |
| Armc10 67211         | 1.111547605 | 0.300094164 | 1.296857892  | 0.077816923 |
| Gimap6 231931        | 1.111532038 | 0.198229461 | 1.182020416  | 0.07446177  |
| Mrps33 14548         | 1.111467408 | 0.255757878 | 1.027543816  | 0.431644547 |
| 41157 18951          | 1.111460752 | 0.354699178 | 1.198983984  | 0.145100637 |
| lfrd1 15982          | 1.111440442 | 0.389704514 | -1.163753566 | 0.337600415 |

|                      |             |             |              |             |
|----------------------|-------------|-------------|--------------|-------------|
| Lnpep 240028         | 1.111372744 | 0.443757077 | 1.756849872  | 0.229137739 |
| Rc3h2 319817         | 1.111325098 | 0.318931643 | 1.439146289  | 0.004440595 |
| Sec23ip 207352       | 1.111280243 | 0.265215155 | 1.322451204  | 0.034145373 |
| Ercc2 13871          | 1.111189483 | 0.196088162 | 1.094532336  | 0.174687484 |
| Ywhaz 22631          | 1.111151948 | 0.102851489 | 1.06999992   | 0.194230109 |
| Spc25 66442          | 1.111050032 | 0.431829872 | 1.381064559  | 0.3272513   |
| Csf2rb2 12984        | 1.111038738 | 0.369577768 | 1.438080927  | 0.109069492 |
| Nudt16l1 66911       | 1.111026427 | 0.204231553 | 1.03250345   | 0.389789436 |
| Mrpl2 27398          | 1.110941254 | 0.280369017 | 1.110941254  | 0.280369017 |
| Chd1l 68058          | 1.110875851 | 0.319016132 | 1.051836516  | 0.414061508 |
| Hbp1 73389           | 1.110737222 | 0.15434808  | 1.031372773  | 0.338773118 |
| Fkbp1a 14225         | 1.110722167 | 0.083424829 | 1.110697497  | 0.118416443 |
| Rargl 19411          | 1.11069834  | 0.300871492 | 1.268064432  | 0.11336814  |
| Yap1 22601           | 1.110650847 | 0.184868977 | -1.024541349 | 0.376288184 |
| Gata4 14463          | 1.110523932 | 0.254498514 | 1.328072806  | 0.006060889 |
| Cox17 12856          | 1.110459779 | 0.269773809 | -1.006798861 | 0.481555411 |
| Diablo 66593         | 1.110442724 | 0.115482643 | 1.088168549  | 0.110231179 |
| Upf3a 67031          | 1.11032848  | 0.301243485 | 1.226192218  | 0.167765602 |
| Lonrf3 74365         | 1.110280287 | 0.308837084 | -1.021394559 | 0.450211712 |
| Eif2s3x 26905        | 1.110244226 | 0.161439981 | 1.110244226  | 0.161439981 |
| Cog3 338337          | 1.110218602 | 0.295369454 | 1.22738887   | 0.115495149 |
| Gpbp1l1 77110        | 1.110212835 | 0.247124148 | 1.110212835  | 0.247124148 |
| 5430435G22Rik 226421 | 1.11020524  | 0.363989091 | 1.409851382  | 0.111472716 |
| Avpi1 69534          | 1.110168754 | 0.251435241 | -1.009356237 | 0.468817417 |
| C330019G07Rik 215476 | 1.11011682  | 0.305173358 | 1.442592532  | 0.003741134 |
| Rps17 20068          | 1.110093438 | 0.315532532 | 1.107498923  | 0.222618544 |
| Gata6 14465          | 1.110035802 | 0.328466995 | -1.06662476  | 0.371760016 |
| lqcg 69707           | 1.110004634 | 0.272364279 | 1.00083027   | 0.497648125 |
| Tab2 68652           | 1.109934233 | 0.338260967 | 1.230233836  | 0.190205395 |
| Timm23 53600         | 1.109927272 | 0.088113515 | 1.058428815  | 0.181229465 |
| Cct6a 12466          | 1.109564903 | 0.213667858 | 1.150569345  | 0.094470799 |
| Tmsb10 19240         | 1.109420466 | 0.349264865 | -1.261972821 | 0.052146408 |
| Max 17187            | 1.10937131  | 0.14978965  | 1.099703302  | 0.077897626 |
| Cntrob 216846        | 1.10934553  | 0.323450634 | 1.11142978   | 0.2970781   |
| D030016E14Rik 320714 | 1.109282887 | 0.308752847 | 1.22959112   | 0.132381047 |
| Ctsc 13032           | 1.109164749 | 0.147231891 | 1.191452472  | 0.023970835 |
| Zc4h2 245522         | 1.10915968  | 0.445880011 | -1.85002843  | 0.229359943 |
| Mrpl17 27397         | 1.108999261 | 0.145266361 | 1.042031315  | 0.297809142 |
| Rab11a 53869         | 1.108981417 | 0.159976124 | 1.108981417  | 0.159976124 |
| Mcee 73724           | 1.108833856 | 0.157155781 | 1.168112336  | 0.07026117  |
| Snrpd2 107686        | 1.10866929  | 0.305191602 | 1.14196801   | 0.200276239 |
| Zfp809 235047        | 1.108584877 | 0.355771444 | -1.158297685 | 0.209459607 |
| Wipf1 215280         | 1.108406059 | 0.392973227 | 1.609669151  | 0.068368552 |
| Pdhx 27402           | 1.1083711   | 0.203229039 | 1.194534415  | 0.072212822 |
| 2810025M15Rik 69953  | 1.108352721 | 0.33881455  | -1.063705182 | 0.39047937  |
| Gm16516 24082        | 1.10834004  | 0.425707244 | 1.89636615   | 0.122370382 |
| Mbd5 109241          | 1.108314616 | 0.388015045 | 1.767515641  | 0.018534399 |
| Hdac4 208727         | 1.108309651 | 0.428018349 | 1.9456525    | 0.12235555  |
| Tacc2 57752          | 1.108279457 | 0.312163099 | 1.208697567  | 0.201849316 |
| Jph2 59091           | 1.10822303  | 0.461153577 | 1            | #DIV/0!     |
| 1700003F12Rik 75480  | 1.10822303  | 0.461153577 | 1            | #DIV/0!     |
| Ak7 78801            | 1.10822303  | 0.461153577 | 1            | #DIV/0!     |
| Adam22 11496         | 1.10822303  | 0.461153577 | 1            | #DIV/0!     |

|                     |             |             |              |             |
|---------------------|-------------|-------------|--------------|-------------|
| 4930579F01Rik 67741 | 1.10822303  | 0.461153577 | 1            | #DIV/0!     |
| Nup62cl 279706      | 1.10822303  | 0.461153577 | 1            | #DIV/0!     |
| Tor1a 30931         | 1.108127369 | 0.148245383 | 1.041320862  | 0.307922352 |
| 2610029G23Rik 67683 | 1.108050836 | 0.34711603  | 1.431286558  | 0.031502504 |
| Tnp02 212999        | 1.10796638  | 0.09879867  | 1.052159048  | 0.204989245 |
| Phtf1 18685         | 1.107955115 | 0.39889533  | -1.271399476 | 0.234119093 |
| Lmo4 16911          | 1.107900834 | 0.339495744 | 1.107900834  | 0.339495744 |
| Pfdn5 56612         | 1.10788102  | 0.32869675  | -1.038714855 | 0.430136312 |
| Mfng 17305          | 1.107870774 | 0.381319473 | 1.107870774  | 0.381319473 |
| Ankrd27 245886      | 1.107756515 | 0.277280937 | 1.107756515  | 0.277280937 |
| Etfb 110826         | 1.107735636 | 0.322015826 | -1.048044021 | 0.404180253 |
| Ier2 15936          | 1.10772134  | 0.376586887 | 1.008115766  | 0.487473412 |
| Slc45a3 212980      | 1.107654073 | 0.279148285 | 1.349513887  | 0.013853443 |
| Arpp19 59046        | 1.107618873 | 0.296635882 | -1.020910637 | 0.451275312 |
| Mob3b 214944        | 1.107554557 | 0.214659366 | 1.175473745  | 0.116752555 |
| Zfand6 65098        | 1.107505517 | 0.195827636 | 1.131366599  | 0.078886707 |
| Sfxn3 94280         | 1.107462234 | 0.396054633 | -1.345178719 | 0.088164404 |
| Ept1 28042          | 1.1073488   | 0.268430509 | 1.315642198  | 0.000983409 |
| Iitfg3 106581       | 1.107306423 | 0.203173814 | 1.056411244  | 0.330919451 |
| Tssc4 56844         | 1.107279678 | 0.30481233  | 1.107279678  | 0.30481233  |
| Pigl 327942         | 1.10725823  | 0.296301642 | 1.10725823   | 0.296301642 |
| Plekhh2 213556      | 1.107145396 | 0.438749971 | -1.500772018 | 0.285957398 |
| Lin52 217708        | 1.106912279 | 0.38589597  | -1.080458945 | 0.397336681 |
| Eif2s2 67204        | 1.106901677 | 0.096986609 | 1.074039599  | 0.179824239 |
| Spin1 20729         | 1.106854273 | 0.239222077 | 1.192590642  | 0.115839589 |
| C85492 215494       | 1.106822623 | 0.326436825 | 1.233523556  | 0.191066768 |
| Rsl1 380855         | 1.106698059 | 0.42549747  | 1.552196866  | 0.235488401 |
| Hars 15115          | 1.106636045 | 0.126911343 | 1.160735706  | 0.048299305 |
| Psm2 21762          | 1.106604503 | 0.032057165 | 1.106604503  | 0.032057165 |
| Rpl37 67281         | 1.106561698 | 0.331117759 | -1.196366831 | 0.10823891  |
| Fam164a 67306       | 1.106459271 | 0.430093501 | 1.886640467  | 0.145598876 |
| 1700017B05Rik 74211 | 1.106430539 | 0.324872161 | 1.273415389  | 0.138546103 |
| Tsr1 104662         | 1.106318966 | 0.318723165 | 1.106318966  | 0.318723165 |
| Lag3 16768          | 1.10631389  | 0.382416157 | 1.10631389   | 0.382416157 |
| Shprh 268281        | 1.106300208 | 0.370954237 | 1.402628545  | 0.123690386 |
| Hist1h4h 69386      | 1.106171388 | 0.450112259 | 1.752000096  | 0.288047588 |
| Stip1 20867         | 1.106131443 | 0.260001346 | 1.11268058   | 0.190229647 |
| Rab3gap1 226407     | 1.106096381 | 0.24110096  | 1.106096381  | 0.24110096  |
| Stx12 100226        | 1.106085038 | 0.314866774 | 1.106085038  | 0.314866774 |
| Rbm27 225432        | 1.105960569 | 0.348135152 | 1.484468311  | 0.03014541  |
| Mcm9 71567          | 1.105938731 | 0.410279998 | 1.042230547  | 0.462527448 |
| Foxj2 60611         | 1.105915149 | 0.340138681 | 1.326689381  | 0.109021461 |
| Creb3l1 26427       | 1.105826575 | 0.309263476 | 1.105826575  | 0.309263476 |
| Abca7 27403         | 1.105760304 | 0.269152982 | 1.191276434  | 0.155566237 |
| Bnip1 224630        | 1.105746757 | 0.216809934 | 1.11743185   | 0.137796962 |
| Toe1 68276          | 1.10566176  | 0.346153789 | 1.490338632  | 0.025188178 |
| Smad9 55994         | 1.105659015 | 0.389788719 | 1.519434448  | 0.099604753 |
| Ii17ra 16172        | 1.105644173 | 0.262628708 | 1.023495213  | 0.44045272  |
| Lmtk3 381983        | 1.105575539 | 0.443294088 | 2.332659533  | 0.138606261 |
| Ppp2r5c 26931       | 1.105400713 | 0.229366459 | 1.105400713  | 0.229366459 |
| Atp1b1 11931        | 1.10528435  | 0.264034929 | -1.050301723 | 0.356697458 |
| Tmtc3 237500        | 1.105273198 | 0.378175086 | 1.344634259  | 0.190342406 |
| Rpl17 319195        | 1.105212803 | 0.339760914 | -1.213809916 | 0.10125559  |

|                   |             |             |              |             |
|-------------------|-------------|-------------|--------------|-------------|
| Gemin5 216766     | 1.10499632  | 0.283018791 | 1.042077962  | 0.386522265 |
| Kazald1 107250    | 1.104964044 | 0.412757383 | 1.221074732  | 0.329994789 |
| Prorsd1 67939     | 1.104830815 | 0.278352573 | 1.104830815  | 0.278352573 |
| Zcchc9 69085      | 1.104734249 | 0.219245134 | 1.104734249  | 0.219245134 |
| Gm14005 100043424 | 1.104730097 | 0.420988366 | 1.104730097  | 0.420988366 |
| Lhfp 108927       | 1.104707917 | 0.3451109   | -1.010256819 | 0.475426806 |
| Rpl15 66480       | 1.104701041 | 0.232518581 | 1.025068367  | 0.422380345 |
| Ccdc101 75565     | 1.104697783 | 0.347351122 | 1.104697783  | 0.347351122 |
| B3gntl1 210004    | 1.104632801 | 0.387361841 | -1.336166911 | 0.14787827  |
| Prmt10 102182     | 1.104506325 | 0.356867498 | -1.069488431 | 0.397215205 |
| Higd2a 67044      | 1.104454529 | 0.204101451 | 1.252594547  | 0.019630776 |
| Mpnd 68047        | 1.104448947 | 0.281678605 | -1.034063051 | 0.394441764 |
| Cyp4f16 70101     | 1.104388978 | 0.343751079 | -1.102378366 | 0.302677481 |
| Ephx2 13850       | 1.10434538  | 0.203932119 | 1.021347798  | 0.415362395 |
| Bet1 54399        | 1.104318464 | 0.182970276 | 1.104318464  | 0.182970276 |
| Elp2 58523        | 1.104273246 | 0.183980061 | 1.104273246  | 0.183980061 |
| Uhmk1 16589       | 1.104242325 | 0.442297595 | -1.016937286 | 0.491400683 |
| D14Ert449e 66039  | 1.104178616 | 0.204019839 | 1.224258065  | 0.014247022 |
| Sdc4 20971        | 1.10388338  | 0.207575352 | 1.10388338   | 0.207575352 |
| Rad51l1 19363     | 1.103865246 | 0.354098368 | -1.097037384 | 0.341035662 |
| Gng10 14700       | 1.103710801 | 0.405191532 | 1.474043782  | 0.1833363   |
| Ppp3r1 19058      | 1.103681981 | 0.104908413 | 1.103681981  | 0.104908413 |
| Rnf114 81018      | 1.103635494 | 0.145343177 | 1.001651995  | 0.490551332 |
| Snora43 100306955 | 1.103507938 | 0.454669634 | 3.976520578  | 0.089749558 |
| Pecam1 18613      | 1.103405377 | 0.147688096 | 1.156663963  | 0.065876235 |
| Nsun5 100609      | 1.103304311 | 0.147732533 | 1.103840105  | 0.180193753 |
| Clybl 69634       | 1.103289491 | 0.200312541 | 1.190288046  | 0.058819294 |
| Pcgf5 76073       | 1.103232663 | 0.383032061 | 1.080553958  | 0.378077203 |
| Amdhd2 245847     | 1.103170968 | 0.31167376  | 1.058144125  | 0.323790353 |
| Kctd11 216858     | 1.103146432 | 0.394476925 | -1.008899635 | 0.48514357  |
| Psm6 26443        | 1.102993652 | 0.148059389 | 1.044874308  | 0.291050116 |
| Rrm2b 382985      | 1.102808145 | 0.436357954 | 1.111313646  | 0.42052129  |
| Rffl 67338        | 1.102737926 | 0.239353533 | 1.102737926  | 0.239353533 |
| Rnf145 74315      | 1.102712375 | 0.326977668 | 1.381560987  | 0.008031962 |
| Thrb 21834        | 1.102706034 | 0.330490784 | 1.447941129  | 0.011300893 |
| D11Wsu99e 28081   | 1.102686668 | 0.248163419 | 1.008432938  | 0.473306343 |
| Tmbim1 69660      | 1.102617442 | 0.103072648 | 1.102617442  | 0.103072648 |
| Zbtb20 56490      | 1.102515896 | 0.39987432  | 1.121626463  | 0.352992644 |
| Ncoa5 228869      | 1.102504067 | 0.174258205 | 1.043438007  | 0.323236153 |
| Rad18 58186       | 1.10242024  | 0.425220975 | 1.005423262  | 0.496162914 |
| Osbp1a 64291      | 1.102396854 | 0.259269947 | 1.102396854  | 0.259269947 |
| Mad2l1bp 66591    | 1.102389372 | 0.312271614 | 1.102389372  | 0.312271614 |
| Bhmt2 64918       | 1.102236286 | 0.245212385 | 1.216522994  | 0.023994075 |
| Lym1 73919        | 1.102181846 | 0.36840482  | -1.083996121 | 0.357661446 |
| Atp2a3 53313      | 1.102176128 | 0.350408673 | -1.026731708 | 0.459346407 |
| Tdrd7 100121      | 1.102038238 | 0.259739314 | 1.115477991  | 0.146100629 |
| Srcin1 56013      | 1.101852091 | 0.398088262 | 1.31590084   | 0.196662591 |
| Rps27l 67941      | 1.101777591 | 0.284126015 | 1.101777591  | 0.284126015 |
| Wdr45 54636       | 1.10162642  | 0.143499985 | 1.152013627  | 0.049997403 |
| Shroom2 110380    | 1.101561924 | 0.335200396 | 1.200616964  | 0.088502721 |
| Gpn2 100210       | 1.101463525 | 0.223506337 | 1.219785165  | 0.030405443 |
| Irf2 16363        | 1.101441558 | 0.23921039  | 1.211268409  | 0.06407405  |
| Gipc1 67903       | 1.101430406 | 0.224632709 | 1.137278522  | 0.105467466 |



|                  |             |             |              |             |
|------------------|-------------|-------------|--------------|-------------|
| Rfwd2 26374      | 1.101213529 | 0.273018408 | 1.103215119  | 0.163024006 |
| Oaz1 18245       | 1.101159311 | 0.280990155 | 1.07284229   | 0.264012062 |
| Fam71e1 75538    | 1.101022257 | 0.347089668 | 1.101022257  | 0.347089668 |
| Rpl11 67025      | 1.100840892 | 0.351992704 | -1.075389298 | 0.375063628 |
| Slc20a1 20515    | 1.100835527 | 0.224616823 | 1.142650777  | 0.083887681 |
| Msrb2 76467      | 1.100631976 | 0.218996276 | 1.154113457  | 0.123338481 |
| Sp3 20687        | 1.100627308 | 0.344304551 | -1.05793388  | 0.399046982 |
| Ndufa4l2 407790  | 1.100611451 | 0.426442481 | -1.072120647 | 0.423102978 |
| Pop5 117109      | 1.100583748 | 0.318434503 | -1.011709287 | 0.473824517 |
| Zfp622 52521     | 1.100484083 | 0.194686375 | 1.100484083  | 0.194686375 |
| Rmnd5a 68477     | 1.100326817 | 0.236868444 | 1.295949109  | 0.002311151 |
| Zmym5 219105     | 1.100208827 | 0.278939161 | 1.112814767  | 0.168590973 |
| Setdb1 84505     | 1.100198468 | 0.309057068 | 1.361263979  | 0.030758345 |
| Smyd5 232187     | 1.100143779 | 0.134708014 | 1.072867818  | 0.042728779 |
| Exosc6 72544     | 1.100135003 | 0.34474886  | 1.100135003  | 0.34474886  |
| Ifi205 226695    | 1.09998942  | 0.446630311 | 1.09998942   | 0.446630311 |
| Zfp428 232969    | 1.099908918 | 0.385805846 | -1.174224288 | 0.282660173 |
| Utp15 105372     | 1.099842052 | 0.321219358 | 1.058811756  | 0.304960224 |
| Pdzk1ip1 67182   | 1.099841188 | 0.341650858 | 1.099841188  | 0.341650858 |
| Spint2 20733     | 1.099797553 | 0.231200916 | -1.042593418 | 0.337333608 |
| Mtmr1 53332      | 1.099790483 | 0.334100003 | 1.226614915  | 0.192132605 |
| Mif4gd 69674     | 1.099748217 | 0.251831934 | 1.002566823  | 0.491499777 |
| Rrp15 67223      | 1.099741817 | 0.290817921 | -1.087712155 | 0.264919104 |
| Ndr1 17988       | 1.09966836  | 0.309974328 | 1.1928478    | 0.195447882 |
| Gpr30 76854      | 1.099662837 | 0.436994614 | 1.099662837  | 0.436994614 |
| Mtdh 67154       | 1.09962478  | 0.36018058  | 1.09962478   | 0.36018058  |
| Ndufb5 66046     | 1.099498517 | 0.221664002 | -1.045441822 | 0.300370355 |
| Tmem69 230657    | 1.099456461 | 0.195475365 | 1.019666599  | 0.406341625 |
| Odc1 18263       | 1.099259225 | 0.183126375 | 1.099259225  | 0.183126375 |
| Kbtbd7 211255    | 1.099111359 | 0.351499176 | 1.333578223  | 0.10174052  |
| Ogfr 72075       | 1.099043727 | 0.250306956 | 1.150951601  | 0.163779882 |
| Dip2c 208440     | 1.098969187 | 0.356105883 | 1.098969187  | 0.356105883 |
| Pdgfrl 68797     | 1.098964022 | 0.434375662 | 1.162218389  | 0.407080954 |
| Bag3 29810       | 1.098686929 | 0.254855416 | 1.038907711  | 0.392479289 |
| D4Bwg0951e 52829 | 1.098649549 | 0.121120235 | 1.005221335  | 0.460829289 |
| Rab9 56382       | 1.09853215  | 0.16328893  | 1.09853215   | 0.16328893  |
| Selk 80795       | 1.09845338  | 0.217527483 | -1.032632913 | 0.359510377 |
| Ahsa1 217737     | 1.098444677 | 0.137184245 | 1.09608058   | 0.164717935 |
| Rpl34-ps1 619547 | 1.098442499 | 0.428043681 | -1.339851816 | 0.160150656 |
| Stat5b 20851     | 1.098391503 | 0.267269319 | 1.255299663  | 0.023815405 |
| Psm6 19175       | 1.098306983 | 0.22561424  | 1.038500292  | 0.379614887 |
| Cyb561d2 56368   | 1.098282814 | 0.183984418 | -1.017648284 | 0.408067406 |
| Keg1 64697       | 1.098269554 | 0.287278911 | 1.098269554  | 0.287278911 |
| Idh2 269951      | 1.098198704 | 0.133156997 | 1.009831228  | 0.412668566 |
| Slc35a2 22232    | 1.098162305 | 0.201199679 | -1.04182226  | 0.256887945 |
| Srpx2 68792      | 1.098147993 | 0.386944891 | 1.169916978  | 0.248348775 |
| Poc1a 70235      | 1.098090041 | 0.384273805 | 1.338528924  | 0.174277393 |
| Ndufa3 66091     | 1.098072102 | 0.276611335 | 1.014717837  | 0.462192565 |
| Lyar 17089       | 1.097912233 | 0.288548839 | 1.202704789  | 0.101736007 |
| Cyba 13057       | 1.097827575 | 0.325436758 | -1.071915322 | 0.325307737 |
| Med29 67224      | 1.097811367 | 0.296922359 | 1.157527537  | 0.208140377 |
| Glt25d1 234407   | 1.097801579 | 0.257119919 | 1.097801579  | 0.257119919 |
| Zc3h15 69082     | 1.097687649 | 0.309909161 | 1.091031779  | 0.253393438 |

|                     |             |             |              |             |
|---------------------|-------------|-------------|--------------|-------------|
| Klhl21 242785       | 1.097639016 | 0.31839421  | 1.287234306  | 0.068942412 |
| Zdhhc12 66220       | 1.097617392 | 0.196853045 | 1.06880236   | 0.16337232  |
| S100a10 20194       | 1.097562521 | 0.303456578 | 1.097562521  | 0.303456578 |
| Sat1 20229          | 1.097545188 | 0.216853549 | 1.07983925   | 0.151149922 |
| Rpl28 19943         | 1.097463906 | 0.347517863 | -1.106302754 | 0.281117063 |
| Hltf 20585          | 1.097429091 | 0.349552428 | 1.12050628   | 0.228296663 |
| Hnrnp1 15388        | 1.097268432 | 0.211221084 | -1.038190085 | 0.304500587 |
| Fam160a1 229488     | 1.097231473 | 0.343569824 | 1.17198671   | 0.267361261 |
| Irf2bp2 270110      | 1.09690605  | 0.221946359 | 1.168983812  | 0.076438275 |
| Foxp1 108655        | 1.096902468 | 0.28977675  | 1.096902468  | 0.28977675  |
| Rpl26 19941         | 1.096847187 | 0.296701674 | 1.029052211  | 0.437358277 |
| Runx1t1 12395       | 1.096807203 | 0.452865627 | -2.497414141 | 0.097650894 |
| Trim33 94093        | 1.096772475 | 0.411921141 | 1.586979468  | 0.118518349 |
| Prpsap1 67763       | 1.09669427  | 0.179476635 | 1.149240001  | 0.04320726  |
| Ngly1 59007         | 1.096493888 | 0.354408888 | -1.02006055  | 0.465179321 |
| Smo 319757          | 1.096322757 | 0.277703331 | -1.004372737 | 0.48612605  |
| Calr3 73316         | 1.096182829 | 0.382139373 | -1.197886736 | 0.201896338 |
| Nmb 68039           | 1.095997167 | 0.45353772  | 1.195314368  | 0.428478238 |
| Rab71l 226422       | 1.095925482 | 0.267738784 | 1.224088392  | 0.0615747   |
| Taf1c 21341         | 1.09590417  | 0.348580503 | 1.09590417   | 0.348580503 |
| Pck1 18534          | 1.095871157 | 0.154745267 | 1.029428474  | 0.333965255 |
| Ube2v2 70620        | 1.095806412 | 0.368439016 | 1.23012265   | 0.126649667 |
| Mbd2 17191          | 1.095522428 | 0.270472559 | 1.20368302   | 0.099989684 |
| Atg4a 666468        | 1.095431575 | 0.395412342 | 1.095431575  | 0.395412342 |
| Gss 14854           | 1.095399591 | 0.254379992 | 1.022531042  | 0.429598782 |
| Gpatch3 242691      | 1.09538786  | 0.33959274  | 1.09538786   | 0.33959274  |
| Kcmf1 74287         | 1.095292084 | 0.171038006 | 1.033932038  | 0.342469783 |
| Clpp 53895          | 1.095245458 | 0.261988598 | 1.151025718  | 0.165626989 |
| Cul3 26554          | 1.095239407 | 0.291061521 | 1.19904249   | 0.140460435 |
| Synj1 104015        | 1.095220172 | 0.349138125 | -1.01683975  | 0.459077209 |
| Mta2 23942          | 1.095212225 | 0.147742448 | 1.050313975  | 0.275945749 |
| Exosc4 109075       | 1.095151005 | 0.210353183 | 1.026242361  | 0.393830438 |
| Hint2 68917         | 1.095148608 | 0.302271916 | -1.03363461  | 0.408800587 |
| Grm8 14823          | 1.095055814 | 0.465706597 | 1            | #DIV/0!     |
| Hist3h2ba 78303     | 1.095055814 | 0.465706597 | 1            | #DIV/0!     |
| Dcn 13179           | 1.095004333 | 0.314227215 | 1.125095677  | 0.188459893 |
| Ncoa3 17979         | 1.094910829 | 0.307368128 | -1.022401996 | 0.445455754 |
| Atxn3 110616        | 1.0949006   | 0.311691716 | -1.001780194 | 0.49611231  |
| Pigm 67556          | 1.094864622 | 0.390685979 | 1.289684368  | 0.236098186 |
| 1810022K09Rik 69126 | 1.094793135 | 0.376976602 | 1.311598355  | 0.095080912 |
| Zbtb24 268294       | 1.09478433  | 0.248333718 | 1.177887818  | 0.111685232 |
| Mrpl9 78523         | 1.094772342 | 0.129683132 | 1.062020555  | 0.228460554 |
| Ybey 216119         | 1.094761038 | 0.328235204 | 1.194342346  | 0.208204152 |
| Slc39a9 328133      | 1.094712159 | 0.320824718 | 1.410275386  | 0.001788397 |
| Bop1 12181          | 1.094576476 | 0.230986758 | 1.094576476  | 0.230986758 |
| Fcgr2b 14130        | 1.094535836 | 0.324657802 | 1.022808319  | 0.454810755 |
| Nat2 17961          | 1.094496255 | 0.350811059 | 1.230081055  | 0.203391653 |
| Adamtsl2 77794      | 1.094461526 | 0.325905706 | 1.26015174   | 0.109648391 |
| Pcna 18538          | 1.094411825 | 0.192080869 | 1.238843314  | 0.001174608 |
| Pfkfb1 18639        | 1.094170092 | 0.335743927 | 1.22730503   | 0.128036507 |
| Sycp3 20962         | 1.094068721 | 0.367885571 | 1.307764588  | 0.064719865 |
| Btg1 12226          | 1.094007317 | 0.263083665 | 1.174547111  | 0.107449447 |
| Yipf2 74766         | 1.093905776 | 0.318477089 | -1.027222525 | 0.438588121 |

|                     |             |             |              |             |
|---------------------|-------------|-------------|--------------|-------------|
| Nceh1 320024        | 1.093758454 | 0.370198281 | 1.18724982   | 0.284306191 |
| Cbfb 12400          | 1.093678919 | 0.370990009 | 1.482770955  | 0.035554301 |
| Bag5 70369          | 1.093456856 | 0.279283006 | 1.138106744  | 0.105369104 |
| Uqcrb 67530         | 1.093452193 | 0.253178446 | 1.025073031  | 0.421089576 |
| Gemin7 69731        | 1.093392287 | 0.284294304 | -1.023612573 | 0.425132522 |
| Cep63 28135         | 1.093300822 | 0.269499015 | -1.00891431  | 0.470572641 |
| Gnb1 13972          | 1.093269048 | 0.317683584 | -1.015206686 | 0.462629997 |
| E2f1 13555          | 1.093256312 | 0.308247422 | 1.251617925  | 0.078314821 |
| Prhoxnb 231903      | 1.093244698 | 0.339331913 | 1.403246991  | 0.012677972 |
| Rpia 19895          | 1.093141028 | 0.376574801 | 1.093141028  | 0.376574801 |
| Ddx42 72047         | 1.093128347 | 0.263673661 | 1.087348434  | 0.141603135 |
| Tspan12 269831      | 1.093093278 | 0.320769091 | 1.117573978  | 0.253526188 |
| Chmp4b 75608        | 1.093069229 | 0.140499065 | 1.008161367  | 0.445781133 |
| Rpl7l1 66229        | 1.093037296 | 0.190675431 | -1.025964142 | 0.352798147 |
| Gm6900 628596       | 1.09302935  | 0.289516648 | 1.319034153  | 0.013944165 |
| Smyd1 12180         | 1.092956764 | 0.348767726 | -1.056415523 | 0.397502117 |
| Zbtb40 230848       | 1.092867149 | 0.351550544 | 1.211350948  | 0.222166299 |
| Tspan3 56434        | 1.092782742 | 0.333959528 | 1.092782742  | 0.333959528 |
| Kynu 70789          | 1.092759295 | 0.243544565 | 1.163766057  | 0.02394275  |
| Nmd3 97112          | 1.092704578 | 0.327279249 | -1.169729457 | 0.081133644 |
| Plin3 66905         | 1.092689927 | 0.178863929 | 1.092689927  | 0.178863929 |
| Abcb7 11306         | 1.092563821 | 0.346424794 | 1.310531343  | 0.083086586 |
| Ube2f 67921         | 1.092500248 | 0.209126638 | 1.013987153  | 0.436078895 |
| Nudt15 214254       | 1.092384738 | 0.444308127 | 1.799787385  | 0.205334449 |
| Gas5 14455          | 1.092370894 | 0.302998371 | 1.132966742  | 0.153965801 |
| Ythdc2 240255       | 1.092301287 | 0.391662196 | 1.581170321  | 0.027592626 |
| Cdk2ap1 13445       | 1.092275735 | 0.194230503 | 1.163341032  | 0.062706872 |
| Krt10 16661         | 1.092220426 | 0.399241219 | 1.45260338   | 0.12408355  |
| Usf1 22278          | 1.092207626 | 0.323323429 | -1.05040351  | 0.378187146 |
| Mxd3 17121          | 1.092196453 | 0.419432893 | 1.092196453  | 0.419432893 |
| Capza1 12340        | 1.092194534 | 0.301040867 | -1.016460804 | 0.45722112  |
| Kif24 109242        | 1.09217231  | 0.334577555 | -1.044324615 | 0.408087654 |
| Polr3gl 69870       | 1.092134011 | 0.215600773 | 1.165773157  | 0.082361784 |
| Vps37b 330192       | 1.092131663 | 0.192744084 | 1.092131663  | 0.192744084 |
| Bicap 53619         | 1.092102584 | 0.255941621 | 1.092102584  | 0.255941621 |
| Prmt1 15469         | 1.092050349 | 0.263531596 | -1.004190525 | 0.484251024 |
| Irgq 210146         | 1.092031253 | 0.322645539 | 1.163015354  | 0.133600894 |
| Ddb1 13194          | 1.091953949 | 0.195567079 | 1.036792034  | 0.354674931 |
| Ppargc1b 170826     | 1.091858916 | 0.397147493 | -1.094904744 | 0.397484019 |
| Adra2b 11552        | 1.091836215 | 0.243125228 | 1.024962849  | 0.41512615  |
| Tpm1 22003          | 1.091802691 | 0.239676029 | 1.064836261  | 0.174222602 |
| Tlk2 24086          | 1.091744525 | 0.30195655  | 1.091744525  | 0.30195655  |
| Slc12a3 20497       | 1.091667256 | 0.465581866 | -2.76078     | 0.173296754 |
| Alg9 102580         | 1.091584977 | 0.273141434 | 1.155982611  | 0.156058519 |
| Fam3c 27999         | 1.09148403  | 0.195725452 | 1.09148403   | 0.195725452 |
| 2310030N02Rik 76947 | 1.091474977 | 0.351748381 | -1.014866464 | 0.472540488 |
| Prkar1a 19084       | 1.091351278 | 0.096150869 | 1.10407485   | 0.02946061  |
| Srgap2 14270        | 1.091061109 | 0.332076103 | 1.183610772  | 0.042014407 |
| Tns1 21961          | 1.090864537 | 0.328369796 | 1.077425487  | 0.324624723 |
| Phyh 16922          | 1.090863153 | 0.316494013 | 1.090863153  | 0.316494013 |
| Mmrn2 105450        | 1.0907973   | 0.296925061 | 1.0907973    | 0.296925061 |
| Phf17 269424        | 1.090759689 | 0.360203153 | 1.457026596  | 0.020905107 |
| Atp6v0c 11984       | 1.090594174 | 0.077943265 | 1.029317314  | 0.268754034 |

|                      |             |             |              |             |
|----------------------|-------------|-------------|--------------|-------------|
| Hoxb4 15412          | 1.090431888 | 0.355456695 | 1.218927361  | 0.151802023 |
| Nras 18176           | 1.090328927 | 0.217790158 | 1.069121679  | 0.290437407 |
| Ctsz 64138           | 1.090308772 | 0.324966037 | -1.027375703 | 0.439375979 |
| Ncbp1 433702         | 1.090249821 | 0.306648343 | -1.026298038 | 0.420550798 |
| 1700012B15Rik 74173  | 1.090152123 | 0.357460475 | 1.221623761  | 0.212833569 |
| Nrf1 18181           | 1.090082815 | 0.208845654 | 1.119768223  | 0.098576514 |
| Tmed1 17083          | 1.090043833 | 0.327054351 | -1.022827062 | 0.45098957  |
| Mrpl55 67212         | 1.089692534 | 0.322493165 | 1.225564136  | 0.132835163 |
| Klhl36 234796        | 1.089688728 | 0.378098017 | 1.204890511  | 0.270860903 |
| Wdr83 67836          | 1.089677819 | 0.253631909 | -1.060541212 | 0.254263001 |
| Ddr2 18214           | 1.08961365  | 0.429089839 | 1.630074019  | 0.158168861 |
| Mcm3 17215           | 1.089581305 | 0.368946301 | 1.004879473  | 0.492461106 |
| Cblc 80794           | 1.089524255 | 0.365009999 | 1.135691867  | 0.257372146 |
| Osbp 76303           | 1.089499134 | 0.324505178 | 1.132007604  | 0.219152203 |
| Rnf113a2 66381       | 1.089442827 | 0.283376739 | -1.006015037 | 0.482072889 |
| Gramd4 223752        | 1.089402417 | 0.392707335 | 1.179769075  | 0.273507839 |
| Adcy9 11515          | 1.089358926 | 0.386152354 | 1.308617865  | 0.18798668  |
| Il21r 60504          | 1.089345025 | 0.425367039 | 1.444684304  | 0.229385645 |
| Btrc 12234           | 1.08932917  | 0.107356971 | 1.169704611  | 0.006335788 |
| Kctd10 330171        | 1.089286801 | 0.359402413 | -1.046791017 | 0.422289807 |
| Ckap5 75786          | 1.089238517 | 0.338630811 | 1.003212454  | 0.493546911 |
| Banf1 23825          | 1.08918415  | 0.204643201 | 1.135329011  | 0.109641888 |
| Tinf2 28113          | 1.089100306 | 0.301263921 | -1.004497421 | 0.488509826 |
| Pkmyt1 268930        | 1.089054974 | 0.365231051 | 1.458088699  | 0.001787659 |
| Lrrc58 320184        | 1.08902468  | 0.342765035 | 1.15682691   | 0.163887159 |
| Tsga14 83922         | 1.089021044 | 0.421494393 | 1.046616044  | 0.457406848 |
| Fam160b2 239170      | 1.088991948 | 0.202199688 | 1.094816415  | 0.079255318 |
| Inpp5a 212111        | 1.088988846 | 0.24376681  | 1.16815238   | 0.101338891 |
| Tmem100 67888        | 1.088965036 | 0.44805352  | -1.659929646 | 0.223458614 |
| Slc27a2 26458        | 1.088930672 | 0.318026979 | 1.088930672  | 0.318026979 |
| AA543186 100272219   | 1.088846188 | 0.438993673 | -1.305757248 | 0.32891176  |
| Mlxip 208104         | 1.088836827 | 0.345625853 | -1.020757357 | 0.430487587 |
| Mrps18b 66973        | 1.088756968 | 0.221142031 | 1.130828588  | 0.139349485 |
| Ifnar1 15975         | 1.088723311 | 0.13102851  | 1.117679583  | 0.08635332  |
| Ing2 69260           | 1.08861323  | 0.284785894 | 1.012927891  | 0.462801905 |
| Zdhhc21 68268        | 1.088612555 | 0.394460412 | 1.379758158  | 0.147306926 |
| H2-T23 15040         | 1.088606831 | 0.11206042  | 1.053421919  | 0.215555661 |
| Entpd7 93685         | 1.088562239 | 0.398282965 | 1.269579058  | 0.253504379 |
| Cyld 74256           | 1.088535658 | 0.31599356  | 1.081886449  | 0.314690046 |
| Rhod 11854           | 1.088506389 | 0.349515882 | -1.100594752 | 0.271472446 |
| Tfpi 21788           | 1.088489503 | 0.427415995 | 1.088489503  | 0.427415995 |
| Tnks2 74493          | 1.088382009 | 0.278063369 | 1.183123161  | 0.083093383 |
| 3110043O21Rik 73205  | 1.088325633 | 0.348784137 | -1.069840691 | 0.359163744 |
| Cdc42ep4 56699       | 1.088282912 | 0.190778983 | 1.143457455  | 0.067680361 |
| Foxa3 15377          | 1.088237091 | 0.146902994 | 1.0361787    | 0.300157856 |
| Wsb2 59043           | 1.088199223 | 0.244824513 | 1.022994392  | 0.419027123 |
| 0610012G03Rik 106264 | 1.088185557 | 0.220253272 | 1.100983238  | 0.111268008 |
| Cd207 246278         | 1.088067147 | 0.406653871 | 1.213186314  | 0.275999454 |
| Srcrb4d 109267       | 1.088020375 | 0.420701448 | -1.329379391 | 0.21094128  |
| N4bp3 212706         | 1.08801525  | 0.39447829  | -1.195011459 | 0.237959169 |
| BC024659 108934      | 1.087917344 | 0.325763177 | 1.087917344  | 0.325763177 |
| Capzb 12345          | 1.08787271  | 0.288289968 | -1.001967154 | 0.494393898 |
| Myl6 17904           | 1.087779611 | 0.306376304 | -1.02903158  | 0.419201553 |

|                     |             |             |              |             |
|---------------------|-------------|-------------|--------------|-------------|
| Selm 114679         | 1.087751551 | 0.414790913 | -1.267420178 | 0.242194199 |
| Pan2 103135         | 1.087742095 | 0.273068779 | 1.18488642   | 0.053824829 |
| Fermt1 241639       | 1.087740168 | 0.377860053 | 1.213706717  | 0.224082538 |
| 3110003A17Rik 73112 | 1.08771878  | 0.225757772 | 1.170634754  | 0.066268703 |
| Zwint 52696         | 1.087676627 | 0.218276997 | 1.227244513  | 0.00788407  |
| Aldh16a1 69748      | 1.087665599 | 0.244483114 | 1.087665599  | 0.244483114 |
| Zfp110 65020        | 1.087596924 | 0.29670025  | 1.087596924  | 0.29670025  |
| Cxcl13 55985        | 1.087589551 | 0.4218921   | -1.194198578 | 0.343543363 |
| Gm2002 100038993    | 1.087550437 | 0.449613211 | 1.899849747  | 0.087408186 |
| Anp32a 11737        | 1.087542917 | 0.251211884 | 1.087542917  | 0.251211884 |
| Suz12 52615         | 1.087527007 | 0.348128338 | 1.070208491  | 0.316495787 |
| Fxyd1 56188         | 1.08751198  | 0.375295144 | 1.060021079  | 0.365348006 |
| Slc25a39 68066      | 1.087439679 | 0.138122008 | 1.06069043   | 0.229787144 |
| Fam160a2 74349      | 1.087416084 | 0.266290302 | 1.27105821   | 0.012066784 |
| Ttc7b 104718        | 1.087396907 | 0.298618742 | 1.013841221  | 0.465900838 |
| Snx27 76742         | 1.087321874 | 0.330163774 | 1.087321874  | 0.330163774 |
| Atrip 235610        | 1.087298744 | 0.32511655  | 1.171300699  | 0.212923415 |
| Irak2 108960        | 1.087165638 | 0.214343717 | 1.019631853  | 0.41596332  |
| Tmem30a 69981       | 1.0871216   | 0.319286813 | 1.114436818  | 0.139999244 |
| Kcnk3 16527         | 1.087103107 | 0.417280107 | 1.376563963  | 0.229468232 |
| Tap2 21355          | 1.087050966 | 0.196499732 | 1.087050966  | 0.196499732 |
| Papln 170721        | 1.087002673 | 0.425945843 | -1.056558218 | 0.452059344 |
| Cwf19l2 244672      | 1.08697524  | 0.427449613 | 1.393805995  | 0.144944726 |
| Il11ra2 16158       | 1.086859353 | 0.450218696 | 1.907399471  | 0.088433925 |
| Traip 22036         | 1.086835718 | 0.454656906 | -1.823402228 | 0.222971531 |
| Psemb2 26445        | 1.086811087 | 0.281963062 | 1.154549443  | 0.152870768 |
| Ctsd 13033          | 1.08667127  | 0.272644435 | 1.007008677  | 0.478284738 |
| Polr2e 66420        | 1.086658486 | 0.307695769 | 1.013558807  | 0.468375825 |
| Pes1 64934          | 1.086284969 | 0.250446638 | 1.086284969  | 0.250446638 |
| Mrps23 64656        | 1.086259448 | 0.255142135 | 1.086259448  | 0.255142135 |
| Tspan14 52588       | 1.086189097 | 0.203473069 | 1.155909119  | 0.039261769 |
| Rab11b 19326        | 1.086174502 | 0.071228718 | 1.118874841  | 0.017130541 |
| Gsg2 14841          | 1.086094977 | 0.458740931 | 3.157199253  | 0.095887618 |
| Notum 77583         | 1.086084272 | 0.144193482 | 1.133862899  | 0.037374297 |
| St3gal5 20454       | 1.086062938 | 0.199441412 | 1.142989079  | 0.068787804 |
| Lhx6 16874          | 1.08605613  | 0.358705718 | 1.08605613   | 0.358705718 |
| Ccl3 20302          | 1.086052424 | 0.453058154 | 1.086052424  | 0.453058154 |
| Gm10941 100169878   | 1.086052424 | 0.453058154 | 1.086052424  | 0.453058154 |
| 2010107H07Rik 66487 | 1.085994761 | 0.359095345 | -1.006513589 | 0.489306191 |
| Calr 12317          | 1.085974964 | 0.344761552 | 1.168234706  | 0.224391832 |
| Fosl2 14284         | 1.085954689 | 0.345694509 | -1.023317827 | 0.451081186 |
| Mbd1 17190          | 1.08589517  | 0.327248393 | 1.08589517   | 0.327248393 |
| Tmem102 380705      | 1.08585406  | 0.266551761 | 1.08585406   | 0.266551761 |
| Slc27a1 26457       | 1.085795934 | 0.272659386 | 1.011155929  | 0.465981528 |
| Tmed2 56334         | 1.085730134 | 0.104897799 | 1.036517873  | 0.219835051 |
| Tada3 101206        | 1.085723638 | 0.309110671 | -1.014759494 | 0.461728763 |
| Tmem181a 77106      | 1.085682428 | 0.435321923 | -1.174056028 | 0.311131545 |
| Pde8b 218461        | 1.085654528 | 0.450540352 | 1.723251843  | 0.240544606 |
| Ndufa4 17992        | 1.085651223 | 0.310088146 | 1.006482231  | 0.484589132 |
| Cd44 12505          | 1.085646073 | 0.363669017 | 1.183582807  | 0.158371288 |
| Pigu 228812         | 1.085635707 | 0.270478436 | 1.012444533  | 0.461681864 |
| Tgoln1 22134        | 1.085531922 | 0.197789536 | 1.14532469   | 0.079176596 |
| Tpd52 21985         | 1.085529851 | 0.318283059 | 1.204624358  | 0.139890756 |

|                         |             |             |              |             |
|-------------------------|-------------|-------------|--------------|-------------|
| Ptp4a3 19245            | 1.085520925 | 0.238527633 | 1.192395865  | 0.029426637 |
| Mpg 268395              | 1.085511097 | 0.254992111 | 1.076578682  | 0.18950189  |
| Ppp1r3b 244416          | 1.085398176 | 0.347278004 | 1.094576619  | 0.251030605 |
| Qpct 70536              | 1.08534743  | 0.363457003 | 1.289135554  | 0.122936663 |
| Zc3h7a 106205           | 1.085345566 | 0.375526169 | 1.085345566  | 0.375526169 |
| Wsb1 78889              | 1.085230277 | 0.406001244 | -1.200579048 | 0.273208862 |
| Rbm4 19653              | 1.085184794 | 0.248265017 | -1.004482069 | 0.480638904 |
| Mir142 387160           | 1.085050047 | 0.445324408 | 1.085050047  | 0.445324408 |
| Atxn10 54138            | 1.085045678 | 0.222419446 | 1.046191092  | 0.236635886 |
| Pmm1 29858              | 1.084998216 | 0.314870878 | 1.095011281  | 0.150703152 |
| Hspa9 15526             | 1.084923675 | 0.200321554 | 1.034969455  | 0.35085359  |
| Vrk3 101568             | 1.08485355  | 0.131685967 | 1.05188388   | 0.235664943 |
| 9130023H24Rik 100043133 | 1.084767529 | 0.377566001 | 1.037724398  | 0.434758035 |
| Csnk1d 104318           | 1.084754463 | 0.241725671 | 1.179691532  | 0.054781414 |
| Samd4 74480             | 1.084739529 | 0.399972499 | 1.078573781  | 0.385758633 |
| Surf2 20931             | 1.084722231 | 0.277617136 | 1.093263201  | 0.160072283 |
| Ppp1r3g 76487           | 1.084670708 | 0.452651245 | 2.702090216  | 0.056083401 |
| 4930471M23Rik 74919     | 1.084489324 | 0.209867592 | 1.216460083  | 0.004581126 |
| Tmem55a 72519           | 1.084486822 | 0.42382563  | 1.017674719  | 0.480732338 |
| Gngt2 14710             | 1.084475181 | 0.39463207  | -1.064565628 | 0.390917777 |
| Gnb1 14688              | 1.084474879 | 0.149308179 | -1.005900891 | 0.453161967 |
| Ppfia4 68507            | 1.084459095 | 0.414566471 | 1.698385249  | 0.046333718 |
| Trmt2a 15547            | 1.084398484 | 0.311053032 | 1.084398484  | 0.311053032 |
| Ngdn 68966              | 1.08437247  | 0.28496557  | 1.005988434  | 0.482541992 |
| Adpgk 72141             | 1.084310036 | 0.265381248 | 1.010866184  | 0.464436803 |
| Timp2 21858             | 1.084270906 | 0.26251665  | 1.177624122  | 0.049774041 |
| 4930420K17Rik 652925    | 1.08423125  | 0.334989081 | -1.048063772 | 0.387656015 |
| Wisp1 22402             | 1.084225513 | 0.374281698 | -1.009969652 | 0.472508444 |
| Ptpmt1 66461            | 1.084197259 | 0.237832515 | 1.084197259  | 0.237832515 |
| Npepps 19155            | 1.08408593  | 0.177640496 | 1.142970378  | 0.056371584 |
| Cct2 12461              | 1.08406535  | 0.241771064 | -1.041189466 | 0.319297217 |
| A1bg 117586             | 1.083954317 | 0.438087623 | 1.052660912  | 0.455601444 |
| Exoc6b 75914            | 1.083938007 | 0.38416721  | -1.231381619 | 0.170111998 |
| Pde4a 18577             | 1.083934419 | 0.402530841 | 1.08663238   | 0.387351778 |
| Leprel2 14789           | 1.083906069 | 0.370686617 | -1.073685355 | 0.378509196 |
| Psma5 26442             | 1.083818748 | 0.253229805 | 1.083818748  | 0.253229805 |
| Sgpp1 81535             | 1.083721434 | 0.233803306 | 1.172280207  | 0.054813247 |
| Slx1b 75764             | 1.083663638 | 0.360668237 | -1.112280597 | 0.256147644 |
| Rab6a 19346             | 1.083614791 | 0.145186933 | 1.033526124  | 0.295629995 |
| Tmco6 71983             | 1.083493557 | 0.33564474  | 1.094866639  | 0.251148579 |
| Evl 14026               | 1.083423248 | 0.368642543 | 1.17975158   | 0.264148137 |
| Fam103a1 67148          | 1.08342132  | 0.271860838 | 1.179821162  | 0.050816024 |
| 2810432D09Rik 69961     | 1.083333523 | 0.343363097 | -1.020021886 | 0.460082287 |
| Nap1l4 17955            | 1.083298478 | 0.179459987 | 1.022283467  | 0.375278988 |
| Zfp266 77519            | 1.083228442 | 0.347272053 | 1.216532498  | 0.171594885 |
| Sdcbp 53378             | 1.083176945 | 0.308834546 | 1.195996425  | 0.125807373 |
| Atp2a2 11938            | 1.083095934 | 0.224848899 | 1.16862045   | 0.04821131  |
| Kctd9 105440            | 1.083095438 | 0.382275291 | 1.197735644  | 0.241461546 |
| Cdkl2 53886             | 1.083077333 | 0.425307361 | 1.517040546  | 0.162582138 |
| Mmp14 17387             | 1.082777658 | 0.2079883   | -1.03811656  | 0.172791667 |
| Zfp143 20841            | 1.082683399 | 0.417146364 | 1.289258227  | 0.09376157  |
| Ube2e3 22193            | 1.082581855 | 0.351303117 | 1.161381654  | 0.23641785  |
| Rcc2 108911             | 1.082577553 | 0.198446305 | 1.095992003  | 0.059341719 |

|                      |             |             |              |             |
|----------------------|-------------|-------------|--------------|-------------|
| Spire1 68166         | 1.082429567 | 0.447505891 | 1.489598533  | 0.284410012 |
| Srsf6 67996          | 1.082416638 | 0.305194903 | 1.317288776  | 0.004109346 |
| Bend3 331623         | 1.082353964 | 0.413988119 | 1.374312253  | 0.200079127 |
| Cdhr5 72040          | 1.082339859 | 0.336278383 | -1.05777321  | 0.356830266 |
| Emilin2 246707       | 1.082331257 | 0.402020139 | -1.285390659 | 0.183850289 |
| Wbscr16 94254        | 1.082318617 | 0.207931933 | 1.082318617  | 0.207931933 |
| Lpxn 107321          | 1.082201952 | 0.439612797 | -1.101525314 | 0.422065555 |
| 1810014F10Rik 69064  | 1.082130632 | 0.375274903 | -1.010453591 | 0.472171512 |
| Lsm7 66094           | 1.082031101 | 0.321452155 | 1.096413136  | 0.236142392 |
| Clk2 12748           | 1.081986784 | 0.374762805 | 1.318037196  | 0.104062637 |
| 2700089E24Rik 381820 | 1.08198324  | 0.194715279 | 1.207575562  | 0.00049618  |
| Aoah 27052           | 1.081879604 | 0.380756744 | 1.375486132  | 0.03974296  |
| 1190005I06Rik 68918  | 1.081878878 | 0.40777115  | -1.181571594 | 0.212233997 |
| Rp9 55934            | 1.081855922 | 0.352222056 | -1.039126579 | 0.423844511 |
| Chchd4 72170         | 1.081848011 | 0.210229102 | 1.048815418  | 0.316553147 |
| Fmnl2 71409          | 1.081809561 | 0.430638943 | 1.270173871  | 0.279896128 |
| Lcmt1 30949          | 1.081795411 | 0.334961605 | -1.025694167 | 0.44261247  |
| Nptn 20320           | 1.081770048 | 0.387315917 | 1.050661248  | 0.401864866 |
| Csf2rb 12983         | 1.081631575 | 0.377562304 | 1.022330389  | 0.458177503 |
| Phlpp2 244650        | 1.081622698 | 0.367768338 | 1.43447218   | 0.019596858 |
| Hsd12 72479          | 1.081603924 | 0.276573024 | 1.16828882   | 0.116775394 |
| Rbks 71336           | 1.081598082 | 0.331135661 | 1.197201625  | 0.116764256 |
| Ccdc22 54638         | 1.081575524 | 0.385296572 | 1.076916656  | 0.338502628 |
| Ficd 231630          | 1.081526956 | 0.374846562 | 1.396454163  | 0.037050858 |
| Flt3l 14256          | 1.081481232 | 0.338591597 | 1.266148809  | 0.0628531   |
| Gosr1 53334          | 1.081321437 | 0.348373764 | 1.339481242  | 0.042143678 |
| Arglu1 234023        | 1.081287652 | 0.238134179 | 1.128606277  | 0.150389507 |
| Tlr2 24088           | 1.081248721 | 0.427231261 | 1.081248721  | 0.427231261 |
| Zfp874b 408067       | 1.081171331 | 0.390361048 | -1.124593423 | 0.321563902 |
| Dnajb14 70604        | 1.081003896 | 0.414144845 | 1.081003896  | 0.414144845 |
| Slc25a46 67453       | 1.081002427 | 0.286637373 | 1.185677105  | 0.094054647 |
| Cox5a 12858          | 1.080987013 | 0.292671304 | 1.059135589  | 0.256173936 |
| Rpl39 67248          | 1.080974267 | 0.350800431 | -1.193406731 | 0.062575198 |
| Snrnp27 66618        | 1.080957935 | 0.33337295  | 1.080957935  | 0.33337295  |
| Nup50 18141          | 1.080955672 | 0.265120201 | 1.01837451   | 0.440351917 |
| Tmtc2 278279         | 1.080884295 | 0.345160219 | 1.152925267  | 0.074394016 |
| Cct4 12464           | 1.080821938 | 0.293463781 | 1.080821938  | 0.293463781 |
| Zbtb43 71834         | 1.080807875 | 0.376517069 | 1.188250654  | 0.234802805 |
| Usp15 14479          | 1.080657313 | 0.345061565 | 1.08972224   | 0.287838963 |
| Pex16 18633          | 1.080595138 | 0.257018469 | 1.041003311  | 0.374438122 |
| Rhbdl3 246104        | 1.080586766 | 0.455695994 | 2.154086947  | 0.161214996 |
| Rpn1 103963          | 1.080583616 | 0.2711452   | 1.142301461  | 0.139716485 |
| Mns1 17427           | 1.080506809 | 0.448789265 | 1.080506809  | 0.448789265 |
| Psma4 26441          | 1.080329678 | 0.212158544 | 1.028884475  | 0.378028074 |
| Rbm7 67010           | 1.080303003 | 0.394997739 | -1.083496636 | 0.392427122 |
| Wdr3 269470          | 1.080261854 | 0.383836619 | 1.202829521  | 0.258199947 |
| Cisd3 217149         | 1.079858626 | 0.317830877 | -1.103237296 | 0.214585606 |
| Pfdn2 18637          | 1.079783117 | 0.277608089 | 1.079783117  | 0.277608089 |
| Arsgl 74008          | 1.079659206 | 0.345283947 | 1.250889625  | 0.094726816 |
| Chd4 107932          | 1.079635185 | 0.106518557 | 1.044094053  | 0.212046539 |
| Asrgl1 66514         | 1.079613625 | 0.251067471 | 1.092454441  | 0.123033563 |
| Tmem223 66836        | 1.079577236 | 0.355670522 | -1.011428175 | 0.476943787 |
| Chmp1b 67064         | 1.07953913  | 0.354417073 | 1.228816534  | 0.153085127 |

|                      |             |             |              |             |
|----------------------|-------------|-------------|--------------|-------------|
| Stat5a 20850         | 1.079511593 | 0.334002161 | 1.19935139   | 0.153181279 |
| Ints2 70422          | 1.079497959 | 0.454785861 | -1.04057646  | 0.478336464 |
| Mrps17 66258         | 1.079496699 | 0.287896692 | 1.251797918  | 0.027601354 |
| Wbp5 22381           | 1.079471424 | 0.29646182  | -1.072115314 | 0.267867183 |
| Dpp3 75221           | 1.079413636 | 0.209523747 | 1.199687181  | 0.010229384 |
| Reep4 72549          | 1.079410784 | 0.344581431 | 1.226795671  | 0.131001432 |
| Clec1b 56760         | 1.079322173 | 0.33777992  | -1.070659112 | 0.304860204 |
| Yipf5 67180          | 1.079311358 | 0.319696199 | 1.13091405   | 0.138504833 |
| Maged2 80884         | 1.079206123 | 0.37418233  | 1.183998368  | 0.219676856 |
| Dusp10 63953         | 1.079201876 | 0.385976835 | 1.183086642  | 0.257890909 |
| Reep5 13476          | 1.079189999 | 0.39004607  | -1.158904486 | 0.24403699  |
| Ces2d-ps 667754      | 1.079186869 | 0.475508772 | 1            | #DIV/0!     |
| Arhgef10 72754       | 1.079151769 | 0.229557083 | 1.079151769  | 0.229557083 |
| Mettl10 72096        | 1.079133816 | 0.455798105 | -1.820480784 | 0.194152814 |
| Atp5k 11958          | 1.079097892 | 0.398907418 | 1.017452917  | 0.461526873 |
| Ints5 109077         | 1.079097418 | 0.275476601 | -1.010299919 | 0.457251033 |
| Adss 11566           | 1.079085581 | 0.297900557 | 1.053992875  | 0.270482456 |
| 8430419L09Rik 74525  | 1.079077339 | 0.163752046 | 1.032737082  | 0.320181029 |
| Repin1 58887         | 1.0789916   | 0.223630608 | 1.043067338  | 0.338672934 |
| H2afy2 404634        | 1.078990681 | 0.363661943 | 1.078990681  | 0.363661943 |
| Psap 19156           | 1.078982057 | 0.075109179 | 1.120915897  | 0.001977687 |
| 2310003F16Rik 67693  | 1.07892984  | 0.340134695 | -1.026159219 | 0.442103503 |
| Cblb 208650          | 1.078925146 | 0.352329398 | 1.078925146  | 0.352329398 |
| Gm10653 677044       | 1.078889156 | 0.330292325 | -1.145673729 | 0.093184406 |
| Hnrnpa0 77134        | 1.078885718 | 0.391546838 | -1.059662605 | 0.41965308  |
| Pign 27392           | 1.078873356 | 0.40726447  | 1.349526088  | 0.177192659 |
| Cntln 338349         | 1.078855992 | 0.465525078 | 1.656626026  | 0.330587367 |
| Itsn2 20403          | 1.078838715 | 0.423751379 | 1.845151606  | 0.007065639 |
| Ube2i 22196          | 1.078834428 | 0.211412677 | 1.085186595  | 0.115404787 |
| Hiatl1 66631         | 1.078737171 | 0.384720609 | 1.078737171  | 0.384720609 |
| Zfp454 237758        | 1.078505994 | 0.471601984 | -3.925       | 0.173296754 |
| Trmt112 67674        | 1.078433799 | 0.275830614 | 1.139457389  | 0.164170586 |
| Csrp1 13007          | 1.078426249 | 0.293636347 | 1.267396484  | 0.007077966 |
| Zfp251 71591         | 1.078322658 | 0.418428655 | -1.40270781  | 0.118445469 |
| Il10rb 16155         | 1.078200107 | 0.368547829 | 1.241204298  | 0.165668796 |
| Sf3a3 75062          | 1.078144048 | 0.293075751 | 1.154697293  | 0.129080959 |
| Zmat3 22401          | 1.078123853 | 0.316825305 | 1.160344126  | 0.184126886 |
| Adamts14 237360      | 1.078102686 | 0.357388849 | -1.074428568 | 0.339345207 |
| Gltscr2 68077        | 1.078044457 | 0.343750418 | -1.04006449  | 0.409609262 |
| Cabp4 73660          | 1.078041678 | 0.438923006 | 1.078041678  | 0.438923006 |
| Dync2h1 110350       | 1.078038272 | 0.436729072 | 1.078038272  | 0.436729072 |
| Tbc1d17 233204       | 1.077986698 | 0.215742728 | 1.017008298  | 0.418920328 |
| Tnfai8 106869        | 1.077920293 | 0.456191443 | -1.870393594 | 0.174549207 |
| Baz1b 22385          | 1.07791856  | 0.330002991 | 1.337842201  | 0.005320764 |
| Slc25a3 18674        | 1.077845968 | 0.087240142 | 1.03406787   | 0.167986606 |
| Tpra1 24100          | 1.077823079 | 0.324329209 | 1.190798038  | 0.139907344 |
| Chic1 12212          | 1.077733774 | 0.321129268 | 1.077733774  | 0.321129268 |
| Slbp 20492           | 1.077682923 | 0.402082691 | 1.22645061   | 0.230784511 |
| Cbwd1 226043         | 1.077535846 | 0.417524446 | 1.345184653  | 0.215474656 |
| Tnfrsf12a 27279      | 1.07752616  | 0.371306002 | 1.07752616   | 0.371306002 |
| Alb 11657            | 1.077519741 | 0.291317498 | -1.017123268 | 0.40057876  |
| 4933426M11Rik 217684 | 1.077433207 | 0.38502662  | 1.312026584  | 0.121762252 |
| Tmem11 216821        | 1.077398615 | 0.166675163 | 1.077398615  | 0.166675163 |



|                      |             |             |              |             |
|----------------------|-------------|-------------|--------------|-------------|
| Dtd1 66044           | 1.07735312  | 0.340733421 | 1.07735312   | 0.340733421 |
| Fam162a 70186        | 1.07731277  | 0.276551543 | -1.067562025 | 0.235721956 |
| Bambi 68010          | 1.077279985 | 0.404865931 | 1.077279985  | 0.404865931 |
| 2310036O22Rik 68544  | 1.077269218 | 0.30332975  | -1.108752923 | 0.105884014 |
| Bet1 12068           | 1.077262553 | 0.344538691 | 1.108174468  | 0.243396073 |
| Cox6b1 110323        | 1.077261655 | 0.359173132 | 1.068069645  | 0.346903726 |
| Rpl6 19988           | 1.077246533 | 0.319656676 | -1.003938184 | 0.490002355 |
| Gm5431 432555        | 1.077222838 | 0.464138274 | -2.542818182 | 0.142006587 |
| Unc119b 106840       | 1.077210809 | 0.187961651 | 1.12150259   | 0.092025596 |
| Id3 15903            | 1.077210676 | 0.360609504 | -1.001275695 | 0.496498582 |
| Rnaseh2c 68209       | 1.077205715 | 0.380443384 | -1.22922713  | 0.124878812 |
| Inpp4a 269180        | 1.077095485 | 0.259233229 | 1.226051294  | 0.016421595 |
| Adk 11534            | 1.077084843 | 0.321636576 | -1.034765672 | 0.400881108 |
| C130022K22Rik 232236 | 1.077041687 | 0.327936111 | 1.129267451  | 0.240971088 |
| Golga7 57437         | 1.076955687 | 0.292878123 | 1.258287549  | 0.01691387  |
| Dtnb 13528           | 1.076901833 | 0.286096435 | 1.076901833  | 0.286096435 |
| Ramp2 54409          | 1.076761469 | 0.330942472 | 1.076761469  | 0.330942472 |
| Unkl 74154           | 1.076704922 | 0.367045163 | 1.283748479  | 0.091230653 |
| Ankrd54 223690       | 1.076698625 | 0.352475507 | 1.337832237  | 0.031523653 |
| Ccdc134 76457        | 1.076611681 | 0.368010229 | 1.083921128  | 0.301400819 |
| Eif6 16418           | 1.076566601 | 0.286669599 | 1.174665295  | 0.093928658 |
| Prr24 66300          | 1.076491942 | 0.353983905 | 1.076491942  | 0.353983905 |
| Hspa1a 193740        | 1.076442159 | 0.43657184  | 1.095759061  | 0.422706344 |
| 1500003O03Rik 56398  | 1.076425973 | 0.311319748 | 1.161846264  | 0.13388833  |
| Mrpl51 66493         | 1.076346602 | 0.320633588 | 1.134507344  | 0.215975417 |
| Klk1b4 18048         | 1.0763041   | 0.449350488 | 1.305619716  | 0.263214304 |
| Plp2 18824           | 1.076280113 | 0.414674847 | -1.171043662 | 0.314061076 |
| Rdh1 107605          | 1.076280104 | 0.459574804 | 1.121266245  | 0.449231917 |
| Haus3 231123         | 1.076254903 | 0.440680469 | -1.709418759 | 0.079627308 |
| Atp6v1h 108664       | 1.076211613 | 0.372632561 | 1.177851539  | 0.252027092 |
| Cyp2c38 13097        | 1.07618707  | 0.25079926  | -1.055482724 | 0.221589241 |
| Cbx8 30951           | 1.076166869 | 0.324941296 | -1.048229113 | 0.325719443 |
| Metap2 56307         | 1.076061505 | 0.355587906 | 1.214011343  | 0.161569102 |
| Fnip2 329679         | 1.076016323 | 0.344854706 | -1.008264827 | 0.481009094 |
| 0910001L09Rik 66096  | 1.075959605 | 0.389239228 | -1.148679386 | 0.246680711 |
| Tmed5 73130          | 1.075944012 | 0.293605148 | -1.008181878 | 0.470768883 |
| 6430527G18Rik 238330 | 1.075928514 | 0.36510178  | -1.032015324 | 0.434440173 |
| Nipbl 71175          | 1.075899918 | 0.319076358 | 1.075899918  | 0.319076358 |
| Pon2 330260          | 1.075884537 | 0.202976285 | 1.075884537  | 0.202976285 |
| Zfp768 233890        | 1.075881983 | 0.170002497 | 1.173848562  | 0.005632875 |
| Ip6k1 27399          | 1.075878705 | 0.12212803  | 1.093770098  | 0.091053222 |
| Gfer 11692           | 1.075757281 | 0.29684678  | -1.027892036 | 0.382173758 |
| Uqcr10 66152         | 1.075746723 | 0.368194183 | -1.052285532 | 0.40384736  |
| Nfatc2ip 18020       | 1.075706994 | 0.392229019 | 1.306890655  | 0.145008195 |
| 1810055G02Rik 72056  | 1.075691347 | 0.394326584 | -1.03854622  | 0.423372397 |
| Slc25a12 78830       | 1.075536452 | 0.322915212 | 1.288123509  | 0.019379013 |
| Vapa 30960           | 1.075459618 | 0.250797338 | 1.082236757  | 0.043429535 |
| Laptm4a 17775        | 1.075450387 | 0.112991574 | 1.052277961  | 0.1977666   |
| Psma7 26444          | 1.075418987 | 0.308882603 | 1.016628267  | 0.456590027 |
| Nr1i2 18171          | 1.075407826 | 0.319276779 | -1.115435386 | 0.138165337 |
| Cd24a 12484          | 1.075392897 | 0.431797081 | 1.218269551  | 0.311411014 |
| Lats1 16798          | 1.075365448 | 0.368774021 | 1.377231438  | 0.03358538  |
| Slain2 75991         | 1.075234941 | 0.342669275 | 1.071575684  | 0.296671979 |

|                      |             |             |              |             |
|----------------------|-------------|-------------|--------------|-------------|
| Relb 19698           | 1.075113042 | 0.383085937 | -1.224928329 | 0.127998099 |
| Eif1ad 69860         | 1.075084755 | 0.265911283 | 1.039974966  | 0.325917088 |
| Arhgap19 71085       | 1.075033367 | 0.400491934 | -1.003839435 | 0.493252077 |
| Dynll2 68097         | 1.07501103  | 0.288253349 | 1.018551907  | 0.441765061 |
| Ndufa1 54405         | 1.07491647  | 0.35537482  | -1.048474192 | 0.396366999 |
| Asb1 65247           | 1.074794241 | 0.323025995 | -1.109454048 | 0.157641219 |
| Smarcd2 83796        | 1.074710478 | 0.311931901 | -1.020289483 | 0.438728682 |
| Ddx1 104721          | 1.074679831 | 0.260592628 | 1.157352619  | 0.047019296 |
| Atp5e 67126          | 1.074625581 | 0.398807337 | -1.008130747 | 0.483645016 |
| Dpm3 68563           | 1.074530506 | 0.378403206 | 1.058201637  | 0.374948926 |
| Nomo1 211548         | 1.074510555 | 0.204353071 | 1.137142251  | 0.03341458  |
| Bri3 55950           | 1.074509411 | 0.31266635  | -1.102535119 | 0.167290486 |
| Taf1 270627          | 1.074500014 | 0.373322462 | 1.01560491   | 0.474713828 |
| Vsig10 231668        | 1.074457937 | 0.411091259 | 1.074457937  | 0.411091259 |
| Nlrx1 270151         | 1.074369344 | 0.249474467 | 1.044502132  | 0.287060696 |
| Cct3 12462           | 1.074173837 | 0.250024348 | 1.082743904  | 0.15405835  |
| Gm12034 382492       | 1.074164494 | 0.363219469 | 1.074164494  | 0.363219469 |
| Top3a 21975          | 1.074140479 | 0.367290467 | 1.007545074  | 0.480285591 |
| Thada 240174         | 1.074042229 | 0.264405777 | 1.035533663  | 0.33871155  |
| Hmbox1 219150        | 1.073912168 | 0.352373737 | -1.032346773 | 0.422085096 |
| Pim3 223775          | 1.073759594 | 0.295473947 | 1.073759594  | 0.295473947 |
| Cecr2 330409         | 1.073647156 | 0.42610232  | -1.17704945  | 0.337175598 |
| Vbp1 22327           | 1.073593638 | 0.435744055 | -1.113814351 | 0.361019963 |
| Zfp874a 238692       | 1.073523936 | 0.39566485  | 1.068178108  | 0.389186211 |
| Dusp23 68440         | 1.073522842 | 0.372904839 | 1.073522842  | 0.372904839 |
| Ndfip1 65113         | 1.073420394 | 0.303961916 | 1.014492668  | 0.459542108 |
| Ttc39c 72747         | 1.073335508 | 0.250611124 | 1.082197512  | 0.12085714  |
| Dlgap4 228836        | 1.073271495 | 0.325899251 | -1.059915449 | 0.29038307  |
| Mpv17l 93734         | 1.073264894 | 0.254984686 | 1.005616611  | 0.476321528 |
| A630066F11Rik 320642 | 1.073188549 | 0.454012781 | 1.186385662  | 0.388215906 |
| Pbrm1 66923          | 1.073106343 | 0.391659985 | 1.27544016   | 0.16600237  |
| Cox6a1 12861         | 1.07300453  | 0.355760637 | -1.147218024 | 0.173901958 |
| Wwp2 66894           | 1.072990361 | 0.27315042  | 1.101244847  | 0.22701014  |
| Nfu1 56748           | 1.072934271 | 0.173638054 | 1.043242039  | 0.129985445 |
| Cox7c 12867          | 1.072883333 | 0.282432086 | 1.017084334  | 0.445177814 |
| Pard6a 56513         | 1.072805346 | 0.397481964 | 1.235839211  | 0.228932075 |
| Ap1b1 11764          | 1.07278517  | 0.190081897 | 1.106215641  | 0.117748172 |
| Bhmt 12116           | 1.072646553 | 0.412857783 | 1.053291853  | 0.423912674 |
| Ndufc2 68197         | 1.072645293 | 0.191500142 | 1.072645293  | 0.191500142 |
| Git2 26431           | 1.072596568 | 0.22903132  | 1.072596568  | 0.22903132  |
| Prdx5 54683          | 1.072581395 | 0.161400372 | 1.000601619  | 0.495449939 |
| Mavs 228607          | 1.072501247 | 0.257409292 | 1.072501247  | 0.257409292 |
| Iqck 434232          | 1.072370472 | 0.469052113 | 3.133345238  | 0.159901737 |
| Cog8 97484           | 1.072368797 | 0.326564401 | -1.00145676  | 0.49629199  |
| Ywhab 54401          | 1.072366785 | 0.138661793 | 1.049509414  | 0.079218733 |
| Fpr2 14289           | 1.072349951 | 0.462126442 | -1.052954382 | 0.472033354 |
| Msl1 74026           | 1.07231195  | 0.241835127 | 1.123664061  | 0.110662472 |
| Prtg 235472          | 1.072299933 | 0.465352052 | 1.255130842  | 0.411829119 |
| Phldb1 102693        | 1.072236466 | 0.294598592 | 1.134411809  | 0.176445413 |
| C030034I22Rik 77533  | 1.072217916 | 0.443561798 | 1.467459434  | 0.238551673 |
| 2400003C14Rik 71955  | 1.072194358 | 0.338952107 | 1.300481328  | 0.019737943 |
| Dnase1l1 69537       | 1.072140657 | 0.417117348 | 1.507573837  | 0.069599033 |
| Ttc27 74196          | 1.072107517 | 0.376330389 | -1.012829012 | 0.476509671 |

|                      |             |             |              |             |
|----------------------|-------------|-------------|--------------|-------------|
| 1200011M11Rik 74133  | 1.072096056 | 0.400885798 | 1.072096056  | 0.400885798 |
| Tulp3 22158          | 1.072087433 | 0.418613003 | -1.197394785 | 0.280029512 |
| Ccrl1 252837         | 1.072074399 | 0.388030421 | 1.072074399  | 0.388030421 |
| Pld3 18807           | 1.071961675 | 0.29428336  | -1.031300007 | 0.366799283 |
| Trmt6 66926          | 1.071897045 | 0.365901459 | -1.045871648 | 0.396284018 |
| Polr3f 70408         | 1.071803333 | 0.411668651 | -1.170104951 | 0.287301646 |
| Ppp1r14b 18938       | 1.071770937 | 0.327808891 | -1.033488571 | 0.390288144 |
| Unc119 22248         | 1.071753335 | 0.360552304 | -1.040693039 | 0.415460291 |
| Fnta 14272           | 1.071742493 | 0.268199551 | 1.079520122  | 0.156494912 |
| Uvrag 78610          | 1.071724666 | 0.352337402 | -1.159257617 | 0.111149574 |
| Nup85 445007         | 1.071632414 | 0.334717961 | 1.150343341  | 0.182575324 |
| Kcnn2 140492         | 1.071595298 | 0.351995927 | 1.090837859  | 0.2269716   |
| Nucks1 98415         | 1.071593439 | 0.266986019 | 1.208101713  | 0.024893192 |
| Crlf2 57914          | 1.071510551 | 0.404116461 | 1.215247129  | 0.263910778 |
| Prmt3 71974          | 1.071503588 | 0.354599063 | 1.323687082  | 0.019797953 |
| Dvl2 13543           | 1.071462688 | 0.273558109 | 1.205897188  | 0.033026109 |
| Mest 17294           | 1.071424571 | 0.403632338 | -1.071309181 | 0.391616968 |
| Qser1 99003          | 1.071314321 | 0.327715512 | 1.231836451  | 0.029067673 |
| Rfxap 170767         | 1.071263213 | 0.321773119 | 1.038605695  | 0.383558439 |
| Rab24 19336          | 1.071259303 | 0.325029217 | 1.001843538  | 0.494901893 |
| Ddx5 13207           | 1.071210077 | 0.29426807  | 1.158652805  | 0.114206209 |
| Gpx1 14775           | 1.071184106 | 0.407577806 | -1.03625752  | 0.411537361 |
| Pfkm 18642           | 1.071016185 | 0.284263997 | 1.015008564  | 0.448252078 |
| Plekhg3 263406       | 1.070878281 | 0.309393507 | 1.070878281  | 0.309393507 |
| Syncrip 56403        | 1.070864285 | 0.267088779 | 1.070864285  | 0.267088779 |
| Tep1 21745           | 1.070812839 | 0.372267078 | 1.276762686  | 0.079323297 |
| Rpl10 110954         | 1.070785032 | 0.37996076  | -1.220769596 | 0.08999936  |
| Fam13b 225358        | 1.070758151 | 0.40079841  | -1.108693708 | 0.345558774 |
| Fem1a 14154          | 1.070722567 | 0.283780636 | 1.110395739  | 0.104607817 |
| Cercam 99151         | 1.070617504 | 0.433378911 | -1.568173682 | 0.04804627  |
| Atp5h 71679          | 1.070336556 | 0.334838573 | -1.024253904 | 0.436158679 |
| Slc1a2 20511         | 1.070310126 | 0.312504741 | 1.231572348  | 0.017977479 |
| Anks3 72615          | 1.069996408 | 0.349442319 | 1.201979566  | 0.13325854  |
| Paf1 54624           | 1.069962197 | 0.356799309 | 1.069962197  | 0.356799309 |
| Pde1a 18573          | 1.069949569 | 0.367551466 | 1.142101223  | 0.17620642  |
| Snrpd1 20641         | 1.069942528 | 0.358973564 | 1.297735258  | 0.054074977 |
| Polr1d 20018         | 1.069764695 | 0.322690283 | -1.009049774 | 0.474673462 |
| Dlgap1 224997        | 1.069596606 | 0.449020026 | 1.293675631  | 0.313422222 |
| 1500010J02Rik 68964  | 1.06954805  | 0.367236017 | -1.168707916 | 0.146035975 |
| Terf1 21749          | 1.069491126 | 0.350906836 | 1.069491126  | 0.350906836 |
| Metrn 70083          | 1.069443278 | 0.431329155 | -1.226545361 | 0.250316678 |
| Psemb3 26446         | 1.069398564 | 0.325968484 | 1.269258731  | 0.021289661 |
| Sun2 223697          | 1.069316765 | 0.251447012 | 1.129976556  | 0.085855417 |
| Pqlc2 212555         | 1.069294876 | 0.293282885 | 1.128338699  | 0.175152118 |
| Tcf7l1 21415         | 1.069276421 | 0.200609912 | 1.116662111  | 0.064753203 |
| Scrn3 74616          | 1.069220787 | 0.326739958 | 1.180742164  | 0.116932854 |
| Nr2f1 13865          | 1.069209405 | 0.450242292 | 1.069209405  | 0.450242292 |
| Tyw3 209584          | 1.069124404 | 0.42641708  | -1.500880644 | 0.023347513 |
| Elovl3 12686         | 1.069096597 | 0.390983879 | 1.380466307  | 0.017876168 |
| Athl1 212974         | 1.069007682 | 0.279258891 | 1.217134334  | 0.016928835 |
| 1600021P15Rik 239796 | 1.068973047 | 0.304925885 | 1.068973047  | 0.304925885 |
| Retn 57264           | 1.068923993 | 0.479640709 | 1            | #DIV/0!     |
| Dhx8 217207          | 1.06888427  | 0.2729544   | 1.130747005  | 0.136276334 |

|                      |             |             |              |             |
|----------------------|-------------|-------------|--------------|-------------|
| Trafd1 231712        | 1.068777804 | 0.101955861 | 1.046464026  | 0.186981684 |
| Clec10a 17312        | 1.068695162 | 0.454103605 | 1.702630489  | 0.197137012 |
| Axin2 12006          | 1.068647342 | 0.437674088 | -1.090462378 | 0.388573598 |
| Fat4 329628          | 1.068601664 | 0.455768934 | 1.629101651  | 0.234637347 |
| Ccng1 12450          | 1.068567198 | 0.366157544 | 1.06105261   | 0.226331012 |
| Dnajc7 56354         | 1.068542336 | 0.3024558   | 1.068542336  | 0.3024558   |
| Acp5 11433           | 1.068519171 | 0.354951114 | -1.064269767 | 0.335234121 |
| Sf3b5 66125          | 1.068512488 | 0.278118319 | -1.001388811 | 0.49448098  |
| Sds 231691           | 1.068496117 | 0.308185578 | 1.068496117  | 0.308185578 |
| Cep110 26920         | 1.068427355 | 0.386074602 | 1.091652726  | 0.276810762 |
| Prdx1 18477          | 1.068358867 | 0.293148014 | 1.006110119  | 0.479473404 |
| Ppp1r10 52040        | 1.06830505  | 0.414416416 | 1.218964279  | 0.276630546 |
| Eef1d 66656          | 1.068206256 | 0.38984667  | -1.092226262 | 0.342080875 |
| 1110005A03Rik 74319  | 1.068170569 | 0.401624284 | 1.068170569  | 0.401624284 |
| Zfyve1 217695        | 1.067988949 | 0.271551072 | 1.141263817  | 0.100898626 |
| Tnfsf12 21944        | 1.067953283 | 0.304302032 | 1.23195814   | 0.014716657 |
| U2af2 22185          | 1.067929967 | 0.161975981 | -1.010832525 | 0.398138698 |
| 4833422C13Rik 373852 | 1.067924953 | 0.450940537 | 1.067924953  | 0.450940537 |
| Atg16l1 77040        | 1.067762742 | 0.301564514 | 1.165549449  | 0.04670278  |
| Rnasek 52898         | 1.067724892 | 0.389012776 | 1.118211505  | 0.278309334 |
| Cox7b 66142          | 1.06772174  | 0.288556542 | -1.069869249 | 0.207226186 |
| Dffa 13347           | 1.067674063 | 0.325678593 | 1.044126263  | 0.328885707 |
| Zfp462 242466        | 1.067670981 | 0.468077156 | -3.088025253 | 0.059099193 |
| Hoxb3 15410          | 1.067652568 | 0.433534054 | 1.657108054  | 0.063626753 |
| Stradb 227154        | 1.06761617  | 0.241001055 | 1.06761617   | 0.241001055 |
| Hist1h4i 319158      | 1.067578359 | 0.445357257 | 1.067578359  | 0.445357257 |
| Ndufc1 66377         | 1.067576247 | 0.316394455 | 1.054920426  | 0.311369071 |
| Nlgn2 216856         | 1.067575131 | 0.337700573 | 1.066711763  | 0.289823703 |
| ORF19 68767          | 1.067561377 | 0.295435379 | 1.067561377  | 0.295435379 |
| Arm6c6 76813         | 1.067496932 | 0.390446549 | 1.198407267  | 0.192566292 |
| Smg7 226517          | 1.067450674 | 0.319507303 | 1.188665904  | 0.004538998 |
| Pick1 18693          | 1.067411064 | 0.312848775 | 1.007692271  | 0.476210302 |
| Acaa1a 113868        | 1.067396806 | 0.330643955 | 1.192527906  | 0.08809275  |
| Mif 17319            | 1.067352342 | 0.341265428 | 1.033983598  | 0.401110804 |
| Pdcd6 18570          | 1.067313138 | 0.252460104 | 1.010080518  | 0.452884778 |
| Ankmy2 217473        | 1.067257094 | 0.356717828 | -1.050881107 | 0.376772163 |
| Arpc5 67771          | 1.067256034 | 0.305489131 | -1.000236795 | 0.499236737 |
| Tmem126a 66271       | 1.067122051 | 0.341784222 | -1.022788254 | 0.435282031 |
| Crls1 66586          | 1.067106293 | 0.289196861 | 1.032296671  | 0.396634997 |
| Sdhb 67680           | 1.066967488 | 0.306155044 | -1.078664478 | 0.212633125 |
| Ppap2c 50784         | 1.066957399 | 0.188395341 | 1.013651147  | 0.403316056 |
| Gp1bb 14724          | 1.066948925 | 0.47340076  | 1            | #DIV/0!     |
| Accn2 11419          | 1.066872736 | 0.322250453 | 1.14476459   | 0.146060978 |
| Dcaf17 75763         | 1.066870492 | 0.398066891 | 1.294769433  | 0.127075398 |
| Ccdc120 54648        | 1.066774137 | 0.457188577 | -1.166136669 | 0.383663267 |
| Cmpk1 66588          | 1.066771447 | 0.329229833 | 1.066771447  | 0.329229833 |
| Tmem59 56374         | 1.066749685 | 0.099229959 | 1.035983698  | 0.202135686 |
| Rock2 19878          | 1.066725026 | 0.40194844  | -1.276154027 | 0.091243995 |
| Ifi35 70110          | 1.066679089 | 0.373879242 | 1.142512617  | 0.253863697 |
| 2310046O06Rik 78323  | 1.066674239 | 0.349040039 | -1.076816673 | 0.254875839 |
| Clip3 76686          | 1.066656947 | 0.448754466 | 1.505525964  | 0.225818971 |
| Ndufa11 69875        | 1.066596686 | 0.370562332 | 1.219800452  | 0.138960825 |
| Med30 69790          | 1.066485981 | 0.427064246 | -1.180938971 | 0.31352457  |

|                      |             |             |              |             |
|----------------------|-------------|-------------|--------------|-------------|
| Actl6a 56456         | 1.066390357 | 0.344521254 | 1.177547285  | 0.100974622 |
| Rai12 54351          | 1.066304861 | 0.319483727 | 1.125879     | 0.190178917 |
| Rnf6 74132           | 1.066270865 | 0.392253745 | 1.406663044  | 0.032136233 |
| Hint3 66847          | 1.066243551 | 0.369760561 | -1.161889435 | 0.154122528 |
| Tmem41b 233724       | 1.066149966 | 0.311211826 | 1.000644007  | 0.497860073 |
| Fcrls 80891          | 1.066057669 | 0.479449757 | 1            | #DIV/0!     |
| Hpca 15444           | 1.065986332 | 0.469828932 | 1.050723353  | 0.475649888 |
| Lin7c 22343          | 1.06597756  | 0.405609623 | 1.466316549  | 0.033957232 |
| Fbxo3 57443          | 1.065948753 | 0.312110822 | 1.065948753  | 0.312110822 |
| Ndufb11 104130       | 1.065838811 | 0.357656454 | -1.056065545 | 0.359156333 |
| BC056474 414077      | 1.065718257 | 0.353370662 | 1.069785827  | 0.313336932 |
| Acbd3 170760         | 1.065661052 | 0.431372816 | 1.539346854  | 0.067540821 |
| Dbil5 13168          | 1.065632789 | 0.465486568 | -1.762234392 | 0.245786637 |
| Zfyve20 78287        | 1.065617898 | 0.397944258 | 1.194802343  | 0.248526173 |
| Pkp2 67451           | 1.065541946 | 0.361613481 | 1.150513598  | 0.11352343  |
| Aasdhppt 67618       | 1.065526441 | 0.353960268 | -1.148165598 | 0.100463928 |
| Mrps25 64658         | 1.065492083 | 0.310685832 | -1.083917898 | 0.139647901 |
| Morf4l2 56397        | 1.065485162 | 0.342874924 | 1.065485162  | 0.342874924 |
| Mllt6 246198         | 1.06545758  | 0.35860115  | 1.215875327  | 0.101642506 |
| Skap2 54353          | 1.065444759 | 0.30333961  | 1.065444759  | 0.30333961  |
| Nfia 18027           | 1.065435081 | 0.33692024  | 1.065435081  | 0.33692024  |
| Tpmt 22017           | 1.065434004 | 0.202949106 | 1.122786787  | 0.0247495   |
| Mrps9 69527          | 1.065410299 | 0.280586677 | 1.148551039  | 0.079707656 |
| Ptpn9 56294          | 1.065363442 | 0.389653469 | 1.371053843  | 0.044870288 |
| Mettl21a 67099       | 1.065218179 | 0.350604678 | 1.297523825  | 0.011987453 |
| Gpr132 56696         | 1.064979022 | 0.452242803 | -1.247905598 | 0.351791864 |
| Usp10 22224          | 1.064939893 | 0.333907933 | 1.103252947  | 0.181862053 |
| Spg21 27965          | 1.064864439 | 0.345207964 | 1.167150849  | 0.161097895 |
| Ccdc12 72654         | 1.064837754 | 0.358069321 | -1.064861912 | 0.327543388 |
| Dapk1 69635          | 1.064831719 | 0.372607647 | 1.335709418  | 0.026176055 |
| Zfp91 109910         | 1.064789829 | 0.364059889 | 1.11500455   | 0.282465548 |
| Smurf2 66313         | 1.064732737 | 0.388254338 | 1.309797591  | 0.044373658 |
| Ugt2a3 72094         | 1.06471723  | 0.247199967 | 1.026681091  | 0.388840763 |
| Slc31a2 20530        | 1.06470649  | 0.3040727   | 1.006284888  | 0.479468497 |
| Bre 107976           | 1.064667889 | 0.29890082  | 1.015058129  | 0.451127688 |
| Guk1 14923           | 1.064659256 | 0.295429945 | 1.00135206   | 0.495143498 |
| 9930104L06Rik 194268 | 1.06457793  | 0.393181087 | -1.056535514 | 0.39348814  |
| Dennd5b 320560       | 1.064506488 | 0.373548799 | 1.144389634  | 0.062273048 |
| Apip 56369           | 1.064461699 | 0.3705515   | -1.030032425 | 0.431737585 |
| Klf10 21847          | 1.064446922 | 0.442488119 | 1.472701876  | 0.189675533 |
| Mtch2 56428          | 1.06434301  | 0.174669434 | 1.028963109  | 0.319378412 |
| Tomm7 66169          | 1.064340907 | 0.328788163 | 1.064340907  | 0.328788163 |
| Zfp74 72723          | 1.064334303 | 0.353084457 | 1.073192885  | 0.256077182 |
| Spcs1 69019          | 1.064315625 | 0.264445959 | 1.100463334  | 0.173862127 |
| Tmem144 70652        | 1.064279543 | 0.46181974  | 1.064279543  | 0.46181974  |
| Mettl8 228019        | 1.064186663 | 0.362063824 | 1.102264258  | 0.223857243 |
| Hal 15109            | 1.06414678  | 0.291498787 | 1.06414678   | 0.291498787 |
| Ociad1 68095         | 1.064055109 | 0.289588897 | 1.019040907  | 0.414200459 |
| Dact1 59036          | 1.063991573 | 0.471955306 | -3.346162822 | 0.024440623 |
| Ubxn6 66530          | 1.063930698 | 0.352211589 | -1.043615491 | 0.384647415 |
| Grcc10 14790         | 1.063916958 | 0.374632244 | -1.184257422 | 0.095358596 |
| Ppm1b 19043          | 1.063907188 | 0.283196734 | 1.063907188  | 0.283196734 |
| Hira 15260           | 1.063898021 | 0.244755362 | 1.10565916   | 0.127648309 |

|                      |             |             |              |             |
|----------------------|-------------|-------------|--------------|-------------|
| Tubgcp4 51885        | 1.06389234  | 0.389297367 | -1.063417477 | 0.36976439  |
| Ccdc32 269336        | 1.063889745 | 0.390531317 | -1.066441555 | 0.364416521 |
| Ptpn1 19246          | 1.063671167 | 0.219627056 | -1.034088966 | 0.237607195 |
| Ssbp1 381760         | 1.063663051 | 0.351130585 | 1.161878515  | 0.178345294 |
| Arl13b 68146         | 1.063592745 | 0.44121243  | 1.063592745  | 0.44121243  |
| D19Bwg1357e 52874    | 1.063590734 | 0.329105273 | -1.016685563 | 0.435504096 |
| Vrk2 69922           | 1.063559598 | 0.299354778 | 1.204451565  | 0.016559101 |
| Elt1 170757          | 1.063515924 | 0.371150775 | -1.137158113 | 0.199256695 |
| Lman2 214895         | 1.063507647 | 0.372234991 | -1.069306499 | 0.342034605 |
| Snx1 56440           | 1.063469663 | 0.322376085 | 1.143647307  | 0.157681553 |
| Zrsr2 22184          | 1.063428369 | 0.380825857 | -1.051498355 | 0.385833727 |
| Cdk13 69562          | 1.063356031 | 0.367588965 | -1.141938471 | 0.176059505 |
| Pxmp3 19302          | 1.063323283 | 0.319909719 | 1.063323283  | 0.319909719 |
| Sec22b 20333         | 1.063290029 | 0.353807576 | 1.15161148   | 0.173430527 |
| Znhit6 229937        | 1.063257253 | 0.370831181 | -1.04764137  | 0.381833243 |
| Taf12 66464          | 1.063251213 | 0.310492839 | 1.000483639  | 0.498412203 |
| Trna1ap 71787        | 1.063201359 | 0.357038511 | 1.141747887  | 0.227455965 |
| Anapc16 52717        | 1.063166906 | 0.334680382 | -1.017491072 | 0.449457293 |
| Zfp961 234413        | 1.063067195 | 0.420666857 | -1.10656096  | 0.373733202 |
| Wdr5b 69544          | 1.063051434 | 0.444752659 | 1.063051434  | 0.444752659 |
| Mmadhc 109129        | 1.062921767 | 0.281562765 | -1.012886932 | 0.4392171   |
| Zfp869 66869         | 1.062899851 | 0.365922208 | 1.027662069  | 0.425864985 |
| Haus8 76478          | 1.062836481 | 0.415617477 | -1.336264302 | 0.055491208 |
| Vps54 245944         | 1.062784363 | 0.366968389 | -1.088389646 | 0.255562167 |
| Arhgap9 216445       | 1.062558448 | 0.400789567 | 1.062558448  | 0.400789567 |
| Fgfr1op 75296        | 1.062404177 | 0.400867971 | 1.192265255  | 0.245748225 |
| Zmynd11 66505        | 1.062400134 | 0.373042737 | 1.226715328  | 0.104308409 |
| Papd7 210106         | 1.062261467 | 0.409506487 | -1.060003618 | 0.388086728 |
| Rpl41 67945          | 1.062212403 | 0.415925813 | 1.001445342  | 0.496694815 |
| Fcgr4 246256         | 1.06216848  | 0.373558804 | 1.21275425   | 0.014430299 |
| Cnot6 104625         | 1.062146932 | 0.419759056 | 1.321723183  | 0.163338592 |
| Lrrc27 76612         | 1.062114754 | 0.456521627 | 1.062114754  | 0.456521627 |
| Commd6 66200         | 1.0621042   | 0.36058224  | 1.177348092  | 0.160770526 |
| 6430548M08Rik 234797 | 1.06198824  | 0.343691458 | -1.004759129 | 0.486739687 |
| Fgg 99571            | 1.061958809 | 0.307285601 | -1.005555273 | 0.478886743 |
| Tie1 21846           | 1.061926995 | 0.303427537 | 1.092759378  | 0.143386339 |
| Tsc22d3 14605        | 1.061879741 | 0.354530879 | 1.259634224  | 0.050758508 |
| Clip1 56430          | 1.061672378 | 0.417575685 | -1.006967121 | 0.48536121  |
| Chchd7 66433         | 1.061630912 | 0.382805943 | 1.061768432  | 0.376582716 |
| Ndufaf3 66706        | 1.061501929 | 0.359192866 | 1.161863335  | 0.147967335 |
| Drg1 13494           | 1.061480552 | 0.279961117 | 1.101833543  | 0.104049225 |
| Rassf6 73246         | 1.061287912 | 0.415008046 | -1.306489637 | 0.077879287 |
| Gm5887 545893        | 1.061258918 | 0.467754835 | -1.945954545 | 0.198949878 |
| Sor11 20660          | 1.061230764 | 0.449104921 | 1.061230764  | 0.449104921 |
| Chst14 72136         | 1.061168955 | 0.410066562 | 1.175910256  | 0.284712305 |
| Cyp8b1 13124         | 1.061077899 | 0.40175141  | 1.230282131  | 0.191059992 |
| Srd5a3 57357         | 1.060963816 | 0.300548873 | 1.052714104  | 0.293984939 |
| D7Ert143e 100303645  | 1.060942851 | 0.416989789 | 1.352486425  | 0.103314539 |
| Nhp2l1 20826         | 1.060882242 | 0.36788271  | -1.011145766 | 0.474028376 |
| Psmg1 56088          | 1.060700924 | 0.285322946 | 1.118459667  | 0.121906933 |
| Scnm1 69269          | 1.060692052 | 0.406558945 | 1.200138972  | 0.244117575 |
| 41163 52398          | 1.060654347 | 0.376707425 | 1.060654347  | 0.376707425 |
| Traf5 22033          | 1.06060285  | 0.40597247  | -1.068255074 | 0.380822465 |

|                     |             |             |              |             |
|---------------------|-------------|-------------|--------------|-------------|
| Hdgf 15191          | 1.060409853 | 0.105078052 | 1.090061254  | 0.027570989 |
| Mst1 15235          | 1.060408412 | 0.225771515 | -1.034700031 | 0.231512126 |
| Mrpl43 94067        | 1.060406058 | 0.279713436 | 1.016663994  | 0.396811795 |
| Psmc1 19179         | 1.060405412 | 0.25228939  | 1.082924681  | 0.101350772 |
| Cisd2 67006         | 1.060295209 | 0.346008445 | -1.000551398 | 0.498564601 |
| Ensa 56205          | 1.06005706  | 0.337480454 | -1.046193237 | 0.337300532 |
| Rpl38 67671         | 1.05997361  | 0.401507809 | -1.248344409 | 0.080789936 |
| Cyp2d34 223706      | 1.059930483 | 0.47540746  | -1.099033333 | 0.463232905 |
| Il2ra 16184         | 1.059622413 | 0.467687086 | -1.62524033  | 0.275850303 |
| Csrnp1 215418       | 1.059539642 | 0.391788253 | -1.054393853 | 0.386585531 |
| Pfdn1 67199         | 1.059516148 | 0.40160973  | 1.013264364  | 0.452990117 |
| Fam166a 68222       | 1.05947916  | 0.478923159 | 1            | #DIV/0!     |
| Top3b 21976         | 1.059474761 | 0.326653973 | 1.141342375  | 0.11437905  |
| Glrx3 30926         | 1.059363246 | 0.365969646 | 1.14825885   | 0.214913099 |
| Shf 435684          | 1.059351973 | 0.41570784  | -1.14737226  | 0.284177497 |
| Zfp704 170753       | 1.059339976 | 0.438094709 | -1.224252246 | 0.285027752 |
| Dohh 102115         | 1.059335289 | 0.372621223 | -1.029791301 | 0.427882262 |
| Slc12a2 20496       | 1.05932004  | 0.380595111 | 1.048314342  | 0.38013064  |
| D930048N14Rik 97775 | 1.059295821 | 0.454884171 | 1.125489435  | 0.378698794 |
| Lyrn4 380840        | 1.059277399 | 0.356571822 | 1.284917835  | 0.000161061 |
| Klc2 16594          | 1.059238113 | 0.339550724 | 1.109650389  | 0.244765013 |
| Ddx51 69663         | 1.059129974 | 0.381945787 | 1.171391329  | 0.171979959 |
| Slco1b2 28253       | 1.05904367  | 0.395558561 | 1.195109105  | 0.133255001 |
| Phb 18673           | 1.059028812 | 0.323900792 | -1.091297145 | 0.155831488 |
| Dync1h1 13424       | 1.058950039 | 0.336894776 | -1.000558179 | 0.497710236 |
| Cwc15 66070         | 1.058942358 | 0.250562367 | 1.131579613  | 0.036496497 |
| Fbxo42 213499       | 1.05884909  | 0.339977938 | -1.113203228 | 0.10220569  |
| Rpl32 19951         | 1.058748381 | 0.390421627 | -1.068699882 | 0.366050093 |
| Apol6 71939         | 1.058729856 | 0.478854904 | 1            | #DIV/0!     |
| Kcnj11 16514        | 1.058729856 | 0.478854904 | 1            | #DIV/0!     |
| Acta1 11459         | 1.058729856 | 0.478854904 | 1            | #DIV/0!     |
| F13a1 74145         | 1.058729856 | 0.478854904 | 1            | #DIV/0!     |
| Lrrc2 74249         | 1.058729856 | 0.478854904 | 1            | #DIV/0!     |
| Armc3 70882         | 1.058729856 | 0.478854904 | 1            | #DIV/0!     |
| Gm5150 381484       | 1.058729856 | 0.478854904 | 1            | #DIV/0!     |
| Rims3 242662        | 1.058729856 | 0.478854904 | 1            | #DIV/0!     |
| Stox1 216021        | 1.058729856 | 0.478854904 | 1            | #DIV/0!     |
| Nkx2-6 18092        | 1.058729856 | 0.478854904 | 1            | #DIV/0!     |
| Ghrl 58991          | 1.058729856 | 0.478854904 | 1            | #DIV/0!     |
| Usp43 216835        | 1.058729856 | 0.478854904 | 1            | #DIV/0!     |
| Ak5 229949          | 1.058729856 | 0.478854904 | 1            | #DIV/0!     |
| Aldh3a1 11670       | 1.058729856 | 0.478854904 | 1            | #DIV/0!     |
| Cacna1s 12292       | 1.058729856 | 0.478854904 | 1            | #DIV/0!     |
| Trim65 338364       | 1.058423947 | 0.421086614 | 1.453769808  | 0.056552051 |
| Atp8b1 54670        | 1.058380731 | 0.396407374 | 1.058380731  | 0.396407374 |
| Ppa2 74776          | 1.058299105 | 0.285857517 | 1.002939378  | 0.487561901 |
| O610007P14Rik 58520 | 1.058209106 | 0.362706569 | 1.276770016  | 0.022842332 |
| Ptrf 19285          | 1.058198035 | 0.392866342 | 1.158117148  | 0.254129171 |
| Atf3 11910          | 1.058165537 | 0.46253975  | -1.029676965 | 0.483450161 |
| Myl12a 67268        | 1.058065321 | 0.288220299 | -1.013768038 | 0.432828271 |
| Rps6kb1 72508       | 1.058057545 | 0.399212653 | 1.060284419  | 0.373134301 |
| Maml1 103806        | 1.057934045 | 0.366321974 | 1.057934045  | 0.366321974 |
| Fam13a 58909        | 1.057876436 | 0.422891222 | 1.46147508   | 0.063799628 |

|                     |             |             |              |             |
|---------------------|-------------|-------------|--------------|-------------|
| Pdss2 71365         | 1.057845368 | 0.420827417 | 1.039772076  | 0.422159465 |
| Mdn1 100019         | 1.057765338 | 0.409671829 | -1.039454683 | 0.441557174 |
| Zfp146 26465        | 1.057720221 | 0.440498622 | -1.215734453 | 0.298671328 |
| Gnptg 214505        | 1.057696785 | 0.291619    | 1.098884679  | 0.180783873 |
| 0610012H03Rik 74088 | 1.057663015 | 0.385101751 | 1.199079195  | 0.0997253   |
| Ufc1 66155          | 1.057583571 | 0.337800893 | 1.057583571  | 0.337800893 |
| Pold1 18971         | 1.057552945 | 0.43591897  | 1.057552945  | 0.43591897  |
| Stoml1 69106        | 1.057519855 | 0.331712918 | 1.052452876  | 0.323201503 |
| H2afz 51788         | 1.057435215 | 0.399282746 | -1.217195804 | 0.062835776 |
| Grb2 14784          | 1.057411683 | 0.143966452 | 1.123651951  | 0.002662088 |
| Etf1 225363         | 1.057376134 | 0.195968547 | 1.094166286  | 0.06964865  |
| Ccdc75 53951        | 1.057334465 | 0.32868158  | -1.013591577 | 0.454674002 |
| Hmgb1 15289         | 1.057281416 | 0.163296869 | 1.057281416  | 0.163296869 |
| Stub1 56424         | 1.057225172 | 0.307840998 | -1.001389446 | 0.494798598 |
| Ube2z 268470        | 1.057147361 | 0.23550374  | -1.001715018 | 0.486854431 |
| Pus1 56361          | 1.057052819 | 0.305824804 | 1.014454118  | 0.447547795 |
| Zfand3 21769        | 1.057013815 | 0.169289036 | 1.09786476   | 0.038873544 |
| Syt1 269589         | 1.057008938 | 0.405874933 | -1.0523086   | 0.416545329 |
| Atxn7l3 217218      | 1.056980517 | 0.341356971 | 1.241799427  | 0.01454146  |
| Slc44a2 68682       | 1.05697597  | 0.370936943 | 1.272184208  | 0.032883567 |
| Gan 209239          | 1.056971339 | 0.468215699 | 1.056971339  | 0.468215699 |
| 1810032O08Rik 66293 | 1.056919574 | 0.432307537 | 1.271188813  | 0.241143804 |
| Pdia6 71853         | 1.056873342 | 0.375914883 | -1.048986148 | 0.385658661 |
| Rps6kc1 320119      | 1.056821821 | 0.398290387 | 1.216661393  | 0.171029761 |
| Gmeb1 56809         | 1.056732805 | 0.354771964 | 1.056732805  | 0.354771964 |
| Nipal1 70701        | 1.056680988 | 0.395791298 | 1.092333876  | 0.303761993 |
| Dusp4 319520        | 1.056633307 | 0.465710977 | 1.491127627  | 0.297671603 |
| Sulf2 72043         | 1.05661879  | 0.414261866 | -1.090709326 | 0.298004476 |
| Slc4a8 59033        | 1.056479601 | 0.441174132 | 1.29730939   | 0.257014712 |
| H2-T9 15051         | 1.056441511 | 0.351788118 | -1.023405692 | 0.383534905 |
| Cog1 16834          | 1.05631956  | 0.276480225 | 1.033282048  | 0.307798649 |
| Orc3 50793          | 1.05629673  | 0.373331783 | 1.17502575   | 0.16149541  |
| Hyal1 15586         | 1.056281392 | 0.386019857 | 1.056281392  | 0.386019857 |
| Ncoa2 17978         | 1.056264256 | 0.448799233 | 1.36150933   | 0.18556115  |
| Heatr8 381538       | 1.056247287 | 0.468449533 | -1.859926552 | 0.19322266  |
| Daxx 13163          | 1.056241143 | 0.36219867  | -1.038830327 | 0.395324135 |
| Tmem192 73067       | 1.05618417  | 0.362623524 | 1.1349573    | 0.192985846 |
| Rapgef3 223864      | 1.056180164 | 0.412268648 | -1.120911463 | 0.304782248 |
| Dock9 105445        | 1.056096469 | 0.409686024 | 1.21010663   | 0.217083334 |
| Zfp553 233887       | 1.056088978 | 0.36369151  | -1.03117987  | 0.411032954 |
| 5730403B10Rik 66626 | 1.056043689 | 0.334255797 | 1.18653355   | 0.031838819 |
| Npc2 67963          | 1.056005199 | 0.362852177 | -1.151448248 | 0.033017163 |
| Arpc5l 74192        | 1.056001449 | 0.337126182 | -1.035334287 | 0.373486448 |
| Lpcat2 270084       | 1.0559651   | 0.462768579 | -1.588592905 | 0.170297701 |
| Ccdc6 76551         | 1.055855807 | 0.264567401 | -1.006476187 | 0.458983856 |
| Mnat1 17420         | 1.055853066 | 0.397638688 | 1.190221947  | 0.204912242 |
| Sdf2l1 64136        | 1.05579392  | 0.437091092 | 1.631022496  | 0.02547318  |
| Sarnp 66118         | 1.055776259 | 0.410279069 | 1.055776259  | 0.410279069 |
| Ccdc53 67282        | 1.055764203 | 0.378744029 | 1.055764203  | 0.378744029 |
| Evi5l 213027        | 1.055721735 | 0.433811988 | 1.196270936  | 0.309304052 |
| Zdhhc17 320150      | 1.055592328 | 0.433758312 | 1.259524294  | 0.251194636 |
| Gtf2e1 74197        | 1.055504352 | 0.445281464 | -1.220515186 | 0.307894961 |
| Snrpb 20638         | 1.055450387 | 0.348976602 | 1.055450387  | 0.348976602 |



|                      |             |             |              |             |
|----------------------|-------------|-------------|--------------|-------------|
| Rnf8 58230           | 1.05543866  | 0.373628012 | -1.139953572 | 0.152899179 |
| Adm 11535            | 1.055429784 | 0.382864623 | 1.055429784  | 0.382864623 |
| Ubxn2b 68053         | 1.055310054 | 0.462871313 | 1.055310054  | 0.462871313 |
| O610030E20Rik 68364  | 1.055291958 | 0.37581673  | -1.068883125 | 0.320215297 |
| AU022252 230696      | 1.055251323 | 0.142228768 | 1.024163074  | 0.288076573 |
| Klc3 232943          | 1.055249462 | 0.462827911 | -1.971155704 | 0.078069994 |
| Rbpj 19664           | 1.055238358 | 0.384330486 | 1.137936389  | 0.23177822  |
| Mettl11a 66617       | 1.055197001 | 0.387789507 | 1.23856589   | 0.074638499 |
| Stac3 237611         | 1.054789847 | 0.473261891 | 1.255130842  | 0.411829119 |
| Fdx1 14148           | 1.054570543 | 0.383918556 | -1.023086523 | 0.447319703 |
| Fuz 70300            | 1.054569799 | 0.381832624 | 1.126595861  | 0.220114731 |
| Psmc5 19184          | 1.054550354 | 0.322320108 | 1.054550354  | 0.322320108 |
| Epha2 13836          | 1.054534012 | 0.387177822 | 1.155490765  | 0.225924522 |
| Atf1 11908           | 1.054474617 | 0.421695207 | 1.29516672   | 0.145792618 |
| 1110002B05Rik 104725 | 1.054439532 | 0.328407021 | -1.004029037 | 0.485581938 |
| Slc24a6 170756       | 1.054436138 | 0.366907589 | -1.013798039 | 0.463465038 |
| Mtg1 212508          | 1.054355522 | 0.360704549 | -1.039094657 | 0.388116973 |
| Ltv1 353258          | 1.054293048 | 0.40245642  | 1.178454097  | 0.189369603 |
| Med26 70625          | 1.054261937 | 0.404174407 | 1.054261937  | 0.404174407 |
| Ptplad1 57874        | 1.05419143  | 0.307122569 | 1.102582419  | 0.186117209 |
| Bpnt1 23827          | 1.054152771 | 0.343071173 | 1.239947757  | 0.007367987 |
| Taf15 70439          | 1.054082867 | 0.388307124 | 1.054082867  | 0.388307124 |
| Tpr 108989           | 1.054002163 | 0.363978957 | 1.137486043  | 0.202510764 |
| Ndufb10 68342        | 1.054000207 | 0.365424154 | -1.052335881 | 0.348618012 |
| Fbxw11 103583        | 1.053938911 | 0.41555243  | -1.095935977 | 0.322132398 |
| 3110056O03Rik 73218  | 1.053841547 | 0.333448729 | 1.011665297  | 0.450328559 |
| Phka1 18679          | 1.053730951 | 0.426119916 | 1.426562935  | 0.077802347 |
| Rrp9 27966           | 1.053580842 | 0.315700639 | 1.18763534   | 0.02825545  |
| Fat1 14107           | 1.053547345 | 0.418576869 | 1.200154724  | 0.246572953 |
| Tm2d1 94043          | 1.053514047 | 0.446706256 | 1.462838761  | 0.147161923 |
| Mrps10 64657         | 1.05350729  | 0.346735911 | 1.05350729   | 0.346735911 |
| Pbx1 18514           | 1.053495253 | 0.391013301 | 1.141547082  | 0.199471078 |
| Arfgap1 228998       | 1.053438619 | 0.195058601 | 1.017622871  | 0.369338402 |
| C330018D20Rik 77422  | 1.053432831 | 0.437744571 | 1.212223225  | 0.263692457 |
| Ptpn2 19255          | 1.053400502 | 0.360094101 | 1.164913408  | 0.070737093 |
| Rab4a 19341          | 1.053381344 | 0.360291327 | 1.173653139  | 0.101529508 |
| Pcdhga4 93712        | 1.053296632 | 0.482972668 | 1            | #DIV/0!     |
| Trib2 217410         | 1.053251363 | 0.454843574 | -1.097085571 | 0.418501383 |
| Pxmp4 59038          | 1.053250394 | 0.289953867 | 1.077439868  | 0.233917904 |
| Mapk1 26413          | 1.053226371 | 0.372419638 | 1.055912235  | 0.278849401 |
| Abtb1 80283          | 1.053220393 | 0.314567429 | 1.00735939   | 0.473252148 |
| Gpc6 23888           | 1.053171252 | 0.437766867 | 1.255132388  | 0.200746292 |
| Nme7 171567          | 1.052981404 | 0.407692315 | -1.095244964 | 0.328265048 |
| lfngr2 15980         | 1.052911431 | 0.351256881 | 1.115769048  | 0.200939449 |
| Fus 233908           | 1.052897257 | 0.379073497 | 1.035376639  | 0.369441752 |
| BC031181 407819      | 1.052863579 | 0.301919477 | 1.052863579  | 0.301919477 |
| Hnrnpk 15387         | 1.052736968 | 0.33245029  | 1.096110131  | 0.224675498 |
| Exoc3l 277978        | 1.052717403 | 0.408299688 | 1.00080909   | 0.498612146 |
| Atp1b3 11933         | 1.052647013 | 0.346204489 | 1.109819467  | 0.223637775 |
| Tchp 77832           | 1.052643159 | 0.376408708 | 1.093851463  | 0.301268008 |
| Mlx 21428            | 1.052570957 | 0.352436763 | -1.110288084 | 0.134312545 |
| Grhpr 76238          | 1.052498791 | 0.358852954 | 1.162424387  | 0.118067019 |
| Ppp1r15b 108954      | 1.052490792 | 0.367024915 | 1.052490792  | 0.367024915 |

|                     |             |             |              |             |
|---------------------|-------------|-------------|--------------|-------------|
| Gm6525 624713       | 1.052371771 | 0.474664292 | 1.178571429  | 0.43416     |
| Fam25c 69134        | 1.052350366 | 0.433828434 | -1.211731089 | 0.230657108 |
| Cmc1 67899          | 1.052342599 | 0.39129722  | -1.040931791 | 0.405424457 |
| Col5a3 53867        | 1.052324368 | 0.430584742 | 1.026415415  | 0.448582492 |
| Calm2 12314         | 1.052260528 | 0.334441434 | 1.052260528  | 0.334441434 |
| Zdhhc7 102193       | 1.052229302 | 0.335252984 | 1.118382411  | 0.177794887 |
| Rps25 75617         | 1.052217526 | 0.37208387  | -1.117856819 | 0.174115652 |
| Zfp161 22666        | 1.052216219 | 0.427504721 | 1.052216219  | 0.427504721 |
| A430005L14Rik 97159 | 1.052198305 | 0.356068463 | 1.094722383  | 0.264329093 |
| Ahcy1 229709        | 1.05219701  | 0.393109732 | 1.284398922  | 0.05711628  |
| Zfp933 242747       | 1.052148515 | 0.439907673 | 1.075201585  | 0.410595076 |
| Preli2 77619        | 1.052023731 | 0.448290896 | 1.351739801  | 0.230183384 |
| Tgds 76355          | 1.052018645 | 0.40824618  | 1.209453859  | 0.120982041 |
| Vrk1 22367          | 1.051998157 | 0.40604068  | 1.044335979  | 0.404210433 |
| Tnfrsf26 244237     | 1.051934246 | 0.461822982 | 1.051934246  | 0.461822982 |
| Rnf11 29864         | 1.051853837 | 0.387152024 | -1.040933679 | 0.409250969 |
| Vhl 22346           | 1.051839811 | 0.363287675 | -1.066271931 | 0.269874871 |
| Gpihbp1 68453       | 1.051803328 | 0.387009795 | 1.055907388  | 0.342788987 |
| Vdac2 22334         | 1.051738988 | 0.340374077 | 1.027741442  | 0.364495376 |
| Zfp238 30928        | 1.051657002 | 0.402253658 | 1.12248861   | 0.213860626 |
| Pard6g 93737        | 1.051619067 | 0.471081746 | 1.051619067  | 0.471081746 |
| Pycr2 69051         | 1.051585999 | 0.41098804  | 1.051585999  | 0.41098804  |
| Zfp84 74352         | 1.051538293 | 0.439949275 | -1.145865814 | 0.275944095 |
| Thap6 381650        | 1.051529207 | 0.421239571 | 1.051529207  | 0.421239571 |
| Med13 327987        | 1.051453867 | 0.394767155 | 1.249881944  | 0.044954876 |
| Isca1 69046         | 1.051448919 | 0.333889368 | 1.131767448  | 0.111120227 |
| Gfm1 28030          | 1.051395379 | 0.395568946 | 1.200198858  | 0.147337514 |
| Mxd1 17119          | 1.051221916 | 0.401341275 | 1.166897915  | 0.18880935  |
| P4ha2 18452         | 1.051103207 | 0.409083043 | 1.051103207  | 0.409083043 |
| Ndufa13 67184       | 1.051020749 | 0.412123052 | -1.079675453 | 0.363800207 |
| Spryd4 66701        | 1.050984071 | 0.374652112 | -1.150622904 | 0.07312724  |
| Gm13611 622534      | 1.050937446 | 0.435198347 | -1.205252929 | 0.239862322 |
| Zfml 18139          | 1.050908421 | 0.425589977 | -1.271318125 | 0.132886456 |
| Rpl29 19944         | 1.050904067 | 0.418335496 | -1.121929649 | 0.299145944 |
| Hgd 15233           | 1.050898606 | 0.324403834 | 1.050898606  | 0.324403834 |
| Angptl4 57875       | 1.050791998 | 0.316493024 | 1.114327556  | 0.142884614 |
| Afap1 70292         | 1.05075476  | 0.468084928 | -1.281066738 | 0.335869801 |
| Impa1 55980         | 1.05069354  | 0.354983967 | 1.232534106  | 0.015739895 |
| Mapk13 26415        | 1.050648653 | 0.466112809 | -1.521596721 | 0.24318857  |
| Rab5b 19344         | 1.050582585 | 0.246537068 | 1.14268588   | 0.008292959 |
| Tbc1d30 74694       | 1.050573476 | 0.421334937 | -1.020792744 | 0.462789114 |
| Zfyve19 72008       | 1.050565573 | 0.34452806  | -1.077473814 | 0.191564914 |
| Larp7 28036         | 1.050365002 | 0.396882201 | 1.050365002  | 0.396882201 |
| Gpr68 238377        | 1.050347384 | 0.463103365 | 1.050347384  | 0.463103365 |
| Arfp2 76932         | 1.050309658 | 0.372793055 | -1.038609017 | 0.383755999 |
| Agap1 347722        | 1.050308884 | 0.35020742  | 1.221796888  | 0.015424929 |
| Hinfp 102423        | 1.050216166 | 0.455824589 | 1.606793227  | 0.110951371 |
| Cnbp 12785          | 1.050214831 | 0.336926772 | 1.1266631    | 0.142339072 |
| Slamf8 74748        | 1.050097764 | 0.47184832  | 1.998609651  | 0.185167526 |
| AW209491 105351     | 1.050072992 | 0.403336525 | -1.085627557 | 0.290154971 |
| H2-Ke2 14976        | 1.049969696 | 0.410756068 | 1.049969696  | 0.410756068 |
| Ccdc93 70829        | 1.049968769 | 0.378465908 | 1.121582077  | 0.22584182  |
| 2310061J03Rik 66391 | 1.049929987 | 0.411920597 | -1.080121227 | 0.358838888 |

|                      |             |             |              |             |
|----------------------|-------------|-------------|--------------|-------------|
| Arl11 219144         | 1.049875847 | 0.466464889 | -1.358507869 | 0.317300187 |
| Gm6654 626175        | 1.049758437 | 0.383513041 | 1.053253589  | 0.33131161  |
| Saal1 78935          | 1.049510018 | 0.433515613 | 1.028064249  | 0.446028134 |
| 1110051M20Rik 228356 | 1.04949852  | 0.445597683 | 1.144845445  | 0.317801845 |
| Mtx1 17827           | 1.049439524 | 0.388997208 | -1.052293392 | 0.376845898 |
| Timm13 30055         | 1.049409263 | 0.409479658 | 1.081196085  | 0.328703497 |
| Chad 12643           | 1.049166111 | 0.473925396 | -1.968383838 | 0.195840227 |
| Gle1 74412           | 1.04914493  | 0.35415994  | -1.089945394 | 0.198574647 |
| Fkbp4 14228          | 1.049094199 | 0.387781195 | -1.018278947 | 0.432173602 |
| Mybbp1a 18432        | 1.049088365 | 0.321459753 | 1.040721473  | 0.304066022 |
| Mam13 433586         | 1.049014894 | 0.425040784 | -1.125693186 | 0.294355732 |
| Adrb3 11556          | 1.049014799 | 0.445469304 | 1.282111314  | 0.250134728 |
| Lap3 66988           | 1.048942832 | 0.259212245 | -1.001359708 | 0.491020158 |
| Rnf13 24017          | 1.048901111 | 0.418110256 | 1.100960142  | 0.316979315 |
| Rpp14 67053          | 1.048873624 | 0.345306767 | 1.188630477  | 0.045998453 |
| Gja4 14612           | 1.048867905 | 0.338286219 | 1.047897675  | 0.260439467 |
| Ankrd28 105522       | 1.048849552 | 0.429474563 | 1.190686238  | 0.233636388 |
| Mrpl28 68611         | 1.048802053 | 0.419507117 | 1.24724495   | 0.150854463 |
| Nhs12 100042480      | 1.048774515 | 0.433945025 | 1.294371581  | 0.169548496 |
| Med9 192191          | 1.048725176 | 0.319860441 | 1.098937773  | 0.068168361 |
| Chst13 71797         | 1.048724181 | 0.416593356 | -1.083875058 | 0.358269833 |
| Tha1 71776           | 1.048703447 | 0.38910602  | 1.153909744  | 0.19722371  |
| Clu 12759            | 1.048694672 | 0.351778886 | -1.028920092 | 0.400361555 |
| Cenpa 12615          | 1.048600629 | 0.45737984  | -1.038179648 | 0.464023008 |
| 4921513D23Rik 223989 | 1.048578873 | 0.338352657 | 1.049205688  | 0.283587022 |
| Alkbh5 268420        | 1.048523621 | 0.253503721 | 1.067128033  | 0.108232403 |
| Pstpip1 19200        | 1.048453505 | 0.462874026 | 1.442046654  | 0.256672771 |
| Ctbs 74245           | 1.048434167 | 0.409152071 | 1.351611768  | 0.016571407 |
| Ube4b 63958          | 1.048423477 | 0.30191571  | -1.02273674  | 0.350244946 |
| Dennd1b 329260       | 1.048350453 | 0.454392735 | -1.554566441 | 0.08793987  |
| 4930579G24Rik 75939  | 1.048313939 | 0.454472086 | 1.704781267  | 0.057886952 |
| Mosc2 67247          | 1.048291154 | 0.179885708 | 1.013235232  | 0.37116271  |
| Znf512b 269401       | 1.048179542 | 0.420780298 | 1.048179542  | 0.420780298 |
| Comm9 76501          | 1.048175919 | 0.433777705 | 1.002490621  | 0.495946851 |
| Syt15 319508         | 1.048131501 | 0.438133211 | 1.436941739  | 0.096659449 |
| Bod1 69556           | 1.048096944 | 0.346377242 | -1.048356764 | 0.286775016 |
| 1110038F14Rik 117171 | 1.04809223  | 0.399428148 | -1.10528118  | 0.23639053  |
| 1810027010Rik 69186  | 1.048034504 | 0.428453382 | -1.18026315  | 0.211498899 |
| Myo1b 17912          | 1.048027123 | 0.401452713 | 1.190930429  | 0.159238374 |
| Etaa1 68145          | 1.047994359 | 0.462833131 | 1.577597564  | 0.188040321 |
| Add1 11518           | 1.047978867 | 0.3052414   | 1.047978867  | 0.3052414   |
| H1f0 14958           | 1.047971982 | 0.329916143 | 1.158308393  | 0.056955807 |
| Lrp5 16973           | 1.047950329 | 0.345435372 | 1.047950329  | 0.345435372 |
| Cp 12870             | 1.047874439 | 0.391552834 | -1.040284849 | 0.407555048 |
| Cbx1 12412           | 1.047860548 | 0.38677149  | 1.030023551  | 0.40251499  |
| Ano10 102566         | 1.047823409 | 0.383216244 | -1.134427424 | 0.151053648 |
| Akt2 11652           | 1.047818718 | 0.302575667 | 1.042397474  | 0.245369093 |
| 1500012F01Rik 68949  | 1.047800144 | 0.416341455 | -1.072173275 | 0.376702929 |
| Crybg3 224273        | 1.047705428 | 0.422058867 | 1.047705428  | 0.422058867 |
| Lsm2 27756           | 1.047697451 | 0.384509641 | 1.047697451  | 0.384509641 |
| Traf3 22031          | 1.047688303 | 0.442980204 | 1.337615115  | 0.173458508 |
| Prep1 19072          | 1.047662402 | 0.362692535 | 1.095907433  | 0.087861098 |
| 1810013L24Rik 69053  | 1.047650814 | 0.390189967 | 1.198928748  | 0.090436735 |

|                      |             |             |              |             |
|----------------------|-------------|-------------|--------------|-------------|
| Pgm3 109785          | 1.047622538 | 0.451485184 | 1.047622538  | 0.451485184 |
| Mepce 231803         | 1.047617733 | 0.383236107 | -1.141634357 | 0.093579333 |
| ltpa 16434           | 1.047562359 | 0.298312879 | -1.01717157  | 0.399913451 |
| Rabep1 54189         | 1.047549017 | 0.388131319 | 1.084751981  | 0.258238711 |
| Ppp1r11 76497        | 1.04751619  | 0.340413538 | 1.04751619   | 0.340413538 |
| Nt5c3 107569         | 1.047486301 | 0.363342403 | 1.19181163   | 0.058366165 |
| Gatad2a 234366       | 1.047335774 | 0.205548757 | 1.080582554  | 0.07871334  |
| Zfp827 622675        | 1.047269823 | 0.466562225 | 1.047269823  | 0.466562225 |
| Lgi4 243914          | 1.04726355  | 0.467083044 | 1.607982192  | 0.216077246 |
| Stoml2 66592         | 1.04719803  | 0.331448507 | -1.037153313 | 0.286696563 |
| Tmub1 64295          | 1.047161684 | 0.421760135 | 1.047161684  | 0.421760135 |
| Anxa4 11746          | 1.047085668 | 0.375994126 | 1.001450647  | 0.494743433 |
| Zfp316 54201         | 1.047029791 | 0.396332895 | 1.047029791  | 0.396332895 |
| Ctu2 66965           | 1.047011634 | 0.4216477   | 1.188870898  | 0.187724679 |
| Sqstm1 18412         | 1.04695866  | 0.330163097 | 1.04695866   | 0.330163097 |
| Snrpa1 68981         | 1.046927123 | 0.34380414  | -1.008886957 | 0.468712409 |
| Ankrd13c 433667      | 1.046912746 | 0.435923492 | 1.046912746  | 0.435923492 |
| Mrpl11 66419         | 1.04683162  | 0.351955262 | -1.029351122 | 0.383774767 |
| Gfra1 14585          | 1.046830408 | 0.426842745 | 1.041888343  | 0.438885553 |
| Osbpl7 71240         | 1.046787784 | 0.412389278 | 1.168536054  | 0.191177688 |
| Pafah1b1 18472       | 1.04676513  | 0.353303579 | 1.04676513   | 0.353303579 |
| Gsto1 14873          | 1.04671636  | 0.213208499 | 1.04671636   | 0.213208499 |
| Ciao1 26371          | 1.046640892 | 0.352488115 | -1.103561845 | 0.095162994 |
| Ppp4c 56420          | 1.046625704 | 0.412626578 | -1.069604691 | 0.37055003  |
| Rtn4r1 237847        | 1.046591779 | 0.335481157 | 1.046591779  | 0.335481157 |
| Doc2a 13446          | 1.046524843 | 0.437948668 | 1.046524843  | 0.437948668 |
| Tbx3 21386           | 1.046523573 | 0.4364452   | 1.046523573  | 0.4364452   |
| Golga2 99412         | 1.046505478 | 0.329261324 | 1.046505478  | 0.329261324 |
| Smarcd1 83797        | 1.04643864  | 0.411394424 | 1.184035717  | 0.144675885 |
| Terf2ip 57321        | 1.046327049 | 0.351836512 | 1.129500918  | 0.098773012 |
| Pbxip1 229534        | 1.046215897 | 0.303452471 | -1.021080398 | 0.372510481 |
| Appl2 216190         | 1.046178332 | 0.411279191 | -1.021756262 | 0.450105054 |
| Nab2 17937           | 1.04617662  | 0.356232168 | -1.018456152 | 0.434340812 |
| A230046K03Rik 319277 | 1.046125631 | 0.427722957 | 1.046125631  | 0.427722957 |
| Clec2d 93694         | 1.046119972 | 0.407324672 | -1.092433992 | 0.299045091 |
| Adrbk2 320129        | 1.045954062 | 0.458537381 | 1.437876758  | 0.204721188 |
| Tubb4a 22153         | 1.045883462 | 0.476788533 | -2.597803724 | 0.094986309 |
| Psmc6 67089          | 1.045857736 | 0.4053912   | -1.04416738  | 0.410584722 |
| Hmox2 15369          | 1.045832514 | 0.375952087 | 1.045832514  | 0.375952087 |
| Mrps24 64660         | 1.045778112 | 0.377004326 | -1.121189137 | 0.133604322 |
| Nenf 66208           | 1.045745837 | 0.441433771 | -1.034329296 | 0.450275874 |
| Zfp637 232337        | 1.045736321 | 0.357941536 | 1.045736321  | 0.357941536 |
| Acap3 140500         | 1.045727372 | 0.430694447 | 1.379233784  | 0.065282343 |
| Scamp1 107767        | 1.04571433  | 0.440350723 | 1.104600296  | 0.347368017 |
| H2-Q8 15019          | 1.045680531 | 0.393982094 | 1.140135801  | 0.218747916 |
| Rps4x 20102          | 1.04552847  | 0.405131177 | -1.057160725 | 0.3801631   |
| Gramd3 107022        | 1.04538473  | 0.371678501 | -1.039308899 | 0.37722193  |
| M6pr 17113           | 1.045348458 | 0.321066021 | -1.015769012 | 0.425329241 |
| Nop10 66181          | 1.045208127 | 0.350126417 | -1.089188119 | 0.126902733 |
| Mdh1 17449           | 1.045194302 | 0.288387106 | 1.018569141  | 0.350783567 |
| 2810004N23Rik 66523  | 1.045184664 | 0.275925891 | -1.00134802  | 0.491279079 |
| Serpina3h 546546     | 1.045182045 | 0.4734906   | 1.676433559  | 0.250918887 |
| Leprot 230514        | 1.045106158 | 0.381574103 | 1.007194569  | 0.467251711 |

|                     |             |             |              |             |
|---------------------|-------------|-------------|--------------|-------------|
| Map3k9 338372       | 1.044927387 | 0.474759578 | 1.044927387  | 0.474759578 |
| Ahsa2 268390        | 1.044904693 | 0.414731871 | 1.301924614  | 0.062338759 |
| Taf4a 228980        | 1.044874614 | 0.445351505 | 1.368443511  | 0.131551041 |
| Fam19a2 268354      | 1.044843054 | 0.460079045 | 1.044843054  | 0.460079045 |
| Irx3 16373          | 1.044829265 | 0.473844241 | -1.050159484 | 0.473962888 |
| Tmem57 66146        | 1.044810113 | 0.349781705 | -1.016146022 | 0.437618098 |
| Ruvbl1 56505        | 1.044791388 | 0.36219195  | 1.090607435  | 0.257993588 |
| Pigh 110417         | 1.044688494 | 0.453113978 | -1.307552335 | 0.200902064 |
| Jmjd4 194952        | 1.044672852 | 0.410276633 | 1.15087092   | 0.240069466 |
| Mpzl2 14012         | 1.04466721  | 0.412536628 | 1.206374629  | 0.145607222 |
| Spata22 380709      | 1.044655819 | 0.472348623 | 1.570378755  | 0.26713503  |
| 2300009A05Rik 69478 | 1.04465235  | 0.416838891 | -1.202058116 | 0.133463688 |
| Pbx2 18515          | 1.044333167 | 0.345977161 | -1.089029634 | 0.118312548 |
| Rnaset2b 68195      | 1.044196974 | 0.416851186 | -1.094216763 | 0.317317503 |
| Tmem87a 211499      | 1.044180319 | 0.439313104 | 1.044180319  | 0.439313104 |
| Pygo2 68911         | 1.044060614 | 0.363572616 | 1.189592877  | 0.046383864 |
| Smarcc1 20588       | 1.044041386 | 0.365438782 | 1.166122146  | 0.038495838 |
| 1600029D21Rik 76509 | 1.043910882 | 0.427844739 | 1.233868492  | 0.170387604 |
| Ankrd46 68839       | 1.043909915 | 0.412813771 | 1.280903219  | 0.051146032 |
| Nup155 170762       | 1.043875721 | 0.404953588 | 1.193060863  | 0.128363409 |
| Fam86 70511         | 1.043855548 | 0.428549753 | -1.091150262 | 0.357342623 |
| Parva 57342         | 1.043843344 | 0.275545139 | -1.000014169 | 0.499911077 |
| Fmo5 14263          | 1.043705453 | 0.3715978   | 1.152396721  | 0.0973439   |
| Ssbp2 66970         | 1.043691466 | 0.467163718 | 1.460557681  | 0.253663621 |
| Eif1b 68969         | 1.043683365 | 0.399979041 | 1.115752399  | 0.253601916 |
| Fbxo8 50753         | 1.043649422 | 0.354593323 | -1.018687929 | 0.428096778 |
| Hexdc 238023        | 1.04348564  | 0.417609677 | -1.074922681 | 0.337619517 |
| Rpl7a 27176         | 1.043371777 | 0.378146972 | 1.043371777  | 0.378146972 |
| Rusc2 100213        | 1.043366074 | 0.41036704  | 1.315747863  | 0.015621796 |
| Acadvl 11370        | 1.0433487   | 0.339538645 | 1.076300285  | 0.245776823 |
| Itpr1 16438         | 1.043277851 | 0.435483923 | 1.446264703  | 0.017267386 |
| Iffo1 320678        | 1.043181029 | 0.421441344 | -1.106751946 | 0.253130682 |
| Kdm5a 214899        | 1.04307399  | 0.411696518 | 1.151709386  | 0.232142595 |
| Ldha 16828          | 1.043034795 | 0.311241637 | 1.043034795  | 0.311241637 |
| Spnb1 20741         | 1.042825451 | 0.438819204 | 1.023844787  | 0.458512866 |
| Tpm4 326618         | 1.042811319 | 0.387128454 | -1.039795664 | 0.379130786 |
| Plekhg5 269608      | 1.042808789 | 0.434868425 | -1.136813849 | 0.246283824 |
| Setd8 67956         | 1.042761216 | 0.335538092 | -1.010102966 | 0.457432144 |
| Pdia4 12304         | 1.042759187 | 0.404629827 | 1.107860355  | 0.178010739 |
| Nsmce4a 67872       | 1.042683449 | 0.379675387 | 1.052895245  | 0.269463596 |
| Cygb 114886         | 1.042649758 | 0.391456043 | -1.074278843 | 0.149683471 |
| Ubl5 66177          | 1.042517285 | 0.40556746  | 1.047294182  | 0.363680359 |
| Nudc 18221          | 1.042514897 | 0.377735391 | 1.093377184  | 0.254264687 |
| Eif4e2 26987        | 1.042428881 | 0.168062973 | 1.038555402  | 0.118559341 |
| Ttyh3 78339         | 1.04233425  | 0.402067124 | -1.046371859 | 0.380409109 |
| Usp6nl 98910        | 1.042127469 | 0.457977596 | 1.498920319  | 0.113663649 |
| Socs7 192157        | 1.042109239 | 0.416286242 | 1.186218321  | 0.17683478  |
| Zfp326 54367        | 1.042098303 | 0.410397285 | -1.157415284 | 0.16052878  |
| Ap2m1 11773         | 1.042075856 | 0.304438608 | -1.017541985 | 0.378845932 |
| Tm6sf1 107769       | 1.042061804 | 0.471485723 | 2.472755473  | 0.008963823 |
| Pmpcb 73078         | 1.042056085 | 0.289117385 | 1.042056085  | 0.289117385 |
| Rasgef1b 320292     | 1.042054199 | 0.415492731 | 1.159220039  | 0.223985943 |
| Zfp932 69504        | 1.042036582 | 0.458964909 | 1.384357896  | 0.211368203 |

|                      |             |             |              |             |
|----------------------|-------------|-------------|--------------|-------------|
| Gpx3 14778           | 1.042036111 | 0.426871401 | -1.075375196 | 0.3743024   |
| Armcx3 71703         | 1.041784249 | 0.418963809 | 1.179736968  | 0.197951383 |
| Tmem64 100201        | 1.041709693 | 0.420982848 | 1.149218016  | 0.167805259 |
| Trim27 19720         | 1.04153422  | 0.409184376 | -1.095316825 | 0.264875932 |
| Clns1a 12729         | 1.041526075 | 0.354802517 | 1.042346024  | 0.332459728 |
| Cnot7 18983          | 1.041516234 | 0.440816261 | 1.076555219  | 0.380842365 |
| BC016495 225994      | 1.041504523 | 0.411015425 | 1.147754257  | 0.15792041  |
| Nck1 17973           | 1.041438576 | 0.451620836 | -1.112527997 | 0.362499838 |
| Ap3s2 11778          | 1.041329441 | 0.3262756   | 1.041329441  | 0.3262756   |
| Rnf139 75841         | 1.04125162  | 0.435524391 | -1.244976859 | 0.154567868 |
| Prkrip1 66801        | 1.041228212 | 0.387701975 | 1.033158905  | 0.397350654 |
| Heatr3 234549        | 1.041134807 | 0.386745485 | 1.111076625  | 0.212495632 |
| Pkig 18769           | 1.041121795 | 0.362490215 | -1.016795055 | 0.441055946 |
| Vegfb 22340          | 1.041104475 | 0.441094293 | -1.331364444 | 0.048911348 |
| Arnt 11863           | 1.04109199  | 0.420432797 | 1.326427468  | 0.019855119 |
| Dennd5a 19347        | 1.041064271 | 0.427961045 | 1.191811057  | 0.211419293 |
| Map1lc3b 67443       | 1.041043672 | 0.302135661 | 1.021515493  | 0.399469715 |
| Itga1 109700         | 1.040977649 | 0.447483451 | 1.128811049  | 0.284499114 |
| D130043K22Rik 210108 | 1.040797457 | 0.46879859  | 1.102644747  | 0.417911906 |
| Sucla2 20916         | 1.04073793  | 0.361207587 | 1.038333359  | 0.249344188 |
| Zfp740 68744         | 1.040718533 | 0.410240903 | 1.067860591  | 0.299667405 |
| Itsn1 16443          | 1.040711687 | 0.379470511 | 1.069927812  | 0.245870608 |
| D19ErtD386e 52013    | 1.040691163 | 0.408215423 | -1.131117315 | 0.078688399 |
| Rcbtb1 71330         | 1.040682857 | 0.361648098 | 1.186322308  | 0.02374231  |
| Gchfr 320415         | 1.040670437 | 0.432801096 | -1.150149504 | 0.23937959  |
| Rab2b 76338          | 1.040610708 | 0.463383537 | -1.245433755 | 0.315882053 |
| 4933439C10Rik 74476  | 1.040588313 | 0.447069642 | -1.151284521 | 0.268479841 |
| Api5 11800           | 1.040584024 | 0.34566109  | 1.017410292  | 0.402510509 |
| Camk2g 12325         | 1.040564127 | 0.440350022 | 1.424159469  | 0.040416191 |
| Rasd1 19416          | 1.040516294 | 0.448108028 | 1.315125143  | 0.165317412 |
| Srm 20810            | 1.040432866 | 0.404800345 | -1.060343997 | 0.352043218 |
| Ptprd 19266          | 1.040298374 | 0.403673045 | 1.129170445  | 0.203239233 |
| Junb 16477           | 1.040233867 | 0.439452258 | 1.040233867  | 0.439452258 |
| Dusp3 72349          | 1.040216437 | 0.339350187 | 1.068873369  | 0.204790453 |
| Gltp 56356           | 1.04012456  | 0.412895899 | -1.031084569 | 0.402724905 |
| Rhobtb1 69288        | 1.040086241 | 0.406731354 | -1.085713843 | 0.274881236 |
| Rnf144b 218215       | 1.04007826  | 0.427147666 | 1.384261311  | 0.002340552 |
| Rbfa 68731           | 1.040076154 | 0.40335319  | -1.055589019 | 0.361031504 |
| Amdhd1 71761         | 1.040066353 | 0.349884092 | 1.105386268  | 0.15078022  |
| Trmt12 68260         | 1.039986625 | 0.411781141 | 1.168116648  | 0.172689812 |
| 1110059G10Rik 66202  | 1.039986142 | 0.447693577 | -1.023695845 | 0.466642994 |
| Ormdl1 227102        | 1.039949475 | 0.411007192 | 1.130331081  | 0.248705106 |
| Zfp423 94187         | 1.039833438 | 0.477381501 | -2.121330272 | 0.121092804 |
| PsmD8 57296          | 1.039801903 | 0.382643961 | 1.091781581  | 0.251272411 |
| Efcab4a 213573       | 1.03979129  | 0.432807326 | -1.068090611 | 0.378477084 |
| Trp53inp2 68728      | 1.039762776 | 0.323719171 | 1.117191385  | 0.035158092 |
| Esrra 26379          | 1.039747424 | 0.397520233 | 1.039747424  | 0.397520233 |
| Chmp6 208092         | 1.039523368 | 0.381291095 | -1.002319867 | 0.49324376  |
| Hspbp1 66245         | 1.039497276 | 0.426386259 | 1.037086949  | 0.421089195 |
| Chpf2 100910         | 1.039453758 | 0.402610588 | -1.146039259 | 0.10940207  |
| Leng1 69757          | 1.039393188 | 0.40346209  | 1.078795837  | 0.325082768 |
| Myl12b 67938         | 1.039347027 | 0.294038939 | 1.027914583  | 0.236502233 |
| Otud4 73945          | 1.039242916 | 0.435253304 | 1.039242916  | 0.435253304 |

|                      |             |             |              |             |
|----------------------|-------------|-------------|--------------|-------------|
| Myo1e 71602          | 1.039214869 | 0.376204226 | 1.046548787  | 0.277137188 |
| Acaa1b 235674        | 1.039115686 | 0.410060203 | 1.039115686  | 0.410060203 |
| Serpina3m 20717      | 1.039110218 | 0.42489637  | 1.313210514  | 0.033940662 |
| 2210015D19Rik 76508  | 1.039059379 | 0.421361747 | 1.091425041  | 0.332315242 |
| Msi2 76626           | 1.039015915 | 0.425936687 | 1.197217957  | 0.171845936 |
| Prpf19 28000         | 1.038955151 | 0.248180015 | 1.038955151  | 0.248180015 |
| Mphosph9 269702      | 1.038944094 | 0.459841762 | 1.583041265  | 0.074068933 |
| Mnt 17428            | 1.038901869 | 0.441417824 | 1.062538005  | 0.38548346  |
| Tcp1 21454           | 1.038874116 | 0.262354346 | 1.081102511  | 0.072562986 |
| C230081A13Rik 244895 | 1.038801134 | 0.430746758 | -1.210886773 | 0.101154457 |
| Cdc42se1 57912       | 1.038787486 | 0.314090138 | 1.038787486  | 0.314090138 |
| Rnf40 233900         | 1.038776718 | 0.35849918  | 1.038776718  | 0.35849918  |
| BC002163 170658      | 1.038702161 | 0.418497781 | 1.055690883  | 0.344353784 |
| Spcs2 66624          | 1.038655727 | 0.400362262 | 1.038655727  | 0.400362262 |
| Mfhas1 52065         | 1.038634588 | 0.394213144 | -1.056735572 | 0.30456528  |
| Tmem141 51875        | 1.038624344 | 0.44704636  | -1.079535461 | 0.314750811 |
| Fam174a 67698        | 1.038615875 | 0.447452296 | 1.405734351  | 0.082701323 |
| Hectd1 207304        | 1.038589451 | 0.417817738 | 1.278511524  | 0.045120293 |
| Upf1 19704           | 1.038571555 | 0.293939408 | -1.003260556 | 0.478260303 |
| 2310003C23Rik 76425  | 1.038562985 | 0.374743903 | 1.117125484  | 0.128013223 |
| Rpusd3 101122        | 1.038550652 | 0.432762468 | 1.209319602  | 0.183421732 |
| Clec4a1 269799       | 1.038537309 | 0.450295223 | 1.038537309  | 0.450295223 |
| Tradd 71609          | 1.038439764 | 0.388450109 | -1.067704656 | 0.256008793 |
| Ube2d2 56550         | 1.038307688 | 0.364040314 | -1.015817483 | 0.420939383 |
| Grasp 56149          | 1.038307146 | 0.421836239 | 1.208702004  | 0.115613461 |
| Rapgef4 56508        | 1.038254046 | 0.446043621 | 1.224019235  | 0.2362299   |
| Atp6v1f 66144        | 1.038179674 | 0.40642296  | -1.049714869 | 0.37621942  |
| Lsm4 50783           | 1.038107358 | 0.422354234 | 1.038107358  | 0.422354234 |
| Rilpl2 80291         | 1.03808435  | 0.391830741 | -1.015003179 | 0.458334131 |
| Aif1 108897          | 1.038041005 | 0.480181115 | -2.514459712 | 0.094684578 |
| Csnk2b 13001         | 1.037959701 | 0.397120586 | 1.037959701  | 0.397120586 |
| Zfp703 353310        | 1.037854839 | 0.407586192 | 1.215030887  | 0.067692377 |
| Sec24d 69608         | 1.037853391 | 0.441912304 | -1.145084853 | 0.282190578 |
| Ccpg1 72278          | 1.037852176 | 0.385633739 | 1.137687179  | 0.122654832 |
| Nosip 66394          | 1.037833695 | 0.377521907 | -1.093306552 | 0.176891134 |
| Polr2f 69833         | 1.037821613 | 0.407763573 | -1.065080722 | 0.331979824 |
| Ddx6 13209           | 1.037810978 | 0.373358506 | 1.116767575  | 0.150044394 |
| Atf6b 12915          | 1.037807175 | 0.373413293 | -1.022903402 | 0.373099052 |
| Efnb1 13641          | 1.037723987 | 0.40271795  | -1.009559498 | 0.475381101 |
| Mcart6 67062         | 1.037609224 | 0.459717202 | 1.235327852  | 0.250688934 |
| Tprgl 67808          | 1.037602379 | 0.251281335 | 1.056798261  | 0.167958696 |
| Sirt4 75387          | 1.037477259 | 0.429821661 | -1.083582085 | 0.322965312 |
| Trp53 22059          | 1.037277498 | 0.370684518 | 1.037277498  | 0.370684518 |
| Ndufv1 17995         | 1.037160924 | 0.344585752 | 1.078277338  | 0.200502989 |
| Fev 260298           | 1.037151403 | 0.481934061 | 1.170129778  | 0.437059136 |
| Zfp771 244216        | 1.037033799 | 0.442643106 | -1.176420531 | 0.217838669 |
| Slc6a6 21366         | 1.036946045 | 0.410064073 | -1.171971761 | 0.030065014 |
| Hif1an 319594        | 1.036908688 | 0.39574058  | 1.109020924  | 0.207105065 |
| Rtf1 76246           | 1.036884072 | 0.400678094 | 1.061607156  | 0.28178943  |
| Map4k1 26411         | 1.036756663 | 0.466315338 | -1.44863836  | 0.140681049 |
| 2900092E17Rik 67278  | 1.036748069 | 0.430614025 | -1.11045224  | 0.285517018 |
| Zfp113 56314         | 1.036727857 | 0.450492395 | -1.05698373  | 0.424140714 |
| Gpr180 58245         | 1.036672736 | 0.377717723 | 1.102960845  | 0.196367065 |

|                 |             |             |              |             |
|-----------------|-------------|-------------|--------------|-------------|
| Vps28 66914     | 1.03664452  | 0.373844311 | 1.081216135  | 0.076204017 |
| Pgap3 320655    | 1.036581761 | 0.432180953 | 1.036581761  | 0.432180953 |
| Ap1s1 11769     | 1.036390851 | 0.378970526 | 1.084611559  | 0.240828038 |
| Cd320 54219     | 1.036390423 | 0.441945932 | 1.017455104  | 0.445881987 |
| Ndufb9 66218    | 1.036389332 | 0.41612047  | -1.059672507 | 0.36156747  |
| Rtn2 20167      | 1.036388056 | 0.474974131 | 1.411630972  | 0.230431711 |
| Ddit3 13198     | 1.036328546 | 0.451015349 | -1.039503374 | 0.425199032 |
| Mtfp1 67900     | 1.036311471 | 0.379256957 | 1.089997325  | 0.237512804 |
| St5 76954       | 1.036188438 | 0.384088745 | -1.016411979 | 0.444418113 |
| Dctn3 53598     | 1.036184775 | 0.337881678 | 1.036184775  | 0.337881678 |
| Mfsd5 106073    | 1.036177618 | 0.342658987 | 1.081227904  | 0.173616135 |
| Ywhaq 22630     | 1.036137499 | 0.35109594  | -1.007280623 | 0.4686964   |
| Rbm3 19652      | 1.036092207 | 0.425606633 | -1.110391281 | 0.252632246 |
| Tsc22d2 72033   | 1.03601744  | 0.446071885 | -1.116043316 | 0.338053941 |
| Mogs 57377      | 1.035994309 | 0.366368766 | -1.002701672 | 0.490037185 |
| Bckdhhb 12040   | 1.035866023 | 0.379029422 | 1.099758085  | 0.202439823 |
| Adat1 30947     | 1.035830054 | 0.41759194  | -1.0913058   | 0.219303429 |
| Tgfbr3 21814    | 1.035803691 | 0.441309601 | 1.417712684  | 0.005556594 |
| Rab32 67844     | 1.035787555 | 0.412003628 | 1.035787555  | 0.412003628 |
| Prdm4 72843     | 1.035739798 | 0.452317248 | 1.035739798  | 0.452317248 |
| Flywch2 76917   | 1.035707672 | 0.461699524 | 1.151176346  | 0.342582252 |
| Creb3 12913     | 1.035676868 | 0.365062845 | -1.015859629 | 0.39224967  |
| Scaf11 72193    | 1.035542388 | 0.375376577 | 1.09580224   | 0.182024785 |
| Fpgs 14287      | 1.035533978 | 0.313680692 | 1.035533978  | 0.313680692 |
| F9 14071        | 1.035434098 | 0.340967794 | -1.019752337 | 0.394598589 |
| Pdcd11 18572    | 1.035417946 | 0.397881915 | 1.117724638  | 0.167989424 |
| Khsrp 16549     | 1.03534671  | 0.319586362 | -1.051503699 | 0.164037123 |
| Dpagt1 13478    | 1.035278514 | 0.377855    | 1.115991036  | 0.098225013 |
| Marveld1 277010 | 1.035204851 | 0.416669229 | -1.054432311 | 0.371372599 |
| Tatdn1 69694    | 1.03517402  | 0.435455158 | 1.100189768  | 0.307252477 |
| Slc16a10 72472  | 1.035115635 | 0.362918284 | 1.035115635  | 0.362918284 |
| Ly6d 17068      | 1.035112766 | 0.466921851 | -1.059234226 | 0.437750051 |
| Cebpd 12609     | 1.035072685 | 0.412376255 | -1.001545342 | 0.494573113 |
| Copb1 70349     | 1.035062062 | 0.428012008 | 1.094163527  | 0.199711866 |
| Kbtbd4 67136    | 1.035018355 | 0.394061625 | -1.022676486 | 0.43166056  |
| Raf1 110157     | 1.034986035 | 0.340136026 | 1.098615665  | 0.092916058 |
| Med20 56771     | 1.034980995 | 0.419105678 | 1.171814496  | 0.139729053 |
| Cox4nb 18117    | 1.034969951 | 0.345574768 | 1.003327014  | 0.480879551 |
| Entpd1 12495    | 1.034956081 | 0.415063414 | 1.251409356  | 0.01962271  |
| Klhl5 71778     | 1.034934276 | 0.426618924 | 1.126376341  | 0.246136082 |
| Clic1 114584    | 1.034924036 | 0.393212606 | 1.112146658  | 0.194970811 |
| Asgr1 11889     | 1.03473217  | 0.30221865  | -1.006159361 | 0.455610188 |
| Npdc1 18146     | 1.034676098 | 0.451280329 | 1.192022443  | 0.231823885 |
| As3mt 57344     | 1.034609817 | 0.399398974 | 1.136197928  | 0.139517103 |
| Jtb 23922       | 1.034560203 | 0.420731279 | 1.040315899  | 0.395545044 |
| Vamp5 53620     | 1.034486848 | 0.407583777 | -1.053478745 | 0.230931982 |
| Eny2 223527     | 1.034456438 | 0.358000262 | -1.061369933 | 0.217666382 |
| Vkorc11l 69568  | 1.034418517 | 0.447915315 | 1.034418517  | 0.447915315 |
| Scyl1 78891     | 1.034300916 | 0.381830654 | 1.034300916  | 0.381830654 |
| Stard7 99138    | 1.03426648  | 0.347325339 | 1.087410945  | 0.153023594 |
| Darc 13349      | 1.03425913  | 0.475022835 | -1.208652636 | 0.361353141 |
| Xpo6 74204      | 1.034141916 | 0.342663868 | 1.073473537  | 0.189265331 |
| Tshz2 228911    | 1.034088455 | 0.441694752 | 1.366000979  | 0.022912932 |



|                     |             |             |              |             |
|---------------------|-------------|-------------|--------------|-------------|
| Znhit2-ps 29805     | 1.034044569 | 0.423712034 | 1.034044569  | 0.423712034 |
| Map4k5 399510       | 1.033931005 | 0.440677813 | 1.033931005  | 0.440677813 |
| Get4 67604          | 1.03390446  | 0.39037791  | 1.112982287  | 0.171691727 |
| Irs1 16367          | 1.033883562 | 0.455483575 | 1.033883562  | 0.455483575 |
| Irf8 15900          | 1.033847549 | 0.404824894 | 1.033847549  | 0.404824894 |
| CamI 12328          | 1.033723119 | 0.304901009 | -1.034442946 | 0.260643142 |
| Rilpl1 75695        | 1.033690519 | 0.428851408 | 1.032821678  | 0.423811641 |
| Smcr8 237782        | 1.033681734 | 0.406967697 | 1.12519811   | 0.191007203 |
| Gpt2 108682         | 1.033607405 | 0.410962032 | 1.211316911  | 0.044825041 |
| Mapkapk2 17164      | 1.033463284 | 0.331098421 | -1.025999253 | 0.294684101 |
| Pde2a 207728        | 1.033365011 | 0.387439306 | 1.105246855  | 0.181940333 |
| Cul2 71745          | 1.033180987 | 0.419673583 | -1.094038574 | 0.240965787 |
| Pcdhga8 93716       | 1.033166051 | 0.488590015 | -1.2762      | 0.173296754 |
| Nom1 433864         | 1.033129914 | 0.417337619 | 1.248934385  | 0.013130731 |
| Vps39 269338        | 1.033063599 | 0.425667899 | 1.137026941  | 0.229520246 |
| Tnfrsf1b 21938      | 1.033007379 | 0.396025881 | -1.046817649 | 0.338343432 |
| Rps11 27207         | 1.032975481 | 0.427589867 | 1.030688185  | 0.440251234 |
| Pnpla8 67452        | 1.032969853 | 0.426905907 | 1.126675062  | 0.255158148 |
| Abcb6 74104         | 1.032922357 | 0.349315108 | 1.08426284   | 0.134578579 |
| Actr3 74117         | 1.032891906 | 0.376946624 | 1.093226983  | 0.166212865 |
| Nme1 18102          | 1.032856738 | 0.415340399 | -1.059497747 | 0.321967056 |
| Nrtn 18188          | 1.032842049 | 0.473454408 | -1.331147262 | 0.28901939  |
| Rbm6 19654          | 1.032728399 | 0.429099706 | -1.101213717 | 0.265808223 |
| Mxra8 74761         | 1.032717737 | 0.41919838  | -1.049495907 | 0.3670167   |
| Ccdc72 66167        | 1.032603332 | 0.359558608 | 1.032603332  | 0.359558608 |
| Sart1 20227         | 1.032599905 | 0.36426803  | -1.033521102 | 0.312373465 |
| Mapk7 23939         | 1.032568222 | 0.432338558 | 1.036574575  | 0.427425685 |
| Xrn2 24128          | 1.032562676 | 0.421619046 | 1.227595028  | 0.062285366 |
| Tmem147 69804       | 1.032406509 | 0.395647116 | 1.012935034  | 0.441169749 |
| Gm10845 100038734   | 1.032388599 | 0.472591351 | 1.150923     | 0.355490412 |
| Stk38 232533        | 1.032233558 | 0.453261447 | 1.032233558  | 0.453261447 |
| Tmem176a 66058      | 1.032224274 | 0.426741409 | -1.12356619  | 0.156874689 |
| Slc7a2 11988        | 1.032207886 | 0.443890203 | 1.205385445  | 0.186762235 |
| Stk4 58231          | 1.032148689 | 0.449223488 | -1.008036019 | 0.480123257 |
| Rbmxl1 19656        | 1.032053382 | 0.367478764 | -1.088930452 | 0.039159547 |
| Ascc2 75452         | 1.03204562  | 0.417752914 | 1.134169576  | 0.191496489 |
| Slc33a1 11416       | 1.032009403 | 0.421609444 | 1.03739481   | 0.380197245 |
| Gne 50798           | 1.031997401 | 0.42758426  | 1.031997401  | 0.42758426  |
| Ppip5k2 227399      | 1.031883589 | 0.459590845 | 1.332356762  | 0.046705623 |
| Ranbp6 240614       | 1.031870883 | 0.459109333 | 1.207769874  | 0.232487438 |
| Rbbp6 19647         | 1.031771721 | 0.425053834 | 1.178732661  | 0.107866629 |
| Il34 76527          | 1.031640103 | 0.437860722 | 1.129641595  | 0.250743494 |
| Sema6b 20359        | 1.031629776 | 0.448900322 | -1.180638529 | 0.195339204 |
| Ccnf 12449          | 1.031626443 | 0.448449599 | -1.017159558 | 0.46895777  |
| Eef1g 67160         | 1.031552779 | 0.393806346 | 1.031552779  | 0.393806346 |
| Supv3l1 338359      | 1.03154544  | 0.412040922 | 1.03154544   | 0.412040922 |
| Cib1 23991          | 1.031466745 | 0.403577523 | -1.0245188   | 0.425941549 |
| 9130011E15Rik 71617 | 1.03140539  | 0.457017805 | -1.357366023 | 0.04944249  |
| Gm4980 245190       | 1.031309202 | 0.410958798 | 1.031309202  | 0.410958798 |
| 1700021F05Rik 67851 | 1.031241934 | 0.410701956 | 1.113953368  | 0.179101446 |
| Zfand2a 100494      | 1.031222663 | 0.466278931 | 1.272892174  | 0.26462553  |
| Fgfr1op2 67529      | 1.030997305 | 0.39753553  | 1.107668883  | 0.146780797 |
| Srd5a1 78925        | 1.030988231 | 0.422652986 | 1.122096218  | 0.230451784 |

|                      |             |             |              |             |
|----------------------|-------------|-------------|--------------|-------------|
| Fam167b 230766       | 1.030956762 | 0.441893877 | 1.030956762  | 0.441893877 |
| Snhg3 399101         | 1.030914058 | 0.451708131 | 1.058444277  | 0.35374077  |
| Spg20 229285         | 1.030870905 | 0.398004914 | 1.115046654  | 0.152445761 |
| Tmem93 66048         | 1.030789781 | 0.41174691  | 1.040585666  | 0.336052617 |
| Ctnnd1 12388         | 1.030763592 | 0.285887926 | 1.006539734  | 0.449926783 |
| Ank 11732            | 1.030659975 | 0.456069988 | 1.191633692  | 0.269568438 |
| Cobl 12808           | 1.030607321 | 0.448182822 | 1.120472552  | 0.308769326 |
| Nt5c 50773           | 1.03056609  | 0.447097481 | -1.115650863 | 0.306912105 |
| Eif3f 66085          | 1.03054027  | 0.392959494 | -1.049126367 | 0.274189505 |
| Cul1 26965           | 1.030403248 | 0.407541861 | -1.028140048 | 0.409900173 |
| Rnf7 19823           | 1.030383565 | 0.389720505 | 1.100174412  | 0.170539175 |
| Ubxn1 225896         | 1.030378523 | 0.432843544 | -1.06321177  | 0.364318072 |
| 3200002M19Rik 75430  | 1.030362211 | 0.434112666 | 1.030362211  | 0.434112666 |
| Adrb2 11555          | 1.030282449 | 0.476599463 | 1.600726015  | 0.175319646 |
| Nrxn2 18190          | 1.03021243  | 0.445502735 | -1.079038181 | 0.348885187 |
| Rbm22 66810          | 1.030203079 | 0.447030745 | -1.12262979  | 0.289438401 |
| Akap11 219181        | 1.030174637 | 0.408576164 | -1.050689886 | 0.318613681 |
| 6720456B07Rik 101314 | 1.030164874 | 0.39574189  | 1.042928472  | 0.326940898 |
| Actr5 109275         | 1.030123986 | 0.415358396 | 1.055331038  | 0.310450453 |
| Smek1 68734          | 1.030097816 | 0.397964029 | 1.030097816  | 0.397964029 |
| Cpne5 240058         | 1.03008618  | 0.47668013  | 2.00598855   | 0.039286495 |
| Fam116a 211922       | 1.030024585 | 0.422871558 | -1.033838059 | 0.395079482 |
| Usp4 22258           | 1.030018706 | 0.308527363 | 1.021634451  | 0.315413265 |
| Gpr107 277463        | 1.029932848 | 0.416137971 | 1.029932848  | 0.416137971 |
| Serpina1a 20700      | 1.029907427 | 0.419093664 | -1.159676216 | 0.030401264 |
| Phf8 320595          | 1.029717629 | 0.432273902 | 1.178872575  | 0.121717459 |
| Dbt 13171            | 1.029691484 | 0.443398516 | 1.236393591  | 0.079097585 |
| Cfi 12630            | 1.029616528 | 0.33814443  | 1.029616528  | 0.33814443  |
| Eef1a1 13627         | 1.029600776 | 0.402134168 | -1.117327514 | 0.073450869 |
| Psm6 66413           | 1.029562918 | 0.384102118 | 1.073234194  | 0.246013182 |
| Mtmr6 219135         | 1.029527696 | 0.461469678 | 1.489391889  | 0.036091845 |
| Cript 56724          | 1.029495329 | 0.425245941 | 1.113545953  | 0.245873927 |
| Prkag1 19082         | 1.029442294 | 0.386623818 | 1.029442294  | 0.386623818 |
| Ankle2 71782         | 1.029348716 | 0.413243071 | -1.060165036 | 0.281219082 |
| Tpd52l2 66314        | 1.0293067   | 0.377046479 | 1.0293067    | 0.377046479 |
| Ino80e 233875        | 1.029301919 | 0.411751219 | 1.187539781  | 0.052959055 |
| Cdk19 78334          | 1.02927731  | 0.456874793 | -1.160263518 | 0.277293121 |
| Rasip1 69903         | 1.029194124 | 0.461175342 | -1.262724048 | 0.013668692 |
| Rpap3 71919          | 1.029142823 | 0.415179047 | 1.121337205  | 0.13930065  |
| Mmachc 67096         | 1.029120457 | 0.434009335 | 1.235345917  | 0.068593948 |
| Lipo1 381236         | 1.029021087 | 0.484084416 | -1.695167316 | 0.261082002 |
| 2310057M21Rik 68277  | 1.029001405 | 0.469202185 | 1.029001405  | 0.469202185 |
| Romo1 67067          | 1.028987085 | 0.448867087 | -1.164967398 | 0.189974924 |
| Cdc11 109332         | 1.028944232 | 0.457582733 | -1.293880375 | 0.125263539 |
| Casd1 213819         | 1.028927415 | 0.456748475 | 1.421498738  | 0.029170958 |
| Myli1 218203         | 1.028912736 | 0.39525935  | 1.086670304  | 0.219487009 |
| Aste1 66595          | 1.028793623 | 0.456111039 | 1.201731026  | 0.238090158 |
| Zfp68 24135          | 1.028764685 | 0.444281771 | 1.014316953  | 0.461649126 |
| Rfx3 19726           | 1.028752559 | 0.481836072 | 1.679540169  | 0.22578993  |
| Pdc13 68833          | 1.028734802 | 0.442318847 | -1.179691266 | 0.034953893 |
| Ppp3ca 19055         | 1.028604321 | 0.450866311 | -1.068305486 | 0.38072702  |
| Cars 27267           | 1.028504577 | 0.4414467   | 1.014208715  | 0.464169855 |
| Rangap1 19387        | 1.028360684 | 0.340393488 | 1.065903662  | 0.169378802 |

|                      |             |             |              |             |
|----------------------|-------------|-------------|--------------|-------------|
| Slc35c1 228368       | 1.028356169 | 0.390276325 | 1.154371678  | 0.025638566 |
| Fam192a 102122       | 1.028266381 | 0.422717003 | 1.028266381  | 0.422717003 |
| Pcsk7 18554          | 1.028240114 | 0.389809818 | -1.081015315 | 0.166641379 |
| Il22ra1 230828       | 1.028227981 | 0.485054732 | -1.010293975 | 0.492306781 |
| Serpinf1 20317       | 1.028198478 | 0.422506787 | -1.158403919 | 0.049226507 |
| Crp 12944            | 1.028181588 | 0.375958302 | 1.099452374  | 0.08912434  |
| Pppdf 66496          | 1.02814979  | 0.431286107 | 1.026787035  | 0.418212079 |
| Mbl2 17195           | 1.02810957  | 0.449735033 | -1.09427341  | 0.230313477 |
| Ube2g1 67128         | 1.028082261 | 0.427584742 | 1.028082261  | 0.427584742 |
| Ces2a 102022         | 1.028058614 | 0.409359576 | -1.121813039 | 0.046444606 |
| Rod1 230257          | 1.027931464 | 0.451659415 | -1.092973543 | 0.350176581 |
| Aldh1a1 11668        | 1.027884152 | 0.452349291 | 1.356847753  | 0.031483136 |
| Dhrs7b 216820        | 1.027777271 | 0.412788072 | -1.048355679 | 0.340225268 |
| Ncstn 59287          | 1.027565119 | 0.331337146 | 1.027565119  | 0.331337146 |
| Lmna 16905           | 1.027516354 | 0.420764347 | -1.130843412 | 0.122011052 |
| Hcn2 15166           | 1.027459242 | 0.479915962 | 1.027459242  | 0.479915962 |
| Nol12 97961          | 1.027455095 | 0.455367376 | 1.101137926  | 0.328771078 |
| Anxa2 12306          | 1.027448377 | 0.432731018 | 1.112361258  | 0.232361464 |
| Ampd2 109674         | 1.027447251 | 0.39052368  | -1.01506447  | 0.410163235 |
| Dnajc3 100037258     | 1.027436302 | 0.418514117 | 1.110795888  | 0.202483993 |
| Polr3e 26939         | 1.027368025 | 0.405003282 | 1.108584752  | 0.151194293 |
| Sdf2 20316           | 1.027305553 | 0.434762477 | -1.086114382 | 0.249034462 |
| 1300014I06Rik 66895  | 1.027283641 | 0.359430092 | 1.058164366  | 0.225880692 |
| Cbfa2t3 12398        | 1.027281579 | 0.456134857 | 1.243589177  | 0.152647833 |
| Capza2 12343         | 1.027205294 | 0.44899673  | 1.344170465  | 0.010846873 |
| Jarid2 16468         | 1.027193415 | 0.452511121 | 1.317936737  | 0.065044269 |
| Sdhaf1 68332         | 1.027177927 | 0.433969936 | 1.096025905  | 0.280186184 |
| Vta1 66201           | 1.027140196 | 0.411270737 | 1.027140196  | 0.411270737 |
| Pex26 74043          | 1.027139484 | 0.395063269 | -1.019502188 | 0.420147273 |
| Ptprj 19271          | 1.027118661 | 0.441694876 | 1.268077114  | 0.042420158 |
| 1810026J23Rik 69773  | 1.027072493 | 0.430025016 | 1.097930629  | 0.259209456 |
| Ctps 51797           | 1.027011557 | 0.46959924  | 1.397315162  | 0.131700896 |
| Nop2 110109          | 1.026979301 | 0.370803856 | 1.03067097   | 0.322206954 |
| Uqcr11 66594         | 1.026888115 | 0.453523508 | -1.270734237 | 0.074218233 |
| Mrpl13 68537         | 1.026765837 | 0.426569435 | 1.086815043  | 0.276552792 |
| Podxl 27205          | 1.026736805 | 0.453941965 | 1.101496197  | 0.270321032 |
| Cyp3a59 100041449    | 1.026732748 | 0.457965217 | 1.026732748  | 0.457965217 |
| Nhp2 52530           | 1.026654299 | 0.429135892 | -1.005106377 | 0.479506975 |
| Tysnd1 71767         | 1.026617538 | 0.397513726 | 1.030799063  | 0.3280641   |
| Cetn2 26370          | 1.02658845  | 0.428088028 | 1.109831971  | 0.234753367 |
| Xcl1 16963           | 1.026549761 | 0.482029978 | 1.026549761  | 0.482029978 |
| Abcb4 18670          | 1.026545057 | 0.402710264 | 1.026545057  | 0.402710264 |
| 4831426I19Rik 212073 | 1.026439208 | 0.46272492  | 1.174969383  | 0.256208666 |
| Rhobtb3 73296        | 1.026418243 | 0.465630572 | 1.026418243  | 0.465630572 |
| Scmh1 29871          | 1.026340167 | 0.451075528 | -1.247519042 | 0.070485961 |
| F10 14058            | 1.026286911 | 0.448165162 | -1.137540204 | 0.211762776 |
| Zhx1 22770           | 1.026228915 | 0.450577799 | 1.182731745  | 0.193474816 |
| Zfp219 69890         | 1.026206134 | 0.427468395 | 1.030602537  | 0.382258976 |
| Rps13 68052          | 1.026113032 | 0.451388692 | -1.134710078 | 0.24593566  |
| 2310003L22Rik 69487  | 1.025991078 | 0.465854513 | 1.025991078  | 0.465854513 |
| BC031781 208768      | 1.025878751 | 0.457516344 | 1.249458946  | 0.130750674 |
| Plod3 26433          | 1.025818805 | 0.413831578 | -1.121966371 | 0.053814029 |
| Mark2 13728          | 1.025796107 | 0.41536501  | 1.025796107  | 0.41536501  |

|                      |             |             |              |             |
|----------------------|-------------|-------------|--------------|-------------|
| Cab39 12283          | 1.025755367 | 0.4170841   | 1.114884066  | 0.156079365 |
| Pgpep1 78444         | 1.025656778 | 0.488586072 | -1.049506076 | 0.483220987 |
| Lrrc47 72946         | 1.025652888 | 0.45418957  | 1.351512247  | 0.016450764 |
| Trrap 100683         | 1.025650422 | 0.434022196 | 1.025650422  | 0.434022196 |
| Psmc4 23996          | 1.025544766 | 0.420414258 | 1.068493459  | 0.303486292 |
| Rin2 74030           | 1.025522329 | 0.448758989 | 1.290711993  | 0.022697839 |
| Acmsd 266645         | 1.025476277 | 0.442212391 | -1.071686064 | 0.259784688 |
| Acpl2 235534         | 1.025385387 | 0.464953706 | 1.025385387  | 0.464953706 |
| Adam11 11488         | 1.025372984 | 0.472300637 | 1.2475301    | 0.28268363  |
| BC048546 232400      | 1.025328615 | 0.46042135  | -1.339354127 | 0.025133932 |
| S100a1 20193         | 1.025323963 | 0.443785676 | -1.114210375 | 0.227869492 |
| Syng2 20973          | 1.025322916 | 0.365733503 | -1.024683388 | 0.331575816 |
| E430018J23Rik 101604 | 1.025215439 | 0.452785481 | -1.075967883 | 0.352140925 |
| Supt16h 114741       | 1.025186582 | 0.460057808 | 1.002864943  | 0.494222506 |
| Rplp0 11837          | 1.025067961 | 0.447575506 | -1.079922347 | 0.339688142 |
| Rsc1a1 69994         | 1.025062158 | 0.40565155  | 1.025062158  | 0.40565155  |
| Eif4e 13684          | 1.025060433 | 0.427067969 | 1.058350467  | 0.34554544  |
| Fam173a 214917       | 1.02501217  | 0.446063491 | -1.09092278  | 0.306000804 |
| Chkb 12651           | 1.025012054 | 0.383861512 | -1.06407761  | 0.18412167  |
| B3gnt3 72297         | 1.024921279 | 0.463125444 | 1.024921279  | 0.463125444 |
| Alms1 236266         | 1.024912651 | 0.487792798 | -1.299585882 | 0.391329351 |
| Cda 72269            | 1.024905127 | 0.453618961 | 1.008583393  | 0.477762899 |
| Lipt2 67164          | 1.024862193 | 0.472871887 | -1.291346296 | 0.220673447 |
| A630072M18Rik 320770 | 1.02480799  | 0.448218691 | -1.109479346 | 0.268175408 |
| Fmo2 55990           | 1.024774999 | 0.473981824 | 1.44506833   | 0.122042068 |
| Aff4 93736           | 1.024749711 | 0.462613433 | 1.024749711  | 0.462613433 |
| Zbtb25 109929        | 1.024735984 | 0.474485889 | 1.603829401  | 0.060200606 |
| Grsf1 231413         | 1.024683795 | 0.451705463 | 1.148654681  | 0.244614302 |
| Zfp438 240186        | 1.024622101 | 0.470948377 | 1.024622101  | 0.470948377 |
| Bmyc 107771          | 1.024497892 | 0.466536913 | 1.44501659   | 0.022827161 |
| Grb14 50915          | 1.024390624 | 0.416536791 | -1.020555721 | 0.42881639  |
| Ube2c 68612          | 1.024372414 | 0.488649967 | -1.05694243  | 0.473102772 |
| Serinc2 230779       | 1.024263727 | 0.451427081 | 1.024263727  | 0.451427081 |
| Clta 12757           | 1.024229338 | 0.426480979 | -1.135381832 | 0.072112466 |
| Bmp2 12156           | 1.024221563 | 0.454612094 | -1.087781337 | 0.238566232 |
| Nin 18080            | 1.024142384 | 0.4720461   | -1.175097476 | 0.325257269 |
| Plod1 18822          | 1.024116546 | 0.414335746 | 1.107592139  | 0.097202694 |
| Zfp708 432769        | 1.023990083 | 0.48471126  | 1.527564287  | 0.274467785 |
| Gsk3a 606496         | 1.023971404 | 0.386529411 | 1.023971404  | 0.386529411 |
| Spag7 216873         | 1.023941841 | 0.42283118  | -1.129988121 | 0.061712705 |
| Mettl2 52686         | 1.023894272 | 0.415049281 | 1.072854396  | 0.256580831 |
| 9830147E19Rik 208111 | 1.023883784 | 0.472240089 | 1.023883784  | 0.472240089 |
| Ermp1 226090         | 1.023842801 | 0.447473292 | 1.029590551  | 0.420092929 |
| Snx6 72183           | 1.023842756 | 0.449397002 | 1.135330299  | 0.209941862 |
| Crbn 58799           | 1.023830965 | 0.454543227 | -1.120777103 | 0.222742975 |
| Pcnp 76302           | 1.023768287 | 0.405148375 | -1.034323725 | 0.354324249 |
| Bche 12038           | 1.023726344 | 0.424017264 | 1.067472837  | 0.220800524 |
| Med27 68975          | 1.023678874 | 0.450007591 | 1.105555817  | 0.30588405  |
| Luzp1 269593         | 1.02360694  | 0.45572889  | 1.185811875  | 0.187371048 |
| Arid2 77044          | 1.02359037  | 0.458147741 | 1.326126286  | 0.040042429 |
| Tmem140 68487        | 1.023529927 | 0.469245698 | 1.012939495  | 0.471320388 |
| Uqcrcq 22272         | 1.02337713  | 0.452964181 | -1.237854081 | 0.053547474 |
| Gnb2l1 14694         | 1.023354119 | 0.426775628 | 1.023354119  | 0.426775628 |

|                     |             |             |              |             |
|---------------------|-------------|-------------|--------------|-------------|
| Trib1 211770        | 1.023330154 | 0.443553077 | 1.179106552  | 0.077566212 |
| Ppp1r15a 17872      | 1.02325773  | 0.437312844 | 1.000508263  | 0.497893636 |
| Hamp 84506          | 1.023244527 | 0.476963022 | -1.333516211 | 0.221135604 |
| Lipa 16889          | 1.023216117 | 0.405612867 | 1.086039876  | 0.150143015 |
| Sec24b 99683        | 1.023087619 | 0.473554107 | 1.111801578  | 0.335791309 |
| GlrX 93692          | 1.023077909 | 0.438058989 | -1.057328772 | 0.348351692 |
| Rab11fip3 215445    | 1.023029859 | 0.460150166 | 1.023029859  | 0.460150166 |
| 2610001J05Rik 66520 | 1.022951498 | 0.43503403  | 1.022951498  | 0.43503403  |
| Fn3k 63828          | 1.022638367 | 0.469844052 | 1.068946061  | 0.40251434  |
| Dedd2 67379         | 1.022582546 | 0.432655461 | -1.035081725 | 0.399452527 |
| Psma3 19167         | 1.022580247 | 0.413287183 | -1.098121056 | 0.083314268 |
| Cdc42bpa 226751     | 1.022395629 | 0.414728865 | 1.002447438  | 0.482668097 |
| Myo10 17909         | 1.022351802 | 0.460278439 | 1.105003269  | 0.280170237 |
| Mrpl18 67681        | 1.022348518 | 0.409639047 | 1.088850201  | 0.134513797 |
| Exosc3 66362        | 1.022252373 | 0.445282008 | -1.072820957 | 0.300919017 |
| Ugt2b35 243085      | 1.022238478 | 0.464788677 | -1.164802976 | 0.25074828  |
| Ror1 26563          | 1.022104456 | 0.483295006 | -1.331816821 | 0.309415265 |
| Hnrnpu 51810        | 1.022102468 | 0.409435287 | -1.021534826 | 0.3482989   |
| Rab35 77407         | 1.022032937 | 0.390690691 | 1.022032937  | 0.390690691 |
| Imp4 27993          | 1.022017127 | 0.423874105 | 1.022017127  | 0.423874105 |
| Ap2a2 11772         | 1.02199817  | 0.353506723 | 1.093926214  | 0.013241627 |
| Tgfb2 21808         | 1.021958947 | 0.487184813 | -1.702123386 | 0.179137021 |
| Cybasc3 225912      | 1.021934806 | 0.425781282 | -1.072641455 | 0.204621359 |
| Sun1 77053          | 1.021909547 | 0.465899659 | 1.200603794  | 0.230356273 |
| Eif5 217869         | 1.021875882 | 0.44286005  | 1.136573325  | 0.166939183 |
| Ezh1 14055          | 1.021802172 | 0.436344476 | -1.126872319 | 0.142198258 |
| Alkbh7 66400        | 1.021797523 | 0.460227557 | -1.232248624 | 0.120479004 |
| Dpf2 19708          | 1.02177473  | 0.379149618 | -1.0655613   | 0.066887553 |
| Pole3 59001         | 1.02171032  | 0.453349593 | -1.102302273 | 0.281302821 |
| Brd3 67382          | 1.021657128 | 0.439519703 | 1.210481188  | 0.011723616 |
| Tsen54 76265        | 1.02160481  | 0.460806564 | -1.107416171 | 0.317163248 |
| Zfp282 101095       | 1.021515478 | 0.459667477 | 1.021515478  | 0.459667477 |
| Brd7 26992          | 1.021428926 | 0.45767172  | 1.118835343  | 0.295603185 |
| Zfp938 237411       | 1.021425643 | 0.471413757 | -1.099563419 | 0.367788642 |
| Ubap1 67123         | 1.021386111 | 0.40332838  | -1.025046568 | 0.382460943 |
| Nampt 59027         | 1.021375434 | 0.46628075  | 1.342864046  | 0.082594405 |
| Hnrnpr 74326        | 1.021288179 | 0.472099377 | -1.241572109 | 0.150612984 |
| Sephs2 20768        | 1.021179893 | 0.43147102  | -1.041038659 | 0.358821267 |
| Slc41a3 71699       | 1.02115634  | 0.444685608 | 1.13335405   | 0.175272059 |
| Tbc1d22b 381085     | 1.021144743 | 0.45656251  | 1.275439558  | 0.048270455 |
| Lmo2 16909          | 1.021103116 | 0.474812018 | 1.021103116  | 0.474812018 |
| Pam 18484           | 1.02097122  | 0.468890532 | -1.319594205 | 0.097399461 |
| Iqgap1 29875        | 1.020935158 | 0.471526163 | -1.052679202 | 0.347222446 |
| Fkbp2 14227         | 1.020848205 | 0.463099172 | -1.106340355 | 0.325398101 |
| Cnn2 12798          | 1.020839456 | 0.468233279 | -1.211463914 | 0.180096292 |
| Abce1 24015         | 1.020768371 | 0.442002152 | 1.195949076  | 0.041391212 |
| Prpf38b 66921       | 1.020746233 | 0.452068124 | 1.174093179  | 0.113499438 |
| Tyms 22171          | 1.020727143 | 0.461915378 | 1.042123663  | 0.391973405 |
| Hk1 15275           | 1.020713199 | 0.427807633 | 1.020713199  | 0.427807633 |
| Zfp36 22695         | 1.020709177 | 0.459163186 | 1.05080433   | 0.374021392 |
| Dhx36 72162         | 1.02063731  | 0.4704461   | 1.102720993  | 0.363886327 |
| 2310079F23Rik 78890 | 1.020586833 | 0.452930318 | 1.020586833  | 0.452930318 |
| Gxylt1 223827       | 1.020427309 | 0.468464613 | 1.402618159  | 0.026306629 |

|                      |             |             |              |             |
|----------------------|-------------|-------------|--------------|-------------|
| Pdik1 230809         | 1.020396464 | 0.466214876 | -1.124213882 | 0.310026513 |
| Cmtm7 102545         | 1.020318804 | 0.471143609 | -1.341707325 | 0.083580085 |
| Tox4 268741          | 1.019897709 | 0.449087785 | 1.131720381  | 0.187358236 |
| Hps3 12807           | 1.019838605 | 0.474874217 | -1.106239759 | 0.366712542 |
| Ttc3 22129           | 1.019835194 | 0.462939174 | 1.019835194  | 0.462939174 |
| Copz1 56447          | 1.019831029 | 0.403109721 | -1.023088064 | 0.376603091 |
| Qrich1 69232         | 1.019812352 | 0.447380629 | 1.098516246  | 0.243567544 |
| C030006K11Rik 223665 | 1.019806807 | 0.435983646 | 1.072298255  | 0.279319749 |
| Wdr33 74320          | 1.019768205 | 0.44590691  | 1.185876964  | 0.067334924 |
| Slc10a3 214601       | 1.019675783 | 0.473442595 | -1.200886068 | 0.253629413 |
| Sec63 140740         | 1.019645679 | 0.426586803 | 1.064652863  | 0.138044538 |
| Rpl23a 268449        | 1.019506263 | 0.45503279  | -1.088038629 | 0.300641492 |
| Pten 19211           | 1.019438863 | 0.430668459 | 1.019438863  | 0.430668459 |
| Tmem208 66320        | 1.019416564 | 0.453743919 | -1.061027791 | 0.349542777 |
| Pigq 14755           | 1.019320681 | 0.453638949 | 1.12758686   | 0.180948995 |
| Srp19 66384          | 1.019237379 | 0.432248372 | 1.019237379  | 0.432248372 |
| Dpm1 13480           | 1.01920118  | 0.4551124   | -1.038329081 | 0.377162248 |
| Itgb1 16412          | 1.019161853 | 0.428677624 | -1.048235239 | 0.309659194 |
| Oxnad1 218885        | 1.019041574 | 0.457972605 | -1.071441947 | 0.335540729 |
| B4galt5 56336        | 1.0190057   | 0.473902264 | 1.312523339  | 0.119019068 |
| A1314976 106821      | 1.018846508 | 0.46143972  | -1.057648839 | 0.361056367 |
| Sox5 20678           | 1.018818535 | 0.478816783 | -1.175737928 | 0.290714612 |
| Eif3k 73830          | 1.018714026 | 0.435686937 | -1.019142552 | 0.438232636 |
| Swi5 72931           | 1.018671267 | 0.409764973 | 1.058129666  | 0.233586443 |
| Bdh2 69772           | 1.018586698 | 0.479154571 | -1.187593547 | 0.223173542 |
| Ccndbp1 17151        | 1.018579902 | 0.409552294 | 1.018579902  | 0.409552294 |
| Fam18b 67510         | 1.018475829 | 0.476621925 | 1.018475829  | 0.476621925 |
| Dus4l 71916          | 1.018444149 | 0.477056822 | -1.395534711 | 0.103264352 |
| Scamp2 24044         | 1.018434393 | 0.436757568 | 1.024226022  | 0.397211672 |
| Xbp1 22433           | 1.018423263 | 0.443745796 | 1.170521628  | 0.072275645 |
| Ssrp1 20833          | 1.018368715 | 0.436116157 | -1.120584944 | 0.078125447 |
| Ttc5 219022          | 1.018358686 | 0.465540555 | -1.053453626 | 0.402567768 |
| Sesn2 230784         | 1.018356401 | 0.475755006 | -1.20679763  | 0.254229228 |
| Arvcf 11877          | 1.018355439 | 0.459472479 | 1.131433899  | 0.200226204 |
| Wapal 218914         | 1.018329034 | 0.469246113 | 1.189577669  | 0.219717309 |
| Sec61b 66212         | 1.01821988  | 0.454612919 | 1.036206423  | 0.396889079 |
| Ighmbp2 20589        | 1.018208116 | 0.446535569 | 1.113188276  | 0.18853813  |
| Sumo2 170930         | 1.018184357 | 0.458918765 | 1.018184357  | 0.458918765 |
| Gm14288 13999        | 1.018093582 | 0.467529208 | -1.11475572  | 0.308282912 |
| Aagab 66939          | 1.018078504 | 0.395409654 | -1.011061091 | 0.433947659 |
| Snx29 74478          | 1.018047782 | 0.486072294 | -1.353359962 | 0.293706138 |
| Sap30l 50724         | 1.017992347 | 0.464201951 | -1.132876152 | 0.235210056 |
| Nsa2 59050           | 1.017991562 | 0.420950494 | 1.017991562  | 0.420950494 |
| 5530601H04Rik 71445  | 1.017970554 | 0.48167536  | -1.173877573 | 0.318484866 |
| 9130011J15Rik 66818  | 1.017960308 | 0.430158761 | 1.084977563  | 0.189553095 |
| Nedd8 18002          | 1.017889368 | 0.4395906   | 1.105654644  | 0.157879435 |
| Ccrl2 54199          | 1.017886021 | 0.485389987 | 1.330957295  | 0.296902167 |
| Slc45a4 106068       | 1.017881361 | 0.474863693 | -1.137839492 | 0.294786809 |
| Icosl 50723          | 1.017771752 | 0.476131604 | 1.017771752  | 0.476131604 |
| Ppp2ca 19052         | 1.017703547 | 0.457657667 | -1.18857335  | 0.078882086 |
| Mlycd 56690          | 1.017664553 | 0.461456636 | -1.054319121 | 0.391367461 |
| Thoc2 331401         | 1.017643681 | 0.479141697 | 1.254441175  | 0.252899506 |
| Pmf1 67037           | 1.017628239 | 0.455687555 | 1.017628239  | 0.455687555 |

|                         |             |             |              |             |
|-------------------------|-------------|-------------|--------------|-------------|
| 1810031K17Rik 69171     | 1.017598902 | 0.405266858 | -1.013869284 | 0.365124449 |
| Hip1 215114             | 1.017536269 | 0.470958152 | 1.141808939  | 0.297953629 |
| Tbcel 272589            | 1.017533044 | 0.477890412 | 1.53438233   | 0.014192859 |
| Dbr1 83703              | 1.017472419 | 0.449988491 | 1.190053278  | 0.045697376 |
| Sult1a1 20887           | 1.017459148 | 0.459892068 | -1.178355344 | 0.128912129 |
| Sparcl1 13602           | 1.017452044 | 0.460676677 | 1.017452044  | 0.460676677 |
| Ndufs7 75406            | 1.017450057 | 0.458489881 | -1.088851664 | 0.291670128 |
| Rfwd3 234736            | 1.017411869 | 0.463362113 | 1.017290958  | 0.440911306 |
| Wdr26 226757            | 1.017404794 | 0.456018144 | 1.064381032  | 0.297754925 |
| Per1 18626              | 1.017364409 | 0.460473661 | 1.11914588   | 0.257209194 |
| Bcas2 68183             | 1.017309338 | 0.425055176 | 1.075656703  | 0.19249145  |
| Gpr98 110789            | 1.01729724  | 0.489150407 | -2.005626993 | 0.107561566 |
| Def8 23854              | 1.017262937 | 0.454115621 | 1.102938068  | 0.225626541 |
| Mta3 116871             | 1.017198773 | 0.448455351 | 1.017198773  | 0.448455351 |
| 2210403K04Rik 100042498 | 1.017095286 | 0.466192904 | -1.231070288 | 0.091865017 |
| Thumpd2 72167           | 1.017032677 | 0.485421598 | 1.017032677  | 0.485421598 |
| Gppb1 73274             | 1.017018816 | 0.44351683  | 1.017018816  | 0.44351683  |
| Abca8b 27404            | 1.016893973 | 0.478017775 | 1.278105321  | 0.191324937 |
| Fbxo7 69754             | 1.01681976  | 0.452820296 | 1.026158507  | 0.410479072 |
| Riok3 66878             | 1.016807236 | 0.40887415  | -1.033530626 | 0.290268618 |
| Timm50 66525            | 1.016785152 | 0.450553932 | -1.074575327 | 0.272053359 |
| Rangrf 57785            | 1.016767317 | 0.48638934  | 1.016767317  | 0.48638934  |
| Atp5g1 11951            | 1.016749935 | 0.467282182 | -1.142083193 | 0.221420126 |
| Zhx3 320799             | 1.016645312 | 0.467311168 | 1.016645312  | 0.467311168 |
| Ptdss2 27388            | 1.016619613 | 0.463717238 | 1.016619613  | 0.463717238 |
| Vps53 68299             | 1.016601495 | 0.419466599 | 1.112329568  | 0.041571044 |
| Serpina1c 20702         | 1.016575234 | 0.447024874 | -1.083926298 | 0.135734178 |
| Creld2 76737            | 1.016543769 | 0.480040558 | 1.292744859  | 0.023855555 |
| Crocc 230872            | 1.016522477 | 0.479166825 | -1.419839673 | 0.056296284 |
| Drap1 66556             | 1.016471085 | 0.465039173 | 1.013783548  | 0.462715375 |
| Tmem167 66074           | 1.016387275 | 0.424574735 | 1.080646333  | 0.104963624 |
| Fam26e 103511           | 1.016364976 | 0.491924933 | 1.195314368  | 0.428478238 |
| Ftcd 14317              | 1.016339044 | 0.440299634 | 1.016339044  | 0.440299634 |
| Mta1 116870             | 1.016329764 | 0.405344205 | 1.016329764  | 0.405344205 |
| Cntn2 21367             | 1.016328212 | 0.482802951 | 1.212398432  | 0.277251959 |
| Rsrc2 208606            | 1.016292175 | 0.476707333 | -1.13150072  | 0.334256829 |
| Cox7a2 12866            | 1.016275022 | 0.461397655 | -1.200845736 | 0.055650028 |
| Wdr85 67228             | 1.016123337 | 0.481498626 | 1.606754981  | 0.011207523 |
| 1110021L09Rik 76306     | 1.01598842  | 0.487222569 | 1.121204434  | 0.362056735 |
| 5430407P10Rik 227545    | 1.015965821 | 0.460074611 | 1.120143421  | 0.185017161 |
| Samd4b 233033           | 1.015934841 | 0.40902992  | 1.015934841  | 0.40902992  |
| Mettl5 75422            | 1.015930888 | 0.464428723 | 1.015930888  | 0.464428723 |
| Chek1 12649             | 1.01589854  | 0.491594667 | 1.784660662  | 0.257682973 |
| Tsfm 66399              | 1.01589764  | 0.467664154 | -1.167208333 | 0.125686256 |
| Ccdc99 70385            | 1.015877143 | 0.493760401 | 3.53972      | 0.173296754 |
| Plekha8 231999          | 1.015866009 | 0.461030925 | -1.053352238 | 0.378373784 |
| 2810002N01Rik 68020     | 1.015854098 | 0.439463805 | -1.03131394  | 0.383980574 |
| Lrrc14 223664           | 1.015790613 | 0.452483106 | -1.062335569 | 0.313130201 |
| Zufsp 72580             | 1.015753544 | 0.4905525   | -2.550426666 | 0.006602581 |
| Pomp 66537              | 1.015698261 | 0.450686776 | 1.112774252  | 0.100285588 |
| Srxn1 76650             | 1.015695598 | 0.455292599 | 1.158599983  | 0.060506765 |
| 2810459M11Rik 72792     | 1.015690411 | 0.403885517 | 1.015690411  | 0.403885517 |
| BC031353 235493         | 1.0156799   | 0.465169545 | -1.057439171 | 0.259823114 |

|                     |             |             |              |             |
|---------------------|-------------|-------------|--------------|-------------|
| Hook2 170833        | 1.015579804 | 0.425031271 | -1.040875473 | 0.261419831 |
| Pias4 59004         | 1.015526652 | 0.457918167 | 1.082355893  | 0.28553276  |
| Slc41a1 98396       | 1.015482232 | 0.473961852 | 1.290790607  | 0.101719432 |
| P2ry1 18441         | 1.015470422 | 0.465403525 | 1.111213594  | 0.278694233 |
| Ppt2 54397          | 1.015439538 | 0.421812357 | 1.052936682  | 0.244595992 |
| Zfp235 56525        | 1.015422801 | 0.48099469  | -1.26825072  | 0.202888759 |
| Ecd 70601           | 1.015325418 | 0.454360067 | -1.048006622 | 0.353348062 |
| Ppp1r12c 232807     | 1.015225325 | 0.449542454 | 1.070595631  | 0.27556142  |
| Tuba1c 22146        | 1.015210745 | 0.46420639  | -1.085274339 | 0.271429978 |
| Rcl1 59028          | 1.015201024 | 0.450033613 | -1.056652389 | 0.312570377 |
| Ndufa8 68375        | 1.015071658 | 0.448415767 | 1.015071658  | 0.448415767 |
| Egflam 268780       | 1.0150645   | 0.489557842 | -1.378503281 | 0.308946836 |
| Mt2 17750           | 1.015032873 | 0.478746885 | 1.015032873  | 0.478746885 |
| Apold1 381823       | 1.014985278 | 0.488817955 | 1.53255533   | 0.221283047 |
| Uxt 22294           | 1.014967062 | 0.479122771 | -1.177019735 | 0.218296501 |
| Usp49 224836        | 1.014959775 | 0.490109336 | -1.6339871   | 0.21713774  |
| Slc3a1 20532        | 1.014879378 | 0.479397398 | -1.034542899 | 0.444623618 |
| Hscb 100900         | 1.01475245  | 0.484857208 | -1.509174339 | 0.02864394  |
| Rsu1 20163          | 1.014705922 | 0.467889647 | 1.142682325  | 0.21439893  |
| Il18bp 16068        | 1.014661098 | 0.474422488 | -1.140135803 | 0.270896604 |
| Eif3l 223691        | 1.014623706 | 0.439063726 | 1.043211037  | 0.334500695 |
| Tppp 72948          | 1.0145651   | 0.482429555 | 1.503591803  | 0.054055554 |
| Bpgm 12183          | 1.014494967 | 0.457944359 | -1.063394866 | 0.319993699 |
| Acbd6 72482         | 1.014488554 | 0.463656538 | -1.077703294 | 0.28907919  |
| Tmem204 407831      | 1.014420875 | 0.461040802 | 1.055867884  | 0.366814458 |
| Rab3gap2 98732      | 1.01440573  | 0.468139497 | -1.093923929 | 0.272878777 |
| Yars 107271         | 1.014302292 | 0.465563205 | 1.014302292  | 0.465563205 |
| Kif21a 16564        | 1.014283979 | 0.482296794 | 1.298591092  | 0.186324138 |
| Hspa14 50497        | 1.01424738  | 0.471135661 | -1.23082755  | 0.082667166 |
| Fam176a 232146      | 1.014218469 | 0.451729651 | 1.066207706  | 0.285370982 |
| Shkbp1 192192       | 1.014216672 | 0.457367757 | 1.081248777  | 0.261824899 |
| C1qa 12259          | 1.014098047 | 0.473583641 | -1.016424092 | 0.461627355 |
| Trim39 79263        | 1.014045486 | 0.462811698 | 1.014045486  | 0.462811698 |
| Tifa 211550         | 1.013999606 | 0.454698707 | -1.076824849 | 0.231745062 |
| Wdr31 71354         | 1.013892893 | 0.494840415 | 1            | #DIV/0!     |
| Dab1 13131          | 1.013892893 | 0.494840415 | 1            | #DIV/0!     |
| Mcrs1 51812         | 1.013818826 | 0.471866441 | 1.013818826  | 0.471866441 |
| Becn1 56208         | 1.013806188 | 0.454329509 | 1.051824862  | 0.347545197 |
| Orai3 269999        | 1.013792366 | 0.446273895 | 1.013792366  | 0.446273895 |
| Efhd1 98363         | 1.013766529 | 0.492401929 | -1.762234392 | 0.245786637 |
| Uhrf2 109113        | 1.013732938 | 0.467155592 | 1.062327114  | 0.281253371 |
| Fbxo11 225055       | 1.013703741 | 0.486825169 | 1.149827282  | 0.365148416 |
| Npm3 18150          | 1.013671641 | 0.470487541 | 1.105381786  | 0.276848154 |
| Ran 19384           | 1.013661321 | 0.417574738 | -1.007446223 | 0.457141065 |
| 1810030N24Rik 66291 | 1.013649402 | 0.468738871 | -1.110428411 | 0.247540441 |
| Rab3ip 216363       | 1.013596032 | 0.428765789 | 1.013596032  | 0.428765789 |
| Pja2 224938         | 1.013576914 | 0.481011029 | 1.013330528  | 0.477715336 |
| Nsf 18195           | 1.013508231 | 0.469742536 | 1.013508231  | 0.469742536 |
| Nat10 98956         | 1.013436515 | 0.462680693 | -1.010225419 | 0.465657688 |
| Ppp1r16b 228852     | 1.0131421   | 0.480165548 | 1.222828644  | 0.203939333 |
| Prdm10 382066       | 1.013141542 | 0.490901655 | 1.429213653  | 0.290484699 |
| Zfp810 235050       | 1.012999361 | 0.486879728 | -1.088445091 | 0.416098649 |
| Napb 17957          | 1.012962752 | 0.489183329 | -1.409240487 | 0.238529812 |



|                      |             |             |              |             |
|----------------------|-------------|-------------|--------------|-------------|
| Tmem149 101883       | 1.012959265 | 0.486489745 | 1.320645605  | 0.162041805 |
| Zfp941 407812        | 1.012958975 | 0.492276972 | 1.012958975  | 0.492276972 |
| Bms1 213895          | 1.012957917 | 0.464759982 | 1.142226063  | 0.111555106 |
| Ppp1cb 19046         | 1.012930887 | 0.470275523 | 1.233033611  | 0.058866791 |
| Eif4a2 13682         | 1.012925838 | 0.47599065  | 1.012925838  | 0.47599065  |
| Pink1 68943          | 1.012902193 | 0.451775745 | 1.012902193  | 0.451775745 |
| Tapt1 231225         | 1.012870909 | 0.47722768  | 1.139429594  | 0.250254174 |
| 2410003K15Rik 75593  | 1.012866435 | 0.467501801 | -1.01973858  | 0.429998776 |
| Apoc4 11425          | 1.012865934 | 0.477650112 | 1.003886348  | 0.491031811 |
| Slc18a1 110877       | 1.012849949 | 0.479960032 | 1.015325378  | 0.46027234  |
| Wdfy2 268752         | 1.012832873 | 0.493825867 | 3.836820084  | 0.036982216 |
| Ddost 13200          | 1.012823935 | 0.439174417 | 1.066808366  | 0.197034363 |
| Zfp60 22718          | 1.012811726 | 0.485973474 | 1.212197348  | 0.265160197 |
| C030046E11Rik 226089 | 1.01271148  | 0.486730672 | 1.407737373  | 0.153717648 |
| Nedd4l 83814         | 1.012701593 | 0.459022762 | 1.012701593  | 0.459022762 |
| Hs3st3b1 54710       | 1.012616131 | 0.469885548 | -1.066413967 | 0.339113184 |
| Pfkfb4 270198        | 1.012606423 | 0.493667059 | -1.501130924 | 0.326323118 |
| Mpeg1 17476          | 1.012599161 | 0.480704388 | -1.153900573 | 0.287899276 |
| 1810043H04Rik 208501 | 1.012506912 | 0.473697281 | 1.022943194  | 0.429615548 |
| Traf6 22034          | 1.012398629 | 0.48153359  | 1.012398629  | 0.48153359  |
| Sla 20491            | 1.012358845 | 0.489009811 | -1.048930827 | 0.456221966 |
| Gpank1 81845         | 1.012358384 | 0.478332199 | -1.298839288 | 0.047756426 |
| Slc11a2 18174        | 1.012331183 | 0.473009294 | 1.094895559  | 0.249298255 |
| Foxo1 56458          | 1.012262427 | 0.47259142  | 1.012262427  | 0.47259142  |
| Ndufb7 66916         | 1.01225036  | 0.473311266 | -1.12546316  | 0.226549497 |
| Peo1 226153          | 1.012230121 | 0.435644881 | -1.020705259 | 0.389671031 |
| Zzz3 108946          | 1.012199577 | 0.458669698 | -1.133034319 | 0.014089444 |
| Slfm2 20556          | 1.012178053 | 0.475893488 | -1.164089988 | 0.16351753  |
| Zfp639 67778         | 1.012091911 | 0.48139506  | 1.160151717  | 0.213298931 |
| Camk2d 108058        | 1.012076782 | 0.483610288 | 1.012076782  | 0.483610288 |
| Bsg 12215            | 1.012072513 | 0.460265217 | -1.148245608 | 0.02878425  |
| Eme2 193838          | 1.011894034 | 0.471348507 | -1.044747357 | 0.396097109 |
| Col4a3bp 68018       | 1.011885399 | 0.464676174 | 1.076656763  | 0.294082613 |
| 2310022B05Rik 69551  | 1.011762221 | 0.463681059 | -1.071905982 | 0.275668129 |
| Entpd4 67464         | 1.011730061 | 0.444314998 | -1.081476218 | 0.119211247 |
| Sirt5 68346          | 1.011594143 | 0.477416316 | 1.133442596  | 0.268941542 |
| Snrpb2 20639         | 1.011492103 | 0.461825092 | -1.054478841 | 0.308270271 |
| Plrg1 53317          | 1.01139229  | 0.473410391 | -1.123311866 | 0.20377911  |
| Smox 228608          | 1.011314226 | 0.48133497  | 1.011314226  | 0.48133497  |
| Nop14 75416          | 1.011267989 | 0.428231434 | 1.051645243  | 0.164846457 |
| Qpctl 67369          | 1.011231165 | 0.458724957 | 1.049260635  | 0.26067872  |
| Amfr 23802           | 1.011218611 | 0.465335942 | 1.090739598  | 0.210640884 |
| Tmed7 66676          | 1.011206028 | 0.479501347 | 1.10071771   | 0.340037586 |
| Utrn 22288           | 1.01120308  | 0.486710845 | 1.478400963  | 0.080852457 |
| Dpm2 13481           | 1.011172267 | 0.46684672  | 1.011172267  | 0.46684672  |
| Isoc2a 664994        | 1.011164798 | 0.465132126 | -1.053142578 | 0.341345581 |
| Filip1l 78749        | 1.011090083 | 0.486170289 | 1.312315586  | 0.16488001  |
| Atrnl1 226255        | 1.011077575 | 0.484090908 | 1.388274764  | 0.058800688 |
| Exoc8 102058         | 1.01101019  | 0.470405438 | 1.039151021  | 0.366666103 |
| Mrps28 66230         | 1.010910359 | 0.477115687 | 1.009275755  | 0.476162226 |
| Kif26b 269152        | 1.010899474 | 0.494239965 | 1.797535714  | 0.255240005 |
| Klc1 16593           | 1.010874319 | 0.472352192 | -1.081689731 | 0.276191058 |
| Baiap2 108100        | 1.010799243 | 0.445295679 | -1.039395095 | 0.272971972 |

|                     |             |             |              |             |
|---------------------|-------------|-------------|--------------|-------------|
| Gatsl3 71962        | 1.010727941 | 0.48437803  | 1.010727941  | 0.48437803  |
| Cox5b 12859         | 1.010641575 | 0.47108057  | 1.014431184  | 0.439272412 |
| Prox2 73422         | 1.010570435 | 0.486698505 | 1.211027289  | 0.278458986 |
| Rnf149 67702        | 1.010569644 | 0.460621666 | 1.0796703    | 0.189972933 |
| Nhlrc3 212114       | 1.010531918 | 0.49003898  | 1.081633     | 0.414668405 |
| Cirh1a 21771        | 1.010510507 | 0.474169996 | 1.102321458  | 0.271930433 |
| Phf21a 192285       | 1.010467214 | 0.463258449 | -1.035432679 | 0.383385723 |
| Baiap2l1 66898      | 1.010401571 | 0.469984537 | 1.010401571  | 0.469984537 |
| Dysf 26903          | 1.010394323 | 0.477991306 | -1.10214317  | 0.297370164 |
| Ss18 268996         | 1.010252597 | 0.472392944 | 1.065393688  | 0.300413033 |
| Otud6b 72201        | 1.010248513 | 0.48558237  | 1.269619466  | 0.162446502 |
| Josd2 66124         | 1.010232129 | 0.477758675 | 1.010232129  | 0.477758675 |
| Polrmt 216151       | 1.010160432 | 0.441430593 | -1.011950801 | 0.412696895 |
| Tmem109 68539       | 1.010143333 | 0.469380308 | -1.075703224 | 0.243116456 |
| Dhdds 67422         | 1.01010982  | 0.465826763 | 1.158076712  | 0.041364505 |
| Slc48a1 67739       | 1.010108576 | 0.462268763 | -1.034429237 | 0.378765363 |
| Rhoa 11848          | 1.010099234 | 0.445515404 | -1.015024855 | 0.392693111 |
| Zfp568 243905       | 1.010085238 | 0.486081761 | 1.114392739  | 0.22592233  |
| Rrp36 224823        | 1.009975139 | 0.462427478 | -1.057398141 | 0.278879441 |
| Fbln1 14114         | 1.009930522 | 0.491309782 | 1.163097969  | 0.384883335 |
| Mark3 17169         | 1.009901306 | 0.462433949 | -1.070757491 | 0.203172992 |
| Dnajb2 56812        | 1.009894617 | 0.465525793 | -1.078469556 | 0.201101993 |
| Prr15l 217138       | 1.009880813 | 0.493232699 | 1.315818981  | 0.34111768  |
| Gpd1l 333433        | 1.009865576 | 0.473552106 | -1.035893179 | 0.412718223 |
| 1700029F09Rik 75623 | 1.009799331 | 0.48951019  | -1.225168737 | 0.301004293 |
| Igfbp4 16010        | 1.009769549 | 0.456474502 | -1.095271088 | 0.086612097 |
| Zfp277 246196       | 1.009739165 | 0.488317103 | -1.259744876 | 0.230311121 |
| Ddx39b 53817        | 1.00971216  | 0.443246302 | -1.070498887 | 0.068269535 |
| Ypel3 66090         | 1.009707092 | 0.471588945 | 1.026139925  | 0.382229005 |
| Klh122 224023       | 1.009693589 | 0.476995871 | 1.123309736  | 0.228356622 |
| Tyrobp 22177        | 1.009571811 | 0.481317024 | -1.049086943 | 0.39283632  |
| Cd14 12475          | 1.009536128 | 0.48560033  | 1.139764975  | 0.277333574 |
| Plekha3 83435       | 1.009480396 | 0.482469199 | 1.169613391  | 0.214214508 |
| Ccbl2 229905        | 1.009455942 | 0.471968443 | 1.045227856  | 0.311362517 |
| Tmem177 66343       | 1.009446463 | 0.478775152 | -1.08864154  | 0.291356643 |
| Slc16a9 66859       | 1.009431647 | 0.488533495 | -1.056979812 | 0.435814355 |
| Adamts1 11504       | 1.009349241 | 0.489431619 | 1.009349241  | 0.489431619 |
| Plxn1 235611        | 1.009286665 | 0.467410047 | 1.002913202  | 0.485380904 |
| Ppil2 66053         | 1.009187671 | 0.47628159  | 1.009187671  | 0.47628159  |
| Ubtfl 21429         | 1.009144338 | 0.421322914 | 1.041824555  | 0.124994903 |
| Chac2 68044         | 1.00914126  | 0.479294682 | -1.06377086  | 0.369019704 |
| Eif4ebp1 13685      | 1.009124922 | 0.475181805 | -1.096766448 | 0.188517669 |
| Thumpd1 233802      | 1.009121754 | 0.477831872 | -1.053944123 | 0.372540545 |
| Hdac1 433759        | 1.009096219 | 0.47979786  | 1.009096219  | 0.47979786  |
| Rap1a 109905        | 1.009054131 | 0.482868244 | -1.106301304 | 0.317242309 |
| Ogfod2 66627        | 1.009015352 | 0.479254475 | -1.108059907 | 0.259122166 |
| Zbtb41 226470       | 1.008993822 | 0.489232376 | 1.298605593  | 0.198849459 |
| Erlin2 244373       | 1.008989616 | 0.47639675  | -1.074464468 | 0.314985732 |
| Ttf1 22130          | 1.008861099 | 0.485771342 | 1.168371381  | 0.212600019 |
| AW549877 106064     | 1.008853695 | 0.487950103 | 1.292226372  | 0.14475601  |
| Slc25a11 67863      | 1.00884277  | 0.45086951  | -1.023056841 | 0.375647259 |
| Exosc10 50912       | 1.008788448 | 0.471761477 | 1.081178004  | 0.256833572 |
| Pdcl 67466          | 1.008683029 | 0.489807825 | 1.008683029  | 0.489807825 |

|                      |             |             |              |             |
|----------------------|-------------|-------------|--------------|-------------|
| Elf2 69257           | 1.008650672 | 0.489008338 | 1.242678911  | 0.239658601 |
| Polr2g 67710         | 1.008578796 | 0.476957769 | 1.008578796  | 0.476957769 |
| Tspan7 21912         | 1.008562086 | 0.475193824 | -1.004290905 | 0.481802375 |
| Trip12 14897         | 1.008478536 | 0.475899972 | 1.176375203  | 0.069359948 |
| Clmn 94040           | 1.008475816 | 0.457647967 | 1.008475816  | 0.457647967 |
| Snx11 74479          | 1.008449751 | 0.476876996 | 1.007469565  | 0.464483512 |
| Rfc2 19718           | 1.008404997 | 0.486167362 | 1.047094493  | 0.358000453 |
| Eef2 13629           | 1.008381897 | 0.466393133 | -1.044720571 | 0.324593304 |
| Ppm1m 67905          | 1.008314127 | 0.478234244 | -1.085658124 | 0.256036895 |
| Vps26a 30930         | 1.008265955 | 0.47689476  | -1.103638549 | 0.195861698 |
| Rnf39 386454         | 1.008154457 | 0.488221345 | 1.354759509  | 0.098654852 |
| Peg13 353342         | 1.008141043 | 0.476986055 | 1.099184134  | 0.236420155 |
| Ephx1 13849          | 1.008103223 | 0.47918222  | 1.144806128  | 0.123220217 |
| Klra2 16633          | 1.008040439 | 0.489940803 | 1.008040439  | 0.489940803 |
| Fam108c 70178        | 1.008022931 | 0.479154367 | 1.122779514  | 0.192817381 |
| Atad1 67979          | 1.008012863 | 0.486943338 | 1.107432441  | 0.20123543  |
| Tsta3 22122          | 1.008004202 | 0.478720972 | 1.133633782  | 0.144729449 |
| Eif3d 55944          | 1.00792612  | 0.477892299 | 1.00792612   | 0.477892299 |
| Ncaph2 52683         | 1.007891672 | 0.469185441 | -1.047321399 | 0.319509977 |
| Skiv2 108077         | 1.007885873 | 0.46335611  | 1.007885873  | 0.46335611  |
| Chd6 71389           | 1.007877478 | 0.487617381 | 1.332045002  | 0.078712095 |
| Rilp 280408          | 1.007838306 | 0.483401833 | -1.230558896 | 0.069995126 |
| Coq4 227683          | 1.007734183 | 0.48411179  | -1.216810605 | 0.090970757 |
| Gdi2 14569           | 1.007728169 | 0.464337354 | -1.037769489 | 0.254999179 |
| Exosc7 66446         | 1.007632921 | 0.469568901 | -1.034233587 | 0.365418974 |
| Tbc1d22a 223754      | 1.0075924   | 0.480058568 | 1.0075924    | 0.480058568 |
| Cybb 13058           | 1.007535173 | 0.483911274 | -1.075467199 | 0.34045947  |
| Ptpn4 19258          | 1.007493161 | 0.496031655 | 1.784660662  | 0.257682973 |
| Dazap1 70248         | 1.007389668 | 0.473096074 | 1.139869316  | 0.046369124 |
| C2 12263             | 1.007361898 | 0.482510261 | -1.16975141  | 0.027615773 |
| 5930434B04Rik 381356 | 1.007360463 | 0.472176438 | 1.063448543  | 0.236221414 |
| Col6a2 12834         | 1.007346654 | 0.491129678 | -1.181238318 | 0.14805545  |
| 1110067D22Rik 216551 | 1.007314594 | 0.480110336 | 1.050329843  | 0.373109246 |
| Gadd45a 13197        | 1.007312829 | 0.492362937 | 1.007312829  | 0.492362937 |
| Acap2 78618          | 1.007216713 | 0.492700572 | -1.02027764  | 0.466355918 |
| Ube2h 22214          | 1.00719926  | 0.469337624 | 1.054014334  | 0.274142698 |
| Mrpl19 56284         | 1.007153399 | 0.486303431 | 1.257187039  | 0.078168702 |
| Thap7 69009          | 1.007145738 | 0.484060335 | -1.231140124 | 0.035607578 |
| Eif2a 229317         | 1.007074653 | 0.462795576 | -1.089931276 | 0.018332413 |
| Snhg1 83673          | 1.00702157  | 0.490444801 | 1.165787395  | 0.271958275 |
| Utp3 65961           | 1.006997727 | 0.476566258 | 1.006997727  | 0.476566258 |
| Ppargc1a 19017       | 1.006967909 | 0.493334816 | -1.136378123 | 0.352202139 |
| Grpel1 17713         | 1.006961816 | 0.466073069 | 1.016967326  | 0.395598594 |
| Hspb2 69253          | 1.006957827 | 0.496085219 | -1.23872035  | 0.390455289 |
| Prpf4b 19134         | 1.006935593 | 0.492008468 | 1.113924706  | 0.330611429 |
| Prpf6 68879          | 1.006903895 | 0.470325997 | -1.016501278 | 0.404745967 |
| Ngfrap1 12070        | 1.006873833 | 0.484676305 | -1.097672598 | 0.297193069 |
| Gm12216 622459       | 1.006828386 | 0.496118085 | 1.481669861  | 0.318085772 |
| Cdk2ap2 52004        | 1.006820387 | 0.488414342 | 1.021763717  | 0.445113121 |
| Ldlrad3 241576       | 1.006758773 | 0.487724332 | 1.208203403  | 0.136593573 |
| Thy1 21838           | 1.006751641 | 0.485230883 | 1.006751641  | 0.485230883 |
| Usp7 252870          | 1.006744766 | 0.478358802 | -1.158985578 | 0.024414827 |
| Phospho2 73373       | 1.006700616 | 0.484943515 | -1.125912132 | 0.221687169 |

|                      |             |             |              |             |
|----------------------|-------------|-------------|--------------|-------------|
| Anp32e 66471         | 1.006682319 | 0.481902113 | 1.174427709  | 0.080695173 |
| lpmk 69718           | 1.00665063  | 0.47633859  | -1.058759089 | 0.295105461 |
| lgf2r 16004          | 1.006539595 | 0.485514991 | -1.082674244 | 0.315005643 |
| Gtf3c4 269252        | 1.006537729 | 0.487462722 | 1.177379746  | 0.179289713 |
| Manea 242362         | 1.006448761 | 0.4909229   | -1.228168133 | 0.209728986 |
| Aspdh 68352          | 1.006328382 | 0.483775543 | 1.022176745  | 0.431558928 |
| Gys2 232493          | 1.006226809 | 0.482434227 | -1.00421624  | 0.486352538 |
| Ldb1 16825           | 1.006162487 | 0.477710855 | 1.006162487  | 0.477710855 |
| Ugt3a2 223337        | 1.006155083 | 0.47598166  | -1.06955871  | 0.210341758 |
| Tada2a 217031        | 1.006145572 | 0.490779914 | 1.00341008   | 0.491260233 |
| Hyal2 15587          | 1.006145218 | 0.474449328 | 1.038872812  | 0.348742827 |
| Pex5 19305           | 1.006136258 | 0.48133664  | 1.08976541   | 0.211519859 |
| Dio3 107585          | 1.006124474 | 0.496334442 | -1.659963261 | 0.249112461 |
| Klf16 118445         | 1.006116118 | 0.487196522 | 1.007942077  | 0.480130229 |
| Nploc4 217365        | 1.005982734 | 0.473245259 | -1.043774864 | 0.306801684 |
| Ogdh 18293           | 1.0059289   | 0.448515321 | 1.0059289    | 0.448515321 |
| Rnf4 19822           | 1.005923815 | 0.485360733 | 1.105539749  | 0.226799787 |
| Rad9 19367           | 1.005895776 | 0.490407449 | 1.005895776  | 0.490407449 |
| Llph 66225           | 1.005886683 | 0.484243257 | -1.076096406 | 0.308496462 |
| Ostf1 20409          | 1.005846721 | 0.474774543 | 1.005846721  | 0.474774543 |
| 1810009A15Rik 66276  | 1.005830337 | 0.486707767 | 1.005830337  | 0.486707767 |
| Obfc2a 109019        | 1.005828343 | 0.494224615 | 1.279370062  | 0.244543196 |
| Sf3b2 319322         | 1.005747085 | 0.4746881   | 1.120913263  | 0.025981127 |
| Ttl 69737            | 1.00569798  | 0.489401515 | 1.154376795  | 0.183667691 |
| Man1a2 17156         | 1.005658298 | 0.471674978 | 1.035372099  | 0.338411794 |
| Xpot 73192           | 1.005650129 | 0.487447702 | 1.004001773  | 0.489587366 |
| Urod 22275           | 1.005513578 | 0.487510767 | 1.038802498  | 0.382325508 |
| Klf6 23849           | 1.005504735 | 0.490274068 | 1.273308795  | 0.109814205 |
| Hba-a2 110257        | 1.00547755  | 0.494091586 | -1.249343404 | 0.279007734 |
| Atox1 11927          | 1.005465796 | 0.488826582 | 1.070440347  | 0.325800728 |
| Eif3b 27979          | 1.005376178 | 0.480330044 | 1.005376178  | 0.480330044 |
| Psm1 70247           | 1.005313196 | 0.480790467 | -1.057534781 | 0.297859782 |
| Csnk1e 27373         | 1.00520531  | 0.490496394 | 1.024990117  | 0.433234388 |
| Nuak2 74137          | 1.005168273 | 0.487911815 | 1.005168273  | 0.487911815 |
| 5730469M10Rik 70564  | 1.004839999 | 0.48447497  | -1.077865113 | 0.25142213  |
| Slnf5 327978         | 1.004792071 | 0.489701331 | 1.113623021  | 0.278942225 |
| Atp5j 11957          | 1.004780567 | 0.477378959 | 1.065420055  | 0.185539963 |
| Dynlt3 67117         | 1.004740358 | 0.488603796 | -1.073658835 | 0.338586925 |
| Crb3 224912          | 1.004714101 | 0.482442579 | -1.074277647 | 0.173089033 |
| Znhit1 70103         | 1.004712859 | 0.489784008 | 1.030880594  | 0.42270676  |
| Pcdh1 75599          | 1.004637443 | 0.483468813 | -1.056850013 | 0.289938321 |
| Tmem88 67020         | 1.004591809 | 0.495079743 | -1.196105042 | 0.281050278 |
| Naa35 78689          | 1.004546678 | 0.488398295 | -1.05206281  | 0.380351132 |
| Tmem191c 224019      | 1.004405143 | 0.492673712 | -1.089616673 | 0.328225283 |
| 4930402H24Rik 228602 | 1.004334708 | 0.495724882 | 1.168685064  | 0.299246196 |
| lft20 55978          | 1.004205003 | 0.487551558 | 1.042652002  | 0.38290975  |
| Lmln 239833          | 1.004202025 | 0.49769512  | -2.043390563 | 0.184333064 |
| ltgav 16410          | 1.00419945  | 0.49181907  | -1.058149377 | 0.393463274 |
| Wdr7 104082          | 1.004154987 | 0.493588465 | 1.156355835  | 0.290973033 |
| Pik3r2 18709         | 1.004108931 | 0.485817931 | 1.144929488  | 0.054629037 |
| Dnaja2 56445         | 1.00402132  | 0.49045019  | 1.008552025  | 0.476826723 |
| Cfl1 12631           | 1.003964003 | 0.488444617 | -1.077629425 | 0.283584716 |
| Trpc6 22068          | 1.003935941 | 0.492888974 | -1.040964609 | 0.406375976 |

|                      |             |             |              |             |
|----------------------|-------------|-------------|--------------|-------------|
| Vopp1 232023         | 1.003932589 | 0.494889984 | -1.045570401 | 0.435469066 |
| Zwilch 68014         | 1.003868108 | 0.497937416 | -2.600054995 | 0.091584858 |
| A230051G13Rik 216792 | 1.003852714 | 0.489890846 | -1.104710598 | 0.229263892 |
| Fgb 110135           | 1.003813801 | 0.490125876 | -1.100968559 | 0.207602062 |
| Stab2 192188         | 1.003692711 | 0.482015302 | 1.003692711  | 0.482015302 |
| Dsp 109620           | 1.003678009 | 0.495377636 | 1.279889215  | 0.197220744 |
| Rpf2 67239           | 1.00367057  | 0.494788079 | 1.00367057   | 0.494788079 |
| Coq10b 67876         | 1.003594846 | 0.491346623 | -1.111217844 | 0.241943655 |
| Mrpl22 216767        | 1.003553514 | 0.489411877 | -1.036284858 | 0.320272242 |
| Pa2g4 18813          | 1.003511108 | 0.486403337 | 1.120811197  | 0.081240179 |
| Hbs1l 56422          | 1.003504094 | 0.486975404 | 1.127802426  | 0.081276901 |
| Pfn1 18643           | 1.003416433 | 0.49233217  | -1.222214513 | 0.0679824   |
| Aldoart1 353204      | 1.003409033 | 0.498458011 | 3.852678571  | 0.080253065 |
| Hsd17b4 15488        | 1.003397964 | 0.491587831 | 1.101102743  | 0.238240504 |
| Mfsd11 69900         | 1.003371038 | 0.491535162 | 1.009590598  | 0.463236464 |
| Fam168a 319604       | 1.003337529 | 0.493150938 | 1.086985827  | 0.267090714 |
| Cd180 17079          | 1.003321238 | 0.497927592 | -1.561907297 | 0.215130811 |
| 1190005F20Rik 98685  | 1.00328404  | 0.488820718 | 1.074234768  | 0.23636237  |
| Ly6e 17069           | 1.003279096 | 0.49452265  | -1.261097323 | 0.047122837 |
| Canx 12330           | 1.003251182 | 0.487079051 | 1.051828653  | 0.308444253 |
| Rft1 328370          | 1.003226696 | 0.490970287 | -1.022330423 | 0.382447916 |
| Nr1h4 20186          | 1.003155114 | 0.490016611 | 1.003155114  | 0.490016611 |
| Surf1 20930          | 1.003140028 | 0.492649463 | -1.084150404 | 0.17605069  |
| Egln2 112406         | 1.003128442 | 0.491377735 | -1.115623155 | 0.168288562 |
| Eif3h 68135          | 1.003125668 | 0.484407813 | -1.062584528 | 0.103084129 |
| E4f1 13560           | 1.003086605 | 0.495150928 | 1.139375826  | 0.278596551 |
| Pydc4 623121         | 1.003004119 | 0.498283018 | 1.652436434  | 0.267702974 |
| 2310047B19Rik 66962  | 1.002992663 | 0.493562506 | 1.0099554    | 0.470905862 |
| Nudt1 17766          | 1.002991899 | 0.493469077 | 1.066887807  | 0.362277422 |
| Ube2d3 66105         | 1.002980529 | 0.492265376 | -1.096148081 | 0.261498596 |
| Lym5 67636           | 1.002920344 | 0.492631118 | -1.191914103 | 0.073391888 |
| Tfec 21426           | 1.002890194 | 0.495809217 | -1.081692648 | 0.375873312 |
| Tsn 22099            | 1.002831188 | 0.492131078 | 1.095439383  | 0.248348788 |
| Dck 13178            | 1.002802671 | 0.497847697 | -1.476381935 | 0.2357447   |
| Rbm18 67889          | 1.002778589 | 0.495099373 | 1.182427459  | 0.2021954   |
| Mocs2 17434          | 1.002738357 | 0.487612442 | -1.047902701 | 0.287441014 |
| Dnase2b 56629        | 1.002693002 | 0.493323511 | 1.002693002  | 0.493323511 |
| Vwa3a 233813         | 1.002688635 | 0.498820915 | -3.967316667 | 0.09324139  |
| Ii7 16196            | 1.002688635 | 0.498820915 | -3.967316667 | 0.09324139  |
| Catsperg1 320225     | 1.002688635 | 0.498820915 | -3.967316667 | 0.09324139  |
| Tnfsf9 21950         | 1.002688635 | 0.498820915 | -3.967316667 | 0.09324139  |
| Sh2d4b 328381        | 1.002688635 | 0.498820915 | -3.967316667 | 0.09324139  |
| Ubash3a 328795       | 1.002688635 | 0.498820915 | -3.967316667 | 0.09324139  |
| Ubac2 68889          | 1.002654316 | 0.488860272 | 1.07385624   | 0.18039722  |
| Wbscr22 66138        | 1.002641708 | 0.492473709 | -1.168260072 | 0.056594893 |
| Fam73b 108958        | 1.002571295 | 0.4942189   | -1.065283644 | 0.30333315  |
| Gm5088 328451        | 1.002565553 | 0.490694642 | 1.031995641  | 0.360985824 |
| Erg 13876            | 1.002516996 | 0.497827603 | 1.075569681  | 0.439969022 |
| Mzt1 76789           | 1.002465381 | 0.496257341 | -1.144127225 | 0.309914371 |
| Magt1 67075          | 1.002366879 | 0.489778409 | 1.057494066  | 0.242018294 |
| Dnajb11 67838        | 1.002341737 | 0.493217774 | 1.111265577  | 0.174459237 |
| Psmc3 19182          | 1.002303136 | 0.492582727 | -1.042346759 | 0.376155689 |
| Timm9 30056          | 1.002207325 | 0.493569499 | 1.101662481  | 0.208700293 |

|                      |             |             |              |             |
|----------------------|-------------|-------------|--------------|-------------|
| Cmas 12764           | 1.002163527 | 0.48673654  | -1.015421972 | 0.411873777 |
| Sik1 17691           | 1.002160479 | 0.496570861 | 1.002160479  | 0.496570861 |
| Mpzl3 319742         | 1.00213223  | 0.499069061 | 1.195314368  | 0.428478238 |
| Gabpa 14390          | 1.002116394 | 0.49629809  | 1.345439486  | 0.01320468  |
| Rnf130 59044         | 1.001823932 | 0.4924701   | 1.03634055   | 0.36342197  |
| Smcr7 237781         | 1.001814272 | 0.494891624 | 1.001814272  | 0.494891624 |
| B3gnt1 108902        | 1.001791893 | 0.495413283 | 1.060966299  | 0.360606941 |
| Nphp1 53885          | 1.001773603 | 0.497044137 | 1.176825882  | 0.234316061 |
| Elf1 13709           | 1.001628828 | 0.497723265 | 1.308109443  | 0.094720912 |
| Zfp385b 241494       | 1.001483439 | 0.497280143 | 1.023778709  | 0.44606459  |
| Cant1 76025          | 1.001471443 | 0.493940061 | -1.018474685 | 0.379959568 |
| Gcn1l1 231659        | 1.001465607 | 0.489445466 | -1.026606334 | 0.313394799 |
| Faim 23873           | 1.001399122 | 0.498031611 | -1.143192731 | 0.297713682 |
| Skil 20482           | 1.001336604 | 0.498704636 | -1.098162335 | 0.382873896 |
| Dcaf10 242418        | 1.001329415 | 0.497064733 | -1.136957601 | 0.207253081 |
| Eml2 72205           | 1.00131708  | 0.497169194 | 1.111296841  | 0.250788047 |
| 2310035K24Rik 69596  | 1.001315849 | 0.496253031 | 1.001315849  | 0.496253031 |
| Msl2 77853           | 1.0013147   | 0.497950636 | 1.0013147    | 0.497950636 |
| Ccdc117 104479       | 1.001272655 | 0.496648339 | 1.018822685  | 0.407038404 |
| Igbp1 18518          | 1.00126816  | 0.495230551 | -1.05528137  | 0.288650125 |
| Tmem219 68742        | 1.001219863 | 0.497219703 | -1.002145969 | 0.493266267 |
| Rfc1 19687           | 1.001187046 | 0.497304539 | 1.009562201  | 0.47151272  |
| Wbp7 75410           | 1.001182454 | 0.49708758  | 1.134326727  | 0.168474055 |
| Ebp 13595            | 1.001170599 | 0.49498382  | -1.107876208 | 0.073639452 |
| Atp1a1 11928         | 1.000825116 | 0.495409301 | 1.057735946  | 0.115461362 |
| Vat1 26949           | 1.000801008 | 0.496887478 | 1.053879172  | 0.302892666 |
| Gpn1 74254           | 1.000767821 | 0.498173037 | 1.104407576  | 0.269372846 |
| Nkrf 77286           | 1.000597505 | 0.499569044 | 1.000597505  | 0.499569044 |
| Mkl2 239719          | 1.00053492  | 0.499335841 | 1.00053492   | 0.499335841 |
| Hibch 227095         | 1.000505463 | 0.498671211 | 1.077505787  | 0.31378782  |
| Rbms1 56878          | 1.000499782 | 0.499587368 | 1.467420972  | 0.214228303 |
| Ppig 228005          | 1.00031052  | 0.498434902 | -1.017696387 | 0.369424557 |
| Sel1 20338           | 1.000281742 | 0.499333782 | 1.003178045  | 0.492538965 |
| Myg1 60315           | 1.000274793 | 0.499244102 | 1.096256272  | 0.246349852 |
| Ndufb8 67264         | 1.000194634 | 0.499352391 | -1.067309241 | 0.269759327 |
| Hmgn1 15312          | 1.000192624 | 0.499067924 | -1.042153066 | 0.295256168 |
| Gadd45gip1 102060    | 1.000191723 | 0.499684132 | -1.175405635 | 0.239654177 |
| Slc35e1 270066       | 1.000189697 | 0.499444107 | 1.079821199  | 0.256953964 |
| Zc3h3 223642         | 1.00009819  | 0.499752297 | -1.09225947  | 0.258129378 |
| Eif3g 53356          | 1.000077139 | 0.499770529 | 1.143987014  | 0.122302503 |
| C1qbp 12261          | 1.000058707 | 0.499725948 | -1.102626369 | 0.063848346 |
| Gramd1a 52857        | 1.000010923 | 0.499973153 | -1.065639018 | 0.291855615 |
| Pabpc6 67543         | -1          | #DIV/0!     | 1            | #DIV/0!     |
| Olfr516 258720       | -1          | #DIV/0!     | 1            | #DIV/0!     |
| Olfr651 258809       | -1          | #DIV/0!     | 1            | #DIV/0!     |
| Hrnr 68723           | -1          | #DIV/0!     | 1            | #DIV/0!     |
| 1700069L16Rik 381707 | -1          | #DIV/0!     | 1            | #DIV/0!     |
| Nlrp4b 210045        | -1          | #DIV/0!     | 1            | #DIV/0!     |
| Mir1a-2 723959       | -1          | #DIV/0!     | 1            | #DIV/0!     |
| Olfr544 257926       | -1          | #DIV/0!     | 1            | #DIV/0!     |
| Olfr1040 404323      | -1          | #DIV/0!     | 1            | #DIV/0!     |
| Cdkn3 72391          | -1          | #DIV/0!     | 1            | #DIV/0!     |
| AA467197 433470      | -1          | #DIV/0!     | 1            | #DIV/0!     |

|                      |    |         |   |         |
|----------------------|----|---------|---|---------|
| Olf550 259108        | -1 | #DIV/0! | 1 | #DIV/0! |
| Taar8c 494546        | -1 | #DIV/0! | 1 | #DIV/0! |
| Olf592 404317        | -1 | #DIV/0! | 1 | #DIV/0! |
| Cdc25c 12532         | -1 | #DIV/0! | 1 | #DIV/0! |
| Svs4 20941           | -1 | #DIV/0! | 1 | #DIV/0! |
| Nps 100043254        | -1 | #DIV/0! | 1 | #DIV/0! |
| Trpv5 194352         | -1 | #DIV/0! | 1 | #DIV/0! |
| Rbm46 633285         | -1 | #DIV/0! | 1 | #DIV/0! |
| Col19a1 12823        | -1 | #DIV/0! | 1 | #DIV/0! |
| 4930483J18Rik 67638  | -1 | #DIV/0! | 1 | #DIV/0! |
| 1190003K10Rik 68880  | -1 | #DIV/0! | 1 | #DIV/0! |
| Vmn2r55 100042499    | -1 | #DIV/0! | 1 | #DIV/0! |
| Rnf182 328234        | -1 | #DIV/0! | 1 | #DIV/0! |
| Gm14379 100270707    | -1 | #DIV/0! | 1 | #DIV/0! |
| Cdh22 104010         | -1 | #DIV/0! | 1 | #DIV/0! |
| Gm2030 100039065     | -1 | #DIV/0! | 1 | #DIV/0! |
| Olf1359 258067       | -1 | #DIV/0! | 1 | #DIV/0! |
| Vmn1r230 171231      | -1 | #DIV/0! | 1 | #DIV/0! |
| Olf1426 258805       | -1 | #DIV/0! | 1 | #DIV/0! |
| Mir871 100124478     | -1 | #DIV/0! | 1 | #DIV/0! |
| 1700015G11Rik 75529  | -1 | #DIV/0! | 1 | #DIV/0! |
| Hist1h3f 260423      | -1 | #DIV/0! | 1 | #DIV/0! |
| Nrip2 60345          | -1 | #DIV/0! | 1 | #DIV/0! |
| 1700013H16Rik 75514  | -1 | #DIV/0! | 1 | #DIV/0! |
| Kndc1 76484          | -1 | #DIV/0! | 1 | #DIV/0! |
| Olf1173 404329       | -1 | #DIV/0! | 1 | #DIV/0! |
| Tmc2 192140          | -1 | #DIV/0! | 1 | #DIV/0! |
| Krtdap 64661         | -1 | #DIV/0! | 1 | #DIV/0! |
| Bhlhe22 59058        | -1 | #DIV/0! | 1 | #DIV/0! |
| Pcdhb3 93874         | -1 | #DIV/0! | 1 | #DIV/0! |
| Rbfox1 268859        | -1 | #DIV/0! | 1 | #DIV/0! |
| Snord88a 100217433   | -1 | #DIV/0! | 1 | #DIV/0! |
| Mir1937b-5 100499525 | -1 | #DIV/0! | 1 | #DIV/0! |
| Cmtm2a 73381         | -1 | #DIV/0! | 1 | #DIV/0! |
| Olf1273-ps 258977    | -1 | #DIV/0! | 1 | #DIV/0! |
| Stk33 117229         | -1 | #DIV/0! | 1 | #DIV/0! |
| Spem1 74288          | -1 | #DIV/0! | 1 | #DIV/0! |
| Olf461 258380        | -1 | #DIV/0! | 1 | #DIV/0! |
| Crisp4 78081         | -1 | #DIV/0! | 1 | #DIV/0! |
| Hist1h2aa 319163     | -1 | #DIV/0! | 1 | #DIV/0! |
| Creg2 263764         | -1 | #DIV/0! | 1 | #DIV/0! |
| Olf62 18363          | -1 | #DIV/0! | 1 | #DIV/0! |
| Snord99 100217437    | -1 | #DIV/0! | 1 | #DIV/0! |
| Ube1y1 22202         | -1 | #DIV/0! | 1 | #DIV/0! |
| Tfap2a 21418         | -1 | #DIV/0! | 1 | #DIV/0! |
| Mir743b 100124496    | -1 | #DIV/0! | 1 | #DIV/0! |
| Gykl1 14625          | -1 | #DIV/0! | 1 | #DIV/0! |
| Spag11a 78128        | -1 | #DIV/0! | 1 | #DIV/0! |
| Cst6 73720           | -1 | #DIV/0! | 1 | #DIV/0! |
| Gm11818 208820       | -1 | #DIV/0! | 1 | #DIV/0! |
| Cdh10 320873         | -1 | #DIV/0! | 1 | #DIV/0! |
| Olf507 258738        | -1 | #DIV/0! | 1 | #DIV/0! |
| Olf1402 258272       | -1 | #DIV/0! | 1 | #DIV/0! |

|                      |    |         |   |         |
|----------------------|----|---------|---|---------|
| Zdhhc11 71164        | -1 | #DIV/0! | 1 | #DIV/0! |
| Gm5886 545886        | -1 | #DIV/0! | 1 | #DIV/0! |
| Clec2l 665180        | -1 | #DIV/0! | 1 | #DIV/0! |
| Mir450-1 723869      | -1 | #DIV/0! | 1 | #DIV/0! |
| 4933427D06Rik 232217 | -1 | #DIV/0! | 1 | #DIV/0! |
| Lce1e 68694          | -1 | #DIV/0! | 1 | #DIV/0! |
| Prl8a9 67310         | -1 | #DIV/0! | 1 | #DIV/0! |
| Vmn2r110 224582      | -1 | #DIV/0! | 1 | #DIV/0! |
| Ccdc153 270150       | -1 | #DIV/0! | 1 | #DIV/0! |
| Mir1965 100316758    | -1 | #DIV/0! | 1 | #DIV/0! |
| Tnfsf15 326623       | -1 | #DIV/0! | 1 | #DIV/0! |
| Cts6 58518           | -1 | #DIV/0! | 1 | #DIV/0! |
| Mir3102 100526508    | -1 | #DIV/0! | 1 | #DIV/0! |
| Tas2r121 387349      | -1 | #DIV/0! | 1 | #DIV/0! |
| Abpd 494519          | -1 | #DIV/0! | 1 | #DIV/0! |
| Olf887 258415        | -1 | #DIV/0! | 1 | #DIV/0! |
| Smarca1 93761        | -1 | #DIV/0! | 1 | #DIV/0! |
| Olf47 18346          | -1 | #DIV/0! | 1 | #DIV/0! |
| 2410137M14Rik 76797  | -1 | #DIV/0! | 1 | #DIV/0! |
| Olf681 404318        | -1 | #DIV/0! | 1 | #DIV/0! |
| Bnpl 171388          | -1 | #DIV/0! | 1 | #DIV/0! |
| Mir704 735289        | -1 | #DIV/0! | 1 | #DIV/0! |
| Gm15319 100040599    | -1 | #DIV/0! | 1 | #DIV/0! |
| Olf1038-ps 259015    | -1 | #DIV/0! | 1 | #DIV/0! |
| Mir448 723914        | -1 | #DIV/0! | 1 | #DIV/0! |
| Gja8 14616           | -1 | #DIV/0! | 1 | #DIV/0! |
| Wdr20b 70948         | -1 | #DIV/0! | 1 | #DIV/0! |
| Gm15284 100038927    | -1 | #DIV/0! | 1 | #DIV/0! |
| Gm15698 217066       | -1 | #DIV/0! | 1 | #DIV/0! |
| Krtap1-5 69664       | -1 | #DIV/0! | 1 | #DIV/0! |
| Mc3r 17201           | -1 | #DIV/0! | 1 | #DIV/0! |
| Prkg2 19092          | -1 | #DIV/0! | 1 | #DIV/0! |
| Gabra5 110886        | -1 | #DIV/0! | 1 | #DIV/0! |
| Cwh43 231293         | -1 | #DIV/0! | 1 | #DIV/0! |
| Krt73 223915         | -1 | #DIV/0! | 1 | #DIV/0! |
| Gm4489 100043513     | -1 | #DIV/0! | 1 | #DIV/0! |
| Nat3 17962           | -1 | #DIV/0! | 1 | #DIV/0! |
| Slc18a2 214084       | -1 | #DIV/0! | 1 | #DIV/0! |
| Mboat4 234155        | -1 | #DIV/0! | 1 | #DIV/0! |
| Mir683-2 100124649   | -1 | #DIV/0! | 1 | #DIV/0! |
| Serpine3 319433      | -1 | #DIV/0! | 1 | #DIV/0! |
| Nkx2-4 228731        | -1 | #DIV/0! | 1 | #DIV/0! |
| Tdpoz3 399674        | -1 | #DIV/0! | 1 | #DIV/0! |
| Olf366 236509        | -1 | #DIV/0! | 1 | #DIV/0! |
| Crh 12918            | -1 | #DIV/0! | 1 | #DIV/0! |
| Mir222 723828        | -1 | #DIV/0! | 1 | #DIV/0! |
| 1700011F03Rik 74221  | -1 | #DIV/0! | 1 | #DIV/0! |
| Rimbp2 231760        | -1 | #DIV/0! | 1 | #DIV/0! |
| Mir1249 100526461    | -1 | #DIV/0! | 1 | #DIV/0! |
| Mir465b-1 100124473  | -1 | #DIV/0! | 1 | #DIV/0! |
| Mir701 735278        | -1 | #DIV/0! | 1 | #DIV/0! |
| 4933406J08Rik 74401  | -1 | #DIV/0! | 1 | #DIV/0! |
| Mir1964 100316711    | -1 | #DIV/0! | 1 | #DIV/0! |



|                      |    |         |   |         |
|----------------------|----|---------|---|---------|
| Olfr1255 258979      | -1 | #DIV/0! | 1 | #DIV/0! |
| Gm806 328250         | -1 | #DIV/0! | 1 | #DIV/0! |
| Rhox2f 434764        | -1 | #DIV/0! | 1 | #DIV/0! |
| Olfr800 258541       | -1 | #DIV/0! | 1 | #DIV/0! |
| Olfr1097 258840      | -1 | #DIV/0! | 1 | #DIV/0! |
| Zfp663 381405        | -1 | #DIV/0! | 1 | #DIV/0! |
| Mir3093 100526540    | -1 | #DIV/0! | 1 | #DIV/0! |
| Lcn3 16820           | -1 | #DIV/0! | 1 | #DIV/0! |
| 2310043J07Rik 69665  | -1 | #DIV/0! | 1 | #DIV/0! |
| Olfr1156 258814      | -1 | #DIV/0! | 1 | #DIV/0! |
| Olfr1148 258220      | -1 | #DIV/0! | 1 | #DIV/0! |
| Gdf5 14563           | -1 | #DIV/0! | 1 | #DIV/0! |
| Khdc1a 368204        | -1 | #DIV/0! | 1 | #DIV/0! |
| Tmem207 100043057    | -1 | #DIV/0! | 1 | #DIV/0! |
| A730037C10Rik 320604 | -1 | #DIV/0! | 1 | #DIV/0! |
| Gpr101 245424        | -1 | #DIV/0! | 1 | #DIV/0! |
| Vmn1r5 171192        | -1 | #DIV/0! | 1 | #DIV/0! |
| Stmn2 20257          | -1 | #DIV/0! | 1 | #DIV/0! |
| Olfr50 18350         | -1 | #DIV/0! | 1 | #DIV/0! |
| Esco2 71988          | -1 | #DIV/0! | 1 | #DIV/0! |
| Tnfrsf13b 57916      | -1 | #DIV/0! | 1 | #DIV/0! |
| Pbp2 76400           | -1 | #DIV/0! | 1 | #DIV/0! |
| Defb43 654458        | -1 | #DIV/0! | 1 | #DIV/0! |
| Gm94 225443          | -1 | #DIV/0! | 1 | #DIV/0! |
| Ano4 320091          | -1 | #DIV/0! | 1 | #DIV/0! |
| Mirlet7g 387249      | -1 | #DIV/0! | 1 | #DIV/0! |
| Sprr2d 20758         | -1 | #DIV/0! | 1 | #DIV/0! |
| Iqcf3 68265          | -1 | #DIV/0! | 1 | #DIV/0! |
| 2310057J18Rik 67719  | -1 | #DIV/0! | 1 | #DIV/0! |
| Krtap13 16699        | -1 | #DIV/0! | 1 | #DIV/0! |
| 4932441B19Rik 238683 | -1 | #DIV/0! | 1 | #DIV/0! |
| Vmn2r53 637908       | -1 | #DIV/0! | 1 | #DIV/0! |
| Mir500 723974        | -1 | #DIV/0! | 1 | #DIV/0! |
| 4930449I24Rik 67410  | -1 | #DIV/0! | 1 | #DIV/0! |
| Snora34 100217417    | -1 | #DIV/0! | 1 | #DIV/0! |
| Grin1 14810          | -1 | #DIV/0! | 1 | #DIV/0! |
| Oprm1 18390          | -1 | #DIV/0! | 1 | #DIV/0! |
| Tas2r107 387342      | -1 | #DIV/0! | 1 | #DIV/0! |
| Slc9a3 105243        | -1 | #DIV/0! | 1 | #DIV/0! |
| Ccdc65 105833        | -1 | #DIV/0! | 1 | #DIV/0! |
| Vmn2r37 22305        | -1 | #DIV/0! | 1 | #DIV/0! |
| Hdx 245596           | -1 | #DIV/0! | 1 | #DIV/0! |
| Mir183 387178        | -1 | #DIV/0! | 1 | #DIV/0! |
| Vgf 381677           | -1 | #DIV/0! | 1 | #DIV/0! |
| Vmn2r115 638102      | -1 | #DIV/0! | 1 | #DIV/0! |
| Krtap5-3 77215       | -1 | #DIV/0! | 1 | #DIV/0! |
| Olfr978 259109       | -1 | #DIV/0! | 1 | #DIV/0! |
| Olfr645 258247       | -1 | #DIV/0! | 1 | #DIV/0! |
| Insm1 53626          | -1 | #DIV/0! | 1 | #DIV/0! |
| 1700008F21Rik 75453  | -1 | #DIV/0! | 1 | #DIV/0! |
| 1700011E24Rik 75467  | -1 | #DIV/0! | 1 | #DIV/0! |
| Adcy8 11514          | -1 | #DIV/0! | 1 | #DIV/0! |
| Atp1b4 67821         | -1 | #DIV/0! | 1 | #DIV/0! |

|                     |    |         |   |         |
|---------------------|----|---------|---|---------|
| Krtap4-9 665998     | -1 | #DIV/0! | 1 | #DIV/0! |
| Chst9 71367         | -1 | #DIV/0! | 1 | #DIV/0! |
| Fanci 208836        | -1 | #DIV/0! | 1 | #DIV/0! |
| Olfr397 258343      | -1 | #DIV/0! | 1 | #DIV/0! |
| Oxct2a 64059        | -1 | #DIV/0! | 1 | #DIV/0! |
| Olfr485 258041      | -1 | #DIV/0! | 1 | #DIV/0! |
| Otoa 246190         | -1 | #DIV/0! | 1 | #DIV/0! |
| Olfr1537-ps1 257959 | -1 | #DIV/0! | 1 | #DIV/0! |
| Themis 210757       | -1 | #DIV/0! | 1 | #DIV/0! |
| Olfr398 258705      | -1 | #DIV/0! | 1 | #DIV/0! |
| Olfr1167 258291     | -1 | #DIV/0! | 1 | #DIV/0! |
| Lce1f 67828         | -1 | #DIV/0! | 1 | #DIV/0! |
| Kir3dl2 245615      | -1 | #DIV/0! | 1 | #DIV/0! |
| Snord45c 100217425  | -1 | #DIV/0! | 1 | #DIV/0! |
| Olfr1346 258918     | -1 | #DIV/0! | 1 | #DIV/0! |
| Hfm1 330149         | -1 | #DIV/0! | 1 | #DIV/0! |
| Lhfp15 328789       | -1 | #DIV/0! | 1 | #DIV/0! |
| Slc26a5 80979       | -1 | #DIV/0! | 1 | #DIV/0! |
| Msgn1 56184         | -1 | #DIV/0! | 1 | #DIV/0! |
| Olfr926 258811      | -1 | #DIV/0! | 1 | #DIV/0! |
| Vmn2r62 546964      | -1 | #DIV/0! | 1 | #DIV/0! |
| Ascl4 67341         | -1 | #DIV/0! | 1 | #DIV/0! |
| Olfr205 257881      | -1 | #DIV/0! | 1 | #DIV/0! |
| Usp26 83563         | -1 | #DIV/0! | 1 | #DIV/0! |
| Olfr883 258414      | -1 | #DIV/0! | 1 | #DIV/0! |
| Olfr154 27216       | -1 | #DIV/0! | 1 | #DIV/0! |
| Lman1l 235416       | -1 | #DIV/0! | 1 | #DIV/0! |
| Gm5458 432825       | -1 | #DIV/0! | 1 | #DIV/0! |
| 1700015E13Rik 76925 | -1 | #DIV/0! | 1 | #DIV/0! |
| C86695 97476        | -1 | #DIV/0! | 1 | #DIV/0! |
| Prb1 381833         | -1 | #DIV/0! | 1 | #DIV/0! |
| Ddx3y 26900         | -1 | #DIV/0! | 1 | #DIV/0! |
| Igfn1 226438        | -1 | #DIV/0! | 1 | #DIV/0! |
| Arxes2 76976        | -1 | #DIV/0! | 1 | #DIV/0! |
| Olfr556 258749      | -1 | #DIV/0! | 1 | #DIV/0! |
| Speer4e 624245      | -1 | #DIV/0! | 1 | #DIV/0! |
| Ostn 239790         | -1 | #DIV/0! | 1 | #DIV/0! |
| Pr17a2 19114        | -1 | #DIV/0! | 1 | #DIV/0! |
| Sh3gl2 20404        | -1 | #DIV/0! | 1 | #DIV/0! |
| Hoxa11as 15397      | -1 | #DIV/0! | 1 | #DIV/0! |
| Cntnap4 170571      | -1 | #DIV/0! | 1 | #DIV/0! |
| Hoxd10 15430        | -1 | #DIV/0! | 1 | #DIV/0! |
| Muc5b 74180         | -1 | #DIV/0! | 1 | #DIV/0! |
| Mir668 751523       | -1 | #DIV/0! | 1 | #DIV/0! |
| Il4 16189           | -1 | #DIV/0! | 1 | #DIV/0! |
| Olfr491 258731      | -1 | #DIV/0! | 1 | #DIV/0! |
| Hemt1 15202         | -1 | #DIV/0! | 1 | #DIV/0! |
| Allc 94041          | -1 | #DIV/0! | 1 | #DIV/0! |
| Pcdhb2 93873        | -1 | #DIV/0! | 1 | #DIV/0! |
| Slurp1 57277        | -1 | #DIV/0! | 1 | #DIV/0! |
| Bcl2l10 12049       | -1 | #DIV/0! | 1 | #DIV/0! |
| Ifna7 15970         | -1 | #DIV/0! | 1 | #DIV/0! |
| Olfr239 100038860   | -1 | #DIV/0! | 1 | #DIV/0! |

|                      |    |         |   |         |
|----------------------|----|---------|---|---------|
| Mir9-3 723968        | -1 | #DIV/0! | 1 | #DIV/0! |
| Cbln4 228942         | -1 | #DIV/0! | 1 | #DIV/0! |
| Olfr196 258775       | -1 | #DIV/0! | 1 | #DIV/0! |
| Olfr1250 258967      | -1 | #DIV/0! | 1 | #DIV/0! |
| Slc45a2 22293        | -1 | #DIV/0! | 1 | #DIV/0! |
| Rhox10 434769        | -1 | #DIV/0! | 1 | #DIV/0! |
| Klk1b11 16613        | -1 | #DIV/0! | 1 | #DIV/0! |
| Heatr7b2 223825      | -1 | #DIV/0! | 1 | #DIV/0! |
| Arsi 545260          | -1 | #DIV/0! | 1 | #DIV/0! |
| Sgcg 24053           | -1 | #DIV/0! | 1 | #DIV/0! |
| Gm8709 667572        | -1 | #DIV/0! | 1 | #DIV/0! |
| Olfr1083-ps 404326   | -1 | #DIV/0! | 1 | #DIV/0! |
| Dnajc6 72685         | -1 | #DIV/0! | 1 | #DIV/0! |
| Gsx2 14843           | -1 | #DIV/0! | 1 | #DIV/0! |
| Olfr1280 258910      | -1 | #DIV/0! | 1 | #DIV/0! |
| Eno4 226265          | -1 | #DIV/0! | 1 | #DIV/0! |
| Olfr1342 258708      | -1 | #DIV/0! | 1 | #DIV/0! |
| Mir200b 387243       | -1 | #DIV/0! | 1 | #DIV/0! |
| Olfr1201 258897      | -1 | #DIV/0! | 1 | #DIV/0! |
| Kcnip2 80906         | -1 | #DIV/0! | 1 | #DIV/0! |
| Gm6531 624855        | -1 | #DIV/0! | 1 | #DIV/0! |
| Skint7 328505        | -1 | #DIV/0! | 1 | #DIV/0! |
| Rspo4 228770         | -1 | #DIV/0! | 1 | #DIV/0! |
| Cthrc1 68588         | -1 | #DIV/0! | 1 | #DIV/0! |
| Vmn1r209 432736      | -1 | #DIV/0! | 1 | #DIV/0! |
| Mir7b 723883         | -1 | #DIV/0! | 1 | #DIV/0! |
| 4930433N12Rik 114673 | -1 | #DIV/0! | 1 | #DIV/0! |
| Slc19a3 80721        | -1 | #DIV/0! | 1 | #DIV/0! |
| Gm5478 432987        | -1 | #DIV/0! | 1 | #DIV/0! |
| Casc5 76464          | -1 | #DIV/0! | 1 | #DIV/0! |
| Snord88c 100217434   | -1 | #DIV/0! | 1 | #DIV/0! |
| Klk11 56538          | -1 | #DIV/0! | 1 | #DIV/0! |
| 4930584F24Rik 75942  | -1 | #DIV/0! | 1 | #DIV/0! |
| Trp63 22061          | -1 | #DIV/0! | 1 | #DIV/0! |
| Dgat2l6 668257       | -1 | #DIV/0! | 1 | #DIV/0! |
| Crx 12951            | -1 | #DIV/0! | 1 | #DIV/0! |
| Mir193b 100124432    | -1 | #DIV/0! | 1 | #DIV/0! |
| Vmn1r193 171259      | -1 | #DIV/0! | 1 | #DIV/0! |
| Tbr1 21375           | -1 | #DIV/0! | 1 | #DIV/0! |
| Prss3 22073          | -1 | #DIV/0! | 1 | #DIV/0! |
| Cpa2 232680          | -1 | #DIV/0! | 1 | #DIV/0! |
| Il12b 16160          | -1 | #DIV/0! | 1 | #DIV/0! |
| Mir710 735270        | -1 | #DIV/0! | 1 | #DIV/0! |
| Gm606 239789         | -1 | #DIV/0! | 1 | #DIV/0! |
| Fbxw22 382156        | -1 | #DIV/0! | 1 | #DIV/0! |
| Mir184 387179        | -1 | #DIV/0! | 1 | #DIV/0! |
| E530001F21Rik 279610 | -1 | #DIV/0! | 1 | #DIV/0! |
| Vmn1r21 171201       | -1 | #DIV/0! | 1 | #DIV/0! |
| Csmd1 94109          | -1 | #DIV/0! | 1 | #DIV/0! |
| 2610028E06Rik 72395  | -1 | #DIV/0! | 1 | #DIV/0! |
| Mir3473 100499528    | -1 | #DIV/0! | 1 | #DIV/0! |
| Hoxa13 15398         | -1 | #DIV/0! | 1 | #DIV/0! |
| Vsig1 78789          | -1 | #DIV/0! | 1 | #DIV/0! |

|                      |    |         |   |         |
|----------------------|----|---------|---|---------|
| Sox11 20666          | -1 | #DIV/0! | 1 | #DIV/0! |
| Ptchd3 74675         | -1 | #DIV/0! | 1 | #DIV/0! |
| Gm11213 670833       | -1 | #DIV/0! | 1 | #DIV/0! |
| Nppa 230899          | -1 | #DIV/0! | 1 | #DIV/0! |
| Wdr16 71860          | -1 | #DIV/0! | 1 | #DIV/0! |
| Olfr667 259062       | -1 | #DIV/0! | 1 | #DIV/0! |
| Arhgap20 244867      | -1 | #DIV/0! | 1 | #DIV/0! |
| Trim9 94090          | -1 | #DIV/0! | 1 | #DIV/0! |
| Olfr729 258275       | -1 | #DIV/0! | 1 | #DIV/0! |
| Asb5 76294           | -1 | #DIV/0! | 1 | #DIV/0! |
| Bhlhe23 140489       | -1 | #DIV/0! | 1 | #DIV/0! |
| Tmem213 77522        | -1 | #DIV/0! | 1 | #DIV/0! |
| Olfr1440 258679      | -1 | #DIV/0! | 1 | #DIV/0! |
| Mir713 751548        | -1 | #DIV/0! | 1 | #DIV/0! |
| Gm5464 432870        | -1 | #DIV/0! | 1 | #DIV/0! |
| Mir196a-2 723958     | -1 | #DIV/0! | 1 | #DIV/0! |
| Gm11937 100041488    | -1 | #DIV/0! | 1 | #DIV/0! |
| Bmp8a 12163          | -1 | #DIV/0! | 1 | #DIV/0! |
| Capn13 381122        | -1 | #DIV/0! | 1 | #DIV/0! |
| Rnase9 328401        | -1 | #DIV/0! | 1 | #DIV/0! |
| Gm13629 100038743    | -1 | #DIV/0! | 1 | #DIV/0! |
| B830017H08Rik 433004 | -1 | #DIV/0! | 1 | #DIV/0! |
| E330017A01Rik 224247 | -1 | #DIV/0! | 1 | #DIV/0! |
| Olfr479 257891       | -1 | #DIV/0! | 1 | #DIV/0! |
| Il17a 16171          | -1 | #DIV/0! | 1 | #DIV/0! |
| Cd209e 170780        | -1 | #DIV/0! | 1 | #DIV/0! |
| Gm11569 670472       | -1 | #DIV/0! | 1 | #DIV/0! |
| Gng3 14704           | -1 | #DIV/0! | 1 | #DIV/0! |
| 4931431F19Rik 70980  | -1 | #DIV/0! | 1 | #DIV/0! |
| 4930542N07Rik 75185  | -1 | #DIV/0! | 1 | #DIV/0! |
| Mir711 751536        | -1 | #DIV/0! | 1 | #DIV/0! |
| Oog1 193322          | -1 | #DIV/0! | 1 | #DIV/0! |
| B130006D01Rik 320616 | -1 | #DIV/0! | 1 | #DIV/0! |
| Pnoc 18155           | -1 | #DIV/0! | 1 | #DIV/0! |
| Fam135b 70363        | -1 | #DIV/0! | 1 | #DIV/0! |
| 1700061G19Rik 78625  | -1 | #DIV/0! | 1 | #DIV/0! |
| 9230107M04Rik 77684  | -1 | #DIV/0! | 1 | #DIV/0! |
| Stfa2 20862          | -1 | #DIV/0! | 1 | #DIV/0! |
| Gm12886 666921       | -1 | #DIV/0! | 1 | #DIV/0! |
| Tdgf1 21667          | -1 | #DIV/0! | 1 | #DIV/0! |
| Gsdmcl-ps 74460      | -1 | #DIV/0! | 1 | #DIV/0! |
| Rims1 116837         | -1 | #DIV/0! | 1 | #DIV/0! |
| Grm7 108073          | -1 | #DIV/0! | 1 | #DIV/0! |
| Mc4r 17202           | -1 | #DIV/0! | 1 | #DIV/0! |
| Gdpd4 233537         | -1 | #DIV/0! | 1 | #DIV/0! |
| Rhox4e 194856        | -1 | #DIV/0! | 1 | #DIV/0! |
| Gm11529 100038600    | -1 | #DIV/0! | 1 | #DIV/0! |
| Olfr814 259165       | -1 | #DIV/0! | 1 | #DIV/0! |
| Klra14 654449        | -1 | #DIV/0! | 1 | #DIV/0! |
| A330076H08Rik 320026 | -1 | #DIV/0! | 1 | #DIV/0! |
| Krt33a 71888         | -1 | #DIV/0! | 1 | #DIV/0! |
| Dear1 654362         | -1 | #DIV/0! | 1 | #DIV/0! |
| Atoh1 11921          | -1 | #DIV/0! | 1 | #DIV/0! |

|                      |    |         |   |         |
|----------------------|----|---------|---|---------|
| Olfr467 257919       | -1 | #DIV/0! | 1 | #DIV/0! |
| Serpinb13 241196     | -1 | #DIV/0! | 1 | #DIV/0! |
| Fgf22 67112          | -1 | #DIV/0! | 1 | #DIV/0! |
| Defb3 27358          | -1 | #DIV/0! | 1 | #DIV/0! |
| 1700067P10Rik 68224  | -1 | #DIV/0! | 1 | #DIV/0! |
| Abcb5 77706          | -1 | #DIV/0! | 1 | #DIV/0! |
| Olfr166 259071       | -1 | #DIV/0! | 1 | #DIV/0! |
| Cdh17 12557          | -1 | #DIV/0! | 1 | #DIV/0! |
| 1700003G18Rik 69350  | -1 | #DIV/0! | 1 | #DIV/0! |
| Prok2 50501          | -1 | #DIV/0! | 1 | #DIV/0! |
| Fgf7 14178           | -1 | #DIV/0! | 1 | #DIV/0! |
| Olfr904 258797       | -1 | #DIV/0! | 1 | #DIV/0! |
| Vpreb2 22363         | -1 | #DIV/0! | 1 | #DIV/0! |
| Vmn1r88 100312474    | -1 | #DIV/0! | 1 | #DIV/0! |
| 9130209A04Rik 77668  | -1 | #DIV/0! | 1 | #DIV/0! |
| Piwil1 57749         | -1 | #DIV/0! | 1 | #DIV/0! |
| 4930549C01Rik 67663  | -1 | #DIV/0! | 1 | #DIV/0! |
| Olfr384 193053       | -1 | #DIV/0! | 1 | #DIV/0! |
| Olah 99035           | -1 | #DIV/0! | 1 | #DIV/0! |
| Pou6f2 218030        | -1 | #DIV/0! | 1 | #DIV/0! |
| Crisp3 11572         | -1 | #DIV/0! | 1 | #DIV/0! |
| Mir329 723842        | -1 | #DIV/0! | 1 | #DIV/0! |
| Olfr263 18341        | -1 | #DIV/0! | 1 | #DIV/0! |
| Epha8 13842          | -1 | #DIV/0! | 1 | #DIV/0! |
| Olfr282 258449       | -1 | #DIV/0! | 1 | #DIV/0! |
| Mir125a 387235       | -1 | #DIV/0! | 1 | #DIV/0! |
| Gm13040 100040854    | -1 | #DIV/0! | 1 | #DIV/0! |
| Lrrc26 227618        | -1 | #DIV/0! | 1 | #DIV/0! |
| Pld5 319455          | -1 | #DIV/0! | 1 | #DIV/0! |
| Mc1r 17199           | -1 | #DIV/0! | 1 | #DIV/0! |
| Fgf6 14177           | -1 | #DIV/0! | 1 | #DIV/0! |
| A930003O13Rik 330052 | -1 | #DIV/0! | 1 | #DIV/0! |
| Gm13102 100041077    | -1 | #DIV/0! | 1 | #DIV/0! |
| Mir207 387203        | -1 | #DIV/0! | 1 | #DIV/0! |
| Il1f8 69677          | -1 | #DIV/0! | 1 | #DIV/0! |
| Efcab8 329541        | -1 | #DIV/0! | 1 | #DIV/0! |
| Mir1966 100316712    | -1 | #DIV/0! | 1 | #DIV/0! |
| Tmem90a 627191       | -1 | #DIV/0! | 1 | #DIV/0! |
| Olfr70 56014         | -1 | #DIV/0! | 1 | #DIV/0! |
| Klk1b27 16619        | -1 | #DIV/0! | 1 | #DIV/0! |
| Olfr403 404316       | -1 | #DIV/0! | 1 | #DIV/0! |
| Kpna7 381686         | -1 | #DIV/0! | 1 | #DIV/0! |
| Chrn4 108015         | -1 | #DIV/0! | 1 | #DIV/0! |
| Mir1306 100316814    | -1 | #DIV/0! | 1 | #DIV/0! |
| Sfn10-ps 237887      | -1 | #DIV/0! | 1 | #DIV/0! |
| Gap43 14432          | -1 | #DIV/0! | 1 | #DIV/0! |
| Olfr441 258649       | -1 | #DIV/0! | 1 | #DIV/0! |
| Npy 109648           | -1 | #DIV/0! | 1 | #DIV/0! |
| Gm4884 233164        | -1 | #DIV/0! | 1 | #DIV/0! |
| Hmgb4 69317          | -1 | #DIV/0! | 1 | #DIV/0! |
| L1td1 381591         | -1 | #DIV/0! | 1 | #DIV/0! |
| Gja3 14611           | -1 | #DIV/0! | 1 | #DIV/0! |
| Sntn 218739          | -1 | #DIV/0! | 1 | #DIV/0! |

|                     |    |         |   |         |
|---------------------|----|---------|---|---------|
| Gm7056 631105       | -1 | #DIV/0! | 1 | #DIV/0! |
| Gm1527 385263       | -1 | #DIV/0! | 1 | #DIV/0! |
| Abca13 268379       | -1 | #DIV/0! | 1 | #DIV/0! |
| Olf487 258042       | -1 | #DIV/0! | 1 | #DIV/0! |
| Pou3f4 18994        | -1 | #DIV/0! | 1 | #DIV/0! |
| Cd200r3 74603       | -1 | #DIV/0! | 1 | #DIV/0! |
| Abcc8 20927         | -1 | #DIV/0! | 1 | #DIV/0! |
| lbsp 15891          | -1 | #DIV/0! | 1 | #DIV/0! |
| Hs3st5 319415       | -1 | #DIV/0! | 1 | #DIV/0! |
| Spam1 20690         | -1 | #DIV/0! | 1 | #DIV/0! |
| Mir153 387171       | -1 | #DIV/0! | 1 | #DIV/0! |
| Gm853 332942        | -1 | #DIV/0! | 1 | #DIV/0! |
| Nmbr 18101          | -1 | #DIV/0! | 1 | #DIV/0! |
| Defb50 387334       | -1 | #DIV/0! | 1 | #DIV/0! |
| Sult1c1 20888       | -1 | #DIV/0! | 1 | #DIV/0! |
| Kcng3 225030        | -1 | #DIV/0! | 1 | #DIV/0! |
| Gm12 192852         | -1 | #DIV/0! | 1 | #DIV/0! |
| Spink8 78709        | -1 | #DIV/0! | 1 | #DIV/0! |
| Gm5414 406223       | -1 | #DIV/0! | 1 | #DIV/0! |
| Thbs4 21828         | -1 | #DIV/0! | 1 | #DIV/0! |
| Vmn1r45 22297       | -1 | #DIV/0! | 1 | #DIV/0! |
| Krt42 68239         | -1 | #DIV/0! | 1 | #DIV/0! |
| Nap1l2 17954        | -1 | #DIV/0! | 1 | #DIV/0! |
| 1700006E09Rik 75437 | -1 | #DIV/0! | 1 | #DIV/0! |
| Gm14347 627264      | -1 | #DIV/0! | 1 | #DIV/0! |
| Pcdha6 12937        | -1 | #DIV/0! | 1 | #DIV/0! |
| AY761184 382000     | -1 | #DIV/0! | 1 | #DIV/0! |
| Fhl4 14202          | -1 | #DIV/0! | 1 | #DIV/0! |
| Mir19b-2 387195     | -1 | #DIV/0! | 1 | #DIV/0! |
| Olf11 218066        | -1 | #DIV/0! | 1 | #DIV/0! |
| Rsph6a 83434        | -1 | #DIV/0! | 1 | #DIV/0! |
| BC018473 193217     | -1 | #DIV/0! | 1 | #DIV/0! |
| Olf828 258598       | -1 | #DIV/0! | 1 | #DIV/0! |
| BC080695 329986     | -1 | #DIV/0! | 1 | #DIV/0! |
| Tmprss15 19146      | -1 | #DIV/0! | 1 | #DIV/0! |
| Rad51ap2 209550     | -1 | #DIV/0! | 1 | #DIV/0! |
| Kcnmb1 16533        | -1 | #DIV/0! | 1 | #DIV/0! |
| Tacr3 21338         | -1 | #DIV/0! | 1 | #DIV/0! |
| Tmprss11a 194597    | -1 | #DIV/0! | 1 | #DIV/0! |
| Olf644 259125       | -1 | #DIV/0! | 1 | #DIV/0! |
| Magea6 17142        | -1 | #DIV/0! | 1 | #DIV/0! |
| Olf345 258947       | -1 | #DIV/0! | 1 | #DIV/0! |
| Mir9-2 723967       | -1 | #DIV/0! | 1 | #DIV/0! |
| Olf1459 258684      | -1 | #DIV/0! | 1 | #DIV/0! |
| Gm239 237558        | -1 | #DIV/0! | 1 | #DIV/0! |
| Mospd4 72076        | -1 | #DIV/0! | 1 | #DIV/0! |
| Hist1h2bm 319186    | -1 | #DIV/0! | 1 | #DIV/0! |
| Olf284 258278       | -1 | #DIV/0! | 1 | #DIV/0! |
| Olf469 258418       | -1 | #DIV/0! | 1 | #DIV/0! |
| Mir138-1 387156     | -1 | #DIV/0! | 1 | #DIV/0! |
| Abra 223513         | -1 | #DIV/0! | 1 | #DIV/0! |
| Wnt3 22415          | -1 | #DIV/0! | 1 | #DIV/0! |
| Cdh7 241201         | -1 | #DIV/0! | 1 | #DIV/0! |

|                      |    |         |   |         |
|----------------------|----|---------|---|---------|
| Olf1121 258345       | -1 | #DIV/0! | 1 | #DIV/0! |
| Igfbpl1 75426        | -1 | #DIV/0! | 1 | #DIV/0! |
| Olf1487 258629       | -1 | #DIV/0! | 1 | #DIV/0! |
| Cdrt4 66338          | -1 | #DIV/0! | 1 | #DIV/0! |
| Gm16390 100040937    | -1 | #DIV/0! | 1 | #DIV/0! |
| Krt26 320864         | -1 | #DIV/0! | 1 | #DIV/0! |
| Olf767 258315        | -1 | #DIV/0! | 1 | #DIV/0! |
| Dmrtb1 56296         | -1 | #DIV/0! | 1 | #DIV/0! |
| 1700074P13Rik 73481  | -1 | #DIV/0! | 1 | #DIV/0! |
| Mir1947 100316698    | -1 | #DIV/0! | 1 | #DIV/0! |
| Slc22a14 382113      | -1 | #DIV/0! | 1 | #DIV/0! |
| Slitrk1 76965        | -1 | #DIV/0! | 1 | #DIV/0! |
| Hpse2 545291         | -1 | #DIV/0! | 1 | #DIV/0! |
| Fabp6 16204          | -1 | #DIV/0! | 1 | #DIV/0! |
| Otop3 69602          | -1 | #DIV/0! | 1 | #DIV/0! |
| Trex2 24102          | -1 | #DIV/0! | 1 | #DIV/0! |
| Adam3 11497          | -1 | #DIV/0! | 1 | #DIV/0! |
| Olf406-ps 258181     | -1 | #DIV/0! | 1 | #DIV/0! |
| Mir467d 100124447    | -1 | #DIV/0! | 1 | #DIV/0! |
| Mrgprx1 404242       | -1 | #DIV/0! | 1 | #DIV/0! |
| Mir1893 100316773    | -1 | #DIV/0! | 1 | #DIV/0! |
| Acpt 546967          | -1 | #DIV/0! | 1 | #DIV/0! |
| 1700019O17Rik 71863  | -1 | #DIV/0! | 1 | #DIV/0! |
| Vmn2r59 628444       | -1 | #DIV/0! | 1 | #DIV/0! |
| Gabrg3 14407         | -1 | #DIV/0! | 1 | #DIV/0! |
| Mageb5 74271         | -1 | #DIV/0! | 1 | #DIV/0! |
| Lce1h 67718          | -1 | #DIV/0! | 1 | #DIV/0! |
| Rfx8 619289          | -1 | #DIV/0! | 1 | #DIV/0! |
| Olf235 258681        | -1 | #DIV/0! | 1 | #DIV/0! |
| Vmn1r52 113849       | -1 | #DIV/0! | 1 | #DIV/0! |
| Prss52 73382         | -1 | #DIV/0! | 1 | #DIV/0! |
| Krt20 66809          | -1 | #DIV/0! | 1 | #DIV/0! |
| 4933405O20Rik 243996 | -1 | #DIV/0! | 1 | #DIV/0! |
| Prss58 232717        | -1 | #DIV/0! | 1 | #DIV/0! |
| 1110032F04Rik 68725  | -1 | #DIV/0! | 1 | #DIV/0! |
| Bglap2 12097         | -1 | #DIV/0! | 1 | #DIV/0! |
| Mrgprx2 243978       | -1 | #DIV/0! | 1 | #DIV/0! |
| Gad1 14415           | -1 | #DIV/0! | 1 | #DIV/0! |
| CK137956 635169      | -1 | #DIV/0! | 1 | #DIV/0! |
| Arxes1 76219         | -1 | #DIV/0! | 1 | #DIV/0! |
| Pappa2 23850         | -1 | #DIV/0! | 1 | #DIV/0! |
| Neurog2 11924        | -1 | #DIV/0! | 1 | #DIV/0! |
| Vmn1r155 667530      | -1 | #DIV/0! | 1 | #DIV/0! |
| Tas2r110 387344      | -1 | #DIV/0! | 1 | #DIV/0! |
| Apol11a 626615       | -1 | #DIV/0! | 1 | #DIV/0! |
| Barhl2 104382        | -1 | #DIV/0! | 1 | #DIV/0! |
| Olf803 258547        | -1 | #DIV/0! | 1 | #DIV/0! |
| Vmn2r98 224552       | -1 | #DIV/0! | 1 | #DIV/0! |
| 2210010C04Rik 67373  | -1 | #DIV/0! | 1 | #DIV/0! |
| Vmn1r86 100312473    | -1 | #DIV/0! | 1 | #DIV/0! |
| Pou3f1 18991         | -1 | #DIV/0! | 1 | #DIV/0! |
| Olf78 170639         | -1 | #DIV/0! | 1 | #DIV/0! |
| Umod 22242           | -1 | #DIV/0! | 1 | #DIV/0! |

|                      |    |         |   |         |
|----------------------|----|---------|---|---------|
| Mir1224 100316739    | -1 | #DIV/0! | 1 | #DIV/0! |
| 6430531B16Rik 381933 | -1 | #DIV/0! | 1 | #DIV/0! |
| Nrsn1 22360          | -1 | #DIV/0! | 1 | #DIV/0! |
| Krt39 237934         | -1 | #DIV/0! | 1 | #DIV/0! |
| Rbmxl2 76572         | -1 | #DIV/0! | 1 | #DIV/0! |
| Olfr124 259064       | -1 | #DIV/0! | 1 | #DIV/0! |
| 4933407L21Rik 71141  | -1 | #DIV/0! | 1 | #DIV/0! |
| A730017C20Rik 225583 | -1 | #DIV/0! | 1 | #DIV/0! |
| Col11a1 12814        | -1 | #DIV/0! | 1 | #DIV/0! |
| Map6d1 208158        | -1 | #DIV/0! | 1 | #DIV/0! |
| Mir1969 100316777    | -1 | #DIV/0! | 1 | #DIV/0! |
| Mir1199 100316677    | -1 | #DIV/0! | 1 | #DIV/0! |
| Stx19 68159          | -1 | #DIV/0! | 1 | #DIV/0! |
| Dpcr1 268949         | -1 | #DIV/0! | 1 | #DIV/0! |
| Sh2d1b2 545378       | -1 | #DIV/0! | 1 | #DIV/0! |
| Vmn1r64 404285       | -1 | #DIV/0! | 1 | #DIV/0! |
| Ccdc147 381229       | -1 | #DIV/0! | 1 | #DIV/0! |
| Hist1h1a 80838       | -1 | #DIV/0! | 1 | #DIV/0! |
| Slc7a3 11989         | -1 | #DIV/0! | 1 | #DIV/0! |
| Ttlf6 237930         | -1 | #DIV/0! | 1 | #DIV/0! |
| Drd2 13489           | -1 | #DIV/0! | 1 | #DIV/0! |
| Vmn1r34 546901       | -1 | #DIV/0! | 1 | #DIV/0! |
| 2610002D18Rik 69885  | -1 | #DIV/0! | 1 | #DIV/0! |
| Mir3067 100526532    | -1 | #DIV/0! | 1 | #DIV/0! |
| Gsc2 195333          | -1 | #DIV/0! | 1 | #DIV/0! |
| 1700057G04Rik 78459  | -1 | #DIV/0! | 1 | #DIV/0! |
| Vmn1r122 435951      | -1 | #DIV/0! | 1 | #DIV/0! |
| Prss16 54373         | -1 | #DIV/0! | 1 | #DIV/0! |
| Vax2 24113           | -1 | #DIV/0! | 1 | #DIV/0! |
| Rhox1 385343         | -1 | #DIV/0! | 1 | #DIV/0! |
| Teddm1 240819        | -1 | #DIV/0! | 1 | #DIV/0! |
| Olfr732 258659       | -1 | #DIV/0! | 1 | #DIV/0! |
| Sez6l 56747          | -1 | #DIV/0! | 1 | #DIV/0! |
| Rprl3 19785          | -1 | #DIV/0! | 1 | #DIV/0! |
| Mirlet7f-1 387252    | -1 | #DIV/0! | 1 | #DIV/0! |
| Olfr342 258950       | -1 | #DIV/0! | 1 | #DIV/0! |
| Galntf5 67909        | -1 | #DIV/0! | 1 | #DIV/0! |
| Mip 17339            | -1 | #DIV/0! | 1 | #DIV/0! |
| Opn1mw 14539         | -1 | #DIV/0! | 1 | #DIV/0! |
| Myot 58916           | -1 | #DIV/0! | 1 | #DIV/0! |
| Olfr1347 258383      | -1 | #DIV/0! | 1 | #DIV/0! |
| Vmn2r70 670940       | -1 | #DIV/0! | 1 | #DIV/0! |
| Pdc 20028            | -1 | #DIV/0! | 1 | #DIV/0! |
| Olfr492 258490       | -1 | #DIV/0! | 1 | #DIV/0! |
| Dupd1 435391         | -1 | #DIV/0! | 1 | #DIV/0! |
| Defb40 360217        | -1 | #DIV/0! | 1 | #DIV/0! |
| Cpb1 76703           | -1 | #DIV/0! | 1 | #DIV/0! |
| Olfr545 258837       | -1 | #DIV/0! | 1 | #DIV/0! |
| Efcab10 75040        | -1 | #DIV/0! | 1 | #DIV/0! |
| S100a2 628324        | -1 | #DIV/0! | 1 | #DIV/0! |
| Obox5 252829         | -1 | #DIV/0! | 1 | #DIV/0! |
| Olfr1137 258101      | -1 | #DIV/0! | 1 | #DIV/0! |
| Tas2r123 353167      | -1 | #DIV/0! | 1 | #DIV/0! |



|                      |    |         |   |         |
|----------------------|----|---------|---|---------|
| Gm221 237250         | -1 | #DIV/0! | 1 | #DIV/0! |
| C030030A07Rik 654818 | -1 | #DIV/0! | 1 | #DIV/0! |
| Olfr872 258553       | -1 | #DIV/0! | 1 | #DIV/0! |
| Olfr1451 258700      | -1 | #DIV/0! | 1 | #DIV/0! |
| 4921539E11Rik 70941  | -1 | #DIV/0! | 1 | #DIV/0! |
| Rhox2c 100039948     | -1 | #DIV/0! | 1 | #DIV/0! |
| 2700086A05Rik 72628  | -1 | #DIV/0! | 1 | #DIV/0! |
| Vmn2r87 625131       | -1 | #DIV/0! | 1 | #DIV/0! |
| Hand1 15110          | -1 | #DIV/0! | 1 | #DIV/0! |
| Gm10220 434689       | -1 | #DIV/0! | 1 | #DIV/0! |
| Zfy2 22768           | -1 | #DIV/0! | 1 | #DIV/0! |
| Prl5a1 28078         | -1 | #DIV/0! | 1 | #DIV/0! |
| Gm16532 100042450    | -1 | #DIV/0! | 1 | #DIV/0! |
| Kcnip1 70357         | -1 | #DIV/0! | 1 | #DIV/0! |
| Alpk2 225638         | -1 | #DIV/0! | 1 | #DIV/0! |
| 2310007L24Rik 75573  | -1 | #DIV/0! | 1 | #DIV/0! |
| Krtap2-4 71453       | -1 | #DIV/0! | 1 | #DIV/0! |
| Mir3068 100526546    | -1 | #DIV/0! | 1 | #DIV/0! |
| Olfr460 258381       | -1 | #DIV/0! | 1 | #DIV/0! |
| Magea10 236852       | -1 | #DIV/0! | 1 | #DIV/0! |
| Olfr704 257902       | -1 | #DIV/0! | 1 | #DIV/0! |
| Olfr53 258962        | -1 | #DIV/0! | 1 | #DIV/0! |
| Ptger3 19218         | -1 | #DIV/0! | 1 | #DIV/0! |
| Olfr46 18345         | -1 | #DIV/0! | 1 | #DIV/0! |
| Olfr1213 258900      | -1 | #DIV/0! | 1 | #DIV/0! |
| 4933436C20Rik 71296  | -1 | #DIV/0! | 1 | #DIV/0! |
| C2cd4b 75697         | -1 | #DIV/0! | 1 | #DIV/0! |
| Slc22a6 18399        | -1 | #DIV/0! | 1 | #DIV/0! |
| Olfr385 259025       | -1 | #DIV/0! | 1 | #DIV/0! |
| Olfr173 259002       | -1 | #DIV/0! | 1 | #DIV/0! |
| Tdrd1 83561          | -1 | #DIV/0! | 1 | #DIV/0! |
| Snora20 100303746    | -1 | #DIV/0! | 1 | #DIV/0! |
| Gpr111 435529        | -1 | #DIV/0! | 1 | #DIV/0! |
| Mir320 723838        | -1 | #DIV/0! | 1 | #DIV/0! |
| Prr9 109314          | -1 | #DIV/0! | 1 | #DIV/0! |
| Gm5136 368203        | -1 | #DIV/0! | 1 | #DIV/0! |
| 1700024G13Rik 67085  | -1 | #DIV/0! | 1 | #DIV/0! |
| 4930503H13Rik 74941  | -1 | #DIV/0! | 1 | #DIV/0! |
| Agtr2 11609          | -1 | #DIV/0! | 1 | #DIV/0! |
| Gm13124 627085       | -1 | #DIV/0! | 1 | #DIV/0! |
| Sdr16c6 242286       | -1 | #DIV/0! | 1 | #DIV/0! |
| Clca2 80797          | -1 | #DIV/0! | 1 | #DIV/0! |
| Ppef2 19023          | -1 | #DIV/0! | 1 | #DIV/0! |
| Galr1 14427          | -1 | #DIV/0! | 1 | #DIV/0! |
| Vmn2r41 100042848    | -1 | #DIV/0! | 1 | #DIV/0! |
| Cnksr2 245684        | -1 | #DIV/0! | 1 | #DIV/0! |
| Pax2 18504           | -1 | #DIV/0! | 1 | #DIV/0! |
| AA387883 100043450   | -1 | #DIV/0! | 1 | #DIV/0! |
| Olfr1307 257956      | -1 | #DIV/0! | 1 | #DIV/0! |
| Ndst3 83398          | -1 | #DIV/0! | 1 | #DIV/0! |
| Vmn2r38 434110       | -1 | #DIV/0! | 1 | #DIV/0! |
| Gm5726 435946        | -1 | #DIV/0! | 1 | #DIV/0! |
| Bsx 244813           | -1 | #DIV/0! | 1 | #DIV/0! |

|                     |    |         |   |         |
|---------------------|----|---------|---|---------|
| Aanat 11298         | -1 | #DIV/0! | 1 | #DIV/0! |
| Gm8884 667933       | -1 | #DIV/0! | 1 | #DIV/0! |
| 1810030J14Rik 66289 | -1 | #DIV/0! | 1 | #DIV/0! |
| Sohlh2 74434        | -1 | #DIV/0! | 1 | #DIV/0! |
| Mbd3l2 234988       | -1 | #DIV/0! | 1 | #DIV/0! |
| AA545190 57866      | -1 | #DIV/0! | 1 | #DIV/0! |
| Crmp1 12933         | -1 | #DIV/0! | 1 | #DIV/0! |
| Gm14525 100039120   | -1 | #DIV/0! | 1 | #DIV/0! |
| Cacng4 54377        | -1 | #DIV/0! | 1 | #DIV/0! |
| Mir31 723895        | -1 | #DIV/0! | 1 | #DIV/0! |
| Vmn1r14 113864      | -1 | #DIV/0! | 1 | #DIV/0! |
| Vmn1r148 81011      | -1 | #DIV/0! | 1 | #DIV/0! |
| Usp9y 107868        | -1 | #DIV/0! | 1 | #DIV/0! |
| Cnga3 12790         | -1 | #DIV/0! | 1 | #DIV/0! |
| Olfr679 259046      | -1 | #DIV/0! | 1 | #DIV/0! |
| Rxfp4 242093        | -1 | #DIV/0! | 1 | #DIV/0! |
| Accn4 241118        | -1 | #DIV/0! | 1 | #DIV/0! |
| Npy2r 18167         | -1 | #DIV/0! | 1 | #DIV/0! |
| Pax6os1 402728      | -1 | #DIV/0! | 1 | #DIV/0! |
| Il6 16193           | -1 | #DIV/0! | 1 | #DIV/0! |
| Dlx3 13393          | -1 | #DIV/0! | 1 | #DIV/0! |
| Olfr1415 258228     | -1 | #DIV/0! | 1 | #DIV/0! |
| Snord83b 100302601  | -1 | #DIV/0! | 1 | #DIV/0! |
| Gm11435 629303      | -1 | #DIV/0! | 1 | #DIV/0! |
| Tnni1 21952         | -1 | #DIV/0! | 1 | #DIV/0! |
| Gm5935 546282       | -1 | #DIV/0! | 1 | #DIV/0! |
| 4930547N16Rik 75317 | -1 | #DIV/0! | 1 | #DIV/0! |
| Hist1h3e 319151     | -1 | #DIV/0! | 1 | #DIV/0! |
| Olfr1328 258394     | -1 | #DIV/0! | 1 | #DIV/0! |
| Gm16523 100042584   | -1 | #DIV/0! | 1 | #DIV/0! |
| Vstm2l 277432       | -1 | #DIV/0! | 1 | #DIV/0! |
| Olfr444 258650      | -1 | #DIV/0! | 1 | #DIV/0! |
| Ms4a5 269063        | -1 | #DIV/0! | 1 | #DIV/0! |
| Gm5635 434729       | -1 | #DIV/0! | 1 | #DIV/0! |
| Ntf5 78405          | -1 | #DIV/0! | 1 | #DIV/0! |
| Trat1 77647         | -1 | #DIV/0! | 1 | #DIV/0! |
| Gm10375 100042342   | -1 | #DIV/0! | 1 | #DIV/0! |
| Adam7 11500         | -1 | #DIV/0! | 1 | #DIV/0! |
| Gas2l2 237891       | -1 | #DIV/0! | 1 | #DIV/0! |
| 1700128F08Rik 76669 | -1 | #DIV/0! | 1 | #DIV/0! |
| Daf2 13137          | -1 | #DIV/0! | 1 | #DIV/0! |
| Olfr112 258096      | -1 | #DIV/0! | 1 | #DIV/0! |
| Snord15a 449630     | -1 | #DIV/0! | 1 | #DIV/0! |
| Nlrp9b 243874       | -1 | #DIV/0! | 1 | #DIV/0! |
| lqsec3 243621       | -1 | #DIV/0! | 1 | #DIV/0! |
| Dbc1 56710          | -1 | #DIV/0! | 1 | #DIV/0! |
| Olfr328 258495      | -1 | #DIV/0! | 1 | #DIV/0! |
| Vmn1r124 670764     | -1 | #DIV/0! | 1 | #DIV/0! |
| Arhgef38 77669      | -1 | #DIV/0! | 1 | #DIV/0! |
| Clcn1 12723         | -1 | #DIV/0! | 1 | #DIV/0! |
| Maneal 215090       | -1 | #DIV/0! | 1 | #DIV/0! |
| Gm9112 668339       | -1 | #DIV/0! | 1 | #DIV/0! |
| Olfr294 257904      | -1 | #DIV/0! | 1 | #DIV/0! |

|                      |    |         |   |         |
|----------------------|----|---------|---|---------|
| Olfr971 258607       | -1 | #DIV/0! | 1 | #DIV/0! |
| Olfr1082 404473      | -1 | #DIV/0! | 1 | #DIV/0! |
| Mir3107 100526510    | -1 | #DIV/0! | 1 | #DIV/0! |
| Psg17 26437          | -1 | #DIV/0! | 1 | #DIV/0! |
| Hist2h2ab 621893     | -1 | #DIV/0! | 1 | #DIV/0! |
| Nkx2-9 18094         | -1 | #DIV/0! | 1 | #DIV/0! |
| Ppyr1 19065          | -1 | #DIV/0! | 1 | #DIV/0! |
| Vmn2r31 100042591    | -1 | #DIV/0! | 1 | #DIV/0! |
| Vmn1r42 113848       | -1 | #DIV/0! | 1 | #DIV/0! |
| Gm10731 100039043    | -1 | #DIV/0! | 1 | #DIV/0! |
| Obox3 246791         | -1 | #DIV/0! | 1 | #DIV/0! |
| Il23r 209590         | -1 | #DIV/0! | 1 | #DIV/0! |
| Klh131 244923        | -1 | #DIV/0! | 1 | #DIV/0! |
| C330005M16Rik 101744 | -1 | #DIV/0! | 1 | #DIV/0! |
| Olfr148 258498       | -1 | #DIV/0! | 1 | #DIV/0! |
| Mir3085 100526549    | -1 | #DIV/0! | 1 | #DIV/0! |
| A430089I19Rik 331195 | -1 | #DIV/0! | 1 | #DIV/0! |
| Olfr367-ps 545417    | -1 | #DIV/0! | 1 | #DIV/0! |
| Rho 212541           | -1 | #DIV/0! | 1 | #DIV/0! |
| Tekt1 21689          | -1 | #DIV/0! | 1 | #DIV/0! |
| Olfr652 259050       | -1 | #DIV/0! | 1 | #DIV/0! |
| Ampd1 229665         | -1 | #DIV/0! | 1 | #DIV/0! |
| Gm15299 100041811    | -1 | #DIV/0! | 1 | #DIV/0! |
| Gm128 229588         | -1 | #DIV/0! | 1 | #DIV/0! |
| 1500009L16Rik 69784  | -1 | #DIV/0! | 1 | #DIV/0! |
| Olfr135 258329       | -1 | #DIV/0! | 1 | #DIV/0! |
| Gabra1 14394         | -1 | #DIV/0! | 1 | #DIV/0! |
| Olfr52 18352         | -1 | #DIV/0! | 1 | #DIV/0! |
| Olfr693 258445       | -1 | #DIV/0! | 1 | #DIV/0! |
| Mir411 723936        | -1 | #DIV/0! | 1 | #DIV/0! |
| Vmn2r6 667069        | -1 | #DIV/0! | 1 | #DIV/0! |
| Phactr3 74189        | -1 | #DIV/0! | 1 | #DIV/0! |
| Tcf15 277353         | -1 | #DIV/0! | 1 | #DIV/0! |
| 1700020A23Rik 75656  | -1 | #DIV/0! | 1 | #DIV/0! |
| Omt2a 18379          | -1 | #DIV/0! | 1 | #DIV/0! |
| Defb19 246700        | -1 | #DIV/0! | 1 | #DIV/0! |
| Mir302b 723948       | -1 | #DIV/0! | 1 | #DIV/0! |
| Mir148b 724064       | -1 | #DIV/0! | 1 | #DIV/0! |
| 2900092C05Rik 73090  | -1 | #DIV/0! | 1 | #DIV/0! |
| Olfr176 258995       | -1 | #DIV/0! | 1 | #DIV/0! |
| Igll1 16136          | -1 | #DIV/0! | 1 | #DIV/0! |
| Ascl1 17172          | -1 | #DIV/0! | 1 | #DIV/0! |
| Olfr900 258874       | -1 | #DIV/0! | 1 | #DIV/0! |
| Pcp4 18546           | -1 | #DIV/0! | 1 | #DIV/0! |
| Oxt 18429            | -1 | #DIV/0! | 1 | #DIV/0! |
| Gm648 270599         | -1 | #DIV/0! | 1 | #DIV/0! |
| Olfr165 258458       | -1 | #DIV/0! | 1 | #DIV/0! |
| Olfr998 258428       | -1 | #DIV/0! | 1 | #DIV/0! |
| Gm5156 381936        | -1 | #DIV/0! | 1 | #DIV/0! |
| Ifna4 15967          | -1 | #DIV/0! | 1 | #DIV/0! |
| Olfr1110 258765      | -1 | #DIV/0! | 1 | #DIV/0! |
| Usp17f5 13532        | -1 | #DIV/0! | 1 | #DIV/0! |
| Cpvl 71287           | -1 | #DIV/0! | 1 | #DIV/0! |

|                      |    |         |   |         |
|----------------------|----|---------|---|---------|
| Gm13057 100040861    | -1 | #DIV/0! | 1 | #DIV/0! |
| Neurod4 11923        | -1 | #DIV/0! | 1 | #DIV/0! |
| Mir876 100124458     | -1 | #DIV/0! | 1 | #DIV/0! |
| Ast1 215095          | -1 | #DIV/0! | 1 | #DIV/0! |
| Vmn1r213 171249      | -1 | #DIV/0! | 1 | #DIV/0! |
| Krtap26-1 69533      | -1 | #DIV/0! | 1 | #DIV/0! |
| Rhox4f 636177        | -1 | #DIV/0! | 1 | #DIV/0! |
| Scrt2 545474         | -1 | #DIV/0! | 1 | #DIV/0! |
| Trim29 72169         | -1 | #DIV/0! | 1 | #DIV/0! |
| A230057D06Rik 319893 | -1 | #DIV/0! | 1 | #DIV/0! |
| Moxd2 194357         | -1 | #DIV/0! | 1 | #DIV/0! |
| Ear7 53873           | -1 | #DIV/0! | 1 | #DIV/0! |
| Olf1130 258835       | -1 | #DIV/0! | 1 | #DIV/0! |
| Ear11 93726          | -1 | #DIV/0! | 1 | #DIV/0! |
| Mir143 387161        | -1 | #DIV/0! | 1 | #DIV/0! |
| Reg3b 18489          | -1 | #DIV/0! | 1 | #DIV/0! |
| Olf1013 258757       | -1 | #DIV/0! | 1 | #DIV/0! |
| Gm16386 100042679    | -1 | #DIV/0! | 1 | #DIV/0! |
| BC052688 432812      | -1 | #DIV/0! | 1 | #DIV/0! |
| Snord70 100217459    | -1 | #DIV/0! | 1 | #DIV/0! |
| Xkr5 319581          | -1 | #DIV/0! | 1 | #DIV/0! |
| 1700092M07Rik 74307  | -1 | #DIV/0! | 1 | #DIV/0! |
| Cpa4 71791           | -1 | #DIV/0! | 1 | #DIV/0! |
| Hist1h3a 360198      | -1 | #DIV/0! | 1 | #DIV/0! |
| Opcml 330908         | -1 | #DIV/0! | 1 | #DIV/0! |
| Spaca7 78634         | -1 | #DIV/0! | 1 | #DIV/0! |
| Olf1510 258423       | -1 | #DIV/0! | 1 | #DIV/0! |
| Bcan 12032           | -1 | #DIV/0! | 1 | #DIV/0! |
| 1700020C07Rik 75642  | -1 | #DIV/0! | 1 | #DIV/0! |
| Dpp10 269109         | -1 | #DIV/0! | 1 | #DIV/0! |
| Olf389 259011        | -1 | #DIV/0! | 1 | #DIV/0! |
| Gjb4 14621           | -1 | #DIV/0! | 1 | #DIV/0! |
| Ccdc150 78016        | -1 | #DIV/0! | 1 | #DIV/0! |
| 5930412G12Rik 319616 | -1 | #DIV/0! | 1 | #DIV/0! |
| Tlx2 21909           | -1 | #DIV/0! | 1 | #DIV/0! |
| Mir1196 100316771    | -1 | #DIV/0! | 1 | #DIV/0! |
| Vmn2r19 232358       | -1 | #DIV/0! | 1 | #DIV/0! |
| Pgbd5 209966         | -1 | #DIV/0! | 1 | #DIV/0! |
| Glb1l3 70893         | -1 | #DIV/0! | 1 | #DIV/0! |
| Adamts17 233332      | -1 | #DIV/0! | 1 | #DIV/0! |
| Vmn1r58 81014        | -1 | #DIV/0! | 1 | #DIV/0! |
| Sel1l2 228684        | -1 | #DIV/0! | 1 | #DIV/0! |
| Scn5a 20271          | -1 | #DIV/0! | 1 | #DIV/0! |
| Ankrd36 76389        | -1 | #DIV/0! | 1 | #DIV/0! |
| Spint4 78239         | -1 | #DIV/0! | 1 | #DIV/0! |
| Olf195 259000        | -1 | #DIV/0! | 1 | #DIV/0! |
| Mir375 723900        | -1 | #DIV/0! | 1 | #DIV/0! |
| Ube2dnl 237009       | -1 | #DIV/0! | 1 | #DIV/0! |
| Mir126 387145        | -1 | #DIV/0! | 1 | #DIV/0! |
| Mir122a 387231       | -1 | #DIV/0! | 1 | #DIV/0! |
| Olf618 259049        | -1 | #DIV/0! | 1 | #DIV/0! |
| Olf671 257910        | -1 | #DIV/0! | 1 | #DIV/0! |
| Cryba1 12957         | -1 | #DIV/0! | 1 | #DIV/0! |

|                         |    |         |   |         |
|-------------------------|----|---------|---|---------|
| 4930547C10Rik 68274     | -1 | #DIV/0! | 1 | #DIV/0! |
| Mir2136 100316725       | -1 | #DIV/0! | 1 | #DIV/0! |
| Hoxb13 15408            | -1 | #DIV/0! | 1 | #DIV/0! |
| Taar7a 215856           | -1 | #DIV/0! | 1 | #DIV/0! |
| Cma2 545055             | -1 | #DIV/0! | 1 | #DIV/0! |
| Sftpb 20388             | -1 | #DIV/0! | 1 | #DIV/0! |
| Has1 15116              | -1 | #DIV/0! | 1 | #DIV/0! |
| Gm4832 225058           | -1 | #DIV/0! | 1 | #DIV/0! |
| 2610018G03Rik 70415     | -1 | #DIV/0! | 1 | #DIV/0! |
| Gm17359 100233207       | -1 | #DIV/0! | 1 | #DIV/0! |
| Mir1933 100316753       | -1 | #DIV/0! | 1 | #DIV/0! |
| Mir467a-2 100526522     | -1 | #DIV/0! | 1 | #DIV/0! |
| A730020M07Rik 100503044 | -1 | #DIV/0! | 1 | #DIV/0! |
| Slitrk4 245446          | -1 | #DIV/0! | 1 | #DIV/0! |
| Prok1 246691            | -1 | #DIV/0! | 1 | #DIV/0! |
| 1700008P20Rik 69301     | -1 | #DIV/0! | 1 | #DIV/0! |
| Olfr399 259006          | -1 | #DIV/0! | 1 | #DIV/0! |
| Vmn2r85 623734          | -1 | #DIV/0! | 1 | #DIV/0! |
| Gm12769 100043860       | -1 | #DIV/0! | 1 | #DIV/0! |
| Btn1a1 12231            | -1 | #DIV/0! | 1 | #DIV/0! |
| Ivl 16447               | -1 | #DIV/0! | 1 | #DIV/0! |
| Olfr146 258742          | -1 | #DIV/0! | 1 | #DIV/0! |
| Astn1 11899             | -1 | #DIV/0! | 1 | #DIV/0! |
| Nlrp4e 446099           | -1 | #DIV/0! | 1 | #DIV/0! |
| Vmn1r1 625823           | -1 | #DIV/0! | 1 | #DIV/0! |
| Olfr101 258831          | -1 | #DIV/0! | 1 | #DIV/0! |
| Ces2b 234669            | -1 | #DIV/0! | 1 | #DIV/0! |
| Rhox4d 664610           | -1 | #DIV/0! | 1 | #DIV/0! |
| 1700019A02Rik 69397     | -1 | #DIV/0! | 1 | #DIV/0! |
| H2-T3 15043             | -1 | #DIV/0! | 1 | #DIV/0! |
| Vmn1r135 667404         | -1 | #DIV/0! | 1 | #DIV/0! |
| Mir3077 100526476       | -1 | #DIV/0! | 1 | #DIV/0! |
| Fcr15 329693            | -1 | #DIV/0! | 1 | #DIV/0! |
| Olfr1036 258245         | -1 | #DIV/0! | 1 | #DIV/0! |
| Krt34 16672             | -1 | #DIV/0! | 1 | #DIV/0! |
| L3mbt4 320858           | -1 | #DIV/0! | 1 | #DIV/0! |
| BB031773 100473         | -1 | #DIV/0! | 1 | #DIV/0! |
| Kcnu1 16532             | -1 | #DIV/0! | 1 | #DIV/0! |
| Rprml 104582            | -1 | #DIV/0! | 1 | #DIV/0! |
| Olfr1489 258628         | -1 | #DIV/0! | 1 | #DIV/0! |
| Gm5531 433365           | -1 | #DIV/0! | 1 | #DIV/0! |
| Rab9b 319642            | -1 | #DIV/0! | 1 | #DIV/0! |
| Gm12597 242517          | -1 | #DIV/0! | 1 | #DIV/0! |
| Fam154a 75811           | -1 | #DIV/0! | 1 | #DIV/0! |
| Mirlet7c-2 723966       | -1 | #DIV/0! | 1 | #DIV/0! |
| Olfr924 404322          | -1 | #DIV/0! | 1 | #DIV/0! |
| Mir1961 100316841       | -1 | #DIV/0! | 1 | #DIV/0! |
| Mir20a 387139           | -1 | #DIV/0! | 1 | #DIV/0! |
| Lmx1a 110648            | -1 | #DIV/0! | 1 | #DIV/0! |
| Greb1 268527            | -1 | #DIV/0! | 1 | #DIV/0! |
| Slc22a19 207151         | -1 | #DIV/0! | 1 | #DIV/0! |
| Ccdc79 320022           | -1 | #DIV/0! | 1 | #DIV/0! |
| Olfr1112 258655         | -1 | #DIV/0! | 1 | #DIV/0! |

|                         |    |         |   |         |
|-------------------------|----|---------|---|---------|
| Pde6b 18587             | -1 | #DIV/0! | 1 | #DIV/0! |
| Rab33a 19337            | -1 | #DIV/0! | 1 | #DIV/0! |
| 2610034M16Rik 69239     | -1 | #DIV/0! | 1 | #DIV/0! |
| Zscan4c 245109          | -1 | #DIV/0! | 1 | #DIV/0! |
| Aym1 503692             | -1 | #DIV/0! | 1 | #DIV/0! |
| Olf1277 258391          | -1 | #DIV/0! | 1 | #DIV/0! |
| Mir539 723917           | -1 | #DIV/0! | 1 | #DIV/0! |
| Dnmt3l 54427            | -1 | #DIV/0! | 1 | #DIV/0! |
| Lrrtm1 74342            | -1 | #DIV/0! | 1 | #DIV/0! |
| Syt16 238266            | -1 | #DIV/0! | 1 | #DIV/0! |
| Spink10 328971          | -1 | #DIV/0! | 1 | #DIV/0! |
| Ptn 19242               | -1 | #DIV/0! | 1 | #DIV/0! |
| Tm4sf20 66261           | -1 | #DIV/0! | 1 | #DIV/0! |
| Mir15b 387175           | -1 | #DIV/0! | 1 | #DIV/0! |
| Foxr1 382074            | -1 | #DIV/0! | 1 | #DIV/0! |
| Clec18a 353287          | -1 | #DIV/0! | 1 | #DIV/0! |
| Tdrd12 71981            | -1 | #DIV/0! | 1 | #DIV/0! |
| Gm15070 100038527       | -1 | #DIV/0! | 1 | #DIV/0! |
| Lgi1 56839              | -1 | #DIV/0! | 1 | #DIV/0! |
| Kcnj6 16522             | -1 | #DIV/0! | 1 | #DIV/0! |
| Mir503 723879           | -1 | #DIV/0! | 1 | #DIV/0! |
| Gabrr1 14408            | -1 | #DIV/0! | 1 | #DIV/0! |
| Gabrr3 328699           | -1 | #DIV/0! | 1 | #DIV/0! |
| Magea2 17138            | -1 | #DIV/0! | 1 | #DIV/0! |
| Olf1891 258471          | -1 | #DIV/0! | 1 | #DIV/0! |
| Hmx1 15371              | -1 | #DIV/0! | 1 | #DIV/0! |
| B020004J07Rik 545662    | -1 | #DIV/0! | 1 | #DIV/0! |
| Dscc1 72107             | -1 | #DIV/0! | 1 | #DIV/0! |
| Ccdc108 241116          | -1 | #DIV/0! | 1 | #DIV/0! |
| Mir669b 735255          | -1 | #DIV/0! | 1 | #DIV/0! |
| Mir344b 100526558       | -1 | #DIV/0! | 1 | #DIV/0! |
| Pappa 18491             | -1 | #DIV/0! | 1 | #DIV/0! |
| Slc34a3 142681          | -1 | #DIV/0! | 1 | #DIV/0! |
| Olf1402 258703          | -1 | #DIV/0! | 1 | #DIV/0! |
| Nos1 18125              | -1 | #DIV/0! | 1 | #DIV/0! |
| Pmp2 18857              | -1 | #DIV/0! | 1 | #DIV/0! |
| Olf1884 257996          | -1 | #DIV/0! | 1 | #DIV/0! |
| Trpc5 22067             | -1 | #DIV/0! | 1 | #DIV/0! |
| Gm4461 100043474        | -1 | #DIV/0! | 1 | #DIV/0! |
| 4930488L21Rik 75809     | -1 | #DIV/0! | 1 | #DIV/0! |
| Clec4e 56619            | -1 | #DIV/0! | 1 | #DIV/0! |
| 3110082D06Rik 627626    | -1 | #DIV/0! | 1 | #DIV/0! |
| Ly6f 17071              | -1 | #DIV/0! | 1 | #DIV/0! |
| Gm4307 100043239        | -1 | #DIV/0! | 1 | #DIV/0! |
| Ceacam14 67084          | -1 | #DIV/0! | 1 | #DIV/0! |
| Mir882 100124461        | -1 | #DIV/0! | 1 | #DIV/0! |
| Gm2825 100040533        | -1 | #DIV/0! | 1 | #DIV/0! |
| Syt2 20980              | -1 | #DIV/0! | 1 | #DIV/0! |
| 1700049E15Rik 100039727 | -1 | #DIV/0! | 1 | #DIV/0! |
| Scarna6 100217415       | -1 | #DIV/0! | 1 | #DIV/0! |
| Prame 75829             | -1 | #DIV/0! | 1 | #DIV/0! |
| Mir25 723926            | -1 | #DIV/0! | 1 | #DIV/0! |
| Slx 664829              | -1 | #DIV/0! | 1 | #DIV/0! |

|                     |    |         |   |         |
|---------------------|----|---------|---|---------|
| Rbm44 329207        | -1 | #DIV/0! | 1 | #DIV/0! |
| Olfr187 258319      | -1 | #DIV/0! | 1 | #DIV/0! |
| Mir27a 387220       | -1 | #DIV/0! | 1 | #DIV/0! |
| Mir3065 100526518   | -1 | #DIV/0! | 1 | #DIV/0! |
| Olfr868 258552      | -1 | #DIV/0! | 1 | #DIV/0! |
| Taar7b 209517       | -1 | #DIV/0! | 1 | #DIV/0! |
| Krt31 16660         | -1 | #DIV/0! | 1 | #DIV/0! |
| Ear1 13586          | -1 | #DIV/0! | 1 | #DIV/0! |
| Vmn1r207-ps 432735  | -1 | #DIV/0! | 1 | #DIV/0! |
| Six3 20473          | -1 | #DIV/0! | 1 | #DIV/0! |
| Mir878 100124479    | -1 | #DIV/0! | 1 | #DIV/0! |
| Prl8a2 13529        | -1 | #DIV/0! | 1 | #DIV/0! |
| Mir467b 735257      | -1 | #DIV/0! | 1 | #DIV/0! |
| Bves 23828          | -1 | #DIV/0! | 1 | #DIV/0! |
| Cyp4a29-ps 230639   | -1 | #DIV/0! | 1 | #DIV/0! |
| D5Erttd577e 320549  | -1 | #DIV/0! | 1 | #DIV/0! |
| Gm5622 434459       | -1 | #DIV/0! | 1 | #DIV/0! |
| Olfr623 259126      | -1 | #DIV/0! | 1 | #DIV/0! |
| Defa26 626708       | -1 | #DIV/0! | 1 | #DIV/0! |
| Speer5-ps1 70365    | -1 | #DIV/0! | 1 | #DIV/0! |
| Olfr1356 258305     | -1 | #DIV/0! | 1 | #DIV/0! |
| Gramd2 546134       | -1 | #DIV/0! | 1 | #DIV/0! |
| Tnfsf4 22164        | -1 | #DIV/0! | 1 | #DIV/0! |
| Spr1a 20753         | -1 | #DIV/0! | 1 | #DIV/0! |
| Olfr64 18366        | -1 | #DIV/0! | 1 | #DIV/0! |
| Scrn1 69938         | -1 | #DIV/0! | 1 | #DIV/0! |
| 2300005B03Rik 69462 | -1 | #DIV/0! | 1 | #DIV/0! |
| Olfr1053 257974     | -1 | #DIV/0! | 1 | #DIV/0! |
| Vmn1r158 100043067  | -1 | #DIV/0! | 1 | #DIV/0! |
| Snora26 100313943   | -1 | #DIV/0! | 1 | #DIV/0! |
| Krt2 16681          | -1 | #DIV/0! | 1 | #DIV/0! |
| Ccna1 12427         | -1 | #DIV/0! | 1 | #DIV/0! |
| Gm5894 545947       | -1 | #DIV/0! | 1 | #DIV/0! |
| Olfr1129 258111     | -1 | #DIV/0! | 1 | #DIV/0! |
| Gng4 14706          | -1 | #DIV/0! | 1 | #DIV/0! |
| Mir182 387177       | -1 | #DIV/0! | 1 | #DIV/0! |
| Olfr846 258279      | -1 | #DIV/0! | 1 | #DIV/0! |
| Eya4 14051          | -1 | #DIV/0! | 1 | #DIV/0! |
| Taar4 209513        | -1 | #DIV/0! | 1 | #DIV/0! |
| Gm597 210962        | -1 | #DIV/0! | 1 | #DIV/0! |
| Olfr517 258136      | -1 | #DIV/0! | 1 | #DIV/0! |
| Tktl2 74419         | -1 | #DIV/0! | 1 | #DIV/0! |
| Sv2c 75209          | -1 | #DIV/0! | 1 | #DIV/0! |
| Olfr710 258594      | -1 | #DIV/0! | 1 | #DIV/0! |
| Cryga 12964         | -1 | #DIV/0! | 1 | #DIV/0! |
| Vmn1r212 171275     | -1 | #DIV/0! | 1 | #DIV/0! |
| Defb48 432867       | -1 | #DIV/0! | 1 | #DIV/0! |
| Olfr646 259058      | -1 | #DIV/0! | 1 | #DIV/0! |
| Iqcf4 67320         | -1 | #DIV/0! | 1 | #DIV/0! |
| Slc24a2 76376       | -1 | #DIV/0! | 1 | #DIV/0! |
| Gm5166 382233       | -1 | #DIV/0! | 1 | #DIV/0! |
| Tsks 22116          | -1 | #DIV/0! | 1 | #DIV/0! |
| Dmrt3 240590        | -1 | #DIV/0! | 1 | #DIV/0! |

|                     |    |         |   |         |
|---------------------|----|---------|---|---------|
| Olfr117 258263      | -1 | #DIV/0! | 1 | #DIV/0! |
| Foxe1 110805        | -1 | #DIV/0! | 1 | #DIV/0! |
| Olfr1252 404331     | -1 | #DIV/0! | 1 | #DIV/0! |
| Mir1264 100526460   | -1 | #DIV/0! | 1 | #DIV/0! |
| Vmn1r66 171264      | -1 | #DIV/0! | 1 | #DIV/0! |
| Upk2 22269          | -1 | #DIV/0! | 1 | #DIV/0! |
| Enthd1 383075       | -1 | #DIV/0! | 1 | #DIV/0! |
| Olfr1474 258123     | -1 | #DIV/0! | 1 | #DIV/0! |
| Mir17 723905        | -1 | #DIV/0! | 1 | #DIV/0! |
| Grm6 108072         | -1 | #DIV/0! | 1 | #DIV/0! |
| 4931417E11Rik 66740 | -1 | #DIV/0! | 1 | #DIV/0! |
| Olfr576 258248      | -1 | #DIV/0! | 1 | #DIV/0! |
| Mir346 723847       | -1 | #DIV/0! | 1 | #DIV/0! |
| S100a7a 381493      | -1 | #DIV/0! | 1 | #DIV/0! |
| Olfr149 235256      | -1 | #DIV/0! | 1 | #DIV/0! |
| Slc7a9 30962        | -1 | #DIV/0! | 1 | #DIV/0! |
| Gm10406 100038847   | -1 | #DIV/0! | 1 | #DIV/0! |
| Dub1a 381944        | -1 | #DIV/0! | 1 | #DIV/0! |
| Six3os1 100043902   | -1 | #DIV/0! | 1 | #DIV/0! |
| Grm1 14816          | -1 | #DIV/0! | 1 | #DIV/0! |
| Cep55 74107         | -1 | #DIV/0! | 1 | #DIV/0! |
| Nlrp5 23968         | -1 | #DIV/0! | 1 | #DIV/0! |
| Depdc1b 218581      | -1 | #DIV/0! | 1 | #DIV/0! |
| Klk5 68668          | -1 | #DIV/0! | 1 | #DIV/0! |
| Atp4b 11945         | -1 | #DIV/0! | 1 | #DIV/0! |
| 1700113H08Rik 76640 | -1 | #DIV/0! | 1 | #DIV/0! |
| Olfr799 258929      | -1 | #DIV/0! | 1 | #DIV/0! |
| Rhox3-ps 546295     | -1 | #DIV/0! | 1 | #DIV/0! |
| 1700009N14Rik 75471 | -1 | #DIV/0! | 1 | #DIV/0! |
| Snord89 100217461   | -1 | #DIV/0! | 1 | #DIV/0! |
| Mir3103 100526559   | -1 | #DIV/0! | 1 | #DIV/0! |
| Msx2 17702          | -1 | #DIV/0! | 1 | #DIV/0! |
| Clps 109791         | -1 | #DIV/0! | 1 | #DIV/0! |
| Th 21823            | -1 | #DIV/0! | 1 | #DIV/0! |
| Olfr790 258935      | -1 | #DIV/0! | 1 | #DIV/0! |
| Olfr596 100041187   | -1 | #DIV/0! | 1 | #DIV/0! |
| Fbxw18 546161       | -1 | #DIV/0! | 1 | #DIV/0! |
| Fbxw15 382105       | -1 | #DIV/0! | 1 | #DIV/0! |
| Cdk15 271697        | -1 | #DIV/0! | 1 | #DIV/0! |
| Olfr1305 258396     | -1 | #DIV/0! | 1 | #DIV/0! |
| Snora62 104433      | -1 | #DIV/0! | 1 | #DIV/0! |
| Doxl2 243376        | -1 | #DIV/0! | 1 | #DIV/0! |
| Gm13871 667780      | -1 | #DIV/0! | 1 | #DIV/0! |
| Sox2ot 320478       | -1 | #DIV/0! | 1 | #DIV/0! |
| Olfr1023 258580     | -1 | #DIV/0! | 1 | #DIV/0! |
| Mir485 723875       | -1 | #DIV/0! | 1 | #DIV/0! |
| Tshb 22094          | -1 | #DIV/0! | 1 | #DIV/0! |
| Gm5878 545861       | -1 | #DIV/0! | 1 | #DIV/0! |
| Gm9733 751864       | -1 | #DIV/0! | 1 | #DIV/0! |
| Gm10471 100039045   | -1 | #DIV/0! | 1 | #DIV/0! |
| Olfr476 258926      | -1 | #DIV/0! | 1 | #DIV/0! |
| Celf6 76183         | -1 | #DIV/0! | 1 | #DIV/0! |
| Lhfpl1 237091       | -1 | #DIV/0! | 1 | #DIV/0! |



|                      |    |         |   |         |
|----------------------|----|---------|---|---------|
| Gpr26 233919         | -1 | #DIV/0! | 1 | #DIV/0! |
| Cyp27b1 13115        | -1 | #DIV/0! | 1 | #DIV/0! |
| Ccdc36 434438        | -1 | #DIV/0! | 1 | #DIV/0! |
| Kcnc2 268345         | -1 | #DIV/0! | 1 | #DIV/0! |
| Pabpc5 93728         | -1 | #DIV/0! | 1 | #DIV/0! |
| Olfr675 258147       | -1 | #DIV/0! | 1 | #DIV/0! |
| Nhs 195727           | -1 | #DIV/0! | 1 | #DIV/0! |
| 1700049L16Rik 108950 | -1 | #DIV/0! | 1 | #DIV/0! |
| 1700029F12Rik 66479  | -1 | #DIV/0! | 1 | #DIV/0! |
| Amy2a5 109959        | -1 | #DIV/0! | 1 | #DIV/0! |
| Olfr44 18343         | -1 | #DIV/0! | 1 | #DIV/0! |
| Gm5941 546347        | -1 | #DIV/0! | 1 | #DIV/0! |
| Elavl4 15572         | -1 | #DIV/0! | 1 | #DIV/0! |
| 6330407A03Rik 70720  | -1 | #DIV/0! | 1 | #DIV/0! |
| Mir24-2 723960       | -1 | #DIV/0! | 1 | #DIV/0! |
| Zfy1 22767           | -1 | #DIV/0! | 1 | #DIV/0! |
| Slc35f4 75288        | -1 | #DIV/0! | 1 | #DIV/0! |
| Olfr568 259095       | -1 | #DIV/0! | 1 | #DIV/0! |
| Gm6034 547347        | -1 | #DIV/0! | 1 | #DIV/0! |
| Gm5938 546335        | -1 | #DIV/0! | 1 | #DIV/0! |
| Krtap4-6 68768       | -1 | #DIV/0! | 1 | #DIV/0! |
| Olfr160 80706        | -1 | #DIV/0! | 1 | #DIV/0! |
| Pou3f3 18993         | -1 | #DIV/0! | 1 | #DIV/0! |
| Rbp2 19660           | -1 | #DIV/0! | 1 | #DIV/0! |
| Gm9268 668612        | -1 | #DIV/0! | 1 | #DIV/0! |
| Olfr600 259048       | -1 | #DIV/0! | 1 | #DIV/0! |
| Zim3 116811          | -1 | #DIV/0! | 1 | #DIV/0! |
| St8sia5 225742       | -1 | #DIV/0! | 1 | #DIV/0! |
| Npw 381073           | -1 | #DIV/0! | 1 | #DIV/0! |
| Gm15217 100041724    | -1 | #DIV/0! | 1 | #DIV/0! |
| Pom12112 195236      | -1 | #DIV/0! | 1 | #DIV/0! |
| Olfr109 258832       | -1 | #DIV/0! | 1 | #DIV/0! |
| Gm9524 671232        | -1 | #DIV/0! | 1 | #DIV/0! |
| Obp1a 18249          | -1 | #DIV/0! | 1 | #DIV/0! |
| Olfr1265 258340      | -1 | #DIV/0! | 1 | #DIV/0! |
| Olfr1094 258362      | -1 | #DIV/0! | 1 | #DIV/0! |
| Olfr975 258825       | -1 | #DIV/0! | 1 | #DIV/0! |
| Mir181a-1 735252     | -1 | #DIV/0! | 1 | #DIV/0! |
| E330013P04Rik 107376 | -1 | #DIV/0! | 1 | #DIV/0! |
| Birc7 329581         | -1 | #DIV/0! | 1 | #DIV/0! |
| Olfr1278 258389      | -1 | #DIV/0! | 1 | #DIV/0! |
| Olfr1320 236784      | -1 | #DIV/0! | 1 | #DIV/0! |
| Sult2b1 54200        | -1 | #DIV/0! | 1 | #DIV/0! |
| Speer8-ps1 74062     | -1 | #DIV/0! | 1 | #DIV/0! |
| Acvr1c 269275        | -1 | #DIV/0! | 1 | #DIV/0! |
| Cd70 21948           | -1 | #DIV/0! | 1 | #DIV/0! |
| Taar9 503558         | -1 | #DIV/0! | 1 | #DIV/0! |
| Il31ra 218624        | -1 | #DIV/0! | 1 | #DIV/0! |
| Csn1s1 12990         | -1 | #DIV/0! | 1 | #DIV/0! |
| 4921528O07Rik 78258  | -1 | #DIV/0! | 1 | #DIV/0! |
| Syng3 20974          | -1 | #DIV/0! | 1 | #DIV/0! |
| Mmp21 214766         | -1 | #DIV/0! | 1 | #DIV/0! |
| Mir7-2 723884        | -1 | #DIV/0! | 1 | #DIV/0! |

|                      |    |         |   |         |
|----------------------|----|---------|---|---------|
| Ms4a3 170813         | -1 | #DIV/0! | 1 | #DIV/0! |
| Olfr1394 258273      | -1 | #DIV/0! | 1 | #DIV/0! |
| Olfr1309 258439      | -1 | #DIV/0! | 1 | #DIV/0! |
| Slco6c1 74441        | -1 | #DIV/0! | 1 | #DIV/0! |
| Clca4 229927         | -1 | #DIV/0! | 1 | #DIV/0! |
| Vmn1r227 171229      | -1 | #DIV/0! | 1 | #DIV/0! |
| Olfr262 258683       | -1 | #DIV/0! | 1 | #DIV/0! |
| Mir186 387181        | -1 | #DIV/0! | 1 | #DIV/0! |
| Mgat4c 67569         | -1 | #DIV/0! | 1 | #DIV/0! |
| C86187 97402         | -1 | #DIV/0! | 1 | #DIV/0! |
| Olfr792 258150       | -1 | #DIV/0! | 1 | #DIV/0! |
| Mir326 723840        | -1 | #DIV/0! | 1 | #DIV/0! |
| Olfr33 18332         | -1 | #DIV/0! | 1 | #DIV/0! |
| Olfr913 258225       | -1 | #DIV/0! | 1 | #DIV/0! |
| Skint5 242627        | -1 | #DIV/0! | 1 | #DIV/0! |
| Fgf5 14176           | -1 | #DIV/0! | 1 | #DIV/0! |
| Klk1b21 16616        | -1 | #DIV/0! | 1 | #DIV/0! |
| Olfr26 18324         | -1 | #DIV/0! | 1 | #DIV/0! |
| Gpr158 241263        | -1 | #DIV/0! | 1 | #DIV/0! |
| Olfr547 259083       | -1 | #DIV/0! | 1 | #DIV/0! |
| Ifna14 404549        | -1 | #DIV/0! | 1 | #DIV/0! |
| Crygf 12969          | -1 | #DIV/0! | 1 | #DIV/0! |
| Fpr3 14294           | -1 | #DIV/0! | 1 | #DIV/0! |
| Olfr1208 258774      | -1 | #DIV/0! | 1 | #DIV/0! |
| Itgb1bp3 69564       | -1 | #DIV/0! | 1 | #DIV/0! |
| Vmn2r92 627111       | -1 | #DIV/0! | 1 | #DIV/0! |
| Lhx1 16869           | -1 | #DIV/0! | 1 | #DIV/0! |
| Nppc 18159           | -1 | #DIV/0! | 1 | #DIV/0! |
| Olfr303 258612       | -1 | #DIV/0! | 1 | #DIV/0! |
| Tgm5 74176           | -1 | #DIV/0! | 1 | #DIV/0! |
| Cyp2j11 100066       | -1 | #DIV/0! | 1 | #DIV/0! |
| Mtag2 50994          | -1 | #DIV/0! | 1 | #DIV/0! |
| 1700019M22Rik 69423  | -1 | #DIV/0! | 1 | #DIV/0! |
| Ppp1r14d 72112       | -1 | #DIV/0! | 1 | #DIV/0! |
| Ferd3l 114712        | -1 | #DIV/0! | 1 | #DIV/0! |
| Ceacam20 71601       | -1 | #DIV/0! | 1 | #DIV/0! |
| Nlrp4f 97895         | -1 | #DIV/0! | 1 | #DIV/0! |
| 9330158H04Rik 319472 | -1 | #DIV/0! | 1 | #DIV/0! |
| Fam184b 58227        | -1 | #DIV/0! | 1 | #DIV/0! |
| Tmem28 620592        | -1 | #DIV/0! | 1 | #DIV/0! |
| Gm2663 100040208     | -1 | #DIV/0! | 1 | #DIV/0! |
| Trim66 330627        | -1 | #DIV/0! | 1 | #DIV/0! |
| Olfr980 259110       | -1 | #DIV/0! | 1 | #DIV/0! |
| Slc14a2 27411        | -1 | #DIV/0! | 1 | #DIV/0! |
| Olfr1104 258763      | -1 | #DIV/0! | 1 | #DIV/0! |
| Cxcr1 227288         | -1 | #DIV/0! | 1 | #DIV/0! |
| Reg1 19692           | -1 | #DIV/0! | 1 | #DIV/0! |
| 4931428L18Rik 70988  | -1 | #DIV/0! | 1 | #DIV/0! |
| Fgf17 14171          | -1 | #DIV/0! | 1 | #DIV/0! |
| Cypt14 664704        | -1 | #DIV/0! | 1 | #DIV/0! |
| Mir3083 100526534    | -1 | #DIV/0! | 1 | #DIV/0! |
| Vmn1r176 546943      | -1 | #DIV/0! | 1 | #DIV/0! |
| Mir26a-1 387218      | -1 | #DIV/0! | 1 | #DIV/0! |

|                         |    |         |   |         |
|-------------------------|----|---------|---|---------|
| D6Ertd474e 52285        | -1 | #DIV/0! | 1 | #DIV/0! |
| Vmn2r52 384534          | -1 | #DIV/0! | 1 | #DIV/0! |
| Olfr113 258286          | -1 | #DIV/0! | 1 | #DIV/0! |
| Actl7a 11470            | -1 | #DIV/0! | 1 | #DIV/0! |
| Mpped1 223726           | -1 | #DIV/0! | 1 | #DIV/0! |
| Krtap6-2 16701          | -1 | #DIV/0! | 1 | #DIV/0! |
| Dcdc2b 667452           | -1 | #DIV/0! | 1 | #DIV/0! |
| Smok2a 27263            | -1 | #DIV/0! | 1 | #DIV/0! |
| S100a3 20197            | -1 | #DIV/0! | 1 | #DIV/0! |
| Mir1967 100316819       | -1 | #DIV/0! | 1 | #DIV/0! |
| Dpy19l2 320752          | -1 | #DIV/0! | 1 | #DIV/0! |
| Ang2 11731              | -1 | #DIV/0! | 1 | #DIV/0! |
| Abhd16b 241850          | -1 | #DIV/0! | 1 | #DIV/0! |
| Abpa 11354              | -1 | #DIV/0! | 1 | #DIV/0! |
| Olfr1079 258402         | -1 | #DIV/0! | 1 | #DIV/0! |
| Reg3d 30053             | -1 | #DIV/0! | 1 | #DIV/0! |
| Gm5065 272350           | -1 | #DIV/0! | 1 | #DIV/0! |
| 4933406l18Rik 71045     | -1 | #DIV/0! | 1 | #DIV/0! |
| Olfr1032 258572         | -1 | #DIV/0! | 1 | #DIV/0! |
| Arntl2 272322           | -1 | #DIV/0! | 1 | #DIV/0! |
| Vmn2r13 231589          | -1 | #DIV/0! | 1 | #DIV/0! |
| AA619741 241051         | -1 | #DIV/0! | 1 | #DIV/0! |
| Pcdhb19 93890           | -1 | #DIV/0! | 1 | #DIV/0! |
| Krtap5-2 71623          | -1 | #DIV/0! | 1 | #DIV/0! |
| Olfr361 258365          | -1 | #DIV/0! | 1 | #DIV/0! |
| Il1f5 54450             | -1 | #DIV/0! | 1 | #DIV/0! |
| Scel 64929              | -1 | #DIV/0! | 1 | #DIV/0! |
| Hist1h3i 319153         | -1 | #DIV/0! | 1 | #DIV/0! |
| Mir676 751534           | -1 | #DIV/0! | 1 | #DIV/0! |
| Mir30b 387226           | -1 | #DIV/0! | 1 | #DIV/0! |
| 1700007B14Rik 71831     | -1 | #DIV/0! | 1 | #DIV/0! |
| Zfp458 238690           | -1 | #DIV/0! | 1 | #DIV/0! |
| Tmprss3 140765          | -1 | #DIV/0! | 1 | #DIV/0! |
| Ankrd45 73844           | -1 | #DIV/0! | 1 | #DIV/0! |
| Vmn1r75 171241          | -1 | #DIV/0! | 1 | #DIV/0! |
| Cypt4 235067            | -1 | #DIV/0! | 1 | #DIV/0! |
| Nkx2-2 18088            | -1 | #DIV/0! | 1 | #DIV/0! |
| Mir374 751546           | -1 | #DIV/0! | 1 | #DIV/0! |
| Lrr1 69706              | -1 | #DIV/0! | 1 | #DIV/0! |
| Olfr122 258285          | -1 | #DIV/0! | 1 | #DIV/0! |
| Mir759 791080           | -1 | #DIV/0! | 1 | #DIV/0! |
| Rp1l1 271209            | -1 | #DIV/0! | 1 | #DIV/0! |
| Ptcra 19208             | -1 | #DIV/0! | 1 | #DIV/0! |
| Cypt1 66742             | -1 | #DIV/0! | 1 | #DIV/0! |
| Egam-1c 100047130       | -1 | #DIV/0! | 1 | #DIV/0! |
| Mov10l1 83456           | -1 | #DIV/0! | 1 | #DIV/0! |
| Spock1 20745            | -1 | #DIV/0! | 1 | #DIV/0! |
| Bex6 328660             | -1 | #DIV/0! | 1 | #DIV/0! |
| Tas2r113 387345         | -1 | #DIV/0! | 1 | #DIV/0! |
| Fam155a 270028          | -1 | #DIV/0! | 1 | #DIV/0! |
| C130080G10Rik 100303644 | -1 | #DIV/0! | 1 | #DIV/0! |
| Fbxl13 320118           | -1 | #DIV/0! | 1 | #DIV/0! |
| D030025P21Rik 100303738 | -1 | #DIV/0! | 1 | #DIV/0! |

|                      |    |         |   |         |
|----------------------|----|---------|---|---------|
| Vmn2r9 435864        | -1 | #DIV/0! | 1 | #DIV/0! |
| Olfr527 257939       | -1 | #DIV/0! | 1 | #DIV/0! |
| 9430076C15Rik 320189 | -1 | #DIV/0! | 1 | #DIV/0! |
| Olfr642 258326       | -1 | #DIV/0! | 1 | #DIV/0! |
| Mir216b 735308       | -1 | #DIV/0! | 1 | #DIV/0! |
| Gm4846 226601        | -1 | #DIV/0! | 1 | #DIV/0! |
| Olfr784 258724       | -1 | #DIV/0! | 1 | #DIV/0! |
| Rlbp1 19771          | -1 | #DIV/0! | 1 | #DIV/0! |
| Mir30e 723836        | -1 | #DIV/0! | 1 | #DIV/0! |
| H2afb1 68231         | -1 | #DIV/0! | 1 | #DIV/0! |
| Foxr2 436240         | -1 | #DIV/0! | 1 | #DIV/0! |
| Gucy1a2 234889       | -1 | #DIV/0! | 1 | #DIV/0! |
| Tmem121 69195        | -1 | #DIV/0! | 1 | #DIV/0! |
| 9530053A07Rik 319482 | -1 | #DIV/0! | 1 | #DIV/0! |
| Pcdha8 353235        | -1 | #DIV/0! | 1 | #DIV/0! |
| Rgs6 50779           | -1 | #DIV/0! | 1 | #DIV/0! |
| Krt4 16682           | -1 | #DIV/0! | 1 | #DIV/0! |
| St18 240690          | -1 | #DIV/0! | 1 | #DIV/0! |
| Zkscan2 210162       | -1 | #DIV/0! | 1 | #DIV/0! |
| Vmn1r171 81012       | -1 | #DIV/0! | 1 | #DIV/0! |
| Ppp1r1c 75276        | -1 | #DIV/0! | 1 | #DIV/0! |
| Atoh7 53404          | -1 | #DIV/0! | 1 | #DIV/0! |
| Olfr1157 258846      | -1 | #DIV/0! | 1 | #DIV/0! |
| Erv3 71995           | -1 | #DIV/0! | 1 | #DIV/0! |
| Lhx5 16873           | -1 | #DIV/0! | 1 | #DIV/0! |
| Mnx1 15285           | -1 | #DIV/0! | 1 | #DIV/0! |
| Ifnb1 15977          | -1 | #DIV/0! | 1 | #DIV/0! |
| Gm4975 244495        | -1 | #DIV/0! | 1 | #DIV/0! |
| Piwil4 330890        | -1 | #DIV/0! | 1 | #DIV/0! |
| Pth2 114640          | -1 | #DIV/0! | 1 | #DIV/0! |
| Olfr1331 258159      | -1 | #DIV/0! | 1 | #DIV/0! |
| Mir718 751533        | -1 | #DIV/0! | 1 | #DIV/0! |
| Cox8c 75483          | -1 | #DIV/0! | 1 | #DIV/0! |
| D930020B18Rik 216393 | -1 | #DIV/0! | 1 | #DIV/0! |
| Dhrs7c 68460         | -1 | #DIV/0! | 1 | #DIV/0! |
| Cdh23 22295          | -1 | #DIV/0! | 1 | #DIV/0! |
| Mir1932 100316690    | -1 | #DIV/0! | 1 | #DIV/0! |
| Gm11595 100040276    | -1 | #DIV/0! | 1 | #DIV/0! |
| Scml2 107815         | -1 | #DIV/0! | 1 | #DIV/0! |
| Cstl1 228756         | -1 | #DIV/0! | 1 | #DIV/0! |
| Klk4 56640           | -1 | #DIV/0! | 1 | #DIV/0! |
| Olfr1230 258785      | -1 | #DIV/0! | 1 | #DIV/0! |
| Mir669c 735273       | -1 | #DIV/0! | 1 | #DIV/0! |
| E030002O03Rik 244180 | -1 | #DIV/0! | 1 | #DIV/0! |
| Gm5712 435755        | -1 | #DIV/0! | 1 | #DIV/0! |
| Gm4792 215472        | -1 | #DIV/0! | 1 | #DIV/0! |
| Vmn2r107 22312       | -1 | #DIV/0! | 1 | #DIV/0! |
| Mir1937a 100316692   | -1 | #DIV/0! | 1 | #DIV/0! |
| Tnn 329278           | -1 | #DIV/0! | 1 | #DIV/0! |
| Mir24-1 387142       | -1 | #DIV/0! | 1 | #DIV/0! |
| Adamts18 208936      | -1 | #DIV/0! | 1 | #DIV/0! |
| Sycp2 320558         | -1 | #DIV/0! | 1 | #DIV/0! |
| Vmn1r46 113856       | -1 | #DIV/0! | 1 | #DIV/0! |

|                      |    |         |   |         |
|----------------------|----|---------|---|---------|
| Vmn1r85 252909       | -1 | #DIV/0! | 1 | #DIV/0! |
| E330014E10Rik 665943 | -1 | #DIV/0! | 1 | #DIV/0! |
| 1700034E13Rik 78414  | -1 | #DIV/0! | 1 | #DIV/0! |
| Lipi 320355          | -1 | #DIV/0! | 1 | #DIV/0! |
| Rps6ka6 67071        | -1 | #DIV/0! | 1 | #DIV/0! |
| Vmn1r47 113846       | -1 | #DIV/0! | 1 | #DIV/0! |
| Olfr513 258718       | -1 | #DIV/0! | 1 | #DIV/0! |
| Slitrk5 75409        | -1 | #DIV/0! | 1 | #DIV/0! |
| Myh1 17879           | -1 | #DIV/0! | 1 | #DIV/0! |
| Oxtr 18430           | -1 | #DIV/0! | 1 | #DIV/0! |
| 4930550C14Rik 75311  | -1 | #DIV/0! | 1 | #DIV/0! |
| C030023E24Rik 320247 | -1 | #DIV/0! | 1 | #DIV/0! |
| 4930451I11Rik 78118  | -1 | #DIV/0! | 1 | #DIV/0! |
| Slc22a22 210463      | -1 | #DIV/0! | 1 | #DIV/0! |
| Izumo2 75510         | -1 | #DIV/0! | 1 | #DIV/0! |
| Isir2 320563         | -1 | #DIV/0! | 1 | #DIV/0! |
| Kdm4d 244694         | -1 | #DIV/0! | 1 | #DIV/0! |
| 1700090G07Rik 78469  | -1 | #DIV/0! | 1 | #DIV/0! |
| Sp9 381373           | -1 | #DIV/0! | 1 | #DIV/0! |
| Taar3 493809         | -1 | #DIV/0! | 1 | #DIV/0! |
| Gm1631 381371        | -1 | #DIV/0! | 1 | #DIV/0! |
| Cyp4x1 81906         | -1 | #DIV/0! | 1 | #DIV/0! |
| Gm5168 382275        | -1 | #DIV/0! | 1 | #DIV/0! |
| Pax7 18509           | -1 | #DIV/0! | 1 | #DIV/0! |
| Fap 14089            | -1 | #DIV/0! | 1 | #DIV/0! |
| Gm5334 384639        | -1 | #DIV/0! | 1 | #DIV/0! |
| Gm5485 433023        | -1 | #DIV/0! | 1 | #DIV/0! |
| Nrsn2 228777         | -1 | #DIV/0! | 1 | #DIV/0! |
| Olfr1153 258633      | -1 | #DIV/0! | 1 | #DIV/0! |
| Mir1186 100316666    | -1 | #DIV/0! | 1 | #DIV/0! |
| 1700001K19Rik 66323  | -1 | #DIV/0! | 1 | #DIV/0! |
| Olfr829 259070       | -1 | #DIV/0! | 1 | #DIV/0! |
| Gpr141 353346        | -1 | #DIV/0! | 1 | #DIV/0! |
| Uts2r 217369         | -1 | #DIV/0! | 1 | #DIV/0! |
| Sprr2h 20762         | -1 | #DIV/0! | 1 | #DIV/0! |
| 5830405N20Rik 67596  | -1 | #DIV/0! | 1 | #DIV/0! |
| Mir1900 100316681    | -1 | #DIV/0! | 1 | #DIV/0! |
| Vmn2r68-ps 620697    | -1 | #DIV/0! | 1 | #DIV/0! |
| Mir741 100049545     | -1 | #DIV/0! | 1 | #DIV/0! |
| Ccdc144b 241943      | -1 | #DIV/0! | 1 | #DIV/0! |
| Arl14 71619          | -1 | #DIV/0! | 1 | #DIV/0! |
| Mir1931 100316689    | -1 | #DIV/0! | 1 | #DIV/0! |
| Olfr1181 258060      | -1 | #DIV/0! | 1 | #DIV/0! |
| Zp3r 22789           | -1 | #DIV/0! | 1 | #DIV/0! |
| Mybph 53311          | -1 | #DIV/0! | 1 | #DIV/0! |
| Slc16a14 71781       | -1 | #DIV/0! | 1 | #DIV/0! |
| Mir3109 100526560    | -1 | #DIV/0! | 1 | #DIV/0! |
| 1700080O16Rik 74279  | -1 | #DIV/0! | 1 | #DIV/0! |
| Tnp1 21958           | -1 | #DIV/0! | 1 | #DIV/0! |
| Gm11128 100504710    | -1 | #DIV/0! | 1 | #DIV/0! |
| Pcdha1 116731        | -1 | #DIV/0! | 1 | #DIV/0! |
| Gm44 212952          | -1 | #DIV/0! | 1 | #DIV/0! |
| Olfr1337 258306      | -1 | #DIV/0! | 1 | #DIV/0! |

|                      |    |         |   |         |
|----------------------|----|---------|---|---------|
| Skint4 320640        | -1 | #DIV/0! | 1 | #DIV/0! |
| A230073K19Rik 613263 | -1 | #DIV/0! | 1 | #DIV/0! |
| Vmn2r2 100125586     | -1 | #DIV/0! | 1 | #DIV/0! |
| Olfr1324 258289      | -1 | #DIV/0! | 1 | #DIV/0! |
| Gm10267 100042855    | -1 | #DIV/0! | 1 | #DIV/0! |
| 4932425I24Rik 320214 | -1 | #DIV/0! | 1 | #DIV/0! |
| Pdia2 69191          | -1 | #DIV/0! | 1 | #DIV/0! |
| Hsfy2 71066          | -1 | #DIV/0! | 1 | #DIV/0! |
| Olfr770 258862       | -1 | #DIV/0! | 1 | #DIV/0! |
| Kcnd3 56543          | -1 | #DIV/0! | 1 | #DIV/0! |
| Olfr1469 258690      | -1 | #DIV/0! | 1 | #DIV/0! |
| Slc5a9 230612        | -1 | #DIV/0! | 1 | #DIV/0! |
| Olfr1499 258792      | -1 | #DIV/0! | 1 | #DIV/0! |
| Magea1 17137         | -1 | #DIV/0! | 1 | #DIV/0! |
| Vmn2r34 100042636    | -1 | #DIV/0! | 1 | #DIV/0! |
| Gm6927 628893        | -1 | #DIV/0! | 1 | #DIV/0! |
| Rhox3e 100135657     | -1 | #DIV/0! | 1 | #DIV/0! |
| Pcdhb6 93877         | -1 | #DIV/0! | 1 | #DIV/0! |
| Olfr1512 258424      | -1 | #DIV/0! | 1 | #DIV/0! |
| Nphs1 54631          | -1 | #DIV/0! | 1 | #DIV/0! |
| Krt83 406219         | -1 | #DIV/0! | 1 | #DIV/0! |
| Olfr1368 258527      | -1 | #DIV/0! | 1 | #DIV/0! |
| Vmn2r-ps54 75835     | -1 | #DIV/0! | 1 | #DIV/0! |
| Adam18 13524         | -1 | #DIV/0! | 1 | #DIV/0! |
| Olfr951 258046       | -1 | #DIV/0! | 1 | #DIV/0! |
| B3gat1 76898         | -1 | #DIV/0! | 1 | #DIV/0! |
| Olfr1178 258203      | -1 | #DIV/0! | 1 | #DIV/0! |
| Oas1e 231699         | -1 | #DIV/0! | 1 | #DIV/0! |
| Aicda 11628          | -1 | #DIV/0! | 1 | #DIV/0! |
| Krt85 53622          | -1 | #DIV/0! | 1 | #DIV/0! |
| Mir103-1 723824      | -1 | #DIV/0! | 1 | #DIV/0! |
| Fam46d 213449        | -1 | #DIV/0! | 1 | #DIV/0! |
| Mir452 723919        | -1 | #DIV/0! | 1 | #DIV/0! |
| Six1 20471           | -1 | #DIV/0! | 1 | #DIV/0! |
| Olfr765 544748       | -1 | #DIV/0! | 1 | #DIV/0! |
| Olfr313 258529       | -1 | #DIV/0! | 1 | #DIV/0! |
| 4933417G07Rik 71182  | -1 | #DIV/0! | 1 | #DIV/0! |
| 1700021F07Rik 72221  | -1 | #DIV/0! | 1 | #DIV/0! |
| Gm14459 546263       | -1 | #DIV/0! | 1 | #DIV/0! |
| Elovl4 83603         | -1 | #DIV/0! | 1 | #DIV/0! |
| Skint8 639774        | -1 | #DIV/0! | 1 | #DIV/0! |
| Olfr601 258311       | -1 | #DIV/0! | 1 | #DIV/0! |
| Lcn10 332578         | -1 | #DIV/0! | 1 | #DIV/0! |
| Pglyrp3 242100       | -1 | #DIV/0! | 1 | #DIV/0! |
| Mir30d 387228        | -1 | #DIV/0! | 1 | #DIV/0! |
| Kctd16 383348        | -1 | #DIV/0! | 1 | #DIV/0! |
| Kap 16483            | -1 | #DIV/0! | 1 | #DIV/0! |
| Vmn2r58 628422       | -1 | #DIV/0! | 1 | #DIV/0! |
| Clrn3 212070         | -1 | #DIV/0! | 1 | #DIV/0! |
| Zdhhc22 238331       | -1 | #DIV/0! | 1 | #DIV/0! |
| 2900052N01Rik 73040  | -1 | #DIV/0! | 1 | #DIV/0! |
| Slc45a1 242773       | -1 | #DIV/0! | 1 | #DIV/0! |
| Txndc3 73412         | -1 | #DIV/0! | 1 | #DIV/0! |

|                      |    |         |   |         |
|----------------------|----|---------|---|---------|
| Iqub 214704          | -1 | #DIV/0! | 1 | #DIV/0! |
| 1700007G11Rik 75784  | -1 | #DIV/0! | 1 | #DIV/0! |
| Olfr1377 258913      | -1 | #DIV/0! | 1 | #DIV/0! |
| Nlrp14 76858         | -1 | #DIV/0! | 1 | #DIV/0! |
| Hoxd9 15438          | -1 | #DIV/0! | 1 | #DIV/0! |
| Pitx2 18741          | -1 | #DIV/0! | 1 | #DIV/0! |
| Ifitm7 74482         | -1 | #DIV/0! | 1 | #DIV/0! |
| Mir149 387167        | -1 | #DIV/0! | 1 | #DIV/0! |
| Pira6 18729          | -1 | #DIV/0! | 1 | #DIV/0! |
| 1700026D11Rik 70371  | -1 | #DIV/0! | 1 | #DIV/0! |
| BC055111 242602      | -1 | #DIV/0! | 1 | #DIV/0! |
| Ldhc 16833           | -1 | #DIV/0! | 1 | #DIV/0! |
| 4930435E12Rik 74663  | -1 | #DIV/0! | 1 | #DIV/0! |
| 1700106J16Rik 74297  | -1 | #DIV/0! | 1 | #DIV/0! |
| 4921515J06Rik 66715  | -1 | #DIV/0! | 1 | #DIV/0! |
| B930007M17Rik 381476 | -1 | #DIV/0! | 1 | #DIV/0! |
| 1700065I17Rik 67343  | -1 | #DIV/0! | 1 | #DIV/0! |
| Panx3 208098         | -1 | #DIV/0! | 1 | #DIV/0! |
| Olfr299 257929       | -1 | #DIV/0! | 1 | #DIV/0! |
| AA792892 100554      | -1 | #DIV/0! | 1 | #DIV/0! |
| Mir195 387190        | -1 | #DIV/0! | 1 | #DIV/0! |
| Tgm6 241636          | -1 | #DIV/0! | 1 | #DIV/0! |
| Mrap2 244958         | -1 | #DIV/0! | 1 | #DIV/0! |
| Camk1g 215303        | -1 | #DIV/0! | 1 | #DIV/0! |
| 9830107B12Rik 328829 | -1 | #DIV/0! | 1 | #DIV/0! |
| Gm6696 626682        | -1 | #DIV/0! | 1 | #DIV/0! |
| Slc5a5 114479        | -1 | #DIV/0! | 1 | #DIV/0! |
| Megf10 70417         | -1 | #DIV/0! | 1 | #DIV/0! |
| Olfr25 18323         | -1 | #DIV/0! | 1 | #DIV/0! |
| Olfr206 258993       | -1 | #DIV/0! | 1 | #DIV/0! |
| Nox3 224480          | -1 | #DIV/0! | 1 | #DIV/0! |
| Crygd 12967          | -1 | #DIV/0! | 1 | #DIV/0! |
| Gfra3 14587          | -1 | #DIV/0! | 1 | #DIV/0! |
| Hoxc10 209448        | -1 | #DIV/0! | 1 | #DIV/0! |
| Gm15144 78092        | -1 | #DIV/0! | 1 | #DIV/0! |
| Pin1-ps1 241593      | -1 | #DIV/0! | 1 | #DIV/0! |
| Mir100 723892        | -1 | #DIV/0! | 1 | #DIV/0! |
| Gm3604 100041979     | -1 | #DIV/0! | 1 | #DIV/0! |
| Gm101 226356         | -1 | #DIV/0! | 1 | #DIV/0! |
| Gm4907 236749        | -1 | #DIV/0! | 1 | #DIV/0! |
| Tas2r103 667992      | -1 | #DIV/0! | 1 | #DIV/0! |
| Cxcl17 232983        | -1 | #DIV/0! | 1 | #DIV/0! |
| Pramel4 347710       | -1 | #DIV/0! | 1 | #DIV/0! |
| Snord52 100217427    | -1 | #DIV/0! | 1 | #DIV/0! |
| Olfr1176 258767      | -1 | #DIV/0! | 1 | #DIV/0! |
| Vmn1r83 171243       | -1 | #DIV/0! | 1 | #DIV/0! |
| Mir465 723888        | -1 | #DIV/0! | 1 | #DIV/0! |
| Lrrc55 241528        | -1 | #DIV/0! | 1 | #DIV/0! |
| A930038C07Rik 68169  | -1 | #DIV/0! | 1 | #DIV/0! |
| Tcp11 21463          | -1 | #DIV/0! | 1 | #DIV/0! |
| Olfr1317 258440      | -1 | #DIV/0! | 1 | #DIV/0! |
| Gsx1 14842           | -1 | #DIV/0! | 1 | #DIV/0! |
| Wdr95 381693         | -1 | #DIV/0! | 1 | #DIV/0! |

|                         |    |         |   |         |
|-------------------------|----|---------|---|---------|
| Vmn2r28 665255          | -1 | #DIV/0! | 1 | #DIV/0! |
| Rln1 19773              | -1 | #DIV/0! | 1 | #DIV/0! |
| Olfr373 258532          | -1 | #DIV/0! | 1 | #DIV/0! |
| Amy2a3 100043686        | -1 | #DIV/0! | 1 | #DIV/0! |
| Gif 14603               | -1 | #DIV/0! | 1 | #DIV/0! |
| Ctxn2 381418            | -1 | #DIV/0! | 1 | #DIV/0! |
| 5830411N06Rik 244234    | -1 | #DIV/0! | 1 | #DIV/0! |
| Olfr362 259053          | -1 | #DIV/0! | 1 | #DIV/0! |
| Adam6a 238406           | -1 | #DIV/0! | 1 | #DIV/0! |
| Fmo6 226565             | -1 | #DIV/0! | 1 | #DIV/0! |
| Vmn1r81 171244          | -1 | #DIV/0! | 1 | #DIV/0! |
| Phox2b 18935            | -1 | #DIV/0! | 1 | #DIV/0! |
| Olfr211 258914          | -1 | #DIV/0! | 1 | #DIV/0! |
| Vmn1r196 100312484      | -1 | #DIV/0! | 1 | #DIV/0! |
| 1810010D01Rik 100040049 | -1 | #DIV/0! | 1 | #DIV/0! |
| 4933401B06Rik 71011     | -1 | #DIV/0! | 1 | #DIV/0! |
| Rmst 110333             | -1 | #DIV/0! | 1 | #DIV/0! |
| Olfr283 259038          | -1 | #DIV/0! | 1 | #DIV/0! |
| Guca2a 14915            | -1 | #DIV/0! | 1 | #DIV/0! |
| St6galnac5 26938        | -1 | #DIV/0! | 1 | #DIV/0! |
| Gprin2 432839           | -1 | #DIV/0! | 1 | #DIV/0! |
| Catsper4 329954         | -1 | #DIV/0! | 1 | #DIV/0! |
| Olfr1182 258167         | -1 | #DIV/0! | 1 | #DIV/0! |
| Xylt1 233781            | -1 | #DIV/0! | 1 | #DIV/0! |
| Psg25 114868            | -1 | #DIV/0! | 1 | #DIV/0! |
| Tfap2c 21420            | -1 | #DIV/0! | 1 | #DIV/0! |
| Al836003 239650         | -1 | #DIV/0! | 1 | #DIV/0! |
| Olfr497 258733          | -1 | #DIV/0! | 1 | #DIV/0! |
| Fbxw26 382109           | -1 | #DIV/0! | 1 | #DIV/0! |
| Hoxd3 15434             | -1 | #DIV/0! | 1 | #DIV/0! |
| Zbbx 213234             | -1 | #DIV/0! | 1 | #DIV/0! |
| Stfa3 20863             | -1 | #DIV/0! | 1 | #DIV/0! |
| Gm11190 791423          | -1 | #DIV/0! | 1 | #DIV/0! |
| Vmn1r113 436135         | -1 | #DIV/0! | 1 | #DIV/0! |
| Lrrc3b 218763           | -1 | #DIV/0! | 1 | #DIV/0! |
| Ceacam15 101434         | -1 | #DIV/0! | 1 | #DIV/0! |
| Rnf133 386611           | -1 | #DIV/0! | 1 | #DIV/0! |
| Mir3058 100526463       | -1 | #DIV/0! | 1 | #DIV/0! |
| Tekt3 71062             | -1 | #DIV/0! | 1 | #DIV/0! |
| Bpifc 270757            | -1 | #DIV/0! | 1 | #DIV/0! |
| Slc1a1 20510            | -1 | #DIV/0! | 1 | #DIV/0! |
| Olfr171 258960          | -1 | #DIV/0! | 1 | #DIV/0! |
| Wfdc15a 68221           | -1 | #DIV/0! | 1 | #DIV/0! |
| Ssx9 382206             | -1 | #DIV/0! | 1 | #DIV/0! |
| Synpr 72003             | -1 | #DIV/0! | 1 | #DIV/0! |
| Clec4b2 381809          | -1 | #DIV/0! | 1 | #DIV/0! |
| Olfr943 258323          | -1 | #DIV/0! | 1 | #DIV/0! |
| 4930442L01Rik 67583     | -1 | #DIV/0! | 1 | #DIV/0! |
| Olfr609 259086          | -1 | #DIV/0! | 1 | #DIV/0! |
| Vmn2r95 328759          | -1 | #DIV/0! | 1 | #DIV/0! |
| Taar8b 382348           | -1 | #DIV/0! | 1 | #DIV/0! |
| Olfr248 258709          | -1 | #DIV/0! | 1 | #DIV/0! |
| Olfr606 259098          | -1 | #DIV/0! | 1 | #DIV/0! |



|                      |    |         |   |         |
|----------------------|----|---------|---|---------|
| Vmn1r32 171188       | -1 | #DIV/0! | 1 | #DIV/0! |
| Olfr23 18321         | -1 | #DIV/0! | 1 | #DIV/0! |
| Pnmal2 434128        | -1 | #DIV/0! | 1 | #DIV/0! |
| Diap3 56419          | -1 | #DIV/0! | 1 | #DIV/0! |
| Aqp2 11827           | -1 | #DIV/0! | 1 | #DIV/0! |
| Olfr520 259066       | -1 | #DIV/0! | 1 | #DIV/0! |
| BC048502 223927      | -1 | #DIV/0! | 1 | #DIV/0! |
| Dcc 13176            | -1 | #DIV/0! | 1 | #DIV/0! |
| Prr23a 623166        | -1 | #DIV/0! | 1 | #DIV/0! |
| Olfr890 258474       | -1 | #DIV/0! | 1 | #DIV/0! |
| Pnliprp2 18947       | -1 | #DIV/0! | 1 | #DIV/0! |
| Crispld1 83691       | -1 | #DIV/0! | 1 | #DIV/0! |
| Mir3059 100526516    | -1 | #DIV/0! | 1 | #DIV/0! |
| BC051019 57355       | -1 | #DIV/0! | 1 | #DIV/0! |
| Olfr1325 258393      | -1 | #DIV/0! | 1 | #DIV/0! |
| Havcr1 171283        | -1 | #DIV/0! | 1 | #DIV/0! |
| Sema3a 20346         | -1 | #DIV/0! | 1 | #DIV/0! |
| 4930592I03Rik 75853  | -1 | #DIV/0! | 1 | #DIV/0! |
| Mir344d-3 100526543  | -1 | #DIV/0! | 1 | #DIV/0! |
| Gm5134 333669        | -1 | #DIV/0! | 1 | #DIV/0! |
| Lce3f 69520          | -1 | #DIV/0! | 1 | #DIV/0! |
| Grpr 14829           | -1 | #DIV/0! | 1 | #DIV/0! |
| Krt12 268482         | -1 | #DIV/0! | 1 | #DIV/0! |
| Olfr923 258812       | -1 | #DIV/0! | 1 | #DIV/0! |
| Gpr83 14608          | -1 | #DIV/0! | 1 | #DIV/0! |
| Fpr-rs3 14290        | -1 | #DIV/0! | 1 | #DIV/0! |
| Snord12 100217443    | -1 | #DIV/0! | 1 | #DIV/0! |
| Gm4906 236663        | -1 | #DIV/0! | 1 | #DIV/0! |
| Kcnj3 16519          | -1 | #DIV/0! | 1 | #DIV/0! |
| Amy2b 545562         | -1 | #DIV/0! | 1 | #DIV/0! |
| Lep 16846            | -1 | #DIV/0! | 1 | #DIV/0! |
| Olfr1258 258980      | -1 | #DIV/0! | 1 | #DIV/0! |
| Olfr228 258400       | -1 | #DIV/0! | 1 | #DIV/0! |
| Olfr126 258892       | -1 | #DIV/0! | 1 | #DIV/0! |
| Rhox4a 664609        | -1 | #DIV/0! | 1 | #DIV/0! |
| Cyp11b1 110115       | -1 | #DIV/0! | 1 | #DIV/0! |
| Kcns1 16538          | -1 | #DIV/0! | 1 | #DIV/0! |
| Ctsll3 70202         | -1 | #DIV/0! | 1 | #DIV/0! |
| Pcdhgb5 93702        | -1 | #DIV/0! | 1 | #DIV/0! |
| Apln 30878           | -1 | #DIV/0! | 1 | #DIV/0! |
| Pkhd1l1 192190       | -1 | #DIV/0! | 1 | #DIV/0! |
| Kbtbd5 72330         | -1 | #DIV/0! | 1 | #DIV/0! |
| Gm889 380755         | -1 | #DIV/0! | 1 | #DIV/0! |
| Areg 11839           | -1 | #DIV/0! | 1 | #DIV/0! |
| Olfr449 259067       | -1 | #DIV/0! | 1 | #DIV/0! |
| Olfr1123 258347      | -1 | #DIV/0! | 1 | #DIV/0! |
| Aknad1 329738        | -1 | #DIV/0! | 1 | #DIV/0! |
| 2310034C09Rik 117172 | -1 | #DIV/0! | 1 | #DIV/0! |
| L3mbtl1 241764       | -1 | #DIV/0! | 1 | #DIV/0! |
| Ano7 404545          | -1 | #DIV/0! | 1 | #DIV/0! |
| Mir543 723881        | -1 | #DIV/0! | 1 | #DIV/0! |
| Cdr1 631990          | -1 | #DIV/0! | 1 | #DIV/0! |
| Atp6v1b1 110935      | -1 | #DIV/0! | 1 | #DIV/0! |

|                     |    |         |   |         |
|---------------------|----|---------|---|---------|
| Phex 18675          | -1 | #DIV/0! | 1 | #DIV/0! |
| Spr2g 20761         | -1 | #DIV/0! | 1 | #DIV/0! |
| Vmn2r35 625353      | -1 | #DIV/0! | 1 | #DIV/0! |
| Ankrd60 70065       | -1 | #DIV/0! | 1 | #DIV/0! |
| Olfr1247 258968     | -1 | #DIV/0! | 1 | #DIV/0! |
| Gm13939 100038454   | -1 | #DIV/0! | 1 | #DIV/0! |
| Mcpt1 17224         | -1 | #DIV/0! | 1 | #DIV/0! |
| Cmtm2b 75502        | -1 | #DIV/0! | 1 | #DIV/0! |
| Olfr136 258803      | -1 | #DIV/0! | 1 | #DIV/0! |
| Oosp1 170834        | -1 | #DIV/0! | 1 | #DIV/0! |
| Mir135b 723818      | -1 | #DIV/0! | 1 | #DIV/0! |
| Tsix 22097          | -1 | #DIV/0! | 1 | #DIV/0! |
| Mir137 387155       | -1 | #DIV/0! | 1 | #DIV/0! |
| Gfral 404194        | -1 | #DIV/0! | 1 | #DIV/0! |
| Mir872 100124456    | -1 | #DIV/0! | 1 | #DIV/0! |
| Bpifb1 228801       | -1 | #DIV/0! | 1 | #DIV/0! |
| Pkd2l1 329064       | -1 | #DIV/0! | 1 | #DIV/0! |
| Ppp1r17 19051       | -1 | #DIV/0! | 1 | #DIV/0! |
| Defa3 13237         | -1 | #DIV/0! | 1 | #DIV/0! |
| Spats1 71020        | -1 | #DIV/0! | 1 | #DIV/0! |
| Olfr8 18372         | -1 | #DIV/0! | 1 | #DIV/0! |
| Gm5494 433107       | -1 | #DIV/0! | 1 | #DIV/0! |
| Rasgef1a 70727      | -1 | #DIV/0! | 1 | #DIV/0! |
| Palm2 242481        | -1 | #DIV/0! | 1 | #DIV/0! |
| Gm16442 620401      | -1 | #DIV/0! | 1 | #DIV/0! |
| Olfr116 258625      | -1 | #DIV/0! | 1 | #DIV/0! |
| Rbp3 19661          | -1 | #DIV/0! | 1 | #DIV/0! |
| Olfr700 258593      | -1 | #DIV/0! | 1 | #DIV/0! |
| Gm17495 100126778   | -1 | #DIV/0! | 1 | #DIV/0! |
| Cadm2 239857        | -1 | #DIV/0! | 1 | #DIV/0! |
| Lbx1 16814          | -1 | #DIV/0! | 1 | #DIV/0! |
| Tas2r118 387347     | -1 | #DIV/0! | 1 | #DIV/0! |
| Slc22a2 20518       | -1 | #DIV/0! | 1 | #DIV/0! |
| Il18rap 16174       | -1 | #DIV/0! | 1 | #DIV/0! |
| Naaladl1 381204     | -1 | #DIV/0! | 1 | #DIV/0! |
| Bpifb3 378700       | -1 | #DIV/0! | 1 | #DIV/0! |
| Vmn2r113 434701     | -1 | #DIV/0! | 1 | #DIV/0! |
| Olfr98 258503       | -1 | #DIV/0! | 1 | #DIV/0! |
| Olfr1126 258834     | -1 | #DIV/0! | 1 | #DIV/0! |
| Olfr881 258413      | -1 | #DIV/0! | 1 | #DIV/0! |
| Olfr649 259057      | -1 | #DIV/0! | 1 | #DIV/0! |
| 1700061J05Rik 73376 | -1 | #DIV/0! | 1 | #DIV/0! |
| G6b 114763          | -1 | #DIV/0! | 1 | #DIV/0! |
| Prss37 67690        | -1 | #DIV/0! | 1 | #DIV/0! |
| Olfr490 258491      | -1 | #DIV/0! | 1 | #DIV/0! |
| Boll 75388          | -1 | #DIV/0! | 1 | #DIV/0! |
| Vmn1r200 171246     | -1 | #DIV/0! | 1 | #DIV/0! |
| Tmem74 239408       | -1 | #DIV/0! | 1 | #DIV/0! |
| Mir379 723858       | -1 | #DIV/0! | 1 | #DIV/0! |
| Snora28 100316932   | -1 | #DIV/0! | 1 | #DIV/0! |
| 4930404A10Rik 74847 | -1 | #DIV/0! | 1 | #DIV/0! |
| Cbln2 12405         | -1 | #DIV/0! | 1 | #DIV/0! |
| Mir1946a 100316697  | -1 | #DIV/0! | 1 | #DIV/0! |

|                         |    |         |   |         |
|-------------------------|----|---------|---|---------|
| Htr5a 15563             | -1 | #DIV/0! | 1 | #DIV/0! |
| Gm1141 382221           | -1 | #DIV/0! | 1 | #DIV/0! |
| Cacng3 54376            | -1 | #DIV/0! | 1 | #DIV/0! |
| Smpx 66106              | -1 | #DIV/0! | 1 | #DIV/0! |
| Slc5a2 246787           | -1 | #DIV/0! | 1 | #DIV/0! |
| Kcna3 16491             | -1 | #DIV/0! | 1 | #DIV/0! |
| Gm765 330390            | -1 | #DIV/0! | 1 | #DIV/0! |
| Gm13305 100042555       | -1 | #DIV/0! | 1 | #DIV/0! |
| Olf731 258360           | -1 | #DIV/0! | 1 | #DIV/0! |
| Fbxo43 78803            | -1 | #DIV/0! | 1 | #DIV/0! |
| Olf539 258963           | -1 | #DIV/0! | 1 | #DIV/0! |
| Wnt1 22408              | -1 | #DIV/0! | 1 | #DIV/0! |
| Sim2 20465              | -1 | #DIV/0! | 1 | #DIV/0! |
| Etv2 14008              | -1 | #DIV/0! | 1 | #DIV/0! |
| Hist1h2af 319173        | -1 | #DIV/0! | 1 | #DIV/0! |
| Crybb2 12961            | -1 | #DIV/0! | 1 | #DIV/0! |
| Olf12 257890            | -1 | #DIV/0! | 1 | #DIV/0! |
| Gm6455 623849           | -1 | #DIV/0! | 1 | #DIV/0! |
| Nhlh2 18072             | -1 | #DIV/0! | 1 | #DIV/0! |
| Lypd6b 71897            | -1 | #DIV/0! | 1 | #DIV/0! |
| Gm9767 100040851        | -1 | #DIV/0! | 1 | #DIV/0! |
| Chit1 71884             | -1 | #DIV/0! | 1 | #DIV/0! |
| Hoxd1 15429             | -1 | #DIV/0! | 1 | #DIV/0! |
| Svs3b 329557            | -1 | #DIV/0! | 1 | #DIV/0! |
| Tex24 541463            | -1 | #DIV/0! | 1 | #DIV/0! |
| Kcna2 98741             | -1 | #DIV/0! | 1 | #DIV/0! |
| Zpbp2 69376             | -1 | #DIV/0! | 1 | #DIV/0! |
| Olf60 18361             | -1 | #DIV/0! | 1 | #DIV/0! |
| Zscan5b 170734          | -1 | #DIV/0! | 1 | #DIV/0! |
| Asb11 68854             | -1 | #DIV/0! | 1 | #DIV/0! |
| Olf569 259092           | -1 | #DIV/0! | 1 | #DIV/0! |
| Higd1b 75689            | -1 | #DIV/0! | 1 | #DIV/0! |
| Olf309 258196           | -1 | #DIV/0! | 1 | #DIV/0! |
| Mir702 735283           | -1 | #DIV/0! | 1 | #DIV/0! |
| Tulp2 56734             | -1 | #DIV/0! | 1 | #DIV/0! |
| Olf229 258606           | -1 | #DIV/0! | 1 | #DIV/0! |
| Pramef12 77632          | -1 | #DIV/0! | 1 | #DIV/0! |
| Olf934 258434           | -1 | #DIV/0! | 1 | #DIV/0! |
| Olf357 258616           | -1 | #DIV/0! | 1 | #DIV/0! |
| Ssxb3 278174            | -1 | #DIV/0! | 1 | #DIV/0! |
| Defb35 246084           | -1 | #DIV/0! | 1 | #DIV/0! |
| Igfbp1b 50540           | -1 | #DIV/0! | 1 | #DIV/0! |
| Mir684-2 735261         | -1 | #DIV/0! | 1 | #DIV/0! |
| Gm10696 100043188       | -1 | #DIV/0! | 1 | #DIV/0! |
| Gria2 14800             | -1 | #DIV/0! | 1 | #DIV/0! |
| Aipl1 114230            | -1 | #DIV/0! | 1 | #DIV/0! |
| 5430421N21Rik 100126226 | -1 | #DIV/0! | 1 | #DIV/0! |
| Slc6a20b 22599          | -1 | #DIV/0! | 1 | #DIV/0! |
| Foxe3 30923             | -1 | #DIV/0! | 1 | #DIV/0! |
| Slc38a8 234788          | -1 | #DIV/0! | 1 | #DIV/0! |
| D130040H23Rik 211135    | -1 | #DIV/0! | 1 | #DIV/0! |
| Eif4e1b 218268          | -1 | #DIV/0! | 1 | #DIV/0! |
| Olf552 259106           | -1 | #DIV/0! | 1 | #DIV/0! |

|                         |    |         |   |         |
|-------------------------|----|---------|---|---------|
| Klra15 27423            | -1 | #DIV/0! | 1 | #DIV/0! |
| Gm5114 330513           | -1 | #DIV/0! | 1 | #DIV/0! |
| Syt13 80976             | -1 | #DIV/0! | 1 | #DIV/0! |
| Snord34 27210           | -1 | #DIV/0! | 1 | #DIV/0! |
| 1700025F22Rik 69416     | -1 | #DIV/0! | 1 | #DIV/0! |
| Pira11 18724            | -1 | #DIV/0! | 1 | #DIV/0! |
| Fer1l4 74562            | -1 | #DIV/0! | 1 | #DIV/0! |
| Speer6-ps1 73266        | -1 | #DIV/0! | 1 | #DIV/0! |
| Mir467f 100316749       | -1 | #DIV/0! | 1 | #DIV/0! |
| F630042J09Rik 100038627 | -1 | #DIV/0! | 1 | #DIV/0! |
| Atp6v1g3 338375         | -1 | #DIV/0! | 1 | #DIV/0! |
| Cabp7 192650            | -1 | #DIV/0! | 1 | #DIV/0! |
| Krtap4-16 435285        | -1 | #DIV/0! | 1 | #DIV/0! |
| Krt15 16665             | -1 | #DIV/0! | 1 | #DIV/0! |
| Krtap13-1 268905        | -1 | #DIV/0! | 1 | #DIV/0! |
| Snord67 100217458       | -1 | #DIV/0! | 1 | #DIV/0! |
| Galp 232836             | -1 | #DIV/0! | 1 | #DIV/0! |
| Mir762 791073           | -1 | #DIV/0! | 1 | #DIV/0! |
| Gm15056 100041654       | -1 | #DIV/0! | 1 | #DIV/0! |
| Cd40lg 21947            | -1 | #DIV/0! | 1 | #DIV/0! |
| Olfr1061 259022         | -1 | #DIV/0! | 1 | #DIV/0! |
| Foxd4 14237             | -1 | #DIV/0! | 1 | #DIV/0! |
| Gm6994 629678           | -1 | #DIV/0! | 1 | #DIV/0! |
| Vmn1r24 171191          | -1 | #DIV/0! | 1 | #DIV/0! |
| Ntng1 80883             | -1 | #DIV/0! | 1 | #DIV/0! |
| Adam2 11495             | -1 | #DIV/0! | 1 | #DIV/0! |
| Ankrd22 52024           | -1 | #DIV/0! | 1 | #DIV/0! |
| Htr2b 15559             | -1 | #DIV/0! | 1 | #DIV/0! |
| Spata18 73472           | -1 | #DIV/0! | 1 | #DIV/0! |
| Fam24a 68223            | -1 | #DIV/0! | 1 | #DIV/0! |
| Grm2 108068             | -1 | #DIV/0! | 1 | #DIV/0! |
| Olfr348 258946          | -1 | #DIV/0! | 1 | #DIV/0! |
| 2410012M07Rik 71979     | -1 | #DIV/0! | 1 | #DIV/0! |
| Fnd3c2 331491           | -1 | #DIV/0! | 1 | #DIV/0! |
| Atp6ap1l 435376         | -1 | #DIV/0! | 1 | #DIV/0! |
| Olfr43 258706           | -1 | #DIV/0! | 1 | #DIV/0! |
| Anxa10 26359            | -1 | #DIV/0! | 1 | #DIV/0! |
| Vmn1r123 384695         | -1 | #DIV/0! | 1 | #DIV/0! |
| Mcpt2 17225             | -1 | #DIV/0! | 1 | #DIV/0! |
| Olfr123 258623          | -1 | #DIV/0! | 1 | #DIV/0! |
| E230025N22Rik 240216    | -1 | #DIV/0! | 1 | #DIV/0! |
| Vmn2r80 624765          | -1 | #DIV/0! | 1 | #DIV/0! |
| 4930465K10Rik 67640     | -1 | #DIV/0! | 1 | #DIV/0! |
| 6330403K07Rik 103712    | -1 | #DIV/0! | 1 | #DIV/0! |
| Olfr1044 259013         | -1 | #DIV/0! | 1 | #DIV/0! |
| 4932411E22Rik 214604    | -1 | #DIV/0! | 1 | #DIV/0! |
| Olfr1200 257887         | -1 | #DIV/0! | 1 | #DIV/0! |
| Zcchc16 619287          | -1 | #DIV/0! | 1 | #DIV/0! |
| Hspb3 56534             | -1 | #DIV/0! | 1 | #DIV/0! |
| Vmn1r217 171273         | -1 | #DIV/0! | 1 | #DIV/0! |
| Olfr788 258544          | -1 | #DIV/0! | 1 | #DIV/0! |
| Pkd1l3 244646           | -1 | #DIV/0! | 1 | #DIV/0! |
| Rnase1 19752            | -1 | #DIV/0! | 1 | #DIV/0! |

|                     |    |         |   |         |
|---------------------|----|---------|---|---------|
| Gm1993 100038977    | -1 | #DIV/0! | 1 | #DIV/0! |
| Pnlip 69060         | -1 | #DIV/0! | 1 | #DIV/0! |
| Dctd 320685         | -1 | #DIV/0! | 1 | #DIV/0! |
| Slco6b1 67854       | -1 | #DIV/0! | 1 | #DIV/0! |
| Prl4a1 19110        | -1 | #DIV/0! | 1 | #DIV/0! |
| Olf1340 258301      | -1 | #DIV/0! | 1 | #DIV/0! |
| Gm17727 100312986   | -1 | #DIV/0! | 1 | #DIV/0! |
| Olf1198 404330      | -1 | #DIV/0! | 1 | #DIV/0! |
| Mmp13 17386         | -1 | #DIV/0! | 1 | #DIV/0! |
| Olf390 258344       | -1 | #DIV/0! | 1 | #DIV/0! |
| 8030411F24Rik 78609 | -1 | #DIV/0! | 1 | #DIV/0! |
| Mslnl 328783        | -1 | #DIV/0! | 1 | #DIV/0! |
| Ttc24 214191        | -1 | #DIV/0! | 1 | #DIV/0! |
| Slc5a8 216225       | -1 | #DIV/0! | 1 | #DIV/0! |
| Vmn2r83 625029      | -1 | #DIV/0! | 1 | #DIV/0! |
| Olf1018 258579      | -1 | #DIV/0! | 1 | #DIV/0! |
| H28 15061           | -1 | #DIV/0! | 1 | #DIV/0! |
| Mum1l1 245631       | -1 | #DIV/0! | 1 | #DIV/0! |
| Otol1 229389        | -1 | #DIV/0! | 1 | #DIV/0! |
| Trim71 636931       | -1 | #DIV/0! | 1 | #DIV/0! |
| Olf1392 258462      | -1 | #DIV/0! | 1 | #DIV/0! |
| 4933403O08Rik 71030 | -1 | #DIV/0! | 1 | #DIV/0! |
| Vmn2r114 666002     | -1 | #DIV/0! | 1 | #DIV/0! |
| Ppp2r2c 269643      | -1 | #DIV/0! | 1 | #DIV/0! |
| Olf703 258589       | -1 | #DIV/0! | 1 | #DIV/0! |
| 9430021M05Rik 77288 | -1 | #DIV/0! | 1 | #DIV/0! |
| 4930507D05Rik 74706 | -1 | #DIV/0! | 1 | #DIV/0! |
| Adam25 23793        | -1 | #DIV/0! | 1 | #DIV/0! |
| Gm4894 235327       | -1 | #DIV/0! | 1 | #DIV/0! |
| Speer2 224318       | -1 | #DIV/0! | 1 | #DIV/0! |
| Skint11 230623      | -1 | #DIV/0! | 1 | #DIV/0! |
| Pla2g10 26565       | -1 | #DIV/0! | 1 | #DIV/0! |
| Prss42 235628       | -1 | #DIV/0! | 1 | #DIV/0! |
| 4930415F15Rik 73862 | -1 | #DIV/0! | 1 | #DIV/0! |
| Pabpn1 382035       | -1 | #DIV/0! | 1 | #DIV/0! |
| Slc36a3 215332      | -1 | #DIV/0! | 1 | #DIV/0! |
| Vmn1r72 252905      | -1 | #DIV/0! | 1 | #DIV/0! |
| Olf304 258089       | -1 | #DIV/0! | 1 | #DIV/0! |
| Efcab3 70894        | -1 | #DIV/0! | 1 | #DIV/0! |
| Olf701 66786        | -1 | #DIV/0! | 1 | #DIV/0! |
| Olf339 258951       | -1 | #DIV/0! | 1 | #DIV/0! |
| Pcdhb11 93882       | -1 | #DIV/0! | 1 | #DIV/0! |
| BC100530 100034684  | -1 | #DIV/0! | 1 | #DIV/0! |
| Cntnap3 238680      | -1 | #DIV/0! | 1 | #DIV/0! |
| Dlg2 23859          | -1 | #DIV/0! | 1 | #DIV/0! |
| Olf921 258778       | -1 | #DIV/0! | 1 | #DIV/0! |
| Olf192 404309       | -1 | #DIV/0! | 1 | #DIV/0! |
| Fam150a 620393      | -1 | #DIV/0! | 1 | #DIV/0! |
| Gm10389 100038608   | -1 | #DIV/0! | 1 | #DIV/0! |
| Acer1 171168        | -1 | #DIV/0! | 1 | #DIV/0! |
| Sbpl 638345         | -1 | #DIV/0! | 1 | #DIV/0! |
| Trim52 212085       | -1 | #DIV/0! | 1 | #DIV/0! |
| Olf697 258592       | -1 | #DIV/0! | 1 | #DIV/0! |

|                     |    |         |   |         |
|---------------------|----|---------|---|---------|
| Opn5 353344         | -1 | #DIV/0! | 1 | #DIV/0! |
| Pcdhga6 93714       | -1 | #DIV/0! | 1 | #DIV/0! |
| Amelx 11704         | -1 | #DIV/0! | 1 | #DIV/0! |
| Tdpoz5 399676       | -1 | #DIV/0! | 1 | #DIV/0! |
| Fstl4 320027        | -1 | #DIV/0! | 1 | #DIV/0! |
| Gm15104 333588      | -1 | #DIV/0! | 1 | #DIV/0! |
| Vmn2r12 627569      | -1 | #DIV/0! | 1 | #DIV/0! |
| Htr5b 15564         | -1 | #DIV/0! | 1 | #DIV/0! |
| Vmn1r41 113857      | -1 | #DIV/0! | 1 | #DIV/0! |
| Gm4850 226957       | -1 | #DIV/0! | 1 | #DIV/0! |
| Vmn2r51 100042921   | -1 | #DIV/0! | 1 | #DIV/0! |
| Olfr1006 258563     | -1 | #DIV/0! | 1 | #DIV/0! |
| Vmn2r81 216144      | -1 | #DIV/0! | 1 | #DIV/0! |
| Ysk4 22625          | -1 | #DIV/0! | 1 | #DIV/0! |
| Lcn12 77701         | -1 | #DIV/0! | 1 | #DIV/0! |
| Gm5627 434510       | -1 | #DIV/0! | 1 | #DIV/0! |
| Olfr459 258569      | -1 | #DIV/0! | 1 | #DIV/0! |
| Foxg1 15228         | -1 | #DIV/0! | 1 | #DIV/0! |
| Gm5476 432985       | -1 | #DIV/0! | 1 | #DIV/0! |
| Pramef6 195555      | -1 | #DIV/0! | 1 | #DIV/0! |
| Defa5 13239         | -1 | #DIV/0! | 1 | #DIV/0! |
| Olfr635 259122      | -1 | #DIV/0! | 1 | #DIV/0! |
| Bai3 210933         | -1 | #DIV/0! | 1 | #DIV/0! |
| Mir362 723851       | -1 | #DIV/0! | 1 | #DIV/0! |
| 4930588N13Rik 75860 | -1 | #DIV/0! | 1 | #DIV/0! |
| Ccnb1ip1 239083     | -1 | #DIV/0! | 1 | #DIV/0! |
| Slco1a5 108096      | -1 | #DIV/0! | 1 | #DIV/0! |
| Olfr1087 258843     | -1 | #DIV/0! | 1 | #DIV/0! |
| Vsx1 114889         | -1 | #DIV/0! | 1 | #DIV/0! |
| Vmn1r173 545934     | -1 | #DIV/0! | 1 | #DIV/0! |
| Obox6 252830        | -1 | #DIV/0! | 1 | #DIV/0! |
| Olfr1302 258891     | -1 | #DIV/0! | 1 | #DIV/0! |
| Olfr1427 258674     | -1 | #DIV/0! | 1 | #DIV/0! |
| Defb42 619548       | -1 | #DIV/0! | 1 | #DIV/0! |
| Oog2 381570         | -1 | #DIV/0! | 1 | #DIV/0! |
| Hsd3b1 15492        | -1 | #DIV/0! | 1 | #DIV/0! |
| Prl3a1 67000        | -1 | #DIV/0! | 1 | #DIV/0! |
| Hist1h1b 56702      | -1 | #DIV/0! | 1 | #DIV/0! |
| Mir3100 100526504   | -1 | #DIV/0! | 1 | #DIV/0! |
| Fam71b 432552       | -1 | #DIV/0! | 1 | #DIV/0! |
| Rimbp3 239731       | -1 | #DIV/0! | 1 | #DIV/0! |
| Olfr1314 258442     | -1 | #DIV/0! | 1 | #DIV/0! |
| Slc5a12 241612      | -1 | #DIV/0! | 1 | #DIV/0! |
| 9430041J12Rik 77323 | -1 | #DIV/0! | 1 | #DIV/0! |
| Vmn2r93 627132      | -1 | #DIV/0! | 1 | #DIV/0! |
| Tbx22 245572        | -1 | #DIV/0! | 1 | #DIV/0! |
| Vmn1r100 100043536  | -1 | #DIV/0! | 1 | #DIV/0! |
| Susd5 382111        | -1 | #DIV/0! | 1 | #DIV/0! |
| Krtap24-1 239932    | -1 | #DIV/0! | 1 | #DIV/0! |
| Vwc2 319922         | -1 | #DIV/0! | 1 | #DIV/0! |
| Gm5082 328231       | -1 | #DIV/0! | 1 | #DIV/0! |
| Gm1045 381651       | -1 | #DIV/0! | 1 | #DIV/0! |
| Gm9047 668210       | -1 | #DIV/0! | 1 | #DIV/0! |

|                      |    |         |   |         |
|----------------------|----|---------|---|---------|
| Vmn1r237 171234      | -1 | #DIV/0! | 1 | #DIV/0! |
| Zfp36l3 333473       | -1 | #DIV/0! | 1 | #DIV/0! |
| BC117090 100038854   | -1 | #DIV/0! | 1 | #DIV/0! |
| Vmn1r20 434017       | -1 | #DIV/0! | 1 | #DIV/0! |
| Olfr1276 258390      | -1 | #DIV/0! | 1 | #DIV/0! |
| Olfr849 258520       | -1 | #DIV/0! | 1 | #DIV/0! |
| Cts8 56094           | -1 | #DIV/0! | 1 | #DIV/0! |
| Gm3646 100042065     | -1 | #DIV/0! | 1 | #DIV/0! |
| Mir29c 387224        | -1 | #DIV/0! | 1 | #DIV/0! |
| Wnt10b 22410         | -1 | #DIV/0! | 1 | #DIV/0! |
| Vmn2r32 22311        | -1 | #DIV/0! | 1 | #DIV/0! |
| Krt72-ps 105866      | -1 | #DIV/0! | 1 | #DIV/0! |
| Zfp804a 241514       | -1 | #DIV/0! | 1 | #DIV/0! |
| Serpinb2 18788       | -1 | #DIV/0! | 1 | #DIV/0! |
| Cntn4 269784         | -1 | #DIV/0! | 1 | #DIV/0! |
| Glod5 69824          | -1 | #DIV/0! | 1 | #DIV/0! |
| Defb34 360211        | -1 | #DIV/0! | 1 | #DIV/0! |
| Fam164b 75122        | -1 | #DIV/0! | 1 | #DIV/0! |
| Cysltr2 70086        | -1 | #DIV/0! | 1 | #DIV/0! |
| Gprin1 26913         | -1 | #DIV/0! | 1 | #DIV/0! |
| Olfr905 258800       | -1 | #DIV/0! | 1 | #DIV/0! |
| Gm5346 384813        | -1 | #DIV/0! | 1 | #DIV/0! |
| Dmrta1a 70887        | -1 | #DIV/0! | 1 | #DIV/0! |
| Nkx2-2as 100313531   | -1 | #DIV/0! | 1 | #DIV/0! |
| Olfr273 258821       | -1 | #DIV/0! | 1 | #DIV/0! |
| Snord33 27208        | -1 | #DIV/0! | 1 | #DIV/0! |
| Rex2 19715           | -1 | #DIV/0! | 1 | #DIV/0! |
| Bsph1 330470         | -1 | #DIV/0! | 1 | #DIV/0! |
| Fezf2 54713          | -1 | #DIV/0! | 1 | #DIV/0! |
| Ly6g6d 114654        | -1 | #DIV/0! | 1 | #DIV/0! |
| Hist1h4d 319156      | -1 | #DIV/0! | 1 | #DIV/0! |
| D4Ertd617e 100041290 | -1 | #DIV/0! | 1 | #DIV/0! |
| Clca6 99663          | -1 | #DIV/0! | 1 | #DIV/0! |
| Nkx2-3 18089         | -1 | #DIV/0! | 1 | #DIV/0! |
| Olfr213 258020       | -1 | #DIV/0! | 1 | #DIV/0! |
| Chn1 108699          | -1 | #DIV/0! | 1 | #DIV/0! |
| Ifna6 15969          | -1 | #DIV/0! | 1 | #DIV/0! |
| 4921530L21Rik 66732  | -1 | #DIV/0! | 1 | #DIV/0! |
| Matn3 17182          | -1 | #DIV/0! | 1 | #DIV/0! |
| Apobec4 71281        | -1 | #DIV/0! | 1 | #DIV/0! |
| Bpifb2 66557         | -1 | #DIV/0! | 1 | #DIV/0! |
| Gm15085 100039934    | -1 | #DIV/0! | 1 | #DIV/0! |
| Scgb1a1 22287        | -1 | #DIV/0! | 1 | #DIV/0! |
| Crabp2 12904         | -1 | #DIV/0! | 1 | #DIV/0! |
| Mir296 723906        | -1 | #DIV/0! | 1 | #DIV/0! |
| Tomm20 75266         | -1 | #DIV/0! | 1 | #DIV/0! |
| Dsg4 16769           | -1 | #DIV/0! | 1 | #DIV/0! |
| Clec3a 403395        | -1 | #DIV/0! | 1 | #DIV/0! |
| Psd2 74002           | -1 | #DIV/0! | 1 | #DIV/0! |
| Vmn2r63 435975       | -1 | #DIV/0! | 1 | #DIV/0! |
| Vmn1r48 113845       | -1 | #DIV/0! | 1 | #DIV/0! |
| Btnl5 81497          | -1 | #DIV/0! | 1 | #DIV/0! |
| Scrt1 170729         | -1 | #DIV/0! | 1 | #DIV/0! |

|                      |    |         |   |         |
|----------------------|----|---------|---|---------|
| Iltifb 116849        | -1 | #DIV/0! | 1 | #DIV/0! |
| Vmn1r57 665150       | -1 | #DIV/0! | 1 | #DIV/0! |
| Olfr862 258555       | -1 | #DIV/0! | 1 | #DIV/0! |
| Prl6a1 19111         | -1 | #DIV/0! | 1 | #DIV/0! |
| Tgm3 21818           | -1 | #DIV/0! | 1 | #DIV/0! |
| Nxf7 170722          | -1 | #DIV/0! | 1 | #DIV/0! |
| Syce1 668110         | -1 | #DIV/0! | 1 | #DIV/0! |
| Olfr45 18344         | -1 | #DIV/0! | 1 | #DIV/0! |
| 4933429019Rik 66770  | -1 | #DIV/0! | 1 | #DIV/0! |
| Ccr8 12776           | -1 | #DIV/0! | 1 | #DIV/0! |
| Klrc3 58179          | -1 | #DIV/0! | 1 | #DIV/0! |
| Ebf2 13592           | -1 | #DIV/0! | 1 | #DIV/0! |
| Ttc23l 75777         | -1 | #DIV/0! | 1 | #DIV/0! |
| Olfr655 258817       | -1 | #DIV/0! | 1 | #DIV/0! |
| Adamts16 271127      | -1 | #DIV/0! | 1 | #DIV/0! |
| Zscan18 232875       | -1 | #DIV/0! | 1 | #DIV/0! |
| Taar2 209512         | -1 | #DIV/0! | 1 | #DIV/0! |
| Gm4937 238829        | -1 | #DIV/0! | 1 | #DIV/0! |
| Olfr1336 258917      | -1 | #DIV/0! | 1 | #DIV/0! |
| 4930526D03Rik 277496 | -1 | #DIV/0! | 1 | #DIV/0! |
| Pate4 56872          | -1 | #DIV/0! | 1 | #DIV/0! |
| Mir496 751524        | -1 | #DIV/0! | 1 | #DIV/0! |
| Cdh9 12565           | -1 | #DIV/0! | 1 | #DIV/0! |
| Tmem151b 210573      | -1 | #DIV/0! | 1 | #DIV/0! |
| Olfr970 258604       | -1 | #DIV/0! | 1 | #DIV/0! |
| Olfr137 258481       | -1 | #DIV/0! | 1 | #DIV/0! |
| Vmn1r157 667551      | -1 | #DIV/0! | 1 | #DIV/0! |
| Gpr45 93690          | -1 | #DIV/0! | 1 | #DIV/0! |
| Olfr948 257912       | -1 | #DIV/0! | 1 | #DIV/0! |
| Foxl2os 768252       | -1 | #DIV/0! | 1 | #DIV/0! |
| Kcnk9 223604         | -1 | #DIV/0! | 1 | #DIV/0! |
| Vmn1r203 171270      | -1 | #DIV/0! | 1 | #DIV/0! |
| 4930428D18Rik 619294 | -1 | #DIV/0! | 1 | #DIV/0! |
| 5730416F02Rik 70550  | -1 | #DIV/0! | 1 | #DIV/0! |
| Zfp42 22702          | -1 | #DIV/0! | 1 | #DIV/0! |
| Ang3 11730           | -1 | #DIV/0! | 1 | #DIV/0! |
| Bpifa5 67135         | -1 | #DIV/0! | 1 | #DIV/0! |
| Efcab1 66793         | -1 | #DIV/0! | 1 | #DIV/0! |
| Gm13271 435791       | -1 | #DIV/0! | 1 | #DIV/0! |
| 1700020D05Rik 75555  | -1 | #DIV/0! | 1 | #DIV/0! |
| Gm6938 629024        | -1 | #DIV/0! | 1 | #DIV/0! |
| Tnni3k 435766        | -1 | #DIV/0! | 1 | #DIV/0! |
| Edn2 13615           | -1 | #DIV/0! | 1 | #DIV/0! |
| Olfr1 258923         | -1 | #DIV/0! | 1 | #DIV/0! |
| Gm10494 100038718    | -1 | #DIV/0! | 1 | #DIV/0! |
| Mir21 387140         | -1 | #DIV/0! | 1 | #DIV/0! |
| Cldn23 71908         | -1 | #DIV/0! | 1 | #DIV/0! |
| Olfr1341 258852      | -1 | #DIV/0! | 1 | #DIV/0! |
| Mir3074-1 100526474  | -1 | #DIV/0! | 1 | #DIV/0! |
| Defb11 246081        | -1 | #DIV/0! | 1 | #DIV/0! |
| Pcdhgb1 93699        | -1 | #DIV/0! | 1 | #DIV/0! |
| Olfr1109 258762      | -1 | #DIV/0! | 1 | #DIV/0! |
| Mir99a 387229        | -1 | #DIV/0! | 1 | #DIV/0! |



|                      |    |         |   |         |
|----------------------|----|---------|---|---------|
| Qrfpr 229214         | -1 | #DIV/0! | 1 | #DIV/0! |
| Olf96 258507         | -1 | #DIV/0! | 1 | #DIV/0! |
| Pcdhga3 93711        | -1 | #DIV/0! | 1 | #DIV/0! |
| Lipn 70166           | -1 | #DIV/0! | 1 | #DIV/0! |
| Vmn2r10 22307        | -1 | #DIV/0! | 1 | #DIV/0! |
| Gm10272 16697        | -1 | #DIV/0! | 1 | #DIV/0! |
| Tmem174 68344        | -1 | #DIV/0! | 1 | #DIV/0! |
| Snord64 100217429    | -1 | #DIV/0! | 1 | #DIV/0! |
| Olf1263 258790       | -1 | #DIV/0! | 1 | #DIV/0! |
| Vmn2r5 667060        | -1 | #DIV/0! | 1 | #DIV/0! |
| Tchhl1 71325         | -1 | #DIV/0! | 1 | #DIV/0! |
| Zfp936 668620        | -1 | #DIV/0! | 1 | #DIV/0! |
| 1810009J06Rik 73626  | -1 | #DIV/0! | 1 | #DIV/0! |
| Olf1299 258886       | -1 | #DIV/0! | 1 | #DIV/0! |
| Olf564 258356        | -1 | #DIV/0! | 1 | #DIV/0! |
| Mir376b 723934       | -1 | #DIV/0! | 1 | #DIV/0! |
| 4933402P03Rik 108803 | -1 | #DIV/0! | 1 | #DIV/0! |
| Mir697 735277        | -1 | #DIV/0! | 1 | #DIV/0! |
| Gm16897 320400       | -1 | #DIV/0! | 1 | #DIV/0! |
| Olf961 258497        | -1 | #DIV/0! | 1 | #DIV/0! |
| 1700025C18Rik 72211  | -1 | #DIV/0! | 1 | #DIV/0! |
| Hist1h3h 319152      | -1 | #DIV/0! | 1 | #DIV/0! |
| Olf1166 258644       | -1 | #DIV/0! | 1 | #DIV/0! |
| Gm4349 100043305     | -1 | #DIV/0! | 1 | #DIV/0! |
| Zfp819 74400         | -1 | #DIV/0! | 1 | #DIV/0! |
| Olf922 258777        | -1 | #DIV/0! | 1 | #DIV/0! |
| Snord35a 27211       | -1 | #DIV/0! | 1 | #DIV/0! |
| Vmn1r112 100043569   | -1 | #DIV/0! | 1 | #DIV/0! |
| Mir193 387188        | -1 | #DIV/0! | 1 | #DIV/0! |
| Olf164 258443        | -1 | #DIV/0! | 1 | #DIV/0! |
| Btln6 624681         | -1 | #DIV/0! | 1 | #DIV/0! |
| Olf418-ps1 258645    | -1 | #DIV/0! | 1 | #DIV/0! |
| Zan 22635            | -1 | #DIV/0! | 1 | #DIV/0! |
| Adam39 546055        | -1 | #DIV/0! | 1 | #DIV/0! |
| Klhl10 66720         | -1 | #DIV/0! | 1 | #DIV/0! |
| Siglec5 233186       | -1 | #DIV/0! | 1 | #DIV/0! |
| Olf312 258065        | -1 | #DIV/0! | 1 | #DIV/0! |
| Olf958 258327        | -1 | #DIV/0! | 1 | #DIV/0! |
| Olf473 258771        | -1 | #DIV/0! | 1 | #DIV/0! |
| Atp2a1 11937         | -1 | #DIV/0! | 1 | #DIV/0! |
| Rptn 20129           | -1 | #DIV/0! | 1 | #DIV/0! |
| 3110039M20Rik 67293  | -1 | #DIV/0! | 1 | #DIV/0! |
| Rxfp2 140498         | -1 | #DIV/0! | 1 | #DIV/0! |
| Crygb 12965          | -1 | #DIV/0! | 1 | #DIV/0! |
| Mir484 723916        | -1 | #DIV/0! | 1 | #DIV/0! |
| Rag1 19373           | -1 | #DIV/0! | 1 | #DIV/0! |
| Olf987 257951        | -1 | #DIV/0! | 1 | #DIV/0! |
| Mir680-1 735268      | -1 | #DIV/0! | 1 | #DIV/0! |
| Gm14374 434725       | -1 | #DIV/0! | 1 | #DIV/0! |
| Mir1956 100316706    | -1 | #DIV/0! | 1 | #DIV/0! |
| Olf771 258540        | -1 | #DIV/0! | 1 | #DIV/0! |
| Nptxr 73340          | -1 | #DIV/0! | 1 | #DIV/0! |
| Serpinb6c 97848      | -1 | #DIV/0! | 1 | #DIV/0! |

|                      |    |         |   |         |
|----------------------|----|---------|---|---------|
| Mboat2 67216         | -1 | #DIV/0! | 1 | #DIV/0! |
| Gm572 230909         | -1 | #DIV/0! | 1 | #DIV/0! |
| Fam75d3 72219        | -1 | #DIV/0! | 1 | #DIV/0! |
| Olf870 57251         | -1 | #DIV/0! | 1 | #DIV/0! |
| Olf725 258314        | -1 | #DIV/0! | 1 | #DIV/0! |
| Olf1158 258639       | -1 | #DIV/0! | 1 | #DIV/0! |
| BC061237 385138      | -1 | #DIV/0! | 1 | #DIV/0! |
| Foxi3 232077         | -1 | #DIV/0! | 1 | #DIV/0! |
| Crybb1 12960         | -1 | #DIV/0! | 1 | #DIV/0! |
| Mir547 723918        | -1 | #DIV/0! | 1 | #DIV/0! |
| Krtap4-2 68673       | -1 | #DIV/0! | 1 | #DIV/0! |
| Mir742 100049548     | -1 | #DIV/0! | 1 | #DIV/0! |
| Mir690 751543        | -1 | #DIV/0! | 1 | #DIV/0! |
| Olf434 258366        | -1 | #DIV/0! | 1 | #DIV/0! |
| Txndc8 67402         | -1 | #DIV/0! | 1 | #DIV/0! |
| Mtap9 213582         | -1 | #DIV/0! | 1 | #DIV/0! |
| Tmigd1 66601         | -1 | #DIV/0! | 1 | #DIV/0! |
| Gpr123 52389         | -1 | #DIV/0! | 1 | #DIV/0! |
| AU021034 219170      | -1 | #DIV/0! | 1 | #DIV/0! |
| Tmem30c 71027        | -1 | #DIV/0! | 1 | #DIV/0! |
| Gm10248 791307       | -1 | #DIV/0! | 1 | #DIV/0! |
| Npas4 225872         | -1 | #DIV/0! | 1 | #DIV/0! |
| Zkscan16 100041581   | -1 | #DIV/0! | 1 | #DIV/0! |
| Foxl1 14241          | -1 | #DIV/0! | 1 | #DIV/0! |
| Defb13 246083        | -1 | #DIV/0! | 1 | #DIV/0! |
| Olf130 258480        | -1 | #DIV/0! | 1 | #DIV/0! |
| Mc5r 17203           | -1 | #DIV/0! | 1 | #DIV/0! |
| H2-M10.2 333715      | -1 | #DIV/0! | 1 | #DIV/0! |
| Dlgap2 244310        | -1 | #DIV/0! | 1 | #DIV/0! |
| Mrgprg 381974        | -1 | #DIV/0! | 1 | #DIV/0! |
| Ceacam19 319930      | -1 | #DIV/0! | 1 | #DIV/0! |
| Mir217 387213        | -1 | #DIV/0! | 1 | #DIV/0! |
| Tubb2a-ps2 627110    | -1 | #DIV/0! | 1 | #DIV/0! |
| 2310046A06Rik 69642  | -1 | #DIV/0! | 1 | #DIV/0! |
| Arhgdig 14570        | -1 | #DIV/0! | 1 | #DIV/0! |
| Mylk2 228785         | -1 | #DIV/0! | 1 | #DIV/0! |
| Cypt2-ps 245566      | -1 | #DIV/0! | 1 | #DIV/0! |
| Fscb 623046          | -1 | #DIV/0! | 1 | #DIV/0! |
| Olf938 258430        | -1 | #DIV/0! | 1 | #DIV/0! |
| 1700001C02Rik 75434  | -1 | #DIV/0! | 1 | #DIV/0! |
| Defb15 246082        | -1 | #DIV/0! | 1 | #DIV/0! |
| Opr1 18389           | -1 | #DIV/0! | 1 | #DIV/0! |
| Olf71 56015          | -1 | #DIV/0! | 1 | #DIV/0! |
| LOC243676 243676     | -1 | #DIV/0! | 1 | #DIV/0! |
| Tff1 21784           | -1 | #DIV/0! | 1 | #DIV/0! |
| Cyp4f40 631304       | -1 | #DIV/0! | 1 | #DIV/0! |
| Gm13088 277668       | -1 | #DIV/0! | 1 | #DIV/0! |
| Olf984 258601        | -1 | #DIV/0! | 1 | #DIV/0! |
| Olf1323 258385       | -1 | #DIV/0! | 1 | #DIV/0! |
| Grik2 14806          | -1 | #DIV/0! | 1 | #DIV/0! |
| 5330439B14Rik 321015 | -1 | #DIV/0! | 1 | #DIV/0! |
| Hist1h3c 319148      | -1 | #DIV/0! | 1 | #DIV/0! |
| Spr3 20766           | -1 | #DIV/0! | 1 | #DIV/0! |

|                      |    |         |   |         |
|----------------------|----|---------|---|---------|
| Gm4297 100043216     | -1 | #DIV/0! | 1 | #DIV/0! |
| Mir1247 100526515    | -1 | #DIV/0! | 1 | #DIV/0! |
| Klrb1a 17057         | -1 | #DIV/0! | 1 | #DIV/0! |
| Mir194-2 723957      | -1 | #DIV/0! | 1 | #DIV/0! |
| A930003A15Rik 68162  | -1 | #DIV/0! | 1 | #DIV/0! |
| Zp4-ps 664793        | -1 | #DIV/0! | 1 | #DIV/0! |
| Olfr643 259081       | -1 | #DIV/0! | 1 | #DIV/0! |
| Vgll2 215031         | -1 | #DIV/0! | 1 | #DIV/0! |
| Myh13 544791         | -1 | #DIV/0! | 1 | #DIV/0! |
| D030018L15Rik 402773 | -1 | #DIV/0! | 1 | #DIV/0! |
| Olfr837 258558       | -1 | #DIV/0! | 1 | #DIV/0! |
| Gpr150 238725        | -1 | #DIV/0! | 1 | #DIV/0! |
| Gm4871 231885        | -1 | #DIV/0! | 1 | #DIV/0! |
| Olfr3 18328          | -1 | #DIV/0! | 1 | #DIV/0! |
| Vsx2 12677           | -1 | #DIV/0! | 1 | #DIV/0! |
| Mir669k 100316663    | -1 | #DIV/0! | 1 | #DIV/0! |
| Sh3gl3 20408         | -1 | #DIV/0! | 1 | #DIV/0! |
| 4930503E14Rik 74954  | -1 | #DIV/0! | 1 | #DIV/0! |
| Fam71e2 243822       | -1 | #DIV/0! | 1 | #DIV/0! |
| Hyal6 74409          | -1 | #DIV/0! | 1 | #DIV/0! |
| Olfr66 18367         | -1 | #DIV/0! | 1 | #DIV/0! |
| Slc6a1 232333        | -1 | #DIV/0! | 1 | #DIV/0! |
| 4930594C11Rik 77633  | -1 | #DIV/0! | 1 | #DIV/0! |
| Mir669a-2 735258     | -1 | #DIV/0! | 1 | #DIV/0! |
| Vmn2r27 232367       | -1 | #DIV/0! | 1 | #DIV/0! |
| Aqp6 11831           | -1 | #DIV/0! | 1 | #DIV/0! |
| Mir592 735266        | -1 | #DIV/0! | 1 | #DIV/0! |
| Elmod1 270162        | -1 | #DIV/0! | 1 | #DIV/0! |
| Gm16405 100040867    | -1 | #DIV/0! | 1 | #DIV/0! |
| Slc26a7 208890       | -1 | #DIV/0! | 1 | #DIV/0! |
| Fam124b 241128       | -1 | #DIV/0! | 1 | #DIV/0! |
| Tas2r131 387356      | -1 | #DIV/0! | 1 | #DIV/0! |
| 4933425L06Rik 66763  | -1 | #DIV/0! | 1 | #DIV/0! |
| Hoxc5 15424          | -1 | #DIV/0! | 1 | #DIV/0! |
| Gm833 330004         | -1 | #DIV/0! | 1 | #DIV/0! |
| Arnt2 11864          | -1 | #DIV/0! | 1 | #DIV/0! |
| 1700022I11Rik 67317  | -1 | #DIV/0! | 1 | #DIV/0! |
| Gm9159 668415        | -1 | #DIV/0! | 1 | #DIV/0! |
| Olfr1423 258675      | -1 | #DIV/0! | 1 | #DIV/0! |
| Slit3 20564          | -1 | #DIV/0! | 1 | #DIV/0! |
| Olfr458 258436       | -1 | #DIV/0! | 1 | #DIV/0! |
| Prdm8 77630          | -1 | #DIV/0! | 1 | #DIV/0! |
| 9230110F15Rik 77080  | -1 | #DIV/0! | 1 | #DIV/0! |
| Olfr503 259143       | -1 | #DIV/0! | 1 | #DIV/0! |
| 1110017D15Rik 73721  | -1 | #DIV/0! | 1 | #DIV/0! |
| Mir205 387201        | -1 | #DIV/0! | 1 | #DIV/0! |
| Snora69 104369       | -1 | #DIV/0! | 1 | #DIV/0! |
| Gm5538 433597        | -1 | #DIV/0! | 1 | #DIV/0! |
| A530098C11Rik 433294 | -1 | #DIV/0! | 1 | #DIV/0! |
| Mirlet7a-2 723965    | -1 | #DIV/0! | 1 | #DIV/0! |
| Etd 69501            | -1 | #DIV/0! | 1 | #DIV/0! |
| Mir883b 100124493    | -1 | #DIV/0! | 1 | #DIV/0! |
| Tex28 385380         | -1 | #DIV/0! | 1 | #DIV/0! |

|                      |    |         |   |         |
|----------------------|----|---------|---|---------|
| Olfr533 258056       | -1 | #DIV/0! | 1 | #DIV/0! |
| Gm3428 100041605     | -1 | #DIV/0! | 1 | #DIV/0! |
| Sec14I5 665119       | -1 | #DIV/0! | 1 | #DIV/0! |
| Adprhl1 234072       | -1 | #DIV/0! | 1 | #DIV/0! |
| Ppp1r36 210762       | -1 | #DIV/0! | 1 | #DIV/0! |
| 6030422M02Rik 240697 | -1 | #DIV/0! | 1 | #DIV/0! |
| 6720489N17Rik 211378 | -1 | #DIV/0! | 1 | #DIV/0! |
| Cldn16 114141        | -1 | #DIV/0! | 1 | #DIV/0! |
| Slc9a4 110895        | -1 | #DIV/0! | 1 | #DIV/0! |
| Unc5c 22253          | -1 | #DIV/0! | 1 | #DIV/0! |
| Tsnaxip1 72236       | -1 | #DIV/0! | 1 | #DIV/0! |
| 6430411K18Rik 76880  | -1 | #DIV/0! | 1 | #DIV/0! |
| 4930524B15Rik 67592  | -1 | #DIV/0! | 1 | #DIV/0! |
| Mir673 751547        | -1 | #DIV/0! | 1 | #DIV/0! |
| Gm12776 100043868    | -1 | #DIV/0! | 1 | #DIV/0! |
| Olfr1020 258573      | -1 | #DIV/0! | 1 | #DIV/0! |
| Mir147 387165        | -1 | #DIV/0! | 1 | #DIV/0! |
| 4930432K09Rik 73779  | -1 | #DIV/0! | 1 | #DIV/0! |
| Ereg 13874           | -1 | #DIV/0! | 1 | #DIV/0! |
| Olfr49 18348         | -1 | #DIV/0! | 1 | #DIV/0! |
| Cndp1 338403         | -1 | #DIV/0! | 1 | #DIV/0! |
| Klra10 16628         | -1 | #DIV/0! | 1 | #DIV/0! |
| Mir449b 100190765    | -1 | #DIV/0! | 1 | #DIV/0! |
| Vmn1r170 546944      | -1 | #DIV/0! | 1 | #DIV/0! |
| 4930474N05Rik 218921 | -1 | #DIV/0! | 1 | #DIV/0! |
| H60b 667281          | -1 | #DIV/0! | 1 | #DIV/0! |
| Gdf7 238057          | -1 | #DIV/0! | 1 | #DIV/0! |
| Olfr1275 257980      | -1 | #DIV/0! | 1 | #DIV/0! |
| Olfr522 258954       | -1 | #DIV/0! | 1 | #DIV/0! |
| Vmn1r195 171257      | -1 | #DIV/0! | 1 | #DIV/0! |
| Zp3 22788            | -1 | #DIV/0! | 1 | #DIV/0! |
| Otop2 237987         | -1 | #DIV/0! | 1 | #DIV/0! |
| Mir707 735269        | -1 | #DIV/0! | 1 | #DIV/0! |
| Tmem132d 243274      | -1 | #DIV/0! | 1 | #DIV/0! |
| Glpr1l1 69286        | -1 | #DIV/0! | 1 | #DIV/0! |
| Vmn1r169 100043103   | -1 | #DIV/0! | 1 | #DIV/0! |
| Olfr918 258372       | -1 | #DIV/0! | 1 | #DIV/0! |
| Lcn4 16821           | -1 | #DIV/0! | 1 | #DIV/0! |
| Cypt12 75439         | -1 | #DIV/0! | 1 | #DIV/0! |
| Gm17830 100415784    | -1 | #DIV/0! | 1 | #DIV/0! |
| Olfr69 18370         | -1 | #DIV/0! | 1 | #DIV/0! |
| Mir568 100124467     | -1 | #DIV/0! | 1 | #DIV/0! |
| Camp 12796           | -1 | #DIV/0! | 1 | #DIV/0! |
| Olfr815 258665       | -1 | #DIV/0! | 1 | #DIV/0! |
| Olfr535 258956       | -1 | #DIV/0! | 1 | #DIV/0! |
| 1700045I19Rik 74264  | -1 | #DIV/0! | 1 | #DIV/0! |
| Mrgpra2b 235712      | -1 | #DIV/0! | 1 | #DIV/0! |
| Slc6a11 243616       | -1 | #DIV/0! | 1 | #DIV/0! |
| Tmod2 50876          | -1 | #DIV/0! | 1 | #DIV/0! |
| Olfr73 117004        | -1 | #DIV/0! | 1 | #DIV/0! |
| Sox1 20664           | -1 | #DIV/0! | 1 | #DIV/0! |
| Olfr1161 258845      | -1 | #DIV/0! | 1 | #DIV/0! |
| Olfr954 258328       | -1 | #DIV/0! | 1 | #DIV/0! |

|                         |    |         |   |         |
|-------------------------|----|---------|---|---------|
| Gm10439 382243          | -1 | #DIV/0! | 1 | #DIV/0! |
| Serpinb3c 381286        | -1 | #DIV/0! | 1 | #DIV/0! |
| 4922502D21Rik 381816    | -1 | #DIV/0! | 1 | #DIV/0! |
| Trpv6 64177             | -1 | #DIV/0! | 1 | #DIV/0! |
| Gpr22 73010             | -1 | #DIV/0! | 1 | #DIV/0! |
| Serpinb9g 93806         | -1 | #DIV/0! | 1 | #DIV/0! |
| Vmn1r117 667262         | -1 | #DIV/0! | 1 | #DIV/0! |
| Pou4f3 18998            | -1 | #DIV/0! | 1 | #DIV/0! |
| Olfr727 258316          | -1 | #DIV/0! | 1 | #DIV/0! |
| Bc1-ps1 12031           | -1 | #DIV/0! | 1 | #DIV/0! |
| Lrrc10 237560           | -1 | #DIV/0! | 1 | #DIV/0! |
| Gm12888 545677          | -1 | #DIV/0! | 1 | #DIV/0! |
| Gm7271 639545           | -1 | #DIV/0! | 1 | #DIV/0! |
| Olfr512 258719          | -1 | #DIV/0! | 1 | #DIV/0! |
| 1700028P14Rik 67483     | -1 | #DIV/0! | 1 | #DIV/0! |
| Dlx6as2 13397           | -1 | #DIV/0! | 1 | #DIV/0! |
| Shcbp1 20419            | -1 | #DIV/0! | 1 | #DIV/0! |
| Olfr1411 258483         | -1 | #DIV/0! | 1 | #DIV/0! |
| Galnt5 241391           | -1 | #DIV/0! | 1 | #DIV/0! |
| Odf4 252868             | -1 | #DIV/0! | 1 | #DIV/0! |
| Vmn1r234 171232         | -1 | #DIV/0! | 1 | #DIV/0! |
| Olfr175-ps1 259004      | -1 | #DIV/0! | 1 | #DIV/0! |
| E330021D16Rik 100502936 | -1 | #DIV/0! | 1 | #DIV/0! |
| Krt13 16663             | -1 | #DIV/0! | 1 | #DIV/0! |
| Olfr597 258135          | -1 | #DIV/0! | 1 | #DIV/0! |
| Vax2os1 574519          | -1 | #DIV/0! | 1 | #DIV/0! |
| Vmn1r197 171278         | -1 | #DIV/0! | 1 | #DIV/0! |
| Stmn3 20262             | -1 | #DIV/0! | 1 | #DIV/0! |
| Ifna11 15964            | -1 | #DIV/0! | 1 | #DIV/0! |
| F2rl3 14065             | -1 | #DIV/0! | 1 | #DIV/0! |
| Abpg 110187             | -1 | #DIV/0! | 1 | #DIV/0! |
| Plb1 665270             | -1 | #DIV/0! | 1 | #DIV/0! |
| Mir1896 100316752       | -1 | #DIV/0! | 1 | #DIV/0! |
| Mir32 723837            | -1 | #DIV/0! | 1 | #DIV/0! |
| Gm15091 382244          | -1 | #DIV/0! | 1 | #DIV/0! |
| Olfr1122 259033         | -1 | #DIV/0! | 1 | #DIV/0! |
| Olfr1012 258561         | -1 | #DIV/0! | 1 | #DIV/0! |
| Pvalb 19293             | -1 | #DIV/0! | 1 | #DIV/0! |
| Mir3081 100526478       | -1 | #DIV/0! | 1 | #DIV/0! |
| Alx4 11695              | -1 | #DIV/0! | 1 | #DIV/0! |
| Ms4a15 545279           | -1 | #DIV/0! | 1 | #DIV/0! |
| Olfr381 259024          | -1 | #DIV/0! | 1 | #DIV/0! |
| Col17a1 12821           | -1 | #DIV/0! | 1 | #DIV/0! |
| Zar1 317755             | -1 | #DIV/0! | 1 | #DIV/0! |
| Gm2012 100039030        | -1 | #DIV/0! | 1 | #DIV/0! |
| 1700001L19Rik 69315     | -1 | #DIV/0! | 1 | #DIV/0! |
| Gm12830 433746          | -1 | #DIV/0! | 1 | #DIV/0! |
| Tmed11 67366            | -1 | #DIV/0! | 1 | #DIV/0! |
| Olfr808 258930          | -1 | #DIV/0! | 1 | #DIV/0! |
| Mir767 100316827        | -1 | #DIV/0! | 1 | #DIV/0! |
| Vstm2a 211739           | -1 | #DIV/0! | 1 | #DIV/0! |
| 4930433I11Rik 243944    | -1 | #DIV/0! | 1 | #DIV/0! |
| Rprl2 19784             | -1 | #DIV/0! | 1 | #DIV/0! |

|                     |    |         |   |         |
|---------------------|----|---------|---|---------|
| Cdh19 227485        | -1 | #DIV/0! | 1 | #DIV/0! |
| Gm5128 331529       | -1 | #DIV/0! | 1 | #DIV/0! |
| Gm14920 100039319   | -1 | #DIV/0! | 1 | #DIV/0! |
| Fam5c 215378        | -1 | #DIV/0! | 1 | #DIV/0! |
| Gm266 212539        | -1 | #DIV/0! | 1 | #DIV/0! |
| Fpr-rs6 321020      | -1 | #DIV/0! | 1 | #DIV/0! |
| Olfr212 258019      | -1 | #DIV/0! | 1 | #DIV/0! |
| 4930550L24Rik 75352 | -1 | #DIV/0! | 1 | #DIV/0! |
| Dlx6 13396          | -1 | #DIV/0! | 1 | #DIV/0! |
| Ms4a10 69826        | -1 | #DIV/0! | 1 | #DIV/0! |
| Mir203 387199       | -1 | #DIV/0! | 1 | #DIV/0! |
| Gm14725 628053      | -1 | #DIV/0! | 1 | #DIV/0! |
| Dok5 76829          | -1 | #DIV/0! | 1 | #DIV/0! |
| Mir1912 100526529   | -1 | #DIV/0! | 1 | #DIV/0! |
| Fhl5 57756          | -1 | #DIV/0! | 1 | #DIV/0! |
| Olfr1048 259016     | -1 | #DIV/0! | 1 | #DIV/0! |
| Mir3095 100526502   | -1 | #DIV/0! | 1 | #DIV/0! |
| Vmn1r54 113851      | -1 | #DIV/0! | 1 | #DIV/0! |
| Wnt8b 22423         | -1 | #DIV/0! | 1 | #DIV/0! |
| Cntnap5b 241175     | -1 | #DIV/0! | 1 | #DIV/0! |
| Kank4 242553        | -1 | #DIV/0! | 1 | #DIV/0! |
| Olfr472 258770      | -1 | #DIV/0! | 1 | #DIV/0! |
| Rfpl3s 75258        | -1 | #DIV/0! | 1 | #DIV/0! |
| 1700023A16Rik 69371 | -1 | #DIV/0! | 1 | #DIV/0! |
| Vmn1r68 628580      | -1 | #DIV/0! | 1 | #DIV/0! |
| Olfr169 258158      | -1 | #DIV/0! | 1 | #DIV/0! |
| Krtap22-2 68740     | -1 | #DIV/0! | 1 | #DIV/0! |
| Hs6st3 50787        | -1 | #DIV/0! | 1 | #DIV/0! |
| Cfc1 12627          | -1 | #DIV/0! | 1 | #DIV/0! |
| Olfr488 258727      | -1 | #DIV/0! | 1 | #DIV/0! |
| Olfr1437 258117     | -1 | #DIV/0! | 1 | #DIV/0! |
| Rgs22 626596        | -1 | #DIV/0! | 1 | #DIV/0! |
| Cacna1b 12287       | -1 | #DIV/0! | 1 | #DIV/0! |
| Olfr97 258505       | -1 | #DIV/0! | 1 | #DIV/0! |
| Stac 20840          | -1 | #DIV/0! | 1 | #DIV/0! |
| Mir202 387198       | -1 | #DIV/0! | 1 | #DIV/0! |
| Emx2os 329078       | -1 | #DIV/0! | 1 | #DIV/0! |
| Vmn2r112 628185     | -1 | #DIV/0! | 1 | #DIV/0! |
| Tmem210 78217       | -1 | #DIV/0! | 1 | #DIV/0! |
| Olfr1205 258898     | -1 | #DIV/0! | 1 | #DIV/0! |
| Adamts20 223838     | -1 | #DIV/0! | 1 | #DIV/0! |
| Sln 66402           | -1 | #DIV/0! | 1 | #DIV/0! |
| Katnal2 71206       | -1 | #DIV/0! | 1 | #DIV/0! |
| Klk1b16 16615       | -1 | #DIV/0! | 1 | #DIV/0! |
| Gm5415 408191       | -1 | #DIV/0! | 1 | #DIV/0! |
| Mafa 378435         | -1 | #DIV/0! | 1 | #DIV/0! |
| Gm14151 433486      | -1 | #DIV/0! | 1 | #DIV/0! |
| Tas2r139 353148     | -1 | #DIV/0! | 1 | #DIV/0! |
| Wfdc8 277343        | -1 | #DIV/0! | 1 | #DIV/0! |
| Mir432 100316735    | -1 | #DIV/0! | 1 | #DIV/0! |
| Dazl 13164          | -1 | #DIV/0! | 1 | #DIV/0! |
| Gm6880 628456       | -1 | #DIV/0! | 1 | #DIV/0! |
| Asb9 69299          | -1 | #DIV/0! | 1 | #DIV/0! |

|                         |    |         |   |         |
|-------------------------|----|---------|---|---------|
| Sva 20939               | -1 | #DIV/0! | 1 | #DIV/0! |
| Olfr1131 258652         | -1 | #DIV/0! | 1 | #DIV/0! |
| Olfr153 110511          | -1 | #DIV/0! | 1 | #DIV/0! |
| Rhox2e 100040016        | -1 | #DIV/0! | 1 | #DIV/0! |
| E330012B07Rik 100039641 | -1 | #DIV/0! | 1 | #DIV/0! |
| Lpar3 65086             | -1 | #DIV/0! | 1 | #DIV/0! |
| 9430031J16Rik 241134    | -1 | #DIV/0! | 1 | #DIV/0! |
| Fbxw19 235612           | -1 | #DIV/0! | 1 | #DIV/0! |
| Spdyb 74673             | -1 | #DIV/0! | 1 | #DIV/0! |
| Dnaic2 432611           | -1 | #DIV/0! | 1 | #DIV/0! |
| Hctr2 387285            | -1 | #DIV/0! | 1 | #DIV/0! |
| Olfr1031 257916         | -1 | #DIV/0! | 1 | #DIV/0! |
| Gm13011 242711          | -1 | #DIV/0! | 1 | #DIV/0! |
| Mir615 751557           | -1 | #DIV/0! | 1 | #DIV/0! |
| Olfr688 259161          | -1 | #DIV/0! | 1 | #DIV/0! |
| Olfr279 258502          | -1 | #DIV/0! | 1 | #DIV/0! |
| Vmn1r77 628946          | -1 | #DIV/0! | 1 | #DIV/0! |
| Calcoco2 76815          | -1 | #DIV/0! | 1 | #DIV/0! |
| Olfr24 18322            | -1 | #DIV/0! | 1 | #DIV/0! |
| Olfr106-ps 257925       | -1 | #DIV/0! | 1 | #DIV/0! |
| Pcdhgc5 93708           | -1 | #DIV/0! | 1 | #DIV/0! |
| Mir3060 100526466       | -1 | #DIV/0! | 1 | #DIV/0! |
| Vmn1r121 667240         | -1 | #DIV/0! | 1 | #DIV/0! |
| Olfr1351 259042         | -1 | #DIV/0! | 1 | #DIV/0! |
| Nefm 18040              | -1 | #DIV/0! | 1 | #DIV/0! |
| Pnliprp1 18946          | -1 | #DIV/0! | 1 | #DIV/0! |
| Tacr2 21337             | -1 | #DIV/0! | 1 | #DIV/0! |
| Gm7337 654494           | -1 | #DIV/0! | 1 | #DIV/0! |
| Al593442 330941         | -1 | #DIV/0! | 1 | #DIV/0! |
| Svs3a 64335             | -1 | #DIV/0! | 1 | #DIV/0! |
| Otogl 628870            | -1 | #DIV/0! | 1 | #DIV/0! |
| 4833423E24Rik 228151    | -1 | #DIV/0! | 1 | #DIV/0! |
| Cyp24a1 13081           | -1 | #DIV/0! | 1 | #DIV/0! |
| Hdgfl1 15192            | -1 | #DIV/0! | 1 | #DIV/0! |
| Snord1b 100216531       | -1 | #DIV/0! | 1 | #DIV/0! |
| Mir218-1 723822         | -1 | #DIV/0! | 1 | #DIV/0! |
| Dsc1 13505              | -1 | #DIV/0! | 1 | #DIV/0! |
| Vmn2r102 224572         | -1 | #DIV/0! | 1 | #DIV/0! |
| Gm14743 236874          | -1 | #DIV/0! | 1 | #DIV/0! |
| Tcl1b1 27379            | -1 | #DIV/0! | 1 | #DIV/0! |
| Olfr417 258238          | -1 | #DIV/0! | 1 | #DIV/0! |
| Magea4 17140            | -1 | #DIV/0! | 1 | #DIV/0! |
| Car12 76459             | -1 | #DIV/0! | 1 | #DIV/0! |
| Gm5 194292              | -1 | #DIV/0! | 1 | #DIV/0! |
| Fgf20 80857             | -1 | #DIV/0! | 1 | #DIV/0! |
| Gm6890 628518           | -1 | #DIV/0! | 1 | #DIV/0! |
| Olfr1330 258331         | -1 | #DIV/0! | 1 | #DIV/0! |
| Vmn1r9 171203           | -1 | #DIV/0! | 1 | #DIV/0! |
| Rasgrf1 19417           | -1 | #DIV/0! | 1 | #DIV/0! |
| Olfr1154 258641         | -1 | #DIV/0! | 1 | #DIV/0! |
| 4930428E23Rik 434800    | -1 | #DIV/0! | 1 | #DIV/0! |
| Slc26a3 13487           | -1 | #DIV/0! | 1 | #DIV/0! |
| Olfr1000 257899         | -1 | #DIV/0! | 1 | #DIV/0! |

|                         |    |         |   |         |
|-------------------------|----|---------|---|---------|
| Fam159a 545667          | -1 | #DIV/0! | 1 | #DIV/0! |
| Mir130b 723816          | -1 | #DIV/0! | 1 | #DIV/0! |
| Igfl3 232925            | -1 | #DIV/0! | 1 | #DIV/0! |
| Tph2 216343             | -1 | #DIV/0! | 1 | #DIV/0! |
| Il1f6 54448             | -1 | #DIV/0! | 1 | #DIV/0! |
| Mir804 100049547        | -1 | #DIV/0! | 1 | #DIV/0! |
| Gm14139 100271882       | -1 | #DIV/0! | 1 | #DIV/0! |
| Mir381 723935           | -1 | #DIV/0! | 1 | #DIV/0! |
| Defb44-ps 654454        | -1 | #DIV/0! | 1 | #DIV/0! |
| Ifnz 319146             | -1 | #DIV/0! | 1 | #DIV/0! |
| Vmn1r36 171184          | -1 | #DIV/0! | 1 | #DIV/0! |
| Inpp4b 234515           | -1 | #DIV/0! | 1 | #DIV/0! |
| Vmn2r22 546913          | -1 | #DIV/0! | 1 | #DIV/0! |
| Tpsg1 26945             | -1 | #DIV/0! | 1 | #DIV/0! |
| 3425401B19Rik 100504518 | -1 | #DIV/0! | 1 | #DIV/0! |
| Mir2861 100499514       | -1 | #DIV/0! | 1 | #DIV/0! |
| Vmn2r88 669149          | -1 | #DIV/0! | 1 | #DIV/0! |
| Dbx1 13172              | -1 | #DIV/0! | 1 | #DIV/0! |
| Vmn2r94 665227          | -1 | #DIV/0! | 1 | #DIV/0! |
| Mir1934 100316840       | -1 | #DIV/0! | 1 | #DIV/0! |
| Gata1 14460             | -1 | #DIV/0! | 1 | #DIV/0! |
| Olfr1066 257880         | -1 | #DIV/0! | 1 | #DIV/0! |
| Vmn2r118 383258         | -1 | #DIV/0! | 1 | #DIV/0! |
| Prlhr 226278            | -1 | #DIV/0! | 1 | #DIV/0! |
| Abpb 233099             | -1 | #DIV/0! | 1 | #DIV/0! |
| 4930512B01Rik 74724     | -1 | #DIV/0! | 1 | #DIV/0! |
| Olfr1151 258631         | -1 | #DIV/0! | 1 | #DIV/0! |
| Armc4 74934             | -1 | #DIV/0! | 1 | #DIV/0! |
| H2-M9 14997             | -1 | #DIV/0! | 1 | #DIV/0! |
| Mir1a-1 387136          | -1 | #DIV/0! | 1 | #DIV/0! |
| Olfr209 404311          | -1 | #DIV/0! | 1 | #DIV/0! |
| Ear10 93725             | -1 | #DIV/0! | 1 | #DIV/0! |
| Prdm13 230025           | -1 | #DIV/0! | 1 | #DIV/0! |
| D330045A20Rik 102871    | -1 | #DIV/0! | 1 | #DIV/0! |
| Tspan6 56496            | -1 | #DIV/0! | 1 | #DIV/0! |
| Ptgdr 19214             | -1 | #DIV/0! | 1 | #DIV/0! |
| Tex13a 67944            | -1 | #DIV/0! | 1 | #DIV/0! |
| Scn1a 20265             | -1 | #DIV/0! | 1 | #DIV/0! |
| Col28a1 213945          | -1 | #DIV/0! | 1 | #DIV/0! |
| Ccdc11 74453            | -1 | #DIV/0! | 1 | #DIV/0! |
| Gm14548 100038909       | -1 | #DIV/0! | 1 | #DIV/0! |
| Zp1 22786               | -1 | #DIV/0! | 1 | #DIV/0! |
| Gng13 64337             | -1 | #DIV/0! | 1 | #DIV/0! |
| Gm5592 434172           | -1 | #DIV/0! | 1 | #DIV/0! |
| Spock3 72902            | -1 | #DIV/0! | 1 | #DIV/0! |
| AY512915 414067         | -1 | #DIV/0! | 1 | #DIV/0! |
| Olfr1308 258258         | -1 | #DIV/0! | 1 | #DIV/0! |
| Rnf148 71300            | -1 | #DIV/0! | 1 | #DIV/0! |
| 1700110M21Rik 76627     | -1 | #DIV/0! | 1 | #DIV/0! |
| Shisa7 232813           | -1 | #DIV/0! | 1 | #DIV/0! |
| Sox8 20681              | -1 | #DIV/0! | 1 | #DIV/0! |
| Svs1 243377             | -1 | #DIV/0! | 1 | #DIV/0! |
| Tpo 22018               | -1 | #DIV/0! | 1 | #DIV/0! |



|                      |    |         |   |         |
|----------------------|----|---------|---|---------|
| Syt10 54526          | -1 | #DIV/0! | 1 | #DIV/0! |
| Pcdhac1 353236       | -1 | #DIV/0! | 1 | #DIV/0! |
| Mir365-2 723853      | -1 | #DIV/0! | 1 | #DIV/0! |
| Nt5c1a 230718        | -1 | #DIV/0! | 1 | #DIV/0! |
| Dlx1 13390           | -1 | #DIV/0! | 1 | #DIV/0! |
| Clec12b 71183        | -1 | #DIV/0! | 1 | #DIV/0! |
| Vmn1r215 171253      | -1 | #DIV/0! | 1 | #DIV/0! |
| Timp1 21857          | -1 | #DIV/0! | 1 | #DIV/0! |
| Kcnmb4 58802         | -1 | #DIV/0! | 1 | #DIV/0! |
| Ccdc27 381580        | -1 | #DIV/0! | 1 | #DIV/0! |
| 4933400C05Rik 328019 | -1 | #DIV/0! | 1 | #DIV/0! |
| Il22 50929           | -1 | #DIV/0! | 1 | #DIV/0! |
| Kcne1 66240          | -1 | #DIV/0! | 1 | #DIV/0! |
| Nlrp4a 243880        | -1 | #DIV/0! | 1 | #DIV/0! |
| Slc17a6 140919       | -1 | #DIV/0! | 1 | #DIV/0! |
| Mir134 387152        | -1 | #DIV/0! | 1 | #DIV/0! |
| Olfr809 258321       | -1 | #DIV/0! | 1 | #DIV/0! |
| Olfr659 259052       | -1 | #DIV/0! | 1 | #DIV/0! |
| Mei1 74369           | -1 | #DIV/0! | 1 | #DIV/0! |
| Mir297a-3 100124482  | -1 | #DIV/0! | 1 | #DIV/0! |
| Kir3dl1 245616       | -1 | #DIV/0! | 1 | #DIV/0! |
| 4930558C23Rik 67654  | -1 | #DIV/0! | 1 | #DIV/0! |
| 4932411N23Rik 237029 | -1 | #DIV/0! | 1 | #DIV/0! |
| 1700026D08Rik 75556  | -1 | #DIV/0! | 1 | #DIV/0! |
| 1700042G07Rik 67323  | -1 | #DIV/0! | 1 | #DIV/0! |
| Elfn2 207393         | -1 | #DIV/0! | 1 | #DIV/0! |
| Olfr370 258267       | -1 | #DIV/0! | 1 | #DIV/0! |
| Olfr821 258772       | -1 | #DIV/0! | 1 | #DIV/0! |
| V1rd18 404288        | -1 | #DIV/0! | 1 | #DIV/0! |
| Olfr914 258782       | -1 | #DIV/0! | 1 | #DIV/0! |
| Defa24 503491        | -1 | #DIV/0! | 1 | #DIV/0! |
| Olfr1215 258451      | -1 | #DIV/0! | 1 | #DIV/0! |
| Mir133b 723817       | -1 | #DIV/0! | 1 | #DIV/0! |
| Gm5126 331480        | -1 | #DIV/0! | 1 | #DIV/0! |
| Cdsn 386463          | -1 | #DIV/0! | 1 | #DIV/0! |
| Cxcl3 330122         | -1 | #DIV/0! | 1 | #DIV/0! |
| Vmn2r76 675969       | -1 | #DIV/0! | 1 | #DIV/0! |
| Gm136 214568         | -1 | #DIV/0! | 1 | #DIV/0! |
| Olfr1188 258921      | -1 | #DIV/0! | 1 | #DIV/0! |
| Olfr1009 258565      | -1 | #DIV/0! | 1 | #DIV/0! |
| Ccdc116 76872        | -1 | #DIV/0! | 1 | #DIV/0! |
| Olfr139 259005       | -1 | #DIV/0! | 1 | #DIV/0! |
| Myog 17928           | -1 | #DIV/0! | 1 | #DIV/0! |
| Ccdc154 207209       | -1 | #DIV/0! | 1 | #DIV/0! |
| Musk 18198           | -1 | #DIV/0! | 1 | #DIV/0! |
| Slc46a2 30936        | -1 | #DIV/0! | 1 | #DIV/0! |
| Gm10280 791378       | -1 | #DIV/0! | 1 | #DIV/0! |
| Pou4f2 18997         | -1 | #DIV/0! | 1 | #DIV/0! |
| Zc3h12b 547176       | -1 | #DIV/0! | 1 | #DIV/0! |
| Vmn1r104 667135      | -1 | #DIV/0! | 1 | #DIV/0! |
| 5033404E19Rik 114668 | -1 | #DIV/0! | 1 | #DIV/0! |
| Olfr641 259075       | -1 | #DIV/0! | 1 | #DIV/0! |
| Krtap16-5 77918      | -1 | #DIV/0! | 1 | #DIV/0! |

|                     |    |         |   |         |
|---------------------|----|---------|---|---------|
| Psg-ps1 232919      | -1 | #DIV/0! | 1 | #DIV/0! |
| 4930515G16Rik 75070 | -1 | #DIV/0! | 1 | #DIV/0! |
| Olfr1461 258299     | -1 | #DIV/0! | 1 | #DIV/0! |
| Wap 22373           | -1 | #DIV/0! | 1 | #DIV/0! |
| Zfp300 245368       | -1 | #DIV/0! | 1 | #DIV/0! |
| Tulp1 22157         | -1 | #DIV/0! | 1 | #DIV/0! |
| Hhla1 654498        | -1 | #DIV/0! | 1 | #DIV/0! |
| Tkt1 83553          | -1 | #DIV/0! | 1 | #DIV/0! |
| Olfr889 258475      | -1 | #DIV/0! | 1 | #DIV/0! |
| Tssk3 58864         | -1 | #DIV/0! | 1 | #DIV/0! |
| Taar7d 435206       | -1 | #DIV/0! | 1 | #DIV/0! |
| Tas2r136 353165     | -1 | #DIV/0! | 1 | #DIV/0! |
| Olfr613 259104      | -1 | #DIV/0! | 1 | #DIV/0! |
| Krtap4-1 665891     | -1 | #DIV/0! | 1 | #DIV/0! |
| Dapl1 76747         | -1 | #DIV/0! | 1 | #DIV/0! |
| Psg26 574429        | -1 | #DIV/0! | 1 | #DIV/0! |
| Plag1 56711         | -1 | #DIV/0! | 1 | #DIV/0! |
| Fam170a 225497      | -1 | #DIV/0! | 1 | #DIV/0! |
| Snora7a 100217451   | -1 | #DIV/0! | 1 | #DIV/0! |
| Snord116 64243      | -1 | #DIV/0! | 1 | #DIV/0! |
| Mrgprb4 233230      | -1 | #DIV/0! | 1 | #DIV/0! |
| Triml2 622117       | -1 | #DIV/0! | 1 | #DIV/0! |
| Snord47 100217446   | -1 | #DIV/0! | 1 | #DIV/0! |
| Ptprh 545902        | -1 | #DIV/0! | 1 | #DIV/0! |
| Tepp 73407          | -1 | #DIV/0! | 1 | #DIV/0! |
| Olfr749 56858       | -1 | #DIV/0! | 1 | #DIV/0! |
| Ccdc18 73254        | -1 | #DIV/0! | 1 | #DIV/0! |
| Fgf3 14174          | -1 | #DIV/0! | 1 | #DIV/0! |
| Olfr1412 258274     | -1 | #DIV/0! | 1 | #DIV/0! |
| Mir1b 100316783     | -1 | #DIV/0! | 1 | #DIV/0! |
| Gm5347 384814       | -1 | #DIV/0! | 1 | #DIV/0! |
| 2810433D01Rik 77132 | -1 | #DIV/0! | 1 | #DIV/0! |
| Olfr1290 257662     | -1 | #DIV/0! | 1 | #DIV/0! |
| Snord65 100217444   | -1 | #DIV/0! | 1 | #DIV/0! |
| Klra13-ps 16631     | -1 | #DIV/0! | 1 | #DIV/0! |
| Mir683-1 751559     | -1 | #DIV/0! | 1 | #DIV/0! |
| 1500015O10Rik 78896 | -1 | #DIV/0! | 1 | #DIV/0! |
| 1700031M16Rik 73302 | -1 | #DIV/0! | 1 | #DIV/0! |
| Mak 17152           | -1 | #DIV/0! | 1 | #DIV/0! |
| Vmn1r11 113860      | -1 | #DIV/0! | 1 | #DIV/0! |
| Snora61 100217440   | -1 | #DIV/0! | 1 | #DIV/0! |
| Nr2e1 21907         | -1 | #DIV/0! | 1 | #DIV/0! |
| Ccl26 541307        | -1 | #DIV/0! | 1 | #DIV/0! |
| Neurod2 18013       | -1 | #DIV/0! | 1 | #DIV/0! |
| Prl3d1 18775        | -1 | #DIV/0! | 1 | #DIV/0! |
| Tecr1 243078        | -1 | #DIV/0! | 1 | #DIV/0! |
| Adamts19 240322     | -1 | #DIV/0! | 1 | #DIV/0! |
| Kcnh8 211468        | -1 | #DIV/0! | 1 | #DIV/0! |
| 1700034J05Rik 73344 | -1 | #DIV/0! | 1 | #DIV/0! |
| Gm15881 100271928   | -1 | #DIV/0! | 1 | #DIV/0! |
| Olfr295 258850      | -1 | #DIV/0! | 1 | #DIV/0! |
| Styk1 243659        | -1 | #DIV/0! | 1 | #DIV/0! |
| Mir706 735290       | -1 | #DIV/0! | 1 | #DIV/0! |

|                      |    |         |   |         |
|----------------------|----|---------|---|---------|
| Lce3b 66344          | -1 | #DIV/0! | 1 | #DIV/0! |
| Gzmd 14941           | -1 | #DIV/0! | 1 | #DIV/0! |
| Klra17 170733        | -1 | #DIV/0! | 1 | #DIV/0! |
| 4930579C15Rik 67753  | -1 | #DIV/0! | 1 | #DIV/0! |
| Tmco2 69469          | -1 | #DIV/0! | 1 | #DIV/0! |
| Crygs 12970          | -1 | #DIV/0! | 1 | #DIV/0! |
| Vmn1r22 171196       | -1 | #DIV/0! | 1 | #DIV/0! |
| Olfr1105 258085      | -1 | #DIV/0! | 1 | #DIV/0! |
| Fam187a 66784        | -1 | #DIV/0! | 1 | #DIV/0! |
| Tdpoz1 207213        | -1 | #DIV/0! | 1 | #DIV/0! |
| Olfr1143 258290      | -1 | #DIV/0! | 1 | #DIV/0! |
| Olfr1056 259020      | -1 | #DIV/0! | 1 | #DIV/0! |
| Olfr694 258444       | -1 | #DIV/0! | 1 | #DIV/0! |
| Olfr1513 258008      | -1 | #DIV/0! | 1 | #DIV/0! |
| Cel 12613            | -1 | #DIV/0! | 1 | #DIV/0! |
| Vash2 226841         | -1 | #DIV/0! | 1 | #DIV/0! |
| Snord42a 100529076   | -1 | #DIV/0! | 1 | #DIV/0! |
| G6pc2 14378          | -1 | #DIV/0! | 1 | #DIV/0! |
| Sycp1 20957          | -1 | #DIV/0! | 1 | #DIV/0! |
| Krtap16-3 71369      | -1 | #DIV/0! | 1 | #DIV/0! |
| Gm5771 436523        | -1 | #DIV/0! | 1 | #DIV/0! |
| Mir1945 100316833    | -1 | #DIV/0! | 1 | #DIV/0! |
| Mirlet7b 387245      | -1 | #DIV/0! | 1 | #DIV/0! |
| Olfr18 18315         | -1 | #DIV/0! | 1 | #DIV/0! |
| Olfr1507 57269       | -1 | #DIV/0! | 1 | #DIV/0! |
| Olfr311 258530       | -1 | #DIV/0! | 1 | #DIV/0! |
| 4930555G01Rik 108978 | -1 | #DIV/0! | 1 | #DIV/0! |
| Svs6 20945           | -1 | #DIV/0! | 1 | #DIV/0! |
| Trhde 237553         | -1 | #DIV/0! | 1 | #DIV/0! |
| Duox1 99439          | -1 | #DIV/0! | 1 | #DIV/0! |
| Olfr504 258163       | -1 | #DIV/0! | 1 | #DIV/0! |
| Vmn1r219 171272      | -1 | #DIV/0! | 1 | #DIV/0! |
| 6330527006Rik 76161  | -1 | #DIV/0! | 1 | #DIV/0! |
| Zfp711 245595        | -1 | #DIV/0! | 1 | #DIV/0! |
| Tdrd5 214575         | -1 | #DIV/0! | 1 | #DIV/0! |
| Olfr478 258729       | -1 | #DIV/0! | 1 | #DIV/0! |
| Olfr427 259162       | -1 | #DIV/0! | 1 | #DIV/0! |
| T 20997              | -1 | #DIV/0! | 1 | #DIV/0! |
| Gabra4 14397         | -1 | #DIV/0! | 1 | #DIV/0! |
| 1700016M24Rik 69439  | -1 | #DIV/0! | 1 | #DIV/0! |
| Trim50 215061        | -1 | #DIV/0! | 1 | #DIV/0! |
| Olfr161 258859       | -1 | #DIV/0! | 1 | #DIV/0! |
| Nxph4 104080         | -1 | #DIV/0! | 1 | #DIV/0! |
| Kcnq3 110862         | -1 | #DIV/0! | 1 | #DIV/0! |
| Lcn5 13863           | -1 | #DIV/0! | 1 | #DIV/0! |
| Eya1 14048           | -1 | #DIV/0! | 1 | #DIV/0! |
| Satl1 73809          | -1 | #DIV/0! | 1 | #DIV/0! |
| Ctrl 109660          | -1 | #DIV/0! | 1 | #DIV/0! |
| Krt28 70843          | -1 | #DIV/0! | 1 | #DIV/0! |
| Olfr825 258672       | -1 | #DIV/0! | 1 | #DIV/0! |
| Mir124a-1 387233     | -1 | #DIV/0! | 1 | #DIV/0! |
| Tmem45b 235135       | -1 | #DIV/0! | 1 | #DIV/0! |
| Vmn1r174 404291      | -1 | #DIV/0! | 1 | #DIV/0! |

|                      |    |         |   |         |
|----------------------|----|---------|---|---------|
| Kprp 433619          | -1 | #DIV/0! | 1 | #DIV/0! |
| Dusp21 73547         | -1 | #DIV/0! | 1 | #DIV/0! |
| Krtap16-1 170651     | -1 | #DIV/0! | 1 | #DIV/0! |
| Opalin 226115        | -1 | #DIV/0! | 1 | #DIV/0! |
| Gm362 236774         | -1 | #DIV/0! | 1 | #DIV/0! |
| Mir672 751535        | -1 | #DIV/0! | 1 | #DIV/0! |
| Slfn4 20558          | -1 | #DIV/0! | 1 | #DIV/0! |
| 4930430D24Rik 194735 | -1 | #DIV/0! | 1 | #DIV/0! |
| Speer9-ps1 73949     | -1 | #DIV/0! | 1 | #DIV/0! |
| Olfr571 259089       | -1 | #DIV/0! | 1 | #DIV/0! |
| Gpr142 217302        | -1 | #DIV/0! | 1 | #DIV/0! |
| Gm14461 329436       | -1 | #DIV/0! | 1 | #DIV/0! |
| Vsig8 240916         | -1 | #DIV/0! | 1 | #DIV/0! |
| Mir201 387197        | -1 | #DIV/0! | 1 | #DIV/0! |
| Stra8 20899          | -1 | #DIV/0! | 1 | #DIV/0! |
| Klrg1 50928          | -1 | #DIV/0! | 1 | #DIV/0! |
| 4931429L15Rik 74361  | -1 | #DIV/0! | 1 | #DIV/0! |
| Mir721 723975        | -1 | #DIV/0! | 1 | #DIV/0! |
| Zdhhc19 245308       | -1 | #DIV/0! | 1 | #DIV/0! |
| Pla2g5 18784         | -1 | #DIV/0! | 1 | #DIV/0! |
| Sall4 99377          | -1 | #DIV/0! | 1 | #DIV/0! |
| Tas2r144 387515      | -1 | #DIV/0! | 1 | #DIV/0! |
| Olfr352 258942       | -1 | #DIV/0! | 1 | #DIV/0! |
| Olfr1371 276865      | -1 | #DIV/0! | 1 | #DIV/0! |
| Alox12b 11686        | -1 | #DIV/0! | 1 | #DIV/0! |
| Olfr1045 259019      | -1 | #DIV/0! | 1 | #DIV/0! |
| Hormad1 67981        | -1 | #DIV/0! | 1 | #DIV/0! |
| 4930417013Rik 73870  | -1 | #DIV/0! | 1 | #DIV/0! |
| Olfr1357 257883      | -1 | #DIV/0! | 1 | #DIV/0! |
| Chrng 11449          | -1 | #DIV/0! | 1 | #DIV/0! |
| Gm10789 100038709    | -1 | #DIV/0! | 1 | #DIV/0! |
| Ctrb1 66473          | -1 | #DIV/0! | 1 | #DIV/0! |
| Ear6 93719           | -1 | #DIV/0! | 1 | #DIV/0! |
| Snord15b 449631      | -1 | #DIV/0! | 1 | #DIV/0! |
| Cryge 12968          | -1 | #DIV/0! | 1 | #DIV/0! |
| Gm4745 194588        | -1 | #DIV/0! | 1 | #DIV/0! |
| Mir470 723873        | -1 | #DIV/0! | 1 | #DIV/0! |
| Mir1894 100316810    | -1 | #DIV/0! | 1 | #DIV/0! |
| Irx4 50916           | -1 | #DIV/0! | 1 | #DIV/0! |
| Cldn13 57255         | -1 | #DIV/0! | 1 | #DIV/0! |
| Mcpt-ps1 17223       | -1 | #DIV/0! | 1 | #DIV/0! |
| Ucma 68527           | -1 | #DIV/0! | 1 | #DIV/0! |
| Olfr1253 258370      | -1 | #DIV/0! | 1 | #DIV/0! |
| Nxph1 18231          | -1 | #DIV/0! | 1 | #DIV/0! |
| Gdpd2 71584          | -1 | #DIV/0! | 1 | #DIV/0! |
| 1700028M03Rik 69460  | -1 | #DIV/0! | 1 | #DIV/0! |
| Olfr56 18356         | -1 | #DIV/0! | 1 | #DIV/0! |
| Npbwr1 226304        | -1 | #DIV/0! | 1 | #DIV/0! |
| Olfr638 259124       | -1 | #DIV/0! | 1 | #DIV/0! |
| Lrp2 14725           | -1 | #DIV/0! | 1 | #DIV/0! |
| Phxr4 18689          | -1 | #DIV/0! | 1 | #DIV/0! |
| Mir453 100124484     | -1 | #DIV/0! | 1 | #DIV/0! |
| Gm6026 547210        | -1 | #DIV/0! | 1 | #DIV/0! |

|                     |    |         |   |         |
|---------------------|----|---------|---|---------|
| Olfr653 57250       | -1 | #DIV/0! | 1 | #DIV/0! |
| Reg3g 19695         | -1 | #DIV/0! | 1 | #DIV/0! |
| BB014433 434285     | -1 | #DIV/0! | 1 | #DIV/0! |
| Zswim2 71861        | -1 | #DIV/0! | 1 | #DIV/0! |
| Tmem200a 77220      | -1 | #DIV/0! | 1 | #DIV/0! |
| Olfr358 227789      | -1 | #DIV/0! | 1 | #DIV/0! |
| Gm4814 100502942    | -1 | #DIV/0! | 1 | #DIV/0! |
| 9430070013Rik 77352 | -1 | #DIV/0! | 1 | #DIV/0! |
| Vmn2r33 624512      | -1 | #DIV/0! | 1 | #DIV/0! |
| Olfr1495 258341     | -1 | #DIV/0! | 1 | #DIV/0! |
| Defb20 319579       | -1 | #DIV/0! | 1 | #DIV/0! |
| Odz4 23966          | -1 | #DIV/0! | 1 | #DIV/0! |
| Klk1b26 16618       | -1 | #DIV/0! | 1 | #DIV/0! |
| 4930470P17Rik 67637 | -1 | #DIV/0! | 1 | #DIV/0! |
| 1810065E05Rik 69864 | -1 | #DIV/0! | 1 | #DIV/0! |
| Chi3l4 104183       | -1 | #DIV/0! | 1 | #DIV/0! |
| Gm12887 666927      | -1 | #DIV/0! | 1 | #DIV/0! |
| Prnd 26434          | -1 | #DIV/0! | 1 | #DIV/0! |
| Mir23a 387216       | -1 | #DIV/0! | 1 | #DIV/0! |
| 1700018B24Rik 66332 | -1 | #DIV/0! | 1 | #DIV/0! |
| Vmn1r179 404286     | -1 | #DIV/0! | 1 | #DIV/0! |
| Arl13a 74448        | -1 | #DIV/0! | 1 | #DIV/0! |
| Snord95 100216540   | -1 | #DIV/0! | 1 | #DIV/0! |
| Mageb4 434903       | -1 | #DIV/0! | 1 | #DIV/0! |
| Slc25a41 103775     | -1 | #DIV/0! | 1 | #DIV/0! |
| Mir598 100124452    | -1 | #DIV/0! | 1 | #DIV/0! |
| Olfr435 258647      | -1 | #DIV/0! | 1 | #DIV/0! |
| Ttc21a 74052        | -1 | #DIV/0! | 1 | #DIV/0! |
| Cldn18 56492        | -1 | #DIV/0! | 1 | #DIV/0! |
| Rhox4b 57737        | -1 | #DIV/0! | 1 | #DIV/0! |
| Olfr1111 258586     | -1 | #DIV/0! | 1 | #DIV/0! |
| Krtap31-2 432602    | -1 | #DIV/0! | 1 | #DIV/0! |
| Iqch 78250          | -1 | #DIV/0! | 1 | #DIV/0! |
| Mir98 723947        | -1 | #DIV/0! | 1 | #DIV/0! |
| 4930426L09Rik 74629 | -1 | #DIV/0! | 1 | #DIV/0! |
| Prl2c5 107849       | -1 | #DIV/0! | 1 | #DIV/0! |
| Olfr1333 258265     | -1 | #DIV/0! | 1 | #DIV/0! |
| Akp3 11648          | -1 | #DIV/0! | 1 | #DIV/0! |
| 4933417A18Rik 66761 | -1 | #DIV/0! | 1 | #DIV/0! |
| Spaca1 67652        | -1 | #DIV/0! | 1 | #DIV/0! |
| Olfr1028 257936     | -1 | #DIV/0! | 1 | #DIV/0! |
| Mir873 100124457    | -1 | #DIV/0! | 1 | #DIV/0! |
| Mir501 751560       | -1 | #DIV/0! | 1 | #DIV/0! |
| Krt27 16675         | -1 | #DIV/0! | 1 | #DIV/0! |
| Asz1 74068          | -1 | #DIV/0! | 1 | #DIV/0! |
| Olfr1294 258887     | -1 | #DIV/0! | 1 | #DIV/0! |
| Defb5 81007         | -1 | #DIV/0! | 1 | #DIV/0! |
| Sele 20339          | -1 | #DIV/0! | 1 | #DIV/0! |
| Spata16 70862       | -1 | #DIV/0! | 1 | #DIV/0! |
| Bglap 12096         | -1 | #DIV/0! | 1 | #DIV/0! |
| Wnt8a 20890         | -1 | #DIV/0! | 1 | #DIV/0! |
| Zfp457 431706       | -1 | #DIV/0! | 1 | #DIV/0! |
| 1700029P11Rik 66346 | -1 | #DIV/0! | 1 | #DIV/0! |

|                     |    |         |   |         |
|---------------------|----|---------|---|---------|
| Olfr1089 257933     | -1 | #DIV/0! | 1 | #DIV/0! |
| Gm6406 623186       | -1 | #DIV/0! | 1 | #DIV/0! |
| Olfr1297 258890     | -1 | #DIV/0! | 1 | #DIV/0! |
| Olfr1446 258699     | -1 | #DIV/0! | 1 | #DIV/0! |
| Oca2 18431          | -1 | #DIV/0! | 1 | #DIV/0! |
| Kcns2 16539         | -1 | #DIV/0! | 1 | #DIV/0! |
| Gdpd3 68616         | -1 | #DIV/0! | 1 | #DIV/0! |
| Tbx15 21384         | -1 | #DIV/0! | 1 | #DIV/0! |
| Olfr807 258931      | -1 | #DIV/0! | 1 | #DIV/0! |
| Hpd1 242642         | -1 | #DIV/0! | 1 | #DIV/0! |
| Olfr816 258667      | -1 | #DIV/0! | 1 | #DIV/0! |
| Fosl1 14283         | -1 | #DIV/0! | 1 | #DIV/0! |
| Snord68 100302565   | -1 | #DIV/0! | 1 | #DIV/0! |
| Olfr145 258310      | -1 | #DIV/0! | 1 | #DIV/0! |
| Lipm 78753          | -1 | #DIV/0! | 1 | #DIV/0! |
| Vwa5b2 328643       | -1 | #DIV/0! | 1 | #DIV/0! |
| Mir671 735264       | -1 | #DIV/0! | 1 | #DIV/0! |
| Al747448 99709      | -1 | #DIV/0! | 1 | #DIV/0! |
| Olfr860 258521      | -1 | #DIV/0! | 1 | #DIV/0! |
| Snord53 100217456   | -1 | #DIV/0! | 1 | #DIV/0! |
| Olfr690 56860       | -1 | #DIV/0! | 1 | #DIV/0! |
| Gm15107 434864      | -1 | #DIV/0! | 1 | #DIV/0! |
| Cpa3 12873          | -1 | #DIV/0! | 1 | #DIV/0! |
| Vmn1r16 171202      | -1 | #DIV/0! | 1 | #DIV/0! |
| Fgf14 14169         | -1 | #DIV/0! | 1 | #DIV/0! |
| Fcrlb 435653        | -1 | #DIV/0! | 1 | #DIV/0! |
| Snora21 100302498   | -1 | #DIV/0! | 1 | #DIV/0! |
| Samd7 75953         | -1 | #DIV/0! | 1 | #DIV/0! |
| Vmn1r225 171228     | -1 | #DIV/0! | 1 | #DIV/0! |
| Tmprss11f 243083    | -1 | #DIV/0! | 1 | #DIV/0! |
| Olfr624 258189      | -1 | #DIV/0! | 1 | #DIV/0! |
| Olfr178 258999      | -1 | #DIV/0! | 1 | #DIV/0! |
| Drd3 13490          | -1 | #DIV/0! | 1 | #DIV/0! |
| Hist1h2bl 319185    | -1 | #DIV/0! | 1 | #DIV/0! |
| Muc13 17063         | -1 | #DIV/0! | 1 | #DIV/0! |
| Ccnb3 209091        | -1 | #DIV/0! | 1 | #DIV/0! |
| Cdhr4 69398         | -1 | #DIV/0! | 1 | #DIV/0! |
| Slc32a1 22348       | -1 | #DIV/0! | 1 | #DIV/0! |
| Ccdc87 399599       | -1 | #DIV/0! | 1 | #DIV/0! |
| Prrxl1 107751       | -1 | #DIV/0! | 1 | #DIV/0! |
| Lyg1 69541          | -1 | #DIV/0! | 1 | #DIV/0! |
| Vmn1r44 113854      | -1 | #DIV/0! | 1 | #DIV/0! |
| Pla2g2e 26970       | -1 | #DIV/0! | 1 | #DIV/0! |
| Gm9871 207157       | -1 | #DIV/0! | 1 | #DIV/0! |
| Olfr1043 258570     | -1 | #DIV/0! | 1 | #DIV/0! |
| Gm5084 100503759    | -1 | #DIV/0! | 1 | #DIV/0! |
| Vmn1r76 171239      | -1 | #DIV/0! | 1 | #DIV/0! |
| 1700031F05Rik 73300 | -1 | #DIV/0! | 1 | #DIV/0! |
| Mir3078 100526520   | -1 | #DIV/0! | 1 | #DIV/0! |
| Mir423 751519       | -1 | #DIV/0! | 1 | #DIV/0! |
| Chodl 246048        | -1 | #DIV/0! | 1 | #DIV/0! |
| Mir212 387208       | -1 | #DIV/0! | 1 | #DIV/0! |
| Spr4 229562         | -1 | #DIV/0! | 1 | #DIV/0! |

|                      |    |         |   |         |
|----------------------|----|---------|---|---------|
| 1700018A14Rik 69391  | -1 | #DIV/0! | 1 | #DIV/0! |
| Riiad1 66353         | -1 | #DIV/0! | 1 | #DIV/0! |
| Gm4710 100043885     | -1 | #DIV/0! | 1 | #DIV/0! |
| Olfr1338 258259      | -1 | #DIV/0! | 1 | #DIV/0! |
| Gm6588 625464        | -1 | #DIV/0! | 1 | #DIV/0! |
| A630010A05Rik 545280 | -1 | #DIV/0! | 1 | #DIV/0! |
| Tas2r120 387348      | -1 | #DIV/0! | 1 | #DIV/0! |
| Scarna13 100306943   | -1 | #DIV/0! | 1 | #DIV/0! |
| Mir684-1 735274      | -1 | #DIV/0! | 1 | #DIV/0! |
| Mirlet7f-2 387253    | -1 | #DIV/0! | 1 | #DIV/0! |
| Pdyn 18610           | -1 | #DIV/0! | 1 | #DIV/0! |
| Olfr197 258477       | -1 | #DIV/0! | 1 | #DIV/0! |
| Gm7714 665615        | -1 | #DIV/0! | 1 | #DIV/0! |
| Tex21 80384          | -1 | #DIV/0! | 1 | #DIV/0! |
| Tas2r138 387513      | -1 | #DIV/0! | 1 | #DIV/0! |
| Cbln1 12404          | -1 | #DIV/0! | 1 | #DIV/0! |
| Best2 212989         | -1 | #DIV/0! | 1 | #DIV/0! |
| Olfr902 258798       | -1 | #DIV/0! | 1 | #DIV/0! |
| Olfr1128 258346      | -1 | #DIV/0! | 1 | #DIV/0! |
| E430016F16Rik 414121 | -1 | #DIV/0! | 1 | #DIV/0! |
| Lhcgr 16867          | -1 | #DIV/0! | 1 | #DIV/0! |
| Olfr31 18330         | -1 | #DIV/0! | 1 | #DIV/0! |
| Hoxc6 15425          | -1 | #DIV/0! | 1 | #DIV/0! |
| Speer4d 360220       | -1 | #DIV/0! | 1 | #DIV/0! |
| Snord55 100216533    | -1 | #DIV/0! | 1 | #DIV/0! |
| Nppb 18158           | -1 | #DIV/0! | 1 | #DIV/0! |
| S100a5 20199         | -1 | #DIV/0! | 1 | #DIV/0! |
| Clrn1 229320         | -1 | #DIV/0! | 1 | #DIV/0! |
| Hoxd4 15436          | -1 | #DIV/0! | 1 | #DIV/0! |
| Vmn1r221 100312485   | -1 | #DIV/0! | 1 | #DIV/0! |
| Gm13083 279185       | -1 | #DIV/0! | 1 | #DIV/0! |
| Rhox2g 434766        | -1 | #DIV/0! | 1 | #DIV/0! |
| Olfr1199 258450      | -1 | #DIV/0! | 1 | #DIV/0! |
| Mir3066 100526470    | -1 | #DIV/0! | 1 | #DIV/0! |
| Olfr1234 258975      | -1 | #DIV/0! | 1 | #DIV/0! |
| Skor2 664805         | -1 | #DIV/0! | 1 | #DIV/0! |
| Krtap1-3 435273      | -1 | #DIV/0! | 1 | #DIV/0! |
| Il28b 338374         | -1 | #DIV/0! | 1 | #DIV/0! |
| 1700034I23Rik 73297  | -1 | #DIV/0! | 1 | #DIV/0! |
| Lrguk 74354          | -1 | #DIV/0! | 1 | #DIV/0! |
| Olfr746 258295       | -1 | #DIV/0! | 1 | #DIV/0! |
| C130071C03Rik 320203 | -1 | #DIV/0! | 1 | #DIV/0! |
| Mis18bp1 217653      | -1 | #DIV/0! | 1 | #DIV/0! |
| Morc1 17450          | -1 | #DIV/0! | 1 | #DIV/0! |
| Alk 11682            | -1 | #DIV/0! | 1 | #DIV/0! |
| Klf17 75753          | -1 | #DIV/0! | 1 | #DIV/0! |
| Snord82 80828        | -1 | #DIV/0! | 1 | #DIV/0! |
| Mir124a-2 723950     | -1 | #DIV/0! | 1 | #DIV/0! |
| Clca3 23844          | -1 | #DIV/0! | 1 | #DIV/0! |
| Olfr51 18351         | -1 | #DIV/0! | 1 | #DIV/0! |
| Bnc2 242509          | -1 | #DIV/0! | 1 | #DIV/0! |
| Cib4 73259           | -1 | #DIV/0! | 1 | #DIV/0! |
| Snord37 100217454    | -1 | #DIV/0! | 1 | #DIV/0! |

|                      |    |         |   |         |
|----------------------|----|---------|---|---------|
| Olf633 258351        | -1 | #DIV/0! | 1 | #DIV/0! |
| Tmco5 67356          | -1 | #DIV/0! | 1 | #DIV/0! |
| Col9a2 12840         | -1 | #DIV/0! | 1 | #DIV/0! |
| 4933434I20Rik 67555  | -1 | #DIV/0! | 1 | #DIV/0! |
| Mmel1 27390          | -1 | #DIV/0! | 1 | #DIV/0! |
| Gzmf 14943           | -1 | #DIV/0! | 1 | #DIV/0! |
| Mbd3l1 73503         | -1 | #DIV/0! | 1 | #DIV/0! |
| Nhedc1 74446         | -1 | #DIV/0! | 1 | #DIV/0! |
| Mir669a-3 735272     | -1 | #DIV/0! | 1 | #DIV/0! |
| Serpib3b 383548      | -1 | #DIV/0! | 1 | #DIV/0! |
| Ccdc105 70976        | -1 | #DIV/0! | 1 | #DIV/0! |
| Tas2r125 387352      | -1 | #DIV/0! | 1 | #DIV/0! |
| Ccdc33 382077        | -1 | #DIV/0! | 1 | #DIV/0! |
| Bmpr1b 12167         | -1 | #DIV/0! | 1 | #DIV/0! |
| Zscan30 328918       | -1 | #DIV/0! | 1 | #DIV/0! |
| Ntsr1 18216          | -1 | #DIV/0! | 1 | #DIV/0! |
| H2-M10.3 110696      | -1 | #DIV/0! | 1 | #DIV/0! |
| Ccdc60 269693        | -1 | #DIV/0! | 1 | #DIV/0! |
| Gm2897 100040671     | -1 | #DIV/0! | 1 | #DIV/0! |
| Rhox6 19202          | -1 | #DIV/0! | 1 | #DIV/0! |
| Hist1h2ai 319191     | -1 | #DIV/0! | 1 | #DIV/0! |
| Olf95 18359          | -1 | #DIV/0! | 1 | #DIV/0! |
| Mir337 723843        | -1 | #DIV/0! | 1 | #DIV/0! |
| Cyp2ab1 224044       | -1 | #DIV/0! | 1 | #DIV/0! |
| A230065H16Rik 380787 | -1 | #DIV/0! | 1 | #DIV/0! |
| Lce1b 68720          | -1 | #DIV/0! | 1 | #DIV/0! |
| Tas2r108 57253       | -1 | #DIV/0! | 1 | #DIV/0! |
| Olf1233 258974       | -1 | #DIV/0! | 1 | #DIV/0! |
| Tcam1 75870          | -1 | #DIV/0! | 1 | #DIV/0! |
| Lilra6 18726         | -1 | #DIV/0! | 1 | #DIV/0! |
| Myl1 17901           | -1 | #DIV/0! | 1 | #DIV/0! |
| Gpx5 14780           | -1 | #DIV/0! | 1 | #DIV/0! |
| Cts3 117066          | -1 | #DIV/0! | 1 | #DIV/0! |
| Vmn1r70 171262       | -1 | #DIV/0! | 1 | #DIV/0! |
| Sorcs1 58178         | -1 | #DIV/0! | 1 | #DIV/0! |
| Mir1937b-2 100499520 | -1 | #DIV/0! | 1 | #DIV/0! |
| Olf976 258364        | -1 | #DIV/0! | 1 | #DIV/0! |
| Hist1h2bj 319183     | -1 | #DIV/0! | 1 | #DIV/0! |
| Mir1948 100316699    | -1 | #DIV/0! | 1 | #DIV/0! |
| Best1 24115          | -1 | #DIV/0! | 1 | #DIV/0! |
| Mir669e 100316806    | -1 | #DIV/0! | 1 | #DIV/0! |
| 4931406H21Rik 77592  | -1 | #DIV/0! | 1 | #DIV/0! |
| Serpib9c 20707       | -1 | #DIV/0! | 1 | #DIV/0! |
| Krt5 110308          | -1 | #DIV/0! | 1 | #DIV/0! |
| Ankmy1 241158        | -1 | #DIV/0! | 1 | #DIV/0! |
| Olf1164 258634       | -1 | #DIV/0! | 1 | #DIV/0! |
| Serpini2 67931       | -1 | #DIV/0! | 1 | #DIV/0! |
| Vmn1r198 171254      | -1 | #DIV/0! | 1 | #DIV/0! |
| Aadacl3 230883       | -1 | #DIV/0! | 1 | #DIV/0! |
| Mepe 94111           | -1 | #DIV/0! | 1 | #DIV/0! |
| Olf391-ps 258236     | -1 | #DIV/0! | 1 | #DIV/0! |
| Vmn2r49 625605       | -1 | #DIV/0! | 1 | #DIV/0! |
| Grp 225642           | -1 | #DIV/0! | 1 | #DIV/0! |



|                      |    |         |   |         |
|----------------------|----|---------|---|---------|
| Olfr314 257917       | -1 | #DIV/0! | 1 | #DIV/0! |
| Olfr1505 258151      | -1 | #DIV/0! | 1 | #DIV/0! |
| Vmn2r99 665376       | -1 | #DIV/0! | 1 | #DIV/0! |
| Mir1298 100526462    | -1 | #DIV/0! | 1 | #DIV/0! |
| Olfr1335 435804      | -1 | #DIV/0! | 1 | #DIV/0! |
| Prap1 22264          | -1 | #DIV/0! | 1 | #DIV/0! |
| Ncapg 54392          | -1 | #DIV/0! | 1 | #DIV/0! |
| Gpr87 84111          | -1 | #DIV/0! | 1 | #DIV/0! |
| Ffar1 233081         | -1 | #DIV/0! | 1 | #DIV/0! |
| Vmn2r60 637898       | -1 | #DIV/0! | 1 | #DIV/0! |
| Mir30c-2 723964      | -1 | #DIV/0! | 1 | #DIV/0! |
| Olfr380 259027       | -1 | #DIV/0! | 1 | #DIV/0! |
| C87499 381590        | -1 | #DIV/0! | 1 | #DIV/0! |
| Olfr551 258750       | -1 | #DIV/0! | 1 | #DIV/0! |
| Rln3 212108          | -1 | #DIV/0! | 1 | #DIV/0! |
| Gtf2a1 71828         | -1 | #DIV/0! | 1 | #DIV/0! |
| Ccin 442829          | -1 | #DIV/0! | 1 | #DIV/0! |
| Olfr10 18307         | -1 | #DIV/0! | 1 | #DIV/0! |
| 1700016K19Rik 74230  | -1 | #DIV/0! | 1 | #DIV/0! |
| Olfr670 384703       | -1 | #DIV/0! | 1 | #DIV/0! |
| Trpc7 26946          | -1 | #DIV/0! | 1 | #DIV/0! |
| Olfr125 258287       | -1 | #DIV/0! | 1 | #DIV/0! |
| Gm2694 100040294     | -1 | #DIV/0! | 1 | #DIV/0! |
| Fstl5 213262         | -1 | #DIV/0! | 1 | #DIV/0! |
| Gm41 245502          | -1 | #DIV/0! | 1 | #DIV/0! |
| 6030468B19Rik 77727  | -1 | #DIV/0! | 1 | #DIV/0! |
| D130009I18Rik 320249 | -1 | #DIV/0! | 1 | #DIV/0! |
| Svs2 53878           | -1 | #DIV/0! | 1 | #DIV/0! |
| Mir488 735253        | -1 | #DIV/0! | 1 | #DIV/0! |
| 4921509C19Rik 381393 | -1 | #DIV/0! | 1 | #DIV/0! |
| Vmn1r168 100043101   | -1 | #DIV/0! | 1 | #DIV/0! |
| Casp14 12365         | -1 | #DIV/0! | 1 | #DIV/0! |
| 4930451C15Rik 74685  | -1 | #DIV/0! | 1 | #DIV/0! |
| 9430007A20Rik 381572 | -1 | #DIV/0! | 1 | #DIV/0! |
| Cntn1 12805          | -1 | #DIV/0! | 1 | #DIV/0! |
| 4931429I11Rik 70989  | -1 | #DIV/0! | 1 | #DIV/0! |
| Oas1d 100535         | -1 | #DIV/0! | 1 | #DIV/0! |
| Cd226 225825         | -1 | #DIV/0! | 1 | #DIV/0! |
| Oprk1 18387          | -1 | #DIV/0! | 1 | #DIV/0! |
| Olfr640 258819       | -1 | #DIV/0! | 1 | #DIV/0! |
| Spaca4 69363         | -1 | #DIV/0! | 1 | #DIV/0! |
| Cldn24 100039801     | -1 | #DIV/0! | 1 | #DIV/0! |
| Lrrc10b 278795       | -1 | #DIV/0! | 1 | #DIV/0! |
| Neil3 234258         | -1 | #DIV/0! | 1 | #DIV/0! |
| Zdhhc23 332175       | -1 | #DIV/0! | 1 | #DIV/0! |
| Isl1 16392           | -1 | #DIV/0! | 1 | #DIV/0! |
| Olfr318 258494       | -1 | #DIV/0! | 1 | #DIV/0! |
| Fam23a 625286        | -1 | #DIV/0! | 1 | #DIV/0! |
| Gm8439 667063        | -1 | #DIV/0! | 1 | #DIV/0! |
| Tcl1b3 27378         | -1 | #DIV/0! | 1 | #DIV/0! |
| Dmc1 13404           | -1 | #DIV/0! | 1 | #DIV/0! |
| Gm904 380845         | -1 | #DIV/0! | 1 | #DIV/0! |
| Olfr761 258094       | -1 | #DIV/0! | 1 | #DIV/0! |

|                      |    |         |   |         |
|----------------------|----|---------|---|---------|
| Olfr39 258822        | -1 | #DIV/0! | 1 | #DIV/0! |
| Mir3106 100526464    | -1 | #DIV/0! | 1 | #DIV/0! |
| 4930504013Rik 403200 | -1 | #DIV/0! | 1 | #DIV/0! |
| Rhox2d 434760        | -1 | #DIV/0! | 1 | #DIV/0! |
| H2-M2 14990          | -1 | #DIV/0! | 1 | #DIV/0! |
| Otud7a 170711        | -1 | #DIV/0! | 1 | #DIV/0! |
| Speer1-ps1 70896     | -1 | #DIV/0! | 1 | #DIV/0! |
| Gdf11 14561          | -1 | #DIV/0! | 1 | #DIV/0! |
| Fshb 14308           | -1 | #DIV/0! | 1 | #DIV/0! |
| Kcnk16 74571         | -1 | #DIV/0! | 1 | #DIV/0! |
| Olfr619 259080       | -1 | #DIV/0! | 1 | #DIV/0! |
| Olfr147 258869       | -1 | #DIV/0! | 1 | #DIV/0! |
| Gucy1b2 239134       | -1 | #DIV/0! | 1 | #DIV/0! |
| Elavl3 15571         | -1 | #DIV/0! | 1 | #DIV/0! |
| Ott 18422            | -1 | #DIV/0! | 1 | #DIV/0! |
| Mir505 751545        | -1 | #DIV/0! | 1 | #DIV/0! |
| Il9 16198            | -1 | #DIV/0! | 1 | #DIV/0! |
| Olfr705 259034       | -1 | #DIV/0! | 1 | #DIV/0! |
| Olfr457 258989       | -1 | #DIV/0! | 1 | #DIV/0! |
| Olfr1189 258768      | -1 | #DIV/0! | 1 | #DIV/0! |
| Hbb-bh1 15132        | -1 | #DIV/0! | 1 | #DIV/0! |
| Vmn1r73 171237       | -1 | #DIV/0! | 1 | #DIV/0! |
| Tacstd2 56753        | -1 | #DIV/0! | 1 | #DIV/0! |
| Zic1 22771           | -1 | #DIV/0! | 1 | #DIV/0! |
| Olfr1391 258460      | -1 | #DIV/0! | 1 | #DIV/0! |
| Nmu 56183            | -1 | #DIV/0! | 1 | #DIV/0! |
| Olig3 94222          | -1 | #DIV/0! | 1 | #DIV/0! |
| Defb9 246079         | -1 | #DIV/0! | 1 | #DIV/0! |
| Olfr464 258407       | -1 | #DIV/0! | 1 | #DIV/0! |
| Il17b 56069          | -1 | #DIV/0! | 1 | #DIV/0! |
| Nr2e3 23958          | -1 | #DIV/0! | 1 | #DIV/0! |
| Olfr714 259035       | -1 | #DIV/0! | 1 | #DIV/0! |
| Prl2c1 666317        | -1 | #DIV/0! | 1 | #DIV/0! |
| Fbxw20 434440        | -1 | #DIV/0! | 1 | #DIV/0! |
| 4921517D21Rik 67722  | -1 | #DIV/0! | 1 | #DIV/0! |
| Gfra4 14588          | -1 | #DIV/0! | 1 | #DIV/0! |
| Olfr773 257664       | -1 | #DIV/0! | 1 | #DIV/0! |
| Snord61 353374       | -1 | #DIV/0! | 1 | #DIV/0! |
| 1700024P04Rik 69382  | -1 | #DIV/0! | 1 | #DIV/0! |
| Grid2ip 170935       | -1 | #DIV/0! | 1 | #DIV/0! |
| Ucn3 83428           | -1 | #DIV/0! | 1 | #DIV/0! |
| Znrf4 20834          | -1 | #DIV/0! | 1 | #DIV/0! |
| Noxa1 241275         | -1 | #DIV/0! | 1 | #DIV/0! |
| Mir1953 100316704    | -1 | #DIV/0! | 1 | #DIV/0! |
| Ccdc54 69339         | -1 | #DIV/0! | 1 | #DIV/0! |
| Sfn14-ps 237890      | -1 | #DIV/0! | 1 | #DIV/0! |
| Gm364 245423         | -1 | #DIV/0! | 1 | #DIV/0! |
| Gh 14599             | -1 | #DIV/0! | 1 | #DIV/0! |
| Mmp10 17384          | -1 | #DIV/0! | 1 | #DIV/0! |
| Olfr733 258657       | -1 | #DIV/0! | 1 | #DIV/0! |
| Rnase11 497113       | -1 | #DIV/0! | 1 | #DIV/0! |
| Olfr330 258879       | -1 | #DIV/0! | 1 | #DIV/0! |
| Mir463 723887        | -1 | #DIV/0! | 1 | #DIV/0! |

|                      |    |         |   |         |
|----------------------|----|---------|---|---------|
| Spn-ps 20738         | -1 | #DIV/0! | 1 | #DIV/0! |
| Olf495 258361        | -1 | #DIV/0! | 1 | #DIV/0! |
| Rhpn1 14787          | -1 | #DIV/0! | 1 | #DIV/0! |
| Olf995 258426        | -1 | #DIV/0! | 1 | #DIV/0! |
| Olf421 258715        | -1 | #DIV/0! | 1 | #DIV/0! |
| Olf157 100040268     | -1 | #DIV/0! | 1 | #DIV/0! |
| Defb4 56519          | -1 | #DIV/0! | 1 | #DIV/0! |
| Mir369 723933        | -1 | #DIV/0! | 1 | #DIV/0! |
| Glr3 110304          | -1 | #DIV/0! | 1 | #DIV/0! |
| 2010317E24Rik 72080  | -1 | #DIV/0! | 1 | #DIV/0! |
| Adam28 13522         | -1 | #DIV/0! | 1 | #DIV/0! |
| Olf663 257914        | -1 | #DIV/0! | 1 | #DIV/0! |
| Gm6904 628693        | -1 | #DIV/0! | 1 | #DIV/0! |
| Olf183 258478        | -1 | #DIV/0! | 1 | #DIV/0! |
| Gm2049 100039109     | -1 | #DIV/0! | 1 | #DIV/0! |
| Gm4541 100043595     | -1 | #DIV/0! | 1 | #DIV/0! |
| Fam131b 76156        | -1 | #DIV/0! | 1 | #DIV/0! |
| Slc35d3 76157        | -1 | #DIV/0! | 1 | #DIV/0! |
| Hist1h2br 665622     | -1 | #DIV/0! | 1 | #DIV/0! |
| Vmn2r25 545874       | -1 | #DIV/0! | 1 | #DIV/0! |
| Cacng5 140723        | -1 | #DIV/0! | 1 | #DIV/0! |
| Olf57 18357          | -1 | #DIV/0! | 1 | #DIV/0! |
| Ccdc81 70884         | -1 | #DIV/0! | 1 | #DIV/0! |
| Spr1b 20754          | -1 | #DIV/0! | 1 | #DIV/0! |
| Col25a1 77018        | -1 | #DIV/0! | 1 | #DIV/0! |
| Vmn1r132 100043604   | -1 | #DIV/0! | 1 | #DIV/0! |
| Tarm1 245126         | -1 | #DIV/0! | 1 | #DIV/0! |
| Ceacam-ps1 100038912 | -1 | #DIV/0! | 1 | #DIV/0! |
| Morn3 74890          | -1 | #DIV/0! | 1 | #DIV/0! |
| Mir1929 100316688    | -1 | #DIV/0! | 1 | #DIV/0! |
| Hapln2 73940         | -1 | #DIV/0! | 1 | #DIV/0! |
| Vmn1r74 171240       | -1 | #DIV/0! | 1 | #DIV/0! |
| Pom121l12 432536     | -1 | #DIV/0! | 1 | #DIV/0! |
| C130026L21Rik 330164 | -1 | #DIV/0! | 1 | #DIV/0! |
| 41166 74222          | -1 | #DIV/0! | 1 | #DIV/0! |
| Mir26b 387219        | -1 | #DIV/0! | 1 | #DIV/0! |
| Usp51 635253         | -1 | #DIV/0! | 1 | #DIV/0! |
| Hspb9 75482          | -1 | #DIV/0! | 1 | #DIV/0! |
| Olf1410 258484       | -1 | #DIV/0! | 1 | #DIV/0! |
| Dusp13 27389         | -1 | #DIV/0! | 1 | #DIV/0! |
| Vmn2r111 210876      | -1 | #DIV/0! | 1 | #DIV/0! |
| Lgals12 56072        | -1 | #DIV/0! | 1 | #DIV/0! |
| Vmn1r-ps103 171245   | -1 | #DIV/0! | 1 | #DIV/0! |
| 2900041M22Rik 78403  | -1 | #DIV/0! | 1 | #DIV/0! |
| Vmn2r121 100038941   | -1 | #DIV/0! | 1 | #DIV/0! |
| Wbp2nl 74716         | -1 | #DIV/0! | 1 | #DIV/0! |
| Mrgpra9 668725       | -1 | #DIV/0! | 1 | #DIV/0! |
| 2810429I04Rik 76937  | -1 | #DIV/0! | 1 | #DIV/0! |
| Pyy 217212           | -1 | #DIV/0! | 1 | #DIV/0! |
| Mir449c 735309       | -1 | #DIV/0! | 1 | #DIV/0! |
| Prpmp5 381832        | -1 | #DIV/0! | 1 | #DIV/0! |
| Sfta2 433102         | -1 | #DIV/0! | 1 | #DIV/0! |
| Olf591 258139        | -1 | #DIV/0! | 1 | #DIV/0! |

|                     |    |         |   |         |
|---------------------|----|---------|---|---------|
| Gm4177 100043025    | -1 | #DIV/0! | 1 | #DIV/0! |
| Mc2r 17200          | -1 | #DIV/0! | 1 | #DIV/0! |
| Gm14484 547160      | -1 | #DIV/0! | 1 | #DIV/0! |
| Mir744 791070       | -1 | #DIV/0! | 1 | #DIV/0! |
| Olfr822 258666      | -1 | #DIV/0! | 1 | #DIV/0! |
| Pcdh19 279653       | -1 | #DIV/0! | 1 | #DIV/0! |
| Cldn19 242653       | -1 | #DIV/0! | 1 | #DIV/0! |
| Fam71f1 330277      | -1 | #DIV/0! | 1 | #DIV/0! |
| Olfr498 258304      | -1 | #DIV/0! | 1 | #DIV/0! |
| Zic5 65100          | -1 | #DIV/0! | 1 | #DIV/0! |
| 4930430A15Rik 67575 | -1 | #DIV/0! | 1 | #DIV/0! |
| Olfr672 258755      | -1 | #DIV/0! | 1 | #DIV/0! |
| Mir465c-1 100124441 | -1 | #DIV/0! | 1 | #DIV/0! |
| Bpifa6 545477       | -1 | #DIV/0! | 1 | #DIV/0! |
| Il13 16163          | -1 | #DIV/0! | 1 | #DIV/0! |
| Gm16387 100038914   | -1 | #DIV/0! | 1 | #DIV/0! |
| Tmem72 319776       | -1 | #DIV/0! | 1 | #DIV/0! |
| St8sia6 241230      | -1 | #DIV/0! | 1 | #DIV/0! |
| Mir763 791076       | -1 | #DIV/0! | 1 | #DIV/0! |
| Gm4922 237300       | -1 | #DIV/0! | 1 | #DIV/0! |
| Olfr218 258880      | -1 | #DIV/0! | 1 | #DIV/0! |
| Ern2 26918          | -1 | #DIV/0! | 1 | #DIV/0! |
| Luzp2 233271        | -1 | #DIV/0! | 1 | #DIV/0! |
| Mir132 387150       | -1 | #DIV/0! | 1 | #DIV/0! |
| Myo3b 329421        | -1 | #DIV/0! | 1 | #DIV/0! |
| Fgf23 64654         | -1 | #DIV/0! | 1 | #DIV/0! |
| Fbxo41 330369       | -1 | #DIV/0! | 1 | #DIV/0! |
| Mir219-1 723823     | -1 | #DIV/0! | 1 | #DIV/0! |
| Mir551b 791072      | -1 | #DIV/0! | 1 | #DIV/0! |
| Vmn2r26 56552       | -1 | #DIV/0! | 1 | #DIV/0! |
| Mir669g 100316802   | -1 | #DIV/0! | 1 | #DIV/0! |
| Chrna9 231252       | -1 | #DIV/0! | 1 | #DIV/0! |
| Terc 21748          | -1 | #DIV/0! | 1 | #DIV/0! |
| Olfr1418 258227     | -1 | #DIV/0! | 1 | #DIV/0! |
| Chrm4 12672         | -1 | #DIV/0! | 1 | #DIV/0! |
| Vmn1r159 670857     | -1 | #DIV/0! | 1 | #DIV/0! |
| Mageb16 71967       | -1 | #DIV/0! | 1 | #DIV/0! |
| Hist1h2ba 319177    | -1 | #DIV/0! | 1 | #DIV/0! |
| Ppp2r2b 72930       | -1 | #DIV/0! | 1 | #DIV/0! |
| Kcnmb3 100502876    | -1 | #DIV/0! | 1 | #DIV/0! |
| Dydc1 69496         | -1 | #DIV/0! | 1 | #DIV/0! |
| Mtnr1b 244701       | -1 | #DIV/0! | 1 | #DIV/0! |
| Mir1187 100316803   | -1 | #DIV/0! | 1 | #DIV/0! |
| Rex2 100043034      | -1 | #DIV/0! | 1 | #DIV/0! |
| Adam24 13526        | -1 | #DIV/0! | 1 | #DIV/0! |
| Gm5615 434396       | -1 | #DIV/0! | 1 | #DIV/0! |
| Hoxc8 15426         | -1 | #DIV/0! | 1 | #DIV/0! |
| Gpr21 338346        | -1 | #DIV/0! | 1 | #DIV/0! |
| Sorcs3 66673        | -1 | #DIV/0! | 1 | #DIV/0! |
| Fam71a 619288       | -1 | #DIV/0! | 1 | #DIV/0! |
| Olfr5 18349         | -1 | #DIV/0! | 1 | #DIV/0! |
| Olfr1449 258300     | -1 | #DIV/0! | 1 | #DIV/0! |
| Rimkla 194237       | -1 | #DIV/0! | 1 | #DIV/0! |

|                       |    |         |   |         |
|-----------------------|----|---------|---|---------|
| Vmn1r194 626299       | -1 | #DIV/0! | 1 | #DIV/0! |
| Olfr1136 258653       | -1 | #DIV/0! | 1 | #DIV/0! |
| Snord73a 19870        | -1 | #DIV/0! | 1 | #DIV/0! |
| Cldn20 621628         | -1 | #DIV/0! | 1 | #DIV/0! |
| Gm13298 545611        | -1 | #DIV/0! | 1 | #DIV/0! |
| Hcrt 15171            | -1 | #DIV/0! | 1 | #DIV/0! |
| Adora2b 11541         | -1 | #DIV/0! | 1 | #DIV/0! |
| Olfr1472 258685       | -1 | #DIV/0! | 1 | #DIV/0! |
| Zscan4e 665848        | -1 | #DIV/0! | 1 | #DIV/0! |
| Olfr267 258922        | -1 | #DIV/0! | 1 | #DIV/0! |
| Olfr678 258753        | -1 | #DIV/0! | 1 | #DIV/0! |
| Hdhd1a 67365          | -1 | #DIV/0! | 1 | #DIV/0! |
| Olfr65 18365          | -1 | #DIV/0! | 1 | #DIV/0! |
| Klk9 101533           | -1 | #DIV/0! | 1 | #DIV/0! |
| Wdr17 244484          | -1 | #DIV/0! | 1 | #DIV/0! |
| 9530036011Rik 654796  | -1 | #DIV/0! | 1 | #DIV/0! |
| Gm773 331416          | -1 | #DIV/0! | 1 | #DIV/0! |
| Olfr150 258602        | -1 | #DIV/0! | 1 | #DIV/0! |
| 2210415F13Rik 70163   | -1 | #DIV/0! | 1 | #DIV/0! |
| Mageb16-ps1 100039436 | -1 | #DIV/0! | 1 | #DIV/0! |
| 4932411G14Rik 238663  | -1 | #DIV/0! | 1 | #DIV/0! |
| 1700017N19Rik 66605   | -1 | #DIV/0! | 1 | #DIV/0! |
| Vmn2r74 546980        | -1 | #DIV/0! | 1 | #DIV/0! |
| Olfr360 258615        | -1 | #DIV/0! | 1 | #DIV/0! |
| Mir128-1 387147       | -1 | #DIV/0! | 1 | #DIV/0! |
| Rergl 632971          | -1 | #DIV/0! | 1 | #DIV/0! |
| Krtap4-7 76444        | -1 | #DIV/0! | 1 | #DIV/0! |
| Mir324 723896         | -1 | #DIV/0! | 1 | #DIV/0! |
| Gm10636 100038607     | -1 | #DIV/0! | 1 | #DIV/0! |
| Grip1 74053           | -1 | #DIV/0! | 1 | #DIV/0! |
| Mir367 723911         | -1 | #DIV/0! | 1 | #DIV/0! |
| Gm5416 408196         | -1 | #DIV/0! | 1 | #DIV/0! |
| Gm766 330440          | -1 | #DIV/0! | 1 | #DIV/0! |
| Jakmip2 76217         | -1 | #DIV/0! | 1 | #DIV/0! |
| Gpr50 14765           | -1 | #DIV/0! | 1 | #DIV/0! |
| Zcchc13 75064         | -1 | #DIV/0! | 1 | #DIV/0! |
| Cct8l1 242891         | -1 | #DIV/0! | 1 | #DIV/0! |
| Gsdmc 83492           | -1 | #DIV/0! | 1 | #DIV/0! |
| Nup210l 77595         | -1 | #DIV/0! | 1 | #DIV/0! |
| 4931406B18Rik 74054   | -1 | #DIV/0! | 1 | #DIV/0! |
| Mrgpra6 381886        | -1 | #DIV/0! | 1 | #DIV/0! |
| Pthlh 19227           | -1 | #DIV/0! | 1 | #DIV/0! |
| Hist1h2bh 319182      | -1 | #DIV/0! | 1 | #DIV/0! |
| Olfr121 258622        | -1 | #DIV/0! | 1 | #DIV/0! |
| 1700014N06Rik 69389   | -1 | #DIV/0! | 1 | #DIV/0! |
| Hpcal4 170638         | -1 | #DIV/0! | 1 | #DIV/0! |
| Cst12 69362           | -1 | #DIV/0! | 1 | #DIV/0! |
| Phkg1 18682           | -1 | #DIV/0! | 1 | #DIV/0! |
| InsI5 23919           | -1 | #DIV/0! | 1 | #DIV/0! |
| Olfr1339 258851       | -1 | #DIV/0! | 1 | #DIV/0! |
| 2010109I03Rik 67038   | -1 | #DIV/0! | 1 | #DIV/0! |
| Agbl2 271813          | -1 | #DIV/0! | 1 | #DIV/0! |
| Olfr429 258717        | -1 | #DIV/0! | 1 | #DIV/0! |

|                      |    |         |   |         |
|----------------------|----|---------|---|---------|
| Olfr1436 258682      | -1 | #DIV/0! | 1 | #DIV/0! |
| 6230409E13Rik 76132  | -1 | #DIV/0! | 1 | #DIV/0! |
| Gm6289 622139        | -1 | #DIV/0! | 1 | #DIV/0! |
| Rxfp1 381489         | -1 | #DIV/0! | 1 | #DIV/0! |
| Dync1i1 13426        | -1 | #DIV/0! | 1 | #DIV/0! |
| Nrk 27206            | -1 | #DIV/0! | 1 | #DIV/0! |
| Efhc2 74405          | -1 | #DIV/0! | 1 | #DIV/0! |
| 4932414N04Rik 75721  | -1 | #DIV/0! | 1 | #DIV/0! |
| Disc1 244667         | -1 | #DIV/0! | 1 | #DIV/0! |
| 1700001K23Rik 69319  | -1 | #DIV/0! | 1 | #DIV/0! |
| lpw 16353            | -1 | #DIV/0! | 1 | #DIV/0! |
| Acsm4 233801         | -1 | #DIV/0! | 1 | #DIV/0! |
| Mir879 100124492     | -1 | #DIV/0! | 1 | #DIV/0! |
| Gm11149 100036537    | -1 | #DIV/0! | 1 | #DIV/0! |
| Cntn6 53870          | -1 | #DIV/0! | 1 | #DIV/0! |
| Mir3086 100526480    | -1 | #DIV/0! | 1 | #DIV/0! |
| Olfr835 257872       | -1 | #DIV/0! | 1 | #DIV/0! |
| Gm12171 675689       | -1 | #DIV/0! | 1 | #DIV/0! |
| Defb36 266620        | -1 | #DIV/0! | 1 | #DIV/0! |
| Plcx3 239318         | -1 | #DIV/0! | 1 | #DIV/0! |
| A530053G22Rik 208079 | -1 | #DIV/0! | 1 | #DIV/0! |
| Lrrc34 71827         | -1 | #DIV/0! | 1 | #DIV/0! |
| Gm7173 636104        | -1 | #DIV/0! | 1 | #DIV/0! |
| Pgr15l 245526        | -1 | #DIV/0! | 1 | #DIV/0! |
| Pcdhb21 93892        | -1 | #DIV/0! | 1 | #DIV/0! |
| Siglec15 620235      | -1 | #DIV/0! | 1 | #DIV/0! |
| Olfr810 258543       | -1 | #DIV/0! | 1 | #DIV/0! |
| Olfr414 258756       | -1 | #DIV/0! | 1 | #DIV/0! |
| 9230104L09Rik 77705  | -1 | #DIV/0! | 1 | #DIV/0! |
| Vmn1r178 232959      | -1 | #DIV/0! | 1 | #DIV/0! |
| Slco1a6 28254        | -1 | #DIV/0! | 1 | #DIV/0! |
| BC049635 277773      | -1 | #DIV/0! | 1 | #DIV/0! |
| Crxos1 546024        | -1 | #DIV/0! | 1 | #DIV/0! |
| Olfr470 258417       | -1 | #DIV/0! | 1 | #DIV/0! |
| C030019I05Rik 320116 | -1 | #DIV/0! | 1 | #DIV/0! |
| Csta 209294          | -1 | #DIV/0! | 1 | #DIV/0! |
| Fam5b 240843         | -1 | #DIV/0! | 1 | #DIV/0! |
| Amtn 71421           | -1 | #DIV/0! | 1 | #DIV/0! |
| Lce1m 66203          | -1 | #DIV/0! | 1 | #DIV/0! |
| H2-M10.4 224753      | -1 | #DIV/0! | 1 | #DIV/0! |
| Dlx1as 111970        | -1 | #DIV/0! | 1 | #DIV/0! |
| Ubqlnl 244179        | -1 | #DIV/0! | 1 | #DIV/0! |
| Prss22 70835         | -1 | #DIV/0! | 1 | #DIV/0! |
| Vmn1r39 546903       | -1 | #DIV/0! | 1 | #DIV/0! |
| Dcaf12l2 245403      | -1 | #DIV/0! | 1 | #DIV/0! |
| Prop1 19127          | -1 | #DIV/0! | 1 | #DIV/0! |
| Olfr1118 404328      | -1 | #DIV/0! | 1 | #DIV/0! |
| Gm15292 100041787    | -1 | #DIV/0! | 1 | #DIV/0! |
| Chrnd 11447          | -1 | #DIV/0! | 1 | #DIV/0! |
| 4930443G12Rik 74686  | -1 | #DIV/0! | 1 | #DIV/0! |
| Olfr599 258726       | -1 | #DIV/0! | 1 | #DIV/0! |
| Rnu11 353373         | -1 | #DIV/0! | 1 | #DIV/0! |
| Cilp2 68709          | -1 | #DIV/0! | 1 | #DIV/0! |

|                      |    |         |   |         |
|----------------------|----|---------|---|---------|
| Rhcg 56315           | -1 | #DIV/0! | 1 | #DIV/0! |
| Gm1965 434065        | -1 | #DIV/0! | 1 | #DIV/0! |
| Vmn1r40 113855       | -1 | #DIV/0! | 1 | #DIV/0! |
| 2010106E10Rik 67715  | -1 | #DIV/0! | 1 | #DIV/0! |
| 1700109H08Rik 77036  | -1 | #DIV/0! | 1 | #DIV/0! |
| Gm9 194854           | -1 | #DIV/0! | 1 | #DIV/0! |
| Olfr566 258168       | -1 | #DIV/0! | 1 | #DIV/0! |
| Fabp9 21884          | -1 | #DIV/0! | 1 | #DIV/0! |
| Nxf3 245610          | -1 | #DIV/0! | 1 | #DIV/0! |
| Otx2os1 606497       | -1 | #DIV/0! | 1 | #DIV/0! |
| Rhox3c 100135654     | -1 | #DIV/0! | 1 | #DIV/0! |
| Gm4216 100043083     | -1 | #DIV/0! | 1 | #DIV/0! |
| Oog3 100012          | -1 | #DIV/0! | 1 | #DIV/0! |
| Capns2 69543         | -1 | #DIV/0! | 1 | #DIV/0! |
| Vmn1r235 171233      | -1 | #DIV/0! | 1 | #DIV/0! |
| Pdzd3 170761         | -1 | #DIV/0! | 1 | #DIV/0! |
| Skint10 230613       | -1 | #DIV/0! | 1 | #DIV/0! |
| Cacng2 12300         | -1 | #DIV/0! | 1 | #DIV/0! |
| Olfr677 258355       | -1 | #DIV/0! | 1 | #DIV/0! |
| Stmn1-rs1 111186     | -1 | #DIV/0! | 1 | #DIV/0! |
| Gm5797 545013        | -1 | #DIV/0! | 1 | #DIV/0! |
| Defb22 442835        | -1 | #DIV/0! | 1 | #DIV/0! |
| Olfr1350 258384      | -1 | #DIV/0! | 1 | #DIV/0! |
| 1700096J18Rik 67927  | -1 | #DIV/0! | 1 | #DIV/0! |
| Ocm 18261            | -1 | #DIV/0! | 1 | #DIV/0! |
| Tspan10 208634       | -1 | #DIV/0! | 1 | #DIV/0! |
| Slc18a3 20508        | -1 | #DIV/0! | 1 | #DIV/0! |
| Gipc2 54120          | -1 | #DIV/0! | 1 | #DIV/0! |
| Mir497 751537        | -1 | #DIV/0! | 1 | #DIV/0! |
| Rhox2h 622301        | -1 | #DIV/0! | 1 | #DIV/0! |
| Bpifb4 381399        | -1 | #DIV/0! | 1 | #DIV/0! |
| Olfr1212 258241      | -1 | #DIV/0! | 1 | #DIV/0! |
| Mstn 17700           | -1 | #DIV/0! | 1 | #DIV/0! |
| Skint6 230622        | -1 | #DIV/0! | 1 | #DIV/0! |
| Tlx1 21908           | -1 | #DIV/0! | 1 | #DIV/0! |
| Lcn14 383678         | -1 | #DIV/0! | 1 | #DIV/0! |
| Olfr639 259088       | -1 | #DIV/0! | 1 | #DIV/0! |
| Snord42b 100529077   | -1 | #DIV/0! | 1 | #DIV/0! |
| Figla 26910          | -1 | #DIV/0! | 1 | #DIV/0! |
| Vmn1r18 171199       | -1 | #DIV/0! | 1 | #DIV/0! |
| Mir694 751558        | -1 | #DIV/0! | 1 | #DIV/0! |
| Gpr113 381628        | -1 | #DIV/0! | 1 | #DIV/0! |
| Krtap6-1 16700       | -1 | #DIV/0! | 1 | #DIV/0! |
| Dleu7 239133         | -1 | #DIV/0! | 1 | #DIV/0! |
| Olfr1160 258643      | -1 | #DIV/0! | 1 | #DIV/0! |
| Spinlw1 75526        | -1 | #DIV/0! | 1 | #DIV/0! |
| Mir681 751538        | -1 | #DIV/0! | 1 | #DIV/0! |
| Sdr16c5 242285       | -1 | #DIV/0! | 1 | #DIV/0! |
| 4930467E23Rik 626415 | -1 | #DIV/0! | 1 | #DIV/0! |
| Gm11487 433719       | -1 | #DIV/0! | 1 | #DIV/0! |
| Olfr1313 258257      | -1 | #DIV/0! | 1 | #DIV/0! |
| Olfr1022 258582      | -1 | #DIV/0! | 1 | #DIV/0! |
| Trim38 214158        | -1 | #DIV/0! | 1 | #DIV/0! |

|                      |    |         |   |         |
|----------------------|----|---------|---|---------|
| 1700017D01Rik 69369  | -1 | #DIV/0! | 1 | #DIV/0! |
| Mrgprh 80978         | -1 | #DIV/0! | 1 | #DIV/0! |
| Olfr1002 258566      | -1 | #DIV/0! | 1 | #DIV/0! |
| Vipr2 22355          | -1 | #DIV/0! | 1 | #DIV/0! |
| Gm4763 210155        | -1 | #DIV/0! | 1 | #DIV/0! |
| Enpp7 238011         | -1 | #DIV/0! | 1 | #DIV/0! |
| Olfr722 258487       | -1 | #DIV/0! | 1 | #DIV/0! |
| Zscan4b 665780       | -1 | #DIV/0! | 1 | #DIV/0! |
| Bsnd 140475          | -1 | #DIV/0! | 1 | #DIV/0! |
| Foxn4 116810         | -1 | #DIV/0! | 1 | #DIV/0! |
| 4933406K04Rik 71033  | -1 | #DIV/0! | 1 | #DIV/0! |
| Vmn1r214 171248      | -1 | #DIV/0! | 1 | #DIV/0! |
| Pla2g2d 18782        | -1 | #DIV/0! | 1 | #DIV/0! |
| Cdcp2 242603         | -1 | #DIV/0! | 1 | #DIV/0! |
| Gm581 210541         | -1 | #DIV/0! | 1 | #DIV/0! |
| BC030500 234290      | -1 | #DIV/0! | 1 | #DIV/0! |
| Il17c 234836         | -1 | #DIV/0! | 1 | #DIV/0! |
| Cyp2c66 69888        | -1 | #DIV/0! | 1 | #DIV/0! |
| Vmn2r67 620672       | -1 | #DIV/0! | 1 | #DIV/0! |
| Smr2 20600           | -1 | #DIV/0! | 1 | #DIV/0! |
| Vmn1r184 100312477   | -1 | #DIV/0! | 1 | #DIV/0! |
| Il1rapl1 331461      | -1 | #DIV/0! | 1 | #DIV/0! |
| Mir758 791071        | -1 | #DIV/0! | 1 | #DIV/0! |
| Mir345 723946        | -1 | #DIV/0! | 1 | #DIV/0! |
| Mycbpap 104601       | -1 | #DIV/0! | 1 | #DIV/0! |
| Ifi202b 26388        | -1 | #DIV/0! | 1 | #DIV/0! |
| Dppa4 73693          | -1 | #DIV/0! | 1 | #DIV/0! |
| Tmem95 432576        | -1 | #DIV/0! | 1 | #DIV/0! |
| Tas2r122 630845      | -1 | #DIV/0! | 1 | #DIV/0! |
| Olfr372 404315       | -1 | #DIV/0! | 1 | #DIV/0! |
| Txndc6 623534        | -1 | #DIV/0! | 1 | #DIV/0! |
| Vmn2r108 627805      | -1 | #DIV/0! | 1 | #DIV/0! |
| Cox7b2 78174         | -1 | #DIV/0! | 1 | #DIV/0! |
| Gm6760 627470        | -1 | #DIV/0! | 1 | #DIV/0! |
| Olfr1124 259030      | -1 | #DIV/0! | 1 | #DIV/0! |
| Gm5916 546123        | -1 | #DIV/0! | 1 | #DIV/0! |
| Hbb-bh2 436003       | -1 | #DIV/0! | 1 | #DIV/0! |
| Gm6772 627607        | -1 | #DIV/0! | 1 | #DIV/0! |
| Nr0b1 11614          | -1 | #DIV/0! | 1 | #DIV/0! |
| Mir653 100124468     | -1 | #DIV/0! | 1 | #DIV/0! |
| Olfr371 258858       | -1 | #DIV/0! | 1 | #DIV/0! |
| Mir3075 100526533    | -1 | #DIV/0! | 1 | #DIV/0! |
| Chia 81600           | -1 | #DIV/0! | 1 | #DIV/0! |
| Fezf1 73191          | -1 | #DIV/0! | 1 | #DIV/0! |
| 9230115E21Rik 408028 | -1 | #DIV/0! | 1 | #DIV/0! |
| Gm7616 665389        | -1 | #DIV/0! | 1 | #DIV/0! |
| Atp1a4 27222         | -1 | #DIV/0! | 1 | #DIV/0! |
| Gm14483 100042922    | -1 | #DIV/0! | 1 | #DIV/0! |
| Gm6642 625995        | -1 | #DIV/0! | 1 | #DIV/0! |
| Cyp2j12 242546       | -1 | #DIV/0! | 1 | #DIV/0! |
| Skor1 207667         | -1 | #DIV/0! | 1 | #DIV/0! |
| Myh15 667772         | -1 | #DIV/0! | 1 | #DIV/0! |
| Snord8 100217445     | -1 | #DIV/0! | 1 | #DIV/0! |



|                      |    |         |   |         |
|----------------------|----|---------|---|---------|
| Capn8 170725         | -1 | #DIV/0! | 1 | #DIV/0! |
| Hist1h2ao 665433     | -1 | #DIV/0! | 1 | #DIV/0! |
| 1700129C05Rik 67932  | -1 | #DIV/0! | 1 | #DIV/0! |
| Fam3b 52793          | -1 | #DIV/0! | 1 | #DIV/0! |
| Tppp2 219038         | -1 | #DIV/0! | 1 | #DIV/0! |
| Dmbx1 140477         | -1 | #DIV/0! | 1 | #DIV/0! |
| Mir678 751554        | -1 | #DIV/0! | 1 | #DIV/0! |
| Gm5885 545884        | -1 | #DIV/0! | 1 | #DIV/0! |
| Slc9a2 226999        | -1 | #DIV/0! | 1 | #DIV/0! |
| Dlx5 13395           | -1 | #DIV/0! | 1 | #DIV/0! |
| C1ql3 227580         | -1 | #DIV/0! | 1 | #DIV/0! |
| Snord111 100217465   | -1 | #DIV/0! | 1 | #DIV/0! |
| Gm14354 74851        | -1 | #DIV/0! | 1 | #DIV/0! |
| Gm6086 619597        | -1 | #DIV/0! | 1 | #DIV/0! |
| Rhox3a 382209        | -1 | #DIV/0! | 1 | #DIV/0! |
| Mir1899 100316772    | -1 | #DIV/0! | 1 | #DIV/0! |
| 1700054O13Rik 67334  | -1 | #DIV/0! | 1 | #DIV/0! |
| Agbl4 78933          | -1 | #DIV/0! | 1 | #DIV/0! |
| Prima1 170952        | -1 | #DIV/0! | 1 | #DIV/0! |
| Mir92-2 723942       | -1 | #DIV/0! | 1 | #DIV/0! |
| Olfr1428 258673      | -1 | #DIV/0! | 1 | #DIV/0! |
| Klk7 23993           | -1 | #DIV/0! | 1 | #DIV/0! |
| Gm13280 230398       | -1 | #DIV/0! | 1 | #DIV/0! |
| Mir20b 723923        | -1 | #DIV/0! | 1 | #DIV/0! |
| Lyzl6 69444          | -1 | #DIV/0! | 1 | #DIV/0! |
| 4933409G03Rik 227998 | -1 | #DIV/0! | 1 | #DIV/0! |
| Vmn1r79 100042437    | -1 | #DIV/0! | 1 | #DIV/0! |
| Ssxb1 67985          | -1 | #DIV/0! | 1 | #DIV/0! |
| Odf3l2 382384        | -1 | #DIV/0! | 1 | #DIV/0! |
| Olfr133 258828       | -1 | #DIV/0! | 1 | #DIV/0! |
| Olfr1024 257900      | -1 | #DIV/0! | 1 | #DIV/0! |
| 1700001P01Rik 72215  | -1 | #DIV/0! | 1 | #DIV/0! |
| Paqr5 74090          | -1 | #DIV/0! | 1 | #DIV/0! |
| Cyp2b23 243881       | -1 | #DIV/0! | 1 | #DIV/0! |
| Chrna3 110834        | -1 | #DIV/0! | 1 | #DIV/0! |
| Gcg 14526            | -1 | #DIV/0! | 1 | #DIV/0! |
| Gm5934 546272        | -1 | #DIV/0! | 1 | #DIV/0! |
| Olfr1303 258397      | -1 | #DIV/0! | 1 | #DIV/0! |
| Gpr15 71223          | -1 | #DIV/0! | 1 | #DIV/0! |
| Tal2 21350           | -1 | #DIV/0! | 1 | #DIV/0! |
| Tctex1d1 67344       | -1 | #DIV/0! | 1 | #DIV/0! |
| Olfr191 258035       | -1 | #DIV/0! | 1 | #DIV/0! |
| Olfr598 257975       | -1 | #DIV/0! | 1 | #DIV/0! |
| Yipf7 75581          | -1 | #DIV/0! | 1 | #DIV/0! |
| Slc35f3 210027       | -1 | #DIV/0! | 1 | #DIV/0! |
| Msx3 17703           | -1 | #DIV/0! | 1 | #DIV/0! |
| Olfr378 259026       | -1 | #DIV/0! | 1 | #DIV/0! |
| Myb 17863            | -1 | #DIV/0! | 1 | #DIV/0! |
| Npc1l1 237636        | -1 | #DIV/0! | 1 | #DIV/0! |
| Olfr1180 258920      | -1 | #DIV/0! | 1 | #DIV/0! |
| Klk1b3 18050         | -1 | #DIV/0! | 1 | #DIV/0! |
| Rhox3f 621852        | -1 | #DIV/0! | 1 | #DIV/0! |
| Colq 382864          | -1 | #DIV/0! | 1 | #DIV/0! |

|                      |    |         |   |         |
|----------------------|----|---------|---|---------|
| Nphs1as 445267       | -1 | #DIV/0! | 1 | #DIV/0! |
| Olfr802 258934       | -1 | #DIV/0! | 1 | #DIV/0! |
| Mir29b-2 723963      | -1 | #DIV/0! | 1 | #DIV/0! |
| Olfr494 258732       | -1 | #DIV/0! | 1 | #DIV/0! |
| Fam123c 211383       | -1 | #DIV/0! | 1 | #DIV/0! |
| Zpld1 239852         | -1 | #DIV/0! | 1 | #DIV/0! |
| Spag16 66722         | -1 | #DIV/0! | 1 | #DIV/0! |
| Tex101 56746         | -1 | #DIV/0! | 1 | #DIV/0! |
| Frem2 242022         | -1 | #DIV/0! | 1 | #DIV/0! |
| Olfr994 258425       | -1 | #DIV/0! | 1 | #DIV/0! |
| Olfr1098 258842      | -1 | #DIV/0! | 1 | #DIV/0! |
| Olfr1026 258577      | -1 | #DIV/0! | 1 | #DIV/0! |
| Ceacam9 26368        | -1 | #DIV/0! | 1 | #DIV/0! |
| Gm5087 328354        | -1 | #DIV/0! | 1 | #DIV/0! |
| Slc47a2 380701       | -1 | #DIV/0! | 1 | #DIV/0! |
| Gm3286 100041354     | -1 | #DIV/0! | 1 | #DIV/0! |
| Amy2a4 100043684     | -1 | #DIV/0! | 1 | #DIV/0! |
| Rgs13 246709         | -1 | #DIV/0! | 1 | #DIV/0! |
| Ctsq 104002          | -1 | #DIV/0! | 1 | #DIV/0! |
| Neurog1 18014        | -1 | #DIV/0! | 1 | #DIV/0! |
| Olfr291 258410       | -1 | #DIV/0! | 1 | #DIV/0! |
| D630042F21Rik 330428 | -1 | #DIV/0! | 1 | #DIV/0! |
| Mir3097 100526557    | -1 | #DIV/0! | 1 | #DIV/0! |
| Vmn2r54 666085       | -1 | #DIV/0! | 1 | #DIV/0! |
| Mir300 723833        | -1 | #DIV/0! | 1 | #DIV/0! |
| Foxd1 15229          | -1 | #DIV/0! | 1 | #DIV/0! |
| Defa20 68009         | -1 | #DIV/0! | 1 | #DIV/0! |
| Olfr720 258387       | -1 | #DIV/0! | 1 | #DIV/0! |
| Vax1 22326           | -1 | #DIV/0! | 1 | #DIV/0! |
| Pnmt 18948           | -1 | #DIV/0! | 1 | #DIV/0! |
| Trim67 330863        | -1 | #DIV/0! | 1 | #DIV/0! |
| Tub 22141            | -1 | #DIV/0! | 1 | #DIV/0! |
| Pgk2 18663           | -1 | #DIV/0! | 1 | #DIV/0! |
| Prss29 114662        | -1 | #DIV/0! | 1 | #DIV/0! |
| Vmn2r-ps11 319210    | -1 | #DIV/0! | 1 | #DIV/0! |
| Olfr1163 258638      | -1 | #DIV/0! | 1 | #DIV/0! |
| Olfr1057 404325      | -1 | #DIV/0! | 1 | #DIV/0! |
| Speer3 71026         | -1 | #DIV/0! | 1 | #DIV/0! |
| Tubb3 22152          | -1 | #DIV/0! | 1 | #DIV/0! |
| Snord11 100217421    | -1 | #DIV/0! | 1 | #DIV/0! |
| Vmn1r25 113865       | -1 | #DIV/0! | 1 | #DIV/0! |
| Vmn1r149 100043051   | -1 | #DIV/0! | 1 | #DIV/0! |
| Olfr194 433031       | -1 | #DIV/0! | 1 | #DIV/0! |
| 4932415M13Rik 211496 | -1 | #DIV/0! | 1 | #DIV/0! |
| Gpbar1 227289        | -1 | #DIV/0! | 1 | #DIV/0! |
| Vmn1r7 434016        | -1 | #DIV/0! | 1 | #DIV/0! |
| Myo1a 432516         | -1 | #DIV/0! | 1 | #DIV/0! |
| Vmn1r204 632793      | -1 | #DIV/0! | 1 | #DIV/0! |
| Lce1c 73719          | -1 | #DIV/0! | 1 | #DIV/0! |
| Vmn2r120 224916      | -1 | #DIV/0! | 1 | #DIV/0! |
| Cpne6 12891          | -1 | #DIV/0! | 1 | #DIV/0! |
| Rtp1 239766          | -1 | #DIV/0! | 1 | #DIV/0! |
| Zic3 22773           | -1 | #DIV/0! | 1 | #DIV/0! |

|                      |    |         |   |         |
|----------------------|----|---------|---|---------|
| Olf103 258830        | -1 | #DIV/0! | 1 | #DIV/0! |
| BC051070 229688      | -1 | #DIV/0! | 1 | #DIV/0! |
| Olf1497 258736       | -1 | #DIV/0! | 1 | #DIV/0! |
| Mir363 723852        | -1 | #DIV/0! | 1 | #DIV/0! |
| Vmn1r15 113863       | -1 | #DIV/0! | 1 | #DIV/0! |
| Vmn1r201 171255      | -1 | #DIV/0! | 1 | #DIV/0! |
| Olf95 258506         | -1 | #DIV/0! | 1 | #DIV/0! |
| Il31 76399           | -1 | #DIV/0! | 1 | #DIV/0! |
| Cyp2w1 545817        | -1 | #DIV/0! | 1 | #DIV/0! |
| Pde11a 241489        | -1 | #DIV/0! | 1 | #DIV/0! |
| Olf937 258431        | -1 | #DIV/0! | 1 | #DIV/0! |
| Mir196a-1 387191     | -1 | #DIV/0! | 1 | #DIV/0! |
| Gm5591 434171        | -1 | #DIV/0! | 1 | #DIV/0! |
| Klk13 626834         | -1 | #DIV/0! | 1 | #DIV/0! |
| 1700016C15Rik 69428  | -1 | #DIV/0! | 1 | #DIV/0! |
| Arx 11878            | -1 | #DIV/0! | 1 | #DIV/0! |
| Slc22a16 70840       | -1 | #DIV/0! | 1 | #DIV/0! |
| Vmn1r233 171236      | -1 | #DIV/0! | 1 | #DIV/0! |
| Ntn5 243967          | -1 | #DIV/0! | 1 | #DIV/0! |
| BC049730 232972      | -1 | #DIV/0! | 1 | #DIV/0! |
| Cacna2d2 56808       | -1 | #DIV/0! | 1 | #DIV/0! |
| Tlx3 27140           | -1 | #DIV/0! | 1 | #DIV/0! |
| Mir374c 100526513    | -1 | #DIV/0! | 1 | #DIV/0! |
| Olf1270 258987       | -1 | #DIV/0! | 1 | #DIV/0! |
| Olf963 258087        | -1 | #DIV/0! | 1 | #DIV/0! |
| Olf1222 258177       | -1 | #DIV/0! | 1 | #DIV/0! |
| 4931440L10Rik 71001  | -1 | #DIV/0! | 1 | #DIV/0! |
| Try5 103964          | -1 | #DIV/0! | 1 | #DIV/0! |
| Olf220 546747        | -1 | #DIV/0! | 1 | #DIV/0! |
| Defb41 77673         | -1 | #DIV/0! | 1 | #DIV/0! |
| Olf572 259093        | -1 | #DIV/0! | 1 | #DIV/0! |
| Mir875 100124469     | -1 | #DIV/0! | 1 | #DIV/0! |
| Pou5f1 18999         | -1 | #DIV/0! | 1 | #DIV/0! |
| Lpcat2b 70902        | -1 | #DIV/0! | 1 | #DIV/0! |
| 4933421I07Rik 71162  | -1 | #DIV/0! | 1 | #DIV/0! |
| 5430402E10Rik 71351  | -1 | #DIV/0! | 1 | #DIV/0! |
| Ccdc103 73293        | -1 | #DIV/0! | 1 | #DIV/0! |
| Tbc1d21 74286        | -1 | #DIV/0! | 1 | #DIV/0! |
| Spata21 329972       | -1 | #DIV/0! | 1 | #DIV/0! |
| 4930519F16Rik 75106  | -1 | #DIV/0! | 1 | #DIV/0! |
| Pramel5 384077       | -1 | #DIV/0! | 1 | #DIV/0! |
| Mir412 723913        | -1 | #DIV/0! | 1 | #DIV/0! |
| Lingo3 237403        | -1 | #DIV/0! | 1 | #DIV/0! |
| Olf167 258937        | -1 | #DIV/0! | 1 | #DIV/0! |
| Mir3471-1 100499521  | -1 | #DIV/0! | 1 | #DIV/0! |
| Ces2f 71903          | -1 | #DIV/0! | 1 | #DIV/0! |
| Ido1 15930           | -1 | #DIV/0! | 1 | #DIV/0! |
| 1700015F17Rik 381716 | -1 | #DIV/0! | 1 | #DIV/0! |
| Mir154 387172        | -1 | #DIV/0! | 1 | #DIV/0! |
| Adm2 223780          | -1 | #DIV/0! | 1 | #DIV/0! |
| Mir330 724063        | -1 | #DIV/0! | 1 | #DIV/0! |
| Padi3 18601          | -1 | #DIV/0! | 1 | #DIV/0! |
| Pcdha12 192164       | -1 | #DIV/0! | 1 | #DIV/0! |

|                     |    |         |   |         |
|---------------------|----|---------|---|---------|
| Mir705 735267       | -1 | #DIV/0! | 1 | #DIV/0! |
| Olfr1465 258121     | -1 | #DIV/0! | 1 | #DIV/0! |
| Mir3072 100499517   | -1 | #DIV/0! | 1 | #DIV/0! |
| Ifnab 15974         | -1 | #DIV/0! | 1 | #DIV/0! |
| Myoc 17926          | -1 | #DIV/0! | 1 | #DIV/0! |
| Mir27b 387221       | -1 | #DIV/0! | 1 | #DIV/0! |
| Htr1b 15551         | -1 | #DIV/0! | 1 | #DIV/0! |
| Skint1 639781       | -1 | #DIV/0! | 1 | #DIV/0! |
| Dmrtc2 71241        | -1 | #DIV/0! | 1 | #DIV/0! |
| Mir1968 100316713   | -1 | #DIV/0! | 1 | #DIV/0! |
| Tmprss5 80893       | -1 | #DIV/0! | 1 | #DIV/0! |
| Mir344e 100526541   | -1 | #DIV/0! | 1 | #DIV/0! |
| Cts8-ps 116911      | -1 | #DIV/0! | 1 | #DIV/0! |
| Olfr452 258207      | -1 | #DIV/0! | 1 | #DIV/0! |
| Tmem90b 433485      | -1 | #DIV/0! | 1 | #DIV/0! |
| 4933406F09Rik 68308 | -1 | #DIV/0! | 1 | #DIV/0! |
| Dyrk4 101320        | -1 | #DIV/0! | 1 | #DIV/0! |
| BC089491 280621     | -1 | #DIV/0! | 1 | #DIV/0! |
| Prss40 21756        | -1 | #DIV/0! | 1 | #DIV/0! |
| Mir667 751552       | -1 | #DIV/0! | 1 | #DIV/0! |
| Olfr419 258710      | -1 | #DIV/0! | 1 | #DIV/0! |
| Mir682 751556       | -1 | #DIV/0! | 1 | #DIV/0! |
| Arhgap36 75404      | -1 | #DIV/0! | 1 | #DIV/0! |
| Mei4 75033          | -1 | #DIV/0! | 1 | #DIV/0! |
| Olfr1286 277562     | -1 | #DIV/0! | 1 | #DIV/0! |
| Olfr947-ps1 257924  | -1 | #DIV/0! | 1 | #DIV/0! |
| Mir302a 723920      | -1 | #DIV/0! | 1 | #DIV/0! |
| Rs1 20147           | -1 | #DIV/0! | 1 | #DIV/0! |
| Mab21l3 242125      | -1 | #DIV/0! | 1 | #DIV/0! |
| Alox8 11688         | -1 | #DIV/0! | 1 | #DIV/0! |
| Sox30 214105        | -1 | #DIV/0! | 1 | #DIV/0! |
| Ptprv 13924         | -1 | #DIV/0! | 1 | #DIV/0! |
| Vmn2r48 625580      | -1 | #DIV/0! | 1 | #DIV/0! |
| Gm12298 100038666   | -1 | #DIV/0! | 1 | #DIV/0! |
| Mir380 723859       | -1 | #DIV/0! | 1 | #DIV/0! |
| 1700008A04Rik 69351 | -1 | #DIV/0! | 1 | #DIV/0! |
| Vmn2r16 384220      | -1 | #DIV/0! | 1 | #DIV/0! |
| Gstt4 75886         | -1 | #DIV/0! | 1 | #DIV/0! |
| Olfr908 258872      | -1 | #DIV/0! | 1 | #DIV/0! |
| Pcdha2 353234       | -1 | #DIV/0! | 1 | #DIV/0! |
| 2010001E11Rik 72045 | -1 | #DIV/0! | 1 | #DIV/0! |
| Patl2 67578         | -1 | #DIV/0! | 1 | #DIV/0! |
| Prss33 353130       | -1 | #DIV/0! | 1 | #DIV/0! |
| Chat 12647          | -1 | #DIV/0! | 1 | #DIV/0! |
| Strc 140476         | -1 | #DIV/0! | 1 | #DIV/0! |
| Pcdha10 12943       | -1 | #DIV/0! | 1 | #DIV/0! |
| Olfr559 259116      | -1 | #DIV/0! | 1 | #DIV/0! |
| Crygc 12966         | -1 | #DIV/0! | 1 | #DIV/0! |
| Cdh18 320865        | -1 | #DIV/0! | 1 | #DIV/0! |
| Scnn1g 20278        | -1 | #DIV/0! | 1 | #DIV/0! |
| Gm8267 666744       | -1 | #DIV/0! | 1 | #DIV/0! |
| Nanos3 244551       | -1 | #DIV/0! | 1 | #DIV/0! |
| Kcnk12 210741       | -1 | #DIV/0! | 1 | #DIV/0! |

|                     |    |         |   |         |
|---------------------|----|---------|---|---------|
| Cpa6 329093         | -1 | #DIV/0! | 1 | #DIV/0! |
| Fmo9 240894         | -1 | #DIV/0! | 1 | #DIV/0! |
| Vmn2r-ps129 665976  | -1 | #DIV/0! | 1 | #DIV/0! |
| Rfpl4b 215919       | -1 | #DIV/0! | 1 | #DIV/0! |
| 1700012B09Rik 69325 | -1 | #DIV/0! | 1 | #DIV/0! |
| 1700123L14Rik 78482 | -1 | #DIV/0! | 1 | #DIV/0! |
| Fam92b 436062       | -1 | #DIV/0! | 1 | #DIV/0! |
| Ins2 16334          | -1 | #DIV/0! | 1 | #DIV/0! |
| Nek11 208583        | -1 | #DIV/0! | 1 | #DIV/0! |
| Gm6985 629581       | -1 | #DIV/0! | 1 | #DIV/0! |
| 4930458L03Rik 78124 | -1 | #DIV/0! | 1 | #DIV/0! |
| Olfr748 258113      | -1 | #DIV/0! | 1 | #DIV/0! |
| Olfr781 258723      | -1 | #DIV/0! | 1 | #DIV/0! |
| Olfr481 258927      | -1 | #DIV/0! | 1 | #DIV/0! |
| Fabp12 75497        | -1 | #DIV/0! | 1 | #DIV/0! |
| Psg21 72242         | -1 | #DIV/0! | 1 | #DIV/0! |
| Mir23b 387217       | -1 | #DIV/0! | 1 | #DIV/0! |
| Muc20 224116        | -1 | #DIV/0! | 1 | #DIV/0! |
| Snora35 100303736   | -1 | #DIV/0! | 1 | #DIV/0! |
| Mybphl 68753        | -1 | #DIV/0! | 1 | #DIV/0! |
| Fam43b 625638       | -1 | #DIV/0! | 1 | #DIV/0! |
| Vmn1r31 626828      | -1 | #DIV/0! | 1 | #DIV/0! |
| Ly6h 23934          | -1 | #DIV/0! | 1 | #DIV/0! |
| Olfr201 258996      | -1 | #DIV/0! | 1 | #DIV/0! |
| Kdm5d 20592         | -1 | #DIV/0! | 1 | #DIV/0! |
| Adamts8 30806       | -1 | #DIV/0! | 1 | #DIV/0! |
| Grm5 108071         | -1 | #DIV/0! | 1 | #DIV/0! |
| Vmn1r23 171197      | -1 | #DIV/0! | 1 | #DIV/0! |
| Fam122c 73866       | -1 | #DIV/0! | 1 | #DIV/0! |
| Fam115e 403088      | -1 | #DIV/0! | 1 | #DIV/0! |
| Olfr1179 258919     | -1 | #DIV/0! | 1 | #DIV/0! |
| Dsg1a 13510         | -1 | #DIV/0! | 1 | #DIV/0! |
| 4930571K23Rik 75861 | -1 | #DIV/0! | 1 | #DIV/0! |
| Olfr1134 259032     | -1 | #DIV/0! | 1 | #DIV/0! |
| Otx2 18424          | -1 | #DIV/0! | 1 | #DIV/0! |
| Olfr1373 211472     | -1 | #DIV/0! | 1 | #DIV/0! |
| Sowahd 245381       | -1 | #DIV/0! | 1 | #DIV/0! |
| Htr2a 15558         | -1 | #DIV/0! | 1 | #DIV/0! |
| Klra21 93968        | -1 | #DIV/0! | 1 | #DIV/0! |
| Chrne 11448         | -1 | #DIV/0! | 1 | #DIV/0! |
| Lyzl4 69032         | -1 | #DIV/0! | 1 | #DIV/0! |
| Mir680-2 751551     | -1 | #DIV/0! | 1 | #DIV/0! |
| Rhox9 104384        | -1 | #DIV/0! | 1 | #DIV/0! |
| Tnfsf8 21949        | -1 | #DIV/0! | 1 | #DIV/0! |
| Tex19.2 70956       | -1 | #DIV/0! | 1 | #DIV/0! |
| 3830403N18Rik 70691 | -1 | #DIV/0! | 1 | #DIV/0! |
| Tll2 24087          | -1 | #DIV/0! | 1 | #DIV/0! |
| Myocd 214384        | -1 | #DIV/0! | 1 | #DIV/0! |
| Vmn2r21 546912      | -1 | #DIV/0! | 1 | #DIV/0! |
| Trpd52l3 66745      | -1 | #DIV/0! | 1 | #DIV/0! |
| Krtap20-2 622935    | -1 | #DIV/0! | 1 | #DIV/0! |
| Olfr118 404308      | -1 | #DIV/0! | 1 | #DIV/0! |
| Csn2 12991          | -1 | #DIV/0! | 1 | #DIV/0! |

|                     |    |         |   |         |
|---------------------|----|---------|---|---------|
| St6galnac1 20445    | -1 | #DIV/0! | 1 | #DIV/0! |
| Sstr4 20608         | -1 | #DIV/0! | 1 | #DIV/0! |
| Trpa1 277328        | -1 | #DIV/0! | 1 | #DIV/0! |
| Kera 16545          | -1 | #DIV/0! | 1 | #DIV/0! |
| Olfr1256 258985     | -1 | #DIV/0! | 1 | #DIV/0! |
| Kis2 751866         | -1 | #DIV/0! | 1 | #DIV/0! |
| 2310002L13Rik 75577 | -1 | #DIV/0! | 1 | #DIV/0! |
| Mir1190 100316805   | -1 | #DIV/0! | 1 | #DIV/0! |
| Cpxcr1 382239       | -1 | #DIV/0! | 1 | #DIV/0! |
| Il24 93672          | -1 | #DIV/0! | 1 | #DIV/0! |
| Sbp 20234           | -1 | #DIV/0! | 1 | #DIV/0! |
| Tnfsf11 21943       | -1 | #DIV/0! | 1 | #DIV/0! |
| Olfr132 257889      | -1 | #DIV/0! | 1 | #DIV/0! |
| 4930522H14Rik 67646 | -1 | #DIV/0! | 1 | #DIV/0! |
| Speer4b 73526       | -1 | #DIV/0! | 1 | #DIV/0! |
| 4932438H23Rik 74387 | -1 | #DIV/0! | 1 | #DIV/0! |
| Shbg 20415          | -1 | #DIV/0! | 1 | #DIV/0! |
| Snora41 100217464   | -1 | #DIV/0! | 1 | #DIV/0! |
| Cacng8 81905        | -1 | #DIV/0! | 1 | #DIV/0! |
| Prl2c2 18811        | -1 | #DIV/0! | 1 | #DIV/0! |
| Olfr1310 258441     | -1 | #DIV/0! | 1 | #DIV/0! |
| Olfr1259 258338     | -1 | #DIV/0! | 1 | #DIV/0! |
| Gm6121 619991       | -1 | #DIV/0! | 1 | #DIV/0! |
| Tcp10c 100041352    | -1 | #DIV/0! | 1 | #DIV/0! |
| Gm2863 100040606    | -1 | #DIV/0! | 1 | #DIV/0! |
| V1rg10 171266       | -1 | #DIV/0! | 1 | #DIV/0! |
| Opn4 30044          | -1 | #DIV/0! | 1 | #DIV/0! |
| Npy5r 18168         | -1 | #DIV/0! | 1 | #DIV/0! |
| Olfr796 258933      | -1 | #DIV/0! | 1 | #DIV/0! |
| Ubl4b 67591         | -1 | #DIV/0! | 1 | #DIV/0! |
| Lrrtm3 216028       | -1 | #DIV/0! | 1 | #DIV/0! |
| Zfp534 100043100    | -1 | #DIV/0! | 1 | #DIV/0! |
| Dao 13142           | -1 | #DIV/0! | 1 | #DIV/0! |
| 6530411M01Rik 67791 | -1 | #DIV/0! | 1 | #DIV/0! |
| Gm17660 100271704   | -1 | #DIV/0! | 1 | #DIV/0! |
| Olfr768 258863      | -1 | #DIV/0! | 1 | #DIV/0! |
| Krt86 16679         | -1 | #DIV/0! | 1 | #DIV/0! |
| Mir764 791081       | -1 | #DIV/0! | 1 | #DIV/0! |
| Snord22 100127111   | -1 | #DIV/0! | 1 | #DIV/0! |
| Ccdc13 434446       | -1 | #DIV/0! | 1 | #DIV/0! |
| Defb2 13215         | -1 | #DIV/0! | 1 | #DIV/0! |
| Elf5 13711          | -1 | #DIV/0! | 1 | #DIV/0! |
| Padi1 18599         | -1 | #DIV/0! | 1 | #DIV/0! |
| Lce1l 73730         | -1 | #DIV/0! | 1 | #DIV/0! |
| Klf14 619665        | -1 | #DIV/0! | 1 | #DIV/0! |
| Mageb18 215641      | -1 | #DIV/0! | 1 | #DIV/0! |
| Crtac1 72832        | -1 | #DIV/0! | 1 | #DIV/0! |
| Lce1i 76585         | -1 | #DIV/0! | 1 | #DIV/0! |
| Rhox2b 100039913    | -1 | #DIV/0! | 1 | #DIV/0! |
| Ccdc42 276920       | -1 | #DIV/0! | 1 | #DIV/0! |
| 4921504E06Rik 70909 | -1 | #DIV/0! | 1 | #DIV/0! |
| Dnajb8 56691        | -1 | #DIV/0! | 1 | #DIV/0! |
| Mir669i 100316668   | -1 | #DIV/0! | 1 | #DIV/0! |

|                      |    |         |   |         |
|----------------------|----|---------|---|---------|
| 1700020N01Rik 67692  | -1 | #DIV/0! | 1 | #DIV/0! |
| Gm4301 100043224     | -1 | #DIV/0! | 1 | #DIV/0! |
| Il1f10 215274        | -1 | #DIV/0! | 1 | #DIV/0! |
| Epha6 13840          | -1 | #DIV/0! | 1 | #DIV/0! |
| Olfr1209 258453      | -1 | #DIV/0! | 1 | #DIV/0! |
| Csn1s2b 12992        | -1 | #DIV/0! | 1 | #DIV/0! |
| Mirlet7d 387247      | -1 | #DIV/0! | 1 | #DIV/0! |
| Olfr1441 258678      | -1 | #DIV/0! | 1 | #DIV/0! |
| Atp12a 192113        | -1 | #DIV/0! | 1 | #DIV/0! |
| Snord49b 100217426   | -1 | #DIV/0! | 1 | #DIV/0! |
| Usp44 327799         | -1 | #DIV/0! | 1 | #DIV/0! |
| Otor 57329           | -1 | #DIV/0! | 1 | #DIV/0! |
| Sox2 20674           | -1 | #DIV/0! | 1 | #DIV/0! |
| Tacr1 21336          | -1 | #DIV/0! | 1 | #DIV/0! |
| Chrm3 12671          | -1 | #DIV/0! | 1 | #DIV/0! |
| Olfr1385 258027      | -1 | #DIV/0! | 1 | #DIV/0! |
| 1700111N16Rik 74305  | -1 | #DIV/0! | 1 | #DIV/0! |
| Gm5647 434881        | -1 | #DIV/0! | 1 | #DIV/0! |
| Mir141 387159        | -1 | #DIV/0! | 1 | #DIV/0! |
| Mir542 723901        | -1 | #DIV/0! | 1 | #DIV/0! |
| Slc16a4 229699       | -1 | #DIV/0! | 1 | #DIV/0! |
| Gm10436 100039315    | -1 | #DIV/0! | 1 | #DIV/0! |
| Vmn1r93 404290       | -1 | #DIV/0! | 1 | #DIV/0! |
| 1700073E17Rik 381827 | -1 | #DIV/0! | 1 | #DIV/0! |
| Klk14 317653         | -1 | #DIV/0! | 1 | #DIV/0! |
| Spata4 69281         | -1 | #DIV/0! | 1 | #DIV/0! |
| Cnfn 72383           | -1 | #DIV/0! | 1 | #DIV/0! |
| Gm2022 100039052     | -1 | #DIV/0! | 1 | #DIV/0! |
| Mep1a 17287          | -1 | #DIV/0! | 1 | #DIV/0! |
| Tmem132b 208151      | -1 | #DIV/0! | 1 | #DIV/0! |
| Trim30e-ps1 625321   | -1 | #DIV/0! | 1 | #DIV/0! |
| Mir33 723897         | -1 | #DIV/0! | 1 | #DIV/0! |
| Mir344-2 100124439   | -1 | #DIV/0! | 1 | #DIV/0! |
| Gm7444 665005        | -1 | #DIV/0! | 1 | #DIV/0! |
| Snord2 100216532     | -1 | #DIV/0! | 1 | #DIV/0! |
| Rdh12 77974          | -1 | #DIV/0! | 1 | #DIV/0! |
| Olfr1352 259074      | -1 | #DIV/0! | 1 | #DIV/0! |
| Gm10466 100038617    | -1 | #DIV/0! | 1 | #DIV/0! |
| Hoxd11 15431         | -1 | #DIV/0! | 1 | #DIV/0! |
| Hoxc12 15421         | -1 | #DIV/0! | 1 | #DIV/0! |
| Snora5c 100217467    | -1 | #DIV/0! | 1 | #DIV/0! |
| Kcnmb2 72413         | -1 | #DIV/0! | 1 | #DIV/0! |
| Ndst4 64580          | -1 | #DIV/0! | 1 | #DIV/0! |
| Vit 74199            | -1 | #DIV/0! | 1 | #DIV/0! |
| Olfr917 258183       | -1 | #DIV/0! | 1 | #DIV/0! |
| Lim2 233187          | -1 | #DIV/0! | 1 | #DIV/0! |
| Bhlha9 320522        | -1 | #DIV/0! | 1 | #DIV/0! |
| Prl7c1 67505         | -1 | #DIV/0! | 1 | #DIV/0! |
| Zcchc18 66995        | -1 | #DIV/0! | 1 | #DIV/0! |
| Olfr1281 257979      | -1 | #DIV/0! | 1 | #DIV/0! |
| Ptpn20 19256         | -1 | #DIV/0! | 1 | #DIV/0! |
| Olfr1102 228228      | -1 | #DIV/0! | 1 | #DIV/0! |
| Olfm4 380924         | -1 | #DIV/0! | 1 | #DIV/0! |

|                      |    |         |   |         |
|----------------------|----|---------|---|---------|
| Ripply2 382089       | -1 | #DIV/0! | 1 | #DIV/0! |
| Olfr782 257985       | -1 | #DIV/0! | 1 | #DIV/0! |
| Slc9a10 208169       | -1 | #DIV/0! | 1 | #DIV/0! |
| 1700023E05Rik 71868  | -1 | #DIV/0! | 1 | #DIV/0! |
| Mir3112 100526514    | -1 | #DIV/0! | 1 | #DIV/0! |
| Gm3434 100041618     | -1 | #DIV/0! | 1 | #DIV/0! |
| Clca5 229933         | -1 | #DIV/0! | 1 | #DIV/0! |
| Krtap8-2 16704       | -1 | #DIV/0! | 1 | #DIV/0! |
| Vmn1r115 667273      | -1 | #DIV/0! | 1 | #DIV/0! |
| BC048679 210321      | -1 | #DIV/0! | 1 | #DIV/0! |
| Olfr1386 257888      | -1 | #DIV/0! | 1 | #DIV/0! |
| Btnl3 100038862      | -1 | #DIV/0! | 1 | #DIV/0! |
| Ptchd1 211612        | -1 | #DIV/0! | 1 | #DIV/0! |
| Gk2 14626            | -1 | #DIV/0! | 1 | #DIV/0! |
| Olfr706 258350       | -1 | #DIV/0! | 1 | #DIV/0! |
| Snord57 100217428    | -1 | #DIV/0! | 1 | #DIV/0! |
| Ankrd7 75196         | -1 | #DIV/0! | 1 | #DIV/0! |
| Gm9731 732482        | -1 | #DIV/0! | 1 | #DIV/0! |
| C130026I21Rik 620078 | -1 | #DIV/0! | 1 | #DIV/0! |
| Sox14 20669          | -1 | #DIV/0! | 1 | #DIV/0! |
| Scarna2 100217438    | -1 | #DIV/0! | 1 | #DIV/0! |
| Poln 272158          | -1 | #DIV/0! | 1 | #DIV/0! |
| Cyp11a1 13070        | -1 | #DIV/0! | 1 | #DIV/0! |
| Ndp 17986            | -1 | #DIV/0! | 1 | #DIV/0! |
| Gm3020 100040880     | -1 | #DIV/0! | 1 | #DIV/0! |
| Zic2 22772           | -1 | #DIV/0! | 1 | #DIV/0! |
| Ctla4 12477          | -1 | #DIV/0! | 1 | #DIV/0! |
| Rpl10l 238217        | -1 | #DIV/0! | 1 | #DIV/0! |
| Cpne9 211232         | -1 | #DIV/0! | 1 | #DIV/0! |
| Gm10536 100038410    | -1 | #DIV/0! | 1 | #DIV/0! |
| H2-M10.6 399549      | -1 | #DIV/0! | 1 | #DIV/0! |
| Mrgprb5 404239       | -1 | #DIV/0! | 1 | #DIV/0! |
| Nav3 260315          | -1 | #DIV/0! | 1 | #DIV/0! |
| Psors1c2 57390       | -1 | #DIV/0! | 1 | #DIV/0! |
| Mir196b 723820       | -1 | #DIV/0! | 1 | #DIV/0! |
| Gm4312 100043247     | -1 | #DIV/0! | 1 | #DIV/0! |
| Lhfpl3 269629        | -1 | #DIV/0! | 1 | #DIV/0! |
| 4930567H12Rik 75930  | -1 | #DIV/0! | 1 | #DIV/0! |
| Vmn1r78 171242       | -1 | #DIV/0! | 1 | #DIV/0! |
| Dgkk 331374          | -1 | #DIV/0! | 1 | #DIV/0! |
| 4930548H24Rik 67656  | -1 | #DIV/0! | 1 | #DIV/0! |
| Grem1 23892          | -1 | #DIV/0! | 1 | #DIV/0! |
| Olfr1419 257938      | -1 | #DIV/0! | 1 | #DIV/0! |
| Olfr331 258179       | -1 | #DIV/0! | 1 | #DIV/0! |
| Olfr376 258924       | -1 | #DIV/0! | 1 | #DIV/0! |
| Nrg3 18183           | -1 | #DIV/0! | 1 | #DIV/0! |
| Cd109 235505         | -1 | #DIV/0! | 1 | #DIV/0! |
| Mir770 791079        | -1 | #DIV/0! | 1 | #DIV/0! |
| Gm13109 329984       | -1 | #DIV/0! | 1 | #DIV/0! |
| Mir1952 100316816    | -1 | #DIV/0! | 1 | #DIV/0! |
| Olfr1406 258758      | -1 | #DIV/0! | 1 | #DIV/0! |
| Fgf2 14173           | -1 | #DIV/0! | 1 | #DIV/0! |
| Pcsk2 18549          | -1 | #DIV/0! | 1 | #DIV/0! |



|                      |    |         |   |         |
|----------------------|----|---------|---|---------|
| Vmn1r223 100036518   | -1 | #DIV/0! | 1 | #DIV/0! |
| Olfr1272 258982      | -1 | #DIV/0! | 1 | #DIV/0! |
| 1700018C11Rik 75524  | -1 | #DIV/0! | 1 | #DIV/0! |
| Cyp2j13 230459       | -1 | #DIV/0! | 1 | #DIV/0! |
| Gm156 232415         | -1 | #DIV/0! | 1 | #DIV/0! |
| Zp2 22787            | -1 | #DIV/0! | 1 | #DIV/0! |
| Mir1938 100316693    | -1 | #DIV/0! | 1 | #DIV/0! |
| Vmn2r116 619697      | -1 | #DIV/0! | 1 | #DIV/0! |
| Gm5129 332993        | -1 | #DIV/0! | 1 | #DIV/0! |
| Atp2c2 69047         | -1 | #DIV/0! | 1 | #DIV/0! |
| Vmn1r229 171224      | -1 | #DIV/0! | 1 | #DIV/0! |
| Olfr77 258336        | -1 | #DIV/0! | 1 | #DIV/0! |
| Gm9999 629141        | -1 | #DIV/0! | 1 | #DIV/0! |
| Olfr1100 258587      | -1 | #DIV/0! | 1 | #DIV/0! |
| Olfr888 258416       | -1 | #DIV/0! | 1 | #DIV/0! |
| Klk1b1 16623         | -1 | #DIV/0! | 1 | #DIV/0! |
| Has2 15117           | -1 | #DIV/0! | 1 | #DIV/0! |
| Olfr1264 258206      | -1 | #DIV/0! | 1 | #DIV/0! |
| Olfr715 258776       | -1 | #DIV/0! | 1 | #DIV/0! |
| Defb29 75400         | -1 | #DIV/0! | 1 | #DIV/0! |
| Syt14 329324         | -1 | #DIV/0! | 1 | #DIV/0! |
| Defa-ps1 727720      | -1 | #DIV/0! | 1 | #DIV/0! |
| Olfr686 259072       | -1 | #DIV/0! | 1 | #DIV/0! |
| Olfr901 258028       | -1 | #DIV/0! | 1 | #DIV/0! |
| Plac1 56096          | -1 | #DIV/0! | 1 | #DIV/0! |
| 1700042B14Rik 73347  | -1 | #DIV/0! | 1 | #DIV/0! |
| Adcy10 271639        | -1 | #DIV/0! | 1 | #DIV/0! |
| Olfr1306 258023      | -1 | #DIV/0! | 1 | #DIV/0! |
| Mir139 387157        | -1 | #DIV/0! | 1 | #DIV/0! |
| Lemd1 213409         | -1 | #DIV/0! | 1 | #DIV/0! |
| 1600029O15Rik 665268 | -1 | #DIV/0! | 1 | #DIV/0! |
| Nell2 54003          | -1 | #DIV/0! | 1 | #DIV/0! |
| Olfr288 545140       | -1 | #DIV/0! | 1 | #DIV/0! |
| Epx 13861            | -1 | #DIV/0! | 1 | #DIV/0! |
| Olfr1162 258105      | -1 | #DIV/0! | 1 | #DIV/0! |
| Bcat1 12035          | -1 | #DIV/0! | 1 | #DIV/0! |
| Psg18 26438          | -1 | #DIV/0! | 1 | #DIV/0! |
| Vmn1r69 252904       | -1 | #DIV/0! | 1 | #DIV/0! |
| Gm15114 100034729    | -1 | #DIV/0! | 1 | #DIV/0! |
| Dppa2 73703          | -1 | #DIV/0! | 1 | #DIV/0! |
| Olfr466 258816       | -1 | #DIV/0! | 1 | #DIV/0! |
| Hist1h3b 319150      | -1 | #DIV/0! | 1 | #DIV/0! |
| Foxb2 14240          | -1 | #DIV/0! | 1 | #DIV/0! |
| Olfr736 258660       | -1 | #DIV/0! | 1 | #DIV/0! |
| Olfr215 258438       | -1 | #DIV/0! | 1 | #DIV/0! |
| Ccdc135 330830       | -1 | #DIV/0! | 1 | #DIV/0! |
| Uts2 24111           | -1 | #DIV/0! | 1 | #DIV/0! |
| Hyal5 74468          | -1 | #DIV/0! | 1 | #DIV/0! |
| Hoxc9 15427          | -1 | #DIV/0! | 1 | #DIV/0! |
| Prl3c1 27372         | -1 | #DIV/0! | 1 | #DIV/0! |
| Tex11 83558          | -1 | #DIV/0! | 1 | #DIV/0! |
| Vmn1r12 626397       | -1 | #DIV/0! | 1 | #DIV/0! |
| Gm525 217071         | -1 | #DIV/0! | 1 | #DIV/0! |

|                      |    |         |   |         |
|----------------------|----|---------|---|---------|
| Slco1c1 58807        | -1 | #DIV/0! | 1 | #DIV/0! |
| Fscn3 56223          | -1 | #DIV/0! | 1 | #DIV/0! |
| Ssxb5 387586         | -1 | #DIV/0! | 1 | #DIV/0! |
| Tmem92 544806        | -1 | #DIV/0! | 1 | #DIV/0! |
| Olfr410 258702       | -1 | #DIV/0! | 1 | #DIV/0! |
| Mir1898 100316684    | -1 | #DIV/0! | 1 | #DIV/0! |
| Gm4971 244061        | -1 | #DIV/0! | 1 | #DIV/0! |
| Lin28a 83557         | -1 | #DIV/0! | 1 | #DIV/0! |
| Pkd1l2 76645         | -1 | #DIV/0! | 1 | #DIV/0! |
| Olfr1490 258098      | -1 | #DIV/0! | 1 | #DIV/0! |
| Olfr502 258734       | -1 | #DIV/0! | 1 | #DIV/0! |
| Trim75 333307        | -1 | #DIV/0! | 1 | #DIV/0! |
| Krtap10-4 100191037  | -1 | #DIV/0! | 1 | #DIV/0! |
| Drd4 13491           | -1 | #DIV/0! | 1 | #DIV/0! |
| Trim43b 666747       | -1 | #DIV/0! | 1 | #DIV/0! |
| Defa-ps13 654456     | -1 | #DIV/0! | 1 | #DIV/0! |
| Olfr29-ps1 29848     | -1 | #DIV/0! | 1 | #DIV/0! |
| Olfr1168 258524      | -1 | #DIV/0! | 1 | #DIV/0! |
| Il1r2 16178          | -1 | #DIV/0! | 1 | #DIV/0! |
| Magea5 17141         | -1 | #DIV/0! | 1 | #DIV/0! |
| Rtdr1 71236          | -1 | #DIV/0! | 1 | #DIV/0! |
| Olfr1378 258912      | -1 | #DIV/0! | 1 | #DIV/0! |
| 9230113P08Rik 77908  | -1 | #DIV/0! | 1 | #DIV/0! |
| Lrrc36 270091        | -1 | #DIV/0! | 1 | #DIV/0! |
| S100b 20203          | -1 | #DIV/0! | 1 | #DIV/0! |
| Gkn1 66283           | -1 | #DIV/0! | 1 | #DIV/0! |
| Gsdmc3 270328        | -1 | #DIV/0! | 1 | #DIV/0! |
| Olfr127 258374       | -1 | #DIV/0! | 1 | #DIV/0! |
| Mir761 791075        | -1 | #DIV/0! | 1 | #DIV/0! |
| Tex13 83555          | -1 | #DIV/0! | 1 | #DIV/0! |
| Tmem196 217951       | -1 | #DIV/0! | 1 | #DIV/0! |
| Olfr110 258325       | -1 | #DIV/0! | 1 | #DIV/0! |
| Oas1f 243262         | -1 | #DIV/0! | 1 | #DIV/0! |
| Olfr893 258333       | -1 | #DIV/0! | 1 | #DIV/0! |
| Olfr735 257909       | -1 | #DIV/0! | 1 | #DIV/0! |
| Gm14124 100216455    | -1 | #DIV/0! | 1 | #DIV/0! |
| Slc10a4 231290       | -1 | #DIV/0! | 1 | #DIV/0! |
| Trim61 260296        | -1 | #DIV/0! | 1 | #DIV/0! |
| Mtap7d2 78283        | -1 | #DIV/0! | 1 | #DIV/0! |
| Try4 22074           | -1 | #DIV/0! | 1 | #DIV/0! |
| E230019M04Rik 331537 | -1 | #DIV/0! | 1 | #DIV/0! |
| Hoxc13 15422         | -1 | #DIV/0! | 1 | #DIV/0! |
| 2610109H07Rik 70433  | -1 | #DIV/0! | 1 | #DIV/0! |
| 2410018L13Rik 69732  | -1 | #DIV/0! | 1 | #DIV/0! |
| Gm12633 619842       | -1 | #DIV/0! | 1 | #DIV/0! |
| Dsg1b 225256         | -1 | #DIV/0! | 1 | #DIV/0! |
| Crisp1 11571         | -1 | #DIV/0! | 1 | #DIV/0! |
| Alx1 216285          | -1 | #DIV/0! | 1 | #DIV/0! |
| Lce6a 78382          | -1 | #DIV/0! | 1 | #DIV/0! |
| Six4 20474           | -1 | #DIV/0! | 1 | #DIV/0! |
| Scd4 329065          | -1 | #DIV/0! | 1 | #DIV/0! |
| Plcz1 114875         | -1 | #DIV/0! | 1 | #DIV/0! |
| Serpinb9b 20706      | -1 | #DIV/0! | 1 | #DIV/0! |

|                     |    |         |   |         |
|---------------------|----|---------|---|---------|
| Mir666 751521       | -1 | #DIV/0! | 1 | #DIV/0! |
| Olfr1232 258320     | -1 | #DIV/0! | 1 | #DIV/0! |
| Mir1186b 100499527  | -1 | #DIV/0! | 1 | #DIV/0! |
| Kcnj1 56379         | -1 | #DIV/0! | 1 | #DIV/0! |
| Sncb 104069         | -1 | #DIV/0! | 1 | #DIV/0! |
| Gm5820 545253       | -1 | #DIV/0! | 1 | #DIV/0! |
| Gm17252 100312987   | -1 | #DIV/0! | 1 | #DIV/0! |
| Mir509 100124449    | -1 | #DIV/0! | 1 | #DIV/0! |
| Olfr1093 258363     | -1 | #DIV/0! | 1 | #DIV/0! |
| Vmn1r160 620758     | -1 | #DIV/0! | 1 | #DIV/0! |
| Olfr58 18358        | -1 | #DIV/0! | 1 | #DIV/0! |
| Mir208b 100124433   | -1 | #DIV/0! | 1 | #DIV/0! |
| Psg29 114872        | -1 | #DIV/0! | 1 | #DIV/0! |
| BB019430 103505     | -1 | #DIV/0! | 1 | #DIV/0! |
| Olfr965 258165      | -1 | #DIV/0! | 1 | #DIV/0! |
| Mir504 100124476    | -1 | #DIV/0! | 1 | #DIV/0! |
| Mir599 100316736    | -1 | #DIV/0! | 1 | #DIV/0! |
| Fbxo48 319701       | -1 | #DIV/0! | 1 | #DIV/0! |
| Kcna10 242151       | -1 | #DIV/0! | 1 | #DIV/0! |
| Glycam1 14663       | -1 | #DIV/0! | 1 | #DIV/0! |
| Vcan 13003          | -1 | #DIV/0! | 1 | #DIV/0! |
| Ubqln3 244178       | -1 | #DIV/0! | 1 | #DIV/0! |
| Spink7 408198       | -1 | #DIV/0! | 1 | #DIV/0! |
| Oc90 18256          | -1 | #DIV/0! | 1 | #DIV/0! |
| Wnt16 93735         | -1 | #DIV/0! | 1 | #DIV/0! |
| Ceacam12 67315      | -1 | #DIV/0! | 1 | #DIV/0! |
| Lrp1b 94217         | -1 | #DIV/0! | 1 | #DIV/0! |
| Spr2i 20763         | -1 | #DIV/0! | 1 | #DIV/0! |
| Cym 229697          | -1 | #DIV/0! | 1 | #DIV/0! |
| Gm1679 381667       | -1 | #DIV/0! | 1 | #DIV/0! |
| Magea3 17139        | -1 | #DIV/0! | 1 | #DIV/0! |
| Olfr1186 258523     | -1 | #DIV/0! | 1 | #DIV/0! |
| Lcn6 620709         | -1 | #DIV/0! | 1 | #DIV/0! |
| Gm884 380730        | -1 | #DIV/0! | 1 | #DIV/0! |
| Capsl 75568         | -1 | #DIV/0! | 1 | #DIV/0! |
| Snord87 266793      | -1 | #DIV/0! | 1 | #DIV/0! |
| Kif4-ps 74947       | -1 | #DIV/0! | 1 | #DIV/0! |
| Gpr75 237716        | -1 | #DIV/0! | 1 | #DIV/0! |
| Tcte1 21645         | -1 | #DIV/0! | 1 | #DIV/0! |
| Abhd12b 328121      | -1 | #DIV/0! | 1 | #DIV/0! |
| Clec4b1 69810       | -1 | #DIV/0! | 1 | #DIV/0! |
| Lrrc30 240131       | -1 | #DIV/0! | 1 | #DIV/0! |
| Gm10486 100039550   | -1 | #DIV/0! | 1 | #DIV/0! |
| Gm16119 100271841   | -1 | #DIV/0! | 1 | #DIV/0! |
| Irx5 54352          | -1 | #DIV/0! | 1 | #DIV/0! |
| Odz2 23964          | -1 | #DIV/0! | 1 | #DIV/0! |
| Zfyve28 231125      | -1 | #DIV/0! | 1 | #DIV/0! |
| 4933400A11Rik 66747 | -1 | #DIV/0! | 1 | #DIV/0! |
| Obox1 71468         | -1 | #DIV/0! | 1 | #DIV/0! |
| Pramel1 83491       | -1 | #DIV/0! | 1 | #DIV/0! |
| Gm8817 667794       | -1 | #DIV/0! | 1 | #DIV/0! |
| Olfr656 259078      | -1 | #DIV/0! | 1 | #DIV/0! |
| Cmtm5 67272         | -1 | #DIV/0! | 1 | #DIV/0! |

|                      |    |         |   |         |
|----------------------|----|---------|---|---------|
| Accsl 381411         | -1 | #DIV/0! | 1 | #DIV/0! |
| Gm13078 277666       | -1 | #DIV/0! | 1 | #DIV/0! |
| Mir338 723844        | -1 | #DIV/0! | 1 | #DIV/0! |
| Olfr538 258201       | -1 | #DIV/0! | 1 | #DIV/0! |
| Padi6 242726         | -1 | #DIV/0! | 1 | #DIV/0! |
| Gal 14419            | -1 | #DIV/0! | 1 | #DIV/0! |
| 1700109F18Rik 73429  | -1 | #DIV/0! | 1 | #DIV/0! |
| Gpr63 81006          | -1 | #DIV/0! | 1 | #DIV/0! |
| Krtap14 23927        | -1 | #DIV/0! | 1 | #DIV/0! |
| Cldn8 54420          | -1 | #DIV/0! | 1 | #DIV/0! |
| Tmc5 74424           | -1 | #DIV/0! | 1 | #DIV/0! |
| Frmd3 242506         | -1 | #DIV/0! | 1 | #DIV/0! |
| Slc38a5 209837       | -1 | #DIV/0! | 1 | #DIV/0! |
| Vmn1r80 171238       | -1 | #DIV/0! | 1 | #DIV/0! |
| Gm20580 100126777    | -1 | #DIV/0! | 1 | #DIV/0! |
| Slitrk2 245450       | -1 | #DIV/0! | 1 | #DIV/0! |
| Wif1 24117           | -1 | #DIV/0! | 1 | #DIV/0! |
| 4922505E12Rik 433386 | -1 | #DIV/0! | 1 | #DIV/0! |
| Olfr168 258354       | -1 | #DIV/0! | 1 | #DIV/0! |
| Olfr583 258752       | -1 | #DIV/0! | 1 | #DIV/0! |
| Gm7257 639025        | -1 | #DIV/0! | 1 | #DIV/0! |
| Vmn2r65 100009609    | -1 | #DIV/0! | 1 | #DIV/0! |
| lqcf1 74267          | -1 | #DIV/0! | 1 | #DIV/0! |
| Olfr317 257931       | -1 | #DIV/0! | 1 | #DIV/0! |
| Sycn 68416           | -1 | #DIV/0! | 1 | #DIV/0! |
| 4930448K20Rik 74662  | -1 | #DIV/0! | 1 | #DIV/0! |
| Pbsn 54192           | -1 | #DIV/0! | 1 | #DIV/0! |
| Gm11961 327860       | -1 | #DIV/0! | 1 | #DIV/0! |
| Olfr270 258600       | -1 | #DIV/0! | 1 | #DIV/0! |
| Mir199b 387239       | -1 | #DIV/0! | 1 | #DIV/0! |
| Gm1587 380920        | -1 | #DIV/0! | 1 | #DIV/0! |
| Mir223 723814        | -1 | #DIV/0! | 1 | #DIV/0! |
| Olfr1480 404339      | -1 | #DIV/0! | 1 | #DIV/0! |
| Olfr668 259061       | -1 | #DIV/0! | 1 | #DIV/0! |
| Olfr1216 258895      | -1 | #DIV/0! | 1 | #DIV/0! |
| Olfr75-ps1 258186    | -1 | #DIV/0! | 1 | #DIV/0! |
| Myt1l 17933          | -1 | #DIV/0! | 1 | #DIV/0! |
| Ccr1l1 12770         | -1 | #DIV/0! | 1 | #DIV/0! |
| Nlrp2 232827         | -1 | #DIV/0! | 1 | #DIV/0! |
| Lgr6 329252          | -1 | #DIV/0! | 1 | #DIV/0! |
| 4833403l15Rik 74574  | -1 | #DIV/0! | 1 | #DIV/0! |
| Olfr180 258178       | -1 | #DIV/0! | 1 | #DIV/0! |
| Olfr1322 257978      | -1 | #DIV/0! | 1 | #DIV/0! |
| Pdcd1 18566          | -1 | #DIV/0! | 1 | #DIV/0! |
| Defa21 66298         | -1 | #DIV/0! | 1 | #DIV/0! |
| Btn3a3 632126        | -1 | #DIV/0! | 1 | #DIV/0! |
| Snord19 100217423    | -1 | #DIV/0! | 1 | #DIV/0! |
| Ropn1 76378          | -1 | #DIV/0! | 1 | #DIV/0! |
| Mir19a 723891        | -1 | #DIV/0! | 1 | #DIV/0! |
| 4930578l06Rik 67750  | -1 | #DIV/0! | 1 | #DIV/0! |
| Mir1906-1 100316809  | -1 | #DIV/0! | 1 | #DIV/0! |
| Olfr1042 257941      | -1 | #DIV/0! | 1 | #DIV/0! |
| Mir3089 100526499    | -1 | #DIV/0! | 1 | #DIV/0! |

|                      |    |         |   |         |
|----------------------|----|---------|---|---------|
| Pcdhb1 93872         | -1 | #DIV/0! | 1 | #DIV/0! |
| Wnt3a 22416          | -1 | #DIV/0! | 1 | #DIV/0! |
| Tm4sf19 277203       | -1 | #DIV/0! | 1 | #DIV/0! |
| Ang4 219033          | -1 | #DIV/0! | 1 | #DIV/0! |
| D630041G03Rik 320749 | -1 | #DIV/0! | 1 | #DIV/0! |
| 2310079G19Rik 69699  | -1 | #DIV/0! | 1 | #DIV/0! |
| 1700123I01Rik 622554 | -1 | #DIV/0! | 1 | #DIV/0! |
| Neurod6 11922        | -1 | #DIV/0! | 1 | #DIV/0! |
| Chrna5 110835        | -1 | #DIV/0! | 1 | #DIV/0! |
| Mir720 735260        | -1 | #DIV/0! | 1 | #DIV/0! |
| Krtap3-2 66708       | -1 | #DIV/0! | 1 | #DIV/0! |
| Olfr134 258829       | -1 | #DIV/0! | 1 | #DIV/0! |
| Olfr945 258499       | -1 | #DIV/0! | 1 | #DIV/0! |
| Olfr493 258307       | -1 | #DIV/0! | 1 | #DIV/0! |
| Nol4 319211          | -1 | #DIV/0! | 1 | #DIV/0! |
| Olfr19 18316         | -1 | #DIV/0! | 1 | #DIV/0! |
| Gpr173 70771         | -1 | #DIV/0! | 1 | #DIV/0! |
| Olfr1370 258528      | -1 | #DIV/0! | 1 | #DIV/0! |
| Calca 12310          | -1 | #DIV/0! | 1 | #DIV/0! |
| Il19 329244          | -1 | #DIV/0! | 1 | #DIV/0! |
| Isx 71597            | -1 | #DIV/0! | 1 | #DIV/0! |
| Gm4598 100043706     | -1 | #DIV/0! | 1 | #DIV/0! |
| Gp6 243816           | -1 | #DIV/0! | 1 | #DIV/0! |
| Olfr120 258624       | -1 | #DIV/0! | 1 | #DIV/0! |
| Olfr622 259087       | -1 | #DIV/0! | 1 | #DIV/0! |
| Fcrl6 677296         | -1 | #DIV/0! | 1 | #DIV/0! |
| Kntc1 208628         | -1 | #DIV/0! | 1 | #DIV/0! |
| Olfr1245 258784      | -1 | #DIV/0! | 1 | #DIV/0! |
| Mir700 735285        | -1 | #DIV/0! | 1 | #DIV/0! |
| Olfr1431 258409      | -1 | #DIV/0! | 1 | #DIV/0! |
| Adad1 21744          | -1 | #DIV/0! | 1 | #DIV/0! |
| Fam26d 270711        | -1 | #DIV/0! | 1 | #DIV/0! |
| Rhox11 194738        | -1 | #DIV/0! | 1 | #DIV/0! |
| Olfr1211 258025      | -1 | #DIV/0! | 1 | #DIV/0! |
| Tas2r109 387343      | -1 | #DIV/0! | 1 | #DIV/0! |
| Mir698 735263        | -1 | #DIV/0! | 1 | #DIV/0! |
| Olfr1477 258691      | -1 | #DIV/0! | 1 | #DIV/0! |
| Mlc1 170790          | -1 | #DIV/0! | 1 | #DIV/0! |
| Xkr4 497097          | -1 | #DIV/0! | 1 | #DIV/0! |
| Olfr20 258925        | -1 | #DIV/0! | 1 | #DIV/0! |
| Mir434 723867        | -1 | #DIV/0! | 1 | #DIV/0! |
| Luzp4 434865         | -1 | #DIV/0! | 1 | #DIV/0! |
| Dnajc5b 66326        | -1 | #DIV/0! | 1 | #DIV/0! |
| Nespas 56802         | -1 | #DIV/0! | 1 | #DIV/0! |
| Otx1 18423           | -1 | #DIV/0! | 1 | #DIV/0! |
| Snap25 20614         | -1 | #DIV/0! | 1 | #DIV/0! |
| Olfr412 258153       | -1 | #DIV/0! | 1 | #DIV/0! |
| Pla2g2a 18780        | -1 | #DIV/0! | 1 | #DIV/0! |
| Mir1951 100316703    | -1 | #DIV/0! | 1 | #DIV/0! |
| Olfr969 258823       | -1 | #DIV/0! | 1 | #DIV/0! |
| Zscan4f 665902       | -1 | #DIV/0! | 1 | #DIV/0! |
| Vmn2r69 330581       | -1 | #DIV/0! | 1 | #DIV/0! |
| Olfr455 546896       | -1 | #DIV/0! | 1 | #DIV/0! |

|                     |    |         |   |         |
|---------------------|----|---------|---|---------|
| Nlrp1c-ps 627984    | -1 | #DIV/0! | 1 | #DIV/0! |
| Olfr577 259113      | -1 | #DIV/0! | 1 | #DIV/0! |
| Pex5l 58869         | -1 | #DIV/0! | 1 | #DIV/0! |
| Tcerg1l 70571       | -1 | #DIV/0! | 1 | #DIV/0! |
| Mir2137 100316779   | -1 | #DIV/0! | 1 | #DIV/0! |
| Cldn11 18417        | -1 | #DIV/0! | 1 | #DIV/0! |
| Cpne4 74020         | -1 | #DIV/0! | 1 | #DIV/0! |
| Gm4133 100042964    | -1 | #DIV/0! | 1 | #DIV/0! |
| Mir215 387211       | -1 | #DIV/0! | 1 | #DIV/0! |
| Cacna2d4 319734     | -1 | #DIV/0! | 1 | #DIV/0! |
| Csn1s2a 12993       | -1 | #DIV/0! | 1 | #DIV/0! |
| Lgals7 16858        | -1 | #DIV/0! | 1 | #DIV/0! |
| Gm5142 380907       | -1 | #DIV/0! | 1 | #DIV/0! |
| Olfr824 258669      | -1 | #DIV/0! | 1 | #DIV/0! |
| 41164 71089         | -1 | #DIV/0! | 1 | #DIV/0! |
| Olfr698 258595      | -1 | #DIV/0! | 1 | #DIV/0! |
| Olfr1052 259012     | -1 | #DIV/0! | 1 | #DIV/0! |
| Gm20516 100126768   | -1 | #DIV/0! | 1 | #DIV/0! |
| Vmn2r24 243628      | -1 | #DIV/0! | 1 | #DIV/0! |
| 2810408A11Rik 70419 | -1 | #DIV/0! | 1 | #DIV/0! |
| Try10 436522        | -1 | #DIV/0! | 1 | #DIV/0! |
| BC048562 434439     | -1 | #DIV/0! | 1 | #DIV/0! |
| Olfr138 170648      | -1 | #DIV/0! | 1 | #DIV/0! |
| Olfr654 258377      | -1 | #DIV/0! | 1 | #DIV/0! |
| Npas3 27386         | -1 | #DIV/0! | 1 | #DIV/0! |
| Tmprss13 214531     | -1 | #DIV/0! | 1 | #DIV/0! |
| Gml 625599          | -1 | #DIV/0! | 1 | #DIV/0! |
| Olfr1120 259031     | -1 | #DIV/0! | 1 | #DIV/0! |
| Bpifa1 18843        | -1 | #DIV/0! | 1 | #DIV/0! |
| Ccdc42b 546886      | -1 | #DIV/0! | 1 | #DIV/0! |
| Wfdc10 629756       | -1 | #DIV/0! | 1 | #DIV/0! |
| Tas2r114 387346     | -1 | #DIV/0! | 1 | #DIV/0! |
| Olfr1138 258632     | -1 | #DIV/0! | 1 | #DIV/0! |
| Brsk2 75770         | -1 | #DIV/0! | 1 | #DIV/0! |
| Fam194a 545527      | -1 | #DIV/0! | 1 | #DIV/0! |
| Ina 226180          | -1 | #DIV/0! | 1 | #DIV/0! |
| Shisa3 330096       | -1 | #DIV/0! | 1 | #DIV/0! |
| Ucp1 22227          | -1 | #DIV/0! | 1 | #DIV/0! |
| Defb7 246080        | -1 | #DIV/0! | 1 | #DIV/0! |
| Snora44 100217418   | -1 | #DIV/0! | 1 | #DIV/0! |
| Snord1c 100216536   | -1 | #DIV/0! | 1 | #DIV/0! |
| Moxd1 59012         | -1 | #DIV/0! | 1 | #DIV/0! |
| Olfr804 258068      | -1 | #DIV/0! | 1 | #DIV/0! |
| Gm15386 654464      | -1 | #DIV/0! | 1 | #DIV/0! |
| T2 21331            | -1 | #DIV/0! | 1 | #DIV/0! |
| Snord96a 100216534  | -1 | #DIV/0! | 1 | #DIV/0! |
| Epo 13856           | -1 | #DIV/0! | 1 | #DIV/0! |
| Snph 241727         | -1 | #DIV/0! | 1 | #DIV/0! |
| Klra18 93970        | -1 | #DIV/0! | 1 | #DIV/0! |
| Fam150b 100294583   | -1 | #DIV/0! | 1 | #DIV/0! |
| Cyp2j7-ps 546837    | -1 | #DIV/0! | 1 | #DIV/0! |
| Rorb 225998         | -1 | #DIV/0! | 1 | #DIV/0! |
| Il1rapl2 60367      | -1 | #DIV/0! | 1 | #DIV/0! |

|                         |    |         |   |         |
|-------------------------|----|---------|---|---------|
| Il20ra 237313           | -1 | #DIV/0! | 1 | #DIV/0! |
| Ernmn 77767             | -1 | #DIV/0! | 1 | #DIV/0! |
| H2-M10.1 14985          | -1 | #DIV/0! | 1 | #DIV/0! |
| Gm10104 100041688       | -1 | #DIV/0! | 1 | #DIV/0! |
| Prm3 19120              | -1 | #DIV/0! | 1 | #DIV/0! |
| Klk6 19144              | -1 | #DIV/0! | 1 | #DIV/0! |
| Il25 140806             | -1 | #DIV/0! | 1 | #DIV/0! |
| Gm10512 100038394       | -1 | #DIV/0! | 1 | #DIV/0! |
| Col6a4 68553            | -1 | #DIV/0! | 1 | #DIV/0! |
| Cldn9 56863             | -1 | #DIV/0! | 1 | #DIV/0! |
| Pnma5 385377            | -1 | #DIV/0! | 1 | #DIV/0! |
| Grxcr1 433899           | -1 | #DIV/0! | 1 | #DIV/0! |
| Mir708 735284           | -1 | #DIV/0! | 1 | #DIV/0! |
| Pou5f2 75507            | -1 | #DIV/0! | 1 | #DIV/0! |
| Olfr734 258658          | -1 | #DIV/0! | 1 | #DIV/0! |
| Vmn1r19 171200          | -1 | #DIV/0! | 1 | #DIV/0! |
| Ypel4 241525            | -1 | #DIV/0! | 1 | #DIV/0! |
| Ambn 11698              | -1 | #DIV/0! | 1 | #DIV/0! |
| C87977 97187            | -1 | #DIV/0! | 1 | #DIV/0! |
| Mybpc1 109272           | -1 | #DIV/0! | 1 | #DIV/0! |
| Vmn1r116 667268         | -1 | #DIV/0! | 1 | #DIV/0! |
| Mir760 791077           | -1 | #DIV/0! | 1 | #DIV/0! |
| Gabrp 216643            | -1 | #DIV/0! | 1 | #DIV/0! |
| Olfr332 257932          | -1 | #DIV/0! | 1 | #DIV/0! |
| Gm614 245536            | -1 | #DIV/0! | 1 | #DIV/0! |
| Mir471 723939           | -1 | #DIV/0! | 1 | #DIV/0! |
| Sp8 320145              | -1 | #DIV/0! | 1 | #DIV/0! |
| Olfr1261 258466         | -1 | #DIV/0! | 1 | #DIV/0! |
| Gpr139 209776           | -1 | #DIV/0! | 1 | #DIV/0! |
| Bpifb9b 433492          | -1 | #DIV/0! | 1 | #DIV/0! |
| Gira4 14657             | -1 | #DIV/0! | 1 | #DIV/0! |
| Cd163l1 244233          | -1 | #DIV/0! | 1 | #DIV/0! |
| Gm20581 100126779       | -1 | #DIV/0! | 1 | #DIV/0! |
| Olfr612 545985          | -1 | #DIV/0! | 1 | #DIV/0! |
| Vmn1r224 665525         | -1 | #DIV/0! | 1 | #DIV/0! |
| Olfr1243 258971         | -1 | #DIV/0! | 1 | #DIV/0! |
| Vmn1r8 171205           | -1 | #DIV/0! | 1 | #DIV/0! |
| Irx6 64379              | -1 | #DIV/0! | 1 | #DIV/0! |
| Glyatl3 435528          | -1 | #DIV/0! | 1 | #DIV/0! |
| Mir468 723871           | -1 | #DIV/0! | 1 | #DIV/0! |
| Mir200c 723944          | -1 | #DIV/0! | 1 | #DIV/0! |
| Scarna17 100217466      | -1 | #DIV/0! | 1 | #DIV/0! |
| Olfr1183 258522         | -1 | #DIV/0! | 1 | #DIV/0! |
| 5330434G04Rik 100043213 | -1 | #DIV/0! | 1 | #DIV/0! |
| Prss28 114661           | -1 | #DIV/0! | 1 | #DIV/0! |
| 1700108J01Rik 68245     | -1 | #DIV/0! | 1 | #DIV/0! |
| 1700018B08Rik 76405     | -1 | #DIV/0! | 1 | #DIV/0! |
| Kcnh1 16510             | -1 | #DIV/0! | 1 | #DIV/0! |
| Olfr319 258493          | -1 | #DIV/0! | 1 | #DIV/0! |
| Olfr1219 258901         | -1 | #DIV/0! | 1 | #DIV/0! |
| Olfr242 406175          | -1 | #DIV/0! | 1 | #DIV/0! |
| Actrt2 73353            | -1 | #DIV/0! | 1 | #DIV/0! |
| Olfr859 258519          | -1 | #DIV/0! | 1 | #DIV/0! |

|                         |    |         |   |         |
|-------------------------|----|---------|---|---------|
| Mir693 751553           | -1 | #DIV/0! | 1 | #DIV/0! |
| Emx1 13796              | -1 | #DIV/0! | 1 | #DIV/0! |
| A330021E22Rik 207686    | -1 | #DIV/0! | 1 | #DIV/0! |
| Rhd 19746               | -1 | #DIV/0! | 1 | #DIV/0! |
| Cdh15 12555             | -1 | #DIV/0! | 1 | #DIV/0! |
| Vmn1r188 252912         | -1 | #DIV/0! | 1 | #DIV/0! |
| Olfr482 258728          | -1 | #DIV/0! | 1 | #DIV/0! |
| B3gnt5 108105           | -1 | #DIV/0! | 1 | #DIV/0! |
| Slc6a3 13162            | -1 | #DIV/0! | 1 | #DIV/0! |
| Gm10649 100039211       | -1 | #DIV/0! | 1 | #DIV/0! |
| Kcnk15 241769           | -1 | #DIV/0! | 1 | #DIV/0! |
| Slc39a12 277468         | -1 | #DIV/0! | 1 | #DIV/0! |
| Ccdc63 330188           | -1 | #DIV/0! | 1 | #DIV/0! |
| Olfr1312 258359         | -1 | #DIV/0! | 1 | #DIV/0! |
| C2cd4a 244911           | -1 | #DIV/0! | 1 | #DIV/0! |
| Olfr691 259063          | -1 | #DIV/0! | 1 | #DIV/0! |
| Spr2a1 20755            | -1 | #DIV/0! | 1 | #DIV/0! |
| Defa17 23855            | -1 | #DIV/0! | 1 | #DIV/0! |
| Gnrhr 14715             | -1 | #DIV/0! | 1 | #DIV/0! |
| 4930447C04Rik 75801     | -1 | #DIV/0! | 1 | #DIV/0! |
| Krt74 406222            | -1 | #DIV/0! | 1 | #DIV/0! |
| Awat1 245533            | -1 | #DIV/0! | 1 | #DIV/0! |
| LOC100302567 100302567  | -1 | #DIV/0! | 1 | #DIV/0! |
| Mir486 723876           | -1 | #DIV/0! | 1 | #DIV/0! |
| Mir103-2 723825         | -1 | #DIV/0! | 1 | #DIV/0! |
| 3110099E03Rik 100043232 | -1 | #DIV/0! | 1 | #DIV/0! |
| Mir1905 100316808       | -1 | #DIV/0! | 1 | #DIV/0! |
| Mir466i 100316665       | -1 | #DIV/0! | 1 | #DIV/0! |
| Olfr186 258318          | -1 | #DIV/0! | 1 | #DIV/0! |
| Gm13547 433416          | -1 | #DIV/0! | 1 | #DIV/0! |
| Olfr1387 258465         | -1 | #DIV/0! | 1 | #DIV/0! |
| Cldn22 75677            | -1 | #DIV/0! | 1 | #DIV/0! |
| Hist1h2bf 319180        | -1 | #DIV/0! | 1 | #DIV/0! |
| Fbxw24 382106           | -1 | #DIV/0! | 1 | #DIV/0! |
| Mir493 100124466        | -1 | #DIV/0! | 1 | #DIV/0! |
| Cer1 12622              | -1 | #DIV/0! | 1 | #DIV/0! |
| Olfr202 258997          | -1 | #DIV/0! | 1 | #DIV/0! |
| Avpr2 12000             | -1 | #DIV/0! | 1 | #DIV/0! |
| Slc6a14 56774           | -1 | #DIV/0! | 1 | #DIV/0! |
| Itgb6 16420             | -1 | #DIV/0! | 1 | #DIV/0! |
| Ret 19713               | -1 | #DIV/0! | 1 | #DIV/0! |
| Krtap8-1 16703          | -1 | #DIV/0! | 1 | #DIV/0! |
| Gm10510 100038481       | -1 | #DIV/0! | 1 | #DIV/0! |
| Magee2 272790           | -1 | #DIV/0! | 1 | #DIV/0! |
| Calhm1 546729           | -1 | #DIV/0! | 1 | #DIV/0! |
| Kel 23925               | -1 | #DIV/0! | 1 | #DIV/0! |
| Lelp1 69332             | -1 | #DIV/0! | 1 | #DIV/0! |
| Olfr1471 258231         | -1 | #DIV/0! | 1 | #DIV/0! |
| Skint9 329918           | -1 | #DIV/0! | 1 | #DIV/0! |
| Olfr867 257898          | -1 | #DIV/0! | 1 | #DIV/0! |
| Tnmd 64103              | -1 | #DIV/0! | 1 | #DIV/0! |
| Rspo2 239405            | -1 | #DIV/0! | 1 | #DIV/0! |
| Gm11541 432589          | -1 | #DIV/0! | 1 | #DIV/0! |



|                      |    |         |   |         |
|----------------------|----|---------|---|---------|
| Fam162b 77296        | -1 | #DIV/0! | 1 | #DIV/0! |
| Mir301b 791069       | -1 | #DIV/0! | 1 | #DIV/0! |
| Gm14345 630022       | -1 | #DIV/0! | 1 | #DIV/0! |
| Fam190a 232035       | -1 | #DIV/0! | 1 | #DIV/0! |
| Stfa1 20861          | -1 | #DIV/0! | 1 | #DIV/0! |
| Xlr5c 27084          | -1 | #DIV/0! | 1 | #DIV/0! |
| 4930595M18Rik 245492 | -1 | #DIV/0! | 1 | #DIV/0! |
| Olfr894 258868       | -1 | #DIV/0! | 1 | #DIV/0! |
| Trhr2 170732         | -1 | #DIV/0! | 1 | #DIV/0! |
| Baiap3 545192        | -1 | #DIV/0! | 1 | #DIV/0! |
| Snora3 100302499     | -1 | #DIV/0! | 1 | #DIV/0! |
| Slc7a12 140918       | -1 | #DIV/0! | 1 | #DIV/0! |
| Drd1a 13488          | -1 | #DIV/0! | 1 | #DIV/0! |
| Plac8l1 69401        | -1 | #DIV/0! | 1 | #DIV/0! |
| Olfr17 18314         | -1 | #DIV/0! | 1 | #DIV/0! |
| Vmn2r-ps60 628490    | -1 | #DIV/0! | 1 | #DIV/0! |
| Snora65 104367       | -1 | #DIV/0! | 1 | #DIV/0! |
| Myt1 17932           | -1 | #DIV/0! | 1 | #DIV/0! |
| Tyr 22173            | -1 | #DIV/0! | 1 | #DIV/0! |
| Cplx3 235415         | -1 | #DIV/0! | 1 | #DIV/0! |
| Vmn1r238 100312476   | -1 | #DIV/0! | 1 | #DIV/0! |
| Rag2 19374           | -1 | #DIV/0! | 1 | #DIV/0! |
| Ppp1r2-ps9 67395     | -1 | #DIV/0! | 1 | #DIV/0! |
| Gast 14459           | -1 | #DIV/0! | 1 | #DIV/0! |
| Olfr1214 258899      | -1 | #DIV/0! | 1 | #DIV/0! |
| Grin2c 14813         | -1 | #DIV/0! | 1 | #DIV/0! |
| Cpa1 109697          | -1 | #DIV/0! | 1 | #DIV/0! |
| Taar6 215855         | -1 | #DIV/0! | 1 | #DIV/0! |
| Gm4981 245263        | -1 | #DIV/0! | 1 | #DIV/0! |
| Vmn1r55 384522       | -1 | #DIV/0! | 1 | #DIV/0! |
| Olfr272 258836       | -1 | #DIV/0! | 1 | #DIV/0! |
| Olfr1116-ps 257875   | -1 | #DIV/0! | 1 | #DIV/0! |
| Olfr368 258371       | -1 | #DIV/0! | 1 | #DIV/0! |
| Olfr105-ps 257893    | -1 | #DIV/0! | 1 | #DIV/0! |
| 40972 381270         | -1 | #DIV/0! | 1 | #DIV/0! |
| Capza3 12344         | -1 | #DIV/0! | 1 | #DIV/0! |
| Olfr453 258016       | -1 | #DIV/0! | 1 | #DIV/0! |
| Ttc29 73301          | -1 | #DIV/0! | 1 | #DIV/0! |
| Srrm3 58212          | -1 | #DIV/0! | 1 | #DIV/0! |
| Gm3696 100042149     | -1 | #DIV/0! | 1 | #DIV/0! |
| Mir464 723943        | -1 | #DIV/0! | 1 | #DIV/0! |
| Olfr128 383243       | -1 | #DIV/0! | 1 | #DIV/0! |
| 1700022A21Rik 72252  | -1 | #DIV/0! | 1 | #DIV/0! |
| Olfr777 258537       | -1 | #DIV/0! | 1 | #DIV/0! |
| Gm1332 383766        | -1 | #DIV/0! | 1 | #DIV/0! |
| 1700003M02Rik 69329  | -1 | #DIV/0! | 1 | #DIV/0! |
| Gsdma2 76758         | -1 | #DIV/0! | 1 | #DIV/0! |
| Olfr1051 404324      | -1 | #DIV/0! | 1 | #DIV/0! |
| Mog 17441            | -1 | #DIV/0! | 1 | #DIV/0! |
| Nnat 18111           | -1 | #DIV/0! | 1 | #DIV/0! |
| Olfr843 258560       | -1 | #DIV/0! | 1 | #DIV/0! |
| Fa2h 338521          | -1 | #DIV/0! | 1 | #DIV/0! |
| Lyzl1 67328          | -1 | #DIV/0! | 1 | #DIV/0! |

|                      |    |         |   |         |
|----------------------|----|---------|---|---------|
| Scarna3b 100217447   | -1 | #DIV/0! | 1 | #DIV/0! |
| Hbb-y 15135          | -1 | #DIV/0! | 1 | #DIV/0! |
| 2410004A20Rik 66991  | -1 | #DIV/0! | 1 | #DIV/0! |
| Olfr1170 258525      | -1 | #DIV/0! | 1 | #DIV/0! |
| Vmn1r37 171183       | -1 | #DIV/0! | 1 | #DIV/0! |
| Tssk5 73542          | -1 | #DIV/0! | 1 | #DIV/0! |
| Rp1 19888            | -1 | #DIV/0! | 1 | #DIV/0! |
| Vmn2r91 665210       | -1 | #DIV/0! | 1 | #DIV/0! |
| Myl10 59310          | -1 | #DIV/0! | 1 | #DIV/0! |
| Vmn1r56 81015        | -1 | #DIV/0! | 1 | #DIV/0! |
| Alppl2 11650         | -1 | #DIV/0! | 1 | #DIV/0! |
| Olfr275 258857       | -1 | #DIV/0! | 1 | #DIV/0! |
| Sstr1 20605          | -1 | #DIV/0! | 1 | #DIV/0! |
| Lrrc69 73314         | -1 | #DIV/0! | 1 | #DIV/0! |
| Olfr1248 258787      | -1 | #DIV/0! | 1 | #DIV/0! |
| Csn3 12994           | -1 | #DIV/0! | 1 | #DIV/0! |
| Galnt13 271786       | -1 | #DIV/0! | 1 | #DIV/0! |
| 4930578C19Rik 75905  | -1 | #DIV/0! | 1 | #DIV/0! |
| Matn1 17180          | -1 | #DIV/0! | 1 | #DIV/0! |
| Hist2h2bb 319189     | -1 | #DIV/0! | 1 | #DIV/0! |
| Gpr33 14762          | -1 | #DIV/0! | 1 | #DIV/0! |
| Tdpoz2 399673        | -1 | #DIV/0! | 1 | #DIV/0! |
| Klra19 93971         | -1 | #DIV/0! | 1 | #DIV/0! |
| Nog 18121            | -1 | #DIV/0! | 1 | #DIV/0! |
| Olfr605 258156       | -1 | #DIV/0! | 1 | #DIV/0! |
| 2610100L16Rik 70441  | -1 | #DIV/0! | 1 | #DIV/0! |
| Olfr1311 258271      | -1 | #DIV/0! | 1 | #DIV/0! |
| Mixl1 27217          | -1 | #DIV/0! | 1 | #DIV/0! |
| 1700093K21Rik 67358  | -1 | #DIV/0! | 1 | #DIV/0! |
| Nkx3-2 12020         | -1 | #DIV/0! | 1 | #DIV/0! |
| Olfr985 258854       | -1 | #DIV/0! | 1 | #DIV/0! |
| Olfr108 258457       | -1 | #DIV/0! | 1 | #DIV/0! |
| Gm1110 382064        | -1 | #DIV/0! | 1 | #DIV/0! |
| Olfr310 258222       | -1 | #DIV/0! | 1 | #DIV/0! |
| Zfp600 667666        | -1 | #DIV/0! | 1 | #DIV/0! |
| Gm11565 670550       | -1 | #DIV/0! | 1 | #DIV/0! |
| Gm5634 434726        | -1 | #DIV/0! | 1 | #DIV/0! |
| Zcchc12 72693        | -1 | #DIV/0! | 1 | #DIV/0! |
| Madcam1 17123        | -1 | #DIV/0! | 1 | #DIV/0! |
| Olfr1484 258288      | -1 | #DIV/0! | 1 | #DIV/0! |
| Spaca3 75622         | -1 | #DIV/0! | 1 | #DIV/0! |
| Krt71 56735          | -1 | #DIV/0! | 1 | #DIV/0! |
| Sval2 84543          | -1 | #DIV/0! | 1 | #DIV/0! |
| Pnck 93843           | -1 | #DIV/0! | 1 | #DIV/0! |
| 1700001F09Rik 71826  | -1 | #DIV/0! | 1 | #DIV/0! |
| Pcdhac2 353237       | -1 | #DIV/0! | 1 | #DIV/0! |
| Olfr301 257958       | -1 | #DIV/0! | 1 | #DIV/0! |
| Lipk 240633          | -1 | #DIV/0! | 1 | #DIV/0! |
| H2-Ea-ps 14968       | -1 | #DIV/0! | 1 | #DIV/0! |
| Ssxb8 631002         | -1 | #DIV/0! | 1 | #DIV/0! |
| 4930590J08Rik 381798 | -1 | #DIV/0! | 1 | #DIV/0! |
| Plcd4 18802          | -1 | #DIV/0! | 1 | #DIV/0! |
| 4930468A15Rik 74987  | -1 | #DIV/0! | 1 | #DIV/0! |

|                     |    |         |   |         |
|---------------------|----|---------|---|---------|
| Cytc1 67407         | -1 | #DIV/0! | 1 | #DIV/0! |
| Tnfrsf8 21941       | -1 | #DIV/0! | 1 | #DIV/0! |
| Mir93 723885        | -1 | #DIV/0! | 1 | #DIV/0! |
| Vmn1r199 171247     | -1 | #DIV/0! | 1 | #DIV/0! |
| Banf2 403171        | -1 | #DIV/0! | 1 | #DIV/0! |
| Ky 16716            | -1 | #DIV/0! | 1 | #DIV/0! |
| 4933413G19Rik 71149 | -1 | #DIV/0! | 1 | #DIV/0! |
| Mir188 387183       | -1 | #DIV/0! | 1 | #DIV/0! |
| Olfr1223 258894     | -1 | #DIV/0! | 1 | #DIV/0! |
| Olfr1254 258468     | -1 | #DIV/0! | 1 | #DIV/0! |
| Dgki 320127         | -1 | #DIV/0! | 1 | #DIV/0! |
| Ap3b2 11775         | -1 | #DIV/0! | 1 | #DIV/0! |
| Gadl1 73748         | -1 | #DIV/0! | 1 | #DIV/0! |
| Adam29 244486       | -1 | #DIV/0! | 1 | #DIV/0! |
| Pou4f1 18996        | -1 | #DIV/0! | 1 | #DIV/0! |
| Defb39 360214       | -1 | #DIV/0! | 1 | #DIV/0! |
| Olfr1019 259017     | -1 | #DIV/0! | 1 | #DIV/0! |
| H1foo 171506        | -1 | #DIV/0! | 1 | #DIV/0! |
| Asb18 208372        | -1 | #DIV/0! | 1 | #DIV/0! |
| Olfr1404 258881     | -1 | #DIV/0! | 1 | #DIV/0! |
| Olfr1457 258568     | -1 | #DIV/0! | 1 | #DIV/0! |
| Rbmy1a1 19657       | -1 | #DIV/0! | 1 | #DIV/0! |
| Vmn1r180 232962     | -1 | #DIV/0! | 1 | #DIV/0! |
| Htr3a 15561         | -1 | #DIV/0! | 1 | #DIV/0! |
| Olfr960 258276      | -1 | #DIV/0! | 1 | #DIV/0! |
| Olfr536 258513      | -1 | #DIV/0! | 1 | #DIV/0! |
| Pebp4 73523         | -1 | #DIV/0! | 1 | #DIV/0! |
| Bnc1 12173          | -1 | #DIV/0! | 1 | #DIV/0! |
| Spdya 70891         | -1 | #DIV/0! | 1 | #DIV/0! |
| 4930511111Rik 67645 | -1 | #DIV/0! | 1 | #DIV/0! |
| Helt 234219         | -1 | #DIV/0! | 1 | #DIV/0! |
| Olfr1226 258969     | -1 | #DIV/0! | 1 | #DIV/0! |
| Enam 13801          | -1 | #DIV/0! | 1 | #DIV/0! |
| Kcna1 16485         | -1 | #DIV/0! | 1 | #DIV/0! |
| Art2b 11872         | -1 | #DIV/0! | 1 | #DIV/0! |
| Ifna9 15972         | -1 | #DIV/0! | 1 | #DIV/0! |
| Mir669h 100316831   | -1 | #DIV/0! | 1 | #DIV/0! |
| Ccl1 20290          | -1 | #DIV/0! | 1 | #DIV/0! |
| Gm8773 667705       | -1 | #DIV/0! | 1 | #DIV/0! |
| Snora2b 100217416   | -1 | #DIV/0! | 1 | #DIV/0! |
| Ephb1 270190        | -1 | #DIV/0! | 1 | #DIV/0! |
| Mir218-2 723924     | -1 | #DIV/0! | 1 | #DIV/0! |
| Olfr866 258551      | -1 | #DIV/0! | 1 | #DIV/0! |
| Mir382 723912       | -1 | #DIV/0! | 1 | #DIV/0! |
| Mir450b 751532      | -1 | #DIV/0! | 1 | #DIV/0! |
| Mir92b 100124470    | -1 | #DIV/0! | 1 | #DIV/0! |
| Gm5127 331493       | -1 | #DIV/0! | 1 | #DIV/0! |
| Npffr1 237362       | -1 | #DIV/0! | 1 | #DIV/0! |
| 4930503B20Rik 75015 | -1 | #DIV/0! | 1 | #DIV/0! |
| Olfr1133 258348     | -1 | #DIV/0! | 1 | #DIV/0! |
| Vmn1r67 171263      | -1 | #DIV/0! | 1 | #DIV/0! |
| Rdh8 235033         | -1 | #DIV/0! | 1 | #DIV/0! |
| Cntnap5a 636808     | -1 | #DIV/0! | 1 | #DIV/0! |

|                         |    |         |   |         |
|-------------------------|----|---------|---|---------|
| Olf1077-ps1 625853      | -1 | #DIV/0! | 1 | #DIV/0! |
| Olf827 258297           | -1 | #DIV/0! | 1 | #DIV/0! |
| Olf224 258198           | -1 | #DIV/0! | 1 | #DIV/0! |
| Btd17 72014             | -1 | #DIV/0! | 1 | #DIV/0! |
| 4930431A04Rik 100043861 | -1 | #DIV/0! | 1 | #DIV/0! |
| Olf1448 258696          | -1 | #DIV/0! | 1 | #DIV/0! |
| Gm5169 382277           | -1 | #DIV/0! | 1 | #DIV/0! |
| 4930544D05Rik 668433    | -1 | #DIV/0! | 1 | #DIV/0! |
| Nkx6-1 18096            | -1 | #DIV/0! | 1 | #DIV/0! |
| Hba-x 15126             | -1 | #DIV/0! | 1 | #DIV/0! |
| Grin3a 242443           | -1 | #DIV/0! | 1 | #DIV/0! |
| Nrip3 78593             | -1 | #DIV/0! | 1 | #DIV/0! |
| Muc15 269328            | -1 | #DIV/0! | 1 | #DIV/0! |
| Vmn1r89 171260          | -1 | #DIV/0! | 1 | #DIV/0! |
| Nr4a3 18124             | -1 | #DIV/0! | 1 | #DIV/0! |
| 1700108F19Rik 73272     | -1 | #DIV/0! | 1 | #DIV/0! |
| Amac1 56293             | -1 | #DIV/0! | 1 | #DIV/0! |
| Gm14744 628923          | -1 | #DIV/0! | 1 | #DIV/0! |
| Crisp2 22024            | -1 | #DIV/0! | 1 | #DIV/0! |
| Oxgr1 239283            | -1 | #DIV/0! | 1 | #DIV/0! |
| Scgn 214189             | -1 | #DIV/0! | 1 | #DIV/0! |
| Rit2 19762              | -1 | #DIV/0! | 1 | #DIV/0! |
| Gm6040 574083           | -1 | #DIV/0! | 1 | #DIV/0! |
| Prg3 53856              | -1 | #DIV/0! | 1 | #DIV/0! |
| Tsga8 100502723         | -1 | #DIV/0! | 1 | #DIV/0! |
| Dhrs2 71412             | -1 | #DIV/0! | 1 | #DIV/0! |
| Ctsr 56835              | -1 | #DIV/0! | 1 | #DIV/0! |
| Zfp382 233060           | -1 | #DIV/0! | 1 | #DIV/0! |
| Bglap-rs1 12095         | -1 | #DIV/0! | 1 | #DIV/0! |
| Olf1165-ps 258642       | -1 | #DIV/0! | 1 | #DIV/0! |
| Hes2 15206              | -1 | #DIV/0! | 1 | #DIV/0! |
| Mir146 387164           | -1 | #DIV/0! | 1 | #DIV/0! |
| Olf63 258939            | -1 | #DIV/0! | 1 | #DIV/0! |
| Olf876 258883           | -1 | #DIV/0! | 1 | #DIV/0! |
| Lmo1 109594             | -1 | #DIV/0! | 1 | #DIV/0! |
| Il2 16183               | -1 | #DIV/0! | 1 | #DIV/0! |
| Mir302d 723928          | -1 | #DIV/0! | 1 | #DIV/0! |
| Gm4302 100043227        | -1 | #DIV/0! | 1 | #DIV/0! |
| Olf155 29845            | -1 | #DIV/0! | 1 | #DIV/0! |
| Slc2a7 435818           | -1 | #DIV/0! | 1 | #DIV/0! |
| Olf67 18368             | -1 | #DIV/0! | 1 | #DIV/0! |
| Cdhr1 170677            | -1 | #DIV/0! | 1 | #DIV/0! |
| Olf325 258261           | -1 | #DIV/0! | 1 | #DIV/0! |
| Msx1as 93895            | -1 | #DIV/0! | 1 | #DIV/0! |
| Gm6614 625716           | -1 | #DIV/0! | 1 | #DIV/0! |
| Ctag2 70062             | -1 | #DIV/0! | 1 | #DIV/0! |
| Tpbpb 116913            | -1 | #DIV/0! | 1 | #DIV/0! |
| Defb14 244332           | -1 | #DIV/0! | 1 | #DIV/0! |
| Olf27 258826            | -1 | #DIV/0! | 1 | #DIV/0! |
| Vstm2b 58188            | -1 | #DIV/0! | 1 | #DIV/0! |
| Gjd4 225152             | -1 | #DIV/0! | 1 | #DIV/0! |
| Speer4f 70935           | -1 | #DIV/0! | 1 | #DIV/0! |
| Efcab5 319634           | -1 | #DIV/0! | 1 | #DIV/0! |

|                      |    |         |   |         |
|----------------------|----|---------|---|---------|
| Mir1936 100316812    | -1 | #DIV/0! | 1 | #DIV/0! |
| Ppp3r2 19059         | -1 | #DIV/0! | 1 | #DIV/0! |
| Olfr1242 258970      | -1 | #DIV/0! | 1 | #DIV/0! |
| Olfr532 259028       | -1 | #DIV/0! | 1 | #DIV/0! |
| 1700011I03Rik 75444  | -1 | #DIV/0! | 1 | #DIV/0! |
| 1700010M22Rik 66328  | -1 | #DIV/0! | 1 | #DIV/0! |
| Cyp2c53-ps 638988    | -1 | #DIV/0! | 1 | #DIV/0! |
| Zdhhc25 70073        | -1 | #DIV/0! | 1 | #DIV/0! |
| Prdm12 381359        | -1 | #DIV/0! | 1 | #DIV/0! |
| Olfr898 258871       | -1 | #DIV/0! | 1 | #DIV/0! |
| Them5 66198          | -1 | #DIV/0! | 1 | #DIV/0! |
| Defa22 382059        | -1 | #DIV/0! | 1 | #DIV/0! |
| Wnt10a 22409         | -1 | #DIV/0! | 1 | #DIV/0! |
| Krtap15 26560        | -1 | #DIV/0! | 1 | #DIV/0! |
| Olfr68 18369         | -1 | #DIV/0! | 1 | #DIV/0! |
| Vmn2r84 625068       | -1 | #DIV/0! | 1 | #DIV/0! |
| Avp 11998            | -1 | #DIV/0! | 1 | #DIV/0! |
| Atp13a5 268878       | -1 | #DIV/0! | 1 | #DIV/0! |
| Acsl6 216739         | -1 | #DIV/0! | 1 | #DIV/0! |
| Olfr1445 258694      | -1 | #DIV/0! | 1 | #DIV/0! |
| Krtap27-1 239933     | -1 | #DIV/0! | 1 | #DIV/0! |
| Mir1192 100316672    | -1 | #DIV/0! | 1 | #DIV/0! |
| Stk31 77485          | -1 | #DIV/0! | 1 | #DIV/0! |
| Lhx9 16876           | -1 | #DIV/0! | 1 | #DIV/0! |
| Gm11564 670496       | -1 | #DIV/0! | 1 | #DIV/0! |
| 4930429F11Rik 74622  | -1 | #DIV/0! | 1 | #DIV/0! |
| Olfr869 258550       | -1 | #DIV/0! | 1 | #DIV/0! |
| Cpa5 74649           | -1 | #DIV/0! | 1 | #DIV/0! |
| Odz1 23963           | -1 | #DIV/0! | 1 | #DIV/0! |
| Tex22 75671          | -1 | #DIV/0! | 1 | #DIV/0! |
| Adam34 252866        | -1 | #DIV/0! | 1 | #DIV/0! |
| 9530003J23Rik 77397  | -1 | #DIV/0! | 1 | #DIV/0! |
| Cuzd1 16433          | -1 | #DIV/0! | 1 | #DIV/0! |
| 4930562C15Rik 78809  | -1 | #DIV/0! | 1 | #DIV/0! |
| Asb12 70392          | -1 | #DIV/0! | 1 | #DIV/0! |
| 7530420F21Rik 320019 | -1 | #DIV/0! | 1 | #DIV/0! |
| Kcnj14 211480        | -1 | #DIV/0! | 1 | #DIV/0! |
| Tpbg 21983           | -1 | #DIV/0! | 1 | #DIV/0! |
| Olfr689 258745       | -1 | #DIV/0! | 1 | #DIV/0! |
| Scrg1 20284          | -1 | #DIV/0! | 1 | #DIV/0! |
| Scin 20259           | -1 | #DIV/0! | 1 | #DIV/0! |
| Olfr486 258489       | -1 | #DIV/0! | 1 | #DIV/0! |
| Rnu73b 19871         | -1 | #DIV/0! | 1 | #DIV/0! |
| Olfr555 259107       | -1 | #DIV/0! | 1 | #DIV/0! |
| Ptchd2 242748        | -1 | #DIV/0! | 1 | #DIV/0! |
| Fam159b 77803        | -1 | #DIV/0! | 1 | #DIV/0! |
| Olfr347 258945       | -1 | #DIV/0! | 1 | #DIV/0! |
| Olfr740 258661       | -1 | #DIV/0! | 1 | #DIV/0! |
| Gm13276 545649       | -1 | #DIV/0! | 1 | #DIV/0! |
| Olfr392 259008       | -1 | #DIV/0! | 1 | #DIV/0! |
| Mir370 723854        | -1 | #DIV/0! | 1 | #DIV/0! |
| Dusp9 75590          | -1 | #DIV/0! | 1 | #DIV/0! |
| Olfr286 629524       | -1 | #DIV/0! | 1 | #DIV/0! |

|                      |    |         |   |         |
|----------------------|----|---------|---|---------|
| 4921511M17Rik 667256 | -1 | #DIV/0! | 1 | #DIV/0! |
| Olfr1046 258575      | -1 | #DIV/0! | 1 | #DIV/0! |
| Smr3a 20599          | -1 | #DIV/0! | 1 | #DIV/0! |
| Foxo6 329934         | -1 | #DIV/0! | 1 | #DIV/0! |
| Olfr775 258538       | -1 | #DIV/0! | 1 | #DIV/0! |
| Dmrt1 50796          | -1 | #DIV/0! | 1 | #DIV/0! |
| Dnahc6 330355        | -1 | #DIV/0! | 1 | #DIV/0! |
| Mir99b 387230        | -1 | #DIV/0! | 1 | #DIV/0! |
| 6430704M03Rik 230235 | -1 | #DIV/0! | 1 | #DIV/0! |
| Calb2 12308          | -1 | #DIV/0! | 1 | #DIV/0! |
| Mir1904 100316683    | -1 | #DIV/0! | 1 | #DIV/0! |
| A630095E13Rik 235973 | -1 | #DIV/0! | 1 | #DIV/0! |
| Triml1 244448        | -1 | #DIV/0! | 1 | #DIV/0! |
| Sytl5 236643         | -1 | #DIV/0! | 1 | #DIV/0! |
| Nctc1 330677         | -1 | #DIV/0! | 1 | #DIV/0! |
| Vmn1r27 171206       | -1 | #DIV/0! | 1 | #DIV/0! |
| Olfr834 258074       | -1 | #DIV/0! | 1 | #DIV/0! |
| Gm949 381142         | -1 | #DIV/0! | 1 | #DIV/0! |
| Mir877 100124459     | -1 | #DIV/0! | 1 | #DIV/0! |
| Tmem27 57394         | -1 | #DIV/0! | 1 | #DIV/0! |
| Vmn1r95 100312475    | -1 | #DIV/0! | 1 | #DIV/0! |
| Htr7 15566           | -1 | #DIV/0! | 1 | #DIV/0! |
| Cela3b 67868         | -1 | #DIV/0! | 1 | #DIV/0! |
| Cdhr3 68764          | -1 | #DIV/0! | 1 | #DIV/0! |
| Hist1h2bn 319187     | -1 | #DIV/0! | 1 | #DIV/0! |
| 1700001J11Rik 72224  | -1 | #DIV/0! | 1 | #DIV/0! |
| Olfr519 277935       | -1 | #DIV/0! | 1 | #DIV/0! |
| Tmco5b 75275         | -1 | #DIV/0! | 1 | #DIV/0! |
| Mir3074-2 100526528  | -1 | #DIV/0! | 1 | #DIV/0! |
| Ptf1a 19213          | -1 | #DIV/0! | 1 | #DIV/0! |
| Samd12 320679        | -1 | #DIV/0! | 1 | #DIV/0! |
| Vmn2r86 625109       | -1 | #DIV/0! | 1 | #DIV/0! |
| Olfr1010 258255      | -1 | #DIV/0! | 1 | #DIV/0! |
| Gm14851 634825       | -1 | #DIV/0! | 1 | #DIV/0! |
| Snora16a 100310813   | -1 | #DIV/0! | 1 | #DIV/0! |
| Defb37 353320        | -1 | #DIV/0! | 1 | #DIV/0! |
| 4930528A17Rik 67735  | -1 | #DIV/0! | 1 | #DIV/0! |
| Lypd4 232973         | -1 | #DIV/0! | 1 | #DIV/0! |
| 9030224M15Rik 327747 | -1 | #DIV/0! | 1 | #DIV/0! |
| Serpib9d 20726       | -1 | #DIV/0! | 1 | #DIV/0! |
| Olfr1049 259018      | -1 | #DIV/0! | 1 | #DIV/0! |
| Uts2d 224065         | -1 | #DIV/0! | 1 | #DIV/0! |
| Ssxb10 385312        | -1 | #DIV/0! | 1 | #DIV/0! |
| Krt36 16673          | -1 | #DIV/0! | 1 | #DIV/0! |
| Chrm5 213788         | -1 | #DIV/0! | 1 | #DIV/0! |
| Dnajb3 15504         | -1 | #DIV/0! | 1 | #DIV/0! |
| Mageb1 17145         | -1 | #DIV/0! | 1 | #DIV/0! |
| Bpifa2e 19194        | -1 | #DIV/0! | 1 | #DIV/0! |
| Tdrd6 210510         | -1 | #DIV/0! | 1 | #DIV/0! |
| Klk1b9 13648         | -1 | #DIV/0! | 1 | #DIV/0! |
| Opn1sw 12057         | -1 | #DIV/0! | 1 | #DIV/0! |
| Prss45 260408        | -1 | #DIV/0! | 1 | #DIV/0! |
| Igf2as 111975        | -1 | #DIV/0! | 1 | #DIV/0! |

|                      |    |         |   |         |
|----------------------|----|---------|---|---------|
| Krt33b 16671         | -1 | #DIV/0! | 1 | #DIV/0! |
| Tmem179 104885       | -1 | #DIV/0! | 1 | #DIV/0! |
| Olfr107 258504       | -1 | #DIV/0! | 1 | #DIV/0! |
| Olfr13 18310         | -1 | #DIV/0! | 1 | #DIV/0! |
| Gm14346 668958       | -1 | #DIV/0! | 1 | #DIV/0! |
| Edn3 13616           | -1 | #DIV/0! | 1 | #DIV/0! |
| Vmn2r36 100042653    | -1 | #DIV/0! | 1 | #DIV/0! |
| Olfr986 258608       | -1 | #DIV/0! | 1 | #DIV/0! |
| Mmp16 17389          | -1 | #DIV/0! | 1 | #DIV/0! |
| Mir145 387163        | -1 | #DIV/0! | 1 | #DIV/0! |
| Mir709 735271        | -1 | #DIV/0! | 1 | #DIV/0! |
| Dkk4 234130          | -1 | #DIV/0! | 1 | #DIV/0! |
| Spink13 100038417    | -1 | #DIV/0! | 1 | #DIV/0! |
| Msemb 17695          | -1 | #DIV/0! | 1 | #DIV/0! |
| Slc5a4a 64452        | -1 | #DIV/0! | 1 | #DIV/0! |
| Asphd1 233879        | -1 | #DIV/0! | 1 | #DIV/0! |
| Vmn1r189 252906      | -1 | #DIV/0! | 1 | #DIV/0! |
| Kcne1 16509          | -1 | #DIV/0! | 1 | #DIV/0! |
| Mir3061 100526467    | -1 | #DIV/0! | 1 | #DIV/0! |
| Olfr1360 258536      | -1 | #DIV/0! | 1 | #DIV/0! |
| Olfr1085 258583      | -1 | #DIV/0! | 1 | #DIV/0! |
| Defa-rs7 13226       | -1 | #DIV/0! | 1 | #DIV/0! |
| 1700007I08Rik 70362  | -1 | #DIV/0! | 1 | #DIV/0! |
| Vmn2r20 667180       | -1 | #DIV/0! | 1 | #DIV/0! |
| Lrrc6 54562          | -1 | #DIV/0! | 1 | #DIV/0! |
| Olfr437 258293       | -1 | #DIV/0! | 1 | #DIV/0! |
| Kctd4 67516          | -1 | #DIV/0! | 1 | #DIV/0! |
| Klhl34 245683        | -1 | #DIV/0! | 1 | #DIV/0! |
| Bpifb6 228796        | -1 | #DIV/0! | 1 | #DIV/0! |
| Alpi 76768           | -1 | #DIV/0! | 1 | #DIV/0! |
| Clgn 12745           | -1 | #DIV/0! | 1 | #DIV/0! |
| Gm10863 100041655    | -1 | #DIV/0! | 1 | #DIV/0! |
| Gm13278 545651       | -1 | #DIV/0! | 1 | #DIV/0! |
| Olfr1197 433449      | -1 | #DIV/0! | 1 | #DIV/0! |
| Gm10391 100039293    | -1 | #DIV/0! | 1 | #DIV/0! |
| Olfr456 259144       | -1 | #DIV/0! | 1 | #DIV/0! |
| Slf3 20557           | -1 | #DIV/0! | 1 | #DIV/0! |
| Dbx2 223843          | -1 | #DIV/0! | 1 | #DIV/0! |
| Dach2 93837          | -1 | #DIV/0! | 1 | #DIV/0! |
| Obox2 246792         | -1 | #DIV/0! | 1 | #DIV/0! |
| 4732456N10Rik 239673 | -1 | #DIV/0! | 1 | #DIV/0! |
| Vmn2r97 627367       | -1 | #DIV/0! | 1 | #DIV/0! |
| Foxn1 15218          | -1 | #DIV/0! | 1 | #DIV/0! |
| Epyc 13516           | -1 | #DIV/0! | 1 | #DIV/0! |
| Gdap1l1 228858       | -1 | #DIV/0! | 1 | #DIV/0! |
| Nlrp9c 330490        | -1 | #DIV/0! | 1 | #DIV/0! |
| Olfr801 258282       | -1 | #DIV/0! | 1 | #DIV/0! |
| Olfr585 259091       | -1 | #DIV/0! | 1 | #DIV/0! |
| Olfr1298 258888      | -1 | #DIV/0! | 1 | #DIV/0! |
| Ccr4 12773           | -1 | #DIV/0! | 1 | #DIV/0! |
| Sstr5 20609          | -1 | #DIV/0! | 1 | #DIV/0! |
| Olfr231 404222       | -1 | #DIV/0! | 1 | #DIV/0! |
| Mir297b 735281       | -1 | #DIV/0! | 1 | #DIV/0! |

|                      |    |         |   |         |
|----------------------|----|---------|---|---------|
| Vmn1r51 22296        | -1 | #DIV/0! | 1 | #DIV/0! |
| Fbxw14 50757         | -1 | #DIV/0! | 1 | #DIV/0! |
| Trpc4 22066          | -1 | #DIV/0! | 1 | #DIV/0! |
| Nrl 18185            | -1 | #DIV/0! | 1 | #DIV/0! |
| Olfr1086 258585      | -1 | #DIV/0! | 1 | #DIV/0! |
| Mir489 723877        | -1 | #DIV/0! | 1 | #DIV/0! |
| Aurkc 20871          | -1 | #DIV/0! | 1 | #DIV/0! |
| Ugt8a 22239          | -1 | #DIV/0! | 1 | #DIV/0! |
| Foxf2 14238          | -1 | #DIV/0! | 1 | #DIV/0! |
| Olfr1062 259082      | -1 | #DIV/0! | 1 | #DIV/0! |
| Fbxo16 50759         | -1 | #DIV/0! | 1 | #DIV/0! |
| Lingo2 242384        | -1 | #DIV/0! | 1 | #DIV/0! |
| Olfr857 257963       | -1 | #DIV/0! | 1 | #DIV/0! |
| Dclk1 13175          | -1 | #DIV/0! | 1 | #DIV/0! |
| Hrh3 99296           | -1 | #DIV/0! | 1 | #DIV/0! |
| Lancl3 236285        | -1 | #DIV/0! | 1 | #DIV/0! |
| Gm16287 100038595    | -1 | #DIV/0! | 1 | #DIV/0! |
| Lypd5 76942          | -1 | #DIV/0! | 1 | #DIV/0! |
| Esx1 13984           | -1 | #DIV/0! | 1 | #DIV/0! |
| Olfr907 258801       | -1 | #DIV/0! | 1 | #DIV/0! |
| A630089N07Rik 320586 | -1 | #DIV/0! | 1 | #DIV/0! |
| Mir450-2 723938      | -1 | #DIV/0! | 1 | #DIV/0! |
| Vmn1r226 171225      | -1 | #DIV/0! | 1 | #DIV/0! |
| Mir377 723857        | -1 | #DIV/0! | 1 | #DIV/0! |
| Ms4a2 14126          | -1 | #DIV/0! | 1 | #DIV/0! |
| 4930563D23Rik 75328  | -1 | #DIV/0! | 1 | #DIV/0! |
| Olfr1058 258386      | -1 | #DIV/0! | 1 | #DIV/0! |
| Mir30a 387225        | -1 | #DIV/0! | 1 | #DIV/0! |
| Olfr554 258322       | -1 | #DIV/0! | 1 | #DIV/0! |
| Gm11202 790912       | -1 | #DIV/0! | 1 | #DIV/0! |
| Lypd6 320343         | -1 | #DIV/0! | 1 | #DIV/0! |
| Vmn2r46 100042894    | -1 | #DIV/0! | 1 | #DIV/0! |
| Mesp1 17292          | -1 | #DIV/0! | 1 | #DIV/0! |
| Olfr6 233670         | -1 | #DIV/0! | 1 | #DIV/0! |
| Olfr955 258242       | -1 | #DIV/0! | 1 | #DIV/0! |
| Cacna1e 12290        | -1 | #DIV/0! | 1 | #DIV/0! |
| Csf2 12981           | -1 | #DIV/0! | 1 | #DIV/0! |
| Sgcz 244431          | -1 | #DIV/0! | 1 | #DIV/0! |
| Mir335 723930        | -1 | #DIV/0! | 1 | #DIV/0! |
| Ddi1 71829           | -1 | #DIV/0! | 1 | #DIV/0! |
| Olfr395 259007       | -1 | #DIV/0! | 1 | #DIV/0! |
| Ttk 22137            | -1 | #DIV/0! | 1 | #DIV/0! |
| Olfr631 258961       | -1 | #DIV/0! | 1 | #DIV/0! |
| Vmn2r43 381838       | -1 | #DIV/0! | 1 | #DIV/0! |
| Hoxb9 15417          | -1 | #DIV/0! | 1 | #DIV/0! |
| Olfr329-ps 259148    | -1 | #DIV/0! | 1 | #DIV/0! |
| Nxf2 83454           | -1 | #DIV/0! | 1 | #DIV/0! |
| Pou1f1 18736         | -1 | #DIV/0! | 1 | #DIV/0! |
| Hoxa9 15405          | -1 | #DIV/0! | 1 | #DIV/0! |
| 2610021K21Rik 78767  | -1 | #DIV/0! | 1 | #DIV/0! |
| Olfr290 258411       | -1 | #DIV/0! | 1 | #DIV/0! |
| Vmn2r50 434117       | -1 | #DIV/0! | 1 | #DIV/0! |
| Mir677 751518        | -1 | #DIV/0! | 1 | #DIV/0! |



|                     |    |         |   |         |
|---------------------|----|---------|---|---------|
| Pth 19226           | -1 | #DIV/0! | 1 | #DIV/0! |
| Cdh29 320169        | -1 | #DIV/0! | 1 | #DIV/0! |
| AU019990 767814     | -1 | #DIV/0! | 1 | #DIV/0! |
| Gtsf1 74174         | -1 | #DIV/0! | 1 | #DIV/0! |
| Cst11 78240         | -1 | #DIV/0! | 1 | #DIV/0! |
| BC048507 408058     | -1 | #DIV/0! | 1 | #DIV/0! |
| Mir483 723874       | -1 | #DIV/0! | 1 | #DIV/0! |
| Vmn1r120 435953     | -1 | #DIV/0! | 1 | #DIV/0! |
| Tas2r106 387341     | -1 | #DIV/0! | 1 | #DIV/0! |
| Ctrc 76701          | -1 | #DIV/0! | 1 | #DIV/0! |
| Wfdc11 629761       | -1 | #DIV/0! | 1 | #DIV/0! |
| Krt81 64818         | -1 | #DIV/0! | 1 | #DIV/0! |
| Gmcl1 71847         | -1 | #DIV/0! | 1 | #DIV/0! |
| Mir449a 723868      | -1 | #DIV/0! | 1 | #DIV/0! |
| Gm17455 100302688   | -1 | #DIV/0! | 1 | #DIV/0! |
| Tph1 21990          | -1 | #DIV/0! | 1 | #DIV/0! |
| Gm15023 100040635   | -1 | #DIV/0! | 1 | #DIV/0! |
| Prss38 216797       | -1 | #DIV/0! | 1 | #DIV/0! |
| Rtp2 224055         | -1 | #DIV/0! | 1 | #DIV/0! |
| Olfr1462 258688     | -1 | #DIV/0! | 1 | #DIV/0! |
| Sval1 71578         | -1 | #DIV/0! | 1 | #DIV/0! |
| Defb21 403172       | -1 | #DIV/0! | 1 | #DIV/0! |
| Serpina1f 68348     | -1 | #DIV/0! | 1 | #DIV/0! |
| Col2a1 12824        | -1 | #DIV/0! | 1 | #DIV/0! |
| Spint3 629747       | -1 | #DIV/0! | 1 | #DIV/0! |
| Vmn1r10 113858      | -1 | #DIV/0! | 1 | #DIV/0! |
| Gm6084 619517       | -1 | #DIV/0! | 1 | #DIV/0! |
| Gprc6a 210198       | -1 | #DIV/0! | 1 | #DIV/0! |
| BC037032 414066     | -1 | #DIV/0! | 1 | #DIV/0! |
| Gm6300 622229       | -1 | #DIV/0! | 1 | #DIV/0! |
| Olfr1408 258759     | -1 | #DIV/0! | 1 | #DIV/0! |
| Mrgprb2 243979      | -1 | #DIV/0! | 1 | #DIV/0! |
| Gm9513 671003       | -1 | #DIV/0! | 1 | #DIV/0! |
| Vmn2r100 627537     | -1 | #DIV/0! | 1 | #DIV/0! |
| Pirt 193003         | -1 | #DIV/0! | 1 | #DIV/0! |
| Kcnf1 382571        | -1 | #DIV/0! | 1 | #DIV/0! |
| Lypd2 68311         | -1 | #DIV/0! | 1 | #DIV/0! |
| Olfr506 258215      | -1 | #DIV/0! | 1 | #DIV/0! |
| Olfr739 258663      | -1 | #DIV/0! | 1 | #DIV/0! |
| Adam1b 280667       | -1 | #DIV/0! | 1 | #DIV/0! |
| Kcnh6 192775        | -1 | #DIV/0! | 1 | #DIV/0! |
| Tubb1 545486        | -1 | #DIV/0! | 1 | #DIV/0! |
| Gm5132 333452       | -1 | #DIV/0! | 1 | #DIV/0! |
| Cyp11b2 13072       | -1 | #DIV/0! | 1 | #DIV/0! |
| Speer7-ps1 75858    | -1 | #DIV/0! | 1 | #DIV/0! |
| Mir224 723894       | -1 | #DIV/0! | 1 | #DIV/0! |
| Gm732 213450        | -1 | #DIV/0! | 1 | #DIV/0! |
| Olfr906 258799      | -1 | #DIV/0! | 1 | #DIV/0! |
| Vmn1r165 100043667  | -1 | #DIV/0! | 1 | #DIV/0! |
| Olfr340 258953      | -1 | #DIV/0! | 1 | #DIV/0! |
| 1700018F24Rik 69396 | -1 | #DIV/0! | 1 | #DIV/0! |
| P2rx1 18436         | -1 | #DIV/0! | 1 | #DIV/0! |
| Tmprss11bnl 319875  | -1 | #DIV/0! | 1 | #DIV/0! |

|                      |    |         |   |         |
|----------------------|----|---------|---|---------|
| 1700034F02Rik 73324  | -1 | #DIV/0! | 1 | #DIV/0! |
| Rtkn2 170799         | -1 | #DIV/0! | 1 | #DIV/0! |
| Olf584 259056        | -1 | #DIV/0! | 1 | #DIV/0! |
| V1ra8 113850         | -1 | #DIV/0! | 1 | #DIV/0! |
| Il12a 16159          | -1 | #DIV/0! | 1 | #DIV/0! |
| Pcdha5 12941         | -1 | #DIV/0! | 1 | #DIV/0! |
| Mir200a 387242       | -1 | #DIV/0! | 1 | #DIV/0! |
| Nipal4 214112        | -1 | #DIV/0! | 1 | #DIV/0! |
| Hoxd12 15432         | -1 | #DIV/0! | 1 | #DIV/0! |
| Fgf15 14170          | -1 | #DIV/0! | 1 | #DIV/0! |
| Gzmg 14944           | -1 | #DIV/0! | 1 | #DIV/0! |
| Tmem145 330485       | -1 | #DIV/0! | 1 | #DIV/0! |
| Gm14850 100041895    | -1 | #DIV/0! | 1 | #DIV/0! |
| Scgb3a1 68662        | -1 | #DIV/0! | 1 | #DIV/0! |
| Klhl14 225266        | -1 | #DIV/0! | 1 | #DIV/0! |
| Defb47 654465        | -1 | #DIV/0! | 1 | #DIV/0! |
| Vmn1r63 81017        | -1 | #DIV/0! | 1 | #DIV/0! |
| Gm15097 434869       | -1 | #DIV/0! | 1 | #DIV/0! |
| Gm10474 100038638    | -1 | #DIV/0! | 1 | #DIV/0! |
| 1700084C01Rik 78465  | -1 | #DIV/0! | 1 | #DIV/0! |
| 2810032G03Rik 72669  | -1 | #DIV/0! | 1 | #DIV/0! |
| Best3 382427         | -1 | #DIV/0! | 1 | #DIV/0! |
| Dscam 13508          | -1 | #DIV/0! | 1 | #DIV/0! |
| Gm5868 545758        | -1 | #DIV/0! | 1 | #DIV/0! |
| Gm17019 66773        | -1 | #DIV/0! | 1 | #DIV/0! |
| Snord66 100217430    | -1 | #DIV/0! | 1 | #DIV/0! |
| Ugt2a2 552899        | -1 | #DIV/0! | 1 | #DIV/0! |
| Prss44 73336         | -1 | #DIV/0! | 1 | #DIV/0! |
| Als2cr11 73463       | -1 | #DIV/0! | 1 | #DIV/0! |
| Cylc2 74914          | -1 | #DIV/0! | 1 | #DIV/0! |
| Snord71 100217432    | -1 | #DIV/0! | 1 | #DIV/0! |
| Vwa5b1 75718         | -1 | #DIV/0! | 1 | #DIV/0! |
| Krt16 16666          | -1 | #DIV/0! | 1 | #DIV/0! |
| Spink2 69982         | -1 | #DIV/0! | 1 | #DIV/0! |
| Sval3 387564         | -1 | #DIV/0! | 1 | #DIV/0! |
| BC049715 320135      | -1 | #DIV/0! | 1 | #DIV/0! |
| Serpib3d 394252      | -1 | #DIV/0! | 1 | #DIV/0! |
| Cdh8 12564           | -1 | #DIV/0! | 1 | #DIV/0! |
| Gzmc 14940           | -1 | #DIV/0! | 1 | #DIV/0! |
| Mael 98558           | -1 | #DIV/0! | 1 | #DIV/0! |
| Duoxa2 66811         | -1 | #DIV/0! | 1 | #DIV/0! |
| 2700046A07Rik 78449  | -1 | #DIV/0! | 1 | #DIV/0! |
| Dbpht2 386753        | -1 | #DIV/0! | 1 | #DIV/0! |
| Olf74 117005         | -1 | #DIV/0! | 1 | #DIV/0! |
| 5330413P13Rik 414081 | -1 | #DIV/0! | 1 | #DIV/0! |
| 1700026J04Rik 71864  | -1 | #DIV/0! | 1 | #DIV/0! |
| Crabp1 12903         | -1 | #DIV/0! | 1 | #DIV/0! |
| Klk15 317652         | -1 | #DIV/0! | 1 | #DIV/0! |
| Slc7a13 74087        | -1 | #DIV/0! | 1 | #DIV/0! |
| 4930529F22Rik 384806 | -1 | #DIV/0! | 1 | #DIV/0! |
| Klri1 503550         | -1 | #DIV/0! | 1 | #DIV/0! |
| Fshr 14309           | -1 | #DIV/0! | 1 | #DIV/0! |
| Olf728 258039        | -1 | #DIV/0! | 1 | #DIV/0! |

|                      |    |         |   |         |
|----------------------|----|---------|---|---------|
| Hs6st2 50786         | -1 | #DIV/0! | 1 | #DIV/0! |
| Sohlh1 227631        | -1 | #DIV/0! | 1 | #DIV/0! |
| Grm4 268934          | -1 | #DIV/0! | 1 | #DIV/0! |
| Tas2r102 387339      | -1 | #DIV/0! | 1 | #DIV/0! |
| Gm4934 238662        | -1 | #DIV/0! | 1 | #DIV/0! |
| Gm609 208166         | -1 | #DIV/0! | 1 | #DIV/0! |
| Olfr1414 259041      | -1 | #DIV/0! | 1 | #DIV/0! |
| Olfr787 258069       | -1 | #DIV/0! | 1 | #DIV/0! |
| Mir129-1 387237      | -1 | #DIV/0! | 1 | #DIV/0! |
| Olfr1251 259145      | -1 | #DIV/0! | 1 | #DIV/0! |
| Folh1 53320          | -1 | #DIV/0! | 1 | #DIV/0! |
| Olfr355 258618       | -1 | #DIV/0! | 1 | #DIV/0! |
| Cysltr1 58861        | -1 | #DIV/0! | 1 | #DIV/0! |
| Zfp286 192651        | -1 | #DIV/0! | 1 | #DIV/0! |
| Mir1897 100316679    | -1 | #DIV/0! | 1 | #DIV/0! |
| Snord16a 100217453   | -1 | #DIV/0! | 1 | #DIV/0! |
| Sh3rf2 269016        | -1 | #DIV/0! | 1 | #DIV/0! |
| Olfr1287 257935      | -1 | #DIV/0! | 1 | #DIV/0! |
| Apobec2 11811        | -1 | #DIV/0! | 1 | #DIV/0! |
| Mir881 100124460     | -1 | #DIV/0! | 1 | #DIV/0! |
| Olfr320 216783       | -1 | #DIV/0! | 1 | #DIV/0! |
| Scarna9 100216535    | -1 | #DIV/0! | 1 | #DIV/0! |
| Olfr1344 257882      | -1 | #DIV/0! | 1 | #DIV/0! |
| Vmn1r110 100043561   | -1 | #DIV/0! | 1 | #DIV/0! |
| Krt24 75706          | -1 | #DIV/0! | 1 | #DIV/0! |
| Mir1251 100526517    | -1 | #DIV/0! | 1 | #DIV/0! |
| Olfr1015 258564      | -1 | #DIV/0! | 1 | #DIV/0! |
| Vwc2 320460          | -1 | #DIV/0! | 1 | #DIV/0! |
| Gpr165 76206         | -1 | #DIV/0! | 1 | #DIV/0! |
| Vmn1r91 667067       | -1 | #DIV/0! | 1 | #DIV/0! |
| E030025P04Rik 268498 | -1 | #DIV/0! | 1 | #DIV/0! |
| Mir290 100049710     | -1 | #DIV/0! | 1 | #DIV/0! |
| Epha10 230735        | -1 | #DIV/0! | 1 | #DIV/0! |
| Olfr1221 258904      | -1 | #DIV/0! | 1 | #DIV/0! |
| Olfr1321 236785      | -1 | #DIV/0! | 1 | #DIV/0! |
| Mapk10 26414         | -1 | #DIV/0! | 1 | #DIV/0! |
| Zmat4 320158         | -1 | #DIV/0! | 1 | #DIV/0! |
| 4933416C03Rik 619332 | -1 | #DIV/0! | 1 | #DIV/0! |
| Gm4214 100043079     | -1 | #DIV/0! | 1 | #DIV/0! |
| Gm3867 100042485     | -1 | #DIV/0! | 1 | #DIV/0! |
| Olfr102 258218       | -1 | #DIV/0! | 1 | #DIV/0! |
| Vmn2r8 627479        | -1 | #DIV/0! | 1 | #DIV/0! |
| Lrriq4 68307         | -1 | #DIV/0! | 1 | #DIV/0! |
| Lct 226413           | -1 | #DIV/0! | 1 | #DIV/0! |
| Snora15 100113364    | -1 | #DIV/0! | 1 | #DIV/0! |
| Olfr179 404346       | -1 | #DIV/0! | 1 | #DIV/0! |
| Lce1g 66195          | -1 | #DIV/0! | 1 | #DIV/0! |
| Trpm3 226025         | -1 | #DIV/0! | 1 | #DIV/0! |
| Grid2 14804          | -1 | #DIV/0! | 1 | #DIV/0! |
| D730001G18Rik 78725  | -1 | #DIV/0! | 1 | #DIV/0! |
| 2210409E12Rik 72381  | -1 | #DIV/0! | 1 | #DIV/0! |
| Olfr1065 258403      | -1 | #DIV/0! | 1 | #DIV/0! |
| Snora36b 100217449   | -1 | #DIV/0! | 1 | #DIV/0! |

|                      |    |         |   |         |
|----------------------|----|---------|---|---------|
| Gm7849 665927        | -1 | #DIV/0! | 1 | #DIV/0! |
| Olfr1196 258456      | -1 | #DIV/0! | 1 | #DIV/0! |
| Tas2r117 353166      | -1 | #DIV/0! | 1 | #DIV/0! |
| C330024D21Rik 320479 | -1 | #DIV/0! | 1 | #DIV/0! |
| Olfr543 257947       | -1 | #DIV/0! | 1 | #DIV/0! |
| Mir2145-2 100316733  | -1 | #DIV/0! | 1 | #DIV/0! |
| Gm5800 545047        | -1 | #DIV/0! | 1 | #DIV/0! |
| Al414108 102623      | -1 | #DIV/0! | 1 | #DIV/0! |
| 1700011A15Rik 66322  | -1 | #DIV/0! | 1 | #DIV/0! |
| Nalcn 338370         | -1 | #DIV/0! | 1 | #DIV/0! |
| Scnn1b 20277         | -1 | #DIV/0! | 1 | #DIV/0! |
| Olfr111 545205       | -1 | #DIV/0! | 1 | #DIV/0! |
| Olfr899 258472       | -1 | #DIV/0! | 1 | #DIV/0! |
| Anks1b 77531         | -1 | #DIV/0! | 1 | #DIV/0! |
| 4921510H08Rik 66716  | -1 | #DIV/0! | 1 | #DIV/0! |
| Gm10754 100038699    | -1 | #DIV/0! | 1 | #DIV/0! |
| 1700010B08Rik 75485  | -1 | #DIV/0! | 1 | #DIV/0! |
| Nphs2 170484         | -1 | #DIV/0! | 1 | #DIV/0! |
| Vmn2r72-ps 244114    | -1 | #DIV/0! | 1 | #DIV/0! |
| Myf6 17878           | -1 | #DIV/0! | 1 | #DIV/0! |
| Chrna6 11440         | -1 | #DIV/0! | 1 | #DIV/0! |
| Gm5039 266459        | -1 | #DIV/0! | 1 | #DIV/0! |
| Prss43 272643        | -1 | #DIV/0! | 1 | #DIV/0! |
| Mir343 100124438     | -1 | #DIV/0! | 1 | #DIV/0! |
| Slc15a1 56643        | -1 | #DIV/0! | 1 | #DIV/0! |
| Morc2b 240069        | -1 | #DIV/0! | 1 | #DIV/0! |
| Rhox4g 664608        | -1 | #DIV/0! | 1 | #DIV/0! |
| 1700125D06Rik 68233  | -1 | #DIV/0! | 1 | #DIV/0! |
| Ccdc110 212392       | -1 | #DIV/0! | 1 | #DIV/0! |
| Olfr1099 258764      | -1 | #DIV/0! | 1 | #DIV/0! |
| Vmn1r222 171274      | -1 | #DIV/0! | 1 | #DIV/0! |
| Snora52 100217419    | -1 | #DIV/0! | 1 | #DIV/0! |
| Krtap16-2 170657     | -1 | #DIV/0! | 1 | #DIV/0! |
| Lhx8 16875           | -1 | #DIV/0! | 1 | #DIV/0! |
| Olfr104-ps 257948    | -1 | #DIV/0! | 1 | #DIV/0! |
| En2 13799            | -1 | #DIV/0! | 1 | #DIV/0! |
| Hus1b 210554         | -1 | #DIV/0! | 1 | #DIV/0! |
| Lpo 76113            | -1 | #DIV/0! | 1 | #DIV/0! |
| Olfr1424 258676      | -1 | #DIV/0! | 1 | #DIV/0! |
| Mir3064 100526469    | -1 | #DIV/0! | 1 | #DIV/0! |
| Icam5 15898          | -1 | #DIV/0! | 1 | #DIV/0! |
| Ovch2 244199         | -1 | #DIV/0! | 1 | #DIV/0! |
| Pof1b 69693          | -1 | #DIV/0! | 1 | #DIV/0! |
| Snord69 100217431    | -1 | #DIV/0! | 1 | #DIV/0! |
| Tas2r115 353325      | -1 | #DIV/0! | 1 | #DIV/0! |
| Pglyrp4 384997       | -1 | #DIV/0! | 1 | #DIV/0! |
| Olfr1500 258097      | -1 | #DIV/0! | 1 | #DIV/0! |
| Negr1 320840         | -1 | #DIV/0! | 1 | #DIV/0! |
| Gm13125 627009       | -1 | #DIV/0! | 1 | #DIV/0! |
| Mir669j 100316770    | -1 | #DIV/0! | 1 | #DIV/0! |
| Olfr716 258597       | -1 | #DIV/0! | 1 | #DIV/0! |
| Tas2r143 387514      | -1 | #DIV/0! | 1 | #DIV/0! |
| Gpr151 240239        | -1 | #DIV/0! | 1 | #DIV/0! |

|                         |    |         |   |         |
|-------------------------|----|---------|---|---------|
| Olfr190 258392          | -1 | #DIV/0! | 1 | #DIV/0! |
| Scg5 20394              | -1 | #DIV/0! | 1 | #DIV/0! |
| Spata20 217116          | -1 | #DIV/0! | 1 | #DIV/0! |
| 1700027A23Rik 100503311 | -1 | #DIV/0! | 1 | #DIV/0! |
| Ppp1r2-ps7 76705        | -1 | #DIV/0! | 1 | #DIV/0! |
| Kcnk7 16530             | -1 | #DIV/0! | 1 | #DIV/0! |
| Ccdc70 67929            | -1 | #DIV/0! | 1 | #DIV/0! |
| Iqcj 208426             | -1 | #DIV/0! | 1 | #DIV/0! |
| Hist1h3g 97908          | -1 | #DIV/0! | 1 | #DIV/0! |
| Mir7-1 723902           | -1 | #DIV/0! | 1 | #DIV/0! |
| Olfr661 258743          | -1 | #DIV/0! | 1 | #DIV/0! |
| Stra6 20897             | -1 | #DIV/0! | 1 | #DIV/0! |
| Gabra6 14399            | -1 | #DIV/0! | 1 | #DIV/0! |
| Slc17a7 72961           | -1 | #DIV/0! | 1 | #DIV/0! |
| Gpc5 103978             | -1 | #DIV/0! | 1 | #DIV/0! |
| Olfr293 257906          | -1 | #DIV/0! | 1 | #DIV/0! |
| Gm8096 666422           | -1 | #DIV/0! | 1 | #DIV/0! |
| 4933430I17Rik 214106    | -1 | #DIV/0! | 1 | #DIV/0! |
| Dcst1 77772             | -1 | #DIV/0! | 1 | #DIV/0! |
| Tinag 26944             | -1 | #DIV/0! | 1 | #DIV/0! |
| Evx1 14028              | -1 | #DIV/0! | 1 | #DIV/0! |
| Ankk1 244859            | -1 | #DIV/0! | 1 | #DIV/0! |
| Unc5d 210801            | -1 | #DIV/0! | 1 | #DIV/0! |
| Mir1903 100316680       | -1 | #DIV/0! | 1 | #DIV/0! |
| Olfr1106 258747         | -1 | #DIV/0! | 1 | #DIV/0! |
| Mir883a 100124462       | -1 | #DIV/0! | 1 | #DIV/0! |
| Troap 78733             | -1 | #DIV/0! | 1 | #DIV/0! |
| Krtap9-5 435286         | -1 | #DIV/0! | 1 | #DIV/0! |
| Ano3 228432             | -1 | #DIV/0! | 1 | #DIV/0! |
| Mir541 723941           | -1 | #DIV/0! | 1 | #DIV/0! |
| A730018C14Rik 100504733 | -1 | #DIV/0! | 1 | #DIV/0! |
| Col10a1 12813           | -1 | #DIV/0! | 1 | #DIV/0! |
| 1700010D01Rik 76386     | -1 | #DIV/0! | 1 | #DIV/0! |
| Resp18 19711            | -1 | #DIV/0! | 1 | #DIV/0! |
| Mir298 723832           | -1 | #DIV/0! | 1 | #DIV/0! |
| Mro 71263               | -1 | #DIV/0! | 1 | #DIV/0! |
| Lhx4 16872              | -1 | #DIV/0! | 1 | #DIV/0! |
| Vmn1r185 171265         | -1 | #DIV/0! | 1 | #DIV/0! |
| Myf5 17877              | -1 | #DIV/0! | 1 | #DIV/0! |
| Vmn2r61 637873          | -1 | #DIV/0! | 1 | #DIV/0! |
| Defb30 73670            | -1 | #DIV/0! | 1 | #DIV/0! |
| 1700003H04Rik 384775    | -1 | #DIV/0! | 1 | #DIV/0! |
| Hist1h4m 100041230      | -1 | #DIV/0! | 1 | #DIV/0! |
| Skint3 195564           | -1 | #DIV/0! | 1 | #DIV/0! |
| Ifne 230405             | -1 | #DIV/0! | 1 | #DIV/0! |
| Speer4a 75657           | -1 | #DIV/0! | 1 | #DIV/0! |
| 4932414J04Rik 237694    | -1 | #DIV/0! | 1 | #DIV/0! |
| Olfr48 18347            | -1 | #DIV/0! | 1 | #DIV/0! |
| Ankrd34a 545554         | -1 | #DIV/0! | 1 | #DIV/0! |
| Gm4847 226604           | -1 | #DIV/0! | 1 | #DIV/0! |
| Olfr119 258095          | -1 | #DIV/0! | 1 | #DIV/0! |
| Spink12 78242           | -1 | #DIV/0! | 1 | #DIV/0! |
| Spata19 75469           | -1 | #DIV/0! | 1 | #DIV/0! |

|                      |    |         |   |         |
|----------------------|----|---------|---|---------|
| Spata9 75571         | -1 | #DIV/0! | 1 | #DIV/0! |
| Taar7f 435207        | -1 | #DIV/0! | 1 | #DIV/0! |
| Olfr393 259010       | -1 | #DIV/0! | 1 | #DIV/0! |
| Samd5 320825         | -1 | #DIV/0! | 1 | #DIV/0! |
| Olfr1454 258687      | -1 | #DIV/0! | 1 | #DIV/0! |
| Adad2 75773          | -1 | #DIV/0! | 1 | #DIV/0! |
| 1700030F18Rik 72277  | -1 | #DIV/0! | 1 | #DIV/0! |
| Olfr193 257972       | -1 | #DIV/0! | 1 | #DIV/0! |
| Pcdhga11 93723       | -1 | #DIV/0! | 1 | #DIV/0! |
| Btbd16 330660        | -1 | #DIV/0! | 1 | #DIV/0! |
| Fthl17 83457         | -1 | #DIV/0! | 1 | #DIV/0! |
| Olfr685 258160       | -1 | #DIV/0! | 1 | #DIV/0! |
| Osbpl6 99031         | -1 | #DIV/0! | 1 | #DIV/0! |
| Tmem132c 208213      | -1 | #DIV/0! | 1 | #DIV/0! |
| Olfr1141 258630      | -1 | #DIV/0! | 1 | #DIV/0! |
| Mir383 723860        | -1 | #DIV/0! | 1 | #DIV/0! |
| Tubal3 238463        | -1 | #DIV/0! | 1 | #DIV/0! |
| Olfr745 258296       | -1 | #DIV/0! | 1 | #DIV/0! |
| Mir190b 100124481    | -1 | #DIV/0! | 1 | #DIV/0! |
| Olfr1008 258866      | -1 | #DIV/0! | 1 | #DIV/0! |
| Rnf207 433809        | -1 | #DIV/0! | 1 | #DIV/0! |
| Mirlet7a-1 387244    | -1 | #DIV/0! | 1 | #DIV/0! |
| Gkn3 68888           | -1 | #DIV/0! | 1 | #DIV/0! |
| Olfr94 258219        | -1 | #DIV/0! | 1 | #DIV/0! |
| 2410017I17Rik 675325 | -1 | #DIV/0! | 1 | #DIV/0! |
| Hist1h2ab 319172     | -1 | #DIV/0! | 1 | #DIV/0! |
| Psg22 243862         | -1 | #DIV/0! | 1 | #DIV/0! |
| Olfr895 258875       | -1 | #DIV/0! | 1 | #DIV/0! |
| 1700013G24Rik 69380  | -1 | #DIV/0! | 1 | #DIV/0! |
| Ldhal6b 106557       | -1 | #DIV/0! | 1 | #DIV/0! |
| 5031410I06Rik 381622 | -1 | #DIV/0! | 1 | #DIV/0! |
| Galntl6 270049       | -1 | #DIV/0! | 1 | #DIV/0! |
| Olfr292 258613       | -1 | #DIV/0! | 1 | #DIV/0! |
| Olfr818 258773       | -1 | #DIV/0! | 1 | #DIV/0! |
| Gm1661 381544        | -1 | #DIV/0! | 1 | #DIV/0! |
| Vgll1 170828         | -1 | #DIV/0! | 1 | #DIV/0! |
| Mir138-2 723956      | -1 | #DIV/0! | 1 | #DIV/0! |
| Serpina3j 238395     | -1 | #DIV/0! | 1 | #DIV/0! |
| Myh8 17885           | -1 | #DIV/0! | 1 | #DIV/0! |
| Olfr1218 258815      | -1 | #DIV/0! | 1 | #DIV/0! |
| Gm13128 626995       | -1 | #DIV/0! | 1 | #DIV/0! |
| Pax8 18510           | -1 | #DIV/0! | 1 | #DIV/0! |
| Slc6a19 74338        | -1 | #DIV/0! | 1 | #DIV/0! |
| 2900079G21Rik 620760 | -1 | #DIV/0! | 1 | #DIV/0! |
| Gm17677 100312949    | -1 | #DIV/0! | 1 | #DIV/0! |
| Gm17365 100312956    | -1 | #DIV/0! | 1 | #DIV/0! |
| 2210407C18Rik 78354  | -1 | #DIV/0! | 1 | #DIV/0! |
| Olfr401 258701       | -1 | #DIV/0! | 1 | #DIV/0! |
| Cnga1 12788          | -1 | #DIV/0! | 1 | #DIV/0! |
| Zfp474 66758         | -1 | #DIV/0! | 1 | #DIV/0! |
| Mir540 723880        | -1 | #DIV/0! | 1 | #DIV/0! |
| Gm4861 229862        | -1 | #DIV/0! | 1 | #DIV/0! |
| Mgat5b 268510        | -1 | #DIV/0! | 1 | #DIV/0! |

|                      |    |         |   |         |
|----------------------|----|---------|---|---------|
| Mir467a-7 100526553  | -1 | #DIV/0! | 1 | #DIV/0! |
| Olfr1288 258395      | -1 | #DIV/0! | 1 | #DIV/0! |
| Lefty2 320202        | -1 | #DIV/0! | 1 | #DIV/0! |
| Snord49a 100217455   | -1 | #DIV/0! | 1 | #DIV/0! |
| Vmn1r218 171256      | -1 | #DIV/0! | 1 | #DIV/0! |
| Olfr1257 258984      | -1 | #DIV/0! | 1 | #DIV/0! |
| Spata3 70060         | -1 | #DIV/0! | 1 | #DIV/0! |
| Nefl 18039           | -1 | #DIV/0! | 1 | #DIV/0! |
| Olfr711 259037       | -1 | #DIV/0! | 1 | #DIV/0! |
| Gm12603 100040617    | -1 | #DIV/0! | 1 | #DIV/0! |
| Mir341 723846        | -1 | #DIV/0! | 1 | #DIV/0! |
| Lrrc52 240899        | -1 | #DIV/0! | 1 | #DIV/0! |
| 1700052I22Rik 67340  | -1 | #DIV/0! | 1 | #DIV/0! |
| E130304I02Rik 78547  | -1 | #DIV/0! | 1 | #DIV/0! |
| 1700011L22Rik 67687  | -1 | #DIV/0! | 1 | #DIV/0! |
| Krt76 77055          | -1 | #DIV/0! | 1 | #DIV/0! |
| Hist1h2bg 319181     | -1 | #DIV/0! | 1 | #DIV/0! |
| Vmn2r1 56544         | -1 | #DIV/0! | 1 | #DIV/0! |
| Olfr871 258905       | -1 | #DIV/0! | 1 | #DIV/0! |
| Gje1 76743           | -1 | #DIV/0! | 1 | #DIV/0! |
| Dmrtc1c1 71083       | -1 | #DIV/0! | 1 | #DIV/0! |
| Calm5 494124         | -1 | #DIV/0! | 1 | #DIV/0! |
| AY761185 503556      | -1 | #DIV/0! | 1 | #DIV/0! |
| Csrnp3 77771         | -1 | #DIV/0! | 1 | #DIV/0! |
| Uty 22290            | -1 | #DIV/0! | 1 | #DIV/0! |
| Tgm7 640543          | -1 | #DIV/0! | 1 | #DIV/0! |
| Vmn1r210 171269      | -1 | #DIV/0! | 1 | #DIV/0! |
| D430041D05Rik 241589 | -1 | #DIV/0! | 1 | #DIV/0! |
| Vmn2r79 621430       | -1 | #DIV/0! | 1 | #DIV/0! |
| Mep1b 17288          | -1 | #DIV/0! | 1 | #DIV/0! |
| 2310002L09Rik 71886  | -1 | #DIV/0! | 1 | #DIV/0! |
| Neu4 241159          | -1 | #DIV/0! | 1 | #DIV/0! |
| Pnma2 239157         | -1 | #DIV/0! | 1 | #DIV/0! |
| Coro6 216961         | -1 | #DIV/0! | 1 | #DIV/0! |
| Cyp2c65 72303        | -1 | #DIV/0! | 1 | #DIV/0! |
| Cdx2 12591           | -1 | #DIV/0! | 1 | #DIV/0! |
| Krt1 16678           | -1 | #DIV/0! | 1 | #DIV/0! |
| Mmp1b 83996          | -1 | #DIV/0! | 1 | #DIV/0! |
| 1700071K01Rik 237880 | -1 | #DIV/0! | 1 | #DIV/0! |
| Mir10a 723893        | -1 | #DIV/0! | 1 | #DIV/0! |
| Kcng1 241794         | -1 | #DIV/0! | 1 | #DIV/0! |
| Lao1 100470          | -1 | #DIV/0! | 1 | #DIV/0! |
| 5530400C23Rik 232426 | -1 | #DIV/0! | 1 | #DIV/0! |
| Gpr1 241070          | -1 | #DIV/0! | 1 | #DIV/0! |
| Gm10334 100040233    | -1 | #DIV/0! | 1 | #DIV/0! |
| Cldn26 74720         | -1 | #DIV/0! | 1 | #DIV/0! |
| Cetn4 207175         | -1 | #DIV/0! | 1 | #DIV/0! |
| Olfr560 259117       | -1 | #DIV/0! | 1 | #DIV/0! |
| Ppef1 237178         | -1 | #DIV/0! | 1 | #DIV/0! |
| Camkv 235604         | -1 | #DIV/0! | 1 | #DIV/0! |
| Sprr2e 20759         | -1 | #DIV/0! | 1 | #DIV/0! |
| Olfr952 235248       | -1 | #DIV/0! | 1 | #DIV/0! |
| Ttc18 76670          | -1 | #DIV/0! | 1 | #DIV/0! |

|                         |    |         |   |         |
|-------------------------|----|---------|---|---------|
| Gm749 328788            | -1 | #DIV/0! | 1 | #DIV/0! |
| Ly6k 76486              | -1 | #DIV/0! | 1 | #DIV/0! |
| Tfap2d 226896           | -1 | #DIV/0! | 1 | #DIV/0! |
| Slc22a8 19879           | -1 | #DIV/0! | 1 | #DIV/0! |
| Mir124a-3 723951        | -1 | #DIV/0! | 1 | #DIV/0! |
| 2200002J24Rik 69147     | -1 | #DIV/0! | 1 | #DIV/0! |
| Olfr750 404319          | -1 | #DIV/0! | 1 | #DIV/0! |
| Olfr141 257913          | -1 | #DIV/0! | 1 | #DIV/0! |
| A330050F15Rik 320722    | -1 | #DIV/0! | 1 | #DIV/0! |
| Eps8l3 99662            | -1 | #DIV/0! | 1 | #DIV/0! |
| Olfr936 628171          | -1 | #DIV/0! | 1 | #DIV/0! |
| Tmem117 320709          | -1 | #DIV/0! | 1 | #DIV/0! |
| Cetn1 26369             | -1 | #DIV/0! | 1 | #DIV/0! |
| Odam 69592              | -1 | #DIV/0! | 1 | #DIV/0! |
| Cypt15 78631            | -1 | #DIV/0! | 1 | #DIV/0! |
| Btnl7 195349            | -1 | #DIV/0! | 1 | #DIV/0! |
| Olfr806 258546          | -1 | #DIV/0! | 1 | #DIV/0! |
| Olfr957 258740          | -1 | #DIV/0! | 1 | #DIV/0! |
| Dcpp1 13184             | -1 | #DIV/0! | 1 | #DIV/0! |
| 1700007K09Rik 69318     | -1 | #DIV/0! | 1 | #DIV/0! |
| Olfr9 18373             | -1 | #DIV/0! | 1 | #DIV/0! |
| Trdn 76757              | -1 | #DIV/0! | 1 | #DIV/0! |
| Olfr1054 259021         | -1 | #DIV/0! | 1 | #DIV/0! |
| Olfr1279 258388         | -1 | #DIV/0! | 1 | #DIV/0! |
| Gm11596 670464          | -1 | #DIV/0! | 1 | #DIV/0! |
| Gm5577 434064           | -1 | #DIV/0! | 1 | #DIV/0! |
| Olfr1152 258103         | -1 | #DIV/0! | 1 | #DIV/0! |
| Olfr204 258994          | -1 | #DIV/0! | 1 | #DIV/0! |
| Olfr1395 258877         | -1 | #DIV/0! | 1 | #DIV/0! |
| Tmc1 13409              | -1 | #DIV/0! | 1 | #DIV/0! |
| Rnf17 30054             | -1 | #DIV/0! | 1 | #DIV/0! |
| Mir344f 100526527       | -1 | #DIV/0! | 1 | #DIV/0! |
| Plekhg4 102075          | -1 | #DIV/0! | 1 | #DIV/0! |
| Slxl1 75140             | -1 | #DIV/0! | 1 | #DIV/0! |
| Tcl1b5 27382            | -1 | #DIV/0! | 1 | #DIV/0! |
| Snord85 100217460       | -1 | #DIV/0! | 1 | #DIV/0! |
| Pcsk1n 30052            | -1 | #DIV/0! | 1 | #DIV/0! |
| Xirp2 241431            | -1 | #DIV/0! | 1 | #DIV/0! |
| Vrtn 432677             | -1 | #DIV/0! | 1 | #DIV/0! |
| Gm839 330379            | -1 | #DIV/0! | 1 | #DIV/0! |
| Rnase12 497106          | -1 | #DIV/0! | 1 | #DIV/0! |
| 7420461P10Rik 100038657 | -1 | #DIV/0! | 1 | #DIV/0! |
| 4930412O13Rik 381347    | -1 | #DIV/0! | 1 | #DIV/0! |
| 40978 632687            | -1 | #DIV/0! | 1 | #DIV/0! |
| Heph1l 244698           | -1 | #DIV/0! | 1 | #DIV/0! |
| Insrr 23920             | -1 | #DIV/0! | 1 | #DIV/0! |
| Vmn1r216 171279         | -1 | #DIV/0! | 1 | #DIV/0! |
| Odf3l1 382075           | -1 | #DIV/0! | 1 | #DIV/0! |
| Vmn1r103 667129         | -1 | #DIV/0! | 1 | #DIV/0! |
| Tuba3a 22144            | -1 | #DIV/0! | 1 | #DIV/0! |
| Mir136 387154           | -1 | #DIV/0! | 1 | #DIV/0! |
| Gm8720 667599           | -1 | #DIV/0! | 1 | #DIV/0! |
| Dynlrb2 75465           | -1 | #DIV/0! | 1 | #DIV/0! |



|                      |    |         |   |         |
|----------------------|----|---------|---|---------|
| A330050B17Rik 654424 | -1 | #DIV/0! | 1 | #DIV/0! |
| Cst10 58214          | -1 | #DIV/0! | 1 | #DIV/0! |
| Gsdmc2 331063        | -1 | #DIV/0! | 1 | #DIV/0! |
| Svs5 20944           | -1 | #DIV/0! | 1 | #DIV/0! |
| Odf1 18285           | -1 | #DIV/0! | 1 | #DIV/0! |
| Vmn2r4 637053        | -1 | #DIV/0! | 1 | #DIV/0! |
| 2300003K06Rik 666021 | -1 | #DIV/0! | 1 | #DIV/0! |
| Nox1 237038          | -1 | #DIV/0! | 1 | #DIV/0! |
| Serpinb7 116872      | -1 | #DIV/0! | 1 | #DIV/0! |
| Vmn2r75 546981       | -1 | #DIV/0! | 1 | #DIV/0! |
| Slc26a9 320718       | -1 | #DIV/0! | 1 | #DIV/0! |
| Prl 19109            | -1 | #DIV/0! | 1 | #DIV/0! |
| Olfr1535 404335      | -1 | #DIV/0! | 1 | #DIV/0! |
| Prss41 71003         | -1 | #DIV/0! | 1 | #DIV/0! |
| Gm13285 545654       | -1 | #DIV/0! | 1 | #DIV/0! |
| Trim58 216781        | -1 | #DIV/0! | 1 | #DIV/0! |
| Lrrn2 16980          | -1 | #DIV/0! | 1 | #DIV/0! |
| Olfr911-ps1 258873   | -1 | #DIV/0! | 1 | #DIV/0! |
| Mir3092 100526525    | -1 | #DIV/0! | 1 | #DIV/0! |
| Vmn1r231 171230      | -1 | #DIV/0! | 1 | #DIV/0! |
| Mir469 723872        | -1 | #DIV/0! | 1 | #DIV/0! |
| Vmn2r66 233437       | -1 | #DIV/0! | 1 | #DIV/0! |
| Pcdhga12 93724       | -1 | #DIV/0! | 1 | #DIV/0! |
| Hrasls5 66727        | -1 | #DIV/0! | 1 | #DIV/0! |
| Ceacam11 66996       | -1 | #DIV/0! | 1 | #DIV/0! |
| Olfr823 258668       | -1 | #DIV/0! | 1 | #DIV/0! |
| Spinkl 77424         | -1 | #DIV/0! | 1 | #DIV/0! |
| Tas2r134 387511      | -1 | #DIV/0! | 1 | #DIV/0! |
| Rnu12 104307         | -1 | #DIV/0! | 1 | #DIV/0! |
| Olfr1466 258689      | -1 | #DIV/0! | 1 | #DIV/0! |
| Mir216a 387212       | -1 | #DIV/0! | 1 | #DIV/0! |
| Trp73 22062          | -1 | #DIV/0! | 1 | #DIV/0! |
| Bpifb5 228802        | -1 | #DIV/0! | 1 | #DIV/0! |
| Catsperg2 76718      | -1 | #DIV/0! | 1 | #DIV/0! |
| Tceal7 100040972     | -1 | #DIV/0! | 1 | #DIV/0! |
| Ddn 13199            | -1 | #DIV/0! | 1 | #DIV/0! |
| Mos 17451            | -1 | #DIV/0! | 1 | #DIV/0! |
| Olfr1390 259068      | -1 | #DIV/0! | 1 | #DIV/0! |
| 4921501E09Rik 74042  | -1 | #DIV/0! | 1 | #DIV/0! |
| Olfr1039 257950      | -1 | #DIV/0! | 1 | #DIV/0! |
| Gjd2 14617           | -1 | #DIV/0! | 1 | #DIV/0! |
| Cdh20 23836          | -1 | #DIV/0! | 1 | #DIV/0! |
| Ctf2 244218          | -1 | #DIV/0! | 1 | #DIV/0! |
| Mirlet7c-1 387246    | -1 | #DIV/0! | 1 | #DIV/0! |
| 1700072E05Rik 73495  | -1 | #DIV/0! | 1 | #DIV/0! |
| Mir880 100124480     | -1 | #DIV/0! | 1 | #DIV/0! |
| Aox4 71872           | -1 | #DIV/0! | 1 | #DIV/0! |
| 2310050C09Rik 66533  | -1 | #DIV/0! | 1 | #DIV/0! |
| 2610305D13Rik 112422 | -1 | #DIV/0! | 1 | #DIV/0! |
| Krtap16-4 170654     | -1 | #DIV/0! | 1 | #DIV/0! |
| Mmp1a 83995          | -1 | #DIV/0! | 1 | #DIV/0! |
| Pla2g1b 18778        | -1 | #DIV/0! | 1 | #DIV/0! |
| Mir1197 100316751    | -1 | #DIV/0! | 1 | #DIV/0! |

|                      |    |         |   |         |
|----------------------|----|---------|---|---------|
| 4921511C20Rik 245598 | -1 | #DIV/0! | 1 | #DIV/0! |
| Spag11b 546038       | -1 | #DIV/0! | 1 | #DIV/0! |
| Csnka2ip 224291      | -1 | #DIV/0! | 1 | #DIV/0! |
| 9130404H23Rik 74556  | -1 | #DIV/0! | 1 | #DIV/0! |
| Prss35 244954        | -1 | #DIV/0! | 1 | #DIV/0! |
| Gm906 380882         | -1 | #DIV/0! | 1 | #DIV/0! |
| Htr1f 15557          | -1 | #DIV/0! | 1 | #DIV/0! |
| H2-M10.5 224761      | -1 | #DIV/0! | 1 | #DIV/0! |
| BC021785 215928      | -1 | #DIV/0! | 1 | #DIV/0! |
| Ifna12 242519        | -1 | #DIV/0! | 1 | #DIV/0! |
| Cntn3 18488          | -1 | #DIV/0! | 1 | #DIV/0! |
| Mir466g 100124495    | -1 | #DIV/0! | 1 | #DIV/0! |
| Gm9961 791359        | -1 | #DIV/0! | 1 | #DIV/0! |
| Il10 16153           | -1 | #DIV/0! | 1 | #DIV/0! |
| Mab211i 17116        | -1 | #DIV/0! | 1 | #DIV/0! |
| Kcna4 16492          | -1 | #DIV/0! | 1 | #DIV/0! |
| Olf629 258818        | -1 | #DIV/0! | 1 | #DIV/0! |
| Olf774 258232        | -1 | #DIV/0! | 1 | #DIV/0! |
| Foxl2 26927          | -1 | #DIV/0! | 1 | #DIV/0! |
| Tmem217 71138        | -1 | #DIV/0! | 1 | #DIV/0! |
| Vmn1r129 621510      | -1 | #DIV/0! | 1 | #DIV/0! |
| Mir199a-1 387194     | -1 | #DIV/0! | 1 | #DIV/0! |
| Fbxw28 668758        | -1 | #DIV/0! | 1 | #DIV/0! |
| Vmn1r33 171187       | -1 | #DIV/0! | 1 | #DIV/0! |
| Slco4c1 227394       | -1 | #DIV/0! | 1 | #DIV/0! |
| Fxyd4 108017         | -1 | #DIV/0! | 1 | #DIV/0! |
| Il3 16187            | -1 | #DIV/0! | 1 | #DIV/0! |
| Mesp2 17293          | -1 | #DIV/0! | 1 | #DIV/0! |
| Olf38 258988         | -1 | #DIV/0! | 1 | #DIV/0! |
| Pth2r 213527         | -1 | #DIV/0! | 1 | #DIV/0! |
| Olf1140 258635       | -1 | #DIV/0! | 1 | #DIV/0! |
| Mir410 723863        | -1 | #DIV/0! | 1 | #DIV/0! |
| Gm5294 384244        | -1 | #DIV/0! | 1 | #DIV/0! |
| Ttc34 242800         | -1 | #DIV/0! | 1 | #DIV/0! |
| Olf845 258249        | -1 | #DIV/0! | 1 | #DIV/0! |
| Pcdha7 12939         | -1 | #DIV/0! | 1 | #DIV/0! |
| Sec1 56546           | -1 | #DIV/0! | 1 | #DIV/0! |
| Olf32 18331          | -1 | #DIV/0! | 1 | #DIV/0! |
| Fam183b 75429        | -1 | #DIV/0! | 1 | #DIV/0! |
| Snord100 100529075   | -1 | #DIV/0! | 1 | #DIV/0! |
| Olf1348 258915       | -1 | #DIV/0! | 1 | #DIV/0! |
| Khdc1b 98582         | -1 | #DIV/0! | 1 | #DIV/0! |
| Olf658 259051        | -1 | #DIV/0! | 1 | #DIV/0! |
| 4931423N10Rik 70981  | -1 | #DIV/0! | 1 | #DIV/0! |
| 9630028H03Rik 320684 | -1 | #DIV/0! | 1 | #DIV/0! |
| Reg3a 19694          | -1 | #DIV/0! | 1 | #DIV/0! |
| Vmn1r59 404284       | -1 | #DIV/0! | 1 | #DIV/0! |
| Olf156 29846         | -1 | #DIV/0! | 1 | #DIV/0! |
| 1700109G14Rik 67355  | -1 | #DIV/0! | 1 | #DIV/0! |
| Sun5 76407           | -1 | #DIV/0! | 1 | #DIV/0! |
| Bmp15 12155          | -1 | #DIV/0! | 1 | #DIV/0! |
| Mir208a 387204       | -1 | #DIV/0! | 1 | #DIV/0! |
| Gm12789 381536       | -1 | #DIV/0! | 1 | #DIV/0! |

|                      |    |         |   |         |
|----------------------|----|---------|---|---------|
| Vmn1r28 171198       | -1 | #DIV/0! | 1 | #DIV/0! |
| Olfr874 258882       | -1 | #DIV/0! | 1 | #DIV/0! |
| Slc5a4b 64454        | -1 | #DIV/0! | 1 | #DIV/0! |
| Mir351 723910        | -1 | #DIV/0! | 1 | #DIV/0! |
| Lin28b 380669        | -1 | #DIV/0! | 1 | #DIV/0! |
| Btn2a2 238555        | -1 | #DIV/0! | 1 | #DIV/0! |
| Slc6a15 103098       | -1 | #DIV/0! | 1 | #DIV/0! |
| Poteg 70952          | -1 | #DIV/0! | 1 | #DIV/0! |
| Tfap2b 21419         | -1 | #DIV/0! | 1 | #DIV/0! |
| Gpr6 140741          | -1 | #DIV/0! | 1 | #DIV/0! |
| Fam70a 245386        | -1 | #DIV/0! | 1 | #DIV/0! |
| Fut9 14348           | -1 | #DIV/0! | 1 | #DIV/0! |
| Mir3094 100526501    | -1 | #DIV/0! | 1 | #DIV/0! |
| F730043M19Rik 320046 | -1 | #DIV/0! | 1 | #DIV/0! |
| Tnr 21960            | -1 | #DIV/0! | 1 | #DIV/0! |
| Gcnt3 72077          | -1 | #DIV/0! | 1 | #DIV/0! |
| Hist1h2an 319170     | -1 | #DIV/0! | 1 | #DIV/0! |
| Cacng6 54378         | -1 | #DIV/0! | 1 | #DIV/0! |
| Fbxw13 211305        | -1 | #DIV/0! | 1 | #DIV/0! |
| Ankfn1 382543        | -1 | #DIV/0! | 1 | #DIV/0! |
| Gm16381 100042786    | -1 | #DIV/0! | 1 | #DIV/0! |
| Gm17384 100322896    | -1 | #DIV/0! | 1 | #DIV/0! |
| C530008M17Rik 320827 | -1 | #DIV/0! | 1 | #DIV/0! |
| Olfr608 258751       | -1 | #DIV/0! | 1 | #DIV/0! |
| Foxc1 17300          | -1 | #DIV/0! | 1 | #DIV/0! |
| Gpa33 59290          | -1 | #DIV/0! | 1 | #DIV/0! |
| Nkx3-1 18095         | -1 | #DIV/0! | 1 | #DIV/0! |
| Olfr1496 258991      | -1 | #DIV/0! | 1 | #DIV/0! |
| Psapl1 76943         | -1 | #DIV/0! | 1 | #DIV/0! |
| Xlr5b 627081         | -1 | #DIV/0! | 1 | #DIV/0! |
| Olfr1225 258893      | -1 | #DIV/0! | 1 | #DIV/0! |
| Gm5111 330305        | -1 | #DIV/0! | 1 | #DIV/0! |
| Cngb1 333329         | -1 | #DIV/0! | 1 | #DIV/0! |
| Spag6 50525          | -1 | #DIV/0! | 1 | #DIV/0! |
| Mir22 387141         | -1 | #DIV/0! | 1 | #DIV/0! |
| 4930404H21Rik 73808  | -1 | #DIV/0! | 1 | #DIV/0! |
| Rgs7 24012           | -1 | #DIV/0! | 1 | #DIV/0! |
| Pde6a 225600         | -1 | #DIV/0! | 1 | #DIV/0! |
| Mir29b-1 387223      | -1 | #DIV/0! | 1 | #DIV/0! |
| Gm13101 626922       | -1 | #DIV/0! | 1 | #DIV/0! |
| Snord4a 100216539    | -1 | #DIV/0! | 1 | #DIV/0! |
| Pabpc2 18459         | -1 | #DIV/0! | 1 | #DIV/0! |
| 4921517D22Rik 70900  | -1 | #DIV/0! | 1 | #DIV/0! |
| Mcpt9 17232          | -1 | #DIV/0! | 1 | #DIV/0! |
| Itln1 16429          | -1 | #DIV/0! | 1 | #DIV/0! |
| Dnahc9 237806        | -1 | #DIV/0! | 1 | #DIV/0! |
| Hmx3 15373           | -1 | #DIV/0! | 1 | #DIV/0! |
| Krtap7-1 71363       | -1 | #DIV/0! | 1 | #DIV/0! |
| Fate1 77905          | -1 | #DIV/0! | 1 | #DIV/0! |
| Ms4a13 73466         | -1 | #DIV/0! | 1 | #DIV/0! |
| Asb16 217217         | -1 | #DIV/0! | 1 | #DIV/0! |
| Gm5483 433016        | -1 | #DIV/0! | 1 | #DIV/0! |
| Mir211 387207        | -1 | #DIV/0! | 1 | #DIV/0! |

|                     |    |         |   |         |
|---------------------|----|---------|---|---------|
| Abo 80908           | -1 | #DIV/0! | 1 | #DIV/0! |
| Gm438 329993        | -1 | #DIV/0! | 1 | #DIV/0! |
| Ear4 53877          | -1 | #DIV/0! | 1 | #DIV/0! |
| Calcr 12311         | -1 | #DIV/0! | 1 | #DIV/0! |
| Tcl1b2 27381        | -1 | #DIV/0! | 1 | #DIV/0! |
| Dytn 241073         | -1 | #DIV/0! | 1 | #DIV/0! |
| Mir691 751561       | -1 | #DIV/0! | 1 | #DIV/0! |
| Krtap1-4 629873     | -1 | #DIV/0! | 1 | #DIV/0! |
| Olfr930 258269      | -1 | #DIV/0! | 1 | #DIV/0! |
| Lyg2 332427         | -1 | #DIV/0! | 1 | #DIV/0! |
| Spink6 433180       | -1 | #DIV/0! | 1 | #DIV/0! |
| Olfr1316 258737     | -1 | #DIV/0! | 1 | #DIV/0! |
| Olfr968 258605      | -1 | #DIV/0! | 1 | #DIV/0! |
| Lce1a2 73722        | -1 | #DIV/0! | 1 | #DIV/0! |
| Scd3 30049          | -1 | #DIV/0! | 1 | #DIV/0! |
| Hs3st2 195646       | -1 | #DIV/0! | 1 | #DIV/0! |
| Lrrc43 381741       | -1 | #DIV/0! | 1 | #DIV/0! |
| Nanog 71950         | -1 | #DIV/0! | 1 | #DIV/0! |
| Olfr847 258518      | -1 | #DIV/0! | 1 | #DIV/0! |
| Olfr307 258610      | -1 | #DIV/0! | 1 | #DIV/0! |
| Oog4 242737         | -1 | #DIV/0! | 1 | #DIV/0! |
| Tmem190 78052       | -1 | #DIV/0! | 1 | #DIV/0! |
| Olfr462 258406      | -1 | #DIV/0! | 1 | #DIV/0! |
| Lfn5 238205         | -1 | #DIV/0! | 1 | #DIV/0! |
| Vmn2r117 619788     | -1 | #DIV/0! | 1 | #DIV/0! |
| Scarna10 100217413  | -1 | #DIV/0! | 1 | #DIV/0! |
| 4933412E24Rik 71088 | -1 | #DIV/0! | 1 | #DIV/0! |
| Olfr1271 258789     | -1 | #DIV/0! | 1 | #DIV/0! |
| Cass4 320664        | -1 | #DIV/0! | 1 | #DIV/0! |
| 1700086L19Rik 74284 | -1 | #DIV/0! | 1 | #DIV/0! |
| Olfr1433 258680     | -1 | #DIV/0! | 1 | #DIV/0! |
| Snord90 100217435   | -1 | #DIV/0! | 1 | #DIV/0! |
| Taar8a 215859       | -1 | #DIV/0! | 1 | #DIV/0! |
| Olfr172 259003      | -1 | #DIV/0! | 1 | #DIV/0! |
| Prss32 69814        | -1 | #DIV/0! | 1 | #DIV/0! |
| Sptlc3 228677       | -1 | #DIV/0! | 1 | #DIV/0! |
| Mir1962 100316818   | -1 | #DIV/0! | 1 | #DIV/0! |
| Gm13178 546849      | -1 | #DIV/0! | 1 | #DIV/0! |
| Cubn 65969          | -1 | #DIV/0! | 1 | #DIV/0! |
| Olfr981 258283      | -1 | #DIV/0! | 1 | #DIV/0! |
| Gsdmc4 74548        | -1 | #DIV/0! | 1 | #DIV/0! |
| Nms 433292          | -1 | #DIV/0! | 1 | #DIV/0! |
| Mir1892 100316682   | -1 | #DIV/0! | 1 | #DIV/0! |
| Lcn8 78076          | -1 | #DIV/0! | 1 | #DIV/0! |
| Glp1r 14652         | -1 | #DIV/0! | 1 | #DIV/0! |
| Gm7073 631784       | -1 | #DIV/0! | 1 | #DIV/0! |
| Olfr702 258590      | -1 | #DIV/0! | 1 | #DIV/0! |
| Hist1h2ak 319169    | -1 | #DIV/0! | 1 | #DIV/0! |
| Spr2k 20765         | -1 | #DIV/0! | 1 | #DIV/0! |
| Nkx2-5 18091        | -1 | #DIV/0! | 1 | #DIV/0! |
| Pramel3 83565       | -1 | #DIV/0! | 1 | #DIV/0! |
| Olfr1095 258725     | -1 | #DIV/0! | 1 | #DIV/0! |
| Adam6b 238405       | -1 | #DIV/0! | 1 | #DIV/0! |

|                         |    |         |   |         |
|-------------------------|----|---------|---|---------|
| Gm6320 622408           | -1 | #DIV/0! | 1 | #DIV/0! |
| Sis 69983               | -1 | #DIV/0! | 1 | #DIV/0! |
| Krt75 109052            | -1 | #DIV/0! | 1 | #DIV/0! |
| Klra9 16640             | -1 | #DIV/0! | 1 | #DIV/0! |
| Hrh4 225192             | -1 | #DIV/0! | 1 | #DIV/0! |
| Amph 218038             | -1 | #DIV/0! | 1 | #DIV/0! |
| Mir133a-2 723954        | -1 | #DIV/0! | 1 | #DIV/0! |
| Olfr665 258810          | -1 | #DIV/0! | 1 | #DIV/0! |
| Pdha2 18598             | -1 | #DIV/0! | 1 | #DIV/0! |
| Gm11166 625850          | -1 | #DIV/0! | 1 | #DIV/0! |
| Olfr266 258482          | -1 | #DIV/0! | 1 | #DIV/0! |
| Olig2 50913             | -1 | #DIV/0! | 1 | #DIV/0! |
| Mir582 100124489        | -1 | #DIV/0! | 1 | #DIV/0! |
| Olfr259 258766          | -1 | #DIV/0! | 1 | #DIV/0! |
| Gkn2 66284              | -1 | #DIV/0! | 1 | #DIV/0! |
| Il17f 257630            | -1 | #DIV/0! | 1 | #DIV/0! |
| Mchr1 207911            | -1 | #DIV/0! | 1 | #DIV/0! |
| Vmn2r15 211223          | -1 | #DIV/0! | 1 | #DIV/0! |
| Olfr531 258955          | -1 | #DIV/0! | 1 | #DIV/0! |
| Mir376a 723855          | -1 | #DIV/0! | 1 | #DIV/0! |
| Il21 60505              | -1 | #DIV/0! | 1 | #DIV/0! |
| Lhb 16866               | -1 | #DIV/0! | 1 | #DIV/0! |
| Npy6r 18169             | -1 | #DIV/0! | 1 | #DIV/0! |
| D030047H15Rik 100037396 | -1 | #DIV/0! | 1 | #DIV/0! |
| Gm694 277744            | -1 | #DIV/0! | 1 | #DIV/0! |
| BC053393 407814         | -1 | #DIV/0! | 1 | #DIV/0! |
| 4930471G03Rik 74966     | -1 | #DIV/0! | 1 | #DIV/0! |
| 9330159F19Rik 212448    | -1 | #DIV/0! | 1 | #DIV/0! |
| 4933436I01Rik 66780     | -1 | #DIV/0! | 1 | #DIV/0! |
| Prss21 57256            | -1 | #DIV/0! | 1 | #DIV/0! |
| Olfr707 194433          | -1 | #DIV/0! | 1 | #DIV/0! |
| Defa-rs1 13218          | -1 | #DIV/0! | 1 | #DIV/0! |
| Rhox2a 75199            | -1 | #DIV/0! | 1 | #DIV/0! |
| 4930415L06Rik 245511    | -1 | #DIV/0! | 1 | #DIV/0! |
| Arhgef33 381112         | -1 | #DIV/0! | 1 | #DIV/0! |
| Lrriq1 74978            | -1 | #DIV/0! | 1 | #DIV/0! |
| Mir1193 100316673       | -1 | #DIV/0! | 1 | #DIV/0! |
| Rab39b 67790            | -1 | #DIV/0! | 1 | #DIV/0! |
| Tbx18 76365             | -1 | #DIV/0! | 1 | #DIV/0! |
| Tspy15 239364           | -1 | #DIV/0! | 1 | #DIV/0! |
| Fam196b 574403          | -1 | #DIV/0! | 1 | #DIV/0! |
| 4930568D16Rik 75859     | -1 | #DIV/0! | 1 | #DIV/0! |
| Rgag1 209540            | -1 | #DIV/0! | 1 | #DIV/0! |
| Abca16 233810           | -1 | #DIV/0! | 1 | #DIV/0! |
| Vmn2r78 637896          | -1 | #DIV/0! | 1 | #DIV/0! |
| Olfr1014 258562         | -1 | #DIV/0! | 1 | #DIV/0! |
| Mir1982 100316778       | -1 | #DIV/0! | 1 | #DIV/0! |
| Fgf16 80903             | -1 | #DIV/0! | 1 | #DIV/0! |
| Tex15 104271            | -1 | #DIV/0! | 1 | #DIV/0! |
| Ccdc74a 72315           | -1 | #DIV/0! | 1 | #DIV/0! |
| Retnlb 57263            | -1 | #DIV/0! | 1 | #DIV/0! |
| Olfr1353 259044         | -1 | #DIV/0! | 1 | #DIV/0! |
| 5430419D17Rik 71395     | -1 | #DIV/0! | 1 | #DIV/0! |

|                     |    |         |   |         |
|---------------------|----|---------|---|---------|
| Agr3 403205         | -1 | #DIV/0! | 1 | #DIV/0! |
| Chrn3 108043        | -1 | #DIV/0! | 1 | #DIV/0! |
| Hcn1 15165          | -1 | #DIV/0! | 1 | #DIV/0! |
| AK129341 234915     | -1 | #DIV/0! | 1 | #DIV/0! |
| Hmx2 15372          | -1 | #DIV/0! | 1 | #DIV/0! |
| Mir4660 100526482   | -1 | #DIV/0! | 1 | #DIV/0! |
| 1700028B04Rik 70001 | -1 | #DIV/0! | 1 | #DIV/0! |
| 2610318N02Rik 70458 | -1 | #DIV/0! | 1 | #DIV/0! |
| Olfr510 258308      | -1 | #DIV/0! | 1 | #DIV/0! |
| Mir10b 387144       | -1 | #DIV/0! | 1 | #DIV/0! |
| Olfr1380 404336     | -1 | #DIV/0! | 1 | #DIV/0! |
| Mir181d 100049549   | -1 | #DIV/0! | 1 | #DIV/0! |
| Spaca5 278203       | -1 | #DIV/0! | 1 | #DIV/0! |
| AF357355 100303646  | -1 | #DIV/0! | 1 | #DIV/0! |
| Vmn2r101 627576     | -1 | #DIV/0! | 1 | #DIV/0! |
| Olfr549 259105      | -1 | #DIV/0! | 1 | #DIV/0! |
| BB287469 544881     | -1 | #DIV/0! | 1 | #DIV/0! |
| Olfr1420 258405     | -1 | #DIV/0! | 1 | #DIV/0! |
| Gm5796 545007       | -1 | #DIV/0! | 1 | #DIV/0! |
| Krtap16-7 170656    | -1 | #DIV/0! | 1 | #DIV/0! |
| Gm20408 100126765   | -1 | #DIV/0! | 1 | #DIV/0! |
| LOC547349 547349    | -1 | #DIV/0! | 1 | #DIV/0! |
| Bpifa3 73388        | -1 | #DIV/0! | 1 | #DIV/0! |
| Tmed6 66269         | -1 | #DIV/0! | 1 | #DIV/0! |
| Vmn2r105 627743     | -1 | #DIV/0! | 1 | #DIV/0! |
| Nmur2 216749        | -1 | #DIV/0! | 1 | #DIV/0! |
| Mir15a 387174       | -1 | #DIV/0! | 1 | #DIV/0! |
| Olfr1502 258793     | -1 | #DIV/0! | 1 | #DIV/0! |
| Gm1140 382217       | -1 | #DIV/0! | 1 | #DIV/0! |
| 1700125H20Rik 73634 | -1 | #DIV/0! | 1 | #DIV/0! |
| Sirpb1a 320832      | -1 | #DIV/0! | 1 | #DIV/0! |
| Gm10922 668964      | -1 | #DIV/0! | 1 | #DIV/0! |
| Btg4 56057          | -1 | #DIV/0! | 1 | #DIV/0! |
| Nkx6-3 74561        | -1 | #DIV/0! | 1 | #DIV/0! |
| Serpinb5 20724      | -1 | #DIV/0! | 1 | #DIV/0! |
| Mir654 100124453    | -1 | #DIV/0! | 1 | #DIV/0! |
| Insm2 56856         | -1 | #DIV/0! | 1 | #DIV/0! |
| Gpr82 319200        | -1 | #DIV/0! | 1 | #DIV/0! |
| Vmn2r30 22306       | -1 | #DIV/0! | 1 | #DIV/0! |
| Cldn17 239931       | -1 | #DIV/0! | 1 | #DIV/0! |
| Olfr853 258908      | -1 | #DIV/0! | 1 | #DIV/0! |
| Mir34b 723849       | -1 | #DIV/0! | 1 | #DIV/0! |
| Mir344g 100526507   | -1 | #DIV/0! | 1 | #DIV/0! |
| Vmn1r13 113862      | -1 | #DIV/0! | 1 | #DIV/0! |
| Rtbdn 234542        | -1 | #DIV/0! | 1 | #DIV/0! |
| Fam69c 240479       | -1 | #DIV/0! | 1 | #DIV/0! |
| Olfr1318 258022     | -1 | #DIV/0! | 1 | #DIV/0! |
| Impg1 63859         | -1 | #DIV/0! | 1 | #DIV/0! |
| Naip7 53880         | -1 | #DIV/0! | 1 | #DIV/0! |
| 1700008P02Rik 69347 | -1 | #DIV/0! | 1 | #DIV/0! |
| Prl7b1 75596        | -1 | #DIV/0! | 1 | #DIV/0! |
| Gpx2-ps1 14777      | -1 | #DIV/0! | 1 | #DIV/0! |
| Gm8348 666890       | -1 | #DIV/0! | 1 | #DIV/0! |

|                      |    |         |   |         |
|----------------------|----|---------|---|---------|
| Olfr99 258508        | -1 | #DIV/0! | 1 | #DIV/0! |
| Pnmal1 71691         | -1 | #DIV/0! | 1 | #DIV/0! |
| Olfr726 258313       | -1 | #DIV/0! | 1 | #DIV/0! |
| BC027072 225004      | -1 | #DIV/0! | 1 | #DIV/0! |
| Gsdmcl1 74236        | -1 | #DIV/0! | 1 | #DIV/0! |
| Arl9 384185          | -1 | #DIV/0! | 1 | #DIV/0! |
| Vwa2 240675          | -1 | #DIV/0! | 1 | #DIV/0! |
| Dscaml1 114873       | -1 | #DIV/0! | 1 | #DIV/0! |
| Ptgs2 19225          | -1 | #DIV/0! | 1 | #DIV/0! |
| Vmn1r6 171193        | -1 | #DIV/0! | 1 | #DIV/0! |
| 4833427G06Rik 235345 | -1 | #DIV/0! | 1 | #DIV/0! |
| Mir669p-2 100526538  | -1 | #DIV/0! | 1 | #DIV/0! |
| Smok4a 272667        | -1 | #DIV/0! | 1 | #DIV/0! |
| Agr1b 11608          | -1 | #DIV/0! | 1 | #DIV/0! |
| Atp6v1e2 74915       | -1 | #DIV/0! | 1 | #DIV/0! |
| Ldlrad2 435811       | -1 | #DIV/0! | 1 | #DIV/0! |
| Pcdha11 12942        | -1 | #DIV/0! | 1 | #DIV/0! |
| Scn9a 20274          | -1 | #DIV/0! | 1 | #DIV/0! |
| Gm9839 408192        | -1 | #DIV/0! | 1 | #DIV/0! |
| Gm13023 194227       | -1 | #DIV/0! | 1 | #DIV/0! |
| Olfr281 258277       | -1 | #DIV/0! | 1 | #DIV/0! |
| Olfr1239 258972      | -1 | #DIV/0! | 1 | #DIV/0! |
| Dnajc5g 231098       | -1 | #DIV/0! | 1 | #DIV/0! |
| Vmn1r127 621561      | -1 | #DIV/0! | 1 | #DIV/0! |
| Mir187 387182        | -1 | #DIV/0! | 1 | #DIV/0! |
| Serpib9f 20709       | -1 | #DIV/0! | 1 | #DIV/0! |
| Vmn2r11 384219       | -1 | #DIV/0! | 1 | #DIV/0! |
| Rab26 328778         | -1 | #DIV/0! | 1 | #DIV/0! |
| Igdcc3 19289         | -1 | #DIV/0! | 1 | #DIV/0! |
| Dkk1 13380           | -1 | #DIV/0! | 1 | #DIV/0! |
| Tsga13 116732        | -1 | #DIV/0! | 1 | #DIV/0! |
| Tac1 21333           | -1 | #DIV/0! | 1 | #DIV/0! |
| Mettl11b 240879      | -1 | #DIV/0! | 1 | #DIV/0! |
| Olfr615 259084       | -1 | #DIV/0! | 1 | #DIV/0! |
| Hes5 15208           | -1 | #DIV/0! | 1 | #DIV/0! |
| H1fnt 70069          | -1 | #DIV/0! | 1 | #DIV/0! |
| Olfr1362 258739      | -1 | #DIV/0! | 1 | #DIV/0! |
| Mir669m-2 100316834  | -1 | #DIV/0! | 1 | #DIV/0! |
| Arpp21 74100         | -1 | #DIV/0! | 1 | #DIV/0! |
| Mirlet7i 387251      | -1 | #DIV/0! | 1 | #DIV/0! |
| Gm595 209005         | -1 | #DIV/0! | 1 | #DIV/0! |
| Olfr1289 258399      | -1 | #DIV/0! | 1 | #DIV/0! |
| Vat1l 270097         | -1 | #DIV/0! | 1 | #DIV/0! |
| Glr1b 14658          | -1 | #DIV/0! | 1 | #DIV/0! |
| En1 13798            | -1 | #DIV/0! | 1 | #DIV/0! |
| Agrp 11604           | -1 | #DIV/0! | 1 | #DIV/0! |
| Vmn2r42 22310        | -1 | #DIV/0! | 1 | #DIV/0! |
| Cck 12424            | -1 | #DIV/0! | 1 | #DIV/0! |
| Mir695 735287        | -1 | #DIV/0! | 1 | #DIV/0! |
| Gip 14607            | -1 | #DIV/0! | 1 | #DIV/0! |
| Mir9-1 387133        | -1 | #DIV/0! | 1 | #DIV/0! |
| Prm2 19119           | -1 | #DIV/0! | 1 | #DIV/0! |
| Tmprss11e 243084     | -1 | #DIV/0! | 1 | #DIV/0! |

|                      |    |         |   |         |
|----------------------|----|---------|---|---------|
| Vmn2r14 231591       | -1 | #DIV/0! | 1 | #DIV/0! |
| Sult2a6 629219       | -1 | #DIV/0! | 1 | #DIV/0! |
| F730016J06Rik 320194 | -1 | #DIV/0! | 1 | #DIV/0! |
| Olfr648 258746       | -1 | #DIV/0! | 1 | #DIV/0! |
| 1700016H13Rik 74218  | -1 | #DIV/0! | 1 | #DIV/0! |
| Mir331 723908        | -1 | #DIV/0! | 1 | #DIV/0! |
| Tac2 21334           | -1 | #DIV/0! | 1 | #DIV/0! |
| Olfr851 258907       | -1 | #DIV/0! | 1 | #DIV/0! |
| 1700123K08Rik 76658  | -1 | #DIV/0! | 1 | #DIV/0! |
| Fat2 245827          | -1 | #DIV/0! | 1 | #DIV/0! |
| Tac4 93670           | -1 | #DIV/0! | 1 | #DIV/0! |
| Lce1d 69611          | -1 | #DIV/0! | 1 | #DIV/0! |
| Gm1568 380768        | -1 | #DIV/0! | 1 | #DIV/0! |
| Ppapdc1a 381925      | -1 | #DIV/0! | 1 | #DIV/0! |
| Trhr 22045           | -1 | #DIV/0! | 1 | #DIV/0! |
| Gm10081 384732       | -1 | #DIV/0! | 1 | #DIV/0! |
| Prmt8 381813         | -1 | #DIV/0! | 1 | #DIV/0! |
| Lalba 16770          | -1 | #DIV/0! | 1 | #DIV/0! |
| Olfr344 258621       | -1 | #DIV/0! | 1 | #DIV/0! |
| Tas2r135 387512      | -1 | #DIV/0! | 1 | #DIV/0! |
| Hoxa6 15403          | -1 | #DIV/0! | 1 | #DIV/0! |
| Olfr582 259055       | -1 | #DIV/0! | 1 | #DIV/0! |
| Olfr586 259115       | -1 | #DIV/0! | 1 | #DIV/0! |
| Nell1 338352         | -1 | #DIV/0! | 1 | #DIV/0! |
| Duoxa1 213696        | -1 | #DIV/0! | 1 | #DIV/0! |
| Olfr553 233578       | -1 | #DIV/0! | 1 | #DIV/0! |
| Frmpr3 245643        | -1 | #DIV/0! | 1 | #DIV/0! |
| 1700020N18Rik 67086  | -1 | #DIV/0! | 1 | #DIV/0! |
| Pla2g4e 329502       | -1 | #DIV/0! | 1 | #DIV/0! |
| Prdm14 383491        | -1 | #DIV/0! | 1 | #DIV/0! |
| Vmn1r17 171189       | -1 | #DIV/0! | 1 | #DIV/0! |
| EU599041 100170401   | -1 | #DIV/0! | 1 | #DIV/0! |
| Gm13084 381569       | -1 | #DIV/0! | 1 | #DIV/0! |
| Agr2 23795           | -1 | #DIV/0! | 1 | #DIV/0! |
| Olfr993 258427       | -1 | #DIV/0! | 1 | #DIV/0! |
| Olfr811 258545       | -1 | #DIV/0! | 1 | #DIV/0! |
| Gm1968 328657        | -1 | #DIV/0! | 1 | #DIV/0! |
| Serpinb3a 20248      | -1 | #DIV/0! | 1 | #DIV/0! |
| Mrgpra1 233221       | -1 | #DIV/0! | 1 | #DIV/0! |
| Olfr223 258421       | -1 | #DIV/0! | 1 | #DIV/0! |
| Zik1 22775           | -1 | #DIV/0! | 1 | #DIV/0! |
| Actl7b 11471         | -1 | #DIV/0! | 1 | #DIV/0! |
| Hsf3 245525          | -1 | #DIV/0! | 1 | #DIV/0! |
| Olfr1229 257921      | -1 | #DIV/0! | 1 | #DIV/0! |
| Cacna2d3 12294       | -1 | #DIV/0! | 1 | #DIV/0! |
| Olfr738 258662       | -1 | #DIV/0! | 1 | #DIV/0! |
| Snora75 100303740    | -1 | #DIV/0! | 1 | #DIV/0! |
| 4933406M09Rik 240755 | -1 | #DIV/0! | 1 | #DIV/0! |
| Cdx1 12590           | -1 | #DIV/0! | 1 | #DIV/0! |
| Olfr420 258302       | -1 | #DIV/0! | 1 | #DIV/0! |
| 2310002J15Rik 67859  | -1 | #DIV/0! | 1 | #DIV/0! |
| Gm9758 381714        | -1 | #DIV/0! | 1 | #DIV/0! |
| Slc30a2 230810       | -1 | #DIV/0! | 1 | #DIV/0! |



|                      |    |         |   |         |
|----------------------|----|---------|---|---------|
| Emid2 140709         | -1 | #DIV/0! | 1 | #DIV/0! |
| Mir421 100124494     | -1 | #DIV/0! | 1 | #DIV/0! |
| Htr2c 15560          | -1 | #DIV/0! | 1 | #DIV/0! |
| Lrrc38 242735        | -1 | #DIV/0! | 1 | #DIV/0! |
| Olfr1047 259014      | -1 | #DIV/0! | 1 | #DIV/0! |
| St6gal2 240119       | -1 | #DIV/0! | 1 | #DIV/0! |
| Krt9 107656          | -1 | #DIV/0! | 1 | #DIV/0! |
| Ifna5 15968          | -1 | #DIV/0! | 1 | #DIV/0! |
| Dtl 76843            | -1 | #DIV/0! | 1 | #DIV/0! |
| 1700006A11Rik 71824  | -1 | #DIV/0! | 1 | #DIV/0! |
| Gm428 242502         | -1 | #DIV/0! | 1 | #DIV/0! |
| Zfp536 243937        | -1 | #DIV/0! | 1 | #DIV/0! |
| Nek10 238944         | -1 | #DIV/0! | 1 | #DIV/0! |
| Trim54 58522         | -1 | #DIV/0! | 1 | #DIV/0! |
| Mir1963 100316710    | -1 | #DIV/0! | 1 | #DIV/0! |
| Gm5468 432939        | -1 | #DIV/0! | 1 | #DIV/0! |
| Gm2016 100039042     | -1 | #DIV/0! | 1 | #DIV/0! |
| Hsd11b2 15484        | -1 | #DIV/0! | 1 | #DIV/0! |
| Ubtfl1 546118        | -1 | #DIV/0! | 1 | #DIV/0! |
| Olfr1367 258526      | -1 | #DIV/0! | 1 | #DIV/0! |
| Gm7904 666043        | -1 | #DIV/0! | 1 | #DIV/0! |
| 4930596D02Rik 239036 | -1 | #DIV/0! | 1 | #DIV/0! |
| Olfr424 258716       | -1 | #DIV/0! | 1 | #DIV/0! |
| Tshr 22095           | -1 | #DIV/0! | 1 | #DIV/0! |
| Lrrtm2 107065        | -1 | #DIV/0! | 1 | #DIV/0! |
| Defa25 13236         | -1 | #DIV/0! | 1 | #DIV/0! |
| Olfr836 258557       | -1 | #DIV/0! | 1 | #DIV/0! |
| Cntnap5c 620292      | -1 | #DIV/0! | 1 | #DIV/0! |
| Artn 11876           | -1 | #DIV/0! | 1 | #DIV/0! |
| Dspp 666279          | -1 | #DIV/0! | 1 | #DIV/0! |
| Dsc3 13507           | -1 | #DIV/0! | 1 | #DIV/0! |
| Trh 22044            | -1 | #DIV/0! | 1 | #DIV/0! |
| Ugt2a1 94215         | -1 | #DIV/0! | 1 | #DIV/0! |
| Fcer1a 14125         | -1 | #DIV/0! | 1 | #DIV/0! |
| Rab42-ps 242681      | -1 | #DIV/0! | 1 | #DIV/0! |
| Olfr620 258808       | -1 | #DIV/0! | 1 | #DIV/0! |
| Pcdhb12 93883        | -1 | #DIV/0! | 1 | #DIV/0! |
| AU022751 102991      | -1 | #DIV/0! | 1 | #DIV/0! |
| Fzd10 93897          | -1 | #DIV/0! | 1 | #DIV/0! |
| Olfr832 258075       | -1 | #DIV/0! | 1 | #DIV/0! |
| Syt17 110058         | -1 | #DIV/0! | 1 | #DIV/0! |
| Jakmip3 74004        | -1 | #DIV/0! | 1 | #DIV/0! |
| Krtap5-1 50774       | -1 | #DIV/0! | 1 | #DIV/0! |
| Igf2bp1 140486       | -1 | #DIV/0! | 1 | #DIV/0! |
| Mir688 751542        | -1 | #DIV/0! | 1 | #DIV/0! |
| Pcdhb8 93879         | -1 | #DIV/0! | 1 | #DIV/0! |
| Cdh11 12552          | -1 | #DIV/0! | 1 | #DIV/0! |
| Tmsb15a 78478        | -1 | #DIV/0! | 1 | #DIV/0! |
| Tmem182 381339       | -1 | #DIV/0! | 1 | #DIV/0! |
| Lce3c 94060          | -1 | #DIV/0! | 1 | #DIV/0! |
| Olfr983 258824       | -1 | #DIV/0! | 1 | #DIV/0! |
| Olfr346 258940       | -1 | #DIV/0! | 1 | #DIV/0! |
| Mir490 735279        | -1 | #DIV/0! | 1 | #DIV/0! |

|                      |    |         |   |         |
|----------------------|----|---------|---|---------|
| Olfr1084 258235      | -1 | #DIV/0! | 1 | #DIV/0! |
| Serpinb1b 282663     | -1 | #DIV/0! | 1 | #DIV/0! |
| 4930525F21Rik 75823  | -1 | #DIV/0! | 1 | #DIV/0! |
| Omt2b 382088         | -1 | #DIV/0! | 1 | #DIV/0! |
| Mir219-2 723904      | -1 | #DIV/0! | 1 | #DIV/0! |
| Gm7550 665239        | -1 | #DIV/0! | 1 | #DIV/0! |
| Tmprss11c 435845     | -1 | #DIV/0! | 1 | #DIV/0! |
| Krtap4-8 665992      | -1 | #DIV/0! | 1 | #DIV/0! |
| 1700008I05Rik 71841  | -1 | #DIV/0! | 1 | #DIV/0! |
| Tmprss12 75002       | -1 | #DIV/0! | 1 | #DIV/0! |
| Sct 20287            | -1 | #DIV/0! | 1 | #DIV/0! |
| 4933425O20Rik 66766  | -1 | #DIV/0! | 1 | #DIV/0! |
| Pcsk1 18548          | -1 | #DIV/0! | 1 | #DIV/0! |
| Gpha2 170458         | -1 | #DIV/0! | 1 | #DIV/0! |
| D730048I06Rik 68171  | -1 | #DIV/0! | 1 | #DIV/0! |
| Olfr669 259045       | -1 | #DIV/0! | 1 | #DIV/0! |
| Mir1960 100316709    | -1 | #DIV/0! | 1 | #DIV/0! |
| Six6 20476           | -1 | #DIV/0! | 1 | #DIV/0! |
| Vmn1r192 252907      | -1 | #DIV/0! | 1 | #DIV/0! |
| Acsbg2 328845        | -1 | #DIV/0! | 1 | #DIV/0! |
| Zscan4d 545913       | -1 | #DIV/0! | 1 | #DIV/0! |
| Gdap1 14545          | -1 | #DIV/0! | 1 | #DIV/0! |
| Pmch 110312          | -1 | #DIV/0! | 1 | #DIV/0! |
| Vmn2r89 22301        | -1 | #DIV/0! | 1 | #DIV/0! |
| 6820408C15Rik 228778 | -1 | #DIV/0! | 1 | #DIV/0! |
| Sphkap 77629         | -1 | #DIV/0! | 1 | #DIV/0! |
| Nxph2 18232          | -1 | #DIV/0! | 1 | #DIV/0! |
| Vmn2r104 22313       | -1 | #DIV/0! | 1 | #DIV/0! |
| Vmn1r181 404289      | -1 | #DIV/0! | 1 | #DIV/0! |
| Mir125b-2 723952     | -1 | #DIV/0! | 1 | #DIV/0! |
| Tpbpa 21984          | -1 | #DIV/0! | 1 | #DIV/0! |
| Klk1b22 13646        | -1 | #DIV/0! | 1 | #DIV/0! |
| Tas2r129 387354      | -1 | #DIV/0! | 1 | #DIV/0! |
| Rhox3b 100135653     | -1 | #DIV/0! | 1 | #DIV/0! |
| Vmn1r211 171277      | -1 | #DIV/0! | 1 | #DIV/0! |
| Tas2r119 57254       | -1 | #DIV/0! | 1 | #DIV/0! |
| Lmx1b 16917          | -1 | #DIV/0! | 1 | #DIV/0! |
| Gpr85 64450          | -1 | #DIV/0! | 1 | #DIV/0! |
| 4932429P05Rik 245509 | -1 | #DIV/0! | 1 | #DIV/0! |
| Gm7168 635895        | -1 | #DIV/0! | 1 | #DIV/0! |
| Dmrtc1c2 668357      | -1 | #DIV/0! | 1 | #DIV/0! |
| Taf7 74469           | -1 | #DIV/0! | 1 | #DIV/0! |
| Frem3 333315         | -1 | #DIV/0! | 1 | #DIV/0! |
| Olfr356 258617       | -1 | #DIV/0! | 1 | #DIV/0! |
| Rhox3g-ps 546294     | -1 | #DIV/0! | 1 | #DIV/0! |
| Nkain3 269513        | -1 | #DIV/0! | 1 | #DIV/0! |
| Gucy2f 245650        | -1 | #DIV/0! | 1 | #DIV/0! |
| Lypd3 72434          | -1 | #DIV/0! | 1 | #DIV/0! |
| Tas2r124 387351      | -1 | #DIV/0! | 1 | #DIV/0! |
| Olfr374 258335       | -1 | #DIV/0! | 1 | #DIV/0! |
| Phox2a 11859         | -1 | #DIV/0! | 1 | #DIV/0! |
| Gm4371 100043335     | -1 | #DIV/0! | 1 | #DIV/0! |
| Pcdha9 192161        | -1 | #DIV/0! | 1 | #DIV/0! |

|                      |    |         |   |         |
|----------------------|----|---------|---|---------|
| 1700084J12Rik 73486  | -1 | #DIV/0! | 1 | #DIV/0! |
| Slc13a1 55961        | -1 | #DIV/0! | 1 | #DIV/0! |
| Krt6b 16688          | -1 | #DIV/0! | 1 | #DIV/0! |
| Gm1604b 381059       | -1 | #DIV/0! | 1 | #DIV/0! |
| 4832428D23Rik 403183 | -1 | #DIV/0! | 1 | #DIV/0! |
| Olfr603 259073       | -1 | #DIV/0! | 1 | #DIV/0! |
| Olfr480 56861        | -1 | #DIV/0! | 1 | #DIV/0! |
| Rhox12 382282        | -1 | #DIV/0! | 1 | #DIV/0! |
| Upk3a 22270          | -1 | #DIV/0! | 1 | #DIV/0! |
| Gm14316 641368       | -1 | #DIV/0! | 1 | #DIV/0! |
| Olfr1491 258342      | -1 | #DIV/0! | 1 | #DIV/0! |
| Tprg 71338           | -1 | #DIV/0! | 1 | #DIV/0! |
| Magea8 17144         | -1 | #DIV/0! | 1 | #DIV/0! |
| Gm381 214308         | -1 | #DIV/0! | 1 | #DIV/0! |
| Atp8b3 67331         | -1 | #DIV/0! | 1 | #DIV/0! |
| Kcnj4 16520          | -1 | #DIV/0! | 1 | #DIV/0! |
| Vmn1r60 636697       | -1 | #DIV/0! | 1 | #DIV/0! |
| Snora81 100217420    | -1 | #DIV/0! | 1 | #DIV/0! |
| Snord23 100217441    | -1 | #DIV/0! | 1 | #DIV/0! |
| Gucy2d 14918         | -1 | #DIV/0! | 1 | #DIV/0! |
| Mir129-2 723953      | -1 | #DIV/0! | 1 | #DIV/0! |
| Defb12 77674         | -1 | #DIV/0! | 1 | #DIV/0! |
| Olfr589 259054       | -1 | #DIV/0! | 1 | #DIV/0! |
| Klk1b24 16617        | -1 | #DIV/0! | 1 | #DIV/0! |
| Vip 22353            | -1 | #DIV/0! | 1 | #DIV/0! |
| Mir743 100049546     | -1 | #DIV/0! | 1 | #DIV/0! |
| Mir344c 100526506    | -1 | #DIV/0! | 1 | #DIV/0! |
| H2-M11 224754        | -1 | #DIV/0! | 1 | #DIV/0! |
| Olfr152 258640       | -1 | #DIV/0! | 1 | #DIV/0! |
| Olfr1249 257984      | -1 | #DIV/0! | 1 | #DIV/0! |
| Hhatl 74770          | -1 | #DIV/0! | 1 | #DIV/0! |
| Ghrh 14601           | -1 | #DIV/0! | 1 | #DIV/0! |
| Vmn2r3 637004        | -1 | #DIV/0! | 1 | #DIV/0! |
| Kncn 654462          | -1 | #DIV/0! | 1 | #DIV/0! |
| 2310042E22Rik 66561  | -1 | #DIV/0! | 1 | #DIV/0! |
| Olfr1354 259163      | -1 | #DIV/0! | 1 | #DIV/0! |
| Pfpl 56093           | -1 | #DIV/0! | 1 | #DIV/0! |
| Fgf8 14179           | -1 | #DIV/0! | 1 | #DIV/0! |
| Htr6 15565           | -1 | #DIV/0! | 1 | #DIV/0! |
| Gm436 230890         | -1 | #DIV/0! | 1 | #DIV/0! |
| Mir133a-1 387151     | -1 | #DIV/0! | 1 | #DIV/0! |
| Gm4858 229571        | -1 | #DIV/0! | 1 | #DIV/0! |
| Olfr447 258990       | -1 | #DIV/0! | 1 | #DIV/0! |
| 1700034O15Rik 76606  | -1 | #DIV/0! | 1 | #DIV/0! |
| Gm97 225923          | -1 | #DIV/0! | 1 | #DIV/0! |
| Olfr2 18317          | -1 | #DIV/0! | 1 | #DIV/0! |
| Klri2 320407         | -1 | #DIV/0! | 1 | #DIV/0! |
| Irx2 16372           | -1 | #DIV/0! | 1 | #DIV/0! |
| 1700041C23Rik 67319  | -1 | #DIV/0! | 1 | #DIV/0! |
| Serpib11 66957       | -1 | #DIV/0! | 1 | #DIV/0! |
| Clec2e 232409        | -1 | #DIV/0! | 1 | #DIV/0! |
| 9630013A20Rik 319903 | -1 | #DIV/0! | 1 | #DIV/0! |
| Pla2g4d 78390        | -1 | #DIV/0! | 1 | #DIV/0! |

|                      |    |         |   |         |
|----------------------|----|---------|---|---------|
| Prph2 19133          | -1 | #DIV/0! | 1 | #DIV/0! |
| Epgn 71920           | -1 | #DIV/0! | 1 | #DIV/0! |
| Psg16 26436          | -1 | #DIV/0! | 1 | #DIV/0! |
| Clvs2 215890         | -1 | #DIV/0! | 1 | #DIV/0! |
| Krtap9-1 16705       | -1 | #DIV/0! | 1 | #DIV/0! |
| 4933415F23Rik 66755  | -1 | #DIV/0! | 1 | #DIV/0! |
| Hyal4 77042          | -1 | #DIV/0! | 1 | #DIV/0! |
| Otop1 21906          | -1 | #DIV/0! | 1 | #DIV/0! |
| Klra22 93969         | -1 | #DIV/0! | 1 | #DIV/0! |
| 4930583H14Rik 67749  | -1 | #DIV/0! | 1 | #DIV/0! |
| Lgsn 266744          | -1 | #DIV/0! | 1 | #DIV/0! |
| Dppa1 347708         | -1 | #DIV/0! | 1 | #DIV/0! |
| Olfr1240 258804      | -1 | #DIV/0! | 1 | #DIV/0! |
| Kcnh5 238271         | -1 | #DIV/0! | 1 | #DIV/0! |
| Mir350 723921        | -1 | #DIV/0! | 1 | #DIV/0! |
| Mir181c 723819       | -1 | #DIV/0! | 1 | #DIV/0! |
| Trnp1 69539          | -1 | #DIV/0! | 1 | #DIV/0! |
| Ascl2 17173          | -1 | #DIV/0! | 1 | #DIV/0! |
| Pdzrn4 239618        | -1 | #DIV/0! | 1 | #DIV/0! |
| Olfr483 258730       | -1 | #DIV/0! | 1 | #DIV/0! |
| Zfp92 22754          | -1 | #DIV/0! | 1 | #DIV/0! |
| Mir107 723826        | -1 | #DIV/0! | 1 | #DIV/0! |
| Olfr915 258781       | -1 | #DIV/0! | 1 | #DIV/0! |
| Nhlh1 18071          | -1 | #DIV/0! | 1 | #DIV/0! |
| Olfr794 258375       | -1 | #DIV/0! | 1 | #DIV/0! |
| Txndc2 213272        | -1 | #DIV/0! | 1 | #DIV/0! |
| Olfr338 258949       | -1 | #DIV/0! | 1 | #DIV/0! |
| Neurod1 18012        | -1 | #DIV/0! | 1 | #DIV/0! |
| Nebi 74103           | -1 | #DIV/0! | 1 | #DIV/0! |
| Psg28 114871         | -1 | #DIV/0! | 1 | #DIV/0! |
| Olfr131 258867       | -1 | #DIV/0! | 1 | #DIV/0! |
| Fcnb 14134           | -1 | #DIV/0! | 1 | #DIV/0! |
| Tmprss11d 231382     | -1 | #DIV/0! | 1 | #DIV/0! |
| Gm10318 622629       | -1 | #DIV/0! | 1 | #DIV/0! |
| Gabrg2 14406         | -1 | #DIV/0! | 1 | #DIV/0! |
| Iqcf5 75470          | -1 | #DIV/0! | 1 | #DIV/0! |
| Gm11756 623281       | -1 | #DIV/0! | 1 | #DIV/0! |
| Skint2 329919        | -1 | #DIV/0! | 1 | #DIV/0! |
| Defb10 246085        | -1 | #DIV/0! | 1 | #DIV/0! |
| BC051665 218275      | -1 | #DIV/0! | 1 | #DIV/0! |
| Srgap1 117600        | -1 | #DIV/0! | 1 | #DIV/0! |
| 1700013D24Rik 76921  | -1 | #DIV/0! | 1 | #DIV/0! |
| Sec14l3 380683       | -1 | #DIV/0! | 1 | #DIV/0! |
| Olfr747 258264       | -1 | #DIV/0! | 1 | #DIV/0! |
| 1700054K19Rik 67336  | -1 | #DIV/0! | 1 | #DIV/0! |
| Olfr616 259103       | -1 | #DIV/0! | 1 | #DIV/0! |
| Olfr1195 258748      | -1 | #DIV/0! | 1 | #DIV/0! |
| Olfr1231 258446      | -1 | #DIV/0! | 1 | #DIV/0! |
| Tlr8 170744          | -1 | #DIV/0! | 1 | #DIV/0! |
| Gsdma3 450219        | -1 | #DIV/0! | 1 | #DIV/0! |
| Mir340 723845        | -1 | #DIV/0! | 1 | #DIV/0! |
| Rgs7bp 52882         | -1 | #DIV/0! | 1 | #DIV/0! |
| 2010107G12Rik 243753 | -1 | #DIV/0! | 1 | #DIV/0! |

|                      |    |         |   |         |
|----------------------|----|---------|---|---------|
| Grxcr2 332309        | -1 | #DIV/0! | 1 | #DIV/0! |
| Sgcd 24052           | -1 | #DIV/0! | 1 | #DIV/0! |
| Cga 12640            | -1 | #DIV/0! | 1 | #DIV/0! |
| 2900092D14Rik 73100  | -1 | #DIV/0! | 1 | #DIV/0! |
| Olfr521 258353       | -1 | #DIV/0! | 1 | #DIV/0! |
| Gbx1 231044          | -1 | #DIV/0! | 1 | #DIV/0! |
| Gpr176 381413        | -1 | #DIV/0! | 1 | #DIV/0! |
| Cts7 56092           | -1 | #DIV/0! | 1 | #DIV/0! |
| Olfr448 258270       | -1 | #DIV/0! | 1 | #DIV/0! |
| Rhox13 73614         | -1 | #DIV/0! | 1 | #DIV/0! |
| Krtap11-1 16693      | -1 | #DIV/0! | 1 | #DIV/0! |
| Mir344 723931        | -1 | #DIV/0! | 1 | #DIV/0! |
| Ifna13 230396        | -1 | #DIV/0! | 1 | #DIV/0! |
| Pcdhgb7 93704        | -1 | #DIV/0! | 1 | #DIV/0! |
| Olfr354 258941       | -1 | #DIV/0! | 1 | #DIV/0! |
| Gphb5 217674         | -1 | #DIV/0! | 1 | #DIV/0! |
| Fam19a4 320701       | -1 | #DIV/0! | 1 | #DIV/0! |
| Mir185 387180        | -1 | #DIV/0! | 1 | #DIV/0! |
| Gm8300 666806        | -1 | #DIV/0! | 1 | #DIV/0! |
| Slc26a4 23985        | -1 | #DIV/0! | 1 | #DIV/0! |
| Slc25a31 73333       | -1 | #DIV/0! | 1 | #DIV/0! |
| Olfr1238 258786      | -1 | #DIV/0! | 1 | #DIV/0! |
| Krtap5-5 114666      | -1 | #DIV/0! | 1 | #DIV/0! |
| Scube3 268935        | -1 | #DIV/0! | 1 | #DIV/0! |
| Fbxo40 207215        | -1 | #DIV/0! | 1 | #DIV/0! |
| Olfr90 258469        | -1 | #DIV/0! | 1 | #DIV/0! |
| Osta 106407          | -1 | #DIV/0! | 1 | #DIV/0! |
| Pramel7 347712       | -1 | #DIV/0! | 1 | #DIV/0! |
| Serpinb9e 20710      | -1 | #DIV/0! | 1 | #DIV/0! |
| Olfr692 258352       | -1 | #DIV/0! | 1 | #DIV/0! |
| Dlx2 13392           | -1 | #DIV/0! | 1 | #DIV/0! |
| Fut4-ps1 14346       | -1 | #DIV/0! | 1 | #DIV/0! |
| Olfr394 259009       | -1 | #DIV/0! | 1 | #DIV/0! |
| Ghsr 208188          | -1 | #DIV/0! | 1 | #DIV/0! |
| Mir34c 723932        | -1 | #DIV/0! | 1 | #DIV/0! |
| Hepacam2 101202      | -1 | #DIV/0! | 1 | #DIV/0! |
| Gm14092 627302       | -1 | #DIV/0! | 1 | #DIV/0! |
| Olfr791 258932       | -1 | #DIV/0! | 1 | #DIV/0! |
| Srd5a2 94224         | -1 | #DIV/0! | 1 | #DIV/0! |
| Ccdc113 244608       | -1 | #DIV/0! | 1 | #DIV/0! |
| Htr3b 57014          | -1 | #DIV/0! | 1 | #DIV/0! |
| 9230102K24Rik 109335 | -1 | #DIV/0! | 1 | #DIV/0! |
| Mir3101 100526505    | -1 | #DIV/0! | 1 | #DIV/0! |
| Gm4776 212225        | -1 | #DIV/0! | 1 | #DIV/0! |
| Trap1a 22037         | -1 | #DIV/0! | 1 | #DIV/0! |
| Mir495 751522        | -1 | #DIV/0! | 1 | #DIV/0! |
| Al504432 229694      | -1 | #DIV/0! | 1 | #DIV/0! |
| Mlana 77836          | -1 | #DIV/0! | 1 | #DIV/0! |
| Mir204 387200        | -1 | #DIV/0! | 1 | #DIV/0! |
| Adam26b 382007       | -1 | #DIV/0! | 1 | #DIV/0! |
| Olfr1113 404327      | -1 | #DIV/0! | 1 | #DIV/0! |
| Olfr741 258233       | -1 | #DIV/0! | 1 | #DIV/0! |
| Gm15308 100041890    | -1 | #DIV/0! | 1 | #DIV/0! |

|                      |    |         |   |         |
|----------------------|----|---------|---|---------|
| 4933407P14Rik 237958 | -1 | #DIV/0! | 1 | #DIV/0! |
| Gm7157 635396        | -1 | #DIV/0! | 1 | #DIV/0! |
| Prl8a8 74188         | -1 | #DIV/0! | 1 | #DIV/0! |
| Defb26 654457        | -1 | #DIV/0! | 1 | #DIV/0! |
| Wfdc5 209232         | -1 | #DIV/0! | 1 | #DIV/0! |
| Mir1188 100316669    | -1 | #DIV/0! | 1 | #DIV/0! |
| Ttc9b 73032          | -1 | #DIV/0! | 1 | #DIV/0! |
| Olfr786 258542       | -1 | #DIV/0! | 1 | #DIV/0! |
| Otp 18420            | -1 | #DIV/0! | 1 | #DIV/0! |
| Kif27 75050          | -1 | #DIV/0! | 1 | #DIV/0! |
| Dmp1 13406           | -1 | #DIV/0! | 1 | #DIV/0! |
| Bmp3 110075          | -1 | #DIV/0! | 1 | #DIV/0! |
| 2300002M23Rik 69542  | -1 | #DIV/0! | 1 | #DIV/0! |
| Abpe 381970          | -1 | #DIV/0! | 1 | #DIV/0! |
| Cartpt 27220         | -1 | #DIV/0! | 1 | #DIV/0! |
| Krtap12-1 16694      | -1 | #DIV/0! | 1 | #DIV/0! |
| Gabra2 14395         | -1 | #DIV/0! | 1 | #DIV/0! |
| Gzme 14942           | -1 | #DIV/0! | 1 | #DIV/0! |
| Ucn2 171530          | -1 | #DIV/0! | 1 | #DIV/0! |
| B3galt5 93961        | -1 | #DIV/0! | 1 | #DIV/0! |
| Pramef17 626943      | -1 | #DIV/0! | 1 | #DIV/0! |
| Slc22a13 102570      | -1 | #DIV/0! | 1 | #DIV/0! |
| Olfr724 258485       | -1 | #DIV/0! | 1 | #DIV/0! |
| Acrv1 11451          | -1 | #DIV/0! | 1 | #DIV/0! |
| Ppp1r27 68701        | -1 | #DIV/0! | 1 | #DIV/0! |
| Vmn1r172 81010       | -1 | #DIV/0! | 1 | #DIV/0! |
| Olfr477 258928       | -1 | #DIV/0! | 1 | #DIV/0! |
| Gpr62 436090         | -1 | #DIV/0! | 1 | #DIV/0! |
| Mir3475 100499512    | -1 | #DIV/0! | 1 | #DIV/0! |
| Gm6878 628416        | -1 | #DIV/0! | 1 | #DIV/0! |
| 1700044K03Rik 67321  | -1 | #DIV/0! | 1 | #DIV/0! |
| Gm6042 574415        | -1 | #DIV/0! | 1 | #DIV/0! |
| Olfr181 259001       | -1 | #DIV/0! | 1 | #DIV/0! |
| Mmp20 30800          | -1 | #DIV/0! | 1 | #DIV/0! |
| Vmn1r175 622222      | -1 | #DIV/0! | 1 | #DIV/0! |
| Vmn2r44 434113       | -1 | #DIV/0! | 1 | #DIV/0! |
| Cd200r2 271375       | -1 | #DIV/0! | 1 | #DIV/0! |
| Ccdc146 75172        | -1 | #DIV/0! | 1 | #DIV/0! |
| Prokr2 246313        | -1 | #DIV/0! | 1 | #DIV/0! |
| Olfr805 258548       | -1 | #DIV/0! | 1 | #DIV/0! |
| Wbscr28 76629        | -1 | #DIV/0! | 1 | #DIV/0! |
| Atp2b3 320707        | -1 | #DIV/0! | 1 | #DIV/0! |
| Vmn2r71 233445       | -1 | #DIV/0! | 1 | #DIV/0! |
| Glipr1l2 67537       | -1 | #DIV/0! | 1 | #DIV/0! |
| Fbl1 237730          | -1 | #DIV/0! | 1 | #DIV/0! |
| Pinc 723792          | -1 | #DIV/0! | 1 | #DIV/0! |
| Gabrb2 14401         | -1 | #DIV/0! | 1 | #DIV/0! |
| Snord58b 100217457   | -1 | #DIV/0! | 1 | #DIV/0! |
| 1700058G18Rik 67342  | -1 | #DIV/0! | 1 | #DIV/0! |
| Art5 11875           | -1 | #DIV/0! | 1 | #DIV/0! |
| Krt6a 16687          | -1 | #DIV/0! | 1 | #DIV/0! |
| Prss39 21755         | -1 | #DIV/0! | 1 | #DIV/0! |
| Ces5a 67935          | -1 | #DIV/0! | 1 | #DIV/0! |

|                     |    |         |   |         |
|---------------------|----|---------|---|---------|
| Izumo1 73456        | -1 | #DIV/0! | 1 | #DIV/0! |
| Fpr-rs4 14291       | -1 | #DIV/0! | 1 | #DIV/0! |
| Cabp5 29865         | -1 | #DIV/0! | 1 | #DIV/0! |
| Myo3a 667663        | -1 | #DIV/0! | 1 | #DIV/0! |
| Gm813 328695        | -1 | #DIV/0! | 1 | #DIV/0! |
| Olfr820 258670      | -1 | #DIV/0! | 1 | #DIV/0! |
| Defb38 360212       | -1 | #DIV/0! | 1 | #DIV/0! |
| Mir365-1 723899     | -1 | #DIV/0! | 1 | #DIV/0! |
| Gm9125 668359       | -1 | #DIV/0! | 1 | #DIV/0! |
| Lcn9 77704          | -1 | #DIV/0! | 1 | #DIV/0! |
| Olfr813 258252      | -1 | #DIV/0! | 1 | #DIV/0! |
| Mir135a-2 723955    | -1 | #DIV/0! | 1 | #DIV/0! |
| Npffr2 104443       | -1 | #DIV/0! | 1 | #DIV/0! |
| Vax2os2 545859      | -1 | #DIV/0! | 1 | #DIV/0! |
| Pcdha4 12936        | -1 | #DIV/0! | 1 | #DIV/0! |
| Vmn1r206 171250     | -1 | #DIV/0! | 1 | #DIV/0! |
| Noto 384452         | -1 | #DIV/0! | 1 | #DIV/0! |
| Casr 12374          | -1 | #DIV/0! | 1 | #DIV/0! |
| Has2as 594843       | -1 | #DIV/0! | 1 | #DIV/0! |
| 5031426D15Rik 68144 | -1 | #DIV/0! | 1 | #DIV/0! |
| Vmn2r45 100042810   | -1 | #DIV/0! | 1 | #DIV/0! |
| Fbxw16 320083       | -1 | #DIV/0! | 1 | #DIV/0! |
| Ankrd29 225187      | -1 | #DIV/0! | 1 | #DIV/0! |
| Defb6 116746        | -1 | #DIV/0! | 1 | #DIV/0! |
| Olfr1389 259069     | -1 | #DIV/0! | 1 | #DIV/0! |
| Hes3 15207          | -1 | #DIV/0! | 1 | #DIV/0! |
| Acan 11595          | -1 | #DIV/0! | 1 | #DIV/0! |
| 9530002B09Rik 77432 | -1 | #DIV/0! | 1 | #DIV/0! |
| Klk12 69511         | -1 | #DIV/0! | 1 | #DIV/0! |
| Arr3 170735         | -1 | #DIV/0! | 1 | #DIV/0! |
| Gm11563 100040248   | -1 | #DIV/0! | 1 | #DIV/0! |
| Gm12169 210535      | -1 | #DIV/0! | 1 | #DIV/0! |
| Tsx 22127           | -1 | #DIV/0! | 1 | #DIV/0! |
| Lipf 67717          | -1 | #DIV/0! | 1 | #DIV/0! |
| Ror2 26564          | -1 | #DIV/0! | 1 | #DIV/0! |
| Sox21 223227        | -1 | #DIV/0! | 1 | #DIV/0! |
| Olfr308 258614      | -1 | #DIV/0! | 1 | #DIV/0! |
| Mir3091 100526556   | -1 | #DIV/0! | 1 | #DIV/0! |
| Krtap10-10 544710   | -1 | #DIV/0! | 1 | #DIV/0! |
| Pnma3 245468        | -1 | #DIV/0! | 1 | #DIV/0! |
| Gm17689 100312948   | -1 | #DIV/0! | 1 | #DIV/0! |
| Klra3 16634         | -1 | #DIV/0! | 1 | #DIV/0! |
| Hist4h4 320332      | -1 | #DIV/0! | 1 | #DIV/0! |
| Vmn1r236 171235     | -1 | #DIV/0! | 1 | #DIV/0! |
| Gp2 67133           | -1 | #DIV/0! | 1 | #DIV/0! |
| Olfr1532-ps1 258173 | -1 | #DIV/0! | 1 | #DIV/0! |
| Eras 353283         | -1 | #DIV/0! | 1 | #DIV/0! |
| Smgc 223809         | -1 | #DIV/0! | 1 | #DIV/0! |
| Gira1 14654         | -1 | #DIV/0! | 1 | #DIV/0! |
| Dusp15 252864       | -1 | #DIV/0! | 1 | #DIV/0! |
| Olfr1301 258889     | -1 | #DIV/0! | 1 | #DIV/0! |
| Trim55 381485       | -1 | #DIV/0! | 1 | #DIV/0! |
| Prl3b1 18776        | -1 | #DIV/0! | 1 | #DIV/0! |

|                      |    |         |   |         |
|----------------------|----|---------|---|---------|
| 2010005H15Rik 76770  | -1 | #DIV/0! | 1 | #DIV/0! |
| Olfr1511 258268      | -1 | #DIV/0! | 1 | #DIV/0! |
| Vmn1r126 100043013   | -1 | #DIV/0! | 1 | #DIV/0! |
| Defb23 629114        | -1 | #DIV/0! | 1 | #DIV/0! |
| Tnfsf18 240873       | -1 | #DIV/0! | 1 | #DIV/0! |
| Prss1 114228         | -1 | #DIV/0! | 1 | #DIV/0! |
| Gm6460 623898        | -1 | #DIV/0! | 1 | #DIV/0! |
| Tmem63c 217733       | -1 | #DIV/0! | 1 | #DIV/0! |
| C87414 381654        | -1 | #DIV/0! | 1 | #DIV/0! |
| Mir16-2 723949       | -1 | #DIV/0! | 1 | #DIV/0! |
| Olfr214 258754       | -1 | #DIV/0! | 1 | #DIV/0! |
| Olfr730 258486       | -1 | #DIV/0! | 1 | #DIV/0! |
| Igsf9b 235086        | -1 | #DIV/0! | 1 | #DIV/0! |
| 4931409K22Rik 231045 | -1 | #DIV/0! | 1 | #DIV/0! |
| 2310005G13Rik 69457  | -1 | #DIV/0! | 1 | #DIV/0! |
| Vmn2r90 626942       | -1 | #DIV/0! | 1 | #DIV/0! |
| Tas2r130 387355      | -1 | #DIV/0! | 1 | #DIV/0! |
| Krtap5-4 50775       | -1 | #DIV/0! | 1 | #DIV/0! |
| 1700121N20Rik 76639  | -1 | #DIV/0! | 1 | #DIV/0! |
| Atp6v1c2 68775       | -1 | #DIV/0! | 1 | #DIV/0! |
| Olfr632 259123       | -1 | #DIV/0! | 1 | #DIV/0! |
| Gm5105 329763        | -1 | #DIV/0! | 1 | #DIV/0! |
| 2310033E01Rik 641361 | -1 | #DIV/0! | 1 | #DIV/0! |
| Sez6 20370           | -1 | #DIV/0! | 1 | #DIV/0! |
| Myod1 17927          | -1 | #DIV/0! | 1 | #DIV/0! |
| 4933405L10Rik 71046  | -1 | #DIV/0! | 1 | #DIV/0! |
| Iqcf6 100041096      | -1 | #DIV/0! | 1 | #DIV/0! |
| Tdrd9 74691          | -1 | #DIV/0! | 1 | #DIV/0! |
| Slc12a1 20495        | -1 | #DIV/0! | 1 | #DIV/0! |
| Olfr885 257885       | -1 | #DIV/0! | 1 | #DIV/0! |
| Olfr382 258435       | -1 | #DIV/0! | 1 | #DIV/0! |
| Olfr933 258433       | -1 | #DIV/0! | 1 | #DIV/0! |
| 1110032A04Rik 66183  | -1 | #DIV/0! | 1 | #DIV/0! |
| Olfr143 258802       | -1 | #DIV/0! | 1 | #DIV/0! |
| 1700012B07Rik 69324  | -1 | #DIV/0! | 1 | #DIV/0! |
| Stfa211 268885       | -1 | #DIV/0! | 1 | #DIV/0! |
| Mir717 751531        | -1 | #DIV/0! | 1 | #DIV/0! |
| Snord1a 100216538    | -1 | #DIV/0! | 1 | #DIV/0! |
| Prl7d1 18814         | -1 | #DIV/0! | 1 | #DIV/0! |
| 1700029H14Rik 66501  | -1 | #DIV/0! | 1 | #DIV/0! |
| 4930521A18Rik 74708  | -1 | #DIV/0! | 1 | #DIV/0! |
| Mir687 751541        | -1 | #DIV/0! | 1 | #DIV/0! |
| Gprc5d 93746         | -1 | #DIV/0! | 1 | #DIV/0! |
| Prss48 368202        | -1 | #DIV/0! | 1 | #DIV/0! |
| Itgad 381924         | -1 | #DIV/0! | 1 | #DIV/0! |
| 1700016D06Rik 76413  | -1 | #DIV/0! | 1 | #DIV/0! |
| 4921524L21Rik 70901  | -1 | #DIV/0! | 1 | #DIV/0! |
| Kcnd2 16508          | -1 | #DIV/0! | 1 | #DIV/0! |
| Fbxo15 50764         | -1 | #DIV/0! | 1 | #DIV/0! |
| Rax 19434            | -1 | #DIV/0! | 1 | #DIV/0! |
| Kctd8 243043         | -1 | #DIV/0! | 1 | #DIV/0! |
| Olfr935 258741       | -1 | #DIV/0! | 1 | #DIV/0! |
| Gm10400 100093700    | -1 | #DIV/0! | 1 | #DIV/0! |



|                     |    |         |   |         |
|---------------------|----|---------|---|---------|
| Olfr159 29849       | -1 | #DIV/0! | 1 | #DIV/0! |
| Mir802 791074       | -1 | #DIV/0! | 1 | #DIV/0! |
| Olfr305 258609      | -1 | #DIV/0! | 1 | #DIV/0! |
| Olfr142 406186      | -1 | #DIV/0! | 1 | #DIV/0! |
| Olfr1135 258654     | -1 | #DIV/0! | 1 | #DIV/0! |
| Mobp 17433          | -1 | #DIV/0! | 1 | #DIV/0! |
| Sfrp2 20319         | -1 | #DIV/0! | 1 | #DIV/0! |
| BC049352 408059     | -1 | #DIV/0! | 1 | #DIV/0! |
| Prl3d3 215029       | -1 | #DIV/0! | 1 | #DIV/0! |
| Gm13749 433315      | -1 | #DIV/0! | 1 | #DIV/0! |
| Zfp345 545471       | -1 | #DIV/0! | 1 | #DIV/0! |
| S100z 268686        | -1 | #DIV/0! | 1 | #DIV/0! |
| Mir125b-1 387236    | -1 | #DIV/0! | 1 | #DIV/0! |
| Srsf12 272009       | -1 | #DIV/0! | 1 | #DIV/0! |
| Mir1942 100316774   | -1 | #DIV/0! | 1 | #DIV/0! |
| Olfr558 259097      | -1 | #DIV/0! | 1 | #DIV/0! |
| Olfr350 258620      | -1 | #DIV/0! | 1 | #DIV/0! |
| Hoxa11 15396        | -1 | #DIV/0! | 1 | #DIV/0! |
| Mir679 751539       | -1 | #DIV/0! | 1 | #DIV/0! |
| Olfr1204 258455     | -1 | #DIV/0! | 1 | #DIV/0! |
| Pax6 18508          | -1 | #DIV/0! | 1 | #DIV/0! |
| Vmn2r73 620928      | -1 | #DIV/0! | 1 | #DIV/0! |
| Rasgef1c 74563      | -1 | #DIV/0! | 1 | #DIV/0! |
| Pip5kl1 227733      | -1 | #DIV/0! | 1 | #DIV/0! |
| Ccdc129 232016      | -1 | #DIV/0! | 1 | #DIV/0! |
| Vmn1r137 100043614  | -1 | #DIV/0! | 1 | #DIV/0! |
| Olfr617 258838      | -1 | #DIV/0! | 1 | #DIV/0! |
| Pax4 18506          | -1 | #DIV/0! | 1 | #DIV/0! |
| Apol10b 328561      | -1 | #DIV/0! | 1 | #DIV/0! |
| Kremen2 73016       | -1 | #DIV/0! | 1 | #DIV/0! |
| Tdpoz4 399675       | -1 | #DIV/0! | 1 | #DIV/0! |
| Gm1973 100038846    | -1 | #DIV/0! | 1 | #DIV/0! |
| Prss34 328780       | -1 | #DIV/0! | 1 | #DIV/0! |
| 1700012A03Rik 76382 | -1 | #DIV/0! | 1 | #DIV/0! |
| Olfr1413 259039     | -1 | #DIV/0! | 1 | #DIV/0! |
| Snora33 100529074   | -1 | #DIV/0! | 1 | #DIV/0! |
| Ccdc155 384619      | -1 | #DIV/0! | 1 | #DIV/0! |
| Mir3110 100526512   | -1 | #DIV/0! | 1 | #DIV/0! |
| Wisp3 327743        | -1 | #DIV/0! | 1 | #DIV/0! |
| Slc5a7 63993        | -1 | #DIV/0! | 1 | #DIV/0! |
| Glt6d1 71103        | -1 | #DIV/0! | 1 | #DIV/0! |
| P2rx2 231602        | -1 | #DIV/0! | 1 | #DIV/0! |
| Spesp1 66712        | -1 | #DIV/0! | 1 | #DIV/0! |
| Add2 11519          | -1 | #DIV/0! | 1 | #DIV/0! |
| Olfr988 258166      | -1 | #DIV/0! | 1 | #DIV/0! |
| Ifnk 387510         | -1 | #DIV/0! | 1 | #DIV/0! |
| Mir1902 100316678   | -1 | #DIV/0! | 1 | #DIV/0! |
| Oas1h 246729        | -1 | #DIV/0! | 1 | #DIV/0! |
| Olfr557 258358      | -1 | #DIV/0! | 1 | #DIV/0! |
| Col9a1 12839        | -1 | #DIV/0! | 1 | #DIV/0! |
| Mir34a 723848       | -1 | #DIV/0! | 1 | #DIV/0! |
| Olfr877 258412      | -1 | #DIV/0! | 1 | #DIV/0! |
| Kcnn3 140493        | -1 | #DIV/0! | 1 | #DIV/0! |

|                      |    |         |   |         |
|----------------------|----|---------|---|---------|
| Mill1 266815         | -1 | #DIV/0! | 1 | #DIV/0! |
| Mir344d-2 100526531  | -1 | #DIV/0! | 1 | #DIV/0! |
| Olfr1080 258404      | -1 | #DIV/0! | 1 | #DIV/0! |
| Mir499 735275        | -1 | #DIV/0! | 1 | #DIV/0! |
| Myl7 17898           | -1 | #DIV/0! | 1 | #DIV/0! |
| Vmn1r35 171185       | -1 | #DIV/0! | 1 | #DIV/0! |
| Nme5 75533           | -1 | #DIV/0! | 1 | #DIV/0! |
| Olfr979 259112       | -1 | #DIV/0! | 1 | #DIV/0! |
| Lrrc23 16977         | -1 | #DIV/0! | 1 | #DIV/0! |
| Htr4 15562           | -1 | #DIV/0! | 1 | #DIV/0! |
| Fam59b 242915        | -1 | #DIV/0! | 1 | #DIV/0! |
| Xlr5a 574438         | -1 | #DIV/0! | 1 | #DIV/0! |
| Olfr1246 258788      | -1 | #DIV/0! | 1 | #DIV/0! |
| Golga7b 71146        | -1 | #DIV/0! | 1 | #DIV/0! |
| Olfr628 259159       | -1 | #DIV/0! | 1 | #DIV/0! |
| Wfdc9 629754         | -1 | #DIV/0! | 1 | #DIV/0! |
| Agbl1 244071         | -1 | #DIV/0! | 1 | #DIV/0! |
| Frmppd1 666060       | -1 | #DIV/0! | 1 | #DIV/0! |
| Olfr257 404314       | -1 | #DIV/0! | 1 | #DIV/0! |
| Olfr744 257884       | -1 | #DIV/0! | 1 | #DIV/0! |
| Hist2h2ac 319176     | -1 | #DIV/0! | 1 | #DIV/0! |
| 4933402J07Rik 330820 | -1 | #DIV/0! | 1 | #DIV/0! |
| Myh2 17882           | -1 | #DIV/0! | 1 | #DIV/0! |
| Gm6592 625480        | -1 | #DIV/0! | 1 | #DIV/0! |
| 1700013F07Rik 75504  | -1 | #DIV/0! | 1 | #DIV/0! |
| Pitx1 18740          | -1 | #DIV/0! | 1 | #DIV/0! |
| Serpinb6e 435350     | -1 | #DIV/0! | 1 | #DIV/0! |
| Gm11938 100041412    | -1 | #DIV/0! | 1 | #DIV/0! |
| Pou3f2 18992         | -1 | #DIV/0! | 1 | #DIV/0! |
| Gm20594 100463512    | -1 | #DIV/0! | 1 | #DIV/0! |
| Olfr298 257905       | -1 | #DIV/0! | 1 | #DIV/0! |
| Mir874 100124491     | -1 | #DIV/0! | 1 | #DIV/0! |
| Cst7 13011           | -1 | #DIV/0! | 1 | #DIV/0! |
| Defb46 574081        | -1 | #DIV/0! | 1 | #DIV/0! |
| Pip 18716            | -1 | #DIV/0! | 1 | #DIV/0! |
| Nmur1 14767          | -1 | #DIV/0! | 1 | #DIV/0! |
| Gm8660 667485        | -1 | #DIV/0! | 1 | #DIV/0! |
| Vmn1r26 171190       | -1 | #DIV/0! | 1 | #DIV/0! |
| Snora74a 436583      | -1 | #DIV/0! | 1 | #DIV/0! |
| Vmn2r106 224576      | -1 | #DIV/0! | 1 | #DIV/0! |
| Snora47 100217450    | -1 | #DIV/0! | 1 | #DIV/0! |
| Gapdhs 14447         | -1 | #DIV/0! | 1 | #DIV/0! |
| Gm10324 628709       | -1 | #DIV/0! | 1 | #DIV/0! |
| 4930544G11Rik 67653  | -1 | #DIV/0! | 1 | #DIV/0! |
| Mir1943 100316695    | -1 | #DIV/0! | 1 | #DIV/0! |
| Vmn1r177 384572      | -1 | #DIV/0! | 1 | #DIV/0! |
| Olfr1283 228443      | -1 | #DIV/0! | 1 | #DIV/0! |
| Vmn1r183 209824      | -1 | #DIV/0! | 1 | #DIV/0! |
| Mir128-2 723815      | -1 | #DIV/0! | 1 | #DIV/0! |
| Gm10421 100038689    | -1 | #DIV/0! | 1 | #DIV/0! |
| Kcnv1 67498          | -1 | #DIV/0! | 1 | #DIV/0! |
| Ctnna3 216033        | -1 | #DIV/0! | 1 | #DIV/0! |
| Mir692-1 751529      | -1 | #DIV/0! | 1 | #DIV/0! |

|                      |    |         |   |         |
|----------------------|----|---------|---|---------|
| Pcdhb13 93884        | -1 | #DIV/0! | 1 | #DIV/0! |
| Bhlhe41 79362        | -1 | #DIV/0! | 1 | #DIV/0! |
| Gm5891 545929        | -1 | #DIV/0! | 1 | #DIV/0! |
| 1700011F14Rik 75645  | -1 | #DIV/0! | 1 | #DIV/0! |
| 4930417G10Rik 74855  | -1 | #DIV/0! | 1 | #DIV/0! |
| Zfp735 76390         | -1 | #DIV/0! | 1 | #DIV/0! |
| Olfr578 259119       | -1 | #DIV/0! | 1 | #DIV/0! |
| Mir532 751544        | -1 | #DIV/0! | 1 | #DIV/0! |
| Gpr37 14763          | -1 | #DIV/0! | 1 | #DIV/0! |
| Olfr1202 258454      | -1 | #DIV/0! | 1 | #DIV/0! |
| Scgb3a2 117158       | -1 | #DIV/0! | 1 | #DIV/0! |
| Ica1 70375           | -1 | #DIV/0! | 1 | #DIV/0! |
| Olfr1274-ps 258330   | -1 | #DIV/0! | 1 | #DIV/0! |
| Cntnap2 66797        | -1 | #DIV/0! | 1 | #DIV/0! |
| Hsd17b3 15487        | -1 | #DIV/0! | 1 | #DIV/0! |
| Plac1 225922         | -1 | #DIV/0! | 1 | #DIV/0! |
| Tmem233 545798       | -1 | #DIV/0! | 1 | #DIV/0! |
| Gdnf 14573           | -1 | #DIV/0! | 1 | #DIV/0! |
| Vmn1r125 667215      | -1 | #DIV/0! | 1 | #DIV/0! |
| Gm13103 194225       | -1 | #DIV/0! | 1 | #DIV/0! |
| 1700060C20Rik 73399  | -1 | #DIV/0! | 1 | #DIV/0! |
| Rad21 668929         | -1 | #DIV/0! | 1 | #DIV/0! |
| Mir192 387187        | -1 | #DIV/0! | 1 | #DIV/0! |
| Irgc1 210145         | -1 | #DIV/0! | 1 | #DIV/0! |
| Ptprz1 19283         | -1 | #DIV/0! | 1 | #DIV/0! |
| Olfr611 258722       | -1 | #DIV/0! | 1 | #DIV/0! |
| Ang5 503844          | -1 | #DIV/0! | 1 | #DIV/0! |
| A630073D07Rik 381819 | -1 | #DIV/0! | 1 | #DIV/0! |
| Gm9962 791383        | -1 | #DIV/0! | 1 | #DIV/0! |
| Tmem225 75667        | -1 | #DIV/0! | 1 | #DIV/0! |
| Rcvrn 19674          | -1 | #DIV/0! | 1 | #DIV/0! |
| Cryba2 12958         | -1 | #DIV/0! | 1 | #DIV/0! |
| Trim43a 547109       | -1 | #DIV/0! | 1 | #DIV/0! |
| Ssxb9 387131         | -1 | #DIV/0! | 1 | #DIV/0! |
| Mir18 387135         | -1 | #DIV/0! | 1 | #DIV/0! |
| 1110059M19Rik 68800  | -1 | #DIV/0! | 1 | #DIV/0! |
| Trcg1 541610         | -1 | #DIV/0! | 1 | #DIV/0! |
| Gcm2 107889          | -1 | #DIV/0! | 1 | #DIV/0! |
| Krt82 114566         | -1 | #DIV/0! | 1 | #DIV/0! |
| BC061194 381350      | -1 | #DIV/0! | 1 | #DIV/0! |
| Ooep 67968           | -1 | #DIV/0! | 1 | #DIV/0! |
| Klrc2 16642          | -1 | #DIV/0! | 1 | #DIV/0! |
| Mir1907 100316685    | -1 | #DIV/0! | 1 | #DIV/0! |
| Adam5 11499          | -1 | #DIV/0! | 1 | #DIV/0! |
| Mir150 387168        | -1 | #DIV/0! | 1 | #DIV/0! |
| Prl2b1 66392         | -1 | #DIV/0! | 1 | #DIV/0! |
| Mir181b-2 723903     | -1 | #DIV/0! | 1 | #DIV/0! |
| Mir3087 100526555    | -1 | #DIV/0! | 1 | #DIV/0! |
| AF366264 231201      | -1 | #DIV/0! | 1 | #DIV/0! |
| Lzts1 211134         | -1 | #DIV/0! | 1 | #DIV/0! |
| Olfr1381 258461      | -1 | #DIV/0! | 1 | #DIV/0! |
| Fbxw21 320082        | -1 | #DIV/0! | 1 | #DIV/0! |
| Defa-ps12 654452     | -1 | #DIV/0! | 1 | #DIV/0! |

|                      |    |         |   |         |
|----------------------|----|---------|---|---------|
| Mir194-1 387189      | -1 | #DIV/0! | 1 | #DIV/0! |
| Spf2 320277          | -1 | #DIV/0! | 1 | #DIV/0! |
| Brs3 12209           | -1 | #DIV/0! | 1 | #DIV/0! |
| Dsg3 13512           | -1 | #DIV/0! | 1 | #DIV/0! |
| Vmn1r187 100039499   | -1 | #DIV/0! | 1 | #DIV/0! |
| Palm3 74337          | -1 | #DIV/0! | 1 | #DIV/0! |
| Gm6583 625424        | -1 | #DIV/0! | 1 | #DIV/0! |
| Prl2c3 18812         | -1 | #DIV/0! | 1 | #DIV/0! |
| 4932443 19Rik 403185 | -1 | #DIV/0! | 1 | #DIV/0! |
| Ucn 22226            | -1 | #DIV/0! | 1 | #DIV/0! |
| 4930529M08Rik 78774  | -1 | #DIV/0! | 1 | #DIV/0! |
| Gm15127 434866       | -1 | #DIV/0! | 1 | #DIV/0! |
| Mir487b 723940       | -1 | #DIV/0! | 1 | #DIV/0! |
| Dbh 13166            | -1 | #DIV/0! | 1 | #DIV/0! |
| Cplx1 12889          | -1 | #DIV/0! | 1 | #DIV/0! |
| Vmn1r29 113859       | -1 | #DIV/0! | 1 | #DIV/0! |
| Calm4 80796          | -1 | #DIV/0! | 1 | #DIV/0! |
| Xlr4c 72891          | -1 | #DIV/0! | 1 | #DIV/0! |
| Ly6g6f 433099        | -1 | #DIV/0! | 1 | #DIV/0! |
| Kcnk18 332396        | -1 | #DIV/0! | 1 | #DIV/0! |
| Olfr812 258791       | -1 | #DIV/0! | 1 | #DIV/0! |
| Mir494 723878        | -1 | #DIV/0! | 1 | #DIV/0! |
| Gm20410 100126773    | -1 | #DIV/0! | 1 | #DIV/0! |
| Klra12 16630         | -1 | #DIV/0! | 1 | #DIV/0! |
| Olfr1206 258896      | -1 | #DIV/0! | 1 | #DIV/0! |
| Zfp616 327963        | -1 | #DIV/0! | 1 | #DIV/0! |
| Calcb 116903         | -1 | #DIV/0! | 1 | #DIV/0! |
| Snord91a 100217469   | -1 | #DIV/0! | 1 | #DIV/0! |
| Hapln3 67666         | -1 | #DIV/0! | 1 | #DIV/0! |
| Catsper1 225865      | -1 | #DIV/0! | 1 | #DIV/0! |
| Svop 68666           | -1 | #DIV/0! | 1 | #DIV/0! |
| Trim40 195359        | -1 | #DIV/0! | 1 | #DIV/0! |
| Il20 58181           | -1 | #DIV/0! | 1 | #DIV/0! |
| Mrgprb1 233231       | -1 | #DIV/0! | 1 | #DIV/0! |
| Tmprss11g 320454     | -1 | #DIV/0! | 1 | #DIV/0! |
| Gm10697 100042761    | -1 | #DIV/0! | 1 | #DIV/0! |
| Klf5 12224           | -1 | #DIV/0! | 1 | #DIV/0! |
| Mir1930 100316811    | -1 | #DIV/0! | 1 | #DIV/0! |
| Cd300c 387565        | -1 | #DIV/0! | 1 | #DIV/0! |
| Kcnip4 80334         | -1 | #DIV/0! | 1 | #DIV/0! |
| Slitrk3 386750       | -1 | #DIV/0! | 1 | #DIV/0! |
| Rfp14 192658         | -1 | #DIV/0! | 1 | #DIV/0! |
| Mir322 723907        | -1 | #DIV/0! | 1 | #DIV/0! |
| Hecw1 94253          | -1 | #DIV/0! | 1 | #DIV/0! |
| Gpr149 229357        | -1 | #DIV/0! | 1 | #DIV/0! |
| Olfr1447 258698      | -1 | #DIV/0! | 1 | #DIV/0! |
| Xpnp2e 170745        | -1 | #DIV/0! | 1 | #DIV/0! |
| Gucy2e 14919         | -1 | #DIV/0! | 1 | #DIV/0! |
| Gm6812 627927        | -1 | #DIV/0! | 1 | #DIV/0! |
| Olfr1366 258280      | -1 | #DIV/0! | 1 | #DIV/0! |
| Zfp239 22685         | -1 | #DIV/0! | 1 | #DIV/0! |
| Olfr1282 258909      | -1 | #DIV/0! | 1 | #DIV/0! |
| Prlh 623503          | -1 | #DIV/0! | 1 | #DIV/0! |

|                      |    |         |   |         |
|----------------------|----|---------|---|---------|
| Hils1 54388          | -1 | #DIV/0! | 1 | #DIV/0! |
| Gm382 211208         | -1 | #DIV/0! | 1 | #DIV/0! |
| Olfr508 258769       | -1 | #DIV/0! | 1 | #DIV/0! |
| Pcdhga10 93722       | -1 | #DIV/0! | 1 | #DIV/0! |
| Npvf 60531           | -1 | #DIV/0! | 1 | #DIV/0! |
| Krt78 332131         | -1 | #DIV/0! | 1 | #DIV/0! |
| Sema3e 20349         | -1 | #DIV/0! | 1 | #DIV/0! |
| Gm106 226866         | -1 | #DIV/0! | 1 | #DIV/0! |
| Mir181a-2 387176     | -1 | #DIV/0! | 1 | #DIV/0! |
| Calm13 70405         | -1 | #DIV/0! | 1 | #DIV/0! |
| Otud6a 408193        | -1 | #DIV/0! | 1 | #DIV/0! |
| Tbata 65971          | -1 | #DIV/0! | 1 | #DIV/0! |
| Olfr713 259036       | -1 | #DIV/0! | 1 | #DIV/0! |
| Olfr115 257908       | -1 | #DIV/0! | 1 | #DIV/0! |
| Sgol2 68549          | -1 | #DIV/0! | 1 | #DIV/0! |
| Pramel6 347711       | -1 | #DIV/0! | 1 | #DIV/0! |
| Vmn1r232 171227      | -1 | #DIV/0! | 1 | #DIV/0! |
| Olfr570 259114       | -1 | #DIV/0! | 1 | #DIV/0! |
| Slitrk6 239250       | -1 | #DIV/0! | 1 | #DIV/0! |
| Olfr1501 258626      | -1 | #DIV/0! | 1 | #DIV/0! |
| 4922501L14Rik 209601 | -1 | #DIV/0! | 1 | #DIV/0! |
| Cadps 27062          | -1 | #DIV/0! | 1 | #DIV/0! |
| Olfr944 258500       | -1 | #DIV/0! | 1 | #DIV/0! |
| Olfr1220 258902      | -1 | #DIV/0! | 1 | #DIV/0! |
| Gm6164 620574        | -1 | #DIV/0! | 1 | #DIV/0! |
| C77370 245555        | -1 | #DIV/0! | 1 | #DIV/0! |
| Mir467a-3 100526484  | -1 | #DIV/0! | 1 | #DIV/0! |
| Olfr222 257962       | -1 | #DIV/0! | 1 | #DIV/0! |
| Zg16 69036           | -1 | #DIV/0! | 1 | #DIV/0! |
| Mrgprb3 404238       | -1 | #DIV/0! | 1 | #DIV/0! |
| Slc6a18 22598        | -1 | #DIV/0! | 1 | #DIV/0! |
| Slc5a10 109342       | -1 | #DIV/0! | 1 | #DIV/0! |
| Rbpjl 19668          | -1 | #DIV/0! | 1 | #DIV/0! |
| Klra8 16639          | -1 | #DIV/0! | 1 | #DIV/0! |
| Atp13a4 224079       | -1 | #DIV/0! | 1 | #DIV/0! |
| Gzmk 14945           | -1 | #DIV/0! | 1 | #DIV/0! |
| Alx3 11694           | -1 | #DIV/0! | 1 | #DIV/0! |
| Snord110 100217452   | -1 | #DIV/0! | 1 | #DIV/0! |
| Ptx4 68509           | -1 | #DIV/0! | 1 | #DIV/0! |
| Figl1 60530          | -1 | #DIV/0! | 1 | #DIV/0! |
| Gm7134 634340        | -1 | #DIV/0! | 1 | #DIV/0! |
| Krt25 70810          | -1 | #DIV/0! | 1 | #DIV/0! |
| Olfr1450 258368      | -1 | #DIV/0! | 1 | #DIV/0! |
| Olfr1076 258401      | -1 | #DIV/0! | 1 | #DIV/0! |
| Evx2 14029           | -1 | #DIV/0! | 1 | #DIV/0! |
| Khdrbs2 170771       | -1 | #DIV/0! | 1 | #DIV/0! |
| Gm13177 435815       | -1 | #DIV/0! | 1 | #DIV/0! |
| 1700080E11Rik 73532  | -1 | #DIV/0! | 1 | #DIV/0! |
| Lrfn2 70530          | -1 | #DIV/0! | 1 | #DIV/0! |
| Rxfp3 239336         | -1 | #DIV/0! | 1 | #DIV/0! |
| Plscr5 331000        | -1 | #DIV/0! | 1 | #DIV/0! |
| Kirrel2 243911       | -1 | #DIV/0! | 1 | #DIV/0! |
| Mdh1b 76668          | -1 | #DIV/0! | 1 | #DIV/0! |

|                     |    |         |   |         |
|---------------------|----|---------|---|---------|
| Ins1 16333          | -1 | #DIV/0! | 1 | #DIV/0! |
| Olfr1016 257915     | -1 | #DIV/0! | 1 | #DIV/0! |
| 1600015110Rik 69761 | -1 | #DIV/0! | 1 | #DIV/0! |
| Apol10a 245282      | -1 | #DIV/0! | 1 | #DIV/0! |
| 4933402E13Rik 74437 | -1 | #DIV/0! | 1 | #DIV/0! |
| Hist1h2bk 319184    | -1 | #DIV/0! | 1 | #DIV/0! |
| Mir674 732489       | -1 | #DIV/0! | 1 | #DIV/0! |
| 1700019N19Rik 67507 | -1 | #DIV/0! | 1 | #DIV/0! |
| Defb18 654460       | -1 | #DIV/0! | 1 | #DIV/0! |
| Olfr411 258704      | -1 | #DIV/0! | 1 | #DIV/0! |
| Olfr878 258794      | -1 | #DIV/0! | 1 | #DIV/0! |
| Olfr91 258470       | -1 | #DIV/0! | 1 | #DIV/0! |
| Gm11468 670775      | -1 | #DIV/0! | 1 | #DIV/0! |
| 4930474M22Rik 74917 | -1 | #DIV/0! | 1 | #DIV/0! |
| Klh133 546611       | -1 | #DIV/0! | 1 | #DIV/0! |
| 4930511M11Rik 75010 | -1 | #DIV/0! | 1 | #DIV/0! |
| Mir130a 387149      | -1 | #DIV/0! | 1 | #DIV/0! |
| lp6k3 271424        | -1 | #DIV/0! | 1 | #DIV/0! |
| Tcl1b4 27380        | -1 | #DIV/0! | 1 | #DIV/0! |
| Cst8 13012          | -1 | #DIV/0! | 1 | #DIV/0! |
| Zscan4a 434555      | -1 | #DIV/0! | 1 | #DIV/0! |
| Olfr243 436002      | -1 | #DIV/0! | 1 | #DIV/0! |
| Gm6607 625603       | -1 | #DIV/0! | 1 | #DIV/0! |
| 4930469G21Rik 74933 | -1 | #DIV/0! | 1 | #DIV/0! |
| Acbd7 78245         | -1 | #DIV/0! | 1 | #DIV/0! |
| 4930524E20Rik 75097 | -1 | #DIV/0! | 1 | #DIV/0! |
| Pmfbp1 56523        | -1 | #DIV/0! | 1 | #DIV/0! |
| Olfr30 18329        | -1 | #DIV/0! | 1 | #DIV/0! |
| Olfr1300-ps1 258199 | -1 | #DIV/0! | 1 | #DIV/0! |
| Pldi 73616          | -1 | #DIV/0! | 1 | #DIV/0! |
| Gm829 329839        | -1 | #DIV/0! | 1 | #DIV/0! |
| Olfr1029 258154     | -1 | #DIV/0! | 1 | #DIV/0! |
| Olfr1349 269862     | -1 | #DIV/0! | 1 | #DIV/0! |
| Il5 16191           | -1 | #DIV/0! | 1 | #DIV/0! |
| Slc6a5 104245       | -1 | #DIV/0! | 1 | #DIV/0! |
| Prm1 19118          | -1 | #DIV/0! | 1 | #DIV/0! |
| A1314831 329480     | -1 | #DIV/0! | 1 | #DIV/0! |
| Stoml3 229277       | -1 | #DIV/0! | 1 | #DIV/0! |
| Olfr875 258744      | -1 | #DIV/0! | 1 | #DIV/0! |
| Fam170b 105511      | -1 | #DIV/0! | 1 | #DIV/0! |
| Olfr996 258429      | -1 | #DIV/0! | 1 | #DIV/0! |
| Bai1 107831         | -1 | #DIV/0! | 1 | #DIV/0! |
| Sbk2 381836         | -1 | #DIV/0! | 1 | #DIV/0! |
| Gm815 329047        | -1 | #DIV/0! | 1 | #DIV/0! |
| Fam179a 320159      | -1 | #DIV/0! | 1 | #DIV/0! |
| Olfr514 258721      | -1 | #DIV/0! | 1 | #DIV/0! |
| Stmn4 56471         | -1 | #DIV/0! | 1 | #DIV/0! |
| Gm10665 100043058   | -1 | #DIV/0! | 1 | #DIV/0! |
| Gabrb1 14400        | -1 | #DIV/0! | 1 | #DIV/0! |
| Ofcc1 218165        | -1 | #DIV/0! | 1 | #DIV/0! |
| Prss2 22072         | -1 | #DIV/0! | 1 | #DIV/0! |
| Syt8 55925          | -1 | #DIV/0! | 1 | #DIV/0! |
| Olfr450 258437      | -1 | #DIV/0! | 1 | #DIV/0! |

|                      |    |         |   |         |
|----------------------|----|---------|---|---------|
| Nrn1 234700          | -1 | #DIV/0! | 1 | #DIV/0! |
| 4931407G18Rik 70977  | -1 | #DIV/0! | 1 | #DIV/0! |
| Olf723 259147        | -1 | #DIV/0! | 1 | #DIV/0! |
| Abcc12 244562        | -1 | #DIV/0! | 1 | #DIV/0! |
| Gipr 381853          | -1 | #DIV/0! | 1 | #DIV/0! |
| Wfdc6b 433502        | -1 | #DIV/0! | 1 | #DIV/0! |
| Olf1417 258938       | -1 | #DIV/0! | 1 | #DIV/0! |
| Rrh 20132            | -1 | #DIV/0! | 1 | #DIV/0! |
| 9130204L05Rik 229550 | -1 | #DIV/0! | 1 | #DIV/0! |
| Aadacl2 639634       | -1 | #DIV/0! | 1 | #DIV/0! |
| Pfn3 75477           | -1 | #DIV/0! | 1 | #DIV/0! |
| Dcpp2 630537         | -1 | #DIV/0! | 1 | #DIV/0! |
| Vmn2r47 100042891    | -1 | #DIV/0! | 1 | #DIV/0! |
| Olf780 258281        | -1 | #DIV/0! | 1 | #DIV/0! |
| 6030498E09Rik 77883  | -1 | #DIV/0! | 1 | #DIV/0! |
| Ccdc121 403180       | -1 | #DIV/0! | 1 | #DIV/0! |
| Kcnh7 170738         | -1 | #DIV/0! | 1 | #DIV/0! |
| Olf1055 259023       | -1 | #DIV/0! | 1 | #DIV/0! |
| Mir3099 100499513    | -1 | #DIV/0! | 1 | #DIV/0! |
| Catsperb 271036      | -1 | #DIV/0! | 1 | #DIV/0! |
| Magel2 27385         | -1 | #DIV/0! | 1 | #DIV/0! |
| Vmn2r109 627814      | -1 | #DIV/0! | 1 | #DIV/0! |
| Tcl1 21432           | -1 | #DIV/0! | 1 | #DIV/0! |
| Mir376c 723856       | -1 | #DIV/0! | 1 | #DIV/0! |
| Fgf4 14175           | -1 | #DIV/0! | 1 | #DIV/0! |
| Mir1944 100316696    | -1 | #DIV/0! | 1 | #DIV/0! |
| Olf743 219019        | -1 | #DIV/0! | 1 | #DIV/0! |
| Emx2 13797           | -1 | #DIV/0! | 1 | #DIV/0! |
| Ssxb2 387132         | -1 | #DIV/0! | 1 | #DIV/0! |
| Muc5ac 17833         | -1 | #DIV/0! | 1 | #DIV/0! |
| Efhc1 71877          | -1 | #DIV/0! | 1 | #DIV/0! |
| Olf170 258959        | -1 | #DIV/0! | 1 | #DIV/0! |
| Mir1971 100316715    | -1 | #DIV/0! | 1 | #DIV/0! |
| Lce3a 545548         | -1 | #DIV/0! | 1 | #DIV/0! |
| Olf76 258677         | -1 | #DIV/0! | 1 | #DIV/0! |
| Phlda2 22113         | -1 | #DIV/0! | 1 | #DIV/0! |
| Shisa6 380702        | -1 | #DIV/0! | 1 | #DIV/0! |
| Phgr1 53906          | -1 | #DIV/0! | 1 | #DIV/0! |
| Hoxa7 15404          | -1 | #DIV/0! | 1 | #DIV/0! |
| Antxrl 239029        | -1 | #DIV/0! | 1 | #DIV/0! |
| BC051628 332713      | -1 | #DIV/0! | 1 | #DIV/0! |
| Adam26a 13525        | -1 | #DIV/0! | 1 | #DIV/0! |
| Olf769 257667        | -1 | #DIV/0! | 1 | #DIV/0! |
| Mir299 723927        | -1 | #DIV/0! | 1 | #DIV/0! |
| Vmn1r82 171268       | -1 | #DIV/0! | 1 | #DIV/0! |
| Emilin3 280635       | -1 | #DIV/0! | 1 | #DIV/0! |
| Nepn 66650           | -1 | #DIV/0! | 1 | #DIV/0! |
| Olf776 404321        | -1 | #DIV/0! | 1 | #DIV/0! |
| Tgif2lx2 100039551   | -1 | #DIV/0! | 1 | #DIV/0! |
| Hoxd13 15433         | -1 | #DIV/0! | 1 | #DIV/0! |
| Spatc1 74281         | -1 | #DIV/0! | 1 | #DIV/0! |
| B3gnt4 231727        | -1 | #DIV/0! | 1 | #DIV/0! |
| Mir429 723865        | -1 | #DIV/0! | 1 | #DIV/0! |

|                     |    |         |   |         |
|---------------------|----|---------|---|---------|
| Olf1115 258294      | -1 | #DIV/0! | 1 | #DIV/0! |
| Vsnl1 26950         | -1 | #DIV/0! | 1 | #DIV/0! |
| Olf1228 258973      | -1 | #DIV/0! | 1 | #DIV/0! |
| Olf1504 258627      | -1 | #DIV/0! | 1 | #DIV/0! |
| Ninj2 29862         | -1 | #DIV/0! | 1 | #DIV/0! |
| Rgs18 64214         | -1 | #DIV/0! | 1 | #DIV/0! |
| Gm8677 667512       | -1 | #DIV/0! | 1 | #DIV/0! |
| Mir344d-1 100526544 | -1 | #DIV/0! | 1 | #DIV/0! |
| Gnat3 242851        | -1 | #DIV/0! | 1 | #DIV/0! |
| Olf1575 259118      | -1 | #DIV/0! | 1 | #DIV/0! |
| Ptprn2 19276        | -1 | #DIV/0! | 1 | #DIV/0! |
| Pr17a1 19113        | -1 | #DIV/0! | 1 | #DIV/0! |
| Vmn2r18 632671      | -1 | #DIV/0! | 1 | #DIV/0! |
| Sv2a 64051          | -1 | #DIV/0! | 1 | #DIV/0! |
| Hoxa10 15395        | -1 | #DIV/0! | 1 | #DIV/0! |
| Olf1193 329460      | -1 | #DIV/0! | 1 | #DIV/0! |
| Nanos2 378430       | -1 | #DIV/0! | 1 | #DIV/0! |
| 4930402F06Rik 74854 | -1 | #DIV/0! | 1 | #DIV/0! |
| Ryr2 20191          | -1 | #DIV/0! | 1 | #DIV/0! |
| Olf287 634104       | -1 | #DIV/0! | 1 | #DIV/0! |
| Arhgap40 545481     | -1 | #DIV/0! | 1 | #DIV/0! |
| P2ry10 78826        | -1 | #DIV/0! | 1 | #DIV/0! |
| Snord72 100302529   | -1 | #DIV/0! | 1 | #DIV/0! |
| Ear5 54159          | -1 | #DIV/0! | 1 | #DIV/0! |
| Olf341 258952       | -1 | #DIV/0! | 1 | #DIV/0! |
| Vmn2r56 629079      | -1 | #DIV/0! | 1 | #DIV/0! |
| Mir16-1 387134      | -1 | #DIV/0! | 1 | #DIV/0! |
| H2-M1 224756        | -1 | #DIV/0! | 1 | #DIV/0! |
| Vmn1r151 435947     | -1 | #DIV/0! | 1 | #DIV/0! |
| Snord92 100217462   | -1 | #DIV/0! | 1 | #DIV/0! |
| Kcnc1 16502         | -1 | #DIV/0! | 1 | #DIV/0! |
| lqca 74918          | -1 | #DIV/0! | 1 | #DIV/0! |
| Olf919 258432       | -1 | #DIV/0! | 1 | #DIV/0! |
| Ceacam5 73250       | -1 | #DIV/0! | 1 | #DIV/0! |
| Olf972 258603       | -1 | #DIV/0! | 1 | #DIV/0! |
| Psemb11 73902       | -1 | #DIV/0! | 1 | #DIV/0! |
| Cxcl15 20309        | -1 | #DIV/0! | 1 | #DIV/0! |
| Olf530 258512       | -1 | #DIV/0! | 1 | #DIV/0! |
| Krtap16-8 68484     | -1 | #DIV/0! | 1 | #DIV/0! |
| Olf1269 258339      | -1 | #DIV/0! | 1 | #DIV/0! |
| Gm4736 114600       | -1 | #DIV/0! | 1 | #DIV/0! |
| Olf15 18312         | -1 | #DIV/0! | 1 | #DIV/0! |
| Mir221 723827       | -1 | #DIV/0! | 1 | #DIV/0! |
| Dppa5a 434423       | -1 | #DIV/0! | 1 | #DIV/0! |
| Dmkn 73712          | -1 | #DIV/0! | 1 | #DIV/0! |
| Gm11554 670482      | -1 | #DIV/0! | 1 | #DIV/0! |
| Dfnb59 381375       | -1 | #DIV/0! | 1 | #DIV/0! |
| Gm11426 791422      | -1 | #DIV/0! | 1 | #DIV/0! |
| Theg 21830          | -1 | #DIV/0! | 1 | #DIV/0! |
| Gm590 235634        | -1 | #DIV/0! | 1 | #DIV/0! |
| Krt32 16670         | -1 | #DIV/0! | 1 | #DIV/0! |
| Gm10823 100038623   | -1 | #DIV/0! | 1 | #DIV/0! |
| Olf683 259047       | -1 | #DIV/0! | 1 | #DIV/0! |



|                      |    |         |   |         |
|----------------------|----|---------|---|---------|
| Mcpt8 17231          | -1 | #DIV/0! | 1 | #DIV/0! |
| Zar1 545824          | -1 | #DIV/0! | 1 | #DIV/0! |
| Shc3 20418           | -1 | #DIV/0! | 1 | #DIV/0! |
| Olf676 259099        | -1 | #DIV/0! | 1 | #DIV/0! |
| Sgca 20391           | -1 | #DIV/0! | 1 | #DIV/0! |
| Neurog3 11925        | -1 | #DIV/0! | 1 | #DIV/0! |
| Vmn1r143 667469      | -1 | #DIV/0! | 1 | #DIV/0! |
| Ccl12 20293          | -1 | #DIV/0! | 1 | #DIV/0! |
| Olf54 18354          | -1 | #DIV/0! | 1 | #DIV/0! |
| 3632451O06Rik 67419  | -1 | #DIV/0! | 1 | #DIV/0! |
| Enox1 239188         | -1 | #DIV/0! | 1 | #DIV/0! |
| Zdbf2 73884          | -1 | #DIV/0! | 1 | #DIV/0! |
| Mir3474 100499529    | -1 | #DIV/0! | 1 | #DIV/0! |
| Chrna7 11441         | -1 | #DIV/0! | 1 | #DIV/0! |
| Tnp2 21959           | -1 | #DIV/0! | 1 | #DIV/0! |
| Mir574 100124451     | -1 | #DIV/0! | 1 | #DIV/0! |
| Tas2r137 574417      | -1 | #DIV/0! | 1 | #DIV/0! |
| Gm9705 677156        | -1 | #DIV/0! | 1 | #DIV/0! |
| Mir297-1 723831      | -1 | #DIV/0! | 1 | #DIV/0! |
| Prss54 70993         | -1 | #DIV/0! | 1 | #DIV/0! |
| Olf523 258511        | -1 | #DIV/0! | 1 | #DIV/0! |
| Tex16 83556          | -1 | #DIV/0! | 1 | #DIV/0! |
| Mir140 387158        | -1 | #DIV/0! | 1 | #DIV/0! |
| Defb45 433490        | -1 | #DIV/0! | 1 | #DIV/0! |
| Scarna3a 100217414   | -1 | #DIV/0! | 1 | #DIV/0! |
| Dub2a 384701         | -1 | #DIV/0! | 1 | #DIV/0! |
| Olf873 258554        | -1 | #DIV/0! | 1 | #DIV/0! |
| Rprm 67874           | -1 | #DIV/0! | 1 | #DIV/0! |
| Olf316 258064        | -1 | #DIV/0! | 1 | #DIV/0! |
| Snx31 66696          | -1 | #DIV/0! | 1 | #DIV/0! |
| Krtap3-1 69473       | -1 | #DIV/0! | 1 | #DIV/0! |
| Dcpp3 620253         | -1 | #DIV/0! | 1 | #DIV/0! |
| BC016579 212998      | -1 | #DIV/0! | 1 | #DIV/0! |
| Ttc39d 67737         | -1 | #DIV/0! | 1 | #DIV/0! |
| Fam40b 320609        | -1 | #DIV/0! | 1 | #DIV/0! |
| Olf430 258713        | -1 | #DIV/0! | 1 | #DIV/0! |
| Mir146b 751550       | -1 | #DIV/0! | 1 | #DIV/0! |
| Irg1 16365           | -1 | #DIV/0! | 1 | #DIV/0! |
| Mir148a 387166       | -1 | #DIV/0! | 1 | #DIV/0! |
| Lass3 545975         | -1 | #DIV/0! | 1 | #DIV/0! |
| Olf140 57272         | -1 | #DIV/0! | 1 | #DIV/0! |
| 4930557A04Rik 385317 | -1 | #DIV/0! | 1 | #DIV/0! |
| Mir30c-1 387227      | -1 | #DIV/0! | 1 | #DIV/0! |
| Gm15293 100041759    | -1 | #DIV/0! | 1 | #DIV/0! |
| Sox15 20670          | -1 | #DIV/0! | 1 | #DIV/0! |
| Diras1 208666        | -1 | #DIV/0! | 1 | #DIV/0! |
| Pgf 18654            | -1 | #DIV/0! | 1 | #DIV/0! |
| Ccr6 12458           | -1 | #DIV/0! | 1 | #DIV/0! |
| Guca2b 14916         | -1 | #DIV/0! | 1 | #DIV/0! |
| Shox2 20429          | -1 | #DIV/0! | 1 | #DIV/0! |
| Vmn1r2 100312470     | -1 | #DIV/0! | 1 | #DIV/0! |
| Olf151 406176        | -1 | #DIV/0! | 1 | #DIV/0! |
| 1700022P22Rik 75558  | -1 | #DIV/0! | 1 | #DIV/0! |

|                     |    |         |   |         |
|---------------------|----|---------|---|---------|
| Vmn2r40 100042781   | -1 | #DIV/0! | 1 | #DIV/0! |
| Gsc 14836           | -1 | #DIV/0! | 1 | #DIV/0! |
| BC030870 407795     | -1 | #DIV/0! | 1 | #DIV/0! |
| C1ql2 226359        | -1 | #DIV/0! | 1 | #DIV/0! |
| Mir101b 724062      | -1 | #DIV/0! | 1 | #DIV/0! |
| Sry 21674           | -1 | #DIV/0! | 1 | #DIV/0! |
| Mtap7d3 320923      | -1 | #DIV/0! | 1 | #DIV/0! |
| 2810405F15Rik 69974 | -1 | #DIV/0! | 1 | #DIV/0! |
| Ecel1 13599         | -1 | #DIV/0! | 1 | #DIV/0! |
| Chst5 56773         | -1 | #DIV/0! | 1 | #DIV/0! |
| Mir152 387170       | -1 | #DIV/0! | 1 | #DIV/0! |
| Gm10229 100040201   | -1 | #DIV/0! | 1 | #DIV/0! |
| Myo15 17910         | -1 | #DIV/0! | 1 | #DIV/0! |
| Lrrc7 242274        | -1 | #DIV/0! | 1 | #DIV/0! |
| Psg19 26439         | -1 | #DIV/0! | 1 | #DIV/0! |
| Vmn1r119 384696     | -1 | #DIV/0! | 1 | #DIV/0! |
| Ch25h 12642         | -1 | #DIV/0! | 1 | #DIV/0! |
| Npsr1 319239        | -1 | #DIV/0! | 1 | #DIV/0! |
| Clcnkb 56365        | -1 | #DIV/0! | 1 | #DIV/0! |
| Mrgpra4 235854      | -1 | #DIV/0! | 1 | #DIV/0! |
| Clec4a4 474145      | -1 | #DIV/0! | 1 | #DIV/0! |
| Scn2b 72821         | -1 | #DIV/0! | 1 | #DIV/0! |
| Olfr974 259111      | -1 | #DIV/0! | 1 | #DIV/0! |
| Mir26a-2 723962     | -1 | #DIV/0! | 1 | #DIV/0! |
| Foxi2 270004        | -1 | #DIV/0! | 1 | #DIV/0! |
| Psg20 434540        | -1 | #DIV/0! | 1 | #DIV/0! |
| Mir465c-2 100124464 | -1 | #DIV/0! | 1 | #DIV/0! |
| 1700066O22Rik 74916 | -1 | #DIV/0! | 1 | #DIV/0! |
| AW551984 244810     | -1 | #DIV/0! | 1 | #DIV/0! |
| Mir302c 723835      | -1 | #DIV/0! | 1 | #DIV/0! |
| Spink14 433178      | -1 | #DIV/0! | 1 | #DIV/0! |
| Lrrc9 78257         | -1 | #DIV/0! | 1 | #DIV/0! |
| Bet3l 692132        | -1 | #DIV/0! | 1 | #DIV/0! |
| Hist1h2bq 665596    | -1 | #DIV/0! | 1 | #DIV/0! |
| a 50518             | -1 | #DIV/0! | 1 | #DIV/0! |
| Prg2 19074          | -1 | #DIV/0! | 1 | #DIV/0! |
| Sv2b 64176          | -1 | #DIV/0! | 1 | #DIV/0! |
| Olfr509 258369      | -1 | #DIV/0! | 1 | #DIV/0! |
| Gtsf1l 68236        | -1 | #DIV/0! | 1 | #DIV/0! |
| Olfr1453 258695     | -1 | #DIV/0! | 1 | #DIV/0! |
| Psg27 545925        | -1 | #DIV/0! | 1 | #DIV/0! |
| Olfr959 258501      | -1 | #DIV/0! | 1 | #DIV/0! |
| Olfr1463 258120     | -1 | #DIV/0! | 1 | #DIV/0! |
| Olfr772 257666      | -1 | #DIV/0! | 1 | #DIV/0! |
| Abph 57426          | -1 | #DIV/0! | 1 | #DIV/0! |
| Gm757 329360        | -1 | #DIV/0! | 1 | #DIV/0! |
| Krtap31-1 70831     | -1 | #DIV/0! | 1 | #DIV/0! |
| Mrgpra2a 668727     | -1 | #DIV/0! | 1 | #DIV/0! |
| Dlx6as1 320038      | -1 | #DIV/0! | 1 | #DIV/0! |
| Uncx 22255          | -1 | #DIV/0! | 1 | #DIV/0! |
| Htr1d 15552         | -1 | #DIV/0! | 1 | #DIV/0! |
| Mrgpra3 233222      | -1 | #DIV/0! | 1 | #DIV/0! |
| Crhbp 12919         | -1 | #DIV/0! | 1 | #DIV/0! |

|                      |    |         |   |         |
|----------------------|----|---------|---|---------|
| 4930505A04Rik 75087  | -1 | #DIV/0! | 1 | #DIV/0! |
| Olfr1145 258317      | -1 | #DIV/0! | 1 | #DIV/0! |
| Ctxn3 629147         | -1 | #DIV/0! | 1 | #DIV/0! |
| Olfr1262 258976      | -1 | #DIV/0! | 1 | #DIV/0! |
| Khdc1c 433278        | -1 | #DIV/0! | 1 | #DIV/0! |
| Cypt3 69361          | -1 | #DIV/0! | 1 | #DIV/0! |
| Pip5k1b 18719        | -1 | #DIV/0! | 1 | #DIV/0! |
| Hoxc11 109663        | -1 | #DIV/0! | 1 | #DIV/0! |
| Olfr1107 258841      | -1 | #DIV/0! | 1 | #DIV/0! |
| Adam21 56622         | -1 | #DIV/0! | 1 | #DIV/0! |
| Vmn2r82 624845       | -1 | #DIV/0! | 1 | #DIV/0! |
| Prp2 83380           | -1 | #DIV/0! | 1 | #DIV/0! |
| Ccl20 20297          | -1 | #DIV/0! | 1 | #DIV/0! |
| Gm12695 620779       | -1 | #DIV/0! | 1 | #DIV/0! |
| Actrt1 73360         | -1 | #DIV/0! | 1 | #DIV/0! |
| Ly6g5c 114652        | -1 | #DIV/0! | 1 | #DIV/0! |
| Mir451 723870        | -1 | #DIV/0! | 1 | #DIV/0! |
| Mir665 751555        | -1 | #DIV/0! | 1 | #DIV/0! |
| Mir1955 100316756    | -1 | #DIV/0! | 1 | #DIV/0! |
| Ankar 319695         | -1 | #DIV/0! | 1 | #DIV/0! |
| Lgi2 246316          | -1 | #DIV/0! | 1 | #DIV/0! |
| Mir96 723886         | -1 | #DIV/0! | 1 | #DIV/0! |
| Ribc2 67747          | -1 | #DIV/0! | 1 | #DIV/0! |
| Vmn1r202 171258      | -1 | #DIV/0! | 1 | #DIV/0! |
| Olfr225 257886       | -1 | #DIV/0! | 1 | #DIV/0! |
| Clec2g 70809         | -1 | #DIV/0! | 1 | #DIV/0! |
| Gm13277 545650       | -1 | #DIV/0! | 1 | #DIV/0! |
| Tbpl2 227606         | -1 | #DIV/0! | 1 | #DIV/0! |
| U90926 57425         | -1 | #DIV/0! | 1 | #DIV/0! |
| Ajap1 230959         | -1 | #DIV/0! | 1 | #DIV/0! |
| Cnga2 12789          | -1 | #DIV/0! | 1 | #DIV/0! |
| Sox3 20675           | -1 | #DIV/0! | 1 | #DIV/0! |
| Olfr1329 258214      | -1 | #DIV/0! | 1 | #DIV/0! |
| Mcoln3 171166        | -1 | #DIV/0! | 1 | #DIV/0! |
| Prl2a1 56635         | -1 | #DIV/0! | 1 | #DIV/0! |
| Cntn5 244682         | -1 | #DIV/0! | 1 | #DIV/0! |
| Krt77 406220         | -1 | #DIV/0! | 1 | #DIV/0! |
| Vmn1r167 622032      | -1 | #DIV/0! | 1 | #DIV/0! |
| Olfr1388 258459      | -1 | #DIV/0! | 1 | #DIV/0! |
| Aqp12 208760         | -1 | #DIV/0! | 1 | #DIV/0! |
| Il28a 330496         | -1 | #DIV/0! | 1 | #DIV/0! |
| Olfr1508 57270       | -1 | #DIV/0! | 1 | #DIV/0! |
| 7420426K07Rik 546157 | -1 | #DIV/0! | 1 | #DIV/0! |
| Olfr198 258036       | -1 | #DIV/0! | 1 | #DIV/0! |
| Pnpla5 75772         | -1 | #DIV/0! | 1 | #DIV/0! |
| Krt14 16664          | -1 | #DIV/0! | 1 | #DIV/0! |
| BC048943 217874      | -1 | #DIV/0! | 1 | #DIV/0! |
| Eif2s3y 26908        | -1 | #DIV/0! | 1 | #DIV/0! |
| Rfx6 320995          | -1 | #DIV/0! | 1 | #DIV/0! |
| Mirlet7e 387248      | -1 | #DIV/0! | 1 | #DIV/0! |
| 4933411G11Rik 330228 | -1 | #DIV/0! | 1 | #DIV/0! |
| 2410004P03Rik 73667  | -1 | #DIV/0! | 1 | #DIV/0! |
| Tram1l1 229801       | -1 | #DIV/0! | 1 | #DIV/0! |

|                      |    |         |   |         |
|----------------------|----|---------|---|---------|
| Ndc80 67052          | -1 | #DIV/0! | 1 | #DIV/0! |
| Gm15315 100041952    | -1 | #DIV/0! | 1 | #DIV/0! |
| Mir323 723839        | -1 | #DIV/0! | 1 | #DIV/0! |
| Mrgprb8 404240       | -1 | #DIV/0! | 1 | #DIV/0! |
| Hist2h4 97122        | -1 | #DIV/0! | 1 | #DIV/0! |
| Gm14511 434727       | -1 | #DIV/0! | 1 | #DIV/0! |
| Rhox4c 434759        | -1 | #DIV/0! | 1 | #DIV/0! |
| Olfr1494 258992      | -1 | #DIV/0! | 1 | #DIV/0! |
| Tas2r140 387616      | -1 | #DIV/0! | 1 | #DIV/0! |
| Klra23 79410         | -1 | #DIV/0! | 1 | #DIV/0! |
| Krt84 16680          | -1 | #DIV/0! | 1 | #DIV/0! |
| Tas2r104 387340      | -1 | #DIV/0! | 1 | #DIV/0! |
| Olfr541 258964       | -1 | #DIV/0! | 1 | #DIV/0! |
| Ros1 19886           | -1 | #DIV/0! | 1 | #DIV/0! |
| Pdcl2 79455          | -1 | #DIV/0! | 1 | #DIV/0! |
| Ifna1 15962          | -1 | #DIV/0! | 1 | #DIV/0! |
| Spo11 26972          | -1 | #DIV/0! | 1 | #DIV/0! |
| Olfr351 258944       | -1 | #DIV/0! | 1 | #DIV/0! |
| Rhox3h 434758        | -1 | #DIV/0! | 1 | #DIV/0! |
| Fam83b 208994        | -1 | #DIV/0! | 1 | #DIV/0! |
| Tas2r116 112408      | -1 | #DIV/0! | 1 | #DIV/0! |
| Olfr324 257892       | -1 | #DIV/0! | 1 | #DIV/0! |
| 1700012P22Rik 69364  | -1 | #DIV/0! | 1 | #DIV/0! |
| Krt40 406221         | -1 | #DIV/0! | 1 | #DIV/0! |
| Fam83e 73813         | -1 | #DIV/0! | 1 | #DIV/0! |
| Fam178b 381337       | -1 | #DIV/0! | 1 | #DIV/0! |
| Rnf112 22671         | -1 | #DIV/0! | 1 | #DIV/0! |
| Otof 83762           | -1 | #DIV/0! | 1 | #DIV/0! |
| Xlra4 434794         | -1 | #DIV/0! | 1 | #DIV/0! |
| 5330437I02Rik 319888 | -1 | #DIV/0! | 1 | #DIV/0! |
| Pet2 18630           | -1 | #DIV/0! | 1 | #DIV/0! |
| Vmn2r17 384221       | -1 | #DIV/0! | 1 | #DIV/0! |
| Rbp7 63954           | -1 | #DIV/0! | 1 | #DIV/0! |
| Ffar3 233080         | -1 | #DIV/0! | 1 | #DIV/0! |
| Bpi 329547           | -1 | #DIV/0! | 1 | #DIV/0! |
| Olfr432 258711       | -1 | #DIV/0! | 1 | #DIV/0! |
| Olfr524 258055       | -1 | #DIV/0! | 1 | #DIV/0! |
| Nhedc2 97086         | -1 | #DIV/0! | 1 | #DIV/0! |
| Vmn2r23 435916       | -1 | #DIV/0! | 1 | #DIV/0! |
| Mir491 735282        | -1 | #DIV/0! | 1 | #DIV/0! |
| Olfr1090 258844      | -1 | #DIV/0! | 1 | #DIV/0! |
| Gm15093 100039890    | -1 | #DIV/0! | 1 | #DIV/0! |
| Olfr742 258422       | -1 | #DIV/0! | 1 | #DIV/0! |
| Ifna2 15965          | -1 | #DIV/0! | 1 | #DIV/0! |
| Pcdha3 192163        | -1 | #DIV/0! | 1 | #DIV/0! |
| C130079G13Rik 229333 | -1 | #DIV/0! | 1 | #DIV/0! |
| Olfr446 258292       | -1 | #DIV/0! | 1 | #DIV/0! |
| Epha5 13839          | -1 | #DIV/0! | 1 | #DIV/0! |
| Edil3 13612          | -1 | #DIV/0! | 1 | #DIV/0! |
| Pcdhgc4 93707        | -1 | #DIV/0! | 1 | #DIV/0! |
| Snord104 100216537   | -1 | #DIV/0! | 1 | #DIV/0! |
| Gm4340 100043292     | -1 | #DIV/0! | 1 | #DIV/0! |
| Mir3070a 100526472   | -1 | #DIV/0! | 1 | #DIV/0! |

|                      |    |         |   |         |
|----------------------|----|---------|---|---------|
| Hesx1 15209          | -1 | #DIV/0! | 1 | #DIV/0! |
| Tmem211 333048       | -1 | #DIV/0! | 1 | #DIV/0! |
| Ankrd33 208258       | -1 | #DIV/0! | 1 | #DIV/0! |
| Lonrf2 381338        | -1 | #DIV/0! | 1 | #DIV/0! |
| Depdc1a 76131        | -1 | #DIV/0! | 1 | #DIV/0! |
| Vmn1r84 171267       | -1 | #DIV/0! | 1 | #DIV/0! |
| Ceacam13 69785       | -1 | #DIV/0! | 1 | #DIV/0! |
| Mettl7a3 668178      | -1 | #DIV/0! | 1 | #DIV/0! |
| 4930502E18Rik 75013  | -1 | #DIV/0! | 1 | #DIV/0! |
| Vmn1r30 171195       | -1 | #DIV/0! | 1 | #DIV/0! |
| Vmn1r62 81016        | -1 | #DIV/0! | 1 | #DIV/0! |
| Mir339 723898        | -1 | #DIV/0! | 1 | #DIV/0! |
| Mir409 723862        | -1 | #DIV/0! | 1 | #DIV/0! |
| Krt35 53617          | -1 | #DIV/0! | 1 | #DIV/0! |
| Lmo3 109593          | -1 | #DIV/0! | 1 | #DIV/0! |
| Olfr433 258712       | -1 | #DIV/0! | 1 | #DIV/0! |
| Cst13 69294          | -1 | #DIV/0! | 1 | #DIV/0! |
| Prss51 74215         | -1 | #DIV/0! | 1 | #DIV/0! |
| Abpz 233090          | -1 | #DIV/0! | 1 | #DIV/0! |
| Vmn1r38 171186       | -1 | #DIV/0! | 1 | #DIV/0! |
| Nuf2 66977           | -1 | #DIV/0! | 1 | #DIV/0! |
| Vmn1r50 113852       | -1 | #DIV/0! | 1 | #DIV/0! |
| Izumo3 69314         | -1 | #DIV/0! | 1 | #DIV/0! |
| A830018L16Rik 320492 | -1 | #DIV/0! | 1 | #DIV/0! |
| Ctsm 64139           | -1 | #DIV/0! | 1 | #DIV/0! |
| Rpp25 102614         | -1 | #DIV/0! | 1 | #DIV/0! |
| Vmn2r39 545909       | -1 | #DIV/0! | 1 | #DIV/0! |
| Mir3057 100526465    | -1 | #DIV/0! | 1 | #DIV/0! |
| Gm1337 383787        | -1 | #DIV/0! | 1 | #DIV/0! |
| Olfr1509 57271       | -1 | #DIV/0! | 1 | #DIV/0! |
| Slc35f1 215085       | -1 | #DIV/0! | 1 | #DIV/0! |
| Olfr221 258420       | -1 | #DIV/0! | 1 | #DIV/0! |
| Gm3086 100040999     | -1 | #DIV/0! | 1 | #DIV/0! |
| B3galt2 26878        | -1 | #DIV/0! | 1 | #DIV/0! |
| 2310050B05Rik 69678  | -1 | #DIV/0! | 1 | #DIV/0! |
| Mir680-3 751520      | -1 | #DIV/0! | 1 | #DIV/0! |
| Spr2f 20760          | -1 | #DIV/0! | 1 | #DIV/0! |
| Olfr819 100043200    | -1 | #DIV/0! | 1 | #DIV/0! |
| Tbx5 21388           | -1 | #DIV/0! | 1 | #DIV/0! |
| Olfr561 259096       | -1 | #DIV/0! | 1 | #DIV/0! |
| Gm1995 100038982     | -1 | #DIV/0! | 1 | #DIV/0! |
| Gpr31c 436440        | -1 | #DIV/0! | 1 | #DIV/0! |
| Mir384 723861        | -1 | #DIV/0! | 1 | #DIV/0! |
| Gm14501 547154       | -1 | #DIV/0! | 1 | #DIV/0! |
| Mtap6 17760          | -1 | #DIV/0! | 1 | #DIV/0! |
| Mir3070b 100526519   | -1 | #DIV/0! | 1 | #DIV/0! |
| Xkr7 228787          | -1 | #DIV/0! | 1 | #DIV/0! |
| Olfr484 258492       | -1 | #DIV/0! | 1 | #DIV/0! |
| Gm9696 676914        | -1 | #DIV/0! | 1 | #DIV/0! |
| Meox2 17286          | -1 | #DIV/0! | 1 | #DIV/0! |
| Cnr1 12801           | -1 | #DIV/0! | 1 | #DIV/0! |
| Wdr64 75820          | -1 | #DIV/0! | 1 | #DIV/0! |
| Mir466 723922        | -1 | #DIV/0! | 1 | #DIV/0! |

|                      |    |         |   |         |
|----------------------|----|---------|---|---------|
| Gm9376 668814        | -1 | #DIV/0! | 1 | #DIV/0! |
| 3110047P20Rik 319807 | -1 | #DIV/0! | 1 | #DIV/0! |
| Gpr128 239853        | -1 | #DIV/0! | 1 | #DIV/0! |
| 4921533I20Rik 664619 | -1 | #DIV/0! | 1 | #DIV/0! |
| Vmn1r71 252910       | -1 | #DIV/0! | 1 | #DIV/0! |
| Kif2b 73470          | -1 | #DIV/0! | 1 | #DIV/0! |
| Hydin 244653         | -1 | #DIV/0! | 1 | #DIV/0! |
| Scn11a 24046         | -1 | #DIV/0! | 1 | #DIV/0! |
| Gm8787 667736        | -1 | #DIV/0! | 1 | #DIV/0! |
| Mir455 735262        | -1 | #DIV/0! | 1 | #DIV/0! |
| Dydc2 71200          | -1 | #DIV/0! | 1 | #DIV/0! |
| AF357359 100303647   | -1 | #DIV/0! | 1 | #DIV/0! |
| Gm14458 100042782    | -1 | #DIV/0! | 1 | #DIV/0! |
| Olf1260 258983       | -1 | #DIV/0! | 1 | #DIV/0! |
| Olf297 258611        | -1 | #DIV/0! | 1 | #DIV/0! |
| Olf1475 258298       | -1 | #DIV/0! | 1 | #DIV/0! |
| 3830431G21Rik 217682 | -1 | #DIV/0! | 1 | #DIV/0! |
| Prrx2 20204          | -1 | #DIV/0! | 1 | #DIV/0! |
| Wdr69 71227          | -1 | #DIV/0! | 1 | #DIV/0! |
| Olf830 258559        | -1 | #DIV/0! | 1 | #DIV/0! |
| Art1 11870           | -1 | #DIV/0! | 1 | #DIV/0! |
| Sprr2j-ps 20764      | -1 | #DIV/0! | 1 | #DIV/0! |
| 1700018L24Rik 75528  | -1 | #DIV/0! | 1 | #DIV/0! |
| Olf1361 258534       | -1 | #DIV/0! | 1 | #DIV/0! |
| Olf55 100038859      | -1 | #DIV/0! | 1 | #DIV/0! |
| Gm1322 383709        | -1 | #DIV/0! | 1 | #DIV/0! |
| Gm4566 100043644     | -1 | #DIV/0! | 1 | #DIV/0! |
| Actb12 238880        | -1 | #DIV/0! | 1 | #DIV/0! |
| Gm20554 328287       | -1 | #DIV/0! | 1 | #DIV/0! |
| Mir210 387206        | -1 | #DIV/0! | 1 | #DIV/0! |
| Cnih3 72978          | -1 | #DIV/0! | 1 | #DIV/0! |
| C130060K24Rik 243407 | -1 | #DIV/0! | 1 | #DIV/0! |
| Gm3750 100042254     | -1 | #DIV/0! | 1 | #DIV/0! |
| Vmn1r191 632534      | -1 | #DIV/0! | 1 | #DIV/0! |
| Zfp352 236537        | -1 | #DIV/0! | 1 | #DIV/0! |
| Olf850 258516        | -1 | #DIV/0! | 1 | #DIV/0! |
| Olf1444 258697       | -1 | #DIV/0! | 1 | #DIV/0! |
| Wfdc16 277345        | -1 | #DIV/0! | 1 | #DIV/0! |
| Olf916 258780        | -1 | #DIV/0! | 1 | #DIV/0! |
| 4930480E11Rik 74910  | -1 | #DIV/0! | 1 | #DIV/0! |
| Slc22a20 381203      | -1 | #DIV/0! | 1 | #DIV/0! |
| Ccdc83 75338         | -1 | #DIV/0! | 1 | #DIV/0! |
| Klk1b7-ps 16604      | -1 | #DIV/0! | 1 | #DIV/0! |
| Odf3 69287           | -1 | #DIV/0! | 1 | #DIV/0! |
| Olf1425 258155       | -1 | #DIV/0! | 1 | #DIV/0! |
| Gm5662 435337        | -1 | #DIV/0! | 1 | #DIV/0! |
| Gm12238 100303747    | -1 | #DIV/0! | 1 | #DIV/0! |
| Olf16 18313          | -1 | #DIV/0! | 1 | #DIV/0! |
| Prss55 71037         | -1 | #DIV/0! | 1 | #DIV/0! |
| Spink11 433181       | -1 | #DIV/0! | 1 | #DIV/0! |
| Snora23 100379145    | -1 | #DIV/0! | 1 | #DIV/0! |
| Clrn2 624224         | -1 | #DIV/0! | 1 | #DIV/0! |
| Mir29a 387222        | -1 | #DIV/0! | 1 | #DIV/0! |

|                      |    |         |   |         |
|----------------------|----|---------|---|---------|
| Mir669p-1 100526552  | -1 | #DIV/0! | 1 | #DIV/0! |
| Dgkb 217480          | -1 | #DIV/0! | 1 | #DIV/0! |
| Gm11559 100415785    | -1 | #DIV/0! | 1 | #DIV/0! |
| lapp 15874           | -1 | #DIV/0! | 1 | #DIV/0! |
| Zfp964 636741        | -1 | #DIV/0! | 1 | #DIV/0! |
| Vmn1r142 667464      | -1 | #DIV/0! | 1 | #DIV/0! |
| Aire 11634           | -1 | #DIV/0! | 1 | #DIV/0! |
| Olfr1037 259151      | -1 | #DIV/0! | 1 | #DIV/0! |
| Olfr666 259100       | -1 | #DIV/0! | 1 | #DIV/0! |
| 5730422E09Rik 433966 | -1 | #DIV/0! | 1 | #DIV/0! |
| Vmn2r103 627636      | -1 | #DIV/0! | 1 | #DIV/0! |
| Olfr593 258378       | -1 | #DIV/0! | 1 | #DIV/0! |
| Rbm11 224344         | -1 | #DIV/0! | 1 | #DIV/0! |
| 6330407J23Rik 67412  | -1 | #DIV/0! | 1 | #DIV/0! |
| Olfr1382 257971      | -1 | #DIV/0! | 1 | #DIV/0! |
| Gm4759 209380        | -1 | #DIV/0! | 1 | #DIV/0! |
| 4921528I01Rik 70950  | -1 | #DIV/0! | 1 | #DIV/0! |
| Gzmn 245839          | -1 | #DIV/0! | 1 | #DIV/0! |
| Gm10024 100009614    | -1 | #DIV/0! | 1 | #DIV/0! |
| AF529169 209743      | -1 | #DIV/0! | 1 | #DIV/0! |
| Efcab4b 381812       | -1 | #DIV/0! | 1 | #DIV/0! |
| Cdk5r2 12570         | -1 | #DIV/0! | 1 | #DIV/0! |
| Ldoc1 434784         | -1 | #DIV/0! | 1 | #DIV/0! |
| Scarna8 100217448    | -1 | #DIV/0! | 1 | #DIV/0! |
| Mir1901 100316686    | -1 | #DIV/0! | 1 | #DIV/0! |
| Klra6 16637          | -1 | #DIV/0! | 1 | #DIV/0! |
| Pnma1 70481          | -1 | #DIV/0! | 1 | #DIV/0! |
| Cdh24 239096         | -1 | #DIV/0! | 1 | #DIV/0! |
| Mir431 723866        | -1 | #DIV/0! | 1 | #DIV/0! |
| Prl3d2 215028        | -1 | #DIV/0! | 1 | #DIV/0! |
| Olfr129 258324       | -1 | #DIV/0! | 1 | #DIV/0! |
| Nts 67405            | -1 | #DIV/0! | 1 | #DIV/0! |
| Gbx2 14472           | -1 | #DIV/0! | 1 | #DIV/0! |
| Vmn1r3 100312471     | -1 | #DIV/0! | 1 | #DIV/0! |
| Hist1h2ag 319167     | -1 | #DIV/0! | 1 | #DIV/0! |
| ltgb8 320910         | -1 | #DIV/0! | 1 | #DIV/0! |
| Olfr1384 258464      | -1 | #DIV/0! | 1 | #DIV/0! |
| Sycp1-ps1 20958      | -1 | #DIV/0! | 1 | #DIV/0! |
| Snord38a 100217424   | -1 | #DIV/0! | 1 | #DIV/0! |
| Gm5072 278167        | -1 | #DIV/0! | 1 | #DIV/0! |
| Taar7e 276742        | -1 | #DIV/0! | 1 | #DIV/0! |
| Prol1 17830          | -1 | #DIV/0! | 1 | #DIV/0! |
| Cyp2j8 665095        | -1 | #DIV/0! | 1 | #DIV/0! |
| Kcne2 246133         | -1 | #DIV/0! | 1 | #DIV/0! |
| Prl8a6 19112         | -1 | #DIV/0! | 1 | #DIV/0! |
| Olfr199 404310       | -1 | #DIV/0! | 1 | #DIV/0! |
| Gm5567 434008        | -1 | #DIV/0! | 1 | #DIV/0! |
| Avpr1b 26361         | -1 | #DIV/0! | 1 | #DIV/0! |
| Gm12253 624860       | -1 | #DIV/0! | 1 | #DIV/0! |
| Tas2r105 57252       | -1 | #DIV/0! | 1 | #DIV/0! |
| Olfr630 259102       | -1 | #DIV/0! | 1 | #DIV/0! |
| Vmn1r128 667199      | -1 | #DIV/0! | 1 | #DIV/0! |
| Foxi1 14233          | -1 | #DIV/0! | 1 | #DIV/0! |

|                      |    |         |   |         |
|----------------------|----|---------|---|---------|
| Mir669a-1 735256     | -1 | #DIV/0! | 1 | #DIV/0! |
| Fbxo39 628100        | -1 | #DIV/0! | 1 | #DIV/0! |
| Olfr695 258591       | -1 | #DIV/0! | 1 | #DIV/0! |
| Olfr93 258051        | -1 | #DIV/0! | 1 | #DIV/0! |
| Acox1 74121          | -1 | #DIV/0! | 1 | #DIV/0! |
| Chrm2 243764         | -1 | #DIV/0! | 1 | #DIV/0! |
| Hoxd8 15437          | -1 | #DIV/0! | 1 | #DIV/0! |
| Crhr1 12921          | -1 | #DIV/0! | 1 | #DIV/0! |
| Olfr1364 258533      | -1 | #DIV/0! | 1 | #DIV/0! |
| Dll3 13389           | -1 | #DIV/0! | 1 | #DIV/0! |
| 9930023K05Rik 226245 | -1 | #DIV/0! | 1 | #DIV/0! |
| Slco6d1 70866        | -1 | #DIV/0! | 1 | #DIV/0! |
| Olfr237-ps1 258648   | -1 | #DIV/0! | 1 | #DIV/0! |
| Tspy-ps 22109        | -1 | #DIV/0! | 1 | #DIV/0! |
| Mir3073 100526547    | -1 | #DIV/0! | 1 | #DIV/0! |
| Car4 12351           | -1 | #DIV/0! | 1 | #DIV/0! |
| Olfr1184 258820      | -1 | #DIV/0! | 1 | #DIV/0! |
| Fgf10 14165          | -1 | #DIV/0! | 1 | #DIV/0! |
| A4gnt 333424         | -1 | #DIV/0! | 1 | #DIV/0! |
| Prss46 74306         | -1 | #DIV/0! | 1 | #DIV/0! |
| Olfr525 258958       | -1 | #DIV/0! | 1 | #DIV/0! |
| Vmn1r208 171252      | -1 | #DIV/0! | 1 | #DIV/0! |
| Olfr657 258309       | -1 | #DIV/0! | 1 | #DIV/0! |
| Gm13119 433779       | -1 | #DIV/0! | 1 | #DIV/0! |
| Ceacam16 330483      | -1 | #DIV/0! | 1 | #DIV/0! |
| Mir1983 100316716    | -1 | #DIV/0! | 1 | #DIV/0! |
| Mir3108 100526511    | -1 | #DIV/0! | 1 | #DIV/0! |
| Hsh2d 209488         | -1 | #DIV/0! | 1 | #DIV/0! |
| Tmem212 208613       | -1 | #DIV/0! | 1 | #DIV/0! |
| Lrrc66 231296        | -1 | #DIV/0! | 1 | #DIV/0! |
| Chrna10 504186       | -1 | #DIV/0! | 1 | #DIV/0! |
| Rpe65 19892          | -1 | #DIV/0! | 1 | #DIV/0! |
| Ctsg 13035           | -1 | #DIV/0! | 1 | #DIV/0! |
| Ccdc88a 108686       | -1 | #DIV/0! | 1 | #DIV/0! |
| Pga5 58803           | -1 | #DIV/0! | 1 | #DIV/0! |
| Frmd7 385354         | -1 | #DIV/0! | 1 | #DIV/0! |
| Grik1 14805          | -1 | #DIV/0! | 1 | #DIV/0! |
| Ceacam10 26366       | -1 | #DIV/0! | 1 | #DIV/0! |
| Mycs 17870           | -1 | #DIV/0! | 1 | #DIV/0! |
| Mir190 387185        | -1 | #DIV/0! | 1 | #DIV/0! |
| Myo16 244281         | -1 | #DIV/0! | 1 | #DIV/0! |
| Olfr247 258266       | -1 | #DIV/0! | 1 | #DIV/0! |
| Olfr1284 258379      | -1 | #DIV/0! | 1 | #DIV/0! |
| Snora19 100217439    | -1 | #DIV/0! | 1 | #DIV/0! |
| Gm12794 332923       | -1 | #DIV/0! | 1 | #DIV/0! |
| Tspan11 68498        | -1 | #DIV/0! | 1 | #DIV/0! |
| Olfr1355 257734      | -1 | #DIV/0! | 1 | #DIV/0! |
| Wee2 381759          | -1 | #DIV/0! | 1 | #DIV/0! |
| Olfr594 258246       | -1 | #DIV/0! | 1 | #DIV/0! |
| Olfr365 258656       | -1 | #DIV/0! | 1 | #DIV/0! |
| Gm6537 624918        | -1 | #DIV/0! | 1 | #DIV/0! |
| AU015836 385493      | -1 | #DIV/0! | 1 | #DIV/0! |
| E230016K23Rik 414102 | -1 | #DIV/0! | 1 | #DIV/0! |



|                      |    |         |   |         |
|----------------------|----|---------|---|---------|
| Zfp804b 207618       | -1 | #DIV/0! | 1 | #DIV/0! |
| Snord35b 27212       | -1 | #DIV/0! | 1 | #DIV/0! |
| Prss27 213171        | -1 | #DIV/0! | 1 | #DIV/0! |
| Sall3 20689          | -1 | #DIV/0! | 1 | #DIV/0! |
| Olfr1295 258398      | -1 | #DIV/0! | 1 | #DIV/0! |
| Olfr474 258488       | -1 | #DIV/0! | 1 | #DIV/0! |
| Fibcd1 98970         | -1 | #DIV/0! | 1 | #DIV/0! |
| Gm8882 667929        | -1 | #DIV/0! | 1 | #DIV/0! |
| Olfr463 258408       | -1 | #DIV/0! | 1 | #DIV/0! |
| Gm10921 668963       | -1 | #DIV/0! | 1 | #DIV/0! |
| Olfr323 258373       | -1 | #DIV/0! | 1 | #DIV/0! |
| Vmn1r87 171261       | -1 | #DIV/0! | 1 | #DIV/0! |
| Vmn1r228 171226      | -1 | #DIV/0! | 1 | #DIV/0! |
| Rnf183 76072         | -1 | #DIV/0! | 1 | #DIV/0! |
| Popdc3 78977         | -1 | #DIV/0! | 1 | #DIV/0! |
| Mir328 723841        | -1 | #DIV/0! | 1 | #DIV/0! |
| Olfr1155 258636      | -1 | #DIV/0! | 1 | #DIV/0! |
| Mir511 100124488     | -1 | #DIV/0! | 1 | #DIV/0! |
| Vmn1r114 100042996   | -1 | #DIV/0! | 1 | #DIV/0! |
| E130114P18Rik 319865 | -1 | #DIV/0! | 1 | #DIV/0! |
| Grin2a 14811         | -1 | #DIV/0! | 1 | #DIV/0! |
| Gm2176 100039348     | -1 | #DIV/0! | 1 | #DIV/0! |
| Vmn1r220 171271      | -1 | #DIV/0! | 1 | #DIV/0! |
| Gcet2 14525          | -1 | #DIV/0! | 1 | #DIV/0! |
| Lcn11 227630         | -1 | #DIV/0! | 1 | #DIV/0! |
| Fndc3c1 333564       | -1 | #DIV/0! | 1 | #DIV/0! |
| Pcdh11x 245578       | -1 | #DIV/0! | 1 | #DIV/0! |
| Reg2 19693           | -1 | #DIV/0! | 1 | #DIV/0! |
| Actl9 69481          | -1 | #DIV/0! | 1 | #DIV/0! |
| Olfr1132 258833      | -1 | #DIV/0! | 1 | #DIV/0! |
| Mir106b 723925       | -1 | #DIV/0! | 1 | #DIV/0! |
| Tigd4 403175         | -1 | #DIV/0! | 1 | #DIV/0! |
| Ang6 630952          | -1 | #DIV/0! | 1 | #DIV/0! |
| Olfr203 258479       | -1 | #DIV/0! | 1 | #DIV/0! |
| Coch 12810           | -1 | #DIV/0! | 1 | #DIV/0! |
| 6030405A18Rik 329641 | -1 | #DIV/0! | 1 | #DIV/0! |
| Rassf9 237504        | -1 | #DIV/0! | 1 | #DIV/0! |
| 8430431K14Rik 78103  | -1 | #DIV/0! | 1 | #DIV/0! |
| Rhox7 547168         | -1 | #DIV/0! | 1 | #DIV/0! |
| 2310057N15Rik 69696  | -1 | #DIV/0! | 1 | #DIV/0! |
| 1700108M19Rik 71156  | -1 | #DIV/0! | 1 | #DIV/0! |
| Adam30 71078         | -1 | #DIV/0! | 1 | #DIV/0! |
| Scg3 20255           | -1 | #DIV/0! | 1 | #DIV/0! |
| Slc6a2 20538         | -1 | #DIV/0! | 1 | #DIV/0! |
| Olfr1416 259040      | -1 | #DIV/0! | 1 | #DIV/0! |
| Gm3238 100041261     | -1 | #DIV/0! | 1 | #DIV/0! |
| Ankrd6 140577        | -1 | #DIV/0! | 1 | #DIV/0! |
| Mir301 723834        | -1 | #DIV/0! | 1 | #DIV/0! |
| Mir3088 100526498    | -1 | #DIV/0! | 1 | #DIV/0! |
| Klk1b8 16624         | -1 | #DIV/0! | 1 | #DIV/0! |
| Cyp19a1 13075        | -1 | #DIV/0! | 1 | #DIV/0! |
| Snap91 20616         | -1 | #DIV/0! | 1 | #DIV/0! |
| Vmn1r107 673977      | -1 | #DIV/0! | 1 | #DIV/0! |

|                        |    |         |   |         |
|------------------------|----|---------|---|---------|
| Bpifb9a 71425          | -1 | #DIV/0! | 1 | #DIV/0! |
| Shroom4 208431         | -1 | #DIV/0! | 1 | #DIV/0! |
| Lhx3 16871             | -1 | #DIV/0! | 1 | #DIV/0! |
| Vmn1r43 113847         | -1 | #DIV/0! | 1 | #DIV/0! |
| Nlgn1 192167           | -1 | #DIV/0! | 1 | #DIV/0! |
| Raly1 76897            | -1 | #DIV/0! | 1 | #DIV/0! |
| Mt4 17752              | -1 | #DIV/0! | 1 | #DIV/0! |
| Olfr967 258086         | -1 | #DIV/0! | 1 | #DIV/0! |
| Crct1 74175            | -1 | #DIV/0! | 1 | #DIV/0! |
| LOC100043315 100043315 | -1 | #DIV/0! | 1 | #DIV/0! |
| 4933402N22Rik 545732   | -1 | #DIV/0! | 1 | #DIV/0! |
| Olfr1217 258903        | -1 | #DIV/0! | 1 | #DIV/0! |
| Bmx 12169              | -1 | #DIV/0! | 1 | #DIV/0! |
| Hist1h3d 319149        | -1 | #DIV/0! | 1 | #DIV/0! |
| 3830417A13Rik 70696    | -1 | #DIV/0! | 1 | #DIV/0! |
| Mir1981 100316821      | -1 | #DIV/0! | 1 | #DIV/0! |
| Olfr992 258865         | -1 | #DIV/0! | 1 | #DIV/0! |
| Cyp2b19 13090          | -1 | #DIV/0! | 1 | #DIV/0! |
| Olfr798 258549         | -1 | #DIV/0! | 1 | #DIV/0! |
| Cdh12 215654           | -1 | #DIV/0! | 1 | #DIV/0! |
| Vmn1r205 171251        | -1 | #DIV/0! | 1 | #DIV/0! |
| Slc16a8 57274          | -1 | #DIV/0! | 1 | #DIV/0! |
| Klra1 16627            | -1 | #DIV/0! | 1 | #DIV/0! |
| Vmn1r49 24112          | -1 | #DIV/0! | 1 | #DIV/0! |
| Olfr854 258515         | -1 | #DIV/0! | 1 | #DIV/0! |
| Olfr1241 258447        | -1 | #DIV/0! | 1 | #DIV/0! |
| Ftmt 67634             | -1 | #DIV/0! | 1 | #DIV/0! |
| Snord45b 100217468     | -1 | #DIV/0! | 1 | #DIV/0! |
| Spz1 79401             | -1 | #DIV/0! | 1 | #DIV/0! |
| Nptx2 53324            | -1 | #DIV/0! | 1 | #DIV/0! |
| Gm5382 385328          | -1 | #DIV/0! | 1 | #DIV/0! |
| Mir105 100124463       | -1 | #DIV/0! | 1 | #DIV/0! |
| Foxb1 64290            | -1 | #DIV/0! | 1 | #DIV/0! |
| Serpina9 71907         | -1 | #DIV/0! | 1 | #DIV/0! |
| C230004F18Rik 331424   | -1 | #DIV/0! | 1 | #DIV/0! |
| Klrb1f 232408          | -1 | #DIV/0! | 1 | #DIV/0! |
| Vmn1r65 81013          | -1 | #DIV/0! | 1 | #DIV/0! |
| Taar1 111174           | -1 | #DIV/0! | 1 | #DIV/0! |
| Dok6 623279            | -1 | #DIV/0! | 1 | #DIV/0! |
| AY026312 170939        | -1 | #DIV/0! | 1 | #DIV/0! |
| Snora68 104370         | -1 | #DIV/0! | 1 | #DIV/0! |
| Art2a-ps 11871         | -1 | #DIV/0! | 1 | #DIV/0! |
| Gm7534 665186          | -1 | #DIV/0! | 1 | #DIV/0! |
| Krtap9-3 75586         | -1 | #DIV/0! | 1 | #DIV/0! |
| Mir18b 100124431       | -1 | #DIV/0! | 1 | #DIV/0! |
| Otog 18419             | -1 | #DIV/0! | 1 | #DIV/0! |
| Bcl2a1c 12046          | -1 | #DIV/0! | 1 | #DIV/0! |
| Asphd2 72898           | -1 | #DIV/0! | 1 | #DIV/0! |
| 4933433C11Rik 74472    | -1 | #DIV/0! | 1 | #DIV/0! |
| Defb8 244334           | -1 | #DIV/0! | 1 | #DIV/0! |
| Defb28 545475          | -1 | #DIV/0! | 1 | #DIV/0! |
| Serpib6d 238568        | -1 | #DIV/0! | 1 | #DIV/0! |
| Elavl2 15569           | -1 | #DIV/0! | 1 | #DIV/0! |

|                         |              |             |              |             |
|-------------------------|--------------|-------------|--------------|-------------|
| Cxx1b 553127            | -1.000066526 | 0.499844477 | -1.128214457 | 0.151627474 |
| Zfp157 72154            | -1.00010845  | 0.499852834 | -1.134896732 | 0.320615039 |
| lpo11 76582             | -1.000218376 | 0.499711918 | -1.000218376 | 0.499711918 |
| AW555464 217882         | -1.000221163 | 0.499200363 | -1.056670294 | 0.308015224 |
| Vim 22352               | -1.000253609 | 0.499539219 | 1.114859963  | 0.289526788 |
| Ssna1 68475             | -1.000297168 | 0.499426798 | -1.000297168 | 0.499426798 |
| Edem3 66967             | -1.000298463 | 0.49959974  | 1.138846281  | 0.207946877 |
| Chsy1 269941            | -1.000407005 | 0.499309283 | 1.116992918  | 0.301937037 |
| Tsc22d4 78829           | -1.00046643  | 0.498644758 | 1.081896954  | 0.250196848 |
| Rbp4 19662              | -1.000487208 | 0.498831325 | -1.214913736 | 0.056408459 |
| Vps36 70160             | -1.000505612 | 0.498913955 | -1.222319584 | 0.086775891 |
| Tgfa 21802              | -1.000651406 | 0.499218477 | 1.188127614  | 0.312285685 |
| Vcp 269523              | -1.000657968 | 0.496564281 | -1.046059295 | 0.24929852  |
| Coro1c 23790            | -1.000673177 | 0.49552627  | 1.030092969  | 0.306180462 |
| Azgp1 12007             | -1.000715132 | 0.496657422 | -1.067191149 | 0.128027901 |
| Pkhd1 241035            | -1.000720585 | 0.4990249   | 1.168372411  | 0.306219536 |
| 2700062C07Rik 68046     | -1.000730398 | 0.49836713  | -1.122927186 | 0.242128499 |
| Spr 20751               | -1.000789767 | 0.498031101 | -1.111618108 | 0.234221442 |
| Npr13 17168             | -1.00081732  | 0.498039169 | -1.081086797 | 0.307660993 |
| G630090E17Rik 100041085 | -1.000848682 | 0.497554482 | -1.076853876 | 0.294164184 |
| Myo1f 17916             | -1.000858536 | 0.498901485 | -1.44377103  | 0.0628428   |
| Rexo2 104444            | -1.000860816 | 0.497253829 | -1.000860816 | 0.497253829 |
| Gm5803 545091           | -1.000875788 | 0.498842804 | -1.000875788 | 0.498842804 |
| Mcf2 193813             | -1.000897099 | 0.497748501 | 1.103535465  | 0.217070057 |
| Mxi1 17859              | -1.000953992 | 0.497366197 | 1.030226397  | 0.405419999 |
| Mef2c 17260             | -1.000991693 | 0.499409403 | -1.700998606 | 0.240444782 |
| Aqp1 11826              | -1.001016315 | 0.496913996 | -1.146561929 | 0.109328035 |
| Mettl13 71449           | -1.00107397  | 0.497972294 | -1.106306348 | 0.30027142  |
| Tmem9 66241             | -1.001166809 | 0.494794028 | -1.050003087 | 0.273428207 |
| Cebpz 12607             | -1.001296526 | 0.495553921 | -1.129222044 | 0.112964064 |
| Zfp619 70227            | -1.001316765 | 0.499463222 | -2.76078     | 0.173296754 |
| Npc1 18145              | -1.001408403 | 0.49721009  | -1.001408403 | 0.49721009  |
| Vnn3 26464              | -1.001493301 | 0.495142284 | -1.150893096 | 0.065862662 |
| 41154 18000             | -1.001523609 | 0.496098885 | 1.087309968  | 0.292225983 |
| Smc1b 140557            | -1.001550199 | 0.499319463 | -3.98415     | 0.093264411 |
| Itgb1bp2 26549          | -1.001550199 | 0.499319463 | -3.98415     | 0.093264411 |
| Hmmr 15366              | -1.001550199 | 0.499319463 | -3.98415     | 0.093264411 |
| Ovgp1 12659             | -1.001550199 | 0.499319463 | -3.98415     | 0.093264411 |
| Cd244 18106             | -1.001550199 | 0.499319463 | -3.98415     | 0.093264411 |
| Zmynd8 228880           | -1.001571959 | 0.494895222 | 1.106010217  | 0.122645768 |
| Pex11c 69129            | -1.001580811 | 0.495429204 | -1.001580811 | 0.495429204 |
| Rpl4 67891              | -1.001636007 | 0.496220254 | -1.097416854 | 0.295104997 |
| Wdfy3 72145             | -1.001763286 | 0.496938169 | -1.001763286 | 0.496938169 |
| Slc40a1 53945           | -1.001786444 | 0.493545573 | 1.057242873  | 0.192784325 |
| Cdc42 12540             | -1.001792823 | 0.493988496 | 1.091988655  | 0.176689411 |
| Phldb3 232970           | -1.001883504 | 0.496270761 | 1.109868345  | 0.179629958 |
| Ddc 13195               | -1.001913376 | 0.493945276 | -1.001913376 | 0.493945276 |
| Mgat4b 103534           | -1.002025274 | 0.493559484 | 1.048539685  | 0.359065879 |
| Adipor1 72674           | -1.002038738 | 0.492541066 | -1.053712573 | 0.30690125  |
| Usp36 72344             | -1.002054574 | 0.49567669  | 1.143261409  | 0.209866405 |
| Aftph 216549            | -1.002068454 | 0.492971397 | 1.074737636  | 0.249622716 |
| Zswim7 69747            | -1.002192369 | 0.495347912 | -1.028114871 | 0.427728672 |
| Slc25a1 13358           | -1.00221639  | 0.489721149 | -1.110155581 | 0.033247589 |

|                     |              |             |              |             |
|---------------------|--------------|-------------|--------------|-------------|
| Cuta 67675          | -1.002326469 | 0.494703293 | 1.00391699   | 0.487509962 |
| Mad1l1 17120        | -1.002371579 | 0.495135588 | 1.076894819  | 0.347563246 |
| Nsfl1c 386649       | -1.002373625 | 0.488776394 | 1.038344168  | 0.319081041 |
| Ripk1 19766         | -1.00244911  | 0.492847186 | 1.057787546  | 0.345515154 |
| 4632428N05Rik 74048 | -1.002487382 | 0.495430622 | -1.267420751 | 0.096080638 |
| Smad1 17125         | -1.002502256 | 0.492555814 | 1.068511153  | 0.309371298 |
| Erap1 80898         | -1.002514882 | 0.495889479 | -1.009787561 | 0.482809225 |
| Sf3b1 81898         | -1.002563151 | 0.495341042 | 1.296008839  | 0.047219017 |
| Oxa1 69089          | -1.002588451 | 0.49078603  | -1.002588451 | 0.49078603  |
| Eif4enif1 74203     | -1.00261785  | 0.494402485 | 1.133094396  | 0.228528125 |
| Tcf21 21412         | -1.00262964  | 0.496322614 | -1.201928702 | 0.25622666  |
| Plek 56193          | -1.002650222 | 0.498290264 | 1.861388373  | 0.151782945 |
| Homer2 26557        | -1.002685029 | 0.492999749 | -1.088412459 | 0.287685599 |
| Spsb1 74646         | -1.002685861 | 0.496313678 | 1.163540529  | 0.266966271 |
| Mllt11 56772        | -1.002721251 | 0.496954398 | 1.20185781   | 0.314002842 |
| Sertad2 58172       | -1.002775507 | 0.494977328 | -1.184834716 | 0.185679231 |
| H13 14950           | -1.002868591 | 0.492642546 | -1.000184767 | 0.499374015 |
| Tomm40 53333        | -1.002887264 | 0.491960764 | -1.002887264 | 0.491960764 |
| E2f2 242705         | -1.002944512 | 0.498061741 | -1.603370829 | 0.237225529 |
| Lsm6 78651          | -1.00295136  | 0.493311924 | -1.204997494 | 0.10910073  |
| Nudt19 110959       | -1.003096579 | 0.488712668 | -1.042049081 | 0.312645531 |
| Cnksr3 215748       | -1.003106969 | 0.493053537 | -1.119046605 | 0.214081735 |
| Hps4 192232         | -1.003204235 | 0.491341586 | 1.174815916  | 0.079219119 |
| Fam165b 68936       | -1.003266709 | 0.493480639 | -1.003266709 | 0.493480639 |
| Chmp2a 68953        | -1.003293234 | 0.492541881 | -1.097096348 | 0.301487875 |
| Higd1a 56295        | -1.003348362 | 0.486688198 | -1.05860195  | 0.279427651 |
| Ccdc71 72454        | -1.003361573 | 0.475710699 | 1.03266187   | 0.250879292 |
| Mkl1 223701         | -1.003371889 | 0.492384661 | 1.027191099  | 0.395537335 |
| Rpain 69723         | -1.003379083 | 0.490231742 | -1.177183732 | 0.055692167 |
| Arrb1 109689        | -1.003397991 | 0.48800402  | -1.124907627 | 0.086258535 |
| Rps29 20090         | -1.003399329 | 0.497263414 | 1.513614703  | 0.19563049  |
| Slc22a17 59049      | -1.003462187 | 0.495572469 | -1.268226212 | 0.204154455 |
| Cyth2 19158         | -1.003495377 | 0.489287569 | 1.077218322  | 0.270965662 |
| Safb 224903         | -1.003621243 | 0.487976637 | -1.003621243 | 0.487976637 |
| Eprs 107508         | -1.003641391 | 0.478151067 | -1.03412978  | 0.308108135 |
| Vtn 22370           | -1.003660733 | 0.493592133 | -1.0690491   | 0.324556222 |
| Krtcap2 66059       | -1.003711782 | 0.491370532 | -1.099900381 | 0.288742468 |
| Slc25a40 319653     | -1.003738992 | 0.497696609 | 1.24673798   | 0.369951756 |
| Tceal8 66684        | -1.003775473 | 0.49155846  | -1.232973839 | 0.046113672 |
| Mob2 101513         | -1.003822088 | 0.492819913 | -1.29925595  | 0.036873389 |
| H2-K1 14972         | -1.003844639 | 0.484501754 | -1.103875929 | 0.104065938 |
| 2310022A10Rik 66367 | -1.003905446 | 0.487147125 | -1.003905446 | 0.487147125 |
| Smad5 17129         | -1.003927879 | 0.486638693 | -1.071785495 | 0.269489861 |
| BC048355 381101     | -1.003933192 | 0.489366134 | 1.069850374  | 0.309782722 |
| Kctd17 72844        | -1.003956751 | 0.492881503 | -1.099582027 | 0.326710785 |
| Srgap3 259302       | -1.004020067 | 0.494916438 | -1.191354084 | 0.297349342 |
| Tnfaip1 21927       | -1.00402644  | 0.482543242 | 1.037718634  | 0.338024654 |
| Suclg1 56451        | -1.004030922 | 0.479769542 | -1.060505455 | 0.190681382 |
| Smarcad1 13990      | -1.004054115 | 0.493562307 | 1.188259586  | 0.227318789 |
| Farp1 223254        | -1.004193616 | 0.490301945 | 1.10283179   | 0.276904897 |
| Ptma 19231          | -1.004213097 | 0.482604835 | 1.012370736  | 0.432767501 |
| Cntfr 12804         | -1.004238295 | 0.492006941 | -1.004238295 | 0.492006941 |
| Gm9199 668489       | -1.004241094 | 0.497125346 | 1.4358054    | 0.292430042 |

|                         |              |             |              |             |
|-------------------------|--------------|-------------|--------------|-------------|
| Rbm38 56190             | -1.004265215 | 0.495014538 | -1.166964687 | 0.301079282 |
| Zbtb11 271377           | -1.004282359 | 0.495841806 | -1.608909321 | 0.087823726 |
| Itfg2 101142            | -1.004407687 | 0.477330411 | 1.023929788  | 0.381683476 |
| Zbtb7a 16969            | -1.004443028 | 0.488164356 | 1.004097473  | 0.481982178 |
| Gm3258 100041294        | -1.004447061 | 0.488028887 | -1.031139544 | 0.425632727 |
| Creb1 12912             | -1.004455057 | 0.494373861 | 1.157521577  | 0.298848024 |
| Stk40 74178             | -1.004468872 | 0.474491835 | -1.049539916 | 0.219111944 |
| Zfp408 381410           | -1.004621975 | 0.486821125 | -1.002030616 | 0.492902673 |
| Rrp8 101867             | -1.004693984 | 0.482513265 | 1.001765374  | 0.492004283 |
| Prcc 94315              | -1.004704021 | 0.488132509 | -1.105368538 | 0.25196378  |
| Abca5 217265            | -1.004712664 | 0.495080511 | -1.004712664 | 0.495080511 |
| Ras111b 68939           | -1.004743649 | 0.491080912 | -1.004743649 | 0.491080912 |
| Mrpl15 27395            | -1.004767813 | 0.487610051 | -1.080190937 | 0.195314422 |
| Ccdc107 622404          | -1.004768798 | 0.491166436 | 1.010749385  | 0.474893515 |
| Abcd4 19300             | -1.004952128 | 0.489533369 | -1.004952128 | 0.489533369 |
| Eaf1 74427              | -1.00496096  | 0.493846542 | 1.44431709   | 0.072330542 |
| Cad 69719               | -1.005105505 | 0.487347598 | -1.074996929 | 0.333799137 |
| Efr3a 76740             | -1.005119537 | 0.483366453 | -1.084411046 | 0.237197706 |
| Agpat3 28169            | -1.005157137 | 0.464446231 | -1.005157137 | 0.464446231 |
| Ddx46 212880            | -1.005165165 | 0.492405886 | 1.23191265   | 0.185198703 |
| Mamld1 333639           | -1.005226199 | 0.496586031 | -1.547243792 | 0.231027677 |
| Klf2 16598              | -1.005244234 | 0.490153425 | 1.177703973  | 0.17129259  |
| Calcoco1 67488          | -1.005303857 | 0.474131461 | -1.040449627 | 0.158845321 |
| Pnpla7 241274           | -1.005330369 | 0.483721783 | 1.013464733  | 0.444272944 |
| Fcgrt 14132             | -1.005346174 | 0.483919699 | 1.011763648  | 0.454540964 |
| 2510002D24Rik 72307     | -1.005479453 | 0.486636032 | -1.005479453 | 0.486636032 |
| A430105I19Rik 214239    | -1.005481691 | 0.493422939 | -1.20292438  | 0.246808271 |
| Gm11127 100529082       | -1.005529388 | 0.489703091 | -1.04273492  | 0.404958942 |
| Shc1 20416              | -1.005534575 | 0.472573697 | 1.069618892  | 0.059445749 |
| Reps1 19707             | -1.005547823 | 0.489534985 | 1.067531967  | 0.387604509 |
| Pogk 71592              | -1.005634368 | 0.492541136 | 1.409000647  | 0.072485385 |
| Hmgn2 15331             | -1.005679914 | 0.487595996 | 1.088243088  | 0.304004914 |
| Fuk 234730              | -1.005711618 | 0.488224239 | -1.005711618 | 0.488224239 |
| Al316807 102032         | -1.005731138 | 0.474432162 | 1.044680598  | 0.303045346 |
| 2310001A20Rik 71881     | -1.00580067  | 0.481027988 | -1.104701764 | 0.092653545 |
| Jmjd7 433466            | -1.005888354 | 0.494346762 | -1.312887705 | 0.264402531 |
| Smtnl2 276829           | -1.005955983 | 0.496961328 | -1.893566965 | 0.212929597 |
| Tmx1 72736              | -1.005963394 | 0.485332464 | 1.04400405   | 0.402957044 |
| Stard5 170460           | -1.00597889  | 0.48020652  | 1.142560385  | 0.064095887 |
| Tap1 21354              | -1.006063574 | 0.488058838 | -1.054915067 | 0.363877177 |
| Zmat2 66492             | -1.00610091  | 0.469402439 | -1.044076894 | 0.294106453 |
| 5430417L22Rik 100043272 | -1.006186049 | 0.486170912 | 1.045297317  | 0.360618876 |
| Plcg1 18803             | -1.006225527 | 0.480129382 | -1.005824745 | 0.468351556 |
| Nudt2 66401             | -1.00642425  | 0.488160665 | -1.00642425  | 0.488160665 |
| 40973 69104             | -1.006461732 | 0.4739953   | -1.051847788 | 0.297880094 |
| Dtnbp1 94245            | -1.006494891 | 0.485420699 | -1.096734356 | 0.305637498 |
| Afg3l1 114896           | -1.006508274 | 0.464773486 | -1.058749659 | 0.154225715 |
| Ppfia1 233977           | -1.006521577 | 0.489945557 | 1.228435476  | 0.164804769 |
| D10Wsu102e 28109        | -1.006563821 | 0.483748351 | -1.094917726 | 0.28628946  |
| Net1 56349              | -1.006586728 | 0.485200625 | -1.107878909 | 0.280690559 |
| Trpc4ap 56407           | -1.006600065 | 0.475542596 | -1.077544409 | 0.221611757 |
| Mpp6 56524              | -1.006602048 | 0.468697618 | -1.108283012 | 0.029277064 |
| Arih1 23806             | -1.006613601 | 0.483881108 | 1.116175241  | 0.217006068 |

|                      |              |             |              |             |
|----------------------|--------------|-------------|--------------|-------------|
| Crcp 12909           | -1.006657366 | 0.483102258 | 1.072279555  | 0.313805924 |
| Lsg1 224092          | -1.006674345 | 0.479298229 | -1.061287148 | 0.317531671 |
| Ndufs2 226646        | -1.006706705 | 0.44252716  | 1.015392967  | 0.368504584 |
| Uevld 54122          | -1.006744638 | 0.494372074 | 1.44731878   | 0.21808598  |
| Chuk 12675           | -1.006773476 | 0.487171165 | 1.132163939  | 0.268015594 |
| Rmnd1 66084          | -1.006829668 | 0.485964202 | -1.006829668 | 0.485964202 |
| Syn1 20964           | -1.006832031 | 0.49397609  | -1.006832031 | 0.49397609  |
| Slc25a28 246696      | -1.006845945 | 0.478599374 | -1.006845945 | 0.478599374 |
| Slc16a6 104681       | -1.006872247 | 0.492581533 | 1.512617567  | 0.090170125 |
| Casc3 192160         | -1.0068954   | 0.48090795  | 1.159144594  | 0.104856387 |
| Apol7e 666348        | -1.006925777 | 0.496790846 | -1.7804      | 0.173296754 |
| Dync1i2 13427        | -1.006979379 | 0.48703788  | -1.101585788 | 0.335281409 |
| 4833439L19Rik 97820  | -1.007010077 | 0.478501694 | 1.058973948  | 0.315474941 |
| Pglyrp1 21946        | -1.007207676 | 0.49720062  | -1.262599539 | 0.402575049 |
| Smarca5 93762        | -1.007319086 | 0.483527972 | 1.112453029  | 0.214658655 |
| Btdb7 238386         | -1.00734753  | 0.494312112 | 1.364669794  | 0.28997094  |
| Gm11428 100034251    | -1.007443553 | 0.489029797 | 1.095504804  | 0.364125115 |
| Gm15455 433287       | -1.007478691 | 0.485500489 | -1.007478691 | 0.485500489 |
| Inpp1 16332          | -1.007530072 | 0.463035614 | -1.05319658  | 0.25219222  |
| Mthfsd 234814        | -1.007540877 | 0.478627143 | -1.180489471 | 0.063525568 |
| Calu 12321           | -1.007684971 | 0.472476015 | -1.007684971 | 0.472476015 |
| Gpr116 224792        | -1.007687937 | 0.481311207 | 1.229078454  | 0.007552908 |
| Trim8 93679          | -1.007695664 | 0.45573622  | 1.077459466  | 0.053787025 |
| Ap4m1 11781          | -1.007757152 | 0.490833234 | 1.211464932  | 0.190855277 |
| Pphln1 223828        | -1.007791342 | 0.481531491 | 1.192296116  | 0.090112107 |
| Zfp563 240068        | -1.007817873 | 0.490577822 | -1.007817873 | 0.490577822 |
| Mier2 70427          | -1.007829878 | 0.478413542 | -1.05639247  | 0.325327492 |
| Ap2b1 71770          | -1.007845083 | 0.467824705 | 1.113627837  | 0.051363693 |
| Bnip2 12175          | -1.007864706 | 0.481148443 | -1.007864706 | 0.481148443 |
| Ciita 12265          | -1.007881731 | 0.495970361 | 2.293962892  | 0.168028304 |
| Cd68 12514           | -1.007937151 | 0.483828659 | -1.009897125 | 0.466951887 |
| Pdp1 381511          | -1.007989058 | 0.49674815  | -2.8         | 0.173296754 |
| Pcdhb18 93889        | -1.007989058 | 0.49674815  | -2.8         | 0.173296754 |
| Ythdf1 228994        | -1.008058645 | 0.476089848 | -1.008058645 | 0.476089848 |
| Perp 64058           | -1.008072664 | 0.465497034 | -1.008072664 | 0.465497034 |
| Mkks 59030           | -1.008120597 | 0.467784228 | 1.104520192  | 0.101116017 |
| Ifngr1 15979         | -1.008212568 | 0.481892955 | -1.153291744 | 0.081645806 |
| Alg2 56737           | -1.008218195 | 0.483620784 | -1.008218195 | 0.483620784 |
| 9330111N05Rik 319983 | -1.008223578 | 0.482325407 | -1.008223578 | 0.482325407 |
| Azi1 12009           | -1.008247043 | 0.483468703 | -1.008247043 | 0.483468703 |
| Fbxl6 30840          | -1.008313642 | 0.469174908 | -1.008313642 | 0.469174908 |
| Nolc1 70769          | -1.008340387 | 0.467169367 | 1.053450771  | 0.287983637 |
| Herpud2 80517        | -1.008351306 | 0.486209054 | -1.078222689 | 0.359186483 |
| Rap2a 76108          | -1.00835702  | 0.487076361 | -1.169661775 | 0.272546932 |
| Ube2q1 70093         | -1.008395697 | 0.455080367 | -1.008395697 | 0.455080367 |
| Zbtb22 81630         | -1.008407524 | 0.469649596 | 1.068294638  | 0.243410145 |
| Dhcr7 13360          | -1.008432459 | 0.471882753 | 1.068039852  | 0.272432954 |
| Retsat 67442         | -1.008517458 | 0.479734011 | 1.08407342   | 0.312904356 |
| Maea 59003           | -1.008524772 | 0.458604409 | -1.008524772 | 0.458604409 |
| Zfp330 30932         | -1.00862235  | 0.475352722 | 1.021831495  | 0.386637023 |
| Zfp707 69020         | -1.008671119 | 0.468501731 | -1.136824935 | 0.073691269 |
| Psm5 66998           | -1.008684934 | 0.481515897 | 1.030733926  | 0.414965323 |
| Pafah1b2 18475       | -1.0086924   | 0.47277594  | -1.064079474 | 0.307209424 |

|                     |              |             |              |             |
|---------------------|--------------|-------------|--------------|-------------|
| Cpsf4 54188         | -1.008771274 | 0.469599481 | 1.110474353  | 0.135973626 |
| Slc7a6os 66432      | -1.008821414 | 0.473937387 | 1.158475362  | 0.063107374 |
| Brms1 107392        | -1.008990809 | 0.477691375 | -1.008990809 | 0.477691375 |
| Polr2c 20021        | -1.008994147 | 0.478031762 | -1.008994147 | 0.478031762 |
| Lig1 16881          | -1.009064273 | 0.488751035 | 1.177050028  | 0.313142235 |
| Rrp1b 72462         | -1.009113516 | 0.485730659 | -1.282282662 | 0.075238759 |
| Sgk2 27219          | -1.009141614 | 0.466415221 | -1.071629243 | 0.253371483 |
| Cadm1 54725         | -1.009157193 | 0.474035898 | -1.189033424 | 0.035811804 |
| Rictor 78757        | -1.009213523 | 0.489751268 | -1.009213523 | 0.489751268 |
| Mrpl41 107733       | -1.009237732 | 0.479859282 | 1.077729428  | 0.32932327  |
| Cish 12700          | -1.009260825 | 0.467720744 | 1.005981904  | 0.474526321 |
| Rrn3 106298         | -1.009269206 | 0.475023161 | 1.100342016  | 0.223156962 |
| Sema5a 20356        | -1.009316207 | 0.493175485 | -1.009316207 | 0.493175485 |
| Pnp 18950           | -1.009414856 | 0.464214707 | 1.106152126  | 0.123145585 |
| Sertad3 170742      | -1.009444426 | 0.474972364 | 1.103209936  | 0.219458042 |
| Chrna2 110902       | -1.009476801 | 0.473963745 | 1.093625875  | 0.198134428 |
| Golph3 66629        | -1.00949447  | 0.484225661 | 1.10317045   | 0.32813769  |
| Ninj1 18081         | -1.009526838 | 0.480259799 | -1.04013316  | 0.384804368 |
| Polr2b 231329       | -1.009533628 | 0.477952414 | -1.225124952 | 0.04629953  |
| Gmds 218138         | -1.009567421 | 0.488835746 | 1.103543446  | 0.380204109 |
| Car5b 56078         | -1.00959325  | 0.486194264 | -1.00959325  | 0.486194264 |
| Pygb 110078         | -1.009624394 | 0.482247518 | 1.176728191  | 0.174616499 |
| Hs3st3a1 15478      | -1.009740329 | 0.49161455  | -1.426193587 | 0.17974999  |
| Elmo1 140580        | -1.009752622 | 0.487916055 | 1.46414219   | 0.037355499 |
| Mastl 67121         | -1.009766255 | 0.495725951 | -4.016833333 | 0.093227909 |
| 2310007B03Rik 71874 | -1.009766255 | 0.495725951 | -4.016833333 | 0.093227909 |
| Lekr1 624866        | -1.009766255 | 0.495725951 | -4.016833333 | 0.093227909 |
| Vdr 22337           | -1.009766255 | 0.495725951 | -4.016833333 | 0.093227909 |
| Fam184a 75906       | -1.009766255 | 0.495725951 | -4.016833333 | 0.093227909 |
| Wfdc3 71856         | -1.009766255 | 0.495725951 | -4.016833333 | 0.093227909 |
| Ces3b 13909         | -1.009840001 | 0.473003427 | -1.018160818 | 0.425719581 |
| Sat2 69215          | -1.009888868 | 0.473805042 | -1.009888868 | 0.473805042 |
| Zdhhc14 224454      | -1.010057265 | 0.480791161 | -1.270652504 | 0.080180145 |
| Sdhd 66925          | -1.010094555 | 0.447414048 | 1.02754111   | 0.358182858 |
| Eri3 140546         | -1.010181752 | 0.472900441 | -1.128917929 | 0.16505362  |
| Camk2n2 73047       | -1.010189176 | 0.480524848 | 1.112712849  | 0.301726765 |
| Sec11c 66286        | -1.010200629 | 0.48111833  | -1.181417689 | 0.190224716 |
| Thap4 67026         | -1.010231995 | 0.467207911 | -1.010231995 | 0.467207911 |
| Zmym3 56364         | -1.010283182 | 0.480503606 | -1.123950544 | 0.293048896 |
| 0610007P22Rik 68327 | -1.010295566 | 0.472479474 | -1.010295566 | 0.472479474 |
| Ivns1abp 117198     | -1.010362206 | 0.479872257 | 1.156125847  | 0.198975504 |
| Tmsb4x 19241        | -1.01036414  | 0.485960721 | -1.362116403 | 0.042575778 |
| Gnb5 14697          | -1.010429306 | 0.491804739 | -1.448134364 | 0.244553918 |
| Trim34a 94094       | -1.010432839 | 0.4863821   | -1.278957027 | 0.185288458 |
| Rab13 68328         | -1.010540789 | 0.486354442 | -1.292437486 | 0.171597439 |
| Rnasel 24014        | -1.01054626  | 0.485389094 | -1.185906281 | 0.281553993 |
| Mrpl48 52443        | -1.010564348 | 0.477733777 | 1.101927616  | 0.29892755  |
| Usp5 22225          | -1.010578121 | 0.451356726 | -1.010578121 | 0.451356726 |
| Tbc1d15 66687       | -1.010607846 | 0.479433835 | -1.029562495 | 0.424942879 |
| Kat2b 18519         | -1.010662626 | 0.482854791 | -1.010662626 | 0.482854791 |
| Mtmr11 194126       | -1.010702147 | 0.490340785 | -1.702306718 | 0.071330792 |
| Arfrp1 76688        | -1.010749603 | 0.465990041 | -1.010749603 | 0.465990041 |
| Gfpt1 14583         | -1.010754202 | 0.486867317 | 1.108217012  | 0.350640912 |

|                   |              |             |              |             |
|-------------------|--------------|-------------|--------------|-------------|
| Snx3 54198        | -1.010837684 | 0.424786927 | 1.022789696  | 0.331579577 |
| Reps2 194590      | -1.010860351 | 0.490728802 | 1.372462499  | 0.184389685 |
| Nfatc3 18021      | -1.010942744 | 0.479416686 | 1.031701873  | 0.424961117 |
| 41159 235072      | -1.010977346 | 0.482275906 | 1.18415345   | 0.162441895 |
| Alg1 208211       | -1.010995208 | 0.433315221 | -1.053503304 | 0.186001788 |
| Taldo1 21351      | -1.011085288 | 0.4631845   | 1.11610248   | 0.139808752 |
| Klf3 16599        | -1.011091687 | 0.477146299 | -1.173993203 | 0.158472359 |
| Aven 74268        | -1.011092413 | 0.475603361 | -1.045606609 | 0.411736893 |
| D16H22S680E 27883 | -1.011137632 | 0.471746208 | 1.098621312  | 0.207998184 |
| Dffb 13368        | -1.011137852 | 0.48564645  | -1.011137852 | 0.48564645  |
| Txn1 53382        | -1.011168442 | 0.464829822 | -1.040378178 | 0.328966397 |
| Slc35b1 110172    | -1.011261066 | 0.476969655 | 1.122473778  | 0.259672076 |
| Zfp41 22701       | -1.011298127 | 0.491012579 | -1.012545531 | 0.488901211 |
| Irf2bp1 272359    | -1.011366562 | 0.465917502 | -1.011366562 | 0.465917502 |
| Slc17a2 218103    | -1.011426119 | 0.466629606 | -1.119183992 | 0.158174973 |
| Plcl2 224860      | -1.011431245 | 0.466587483 | 1.0640953    | 0.301651934 |
| Rab40c 224624     | -1.011460157 | 0.463890815 | 1.131556953  | 0.101257686 |
| Zfp644 52397      | -1.011473142 | 0.486345522 | -1.181606569 | 0.285317452 |
| Srfbp1 67222      | -1.011543527 | 0.466398561 | -1.011543527 | 0.466398561 |
| Aspscr1 68938     | -1.011551306 | 0.471621369 | 1.046041781  | 0.390580522 |
| Stx17 67727       | -1.011574175 | 0.469635313 | -1.011574175 | 0.469635313 |
| Gm4902 236451     | -1.011630684 | 0.486758837 | -1.011630684 | 0.486758837 |
| Mt1 17748         | -1.011645435 | 0.485953782 | 1.02881185   | 0.460829401 |
| Hsd17b7 15490     | -1.011653459 | 0.484431635 | -1.011653459 | 0.484431635 |
| Tspan4 64540      | -1.011670224 | 0.468998748 | 1.110014188  | 0.186350872 |
| Nol9 74035        | -1.011755953 | 0.404023893 | -1.040787845 | 0.173111105 |
| Fkbp9 27055       | -1.01175796  | 0.468687234 | -1.04495142  | 0.390633806 |
| Nfx1 74164        | -1.011807748 | 0.463324185 | -1.000492883 | 0.498017431 |
| Mrpl21 353242     | -1.011888964 | 0.462785883 | -1.072674757 | 0.29403014  |
| Eml3 225898       | -1.011893878 | 0.453283248 | -1.03250026  | 0.302971693 |
| Ggnbp2 217039     | -1.011941954 | 0.472172675 | -1.102164039 | 0.263336831 |
| Zfp275 27081      | -1.012013328 | 0.483943853 | -1.190344854 | 0.236617109 |
| Ins13 16336       | -1.012078886 | 0.49302935  | -2.019042817 | 0.167534604 |
| Tfap4 83383       | -1.012247587 | 0.469525516 | -1.005965192 | 0.48175261  |
| Tmem9b 56786      | -1.012306623 | 0.47802948  | -1.221233077 | 0.124904917 |
| Gstk1 76263       | -1.012316897 | 0.415854235 | 1.025141178  | 0.298354048 |
| C1d 57316         | -1.012324729 | 0.455088926 | -1.012324729 | 0.455088926 |
| Spata13 219140    | -1.012332674 | 0.477892227 | 1.124481784  | 0.181258025 |
| Psm11 69077       | -1.012351845 | 0.446164684 | 1.026670238  | 0.383245877 |
| Rps7 20115        | -1.012406672 | 0.468583534 | -1.204245291 | 0.06613148  |
| Impg2 224224      | -1.012461286 | 0.488263003 | -1.375225352 | 0.225993519 |
| Cxxc1 74322       | -1.012476915 | 0.446998324 | 1.04495688   | 0.302164719 |
| Acadl 11363       | -1.012530841 | 0.4618299   | 1.057571486  | 0.330368047 |
| Psm10 53380       | -1.012561445 | 0.470279478 | 1.097547789  | 0.274645469 |
| Il17rd 171463     | -1.012577145 | 0.490620378 | 1.641166232  | 0.156742294 |
| Abhd1 57742       | -1.012614634 | 0.48851706  | -1.012614634 | 0.48851706  |
| Pcbp1 23983       | -1.012618765 | 0.460840027 | -1.012618765 | 0.460840027 |
| Zfp575 101544     | -1.012753364 | 0.480269527 | -1.080854246 | 0.363312849 |
| Lrrk1 233328      | -1.01283419  | 0.47284884  | 1.076668999  | 0.335451393 |
| U2af1 108121      | -1.012934981 | 0.476337352 | -1.012934981 | 0.476337352 |
| Ccdc123 72140     | -1.012947772 | 0.471625414 | -1.012947772 | 0.471625414 |
| Zfp759 268670     | -1.012963073 | 0.487154047 | -1.205257318 | 0.300335651 |
| Brd2 14312        | -1.012970508 | 0.444140308 | -1.067772423 | 0.206431016 |



|                     |              |             |              |             |
|---------------------|--------------|-------------|--------------|-------------|
| Gdi1 14567          | -1.013046894 | 0.436835483 | -1.00343735  | 0.477931405 |
| Osbp18 237542       | -1.013172667 | 0.476762823 | 1.225888836  | 0.061643041 |
| Hunk 26559          | -1.013255419 | 0.482969702 | 1.425147735  | 0.063021599 |
| Map2k2 26396        | -1.013258331 | 0.47057996  | -1.112106215 | 0.277814314 |
| Sepp1 20363         | -1.013279145 | 0.447406578 | 1.028593921  | 0.391823304 |
| Rdh14 105014        | -1.013387644 | 0.474967253 | -1.277318642 | 0.072642727 |
| Tmcc1 330401        | -1.013389702 | 0.457655461 | 1.044081579  | 0.35869808  |
| Ilf3 16201          | -1.013447516 | 0.454782438 | 1.078536861  | 0.206380588 |
| Fkbp1 56299         | -1.013453705 | 0.481449649 | -1.219779263 | 0.241490525 |
| Sil1 81500          | -1.013454137 | 0.474672688 | -1.013454137 | 0.474672688 |
| Adcy4 104110        | -1.013459292 | 0.470017816 | -1.244664208 | 0.04676644  |
| Brwd3 382236        | -1.01348546  | 0.484017236 | 1.460486548  | 0.05979764  |
| Ftsj1 54632         | -1.01350826  | 0.436708369 | -1.047238516 | 0.300044646 |
| Pde9a 18585         | -1.013670537 | 0.460152573 | -1.111878863 | 0.189571792 |
| 1200014J11Rik 66874 | -1.013680696 | 0.468398414 | 1.128684786  | 0.185540899 |
| Rac1 19353          | -1.013689095 | 0.404354604 | -1.041771921 | 0.222798497 |
| 2310046K01Rik 69698 | -1.013693919 | 0.490677745 | -1.722583671 | 0.178732435 |
| Stk35 67333         | -1.013997551 | 0.467479977 | 1.026059939  | 0.443086131 |
| 4921524J17Rik 66714 | -1.014007703 | 0.482327315 | -1.501518454 | 0.0324447   |
| Ces1d 104158        | -1.014091084 | 0.464194493 | -1.211696577 | 0.055225605 |
| Atp2c1 235574       | -1.014113794 | 0.474304689 | 1.120152458  | 0.297132694 |
| Phb2 12034          | -1.014150996 | 0.428298976 | -1.042224913 | 0.307636692 |
| Lsm12 268490        | -1.014215253 | 0.462801055 | -1.014215253 | 0.462801055 |
| Etnk2 214253        | -1.014315724 | 0.43392061  | -1.038118393 | 0.305639334 |
| Pabpc4 230721       | -1.014349977 | 0.428497864 | 1.031909685  | 0.323921038 |
| Aim1 11630          | -1.014358561 | 0.474340988 | -1.099105496 | 0.332593106 |
| Gpr56 14766         | -1.014397923 | 0.468268044 | -1.248523124 | 0.045127837 |
| 1810019J16Rik 69073 | -1.014401365 | 0.45099923  | -1.014401365 | 0.45099923  |
| 2610027L16Rik 67842 | -1.014448559 | 0.427770249 | 1.003030951  | 0.479657866 |
| Chchd3 66075        | -1.014448899 | 0.441521888 | 1.043097236  | 0.321267852 |
| Ntng2 171171        | -1.014462835 | 0.493334813 | -1.722963636 | 0.273335094 |
| Chek2 50883         | -1.014496383 | 0.489544714 | -2.056027442 | 0.059523874 |
| Dbn1 56320          | -1.014515795 | 0.48263683  | -1.132796966 | 0.350466069 |
| Trit1 66966         | -1.014528272 | 0.466730083 | -1.033315103 | 0.375452876 |
| Tor2a 30933         | -1.014534734 | 0.449044015 | -1.081206809 | 0.236113906 |
| Cebpe 110794        | -1.014615898 | 0.476374771 | -1.002946627 | 0.494693598 |
| Arl10 56795         | -1.014633093 | 0.487425768 | 1.049882659  | 0.437044848 |
| Psmc3 22123         | -1.014641834 | 0.453589576 | -1.060533174 | 0.32912327  |
| Myh10 77579         | -1.014670007 | 0.481765953 | 1.233396622  | 0.24458571  |
| Psmb1 19170         | -1.014818899 | 0.453358142 | -1.180058068 | 0.028582581 |
| 41161 53860         | -1.014897399 | 0.431860503 | -1.004765894 | 0.470435298 |
| 4632415L05Rik 70808 | -1.014923466 | 0.469686531 | -1.014923466 | 0.469686531 |
| Amd1 11702          | -1.014927773 | 0.468462    | 1.069462241  | 0.36554785  |
| Pex1 71382          | -1.014983445 | 0.468209965 | 1.045967747  | 0.411916032 |
| Dhx57 106794        | -1.015005079 | 0.476381426 | -1.183973157 | 0.189943619 |
| Gck 103988          | -1.015029915 | 0.484475162 | -1.241606208 | 0.288608638 |
| Rbx1 56438          | -1.015167791 | 0.429248349 | -1.02287842  | 0.362436391 |
| Gabarap 56486       | -1.015255484 | 0.461977821 | -1.117320345 | 0.232308309 |
| Ovca2 246257        | -1.015280094 | 0.435037295 | -1.088207904 | 0.088682864 |
| Akirin1 68050       | -1.015288116 | 0.452967877 | -1.010297535 | 0.461362748 |
| Cd59b 333883        | -1.015396651 | 0.478602573 | 1.139310071  | 0.330291212 |
| Enpp3 209558        | -1.015418678 | 0.464785205 | -1.151501774 | 0.174579021 |
| Ssu72 68991         | -1.015485635 | 0.421048851 | -1.065404745 | 0.163043956 |

|                |              |             |              |             |
|----------------|--------------|-------------|--------------|-------------|
| Gm16517 110012 | -1.015543835 | 0.470016735 | -1.015543835 | 0.470016735 |
| Plbd2 71772    | -1.01554994  | 0.457085642 | -1.099280814 | 0.250377964 |
| Tfam 21780     | -1.01555586  | 0.456650648 | 1.064209729  | 0.325747969 |
| Slc27a5 26459  | -1.015764689 | 0.418349162 | -1.067371902 | 0.143102448 |
| Atp13a1 170759 | -1.015770134 | 0.424763259 | -1.015770134 | 0.424763259 |
| Ccdc142 243510 | -1.015912875 | 0.434845931 | -1.080259792 | 0.160962123 |
| Aip 11632      | -1.015915485 | 0.455687456 | -1.207549184 | 0.024152885 |
| Maf1 68877     | -1.015937632 | 0.460300874 | -1.015937632 | 0.460300874 |
| Ctnna1 12385   | -1.015977726 | 0.451456098 | 1.125353416  | 0.141448221 |
| Npy1r 18166    | -1.015986716 | 0.492263219 | -2.098176768 | 0.227724758 |
| Ilf2 67781     | -1.016083643 | 0.458375643 | -1.1990108   | 0.056818032 |
| Fam3a 66294    | -1.016120499 | 0.44848018  | -1.060825354 | 0.318729957 |
| Mtpap 67440    | -1.016169221 | 0.469422954 | 1.063331713  | 0.382603853 |
| Bysl 53414     | -1.016223913 | 0.443461886 | 1.063139893  | 0.234752158 |
| Timm44 21856   | -1.016289743 | 0.434522443 | 1.021156029  | 0.415553008 |
| Puf60 67959    | -1.016364662 | 0.418355411 | -1.048402773 | 0.282531247 |
| Arf3 11842     | -1.016373691 | 0.466113632 | 1.027721028  | 0.412778226 |
| Snw1 66354     | -1.016385322 | 0.428304239 | -1.072512607 | 0.202700872 |
| Crem 12916     | -1.016387365 | 0.473953622 | -1.340753796 | 0.076745199 |
| Pld2 18806     | -1.016416704 | 0.474890679 | -1.210839036 | 0.188944119 |
| Efha1 68514    | -1.016454764 | 0.417737305 | -1.11238006  | 0.037518934 |
| Galnt14 71685  | -1.016474095 | 0.491610936 | -1.750086636 | 0.276292757 |
| Ptgds 19215    | -1.016475262 | 0.484900046 | -1.016475262 | 0.484900046 |
| Ndufa7 66416   | -1.01648804  | 0.45573259  | -1.200379663 | 0.052900578 |
| Oplah 75475    | -1.016506243 | 0.399882909 | -1.021915469 | 0.293075777 |
| Dhx37 208144   | -1.016535922 | 0.464015783 | -1.116006394 | 0.275979529 |
| Cdc37 12539    | -1.016548695 | 0.467918356 | -1.014912962 | 0.46137081  |
| Tmem222 52174  | -1.016556404 | 0.463250024 | -1.09915089  | 0.306207986 |
| Gnpat 14712    | -1.016585078 | 0.427223074 | -1.072437747 | 0.202405174 |
| Miip 28010     | -1.016652706 | 0.45880521  | 1.068694842  | 0.33785042  |
| Itrip 414801   | -1.016835285 | 0.475761984 | -1.440364137 | 0.022395959 |
| Uqcc 56046     | -1.016880499 | 0.407937    | -1.061501212 | 0.186030105 |
| Wdr74 107071   | -1.016913477 | 0.457019588 | -1.016913477 | 0.457019588 |
| Osbpl9 100273  | -1.016997357 | 0.423528894 | -1.048544534 | 0.297918709 |
| Sema4b 20352   | -1.017073415 | 0.453493895 | -1.017073415 | 0.453493895 |
| Cchr1 240084   | -1.017076273 | 0.479141015 | 1.281738778  | 0.187172756 |
| Aga 11593      | -1.017077579 | 0.447887608 | 1.127312955  | 0.130688684 |
| Yipf4 67864    | -1.017085053 | 0.460939017 | 1.096654103  | 0.282371617 |
| Lrrc8a 241296  | -1.01713364  | 0.447985291 | -1.115855365 | 0.163502237 |
| Ankfy1 11736   | -1.017182518 | 0.466655192 | 1.242442593  | 0.078035127 |
| Adam23 23792   | -1.017222936 | 0.462914574 | 1.056033686  | 0.389614636 |
| Tmub2 72053    | -1.017250255 | 0.416641964 | 1.005783185  | 0.473625778 |
| C1qc 12262     | -1.017252378 | 0.45699747  | -1.144003493 | 0.158812618 |
| Sars 20226     | -1.017460537 | 0.442874267 | -1.077895645 | 0.26988268  |
| Ctr9 22083     | -1.017508647 | 0.449024999 | 1.065135546  | 0.288477475 |
| Il1rap 16180   | -1.017586978 | 0.460606223 | -1.017586978 | 0.460606223 |
| Casp9 12371    | -1.017592248 | 0.456729312 | -1.017592248 | 0.456729312 |
| Bcl7b 12054    | -1.017599161 | 0.440710257 | -1.096295309 | 0.163045245 |
| Dot1l 208266   | -1.017613234 | 0.476640291 | 1.056557752  | 0.404781714 |
| Mrpl27 94064   | -1.017616763 | 0.430658997 | -1.054513251 | 0.308433611 |
| Fahd1 68636    | -1.017786516 | 0.456822252 | -1.076796583 | 0.156163184 |
| Aplp1 11803    | -1.017790247 | 0.490679887 | -1.238100091 | 0.415076597 |
| Trim24 21848   | -1.017859442 | 0.461590776 | -1.13896577  | 0.18631951  |

|                      |              |             |              |             |
|----------------------|--------------|-------------|--------------|-------------|
| Snurf 84704          | -1.017972742 | 0.487159005 | -1.017972742 | 0.487159005 |
| Psd4 215632          | -1.017984988 | 0.464195902 | -1.033978063 | 0.399096328 |
| Prss8 76560          | -1.018055057 | 0.483379467 | -1.436967838 | 0.191906697 |
| Rgs1 50778           | -1.018099729 | 0.486600934 | -1.018099729 | 0.486600934 |
| S100a16 67860        | -1.018122074 | 0.470598031 | -1.118246988 | 0.23887655  |
| Napepld 242864       | -1.018192992 | 0.490400583 | -1.571790977 | 0.158746995 |
| Arhgef26 622434      | -1.018232715 | 0.459367007 | -1.232870483 | 0.080369388 |
| Fars2 69955          | -1.018264583 | 0.461443518 | 1.047541375  | 0.355101916 |
| Mdp1 67881           | -1.018294484 | 0.460185619 | -1.133194777 | 0.20025742  |
| Acp1 11431           | -1.018326131 | 0.413009277 | -1.010126093 | 0.422332551 |
| Nif3l1 65102         | -1.018377676 | 0.449455532 | -1.134807836 | 0.143696638 |
| Mtmr4 170749         | -1.01841746  | 0.453358192 | -1.01841746  | 0.453358192 |
| Uhrf1bp1 75089       | -1.018511651 | 0.457099995 | 1.054722811  | 0.372393401 |
| Degs1 13244          | -1.018517325 | 0.433321781 | 1.062715508  | 0.245723487 |
| Polr2j 20022         | -1.018544277 | 0.462435805 | 1.128120726  | 0.239339535 |
| Zswim5 74464         | -1.018854065 | 0.484475875 | 1.911973184  | 0.00861303  |
| Elof1 66126          | -1.018957795 | 0.467432613 | -1.006310242 | 0.484193251 |
| Slc4a2 20535         | -1.019032791 | 0.317550544 | -1.019032791 | 0.317550544 |
| Cyhr1 54151          | -1.019039236 | 0.440804527 | -1.099182908 | 0.215886249 |
| Ufm1 67890           | -1.019100852 | 0.433652981 | 1.057110159  | 0.287657899 |
| Tmed3 66111          | -1.019116794 | 0.467280211 | 1.156097836  | 0.241217187 |
| Nt5dc3 103466        | -1.019120915 | 0.461049725 | -1.019120915 | 0.461049725 |
| Arrdc2 70807         | -1.019138834 | 0.475144162 | -1.019138834 | 0.475144162 |
| Scp2 20280           | -1.019155825 | 0.432652535 | -1.154471539 | 0.054275603 |
| Slc35b2 73836        | -1.019174686 | 0.406965635 | -1.019174686 | 0.406965635 |
| Lcorl 209707         | -1.019209648 | 0.490846068 | -1.162032469 | 0.433589133 |
| Brc3 210766          | -1.019292389 | 0.46885037  | -1.232332043 | 0.163227775 |
| C230096C10Rik 230866 | -1.019304824 | 0.456971917 | -1.16418641  | 0.156888728 |
| Ulk3 71742           | -1.01936618  | 0.462430927 | -1.274968752 | 0.072231961 |
| Dst 13518            | -1.019423187 | 0.425181402 | 1.106807972  | 0.067949743 |
| Ppp2r1b 73699        | -1.019471027 | 0.458592069 | -1.038299953 | 0.369585078 |
| Fastk 66587          | -1.019533641 | 0.398032218 | -1.019533641 | 0.398032218 |
| Serinc5 218442       | -1.019582587 | 0.482127474 | 1.479551381  | 0.137271807 |
| Zfp329 67230         | -1.019615262 | 0.479803571 | -1.219391763 | 0.275616332 |
| Ikzf5 67143          | -1.019642888 | 0.476541547 | -1.019642888 | 0.476541547 |
| Arhgef25 52666       | -1.019673461 | 0.475833314 | 1.1731677    | 0.268103729 |
| F2 14061             | -1.01968402  | 0.430066877 | -1.157615591 | 0.015133252 |
| 1500011H22Rik 68948  | -1.01969598  | 0.475443605 | 1.012060357  | 0.475150693 |
| C130036L24Rik 319336 | -1.019839084 | 0.480998591 | -1.41624733  | 0.190406543 |
| Cdk6 12571           | -1.019849315 | 0.478774524 | 1.19550285   | 0.324427888 |
| Ctdsp2 52468         | -1.019860158 | 0.401033091 | -1.082078996 | 0.103393156 |
| Galk1 14635          | -1.019893628 | 0.460426658 | -1.08875349  | 0.258909151 |
| Spnb3 20743          | -1.019948706 | 0.415716107 | -1.019948706 | 0.415716107 |
| Smarcb1 20587        | -1.019995159 | 0.437402138 | -1.168620049 | 0.066757765 |
| Fam89b 17826         | -1.020091228 | 0.438274556 | -1.020091228 | 0.438274556 |
| Top1 21969           | -1.020171427 | 0.46966798  | 1.358948711  | 0.028971237 |
| Tgs1 116940          | -1.020268447 | 0.458131851 | 1.131362384  | 0.218893067 |
| Trip6 22051          | -1.020340923 | 0.43035838  | 1.050861065  | 0.301028654 |
| Spred1 114715        | -1.02034746  | 0.484976865 | -1.365186658 | 0.303152818 |
| Pitpnm2 19679        | -1.020508612 | 0.432976129 | -1.180191325 | 0.02300071  |
| Txndc12 66073        | -1.020545261 | 0.436688825 | -1.025843726 | 0.394070862 |
| Clec4a2 26888        | -1.020608257 | 0.483173358 | -1.398609928 | 0.259634157 |
| Sh3bgrl3 73723       | -1.020716537 | 0.463491792 | -1.068223706 | 0.33636104  |

|                      |              |             |              |             |
|----------------------|--------------|-------------|--------------|-------------|
| Dnajc17 69408        | -1.020753602 | 0.462162691 | -1.020753602 | 0.462162691 |
| Use1 67023           | -1.020754669 | 0.458151751 | -1.166265815 | 0.196446585 |
| Mosc1 66112          | -1.020785253 | 0.419903587 | -1.083048125 | 0.181760837 |
| 4930455F23Rik 74895  | -1.020811367 | 0.459409764 | -1.009066516 | 0.472224094 |
| Wdr1 22388           | -1.020812538 | 0.39709317  | -1.020812538 | 0.39709317  |
| Eppk1 223650         | -1.020826318 | 0.452657155 | -1.082501256 | 0.27403136  |
| BC003965 214489      | -1.020874349 | 0.441300987 | -1.099425612 | 0.223704719 |
| Tshz1 110796         | -1.020897108 | 0.465423657 | 1.274984938  | 0.101135534 |
| Pank1 75735          | -1.020953357 | 0.463290262 | 1.103517952  | 0.33263809  |
| B230312A22Rik 230088 | -1.021020913 | 0.441339228 | -1.015044179 | 0.424927294 |
| Tmco1 68944          | -1.021042238 | 0.45088885  | 1.180066089  | 0.107823898 |
| Raly 19383           | -1.021053564 | 0.451687489 | -1.146177349 | 0.192716249 |
| Polm 54125           | -1.021078539 | 0.46045302  | -1.109392497 | 0.265797587 |
| Nek5 330721          | -1.021082443 | 0.487944114 | 1.952283016  | 0.177025661 |
| Ak2 11637            | -1.02109502  | 0.374968646 | -1.02109502  | 0.374968646 |
| Vps18 228545         | -1.021113069 | 0.401464174 | -1.021113069 | 0.401464174 |
| Gm14326 665211       | -1.021141524 | 0.475223023 | -1.254907086 | 0.255777601 |
| Sra1 24068           | -1.021155494 | 0.438961841 | -1.021155494 | 0.438961841 |
| Mrpl50 28028         | -1.02120169  | 0.413748741 | -1.058473058 | 0.279443365 |
| Ddx50 94213          | -1.021204765 | 0.397311581 | 1.01561529   | 0.384727216 |
| Znrf2 387524         | -1.021239472 | 0.472413125 | 1.289029077  | 0.133323618 |
| Pdrg1 68559          | -1.021496025 | 0.449095217 | 1.070419158  | 0.320098528 |
| Xab2 67439           | -1.021658756 | 0.425740919 | 1.009679122  | 0.461047905 |
| Cpsf2 51786          | -1.021720175 | 0.46005523  | 1.091874929  | 0.321182031 |
| Sbno2 216161         | -1.021756769 | 0.443648649 | -1.078685103 | 0.320852258 |
| Mamdc4 381352        | -1.021810856 | 0.483479225 | 1.804995212  | 0.044653072 |
| Donson 60364         | -1.021835953 | 0.484930508 | -1.021835953 | 0.484930508 |
| Tax1bp1 52440        | -1.021836694 | 0.454134384 | 1.205625463  | 0.102565219 |
| Ugt2b5 22238         | -1.021872986 | 0.426191673 | -1.021872986 | 0.426191673 |
| Lrrc57 66606         | -1.021887358 | 0.462426658 | 1.134536912  | 0.093054222 |
| Thoc3 73666          | -1.021919936 | 0.420351783 | -1.167550495 | 0.014052069 |
| Nde1 67203           | -1.021939035 | 0.456470232 | -1.167041574 | 0.201959982 |
| Mapre2 212307        | -1.02194946  | 0.44649216  | -1.203935982 | 0.098254726 |
| Tmem33 67878         | -1.021968372 | 0.442481353 | 1.069114581  | 0.31888893  |
| Suv420h1 225888      | -1.021988831 | 0.449054011 | -1.11623551  | 0.261093463 |
| Stk38 106504         | -1.022083975 | 0.4180268   | 1.027799983  | 0.397736677 |
| Actr8 56249          | -1.022137184 | 0.434144277 | -1.078186767 | 0.280910752 |
| Rg9mtd1 52575        | -1.022253282 | 0.439131135 | -1.022253282 | 0.439131135 |
| Maff 17133           | -1.022273748 | 0.475096288 | -1.022273748 | 0.475096288 |
| Zfp653 319601        | -1.022334371 | 0.456695926 | -1.11653216  | 0.282746087 |
| Mrpl37 56280         | -1.022399457 | 0.399382629 | -1.123287753 | 0.053243855 |
| Tpst2 22022          | -1.022453467 | 0.424169088 | 1.05374961   | 0.28482476  |
| Ticam1 106759        | -1.022571162 | 0.437240479 | 1.07748035   | 0.270405278 |
| Pemt 18618           | -1.022668429 | 0.454661337 | -1.019999524 | 0.44439405  |
| Vps37c 107305        | -1.022785211 | 0.415150467 | -1.005549551 | 0.473427529 |
| 1500032L24Rik 69029  | -1.02282793  | 0.44721519  | 1.078691312  | 0.321574019 |
| Cdk14 18647          | -1.022858744 | 0.486127657 | -1.222242267 | 0.387350903 |
| Pfkip 56421          | -1.022869784 | 0.472128391 | -1.223250592 | 0.218417019 |
| Rab4b 19342          | -1.022896665 | 0.451796533 | -1.010003115 | 0.465380264 |
| Lrrc16a 68732        | -1.022897172 | 0.481270207 | 1.579749624  | 0.018881243 |
| Med11 66172          | -1.022907689 | 0.463294202 | 1.120899178  | 0.288313183 |
| Tox2 269389          | -1.022920113 | 0.485844779 | -1.155542448 | 0.390624835 |
| Cfhr2 545366         | -1.022941961 | 0.445385343 | -1.061679415 | 0.330639894 |

|                      |              |             |              |             |
|----------------------|--------------|-------------|--------------|-------------|
| Zfp53 24132          | -1.022950658 | 0.475869636 | -1.409805934 | 0.153102385 |
| Rcor2 104383         | -1.022972993 | 0.486864591 | 1.943674352  | 0.178354219 |
| Faf1 14084           | -1.022994951 | 0.424349683 | -1.08232729  | 0.240619774 |
| Slc30a1 22782        | -1.022995755 | 0.446248897 | 1.089175495  | 0.289301889 |
| Tm9sf3 107358        | -1.023025486 | 0.424199587 | -1.023025486 | 0.424199587 |
| Zfp747 269997        | -1.023112924 | 0.45194652  | -1.023112924 | 0.45194652  |
| Zfp335 329559        | -1.023173256 | 0.456689334 | -1.263450293 | 0.092015465 |
| Tex264 21767         | -1.023192874 | 0.43379411  | -1.096881309 | 0.252565807 |
| Steap3 68428         | -1.023216552 | 0.429820245 | -1.023216552 | 0.429820245 |
| Gsn 227753           | -1.023256848 | 0.466796614 | 1.221628356  | 0.192114475 |
| Gm6724 626954        | -1.023262755 | 0.476265398 | -1.412183243 | 0.165951165 |
| Brf2 66653           | -1.023284331 | 0.460873044 | 1.092655014  | 0.338072811 |
| Ptbp1 19205          | -1.023298521 | 0.420500896 | 1.099291151  | 0.158193275 |
| Rhot2 214952         | -1.023304346 | 0.424662487 | -1.181643916 | 0.021229183 |
| Sar1a 20224          | -1.023336644 | 0.375846168 | -1.011937145 | 0.441106539 |
| Pgd 110208           | -1.023337115 | 0.410220299 | -1.023337115 | 0.410220299 |
| Bhlhe40 20893        | -1.023359766 | 0.460703157 | -1.068900017 | 0.345772027 |
| Eif3a 13669          | -1.023404091 | 0.443520072 | 1.106994531  | 0.216850191 |
| Ghitm 66092          | -1.023455871 | 0.4282928   | -1.023455871 | 0.4282928   |
| 1200016B10Rik 66875  | -1.023551389 | 0.466444411 | 1.170628217  | 0.210472654 |
| Cog7 233824          | -1.02370752  | 0.37824227  | -1.070837648 | 0.147167555 |
| Cinp 67236           | -1.023760101 | 0.427829415 | -1.023760101 | 0.427829415 |
| Aph1a 226548         | -1.023764647 | 0.31786268  | -1.001368187 | 0.488637262 |
| Fam168b 214469       | -1.023860337 | 0.460340969 | 1.300733209  | 0.042922351 |
| Chchd10 103172       | -1.023940611 | 0.440888105 | 1.057030912  | 0.350873067 |
| Gm98 225908          | -1.023941101 | 0.440853007 | 1.086256157  | 0.067162919 |
| Agap3 213990         | -1.023976169 | 0.374721412 | -1.023976169 | 0.374721412 |
| Ckif 75458           | -1.024059082 | 0.481921016 | 1.242318118  | 0.311822675 |
| Lars2 102436         | -1.024114226 | 0.468992557 | -1.093691478 | 0.338781811 |
| Rarres2 71660        | -1.024222344 | 0.460412156 | -1.254729475 | 0.121785472 |
| Scarb2 12492         | -1.024225849 | 0.355870037 | 1.024349864  | 0.310122594 |
| Dusp11 72102         | -1.02433203  | 0.43115359  | 1.017105831  | 0.429232476 |
| Pfas 237823          | -1.024372552 | 0.458593044 | 1.241307487  | 0.142184586 |
| Wdr4 57773           | -1.024381547 | 0.400364101 | -1.136770683 | 0.047349848 |
| Echs1 93747          | -1.024393699 | 0.271643018 | -1.053363228 | 0.059945523 |
| Gabarapl1 57436      | -1.024395513 | 0.433631697 | -1.218154809 | 0.026686731 |
| Polr2m 28015         | -1.024431358 | 0.389462762 | -1.024431358 | 0.389462762 |
| Ccdc124 234388       | -1.02444311  | 0.458482157 | -1.02444311  | 0.458482157 |
| Rnaseh1 19819        | -1.024458845 | 0.454910831 | -1.060177424 | 0.24777572  |
| 6530401N04Rik 328092 | -1.024497271 | 0.420151383 | 1.050830284  | 0.307391746 |
| Lima1 65970          | -1.024576411 | 0.434219892 | 1.101068268  | 0.179385293 |
| Wipi2 74781          | -1.024647217 | 0.379378233 | -1.087452362 | 0.09488452  |
| Fetub 59083          | -1.024749394 | 0.449997632 | -1.2814143   | 0.04744876  |
| Tmem66 67887         | -1.024815705 | 0.380788613 | -1.01767564  | 0.345376272 |
| Rufy2 70432          | -1.024819518 | 0.467318133 | 1.171045855  | 0.298148569 |
| Snx32 225861         | -1.024833567 | 0.467205913 | -1.161807328 | 0.248149814 |
| Spsb3 79043          | -1.02488946  | 0.431944771 | -1.21188211  | 0.034328386 |
| Asxl2 75302          | -1.024971472 | 0.470211959 | -1.024971472 | 0.470211959 |
| Zap70 22637          | -1.025045435 | 0.449224075 | 1.08193598   | 0.320242993 |
| P2ry2 18442          | -1.025076866 | 0.436479599 | -1.088548039 | 0.289374406 |
| Tubgcp6 328580       | -1.025153257 | 0.437197261 | -1.025153257 | 0.437197261 |
| Ddt 13202            | -1.025184272 | 0.443924324 | -1.025184272 | 0.443924324 |
| Akap13 75547         | -1.025204072 | 0.463262035 | 1.229518774  | 0.161757762 |

|                      |              |             |              |             |
|----------------------|--------------|-------------|--------------|-------------|
| Hnrnpa1 15382        | -1.025274729 | 0.453503481 | -1.321820741 | 0.039671829 |
| Snapc2 102209        | -1.025275224 | 0.438271553 | -1.214871793 | 0.076189296 |
| Gimap3 83408         | -1.025483879 | 0.446254034 | -1.073467369 | 0.256997134 |
| Fam108a 216169       | -1.025485887 | 0.430785293 | -1.11657214  | 0.180384626 |
| Ssr4 20832           | -1.025528467 | 0.42503235  | -1.192910663 | 0.044178416 |
| Dyrk2 69181          | -1.025744412 | 0.46045835  | -1.025744412 | 0.46045835  |
| Mvp 78388            | -1.025757795 | 0.434932873 | -1.107330259 | 0.260059729 |
| Zranb1 360216        | -1.025782912 | 0.435764941 | -1.025782912 | 0.435764941 |
| Cox19 68033          | -1.025795169 | 0.440474847 | 1.061208403  | 0.349880012 |
| Mkrn1 54484          | -1.025820305 | 0.421133637 | -1.115916614 | 0.133706944 |
| Sap18 20220          | -1.025852973 | 0.359795874 | -1.067299992 | 0.170666192 |
| Camk1 52163          | -1.025856211 | 0.464082787 | 1.165518735  | 0.132035249 |
| Xcr1 23832           | -1.025862323 | 0.476875322 | 1.156502255  | 0.360111999 |
| Al182371 98870       | -1.025874005 | 0.45105146  | -1.230382019 | 0.090995833 |
| 1110001A16Rik 68554  | -1.025894119 | 0.408263708 | -1.025894119 | 0.408263708 |
| Trpc2 22064          | -1.025946932 | 0.46429671  | 1.088914164  | 0.391809288 |
| Casc4 319996         | -1.026005674 | 0.468578961 | -1.235303892 | 0.17649846  |
| 1810035L17Rik 380773 | -1.026013479 | 0.422517651 | -1.117786707 | 0.177697011 |
| Ado 211488           | -1.02605601  | 0.431388696 | -1.086087267 | 0.287851015 |
| Dcaf8 98193          | -1.026139944 | 0.339175093 | -1.00385023  | 0.476307197 |
| Rpl3 27367           | -1.026156655 | 0.398757622 | -1.072524577 | 0.236945873 |
| Xpr1 19775           | -1.026169173 | 0.371309195 | -1.127800883 | 0.013166808 |
| Cdc27 217232         | -1.026204382 | 0.44369607  | -1.065503369 | 0.287157246 |
| Smc4 70099           | -1.026239144 | 0.477461788 | 1.372784993  | 0.244803193 |
| Ndufaf4 68493        | -1.026321452 | 0.423279994 | -1.191035221 | 0.052199678 |
| D17Wsu104e 28106     | -1.026437497 | 0.441355972 | -1.159821313 | 0.177979161 |
| 2310011J03Rik 66374  | -1.026541176 | 0.434817732 | -1.026541176 | 0.434817732 |
| Ndr3 29812           | -1.026566503 | 0.397207721 | -1.141852473 | 0.034289169 |
| Ube2r2 67615         | -1.026643987 | 0.418676382 | -1.108901871 | 0.19818703  |
| Tmbim4 68212         | -1.02666324  | 0.39794231  | 1.04758481   | 0.285357953 |
| Napg 108123          | -1.02668644  | 0.438121195 | 1.055255559  | 0.365525882 |
| 4933409K07Rik 108816 | -1.026719153 | 0.42747174  | 1.008409074  | 0.468922121 |
| Slc39a11 69806       | -1.026723203 | 0.454761319 | 1.066316319  | 0.387335525 |
| Yipf3 28064          | -1.026751057 | 0.413251007 | -1.08168925  | 0.265198557 |
| Mup2 17841           | -1.026785767 | 0.487407397 | 1.389511645  | 0.345619417 |
| Gspt1 14852          | -1.026869703 | 0.414840272 | -1.08802091  | 0.234258572 |
| Eno1 13806           | -1.027020217 | 0.424252597 | 1.028587052  | 0.395536234 |
| Brca1 12189          | -1.027042766 | 0.478344744 | -1.395031364 | 0.267461448 |
| Etf1 110842          | -1.027077689 | 0.359973787 | -1.062448047 | 0.20138294  |
| Cep135 381644        | -1.027095911 | 0.466334622 | -1.121934465 | 0.348318824 |
| Szt2 230676          | -1.027100903 | 0.396530208 | -1.037808597 | 0.306505645 |
| Nup93 71805          | -1.027179304 | 0.474419942 | -1.620813531 | 0.047724049 |
| Trim32 69807         | -1.027185058 | 0.455365855 | 1.087624303  | 0.326449396 |
| BC029722 613262      | -1.027273295 | 0.418470156 | -1.191576493 | 0.035126964 |
| Fxc1 14356           | -1.027421424 | 0.440497474 | -1.032057058 | 0.422982447 |
| Chordc1 66917        | -1.027439432 | 0.42197946  | -1.202888052 | 0.037427894 |
| Fyb 23880            | -1.027485813 | 0.438572325 | -1.186059528 | 0.109370386 |
| Strap 20901          | -1.027498173 | 0.395372108 | -1.027498173 | 0.395372108 |
| Art4 109978          | -1.027507105 | 0.457168927 | -1.027507105 | 0.457168927 |
| Nol6 230082          | -1.02750789  | 0.36215875  | 1.008789691  | 0.454209061 |
| Gm4787 214321        | -1.027531427 | 0.489365619 | 3.3          | 0.173296754 |
| Rtn3 20168           | -1.027540144 | 0.392518941 | -1.093399221 | 0.138350188 |
| Tmem60 212090        | -1.027627723 | 0.463768634 | 1.344520376  | 0.114338795 |

|                      |              |             |              |             |
|----------------------|--------------|-------------|--------------|-------------|
| Daglb 231871         | -1.027695165 | 0.436708814 | -1.119693372 | 0.233090168 |
| BC003266 80284       | -1.027707912 | 0.407066028 | 1.10378487   | 0.139181588 |
| Commd10 69456        | -1.027756646 | 0.443558579 | -1.195748993 | 0.13387159  |
| Parl 381038          | -1.027927955 | 0.426313642 | -1.102394752 | 0.240779941 |
| Lrsam1 227738        | -1.027936709 | 0.445056682 | -1.117729945 | 0.136759456 |
| Mrpl10 107732        | -1.027989394 | 0.382526196 | 1.047448558  | 0.234370294 |
| Abcf1 224742         | -1.028017707 | 0.358178866 | 1.017442879  | 0.400646284 |
| Faah 14073           | -1.028051532 | 0.236528035 | -1.048984204 | 0.103224902 |
| Nhej1 75570          | -1.028106701 | 0.458239311 | -1.223238202 | 0.216726869 |
| Ugt2b36 231396       | -1.028111988 | 0.398657958 | 1.032640664  | 0.376711409 |
| Ubr5 70790           | -1.028117747 | 0.453934588 | 1.187328402  | 0.178261958 |
| 0610007C21Rik 381629 | -1.028119236 | 0.388334074 | -1.103350028 | 0.078072435 |
| Fzr1 56371           | -1.028162442 | 0.414517172 | -1.012182784 | 0.451598235 |
| Lztr1 66863          | -1.028172112 | 0.38624504  | 1.075430607  | 0.17914454  |
| Cd163 93671          | -1.028246195 | 0.444287845 | -1.028246195 | 0.444287845 |
| Prkcd 18753          | -1.028319242 | 0.460574887 | 1.220118524  | 0.200448835 |
| Hnrnpd 11991         | -1.028353123 | 0.440492037 | -1.027084359 | 0.412390044 |
| Ech1 51798           | -1.028360426 | 0.406985632 | -1.028360426 | 0.406985632 |
| Taz 66826            | -1.028377606 | 0.439139882 | -1.028377606 | 0.439139882 |
| Bmp5 12160           | -1.028391642 | 0.480059299 | -1.195149504 | 0.36511007  |
| Fggy 75578           | -1.028543283 | 0.394110153 | -1.087106477 | 0.189793574 |
| Ptprs 19280          | -1.028565448 | 0.456158438 | -1.24885965  | 0.166571798 |
| Fbxo18 50755         | -1.028640152 | 0.423073501 | -1.028640152 | 0.423073501 |
| Rheb 19744           | -1.028656633 | 0.439703183 | 1.063103913  | 0.373736081 |
| Nans 94181           | -1.02868178  | 0.447681659 | -1.089530479 | 0.294539627 |
| D630045J12Rik 330286 | -1.028682357 | 0.443392598 | -1.280994931 | 0.063760424 |
| Zc3hc1 232679        | -1.028686121 | 0.45047247  | -1.028686121 | 0.45047247  |
| Gatad1 67210         | -1.028773581 | 0.377358114 | 1.08349187   | 0.081720442 |
| Poldip3 73826        | -1.028824953 | 0.375089552 | -1.069927419 | 0.218837808 |
| Kctd6 71393          | -1.028925821 | 0.453294754 | -1.333452714 | 0.073264846 |
| Uap1 107652          | -1.028945215 | 0.440586087 | 1.221911503  | 0.061336936 |
| Fem1b 14155          | -1.028969611 | 0.433589253 | -1.149930553 | 0.191036166 |
| Smarce1 57376        | -1.028992349 | 0.430957801 | -1.028992349 | 0.430957801 |
| Sbno1 243272         | -1.02906294  | 0.445088415 | 1.019899706  | 0.441550414 |
| Alg8 381903          | -1.029078225 | 0.468824571 | -1.029078225 | 0.468824571 |
| Park7 57320          | -1.02909878  | 0.359270242 | -1.077336795 | 0.143848136 |
| Ccdc94 72886         | -1.029110535 | 0.429680879 | -1.041278477 | 0.37815575  |
| Sumf1 58911          | -1.029228495 | 0.41425627  | 1.04589258   | 0.362378386 |
| Ppil6 73075          | -1.029241268 | 0.483386241 | -1.130783055 | 0.437947892 |
| 1110059E24Rik 66206  | -1.029287774 | 0.417675944 | -1.095469934 | 0.245498602 |
| 2510049J12Rik 70291  | -1.029295826 | 0.413483732 | 1.118981281  | 0.136594799 |
| E2f4 104394          | -1.029308916 | 0.342014788 | -1.008195411 | 0.434487176 |
| Sash1 70097          | -1.029328763 | 0.462819226 | 1.244504393  | 0.20660387  |
| Fam32a 67922         | -1.029470634 | 0.409754259 | -1.085689165 | 0.268740152 |
| Ctbp1 13016          | -1.029483917 | 0.302446317 | -1.029483917 | 0.302446317 |
| Pomgnt1 68273        | -1.02949225  | 0.43880995  | -1.146732357 | 0.232547775 |
| Glrx2 69367          | -1.029574906 | 0.401881266 | 1.026509516  | 0.406180332 |
| Scaf4 224432         | -1.029715605 | 0.429875486 | -1.13378879  | 0.219569212 |
| Acin1 56215          | -1.029744837 | 0.395349896 | -1.091649242 | 0.190132445 |
| Brwd1 93871          | -1.029888329 | 0.42625158  | -1.029888329 | 0.42625158  |
| Txndc15 69672        | -1.029950833 | 0.371364524 | -1.029950833 | 0.371364524 |
| Fbxo22 71999         | -1.030048752 | 0.396163778 | 1.008577723  | 0.470238807 |
| Ctif 269037          | -1.030193732 | 0.443896172 | 1.078367033  | 0.362778109 |

|                      |              |             |              |             |
|----------------------|--------------|-------------|--------------|-------------|
| Atp5c1 11949         | -1.030248735 | 0.327055518 | -1.109562491 | 0.025998168 |
| Pik3r4 75669         | -1.030288213 | 0.431369499 | 1.037188021  | 0.420672721 |
| E130309D02Rik 231868 | -1.030306016 | 0.403184013 | 1.01281308   | 0.45881409  |
| Pvrl2 19294          | -1.030307917 | 0.421499026 | -1.134524073 | 0.185654757 |
| Ssbp3 72475          | -1.030376763 | 0.318346291 | -1.024366853 | 0.268818982 |
| Sgms1 208449         | -1.030467653 | 0.409408464 | 1.128102721  | 0.102162544 |
| Atp9a 11981          | -1.030483296 | 0.346841074 | -1.028826453 | 0.368773186 |
| Mrps12 24030         | -1.030498331 | 0.399508758 | 1.039067994  | 0.351812829 |
| Tagln2 21346         | -1.030500348 | 0.42379454  | -1.046631773 | 0.330190776 |
| Hexim1 192231        | -1.030529299 | 0.358499796 | -1.030529299 | 0.358499796 |
| Socs3 12702          | -1.030531467 | 0.455867643 | -1.20227483  | 0.253910544 |
| Pabpc1 18458         | -1.030532193 | 0.397750459 | -1.106681752 | 0.144849513 |
| Atp5j2 57423         | -1.030538464 | 0.440188403 | -1.286345012 | 0.063577906 |
| Dynlt1e 100040631    | -1.030601934 | 0.477194093 | 1.400578006  | 0.274137403 |
| Sp1 20683            | -1.030657002 | 0.447616876 | 1.242219336  | 0.125344351 |
| Pik3c2g 18705        | -1.030711041 | 0.46456532  | 1.133099751  | 0.366688948 |
| Polr3a 218832        | -1.030722447 | 0.435467184 | -1.030722447 | 0.435467184 |
| Leo1 235497          | -1.030806111 | 0.405081321 | -1.028971963 | 0.370067864 |
| Rc3h1 381305         | -1.030881404 | 0.449871788 | 1.077239373  | 0.269580866 |
| Elmod3 232089        | -1.03096652  | 0.396227618 | -1.03096652  | 0.396227618 |
| Rnf103 22644         | -1.030968052 | 0.420135681 | 1.14416333   | 0.130789751 |
| Eif5b 226982         | -1.031032049 | 0.410989411 | 1.025118939  | 0.425806112 |
| Cox6c 12864          | -1.031130309 | 0.408549394 | -1.187884432 | 0.06058346  |
| Afg3l2 69597         | -1.031169104 | 0.35622769  | 1.010872446  | 0.444337535 |
| Eftud2 20624         | -1.031177591 | 0.384866983 | 1.034662185  | 0.358486083 |
| Fam98b 68215         | -1.031216094 | 0.461881709 | -1.246642251 | 0.253488914 |
| CommD5 66398         | -1.031218842 | 0.41316252  | -1.095535064 | 0.249663049 |
| Qsox2 227638         | -1.031276623 | 0.452185157 | -1.364543504 | 0.05206433  |
| Ccdc24 381546        | -1.031328291 | 0.459286888 | -1.289318515 | 0.185086587 |
| H2-Gs10 436493       | -1.031333957 | 0.432746462 | 1.203989993  | 0.070746718 |
| Fam110a 73847        | -1.031349502 | 0.423840782 | -1.031349502 | 0.423840782 |
| Ykt6 56418           | -1.031359076 | 0.33556237  | -1.082131655 | 0.08813628  |
| Apon 28194           | -1.031364675 | 0.389592114 | 1.016339329  | 0.417391142 |
| BC028528 229600      | -1.031366117 | 0.476289634 | 1.449077745  | 0.242466668 |
| Rai2 24004           | -1.031375268 | 0.439670832 | 1.224741387  | 0.086925157 |
| Cirbp 12696          | -1.031401097 | 0.433516308 | -1.176491471 | 0.163331047 |
| Rsrc1 66880          | -1.031442245 | 0.432209599 | 1.049647617  | 0.388907555 |
| Sys1 66460           | -1.031569527 | 0.391742709 | -1.031569527 | 0.391742709 |
| Eif3i 54709          | -1.031575349 | 0.415966893 | -1.031575349 | 0.415966893 |
| Spp2 75396           | -1.031612347 | 0.433273062 | -1.123395659 | 0.273910397 |
| Sdr39u1 654795       | -1.031801041 | 0.354902086 | -1.079467697 | 0.177100703 |
| Nfyc 18046           | -1.031901842 | 0.412357395 | -1.102758483 | 0.251607027 |
| Wdr60 217935         | -1.031907616 | 0.442645419 | -1.178585953 | 0.166676266 |
| Trim62 67525         | -1.031991158 | 0.471110775 | 1.647507276  | 0.067905027 |
| Gtf3c1 233863        | -1.032044628 | 0.346646588 | 1.058714064  | 0.166115797 |
| Rpl21 19933          | -1.032064914 | 0.451798475 | -1.069889491 | 0.365045843 |
| F12 58992            | -1.032131782 | 0.396781746 | -1.006764939 | 0.47918088  |
| Rnh1 107702          | -1.032174387 | 0.356985522 | -1.061352127 | 0.168422558 |
| Tsen2 381802         | -1.032224669 | 0.417190906 | 1.146142825  | 0.083681058 |
| Mmd2 75104           | -1.032237118 | 0.469221699 | -1.403255836 | 0.126603282 |
| Poc5 67463           | -1.032246504 | 0.426070804 | -1.007575961 | 0.472432146 |
| Cldn12 64945         | -1.032257102 | 0.417174761 | 1.094891158  | 0.207796711 |
| Pex13 72129          | -1.032259302 | 0.414934411 | -1.159523332 | 0.108303212 |



|                      |              |             |              |             |
|----------------------|--------------|-------------|--------------|-------------|
| Ciptm1 56457         | -1.032323919 | 0.365870315 | -1.139689895 | 0.050532825 |
| Foxo4 54601          | -1.03240499  | 0.402711091 | -1.215079983 | 0.008440883 |
| Zfp59 22717          | -1.032477491 | 0.480042661 | -2.250103451 | 0.074196186 |
| Cdc42bpg 240505      | -1.032509265 | 0.445301103 | 1.174417627  | 0.185318067 |
| Mrto4 69902          | -1.032572222 | 0.430210759 | -1.032572222 | 0.430210759 |
| Ankrd52 237615       | -1.03261091  | 0.465604385 | 1.562110885  | 0.033367542 |
| Chaf1b 110749        | -1.032661041 | 0.44891603  | -1.032661041 | 0.44891603  |
| Vps4a 116733         | -1.032723668 | 0.376977369 | -1.091639474 | 0.192937718 |
| Ermap 27028          | -1.032844168 | 0.485591506 | 1.255130842  | 0.411829119 |
| Klf13 50794          | -1.032859046 | 0.42398048  | -1.138467993 | 0.179139912 |
| 1810046J19Rik 103742 | -1.032892715 | 0.405805449 | -1.147862947 | 0.106093579 |
| Slc2a5 56485         | -1.032934804 | 0.448378275 | 1.292580073  | 0.082029291 |
| Cpsf3l 71957         | -1.032984801 | 0.436483008 | -1.231232188 | 0.089548723 |
| Gm13476 433424       | -1.032990279 | 0.462579257 | -1.207069162 | 0.2705832   |
| Colec11 71693        | -1.032994872 | 0.393430053 | -1.032994872 | 0.393430053 |
| Gm9104 668319        | -1.03303445  | 0.448070492 | -1.239578883 | 0.173425022 |
| 4932416H05Rik 654409 | -1.033123609 | 0.465780041 | 1.556713611  | 0.045907999 |
| Ctu1 233189          | -1.033203099 | 0.417250736 | 1.072339796  | 0.278751227 |
| Pgam2 56012          | -1.03320711  | 0.483068245 | -1.792828283 | 0.26550972  |
| Ganab 14376          | -1.033221528 | 0.320110122 | -1.086388723 | 0.080077226 |
| Arfgap3 66251        | -1.033263689 | 0.42813902  | 1.118263353  | 0.209054156 |
| Eps15l1 13859        | -1.033267321 | 0.410061891 | -1.125113056 | 0.198375394 |
| Tada1 27878          | -1.033333418 | 0.442222917 | -1.033333418 | 0.442222917 |
| Ralgds 19730         | -1.033392714 | 0.445217465 | -1.377807895 | 0.034211987 |
| Wfs1 22393           | -1.033413977 | 0.439276279 | 1.092577171  | 0.311099274 |
| Commd2 52245         | -1.033503895 | 0.417330114 | 1.148638288  | 0.135265782 |
| Setx 269254          | -1.033523246 | 0.468384732 | 1.303430422  | 0.259962272 |
| Slc9a8 77031         | -1.033529089 | 0.39978766  | 1.014008426  | 0.459523439 |
| Lgals8 56048         | -1.033565559 | 0.425793148 | -1.002537207 | 0.491658606 |
| Slc4a7 218756        | -1.033571227 | 0.465943898 | -1.166232585 | 0.259833607 |
| Snta1 20648          | -1.0335746   | 0.428820906 | -1.0335746   | 0.428820906 |
| Adi1 104923          | -1.033645329 | 0.35255887  | -1.140667146 | 0.027887787 |
| Pold3 67967          | -1.033667993 | 0.439052563 | 1.080021774  | 0.362658251 |
| Ganc 76051           | -1.033675934 | 0.441509817 | 1.056830472  | 0.399728134 |
| Tmco4 77056          | -1.033705157 | 0.418961688 | -1.108919143 | 0.252408475 |
| Incenp 16319         | -1.033713232 | 0.468435205 | -1.033713232 | 0.468435205 |
| Myopop 232934        | -1.033758733 | 0.463320737 | 1.107699885  | 0.398730526 |
| Myst2 217127         | -1.033794745 | 0.431934927 | -1.302390314 | 0.032843744 |
| Mapk6 50772          | -1.033812425 | 0.44705298  | -1.049545603 | 0.417135053 |
| Mettl6 67011         | -1.033888399 | 0.426487848 | -1.033888399 | 0.426487848 |
| Acad11 102632        | -1.033891495 | 0.41317733  | -1.033891495 | 0.41317733  |
| Dap3 65111           | -1.033896789 | 0.409130334 | -1.186933598 | 0.02263735  |
| Zfp85-rs1 22746      | -1.033937977 | 0.480432216 | 1.730652546  | 0.230959098 |
| F13b 14060           | -1.034076081 | 0.443451151 | -1.208418346 | 0.201310775 |
| Rnf220 66743         | -1.034108278 | 0.21959699  | -1.034108278 | 0.21959699  |
| Usp25 30940          | -1.034116576 | 0.415117012 | 1.164523337  | 0.07064634  |
| Eif5a 276770         | -1.034159799 | 0.30389502  | -1.065187654 | 0.075384489 |
| Gtdc1 227835         | -1.034186212 | 0.443347142 | 1.174399993  | 0.190838535 |
| Elp4 77766           | -1.034213303 | 0.43767221  | -1.321693468 | 0.03219599  |
| Ccnd3 12445          | -1.034218769 | 0.377547236 | -1.030791341 | 0.369794461 |
| Apod 11815           | -1.034233278 | 0.487300913 | -5.725       | 0.078582895 |
| Zfp296 63872         | -1.034235253 | 0.464940268 | -1.034235253 | 0.464940268 |
| Tcap 21393           | -1.034308472 | 0.487027443 | -7.367       | 0.093227434 |

|                      |              |             |              |             |
|----------------------|--------------|-------------|--------------|-------------|
| AY074887 246735      | -1.034308472 | 0.487027443 | -7.367       | 0.093227434 |
| Ptgfrn 19221         | -1.034312041 | 0.451578133 | 1.316171336  | 0.11029822  |
| Foxn2 14236          | -1.034326427 | 0.442879074 | -1.237336904 | 0.152935146 |
| Hebp1 15199          | -1.034379683 | 0.328400884 | -1.083544499 | 0.107833309 |
| Lars 107045          | -1.034406911 | 0.397045414 | 1.12577663   | 0.092401522 |
| Gimap8 243374        | -1.034433325 | 0.458377504 | -1.235279674 | 0.208963534 |
| Ogt 108155           | -1.034441599 | 0.453239692 | 1.188772601  | 0.256218211 |
| Tom1l2 216810        | -1.034449532 | 0.418432258 | -1.115336269 | 0.239891468 |
| Tfb2m 15278          | -1.034458973 | 0.434926695 | -1.128865505 | 0.26886835  |
| Pstk 214580          | -1.034737319 | 0.462920059 | -1.29543107  | 0.249631897 |
| Apoc3 11814          | -1.034754216 | 0.428841403 | -1.157674172 | 0.17296076  |
| Mccc1 72039          | -1.034851648 | 0.400776372 | -1.050196917 | 0.339770676 |
| Psenen 66340         | -1.03488043  | 0.447053634 | -1.292621154 | 0.108612396 |
| Psmc7 17463          | -1.034943902 | 0.304686423 | -1.034943902 | 0.304686423 |
| Iscu 66383           | -1.034948799 | 0.319983738 | 1.000260325  | 0.497895465 |
| Tor3a 30935          | -1.034950919 | 0.432620558 | -1.034950919 | 0.432620558 |
| Apc 11789            | -1.035008765 | 0.460245324 | 1.276178094  | 0.210184642 |
| Tmed8 382620         | -1.035060775 | 0.468381487 | -1.211325422 | 0.34829553  |
| Mrm1 217038          | -1.035087849 | 0.417243761 | -1.21754985  | 0.072435025 |
| Fundc2 67391         | -1.035105566 | 0.45791422  | -1.551751573 | 0.034183947 |
| 8430410K20Rik 78100  | -1.035187235 | 0.454097342 | 1.125182087  | 0.323673503 |
| Ankrd13a 68420       | -1.035273956 | 0.378678053 | 1.098406393  | 0.111014056 |
| Trp53bp2 209456      | -1.035276121 | 0.455890083 | 1.027548831  | 0.463378488 |
| Zfp689 71131         | -1.035370773 | 0.445896519 | -1.035370773 | 0.445896519 |
| Tbk1 56480           | -1.035384446 | 0.451547775 | -1.029884636 | 0.451352422 |
| A430033K04Rik 243308 | -1.035447471 | 0.418565115 | -1.229518772 | 0.074110668 |
| Sft2d2 108735        | -1.035470263 | 0.422855157 | 1.111896671  | 0.222775044 |
| Cwc22 80744          | -1.035472729 | 0.424886923 | -1.035472729 | 0.424886923 |
| Icmt 57295           | -1.03547643  | 0.259772313 | -1.03547643  | 0.259772313 |
| Zfp295 114565        | -1.035540152 | 0.402798438 | -1.035540152 | 0.402798438 |
| Decr1 67460          | -1.035558256 | 0.373061318 | -1.054143583 | 0.255723909 |
| Slc38a4 69354        | -1.035635855 | 0.338177799 | -1.138759352 | 0.023537177 |
| Cltc 67300           | -1.035638004 | 0.415708622 | 1.139251041  | 0.167059407 |
| 4933407C03Rik 74440  | -1.035653751 | 0.281270142 | 1.001910439  | 0.485512211 |
| Ambra1 228361        | -1.035713756 | 0.368410767 | 1.018970959  | 0.42616929  |
| Mettl7a1 70152       | -1.035742798 | 0.35363857  | -1.036979049 | 0.307501213 |
| Limd1 29806          | -1.035803417 | 0.336408051 | -1.09436102  | 0.114333754 |
| Nr2f6 13864          | -1.035873312 | 0.421988222 | -1.132282189 | 0.221550938 |
| Scarf1 380713        | -1.035985302 | 0.44731296  | -1.363296478 | 0.026239805 |
| Nup62 18226          | -1.036086556 | 0.409587972 | -1.221911587 | 0.055659001 |
| 4933439F18Rik 66771  | -1.036105589 | 0.388003176 | -1.036105589 | 0.388003176 |
| Kif1c 16562          | -1.036146274 | 0.319394415 | 1.052836039  | 0.157144819 |
| Poglut1 224143       | -1.036155015 | 0.427318329 | -1.036155015 | 0.427318329 |
| Vps35 65114          | -1.036163072 | 0.437824421 | -1.043938526 | 0.413294483 |
| Cbln3 56410          | -1.036239186 | 0.443913214 | -1.363979174 | 0.067129836 |
| Cln3 12752           | -1.0362963   | 0.378231945 | -1.0362963   | 0.378231945 |
| Plekhm2 69582        | -1.036306308 | 0.40183178  | -1.123885716 | 0.2038162   |
| Nudt6 229228         | -1.036345043 | 0.383973053 | -1.040319102 | 0.340911986 |
| Cnn3 71994           | -1.03641205  | 0.341528198 | -1.03641205  | 0.341528198 |
| Mrpl42 67270         | -1.036419635 | 0.359498839 | -1.014906918 | 0.429294093 |
| Zbtb17 22642         | -1.036437722 | 0.372431331 | 1.08004259   | 0.195348218 |
| Bnip3l 12177         | -1.036453925 | 0.341692582 | -1.137272746 | 0.045250219 |
| Arsa 11883           | -1.036468482 | 0.3778258   | 1.022311367  | 0.417201841 |

|                     |              |             |              |             |
|---------------------|--------------|-------------|--------------|-------------|
| Gm6682 626534       | -1.036491776 | 0.387085323 | -1.197605076 | 0.02781523  |
| Peli1 67245         | -1.036508458 | 0.431407594 | 1.219850531  | 0.094917449 |
| Fkbp3 30795         | -1.036582015 | 0.39611416  | 1.03564612   | 0.387502056 |
| Tmem183a 57439      | -1.036690919 | 0.247984155 | -1.036690919 | 0.247984155 |
| Comt 12846          | -1.036708037 | 0.401799511 | -1.140628954 | 0.162740308 |
| Marcks 17118        | -1.036766031 | 0.444926446 | -1.197589024 | 0.196774485 |
| Ndufs6 407785       | -1.036839926 | 0.400898565 | -1.206522426 | 0.054410513 |
| Arf4 11843          | -1.036851678 | 0.361358359 | -1.049612364 | 0.196681216 |
| Iars 105148         | -1.036875774 | 0.343159244 | -1.08790974  | 0.150680466 |
| Arhgef1 16801       | -1.036876445 | 0.306342747 | -1.036876445 | 0.306342747 |
| Hps1 192236         | -1.036906007 | 0.426266873 | 1.193526634  | 0.128247301 |
| Slc25a5 11740       | -1.03691393  | 0.292636525 | 1.005143826  | 0.462630445 |
| Ubqln2 54609        | -1.036986216 | 0.448406393 | 1.022295262  | 0.463761125 |
| Snrk 20623          | -1.036990922 | 0.403145433 | 1.142565455  | 0.098157898 |
| Mxra7 67622         | -1.036992129 | 0.38936925  | -1.149063317 | 0.088643283 |
| Clk1 12747          | -1.037037428 | 0.451789178 | -1.204073741 | 0.280828994 |
| Polr3h 78929        | -1.037092749 | 0.420385249 | -1.271166688 | 0.051037576 |
| Cyp4b1 13120        | -1.03711031  | 0.385950816 | -1.03711031  | 0.385950816 |
| Ankhd1 108857       | -1.037185656 | 0.399198134 | -1.117112384 | 0.194565128 |
| 1110001J03Rik 66117 | -1.037202605 | 0.422123274 | -1.166624908 | 0.193550373 |
| Casp7 12369         | -1.037205762 | 0.443703473 | -1.417754852 | 0.032484723 |
| D8Erttd738e 101966  | -1.037233243 | 0.425050731 | -1.190617627 | 0.159391741 |
| 2410016O06Rik 71952 | -1.037307419 | 0.430232396 | -1.107499404 | 0.3146139   |
| Bmp7 12162          | -1.037353642 | 0.470195195 | -1.876265586 | 0.068096032 |
| Magoh 17149         | -1.037372577 | 0.419986077 | -1.057611548 | 0.350327696 |
| Zfp668 244219       | -1.037410572 | 0.402883467 | -1.134276556 | 0.153399738 |
| Ebpl 68177          | -1.037439678 | 0.413593076 | -1.267815788 | 0.015064959 |
| Fam114a2 67726      | -1.037471131 | 0.395987573 | 1.02230569   | 0.438999651 |
| Hmgcl 15356         | -1.037501298 | 0.330611344 | -1.088219176 | 0.127929087 |
| Clcf1 56708         | -1.037557173 | 0.471992273 | 1.398956514  | 0.272131559 |
| Ddx27 228889        | -1.037561498 | 0.35255061  | -1.037561498 | 0.35255061  |
| 2400001E08Rik 66508 | -1.037648848 | 0.365283792 | -1.169471143 | 0.033674974 |
| Zcchc10 67966       | -1.03764978  | 0.450187151 | 1.160138968  | 0.262560957 |
| 1110058L19Rik 68002 | -1.037654607 | 0.41411375  | 1.058830116  | 0.348425241 |
| Sp110 109032        | -1.037673023 | 0.445687811 | -1.384045367 | 0.013343461 |
| Ube2l3 22195        | -1.037684968 | 0.299682347 | -1.037684968 | 0.299682347 |
| Pla1a 85031         | -1.037773017 | 0.328493214 | -1.037773017 | 0.328493214 |
| Abhd14a 68644       | -1.037818941 | 0.416953075 | -1.037818941 | 0.416953075 |
| Eea1 216238         | -1.037922431 | 0.468226042 | 1.145932609  | 0.347187261 |
| Ttpal 76080         | -1.03792416  | 0.445615467 | -1.180174307 | 0.248186107 |
| Zcchc24 71918       | -1.038021267 | 0.315039031 | 1.052311856  | 0.174445364 |
| Fga 14161           | -1.038052227 | 0.365031053 | -1.167198914 | 0.035643814 |
| Hkdc1 216019        | -1.038054744 | 0.480549365 | 1.823071741  | 0.250512967 |
| Tirap 117149        | -1.038055535 | 0.442969448 | 1.321557414  | 0.04112792  |
| Fam126b 213056      | -1.038096616 | 0.460593433 | -1.11789748  | 0.365747286 |
| Fam45a 67894        | -1.038128648 | 0.445937842 | -1.070535449 | 0.383025103 |
| Dzip1l 72507        | -1.038169681 | 0.478232479 | 1.673633937  | 0.250929993 |
| Dnajc11 230935      | -1.038187687 | 0.39543169  | -1.216365293 | 0.038316959 |
| Tfpi2 21789         | -1.038208739 | 0.445409534 | -1.227423014 | 0.227941586 |
| Nrarp 67122         | -1.038270982 | 0.466337622 | -1.038270982 | 0.466337622 |
| Vps33b 233405       | -1.038274957 | 0.368413504 | -1.136484538 | 0.068992616 |
| Trim37 68729        | -1.038286042 | 0.426323073 | -1.000915722 | 0.497771365 |
| Ubap2l 74383        | -1.038323709 | 0.287008623 | -1.079850831 | 0.113552953 |

|                      |              |             |              |             |
|----------------------|--------------|-------------|--------------|-------------|
| Prkaa2 108079        | -1.038421364 | 0.4098991   | 1.033900435  | 0.386802608 |
| Lamtor2 83409        | -1.038442003 | 0.381711809 | -1.102363468 | 0.223949081 |
| Unc79 217843         | -1.03852125  | 0.463098288 | 1.244508221  | 0.301900802 |
| Rrm1 20133           | -1.038567649 | 0.451206525 | -1.474855864 | 0.06451733  |
| Nln 75805            | -1.038569043 | 0.415416595 | 1.01973138   | 0.446601934 |
| Lipe 16890           | -1.03860856  | 0.370734388 | -1.09657145  | 0.216489109 |
| Napa 108124          | -1.038621435 | 0.39131723  | -1.110888558 | 0.226815272 |
| Slc25a34 384071      | -1.038676322 | 0.368593092 | -1.038676322 | 0.368593092 |
| Dolpp1 57170         | -1.038709306 | 0.373166229 | -1.013220457 | 0.458232349 |
| Fam117a 215512       | -1.038853463 | 0.438331983 | -1.140303702 | 0.290715307 |
| Gmeb2 229004         | -1.038892653 | 0.383836128 | -1.038892653 | 0.383836128 |
| Sdf4 20318           | -1.038977493 | 0.300239486 | -1.093399003 | 0.053713827 |
| Ly96 17087           | -1.03898119  | 0.450570681 | -1.115171141 | 0.328474869 |
| Zfp629 320683        | -1.039097057 | 0.405007207 | -1.136225212 | 0.209958313 |
| Ptov1 84113          | -1.039117054 | 0.423940116 | -1.196804023 | 0.162926182 |
| Thrap3 230753        | -1.039179809 | 0.296357611 | -1.039179809 | 0.296357611 |
| Rps2 16898           | -1.039227669 | 0.393258552 | -1.235094298 | 0.012223563 |
| Mrpl36 94066         | -1.039248525 | 0.392539261 | -1.144618245 | 0.095120678 |
| Serpina10 217847     | -1.039261661 | 0.374004161 | -1.039261661 | 0.374004161 |
| Eif4b 75705          | -1.039301057 | 0.307316586 | -1.039301057 | 0.307316586 |
| Arhgap23 58996       | -1.039317065 | 0.434293442 | -1.174680479 | 0.252053449 |
| Ahcyl2 74340         | -1.03938013  | 0.410414866 | -1.03938013  | 0.410414866 |
| Cd2bp2 70233         | -1.039393538 | 0.306058566 | 1.046975189  | 0.178072623 |
| Nmral1 67824         | -1.039394809 | 0.453899848 | -1.318926359 | 0.198017136 |
| Bloc1s2 73689        | -1.039459521 | 0.424894384 | -1.248228201 | 0.069351873 |
| A430078G23Rik 319493 | -1.039552837 | 0.472758298 | 1.329963963  | 0.327491449 |
| Zfp787 67109         | -1.03960619  | 0.371481879 | 1.039941229  | 0.35081562  |
| S100a11 20195        | -1.039635506 | 0.446098127 | -1.523432092 | 0.001883954 |
| Vps52 224705         | -1.0397033   | 0.276550711 | -1.076619398 | 0.126727631 |
| Chpt1 212862         | -1.03970669  | 0.400999236 | -1.037644834 | 0.364675583 |
| Sugp1 70616          | -1.039775503 | 0.36706737  | 1.007051714  | 0.471122659 |
| Usp1 231915          | -1.039814547 | 0.412375984 | 1.073153496  | 0.332670653 |
| Zc3h7b 20286         | -1.039821414 | 0.439656285 | 1.333046446  | 0.032025201 |
| Cdk17 237459         | -1.039897017 | 0.447782609 | 1.097793275  | 0.352681209 |
| Fcf1 73736           | -1.039965758 | 0.427595697 | 1.073738045  | 0.353464256 |
| Tbrg4 21379          | -1.040006762 | 0.324094358 | -1.067106925 | 0.23537367  |
| Omd 27047            | -1.040022904 | 0.476207007 | -1.457040245 | 0.28385737  |
| Gja1 14609           | -1.040082897 | 0.448924725 | 1.233826507  | 0.206653853 |
| Disp2 214240         | -1.040200234 | 0.471460787 | 1.144485906  | 0.409239478 |
| Zfp361 12192         | -1.04021046  | 0.444349493 | -1.007857149 | 0.48754048  |
| Nek6 59126           | -1.040214254 | 0.248708075 | -1.040214254 | 0.248708075 |
| Epm2aip1 77781       | -1.040320621 | 0.453710911 | 1.451510389  | 0.064572625 |
| Serpinb6a 20719      | -1.040365985 | 0.418305362 | -1.155037377 | 0.228879479 |
| Gm1987 100504362     | -1.040425288 | 0.475116807 | -1.053622661 | 0.465711755 |
| Cops8 108679         | -1.04051349  | 0.358451996 | 1.078261386  | 0.19113517  |
| Polg2 50776          | -1.040666688 | 0.458055008 | -1.360316213 | 0.142470119 |
| Pus3 67049           | -1.040734906 | 0.462634528 | 1.025461064  | 0.473225512 |
| Snap47 67826         | -1.040803076 | 0.32380671  | -1.092057894 | 0.131681287 |
| Plekho2 102595       | -1.040835504 | 0.393999984 | -1.040835504 | 0.393999984 |
| Xpo5 72322           | -1.040837778 | 0.403055148 | -1.154487876 | 0.176589969 |
| O610010F05Rik 71675  | -1.040840624 | 0.455531133 | 1.150179439  | 0.322701986 |
| Dock7 67299          | -1.040867001 | 0.460767293 | -1.040867001 | 0.460767293 |
| Fbxo33 70611         | -1.040874679 | 0.42227191  | -1.040874679 | 0.42227191  |

|                      |              |             |              |             |
|----------------------|--------------|-------------|--------------|-------------|
| Lenep 57275          | -1.040912642 | 0.465331461 | -1.240958209 | 0.305043794 |
| Fchsd2 207278        | -1.04094762  | 0.433028516 | -1.04094762  | 0.433028516 |
| Cfb 14962            | -1.041004499 | 0.367096634 | -1.126682583 | 0.13352085  |
| Ccdc86 108673        | -1.041113956 | 0.42546583  | 1.087198162  | 0.31782694  |
| Actg1 11465          | -1.041138202 | 0.396727865 | 1.023726907  | 0.441636312 |
| Hsdl1 72552          | -1.041148429 | 0.335663859 | -1.041148429 | 0.335663859 |
| Papd5 214627         | -1.041152272 | 0.444165424 | 1.127730382  | 0.279052594 |
| Tprkb 69786          | -1.041181604 | 0.338040921 | -1.085258484 | 0.122265135 |
| Tmem127 69470        | -1.04119755  | 0.393115921 | -1.04119755  | 0.393115921 |
| Ccs 12460            | -1.041298599 | 0.36449537  | 1.039110213  | 0.348818395 |
| Etohd2 13996         | -1.041327021 | 0.399263124 | -1.120442118 | 0.2224415   |
| Lamb3 16780          | -1.04134686  | 0.440000917 | 1.170730015  | 0.2529146   |
| Cotl1 72042          | -1.041359471 | 0.397640079 | -1.135131899 | 0.207778677 |
| Kif14 381293         | -1.041422578 | 0.481834526 | -3.967316667 | 0.09324139  |
| Arhgap8 73167        | -1.041422578 | 0.481834526 | -3.967316667 | 0.09324139  |
| Lix1 66643           | -1.041422578 | 0.481834526 | -3.967316667 | 0.09324139  |
| Gm1082 381868        | -1.041422578 | 0.481834526 | -3.967316667 | 0.09324139  |
| Dock11 75974         | -1.041422578 | 0.481834526 | -3.967316667 | 0.09324139  |
| Slc22a12 20521       | -1.041422578 | 0.481834526 | -3.967316667 | 0.09324139  |
| Klhl8 246293         | -1.041493961 | 0.452704406 | 1.243488774  | 0.243276926 |
| Blvra 109778         | -1.04156648  | 0.41840677  | -1.04156648  | 0.41840677  |
| Ltbp2 16997          | -1.041602765 | 0.478288598 | -2.217419325 | 0.174481199 |
| Leng9 243813         | -1.041618803 | 0.435245681 | 1.319071832  | 0.028616611 |
| Sdr42e1 74032        | -1.041666827 | 0.356367568 | -1.178518643 | 0.032394987 |
| Ankrd40 71452        | -1.041682282 | 0.293495963 | 1.039058354  | 0.260300308 |
| Bud31 231889         | -1.041755171 | 0.412321077 | -1.041755171 | 0.412321077 |
| Serpina11 380780     | -1.041789734 | 0.3943962   | -1.041789734 | 0.3943962   |
| Pex14 56273          | -1.041816845 | 0.318980418 | -1.079203587 | 0.201780762 |
| Tcf3 21423           | -1.041852297 | 0.382382866 | -1.22501588  | 0.019782339 |
| Zdhhc4 72881         | -1.041852685 | 0.350925846 | -1.041852685 | 0.350925846 |
| Hnrnpc 15381         | -1.04195009  | 0.26378533  | -1.123294539 | 0.003828545 |
| Dnajc25 72429        | -1.042099551 | 0.325640774 | -1.042099551 | 0.325640774 |
| BC004004 80748       | -1.042205338 | 0.382543998 | -1.042205338 | 0.382543998 |
| 2210013O21Rik 70123  | -1.042333886 | 0.470783876 | -1.614328214 | 0.191328352 |
| Gstm7 68312          | -1.042354974 | 0.358943476 | -1.042354974 | 0.358943476 |
| Erc1 111173          | -1.042376324 | 0.361674878 | 1.093195174  | 0.145125453 |
| Ulk2 29869           | -1.04241284  | 0.429110458 | 1.126479115  | 0.284774195 |
| Ralgapa1 56784       | -1.042416958 | 0.448904252 | 1.145154724  | 0.303751972 |
| Dnajc10 66861        | -1.042482967 | 0.421912727 | -1.178668562 | 0.218197199 |
| Eif4a3 192170        | -1.042524618 | 0.367000013 | 1.020298791  | 0.433518908 |
| Lmcd1 30937          | -1.042577311 | 0.45578029  | -1.042577311 | 0.45578029  |
| 2900053A13Rik 554362 | -1.04258317  | 0.436091727 | -1.065232008 | 0.331849242 |
| Txnrd1 50493         | -1.042652599 | 0.323326723 | -1.089929489 | 0.158798898 |
| Gga2 74105           | -1.042703136 | 0.398968759 | -1.042703136 | 0.398968759 |
| Hnrnpa2b1 53379      | -1.042767914 | 0.370461819 | 1.019041413  | 0.440515839 |
| Ankrd44 329154       | -1.04277258  | 0.459858691 | -1.418708542 | 0.148421125 |
| Dusp6 67603          | -1.04277301  | 0.44015313  | 1.201675253  | 0.210137355 |
| Efh2 27984           | -1.042824379 | 0.327380633 | 1.016588073  | 0.415072381 |
| Denr 68184           | -1.042877302 | 0.398961304 | 1.051699555  | 0.374349183 |
| Casp2 12366          | -1.042889219 | 0.456352429 | -1.23208918  | 0.31153902  |
| Txn2 56551           | -1.042952643 | 0.345955256 | -1.095965356 | 0.200032966 |
| 8430410A17Rik 232210 | -1.04296611  | 0.429210576 | 1.09660591   | 0.317560653 |
| Aurkaip1 66077       | -1.04301115  | 0.40537177  | -1.043439182 | 0.403692047 |

|                     |              |             |              |             |
|---------------------|--------------|-------------|--------------|-------------|
| Podn 242608         | -1.043199459 | 0.415690057 | -1.192520097 | 0.172596056 |
| Tfe3 209446         | -1.04320464  | 0.350464806 | -1.022257176 | 0.404923174 |
| Tacc1 320165        | -1.043281496 | 0.37320371  | -1.011256102 | 0.446624904 |
| Stggalnac6 50935    | -1.043319856 | 0.200653504 | -1.015218948 | 0.371337147 |
| Adrm1 56436         | -1.043367171 | 0.381105873 | 1.054213028  | 0.305812043 |
| Sdhaf2 66072        | -1.043412887 | 0.357405215 | 1.015708695  | 0.445555194 |
| Plekhhb2 226971     | -1.04342648  | 0.415505277 | -1.04342648  | 0.415505277 |
| Cideb 12684         | -1.043436092 | 0.338616606 | -1.017420561 | 0.417185836 |
| Ttc30b 72421        | -1.04352939  | 0.458995145 | -1.455419802 | 0.175078962 |
| Thra 21833          | -1.043536316 | 0.38508804  | -1.043536316 | 0.38508804  |
| BC026590 230234     | -1.043622989 | 0.437062294 | 1.126595614  | 0.3263594   |
| Grk5 14773          | -1.043643881 | 0.419402071 | 1.208054304  | 0.120368248 |
| Zfp609 214812       | -1.043777107 | 0.388877807 | 1.090106494  | 0.194181632 |
| Yif1a 68090         | -1.043808069 | 0.33492302  | -1.153648029 | 0.050965915 |
| Naip2 17948         | -1.043818649 | 0.414609218 | -1.128964641 | 0.265040131 |
| Fam151b 73942       | -1.043860533 | 0.438849515 | 1.355302925  | 0.026369906 |
| Tbrg1 21376         | -1.043862979 | 0.408492818 | -1.04316444  | 0.38642065  |
| Gng12 14701         | -1.043943235 | 0.35759638  | 1.003855823  | 0.486770694 |
| Mdm2 17246          | -1.044002944 | 0.390288544 | -1.098778546 | 0.251338745 |
| Agpat6 102247       | -1.04402651  | 0.304164376 | -1.096497424 | 0.126624185 |
| Fam19a5 106014      | -1.044173626 | 0.462609445 | -1.479388449 | 0.203729018 |
| Rwdd2b 53858        | -1.044212747 | 0.429107579 | -1.044212747 | 0.429107579 |
| 1700049G17Rik 73430 | -1.04421307  | 0.480549249 | 2.037346527  | 0.18884387  |
| Cpsf3 54451         | -1.044301778 | 0.319651402 | 1.053526273  | 0.245474719 |
| Syp 20977           | -1.044474946 | 0.37714983  | 1.118075452  | 0.143416338 |
| H2-DMb1 14999       | -1.044622084 | 0.457245839 | -1.69582472  | 0.0580612   |
| Fam100a 207740      | -1.044715268 | 0.389235668 | -1.139543705 | 0.199027079 |
| Pola1 18968         | -1.044721325 | 0.4649635   | -1.044721325 | 0.4649635   |
| Gm7854 665934       | -1.044733585 | 0.466850921 | -1.044733585 | 0.466850921 |
| H3f3b 15081         | -1.044751161 | 0.328797893 | -1.044751161 | 0.328797893 |
| Steap2 74051        | -1.04476489  | 0.459874784 | 1.40945721   | 0.18164137  |
| Ring1 19763         | -1.044784906 | 0.366746118 | 1.02668589   | 0.408004788 |
| Slc25a20 57279      | -1.044791132 | 0.326424907 | -1.077330229 | 0.18038604  |
| Rbpms2 71973        | -1.044805924 | 0.212286546 | -1.031195168 | 0.246851245 |
| Al413582 106672     | -1.044826842 | 0.434349269 | 1.101310605  | 0.360696559 |
| Mlf2 30853          | -1.044845155 | 0.37641904  | -1.119211942 | 0.214522614 |
| Inpp1 16329         | -1.044955552 | 0.429548955 | -1.245913359 | 0.172004165 |
| Gyk 14933           | -1.04497592  | 0.40444011  | 1.134938103  | 0.212571231 |
| Map4k2 26412        | -1.04505249  | 0.441787021 | 1.092617532  | 0.373989064 |
| Cops6 26893         | -1.045165809 | 0.372653785 | -1.221775869 | 0.028861145 |
| Ttc13 234875        | -1.045167331 | 0.357923247 | -1.08221565  | 0.26659977  |
| Mfsd10 68294        | -1.045240649 | 0.401126935 | 1.072261217  | 0.331285837 |
| Megf8 269878        | -1.045410753 | 0.373564657 | 1.038057369  | 0.372489125 |
| Ppp5c 19060         | -1.045411051 | 0.335161504 | -1.096538137 | 0.178766486 |
| Gab1 14388          | -1.045458611 | 0.420738682 | 1.229991132  | 0.111463955 |
| Calm3 12315         | -1.045608305 | 0.209543312 | 1.018318956  | 0.299339315 |
| Zer1 227693         | -1.045632945 | 0.305797439 | 1.002028537  | 0.489774199 |
| Phactr2 215789      | -1.045647734 | 0.412176848 | 1.222263887  | 0.049550994 |
| Tmprss2 50528       | -1.045651863 | 0.435037008 | 1.310819349  | 0.094815049 |
| Mcam 84004          | -1.04565989  | 0.424169154 | -1.18271621  | 0.153656451 |
| Tcp11l1 320554      | -1.045755036 | 0.4496925   | -1.045755036 | 0.4496925   |
| Cops5 26754         | -1.045766424 | 0.382723957 | -1.150152007 | 0.16230844  |
| 0610037P05Rik 66086 | -1.045770708 | 0.421200837 | -1.045770708 | 0.421200837 |

|                      |              |             |              |             |
|----------------------|--------------|-------------|--------------|-------------|
| C1qtnf1 56745        | -1.045805722 | 0.344442073 | -1.039642453 | 0.179911495 |
| Cd59a 12509          | -1.04581047  | 0.283666021 | -1.072371542 | 0.115267818 |
| Lrrfip1 16978        | -1.045815665 | 0.439592667 | 1.360682264  | 0.07307331  |
| Ifitm5 73835         | -1.045841336 | 0.479934407 | -3.98415     | 0.093264411 |
| Mtus1 102103         | -1.045856758 | 0.378414222 | 1.058839689  | 0.317525162 |
| A2ld1 223267         | -1.045877261 | 0.385476536 | 1.060220263  | 0.331326281 |
| Fam96b 68523         | -1.045883217 | 0.371946525 | -1.129811909 | 0.183898296 |
| Unc5a 107448         | -1.045890437 | 0.428066081 | -1.12345979  | 0.335499458 |
| Kdsr 70750           | -1.04589867  | 0.399335049 | -1.047594289 | 0.372579764 |
| Creb3l3 208677       | -1.045997091 | 0.329656905 | -1.045997091 | 0.329656905 |
| ORF61 216157         | -1.046057639 | 0.325817371 | -1.103295053 | 0.138484414 |
| Yipf6 77929          | -1.046078417 | 0.369653337 | -1.008206906 | 0.470231869 |
| 2810046L04Rik 212127 | -1.046108925 | 0.444387725 | -1.046108925 | 0.444387725 |
| Clcn6 26372          | -1.0462166   | 0.470733845 | -1.756698102 | 0.200157308 |
| Sft2d1 106489        | -1.046287256 | 0.368840569 | -1.046287256 | 0.368840569 |
| Rfxank 19727         | -1.046341655 | 0.373858935 | 1.001890849  | 0.494721432 |
| Csnk2a2 13000        | -1.046345628 | 0.358975779 | -1.046345628 | 0.358975779 |
| Haus1 225745         | -1.046536771 | 0.426263182 | -1.192898952 | 0.243143137 |
| Foxp4 74123          | -1.04654601  | 0.386411794 | -1.144352999 | 0.193927284 |
| Gtf2f2 68705         | -1.046567506 | 0.4103588   | -1.201775021 | 0.162858441 |
| Zfp445 235682        | -1.04664561  | 0.419313181 | -1.010627155 | 0.464344824 |
| Ppp4r1 70351         | -1.046706004 | 0.382989826 | 1.049959037  | 0.36418197  |
| Arih2 23807          | -1.046732074 | 0.308300705 | -1.046732074 | 0.308300705 |
| Mttr3 74302          | -1.046732348 | 0.381990577 | 1.130018363  | 0.143351882 |
| Hnf4a 15378          | -1.046778663 | 0.296145918 | -1.150493517 | 0.016797398 |
| Acox2 93732          | -1.046805989 | 0.379386285 | 1.104932607  | 0.196537701 |
| Cdc16 69957          | -1.046808854 | 0.374910814 | -1.046808854 | 0.374910814 |
| Hnrnpm 76936         | -1.046833745 | 0.337724081 | 1.080163167  | 0.166094159 |
| Glyat 107146         | -1.04688363  | 0.306756435 | 1.012722489  | 0.43045322  |
| Mmd 67468            | -1.046950868 | 0.379543824 | -1.163772813 | 0.128372184 |
| Psme3 19192          | -1.047219885 | 0.197248689 | -1.072940919 | 0.103449622 |
| 5430416O09Rik 71406  | -1.047247928 | 0.472067513 | -1.290366661 | 0.346379627 |
| Adprhl2 100206       | -1.047252762 | 0.376172608 | -1.2481755   | 0.017137048 |
| Lsm14b 241846        | -1.047350933 | 0.361664358 | -1.047350933 | 0.361664358 |
| Ccdc130 67736        | -1.047364851 | 0.399143322 | -1.133702779 | 0.232440768 |
| Tceal1 237052        | -1.047371519 | 0.475140161 | 1.973183884  | 0.200748856 |
| Gon4l 76022          | -1.047417406 | 0.399995646 | -1.295465739 | 0.034405818 |
| Hacl1 56794          | -1.047425952 | 0.379828397 | -1.047425952 | 0.379828397 |
| Grhl3 230824         | -1.047431906 | 0.483116311 | 1            | #DIV/0!     |
| Nat8l 269642         | -1.047431906 | 0.483116311 | 1            | #DIV/0!     |
| Olfm2 244723         | -1.047431906 | 0.483116311 | 1            | #DIV/0!     |
| Cpt1a 12894          | -1.047466189 | 0.407491775 | -1.143233074 | 0.23627006  |
| Nat9 66176           | -1.047546843 | 0.406634626 | -1.047546843 | 0.406634626 |
| Mrpl49 18120         | -1.047564927 | 0.327279802 | -1.11597021  | 0.132803081 |
| Ehbp1l1 114601       | -1.047595717 | 0.400569248 | 1.161743696  | 0.144950715 |
| Surf4 20932          | -1.047684572 | 0.24720069  | -1.023090192 | 0.329260363 |
| Litaf 56722          | -1.047793202 | 0.311244274 | -1.047793202 | 0.311244274 |
| C1qtnf9 239126       | -1.047871029 | 0.45896922  | -1.973070551 | 0.009943005 |
| Rexo1 66932          | -1.047881383 | 0.285519329 | -1.023041216 | 0.395325894 |
| Morc2a 74522         | -1.04796189  | 0.378748294 | -1.234266915 | 0.022322643 |
| Plekha1 101476       | -1.048096768 | 0.447709279 | 1.309678177  | 0.1730362   |
| Kif3a 16568          | -1.048133049 | 0.359190301 | -1.043053296 | 0.341387487 |
| Cenpb 12616          | -1.048145351 | 0.313689926 | -1.048145351 | 0.313689926 |

|                         |              |             |              |             |
|-------------------------|--------------|-------------|--------------|-------------|
| Tom22 223696            | -1.048162922 | 0.341700073 | -1.048162922 | 0.341700073 |
| Trabd 67976             | -1.048197447 | 0.375988565 | 1.133092505  | 0.109546831 |
| Slc17a4 319848          | -1.048332685 | 0.391715994 | 1.180881357  | 0.052468563 |
| 6330408A02Rik 321008    | -1.048338722 | 0.401102457 | 1.157744603  | 0.179182403 |
| Tbc1d13 70296           | -1.048442759 | 0.380007104 | -1.017558629 | 0.430828496 |
| Yme1l1 27377            | -1.048496971 | 0.358138174 | -1.09421783  | 0.250172772 |
| Rps19bp1 66538          | -1.048519858 | 0.402030649 | -1.126428134 | 0.281680269 |
| Abcc3 76408             | -1.048567589 | 0.323030442 | -1.13264995  | 0.075553075 |
| Tmem119 231633          | -1.048586525 | 0.464839336 | 1.75158346   | 0.127450781 |
| Proc 19123              | -1.048653288 | 0.395123703 | -1.180270419 | 0.161967213 |
| Grk6 26385              | -1.048662333 | 0.329306906 | 1.030054882  | 0.363443069 |
| Sgk3 170755             | -1.048666233 | 0.426107516 | 1.124339648  | 0.226860117 |
| Abhd15 67477            | -1.048709405 | 0.370375923 | -1.246409766 | 0.013226298 |
| Kdelr2 66913            | -1.048748102 | 0.334653763 | -1.107299304 | 0.184878781 |
| 9030025P20Rik 100041574 | -1.048809655 | 0.433268285 | 1.076505449  | 0.403841095 |
| Itih2 16425             | -1.048846134 | 0.34924424  | 1.002094055  | 0.493417534 |
| Senp5 320213            | -1.048888224 | 0.421483247 | -1.224420913 | 0.195582912 |
| Hsf4 26386              | -1.048909189 | 0.403361364 | -1.318174502 | 0.024380414 |
| 2410001C21Rik 66404     | -1.048928464 | 0.322075261 | -1.048928464 | 0.322075261 |
| Msra 110265             | -1.049006345 | 0.249462107 | -1.049006345 | 0.249462107 |
| Tusc2 80385             | -1.049037737 | 0.227654931 | -1.016563184 | 0.391453228 |
| Dhx16 69192             | -1.049142075 | 0.344696131 | -1.198629618 | 0.032105189 |
| Pttg1 30939             | -1.049167847 | 0.355595133 | -1.024122262 | 0.407365614 |
| D19Wsu162e 226178       | -1.049269415 | 0.317174844 | -1.133567675 | 0.066016421 |
| Cd5l 11801              | -1.049270421 | 0.380267649 | -1.191259713 | 0.085897617 |
| Ppp1r1b 19049           | -1.049351709 | 0.417034336 | 1.065280707  | 0.380111061 |
| 0610011F06Rik 68347     | -1.049416882 | 0.373704315 | -1.141533027 | 0.18652911  |
| Cnih 12793              | -1.049429949 | 0.377783148 | -1.049429949 | 0.377783148 |
| Hist1h1c 50708          | -1.049475442 | 0.407959299 | -1.193916256 | 0.191285336 |
| Pja1 18744              | -1.049506205 | 0.348456724 | 1.03644098   | 0.349883876 |
| 2610301G19Rik 219158    | -1.049506526 | 0.349107103 | -1.049506526 | 0.349107103 |
| Ercc6 319955            | -1.049513747 | 0.42791712  | -1.049513747 | 0.42791712  |
| Pgrmc2 70804            | -1.049600186 | 0.333837438 | -1.049600186 | 0.333837438 |
| Sin3b 20467             | -1.049624467 | 0.350007335 | -1.12571554  | 0.170155975 |
| Plau 18792              | -1.049696284 | 0.470380931 | -1.927200277 | 0.17672832  |
| Bcmo1 63857             | -1.049697332 | 0.372013753 | -1.163683061 | 0.129791303 |
| Csnk2a1 12995           | -1.049715541 | 0.374862923 | 1.065705785  | 0.300429287 |
| Dnajc21 78244           | -1.049784216 | 0.397064415 | -1.046958268 | 0.361295294 |
| Lrrc25 211228           | -1.049804534 | 0.444274362 | 1.324137311  | 0.127740125 |
| Atp5a1 11946            | -1.049958439 | 0.295095692 | -1.098776629 | 0.133080825 |
| Edc4 234699             | -1.049962229 | 0.169322031 | -1.049962229 | 0.169322031 |
| 2700060E02Rik 68045     | -1.049994454 | 0.357033826 | 1.007944727  | 0.475434439 |
| Vprbp 321006            | -1.050022106 | 0.339073934 | -1.040946233 | 0.311321331 |
| Med22 20933             | -1.050105604 | 0.29977736  | -1.070503604 | 0.167117531 |
| Mea1 17256              | -1.05012375  | 0.34472675  | 1.028158676  | 0.399033077 |
| Cyp2j5 13109            | -1.050175049 | 0.274378421 | -1.028529525 | 0.283140225 |
| Asnsd1 70396            | -1.050198529 | 0.325262693 | -1.047513866 | 0.268233603 |
| Galk2 69976             | -1.050280526 | 0.368025185 | -1.025436661 | 0.401491637 |
| Itpkc 233011            | -1.050303531 | 0.383064633 | -1.166659129 | 0.163460691 |
| Chd9 109151             | -1.050307613 | 0.419875496 | 1.290337295  | 0.043688026 |
| Kptn 70394              | -1.050323476 | 0.415073148 | -1.279039508 | 0.089628848 |
| Taok2 381921            | -1.050510615 | 0.341726475 | -1.050510615 | 0.341726475 |
| Arhgef17 207212         | -1.050573941 | 0.418090763 | 1.031408935  | 0.452434412 |



|                      |              |             |              |             |
|----------------------|--------------|-------------|--------------|-------------|
| Unc50 67387          | -1.050640102 | 0.400493854 | 1.023972523  | 0.429926236 |
| Aen 68048            | -1.050829153 | 0.306564363 | -1.081018591 | 0.232368596 |
| Taf11 68776          | -1.050833827 | 0.374341353 | -1.261680857 | 0.023505352 |
| Ccdc164 381738       | -1.05091797  | 0.44123352  | -1.051461491 | 0.402990633 |
| Klhl4 237010         | -1.050931864 | 0.471072676 | -1.809413362 | 0.226028814 |
| Sfxn5 94282          | -1.05097524  | 0.275000296 | 1.001479659  | 0.491840729 |
| Mospd3 68929         | -1.051033155 | 0.424836832 | -1.041035799 | 0.429093058 |
| Rars2 109093         | -1.051045429 | 0.415609187 | -1.260555318 | 0.13036389  |
| Casp6 12368          | -1.051149515 | 0.40831673  | -1.051149515 | 0.40831673  |
| Trio 223435          | -1.051154097 | 0.449246803 | 1.49349412   | 0.089919524 |
| Mier1 71148          | -1.051160922 | 0.374781586 | -1.010469689 | 0.454854183 |
| Grwd1 101612         | -1.0512403   | 0.380671504 | 1.065437173  | 0.326385335 |
| Atp5d 66043          | -1.051291316 | 0.370738658 | -1.236161909 | 0.049034081 |
| Ctdspl 69274         | -1.051329134 | 0.421110922 | 1.067777013  | 0.401514927 |
| Tmem68 72098         | -1.051355205 | 0.42268925  | 1.111985762  | 0.33489327  |
| Dscr3 13185          | -1.051388092 | 0.346616587 | -1.147386108 | 0.115148639 |
| Angptl6 70726        | -1.051398972 | 0.386127133 | 1.054378878  | 0.37225659  |
| Cdh2 12558           | -1.051402298 | 0.339194552 | 1.038903743  | 0.34317536  |
| Apof 103161          | -1.051436088 | 0.203007067 | -1.051436088 | 0.203007067 |
| Tapbp 21356          | -1.051549182 | 0.306229824 | -1.143927017 | 0.031727128 |
| Kcnq1 16535          | -1.051591711 | 0.451797074 | -1.874576599 | 0.007051356 |
| Pah 18478            | -1.051596207 | 0.385828722 | 1.051764205  | 0.379393778 |
| Mrps14 64659         | -1.051599894 | 0.303234915 | -1.051599894 | 0.303234915 |
| Dbnl 13169           | -1.051667258 | 0.255696831 | -1.051667258 | 0.255696831 |
| N4bp2l1 100637       | -1.051703238 | 0.3716129   | 1.014300537  | 0.461882748 |
| 6720456H20Rik 218989 | -1.051716511 | 0.39424696  | -1.051716511 | 0.39424696  |
| Osgin2 209212        | -1.051745845 | 0.456211913 | 1.129754906  | 0.387322132 |
| 2510039018Rik 77034  | -1.051796443 | 0.303277137 | -1.068461903 | 0.18566813  |
| Gins3 78833          | -1.051803454 | 0.470788619 | -1.123868494 | 0.441486971 |
| Asna1 56495          | -1.051827523 | 0.378237035 | -1.051827523 | 0.378237035 |
| Esyt2 52635          | -1.051930684 | 0.390431336 | 1.102085037  | 0.201946696 |
| Xrcc5 22596          | -1.051979331 | 0.297565576 | -1.001251989 | 0.49450511  |
| Erbp2ip 59079        | -1.051984699 | 0.432591706 | 1.338556787  | 0.098610275 |
| Yipf1 230584         | -1.051998133 | 0.383854574 | -1.202728962 | 0.101457076 |
| 2210012G02Rik 66526  | -1.052116043 | 0.373196903 | -1.068290707 | 0.275785091 |
| Kpnb1 16211          | -1.052123427 | 0.310168927 | -1.102170003 | 0.162695008 |
| Mkln1 27418          | -1.052150755 | 0.384365921 | 1.027695865  | 0.438628181 |
| Sri 109552           | -1.052162413 | 0.330405157 | -1.052162413 | 0.330405157 |
| Hyou1 12282          | -1.052208674 | 0.422310438 | 1.089065999  | 0.239463879 |
| Islr 26968           | -1.052283778 | 0.415873125 | -1.038934284 | 0.40106454  |
| Kpna4 16649          | -1.052309139 | 0.395275457 | 1.203908201  | 0.058340452 |
| Tmem5 216395         | -1.052311819 | 0.415361513 | -1.052311819 | 0.415361513 |
| C1rl 232371          | -1.052320508 | 0.310683062 | -1.027750213 | 0.356336736 |
| Rhbdf1 13650         | -1.052397015 | 0.380055893 | 1.02190793   | 0.44990977  |
| Plekho1 67220        | -1.052429054 | 0.421007203 | -1.133559974 | 0.223190582 |
| Ttc17 74569          | -1.05257098  | 0.345917996 | -1.236561271 | 0.006781385 |
| Nxt1 56488           | -1.052774713 | 0.393343491 | -1.012269361 | 0.460332679 |
| Zbtb10 229055        | -1.052803934 | 0.437885514 | -1.218686057 | 0.252133213 |
| Tmem37 170706        | -1.052814829 | 0.404585581 | -1.024194035 | 0.448860506 |
| Zfp111 56707         | -1.05284656  | 0.391721098 | 1.064201399  | 0.290613952 |
| Brd1 223770          | -1.052940184 | 0.421042231 | 1.025487958  | 0.461825812 |
| Ddrgk1 77006         | -1.05294113  | 0.380240753 | -1.138198541 | 0.232354656 |
| Tmem184c 234463      | -1.053034731 | 0.437461522 | -1.106345348 | 0.370532155 |

|                     |              |             |              |             |
|---------------------|--------------|-------------|--------------|-------------|
| Nup98 269966        | -1.053068565 | 0.374000776 | -1.206037789 | 0.066693882 |
| Smurf1 75788        | -1.053104862 | 0.416850048 | 1.069437698  | 0.380870024 |
| Clint1 216705       | -1.053176768 | 0.407314114 | 1.101649302  | 0.313857981 |
| Zcchc8 70650        | -1.053220779 | 0.312018882 | 1.066827684  | 0.200965787 |
| Wwox 80707          | -1.053261621 | 0.397140949 | -1.138096808 | 0.252460259 |
| Med17 234959        | -1.053267785 | 0.416626011 | -1.053267785 | 0.416626011 |
| Srsf2 20382         | -1.053303477 | 0.350845634 | 1.018624988  | 0.439796836 |
| Nipal3 74552        | -1.05335474  | 0.423229778 | 1.294701911  | 0.09740734  |
| Cerkl 228094        | -1.053406502 | 0.454666428 | -1.053406502 | 0.454666428 |
| Gfm2 320806         | -1.053410291 | 0.289231315 | 1.00421057   | 0.478634529 |
| Gm6813 627939       | -1.053433226 | 0.403327647 | -1.190675385 | 0.207595511 |
| Dub1 13531          | -1.053527317 | 0.470697005 | 1.481669861  | 0.318085772 |
| Usp35 244144        | -1.053651236 | 0.431515671 | -1.412295159 | 0.081534115 |
| Fam125a 73711       | -1.053732336 | 0.363011271 | -1.009089272 | 0.471264925 |
| Gm2a 14667          | -1.053758784 | 0.353077893 | -1.053758784 | 0.353077893 |
| Mphosph8 75339      | -1.053866453 | 0.450076515 | 1.255420717  | 0.295406679 |
| Tspan33 232670      | -1.053882996 | 0.394362397 | -1.053882996 | 0.394362397 |
| Pgm2 72157          | -1.05388505  | 0.251609118 | -1.144522849 | 0.022273229 |
| Man2a1 17158        | -1.053886917 | 0.259280425 | -1.025469741 | 0.263445085 |
| Larp4 207214        | -1.05391149  | 0.402601257 | 1.070327449  | 0.258829034 |
| Tmed4 103694        | -1.053925528 | 0.32821288  | -1.056122479 | 0.324121953 |
| Ccdc85b 240514      | -1.05393033  | 0.42623138  | -1.05393033  | 0.42623138  |
| D10Wsu52e 28088     | -1.053957575 | 0.269914455 | -1.078145881 | 0.204121228 |
| 1500011K16Rik 67885 | -1.0539637   | 0.318279795 | -1.109295963 | 0.164819465 |
| Slc35a1 24060       | -1.054017456 | 0.372804477 | -1.260609471 | 0.043183685 |
| Trp53rk 76367       | -1.054098993 | 0.422982459 | -1.030173418 | 0.453400109 |
| Krt18 16668         | -1.054107743 | 0.367530743 | -1.14675816  | 0.191152444 |
| 1190003J15Rik 76974 | -1.054132139 | 0.365601233 | -1.133100994 | 0.216476555 |
| Polr2i 69920        | -1.054163548 | 0.383960738 | -1.178726756 | 0.119187471 |
| Cdkal1 68916        | -1.054206678 | 0.418127996 | -1.252738032 | 0.181111049 |
| Pmvk 68603          | -1.054233822 | 0.370296031 | -1.080058343 | 0.27712045  |
| Atg4c 242557        | -1.054242939 | 0.386044684 | -1.095347546 | 0.223929289 |
| Mup5 17844          | -1.054253062 | 0.413732448 | -1.033103187 | 0.392919644 |
| Mrpl12 56282        | -1.054338763 | 0.359899523 | -1.160323919 | 0.141669506 |
| Lsm1 78304          | -1.054405806 | 0.397102806 | 1.037639693  | 0.419253673 |
| Ankrd35 213121      | -1.054420727 | 0.476263483 | -4.016833333 | 0.093227909 |
| Rab40b 217371       | -1.054420727 | 0.476263483 | -4.016833333 | 0.093227909 |
| Kpna6 16650         | -1.054436362 | 0.361099075 | -1.007272413 | 0.468593941 |
| Dcps 69305          | -1.054524158 | 0.364362406 | -1.054524158 | 0.364362406 |
| Prpf40a 56194       | -1.05454556  | 0.434407542 | 1.21889119   | 0.240414953 |
| Ltn1 78913          | -1.054571528 | 0.378897665 | 1.062287971  | 0.346101589 |
| Grb7 14786          | -1.05462454  | 0.267252889 | -1.05462454  | 0.267252889 |
| Kdm5c 20591         | -1.054631208 | 0.278115031 | -1.054631208 | 0.278115031 |
| Wdr46 57315         | -1.054633662 | 0.35001008  | 1.074184011  | 0.27054121  |
| Pzp 11287           | -1.054664789 | 0.399484024 | -1.366574851 | 0.01637783  |
| Txn1 22166          | -1.05467129  | 0.303444657 | 1.046630886  | 0.295941127 |
| Tcf20 21411         | -1.054701758 | 0.372050878 | -1.007711374 | 0.474551575 |
| Ptms 69202          | -1.05472435  | 0.425921413 | -1.157422394 | 0.20840897  |
| Hcfc1r1 353502      | -1.05473787  | 0.374419894 | 1.040442222  | 0.401935378 |
| Uckl1 68556         | -1.054742083 | 0.38509755  | -1.127699034 | 0.215523779 |
| Mal 17153           | -1.05483     | 0.478341436 | -2.8202      | 0.173296754 |
| Snip1 76793         | -1.054872749 | 0.3980532   | 1.030939519  | 0.439131775 |
| Zfp691 195522       | -1.054903229 | 0.376655925 | -1.054903229 | 0.376655925 |

|                      |              |             |              |             |
|----------------------|--------------|-------------|--------------|-------------|
| Bcl2l2 12050         | -1.054925785 | 0.431326584 | 1.192196411  | 0.26333273  |
| Aktip 14339          | -1.055028211 | 0.406054624 | -1.154580917 | 0.210612364 |
| Gm5766 436332        | -1.05505964  | 0.408870112 | -1.05505964  | 0.408870112 |
| 5830416P10Rik 381232 | -1.055094871 | 0.479210987 | 3.3          | 0.173296754 |
| Tomm5 68512          | -1.055103785 | 0.380056615 | -1.055103785 | 0.380056615 |
| Cox10 70383          | -1.0551098   | 0.327255799 | -1.138517089 | 0.088562089 |
| Mrap 77037           | -1.055119651 | 0.327975571 | -1.110969824 | 0.20230112  |
| Serpinc1 11905       | -1.055128723 | 0.194195132 | -1.096281627 | 0.043087258 |
| Mgea5 76055          | -1.055176333 | 0.396613278 | 1.053717095  | 0.38602698  |
| Tnfaip8l2 69769      | -1.055199081 | 0.425071413 | 1.08940732   | 0.36637518  |
| Srpr 67398           | -1.055218531 | 0.233317861 | -1.007435361 | 0.450845864 |
| Letm2 270035         | -1.055243192 | 0.409938642 | 1.079052352  | 0.351259307 |
| Pon1 18979           | -1.055251296 | 0.32345142  | 1.012062298  | 0.456435385 |
| Efr3b 668212         | -1.055332313 | 0.47449419  | 1.150701957  | 0.450338304 |
| Zfr 22763            | -1.055390638 | 0.427532048 | 1.069192251  | 0.321784499 |
| AW146154 101835      | -1.055458816 | 0.446427105 | -1.380110041 | 0.219843227 |
| Tmem168 101118       | -1.055487982 | 0.41662487  | -1.303488639 | 0.11473491  |
| St3gal4 20443        | -1.055561453 | 0.272760925 | -1.021727153 | 0.355795171 |
| Scamp4 56214         | -1.055583189 | 0.282576133 | -1.070927415 | 0.175405399 |
| Fam175a 70681        | -1.055761876 | 0.428899488 | -1.196302832 | 0.262683467 |
| Ddx55 67848          | -1.055766635 | 0.366151258 | -1.07308869  | 0.269629398 |
| Chst2 54371          | -1.055804671 | 0.399676989 | -1.11962433  | 0.207534161 |
| Txndc11 106200       | -1.055834923 | 0.393229927 | -1.211840334 | 0.153095059 |
| Icam4 78369          | -1.055895156 | 0.480218211 | 1            | #DIV/0!     |
| Anxa11 11744         | -1.055923349 | 0.303798841 | 1.005681015  | 0.475365629 |
| Nrbf2 641340         | -1.055926906 | 0.392911692 | 1.079927493  | 0.303193823 |
| Tcte2 21646          | -1.056007366 | 0.469443787 | 1.488232276  | 0.316376312 |
| Pcbp2 18521          | -1.056020171 | 0.280446937 | 1.016311763  | 0.30908079  |
| Rbm26 74213          | -1.056122887 | 0.446202226 | 1.395613884  | 0.136648334 |
| Birc6 12211          | -1.056131346 | 0.366472782 | 1.027724442  | 0.344710228 |
| Bbox1 170442         | -1.056280315 | 0.338540693 | 1.006213749  | 0.480010448 |
| 1810013D10Rik 66278  | -1.056304571 | 0.360409019 | -1.129523953 | 0.225041423 |
| Abcf3 27406          | -1.056330688 | 0.22323203  | -1.056234472 | 0.153190563 |
| Kras 16653           | -1.056335916 | 0.352916402 | 1.048766015  | 0.345252305 |
| Krba1 77827          | -1.056337242 | 0.380502481 | -1.056337242 | 0.380502481 |
| C2cd2l 71764         | -1.056372867 | 0.333923631 | -1.072534692 | 0.198103366 |
| Cd72 12517           | -1.056501795 | 0.429791809 | -1.229911766 | 0.220908441 |
| Syvn1 74126          | -1.056518339 | 0.392366016 | -1.003283811 | 0.489952724 |
| Dad1 13135           | -1.056554555 | 0.355714259 | 1.046526315  | 0.36029988  |
| Psen1 19164          | -1.05659054  | 0.222070784 | -1.104242853 | 0.072136553 |
| Cul4a 99375          | -1.056597178 | 0.384673451 | 1.157946379  | 0.166620669 |
| Ngf 18049            | -1.056619551 | 0.399722682 | -1.056619551 | 0.399722682 |
| Adarb2 94191         | -1.056664549 | 0.47661978  | 1.428581492  | 0.383239861 |
| Map3k7 26409         | -1.056678679 | 0.373092414 | -1.184935134 | 0.142991706 |
| Tmem150a 232086      | -1.056699515 | 0.305063062 | -1.079139213 | 0.209184769 |
| Fam199x 245622       | -1.05670915  | 0.377831797 | -1.09033212  | 0.276006234 |
| Fam20a 208659        | -1.056731807 | 0.354651661 | -1.147758306 | 0.175003242 |
| Naa16 66897          | -1.056745632 | 0.412271738 | -1.448718417 | 0.007327985 |
| Deptor 97998         | -1.056773398 | 0.388879829 | 1.035827728  | 0.350642887 |
| Mob1b 68473          | -1.056779997 | 0.43439072  | 1.125605746  | 0.270595644 |
| Abhd5 67469          | -1.05685726  | 0.281837939 | -1.123215493 | 0.068524655 |
| Smarcal1 54380       | -1.056884855 | 0.403936999 | 1.037265385  | 0.376463016 |
| Ilk 16202            | -1.056895186 | 0.320645511 | 1.08232083   | 0.171145812 |

|                     |              |             |              |             |
|---------------------|--------------|-------------|--------------|-------------|
| Ftsj3 56095         | -1.056974367 | 0.314119572 | 1.017145827  | 0.426408249 |
| Klraq1 73825        | -1.056974707 | 0.369811057 | -1.005580152 | 0.48765328  |
| Gm8615 667410       | -1.056982799 | 0.380330064 | -1.097226642 | 0.268324326 |
| Al317395 215929     | -1.056994726 | 0.383607422 | 1.15035317   | 0.184949447 |
| PrkcsH 19089        | -1.057041727 | 0.337143856 | -1.057041727 | 0.337143856 |
| Endou 19011         | -1.057057135 | 0.477310394 | -8.121       | 0.046661899 |
| Tmem159 233806      | -1.057098552 | 0.360723975 | -1.076739949 | 0.286473052 |
| D4Ertd22e 213491    | -1.05720539  | 0.277582415 | -1.071948963 | 0.162054735 |
| Map2k7 26400        | -1.057223356 | 0.330153563 | 1.082901739  | 0.210533051 |
| Tnfrsf11a 21934     | -1.057225662 | 0.457811156 | -1.761738237 | 0.129185532 |
| Spry1 24063         | -1.057258484 | 0.413396541 | -1.206464284 | 0.240746615 |
| Dpy30 66310         | -1.05734868  | 0.371497074 | 1.05756507   | 0.354963042 |
| Ubxn4 67812         | -1.057403294 | 0.258649067 | -1.007569725 | 0.461842415 |
| Enpp4 224794        | -1.057407304 | 0.44825232  | 1.186259146  | 0.298925108 |
| Pex6 224824         | -1.057523795 | 0.35411076  | -1.205935454 | 0.042857708 |
| Adrbk1 110355       | -1.057528219 | 0.218308305 | -1.096679019 | 0.101318511 |
| Gm10767 100038538   | -1.057607814 | 0.39370366  | 1.211785302  | 0.084079804 |
| Slc7a1 11987        | -1.057622589 | 0.458973409 | 1.890534483  | 0.069915791 |
| Gdpd5 233552        | -1.057685162 | 0.443507123 | -1.200569815 | 0.317403676 |
| Lhpp 76429          | -1.057708372 | 0.324124219 | 1.028570746  | 0.378379421 |
| Lpar5 381810        | -1.057714028 | 0.467373956 | -1.821090369 | 0.224432855 |
| Lrrc16b 268747      | -1.057714028 | 0.467373956 | -1.821090369 | 0.224432855 |
| 1810074P20Rik 67490 | -1.057741415 | 0.37827903  | 1.151649028  | 0.156252362 |
| Tceb3 27224         | -1.057749885 | 0.31658121  | -1.118722347 | 0.155926487 |
| Mcm4 17217          | -1.057755473 | 0.441379359 | 1.16121803   | 0.355039293 |
| Atg13 51897         | -1.057784086 | 0.315103203 | -1.122486653 | 0.140753288 |
| Katnal1 231912      | -1.057796941 | 0.427294884 | -1.181662258 | 0.311445896 |
| Meis2 17536         | -1.057856076 | 0.42060554  | -1.329690786 | 0.125440281 |
| Arid3b 56380        | -1.057894276 | 0.435231155 | -1.443970963 | 0.106640904 |
| Rnf170 77733        | -1.057898698 | 0.43236928  | -1.034950273 | 0.451469674 |
| Ppp2r5a 226849      | -1.057969992 | 0.339475277 | 1.039638735  | 0.364161668 |
| Cflar 12633         | -1.05802986  | 0.242382159 | 1.039999284  | 0.206315784 |
| Afm 280662          | -1.058041037 | 0.374448398 | -1.160578517 | 0.168970102 |
| Ranbp1 19385        | -1.058078191 | 0.353085891 | -1.129490655 | 0.219793147 |
| Gm4952 240549       | -1.05812561  | 0.375094354 | -1.05812561  | 0.375094354 |
| Rpl31 114641        | -1.058209087 | 0.411982159 | -1.280712635 | 0.14487834  |
| Ankzf1 52231        | -1.058232854 | 0.339231945 | -1.058232854 | 0.339231945 |
| Mll1 214162         | -1.058249267 | 0.400748755 | 1.078908606  | 0.254331472 |
| Rala 56044          | -1.058261117 | 0.363618849 | -1.074149395 | 0.304186859 |
| Rer1 67830          | -1.058315168 | 0.148654654 | -1.081758289 | 0.084613657 |
| Arap1 69710         | -1.05834277  | 0.302271698 | -1.123035074 | 0.118554223 |
| Zscan29 99334       | -1.058358128 | 0.377667765 | -1.183434844 | 0.171759542 |
| Pttg1ip 108705      | -1.058628104 | 0.349991742 | 1.035034025  | 0.398307039 |
| Errfi1 74155        | -1.05871109  | 0.350141375 | 1.11785144   | 0.148562124 |
| Cdk11b 12537        | -1.0587124   | 0.252611239 | -1.117411979 | 0.058903408 |
| Slc39a13 68427      | -1.058716562 | 0.283609919 | -1.123406815 | 0.112706153 |
| Ahr 11622           | -1.058754013 | 0.437643653 | 1.474601542  | 0.06721011  |
| Ubxn2a 217379       | -1.058820606 | 0.346818665 | 1.019709759  | 0.44469135  |
| Atg10 66795         | -1.058866135 | 0.420785444 | -1.058866135 | 0.420785444 |
| Bptf 207165         | -1.058957903 | 0.419781974 | -1.099530844 | 0.337007635 |
| Uox 22262           | -1.058984766 | 0.266215468 | -1.084458912 | 0.151583927 |
| Erf 13875           | -1.059036277 | 0.30277817  | -1.059036277 | 0.30277817  |
| BC020535 228788     | -1.059045478 | 0.406468283 | 1.041875297  | 0.42965397  |

|                      |              |             |              |             |
|----------------------|--------------|-------------|--------------|-------------|
| Mrpl45 67036         | -1.059091077 | 0.324892468 | -1.20670922  | 0.046274423 |
| lk 24010             | -1.059127076 | 0.32161168  | -1.022497465 | 0.363484746 |
| Tspan31 67125        | -1.059142302 | 0.270732774 | -1.123529054 | 0.094036092 |
| Pat1 225929          | -1.05914967  | 0.381044747 | -1.188602591 | 0.125777445 |
| Taok1 216965         | -1.059162085 | 0.401882981 | 1.116149603  | 0.224402439 |
| Als2cl 235633        | -1.059196307 | 0.33868448  | 1.040177558  | 0.364237761 |
| 2700049A03Rik 76967  | -1.059244155 | 0.46086859  | 1.185286783  | 0.400930459 |
| Dstyk 213452         | -1.05935437  | 0.368280384 | 1.153980378  | 0.08859516  |
| Hand2 15111          | -1.059358916 | 0.293928836 | -1.059358916 | 0.293928836 |
| Iars2 381314         | -1.059492048 | 0.239139392 | -1.158039297 | 0.016352731 |
| Rnps1 19826          | -1.059502483 | 0.30476788  | -1.059502483 | 0.30476788  |
| Il16 16170           | -1.059513231 | 0.396902484 | -1.120635701 | 0.310465202 |
| Fam96a 68250         | -1.059539587 | 0.236840719 | -1.029116004 | 0.361797504 |
| Fth1 14319           | -1.059540012 | 0.29839925  | -1.144034878 | 0.045444812 |
| Ccdc50 67501         | -1.059567938 | 0.390961526 | 1.199876333  | 0.113001539 |
| Brap 72399           | -1.05957712  | 0.292263955 | -1.017030627 | 0.438335764 |
| Ppp6r3 52036         | -1.059634853 | 0.280783641 | -1.059634853 | 0.280783641 |
| Zfp167 382118        | -1.059653338 | 0.469589216 | 1.216561098  | 0.370645645 |
| Tfcp2 21422          | -1.059656272 | 0.386509888 | 1.207749976  | 0.060082406 |
| Letmd1 68614         | -1.059661437 | 0.331332249 | 1.095706898  | 0.172064076 |
| Tnfsf13b 24099       | -1.059698432 | 0.468900983 | -2.349388889 | 0.152090257 |
| Klhdc4 234825        | -1.05976361  | 0.379463858 | -1.152785952 | 0.238761521 |
| Cog2 76332           | -1.059791078 | 0.359279099 | 1.118732692  | 0.195948506 |
| Setd3 52690          | -1.059906065 | 0.200656361 | -1.117146658 | 0.026662636 |
| Vps4b 20479          | -1.059907979 | 0.389745302 | -1.021564235 | 0.446876183 |
| Bccip 66165          | -1.060063381 | 0.249320005 | -1.115886682 | 0.092570295 |
| Gm13251 433791       | -1.060091765 | 0.478912219 | -2.76078     | 0.173296754 |
| Crip3 114570         | -1.060108391 | 0.468545088 | 1.859246314  | 0.224452502 |
| 1110038D17Rik 68778  | -1.060124933 | 0.314362853 | 1.081596209  | 0.167607088 |
| Lrrc20 216011        | -1.060144427 | 0.430498083 | -1.365029376 | 0.165279158 |
| Cdo1 12583           | -1.060172391 | 0.236554953 | -1.107184142 | 0.104606008 |
| Ubb 22187            | -1.060271617 | 0.350792165 | -1.118513878 | 0.248662911 |
| Pard6b 58220         | -1.060277195 | 0.420409689 | -1.008977297 | 0.485398802 |
| Hsf1 15499           | -1.060323943 | 0.272933053 | -1.043109217 | 0.305594034 |
| 2810408M09Rik 381406 | -1.0603355   | 0.322492223 | -1.112678022 | 0.200704982 |
| Ap2a1 11771          | -1.060336762 | 0.30154962  | -1.063916692 | 0.230533076 |
| Ptprk 19272          | -1.060369935 | 0.369629731 | -1.060369935 | 0.369629731 |
| C2cd3 277939         | -1.060373845 | 0.397170796 | 1.210130945  | 0.139077005 |
| Clcc1 229725         | -1.06040547  | 0.252029788 | -1.06040547  | 0.252029788 |
| Mlph 171531          | -1.060406035 | 0.415652102 | 1.086420167  | 0.363787417 |
| Fhl3 14201           | -1.060417705 | 0.457101344 | 1.391127896  | 0.283048041 |
| Gyg 27357            | -1.060431027 | 0.421169853 | -1.480378671 | 0.050405516 |
| Gm527 217648         | -1.060476119 | 0.465840342 | -1.825845924 | 0.2234056   |
| Slc39a7 14977        | -1.060516489 | 0.307661418 | 1.016025677  | 0.437605532 |
| Rrp1 18114           | -1.060538787 | 0.328322582 | -1.012047266 | 0.464075149 |
| 2700050L05Rik 214764 | -1.060542108 | 0.369931421 | -1.278956084 | 0.056597356 |
| Lztf1 93730          | -1.060545472 | 0.414563886 | -1.060545472 | 0.414563886 |
| Plekhm1 353047       | -1.060563816 | 0.315608941 | -1.212773676 | 0.020167887 |
| Jagn1 67767          | -1.060650181 | 0.286024358 | 1.001256516  | 0.494384066 |
| Agxt2l2 72947        | -1.060674742 | 0.274401713 | -1.060674742 | 0.274401713 |
| Tfdp1 21781          | -1.060749602 | 0.413922107 | -1.060749602 | 0.413922107 |
| Gm5506 433182        | -1.060755215 | 0.291229391 | -1.039204357 | 0.315925838 |
| Bivm 246229          | -1.06082568  | 0.450247667 | 1.421271659  | 0.206216878 |

|                         |              |             |              |             |
|-------------------------|--------------|-------------|--------------|-------------|
| LOC100048884 100048884  | -1.060837091 | 0.449059083 | 1.318251823  | 0.274662359 |
| Ankrd13b 268445         | -1.060864749 | 0.421255401 | -1.36420822  | 0.115172095 |
| Otub1 107260            | -1.060901265 | 0.371636934 | -1.060901265 | 0.371636934 |
| Prpf8 192159            | -1.060905767 | 0.138909123 | -1.039031722 | 0.239078902 |
| Tpp1 12751              | -1.06092756  | 0.257095014 | -1.145679097 | 0.020847763 |
| Elmod2 244548           | -1.06097693  | 0.415542672 | -1.311046678 | 0.145426956 |
| Pqbp1 54633             | -1.060996331 | 0.270817876 | -1.036959261 | 0.361758231 |
| Xkr6 219149             | -1.061009994 | 0.462433669 | 1.400397676  | 0.317642215 |
| Axin1 12005             | -1.061033851 | 0.194602585 | -1.039334884 | 0.231585818 |
| Vipr1 22354             | -1.061096435 | 0.251939736 | -1.017701094 | 0.419637419 |
| Phf2 18676              | -1.061107712 | 0.403870287 | -1.005802143 | 0.489184589 |
| Mrps6 121022            | -1.061129468 | 0.391566384 | -1.061129468 | 0.391566384 |
| Adssl1 11565            | -1.061130096 | 0.317698335 | -1.061130096 | 0.317698335 |
| Nlrp3 216799            | -1.061134297 | 0.45695867  | 1.507589768  | 0.222833067 |
| Lrrc3 237387            | -1.061190601 | 0.191141009 | -1.061190601 | 0.191141009 |
| Ft3 14255               | -1.061229715 | 0.466849126 | -1.827587288 | 0.237280066 |
| Dda1 66498              | -1.061234741 | 0.194969446 | -1.047155409 | 0.18031207  |
| Crip1 12925             | -1.061261667 | 0.447823571 | -1.611788948 | 0.128549377 |
| Uggt1 320011            | -1.061285263 | 0.334871764 | -1.061791392 | 0.298702989 |
| Cecr5 214932            | -1.061364156 | 0.248793769 | -1.017247954 | 0.420130376 |
| Mapk9 26420             | -1.061392444 | 0.354129233 | -1.257005456 | 0.050307203 |
| Eif2c4 76850            | -1.061405001 | 0.443394456 | -1.362311823 | 0.246752633 |
| Cggbp1 106143           | -1.061428561 | 0.327342658 | -1.061428561 | 0.327342658 |
| Taf8 63856              | -1.061433303 | 0.394893716 | 1.046417991  | 0.421895932 |
| Stxbp2 20911            | -1.061492739 | 0.278144334 | -1.121647516 | 0.127389748 |
| Sel1l3 231238           | -1.061503144 | 0.386134981 | -1.225698191 | 0.145449973 |
| Pla2g16 225845          | -1.061527772 | 0.358979748 | 1.048650362  | 0.372959989 |
| Ccdc80 67896            | -1.061551008 | 0.271722164 | -1.139521914 | 0.063566993 |
| Zfp414 328801           | -1.0615571   | 0.37770558  | -1.0615571   | 0.37770558  |
| Fam100b 319370          | -1.061604293 | 0.325384543 | -1.058810981 | 0.355344198 |
| Clp1 98985              | -1.061667259 | 0.406892168 | -1.061667259 | 0.406892168 |
| Xrcc1 22594             | -1.06169478  | 0.326674673 | -1.06169478  | 0.326674673 |
| Pitpnb 56305            | -1.061709373 | 0.260667872 | -1.061709373 | 0.260667872 |
| 5430411K18Rik 100502841 | -1.061809943 | 0.434707409 | -1.061809943 | 0.434707409 |
| Mpp1 17524              | -1.062001368 | 0.347606689 | 1.151920947  | 0.015984049 |
| Fam120c 207375          | -1.062060519 | 0.422132948 | -1.30236472  | 0.194481755 |
| Cplx2 12890             | -1.062075914 | 0.312542954 | -1.056600192 | 0.276764565 |
| Tcf25 66855             | -1.062140464 | 0.133162335 | -1.044241672 | 0.137738637 |
| Lama1 16772             | -1.062148213 | 0.446476716 | -1.27160003  | 0.276447384 |
| Dgcr6 13353             | -1.062228177 | 0.383415559 | 1.108977104  | 0.249650028 |
| Cttn 13043              | -1.062245267 | 0.320393939 | -1.061690428 | 0.314700885 |
| Sh3bp5l 79566           | -1.062311276 | 0.299470001 | -1.062311276 | 0.299470001 |
| Hpn 15451               | -1.062318287 | 0.243790967 | -1.062318287 | 0.243790967 |
| Las1 76130              | -1.062329013 | 0.257946314 | -1.111597723 | 0.132721039 |
| Pdcd4 18569             | -1.062379255 | 0.204602823 | 1.011130631  | 0.423168904 |
| Slc29a1 63959           | -1.062398251 | 0.305705808 | -1.062398251 | 0.305705808 |
| Ide 15925               | -1.062451721 | 0.285949439 | -1.062451721 | 0.285949439 |
| Sfi1 78887              | -1.062537804 | 0.347463042 | 1.034909003  | 0.391846455 |
| Tmem38a 74166           | -1.062587094 | 0.386205127 | -1.164133345 | 0.220875401 |
| Gm6907 628705           | -1.062598948 | 0.45497877  | 1.087130534  | 0.426277191 |
| Golt1a 68338            | -1.062601457 | 0.327859462 | -1.116661215 | 0.225343989 |
| Arf1 11840              | -1.062615567 | 0.253861925 | -1.007405643 | 0.462420649 |
| Scrn2 217140            | -1.062741316 | 0.3730716   | -1.200480545 | 0.155543982 |

|                     |              |             |              |             |
|---------------------|--------------|-------------|--------------|-------------|
| Ablim1 226251       | -1.062743628 | 0.331456688 | 1.011851584  | 0.462487372 |
| Gcnt4 218476        | -1.062756634 | 0.435192947 | -1.062756634 | 0.435192947 |
| Vps37a 52348        | -1.062766945 | 0.434730863 | 1.106206276  | 0.349721482 |
| Zfp207 22680        | -1.062882187 | 0.391778954 | -1.0361044   | 0.394455542 |
| Ggps1 14593         | -1.062920087 | 0.426251015 | -1.234559858 | 0.235208288 |
| Scrib 105782        | -1.06294829  | 0.23900056  | -1.123200008 | 0.049355127 |
| Reep3 28193         | -1.063078051 | 0.344126724 | -1.165799011 | 0.150641952 |
| Tk2 57813           | -1.063120818 | 0.276137715 | -1.145733619 | 0.029308682 |
| Mrps18c 68735       | -1.063133549 | 0.36240913  | -1.122342192 | 0.258385137 |
| Cwc27 67285         | -1.06313845  | 0.345086921 | -1.213774687 | 0.047699943 |
| Slmap 83997         | -1.063163395 | 0.420821162 | 1.368276479  | 0.050807732 |
| Edf1 59022          | -1.063173982 | 0.367691468 | -1.177594569 | 0.184888364 |
| Habp4 56541         | -1.063206887 | 0.258560033 | -1.063206887 | 0.258560033 |
| Flnb 286940         | -1.063224794 | 0.230347741 | -1.049239403 | 0.230106648 |
| Rprd2 75137         | -1.063285071 | 0.36549758  | -1.038420802 | 0.354550603 |
| Mrps26 99045        | -1.063291901 | 0.362372126 | 1.012755195  | 0.469701857 |
| Gas2 14453          | -1.063361268 | 0.384011667 | -1.063361268 | 0.384011667 |
| Rhbd12 230726       | -1.06336538  | 0.38573672  | -1.06336538  | 0.38573672  |
| Dctn4 67665         | -1.063377547 | 0.325720492 | -1.081829116 | 0.2342399   |
| Kif9 16578          | -1.063469835 | 0.457069171 | 1.310268853  | 0.335902723 |
| Nadsyn1 78914       | -1.063491653 | 0.341514201 | 1.00659246   | 0.482822163 |
| Tars2 71807         | -1.063636979 | 0.328671818 | 1.024392126  | 0.415300335 |
| Lta4h 16993         | -1.063677291 | 0.343284256 | 1.09823069   | 0.195460637 |
| Sdhc 66052          | -1.063682826 | 0.153695037 | -1.05696063  | 0.112014916 |
| Arfgap2 77038       | -1.06368566  | 0.160027951 | -1.110566583 | 0.028381468 |
| Cables2 252966      | -1.063711576 | 0.355718327 | -1.173067816 | 0.166937726 |
| 5133401N09Rik 75731 | -1.063732054 | 0.362813862 | -1.223439731 | 0.086732358 |
| Gnl3l 237107        | -1.063759476 | 0.39768614  | 1.086283068  | 0.287713458 |
| Sec24a 77371        | -1.063780728 | 0.392565707 | 1.232292523  | 0.083888827 |
| Slu7 193116         | -1.063808356 | 0.292536211 | -1.020820289 | 0.430562588 |
| Brms1l 52592        | -1.063820762 | 0.430869188 | 1.4277651    | 0.085984859 |
| Uba52 22186         | -1.063867268 | 0.391291851 | -1.221150439 | 0.185193243 |
| BC053749 333193     | -1.063907682 | 0.407512191 | -1.248671116 | 0.204297273 |
| Pepd 18624          | -1.063975668 | 0.306954603 | -1.063975668 | 0.306954603 |
| Stxbp1 20910        | -1.063997838 | 0.402604158 | 1.046495844  | 0.423655999 |
| Dld 13382           | -1.064049682 | 0.268158433 | -1.104735464 | 0.163424368 |
| Glce 93683          | -1.064059356 | 0.398051413 | 1.10774016   | 0.317941828 |
| Homer1 26556        | -1.064162277 | 0.434760774 | 1.121579257  | 0.364669254 |
| Cd38 12494          | -1.064172777 | 0.224707936 | -1.116394228 | 0.083521642 |
| Zeb1 21417          | -1.064190954 | 0.425208418 | 1.077864705  | 0.367603618 |
| Ctf1 13019          | -1.064209838 | 0.326565004 | -1.090596458 | 0.203256832 |
| Sorbs2 234214       | -1.064234045 | 0.390147211 | -1.064234045 | 0.390147211 |
| Itga3 16400         | -1.06427016  | 0.351816441 | -1.06427016  | 0.351816441 |
| Rab22a 19334        | -1.06430954  | 0.304908981 | -1.06430954  | 0.304908981 |
| Adarb1 110532       | -1.064323845 | 0.389313011 | -1.185672052 | 0.195968316 |
| Ccl6 20305          | -1.064407301 | 0.359553814 | 1.064707307  | 0.29576868  |
| Gnat1 14685         | -1.064411458 | 0.407530987 | -1.276189942 | 0.174278896 |
| Cc2d1b 319965       | -1.064492928 | 0.331934633 | -1.018794248 | 0.451843984 |
| Tbc1d2b 67016       | -1.06453399  | 0.308145989 | -1.06453399  | 0.308145989 |
| Colec12 140792      | -1.064593452 | 0.359654638 | -1.119915903 | 0.205267336 |
| Glyctk 235582       | -1.064613708 | 0.091904485 | -1.064613708 | 0.091904485 |
| Rras 20130          | -1.064628316 | 0.177111969 | -1.097822998 | 0.079604431 |
| Gnl2 230737         | -1.064653665 | 0.334066647 | -1.134371729 | 0.206424258 |

|                      |              |             |              |             |
|----------------------|--------------|-------------|--------------|-------------|
| Maml2 270118         | -1.064712418 | 0.42719873  | -1.064712418 | 0.42719873  |
| Btbd6 399566         | -1.064726777 | 0.290722716 | -1.135233639 | 0.101486242 |
| Trim25 217069        | -1.064766342 | 0.342651676 | 1.117870005  | 0.1586771   |
| Gemin4 276919        | -1.064767404 | 0.35298285  | -1.13731407  | 0.214851347 |
| Fbxo6 50762          | -1.064775961 | 0.313813723 | 1.017222238  | 0.441069311 |
| Dctn6 22428          | -1.064904927 | 0.259604671 | -1.011085967 | 0.452029495 |
| Diexf 215193         | -1.06496139  | 0.310458224 | -1.06496139  | 0.310458224 |
| Erlec1 66753         | -1.065002406 | 0.364932411 | 1.043125384  | 0.403716627 |
| Palm 18483           | -1.065069586 | 0.439502421 | 1.098774323  | 0.380227946 |
| Zrsr1 22183          | -1.065101056 | 0.374666653 | -1.118286952 | 0.294443011 |
| 2410015M20Rik 224904 | -1.065222578 | 0.305015811 | -1.111948112 | 0.104170848 |
| Tmem38b 52076        | -1.065290682 | 0.257376817 | -1.144063832 | 0.0225482   |
| Zfand2b 68818        | -1.065335061 | 0.369126232 | -1.199517245 | 0.162195824 |
| Pigk 329777          | -1.065348414 | 0.253816158 | -1.007542667 | 0.464998159 |
| Polr1a 20019         | -1.065435124 | 0.300791338 | 1.001345663  | 0.495031816 |
| Eps8l2 98845         | -1.065445725 | 0.285018197 | -1.016678133 | 0.416077453 |
| Cpne8 66871          | -1.065501737 | 0.417538656 | -1.026943819 | 0.463499936 |
| Uso1 56041           | -1.065545256 | 0.328537704 | 1.020802608  | 0.431711007 |
| Dnttip1 76233        | -1.065616752 | 0.336143183 | 1.093128882  | 0.229492606 |
| Ocr1 320634          | -1.065637753 | 0.424779751 | 1.076478314  | 0.406737669 |
| Arrb2 216869         | -1.065663511 | 0.331517374 | -1.013648248 | 0.465008522 |
| Hax1 23897           | -1.065740304 | 0.280164598 | 1.01009756   | 0.45545491  |
| Cstb 13014           | -1.065771362 | 0.343045432 | -1.211373781 | 0.06780594  |
| Gcap14 72972         | -1.065820199 | 0.296074193 | -1.112723189 | 0.105042085 |
| Cep164 214552        | -1.065821978 | 0.379300541 | 1.111968169  | 0.242868777 |
| Sox13 20668          | -1.065850689 | 0.328710368 | -1.065850689 | 0.328710368 |
| Stat3 20848          | -1.065859175 | 0.243830074 | -1.065859175 | 0.243830074 |
| Ubc 22190            | -1.06588766  | 0.37346771  | -1.06588766  | 0.37346771  |
| Mx2 17858            | -1.065904698 | 0.417976796 | -1.065904698 | 0.417976796 |
| Tmem111 66087        | -1.065962426 | 0.217479916 | -1.051631603 | 0.172296827 |
| Mrpl14 68463         | -1.065963243 | 0.387906109 | -1.134944235 | 0.194052354 |
| Ptgs1 19224          | -1.0659948   | 0.31715071  | -1.0659948   | 0.31715071  |
| Sypl 19027           | -1.066073654 | 0.284554132 | 1.069106121  | 0.174033872 |
| Tmem218 66279        | -1.06607667  | 0.403189027 | -1.067085755 | 0.315870351 |
| Zc3h8 57432          | -1.066101653 | 0.438196294 | -1.717616038 | 0.070672082 |
| Tle1 21885           | -1.066135114 | 0.321464776 | -1.066135114 | 0.321464776 |
| Anapc1 17222         | -1.066155837 | 0.301892611 | -1.066155837 | 0.301892611 |
| Anks1 224650         | -1.066248774 | 0.361111924 | -1.066248774 | 0.361111924 |
| Slco2a1 24059        | -1.066332138 | 0.350138981 | -1.073627614 | 0.285930564 |
| Ulk1 22241           | -1.066373991 | 0.325541423 | -1.02893772  | 0.358100269 |
| Recq15 170472        | -1.0663961   | 0.342977587 | -1.076965941 | 0.281336103 |
| C130074G19Rik 226777 | -1.066404264 | 0.199644718 | -1.01964486  | 0.381675526 |
| Rit1 19769           | -1.066410194 | 0.333165757 | -1.066410194 | 0.333165757 |
| 4831440E17Rik 320965 | -1.066429736 | 0.445738176 | -1.497742744 | 0.208788028 |
| Srp9 27058           | -1.066456355 | 0.294644164 | -1.171455803 | 0.052831759 |
| Myzap 102371         | -1.066473724 | 0.45442757  | -1.795267073 | 0.153502328 |
| Etfhdh 66841         | -1.066505499 | 0.37260353  | 1.177150542  | 0.127843479 |
| Serp1 28146          | -1.066512716 | 0.348409929 | -1.054011368 | 0.306202838 |
| Zcchc17 619605       | -1.066520059 | 0.327374448 | -1.077894976 | 0.231203248 |
| Esd 13885            | -1.066575488 | 0.308353657 | 1.024672062  | 0.408711619 |
| Dctn2 69654          | -1.066579403 | 0.257162393 | -1.098233894 | 0.191677431 |
| Gcfc1 67367          | -1.066655109 | 0.394331551 | -1.216035127 | 0.216241936 |
| Phf1 21652           | -1.06665828  | 0.337782795 | -1.282382071 | 0.012907382 |



|                      |              |             |              |             |
|----------------------|--------------|-------------|--------------|-------------|
| Cdk5rap2 214444      | -1.066704289 | 0.394253874 | -1.037120726 | 0.41234903  |
| Tec 21682            | -1.066823865 | 0.330462422 | -1.140142901 | 0.17462796  |
| Trappc4 60409        | -1.066835913 | 0.280583989 | -1.134851992 | 0.125959215 |
| Usp30 100756         | -1.066844576 | 0.341166299 | -1.283420665 | 0.020188741 |
| E2f5 13559           | -1.066875663 | 0.354531093 | -1.066875663 | 0.354531093 |
| AK010878 100233175   | -1.066939802 | 0.294382995 | -1.084970149 | 0.124909965 |
| Rdh5 19682           | -1.066943208 | 0.388494258 | -1.294163732 | 0.087036484 |
| Gltpd2 216871        | -1.066978047 | 0.343674688 | -1.163197614 | 0.177498193 |
| Phpt1 75454          | -1.066983048 | 0.352512781 | -1.150048915 | 0.079990222 |
| Ptpn12 19248         | -1.066984041 | 0.444965098 | -1.114804833 | 0.410602489 |
| Arl6ip4 65105        | -1.066988768 | 0.368413094 | -1.177671308 | 0.206367418 |
| G6pc3 68401          | -1.066992557 | 0.30698694  | -1.140011148 | 0.131272767 |
| Mdfj 17240           | -1.067021148 | 0.449237688 | -1.067021148 | 0.449237688 |
| Rnf126 70294         | -1.067021419 | 0.313228713 | 1.009426328  | 0.467645758 |
| Aadat 23923          | -1.067121633 | 0.284566771 | -1.1286167   | 0.128247726 |
| C1ra 50909           | -1.067172953 | 0.126807778 | -1.067172953 | 0.126807778 |
| Ndfip2 76273         | -1.067173659 | 0.195212142 | -1.067173659 | 0.195212142 |
| 2510003E04Rik 72320  | -1.067203849 | 0.350506777 | -1.067203849 | 0.350506777 |
| Dexi 58239           | -1.067216869 | 0.347264209 | -1.191868779 | 0.129969119 |
| Shank3 58234         | -1.067223585 | 0.35235453  | -1.203878591 | 0.119616676 |
| Trnt1 70047          | -1.067243958 | 0.404884913 | -1.474987689 | 0.029298839 |
| Kpna2 16647          | -1.067253775 | 0.3659178   | 1.044752452  | 0.39152566  |
| Mgat1 17308          | -1.067274112 | 0.25979643  | -1.05355955  | 0.255087258 |
| Pear1 73182          | -1.067275531 | 0.217956496 | -1.062618306 | 0.197782023 |
| Sergef 27414         | -1.067342623 | 0.408294157 | -1.05406157  | 0.399138385 |
| Mapkapk5 17165       | -1.067456433 | 0.301726179 | 1.086314329  | 0.155076331 |
| Peli2 93834          | -1.067510369 | 0.378955933 | 1.178377493  | 0.166289612 |
| Fam84b 399603        | -1.067521407 | 0.419001574 | 1.018395077  | 0.470346219 |
| Nicn1 66257          | -1.067640008 | 0.362341912 | 1.059788196  | 0.336717716 |
| Dis3l 213550         | -1.067687015 | 0.33848629  | -1.177522296 | 0.14098774  |
| E430025E21Rik 223593 | -1.067692967 | 0.345156217 | 1.022727635  | 0.443853053 |
| Lcat 16816           | -1.067731732 | 0.288741662 | -1.220356203 | 0.015478075 |
| Yif1b 77254          | -1.06783555  | 0.351631165 | -1.090270117 | 0.254630146 |
| Prrc2a 53761         | -1.067837487 | 0.168169049 | -1.067837487 | 0.168169049 |
| Acadm 11364          | -1.067851068 | 0.34015707  | -1.067851068 | 0.34015707  |
| Auh 11992            | -1.067913336 | 0.24609568  | -1.131513262 | 0.063889935 |
| Eif2b1 209354        | -1.06791361  | 0.313324232 | -1.131699269 | 0.192359887 |
| Phf19 74016          | -1.067920409 | 0.451621845 | -1.263536548 | 0.350430504 |
| Ift52 245866         | -1.067959236 | 0.310111043 | -1.178146012 | 0.078156591 |
| Btd 26363            | -1.067969159 | 0.158820317 | -1.153013849 | 0.00315476  |
| Klhl7 52323          | -1.067982568 | 0.403694455 | -1.275225326 | 0.181465346 |
| Sav1 64010           | -1.068008135 | 0.408175508 | 1.265938244  | 0.161687291 |
| Pm20d2 242377        | -1.068053842 | 0.452423697 | -1.101640999 | 0.415350534 |
| Cops2 12848          | -1.068080415 | 0.301003848 | -1.221521954 | 0.035299663 |
| Phf14 75725          | -1.068207518 | 0.294703339 | 1.073317453  | 0.211022633 |
| Anks6 75691          | -1.068214984 | 0.454887509 | -1.145341761 | 0.404553878 |
| H2-Q10 15007         | -1.068238273 | 0.297059728 | -1.239960635 | 0.001986039 |
| Tmem98 103743        | -1.068264741 | 0.354807678 | -1.21620946  | 0.109761258 |
| Rfesd 218341         | -1.068280592 | 0.417150295 | -1.141106368 | 0.286854611 |
| Git1 216963          | -1.068337003 | 0.280929466 | -1.003942467 | 0.481839198 |
| Arl1 104303          | -1.068379187 | 0.42934881  | 1.041242192  | 0.448606294 |
| Zmym4 67785          | -1.06840208  | 0.430474139 | -1.06840208  | 0.430474139 |
| Cdk16 18555          | -1.068414346 | 0.282327441 | -1.068414346 | 0.282327441 |

|                      |              |             |              |             |
|----------------------|--------------|-------------|--------------|-------------|
| Ap1p2 11804          | -1.068463245 | 0.242717653 | -1.14133838  | 0.060006368 |
| Ppp4r1l-ps 100043911 | -1.068485592 | 0.381133627 | 1.179142718  | 0.181794119 |
| Apbb2 11787          | -1.068512324 | 0.357002758 | 1.002204883  | 0.49538661  |
| Zfp87 170763         | -1.068571756 | 0.430785193 | -1.068571756 | 0.430785193 |
| Casp8 12370          | -1.068582439 | 0.300527637 | 1.016742911  | 0.439016456 |
| Pih1d1 68845         | -1.068713085 | 0.361616999 | -1.064738297 | 0.336015195 |
| Fam69a 67266         | -1.068736586 | 0.332516193 | -1.162936262 | 0.128793144 |
| lfnar2 15976         | -1.068751302 | 0.248386311 | -1.137354591 | 0.053224116 |
| Prkce 18754          | -1.068835874 | 0.336038952 | -1.068835874 | 0.336038952 |
| Gp49a 14727          | -1.068847892 | 0.421152553 | -1.068847892 | 0.421152553 |
| Mrps31 57312         | -1.069194395 | 0.248413947 | -1.031122433 | 0.254727723 |
| Nup153 218210        | -1.069197052 | 0.413519851 | 1.239258237  | 0.155178153 |
| Rhbdd3 279766        | -1.069206341 | 0.369456299 | -1.3800991   | 0.004067878 |
| Hus1 15574           | -1.069284111 | 0.444229451 | -1.277145337 | 0.289011056 |
| Aptx 66408           | -1.069408376 | 0.342235565 | -1.069408376 | 0.342235565 |
| 2210404J11Rik 381062 | -1.069515738 | 0.412985012 | 1.137710023  | 0.33080503  |
| Eef2k 13631          | -1.069630125 | 0.407147632 | 1.17689821   | 0.242881669 |
| Aurka 20878          | -1.069661502 | 0.418195082 | -1.001078265 | 0.498569733 |
| Cd3d 12500           | -1.069723633 | 0.449672574 | -1.069723633 | 0.449672574 |
| Heyl 56198           | -1.069736491 | 0.449166887 | 1.2299902    | 0.328866652 |
| Usp1 230484          | -1.069763463 | 0.41515579  | -1.281592792 | 0.154280835 |
| Mul1 68350           | -1.06978764  | 0.214870311 | -1.040563876 | 0.324283771 |
| Plekhb1 27276        | -1.069820167 | 0.346279771 | -1.047965007 | 0.376325206 |
| Hif1a 15251          | -1.069883409 | 0.387251889 | -1.214342149 | 0.213626066 |
| Snx5 69178           | -1.069946369 | 0.287375503 | 1.058512864  | 0.280521367 |
| Pld1 18805           | -1.070016823 | 0.454135391 | -1.023441799 | 0.485499707 |
| lpo13 230673         | -1.070076037 | 0.299359327 | -1.031431748 | 0.411197242 |
| Idua 15932           | -1.070135813 | 0.293055399 | -1.168638716 | 0.081334528 |
| P2rx7 18439          | -1.070146537 | 0.361090496 | 1.026684817  | 0.445234834 |
| Oat 18242            | -1.070150561 | 0.408753381 | -1.070150561 | 0.408753381 |
| lpo4 75751           | -1.070211095 | 0.243684562 | -1.128333958 | 0.085720583 |
| Arhgap24 231532      | -1.070242319 | 0.375988608 | -1.207147199 | 0.195178618 |
| Thop1 50492          | -1.070307035 | 0.336435059 | -1.056934421 | 0.235382307 |
| Sh3bp5 24056         | -1.070315124 | 0.389550941 | 1.217292428  | 0.154308124 |
| lpo9 226432          | -1.070343877 | 0.260972246 | 1.067081456  | 0.097512646 |
| Slc34a2 20531        | -1.070479304 | 0.437276061 | -1.258499518 | 0.282973751 |
| Dolk 227697          | -1.070492589 | 0.321629264 | -1.070492589 | 0.321629264 |
| Nrbp2 223649         | -1.070656884 | 0.092031283 | -1.07090979  | 0.058886369 |
| Pfkl 18641           | -1.070671919 | 0.338508403 | -1.045341054 | 0.353295735 |
| Capg 12332           | -1.070702973 | 0.432314237 | -1.158008145 | 0.261588295 |
| Gimap1 16205         | -1.070727323 | 0.356390946 | -1.070727323 | 0.356390946 |
| Ppp1r35 69871        | -1.070736722 | 0.407035879 | -1.070736722 | 0.407035879 |
| Gfap 14580           | -1.070767805 | 0.464464284 | -1.966634453 | 0.201402532 |
| Mrps22 64655         | -1.070768162 | 0.308407956 | -1.157235043 | 0.10691948  |
| 4933424B01Rik 71177  | -1.070861612 | 0.357859898 | 1.06726755   | 0.305824504 |
| 0610011L14Rik 68295  | -1.070908569 | 0.258487582 | -1.020705782 | 0.422321341 |
| Men1 17283           | -1.07105803  | 0.259868678 | -1.135661727 | 0.115372313 |
| Nadk 192185          | -1.071060925 | 0.26384902  | 1.059573717  | 0.204320471 |
| D230025D16Rik 234678 | -1.071110928 | 0.326942765 | -1.053466004 | 0.267358367 |
| Nfkb1a 18035         | -1.071142096 | 0.330845616 | 1.067908331  | 0.250667111 |
| Fancf 100040608      | -1.071236149 | 0.421826896 | -1.071236149 | 0.421826896 |
| Ctsa 19025           | -1.071422396 | 0.231979228 | -1.116232623 | 0.132160756 |
| Tmem50a 71817        | -1.071448513 | 0.365667219 | -1.173702477 | 0.104569132 |

|                     |              |             |              |             |
|---------------------|--------------|-------------|--------------|-------------|
| H47 109815          | -1.071519007 | 0.290247638 | 1.012210634  | 0.454701924 |
| Sart3 53890         | -1.071663365 | 0.335340436 | -1.099379195 | 0.2278106   |
| Ubr3 68795          | -1.07167738  | 0.36027137  | -1.012054653 | 0.469240704 |
| Xpc 22591           | -1.071694229 | 0.355797179 | -1.148989055 | 0.191743763 |
| Rnmt1 67390         | -1.071735546 | 0.344399322 | -1.038174189 | 0.396506134 |
| Fmn1 14260          | -1.071806008 | 0.438059497 | 1.23113892   | 0.326990727 |
| Mrpl30 107734       | -1.071936211 | 0.32686119  | 1.000159748  | 0.49956405  |
| Rdbp 27632          | -1.071954157 | 0.319182732 | -1.002544677 | 0.491629201 |
| Whsc2 24116         | -1.071975869 | 0.383127873 | -1.174626247 | 0.237686673 |
| Slc38a6 625098      | -1.072056396 | 0.346659963 | -1.072056396 | 0.346659963 |
| Armc5 233912        | -1.072086785 | 0.283362971 | -1.162605277 | 0.09044619  |
| Pi4kb 107650        | -1.072114623 | 0.301518441 | -1.165496969 | 0.077669614 |
| Pvrl1 58235         | -1.072200418 | 0.088887211 | -1.053595828 | 0.043130415 |
| 9430016H08Rik 68115 | -1.072336184 | 0.261073188 | -1.136322486 | 0.098060083 |
| Tmem17 103765       | -1.072359947 | 0.443023209 | 1.108702251  | 0.410869475 |
| Ckb 12709           | -1.072392384 | 0.423943646 | -1.378368507 | 0.122809445 |
| Dos 100503659       | -1.072411819 | 0.371843224 | -1.072411819 | 0.371843224 |
| Ncbp2 68092         | -1.072420064 | 0.304302146 | -1.126241492 | 0.194179212 |
| Hnrnpf 98758        | -1.072472858 | 0.30427419  | 1.082512591  | 0.218278421 |
| Kcnc3 16504         | -1.072474512 | 0.259229504 | -1.114857114 | 0.162160689 |
| D1Bwg0212e 52846    | -1.072514072 | 0.344590618 | 1.037711029  | 0.408803004 |
| Ccdc55 237859       | -1.072759062 | 0.330176404 | -1.1622734   | 0.180908939 |
| Zmat5 67178         | -1.072775999 | 0.364320957 | 1.117751187  | 0.181283466 |
| Pgpep1 66522        | -1.072776129 | 0.187323926 | 1.021786559  | 0.329770698 |
| Ltbr 17000          | -1.072798046 | 0.29639878  | -1.15879397  | 0.092083382 |
| Lzts2 226154        | -1.072816865 | 0.311144282 | 1.003604736  | 0.488785148 |
| Zyg11b 414872       | -1.072820575 | 0.311126664 | -1.081790852 | 0.134942509 |
| Nt5m 103850         | -1.072820846 | 0.397216453 | -1.244295568 | 0.218869107 |
| Unc45a 101869       | -1.073139172 | 0.289433561 | -1.164131581 | 0.103651189 |
| Fbxl20 72194        | -1.073266827 | 0.249300998 | -1.002667691 | 0.487816217 |
| Gnb2 14693          | -1.07331654  | 0.33340704  | -1.032138516 | 0.405175639 |
| Slc22a7 108114      | -1.07338744  | 0.346392806 | -1.125549797 | 0.210983225 |
| 9130401M01Rik 75758 | -1.073409661 | 0.334265887 | -1.294959474 | 0.028656031 |
| Elovl2 54326        | -1.073541075 | 0.355866638 | 1.047039465  | 0.398193915 |
| Xylt2 217119        | -1.073600011 | 0.225787006 | -1.002931668 | 0.483386471 |
| Ears2 67417         | -1.073605286 | 0.357305007 | -1.073605286 | 0.357305007 |
| 9430038I01Rik 77252 | -1.073702973 | 0.397798807 | -1.167552185 | 0.277547313 |
| Nfib 18028          | -1.073712417 | 0.268924038 | 1.010957719  | 0.451832202 |
| Fam160b1 226252     | -1.073780173 | 0.339296542 | -1.073780173 | 0.339296542 |
| Ppp2r5b 225849      | -1.073852642 | 0.314550585 | -1.132170018 | 0.153941477 |
| Rwdd1 66521         | -1.073886819 | 0.346638406 | -1.073886819 | 0.346638406 |
| Cdk5rap3 80280      | -1.073890587 | 0.361971363 | -1.005689177 | 0.488881543 |
| Pmm2 54128          | -1.073898202 | 0.25418568  | -1.121159668 | 0.158658297 |
| Ncln 103425         | -1.073939278 | 0.27034551  | -1.073939278 | 0.27034551  |
| Mrps16 66242        | -1.073942214 | 0.320167585 | -1.073942214 | 0.320167585 |
| Ctdsp1 227292       | -1.073969233 | 0.279795655 | -1.168500107 | 0.081222754 |
| Anxa6 11749         | -1.074007974 | 0.256837282 | -1.148099419 | 0.094556374 |
| Prkci 18759         | -1.074023322 | 0.3942362   | -1.105472011 | 0.334718389 |
| Zmpste24 230709     | -1.074137135 | 0.209113599 | 1.019212974  | 0.39313549  |
| Hnrnpa3 229279      | -1.074152428 | 0.214212912 | -1.113504105 | 0.117771148 |
| Maged1 94275        | -1.074169127 | 0.227778592 | -1.074169127 | 0.227778592 |
| Mettl7b 71664       | -1.074198026 | 0.361252558 | -1.091766801 | 0.258144319 |
| P2rx4 18438         | -1.074259586 | 0.309116744 | -1.225797926 | 0.019986468 |

|                      |              |             |              |             |
|----------------------|--------------|-------------|--------------|-------------|
| Pigb 55981           | -1.074302537 | 0.41254541  | -1.14405374  | 0.33413305  |
| Sf3b4 107701         | -1.074309649 | 0.304693647 | -1.074309649 | 0.304693647 |
| Fbxo36 66153         | -1.074397168 | 0.330464673 | -1.303557346 | 0.017972039 |
| Nipa2 93790          | -1.074487533 | 0.404424868 | -1.037170215 | 0.432670478 |
| Ehd3 57440           | -1.074504888 | 0.381948357 | -1.011636037 | 0.47153785  |
| Cpb2 56373           | -1.07451869  | 0.260605779 | -1.128039516 | 0.134894151 |
| Gnmt 14711           | -1.074661962 | 0.367884039 | -1.390850566 | 0.019416365 |
| Tmem110 69179        | -1.074664568 | 0.333715984 | -1.017151457 | 0.460054107 |
| A530032D15Rik 381287 | -1.07470019  | 0.467233076 | -3.88109794  | 0.096090833 |
| Tmod3 50875          | -1.074863521 | 0.343036741 | -1.074863521 | 0.343036741 |
| Ppat 231327          | -1.074871466 | 0.3506876   | 1.108137789  | 0.146520116 |
| Pik3cd 18707         | -1.075020049 | 0.354236505 | -1.267554856 | 0.063734645 |
| 4931408A02Rik 70967  | -1.075021836 | 0.444292296 | 1.047065153  | 0.467580986 |
| Slc2a8 56017         | -1.075137572 | 0.294275193 | -1.046374989 | 0.378357553 |
| Kdm4b 193796         | -1.075262239 | 0.21326589  | -1.10628405  | 0.144542057 |
| Tpi1 21991           | -1.075262335 | 0.235811913 | -1.189216772 | 0.0307713   |
| Npnt 114249          | -1.075308235 | 0.451688564 | 1.018517157  | 0.482800486 |
| Dpp4 13482           | -1.075332099 | 0.255499484 | -1.016257403 | 0.436098262 |
| Tshz3 243931         | -1.075374215 | 0.463807336 | 1.002806537  | 0.498817668 |
| Fam53c 66306         | -1.075432107 | 0.417350468 | 1.073112027  | 0.391637025 |
| 0610010K14Rik 104457 | -1.075495003 | 0.304588651 | -1.021223416 | 0.419761835 |
| Alg3 208624          | -1.075566887 | 0.311527532 | -1.075566887 | 0.311527532 |
| Pdzk1 59020          | -1.07563969  | 0.242171782 | -1.07563969  | 0.242171782 |
| Sh3d19 27059         | -1.07565622  | 0.335061246 | 1.14706076   | 0.08959885  |
| Rassf7 66985         | -1.075685473 | 0.242989291 | -1.138115961 | 0.085436491 |
| Sfxn1 14057          | -1.07582686  | 0.061171461 | -1.063104089 | 0.052183607 |
| Srp68 217337         | -1.075856505 | 0.251587007 | 1.057124888  | 0.20527949  |
| Obfc2b 69917         | -1.075926987 | 0.264948379 | -1.075926987 | 0.264948379 |
| Dhx30 72831          | -1.075957797 | 0.29741249  | 1.006147296  | 0.48073829  |
| Nudt5 53893          | -1.075978101 | 0.377403257 | -1.298705158 | 0.101586647 |
| Fads6 328035         | -1.075993101 | 0.3618539   | 1.070032899  | 0.354661388 |
| Gpatch1 67471        | -1.076064451 | 0.28358863  | -1.076064451 | 0.28358863  |
| Noc3l 57753          | -1.076155021 | 0.267952247 | -1.011280754 | 0.460291722 |
| Tceb2 67673          | -1.076174741 | 0.356889651 | -1.076174741 | 0.356889651 |
| Ikbkap 230233        | -1.076222306 | 0.313333397 | -1.197000597 | 0.06901806  |
| Pex11a 18631         | -1.076230541 | 0.39120832  | 1.251277539  | 0.136283106 |
| Mettl1 17299         | -1.076235652 | 0.365885386 | -1.002284015 | 0.495765625 |
| Arl5a 75423          | -1.076305337 | 0.200528437 | -1.039578723 | 0.326086671 |
| BC027231 212547      | -1.076306935 | 0.379254508 | -1.243793833 | 0.118377047 |
| Fam120a 218236       | -1.076329545 | 0.352727332 | 1.004034222  | 0.490032508 |
| Rnf185 193670        | -1.076365238 | 0.212364119 | -1.076365238 | 0.212364119 |
| Arcn1 213827         | -1.076394853 | 0.3514437   | 1.060013328  | 0.363400894 |
| Tgtp2 100039796      | -1.076556606 | 0.396678631 | -1.346630785 | 0.071744788 |
| Keap1 50868          | -1.076581079 | 0.133830308 | -1.110677681 | 0.063068398 |
| Bcas3 192197         | -1.076649425 | 0.228852009 | -1.076649425 | 0.228852009 |
| Ctss 13040           | -1.076670508 | 0.327782812 | -1.036772897 | 0.420916658 |
| Nbeal2 235627        | -1.076676305 | 0.400581657 | 1.136814873  | 0.241989793 |
| 1520402A15Rik 68075  | -1.076716048 | 0.469823981 | -2.8202      | 0.173296754 |
| Fam54b 76824         | -1.076735089 | 0.131643089 | -1.076735089 | 0.131643089 |
| B4galt2 53418        | -1.076794679 | 0.464802687 | 1.061455911  | 0.478986093 |
| Enoph1 67870         | -1.076840469 | 0.410256856 | -1.18256212  | 0.284769934 |
| 0610037L13Rik 74098  | -1.077004642 | 0.324728725 | -1.077004642 | 0.324728725 |
| Tmco3 234076         | -1.077055877 | 0.406887396 | 1.038649784  | 0.450730076 |

|                      |              |             |              |             |
|----------------------|--------------|-------------|--------------|-------------|
| BC021614 225884      | -1.077106617 | 0.404846728 | -1.035823911 | 0.444066115 |
| Lifr 16880           | -1.077126748 | 0.296219978 | -1.026801906 | 0.424957986 |
| Anapc11 66156        | -1.077195473 | 0.381214496 | -1.327114127 | 0.086303052 |
| Slc20a2 20516        | -1.077218796 | 0.32433539  | 1.010511553  | 0.473778155 |
| Plvap 84094          | -1.077235529 | 0.207167539 | -1.066267157 | 0.168339533 |
| Lxn 17035            | -1.077293126 | 0.458081413 | 1.00700148   | 0.495959403 |
| Pitrm1 69617         | -1.077324157 | 0.354069346 | 1.031601207  | 0.436775995 |
| Ube4a 140630         | -1.077383216 | 0.314720787 | 1.050729494  | 0.322355172 |
| Man2a2 140481        | -1.077433392 | 0.384582934 | 1.029061385  | 0.405851387 |
| Dcp1b 319618         | -1.077445128 | 0.410495508 | -1.285653294 | 0.140427904 |
| Chmp5 76959          | -1.077524658 | 0.315810284 | -1.072020196 | 0.318834605 |
| Rad23a 19358         | -1.077557104 | 0.280822296 | 1.000330678  | 0.498874317 |
| Csk 12988            | -1.07760483  | 0.163289078 | -1.13626853  | 0.03069316  |
| Iigp1 60440          | -1.077715858 | 0.261237535 | 1.049233047  | 0.300063291 |
| Lrfrn3 233067        | -1.077719107 | 0.334286738 | 1.008665765  | 0.478617363 |
| Klf15 66277          | -1.07773313  | 0.255938258 | -1.07773313  | 0.255938258 |
| Ppp4r4 74521         | -1.077772954 | 0.439686431 | 1.325653603  | 0.28688103  |
| Epb4.111 13821       | -1.07778595  | 0.386083206 | -1.07778595  | 0.386083206 |
| Sap30 60406          | -1.07781735  | 0.391181185 | 1.061267229  | 0.401904008 |
| Mre11a 17535         | -1.077871286 | 0.368115783 | 1.047285771  | 0.416506358 |
| Snape4 227644        | -1.077919369 | 0.273193189 | -1.015583958 | 0.449569079 |
| Zfp27 22689          | -1.077921014 | 0.378078112 | -1.194699618 | 0.216298054 |
| Kdelr1 68137         | -1.077922546 | 0.212187487 | -1.039991179 | 0.336849749 |
| Bin3 57784           | -1.077945402 | 0.260107415 | -1.222399128 | 0.019846921 |
| L3mbtl2 214669       | -1.078140631 | 0.318912601 | -1.297473476 | 0.01850696  |
| Josd1 74158          | -1.078246342 | 0.235421696 | -1.027570672 | 0.391279987 |
| Stx5a 56389          | -1.078265    | 0.327788746 | -1.165716105 | 0.193984335 |
| Hip1r 29816          | -1.078278069 | 0.344741354 | -1.289362392 | 0.025224556 |
| Pak4 70584           | -1.078299624 | 0.252316051 | -1.227544102 | 0.00400343  |
| Slc25a25 227731      | -1.078304181 | 0.382859089 | -1.199885076 | 0.221136987 |
| Pnpo 103711          | -1.078306433 | 0.171828065 | -1.032314309 | 0.329247283 |
| Mreg 381269          | -1.078342442 | 0.339108866 | -1.036555666 | 0.425878506 |
| Ugcg 22234           | -1.078360574 | 0.367109003 | 1.070851617  | 0.367722559 |
| Impact 16210         | -1.078363515 | 0.399032861 | -1.231133776 | 0.258234939 |
| Rgp1 242406          | -1.078472323 | 0.243933935 | 1.042987823  | 0.29870294  |
| 4930481A15Rik 74931  | -1.078490223 | 0.295212611 | -1.092924296 | 0.284806255 |
| BC017643 217370      | -1.078606412 | 0.344386887 | -1.199053714 | 0.126982793 |
| Nfrkb 235134         | -1.078638007 | 0.349609236 | 1.050926761  | 0.370546784 |
| Vps26b 69091         | -1.078649318 | 0.337370725 | -1.069081771 | 0.283194656 |
| Sox17 20671          | -1.078827434 | 0.453959937 | -2.134697578 | 0.13622783  |
| Acsf3 257633         | -1.078899217 | 0.208213134 | -1.146673231 | 0.033644698 |
| Slc31a1 20529        | -1.078908128 | 0.2336845   | -1.078908128 | 0.2336845   |
| Rbbp5 213464         | -1.078921341 | 0.385493784 | 1.066334202  | 0.403206455 |
| Usp24 329908         | -1.078995881 | 0.11970591  | -1.078995881 | 0.11970591  |
| Dock1 330662         | -1.079016041 | 0.405760476 | 1.017465012  | 0.461313034 |
| Aif1 11629           | -1.079030184 | 0.427897771 | -1.709579765 | 0.042093515 |
| D5Erttd579e 320661   | -1.079068685 | 0.358907459 | -1.079068685 | 0.358907459 |
| Ier3ip1 66191        | -1.079104909 | 0.30542353  | -1.003893265 | 0.489528117 |
| Mtap 66902           | -1.079229919 | 0.298619447 | 1.086487072  | 0.214236755 |
| Kng2 385643          | -1.079235988 | 0.37117417  | -1.456790262 | 0.006226903 |
| Hnrnp1 59013         | -1.079238591 | 0.390485402 | 1.042526509  | 0.435265857 |
| Dnlz 52838           | -1.079295648 | 0.239694476 | 1.000661652  | 0.496539698 |
| C630004H02Rik 217310 | -1.079307596 | 0.422876931 | -1.59995082  | 0.071262155 |

|                  |              |             |              |             |
|------------------|--------------|-------------|--------------|-------------|
| Cndp2 66054      | -1.079374281 | 0.237648623 | -1.090657694 | 0.085855277 |
| Tmem106b 71900   | -1.079382048 | 0.342729046 | 1.164703589  | 0.083959654 |
| Rapgef1 268480   | -1.079383975 | 0.433925966 | -1.925811615 | 0.040327091 |
| Tnfrsf1a 21937   | -1.079401717 | 0.221411073 | -1.197211657 | 0.022909174 |
| Spcs3 76687      | -1.079460063 | 0.30236896  | -1.193969217 | 0.098087223 |
| Plekhf1 72287    | -1.079542942 | 0.408734213 | -1.443427494 | 0.104461532 |
| Proca1 216974    | -1.079554237 | 0.419390298 | 1.281115753  | 0.211157723 |
| Tspan8 216350    | -1.079558923 | 0.434510776 | 1.061079825  | 0.455192656 |
| Hist1h2ah 319168 | -1.079572729 | 0.410650695 | 1.088250046  | 0.407134578 |
| Prkaca 18747     | -1.07958816  | 0.193909297 | -1.084802338 | 0.134883582 |
| Plip 67801       | -1.079704481 | 0.191521059 | -1.01895868  | 0.39545319  |
| Herc1 235439     | -1.079861873 | 0.394998328 | 1.037204428  | 0.426966906 |
| Sec61a1 53421    | -1.079863312 | 0.303173596 | -1.16946608  | 0.150683586 |
| Opa3 403187      | -1.079917809 | 0.335618791 | 1.033108785  | 0.422719031 |
| Rtn4ip1 170728   | -1.079922956 | 0.290674537 | 1.103758939  | 0.08237023  |
| Apoa5 66113      | -1.080011613 | 0.312203401 | -1.080011613 | 0.312203401 |
| Rcn3 52377       | -1.080015788 | 0.402014545 | -1.161703935 | 0.23093227  |
| Arhgdia 192662   | -1.080021199 | 0.23516021  | -1.04477927  | 0.344327317 |
| Ddx49 234374     | -1.080053083 | 0.271884167 | 1.002110803  | 0.492404854 |
| Sfr1 67788       | -1.08014532  | 0.337791765 | 1.011133891  | 0.476167842 |
| Trappc5 66682    | -1.080164276 | 0.251999206 | -1.130596339 | 0.158880924 |
| Plekha5 109135   | -1.080197781 | 0.383299681 | 1.244735028  | 0.128307553 |
| Opa1 74143       | -1.080234836 | 0.342362791 | 1.028689475  | 0.388749496 |
| Trmu 72026       | -1.080249697 | 0.382670114 | -1.296296254 | 0.14841193  |
| Gtf2i 14886      | -1.080312466 | 0.144394281 | -1.093468761 | 0.01669769  |
| Ctxn1 330695     | -1.080334666 | 0.452982175 | -1.057297582 | 0.464839941 |
| Arap3 106952     | -1.080345476 | 0.242923374 | 1.032996933  | 0.338589743 |
| Catsper2 212670  | -1.080388057 | 0.381686995 | 1.06082889   | 0.394139241 |
| Zbtb2 381990     | -1.080509791 | 0.334915806 | 1.119586293  | 0.212997045 |
| Snx13 217463     | -1.08059149  | 0.348631714 | -1.032676481 | 0.419079888 |
| Nubp2 26426      | -1.080625296 | 0.153939083 | -1.080625296 | 0.153939083 |
| Atp5b 11947      | -1.08067395  | 0.112192705 | -1.157007959 | 0.005354957 |
| Ptplb 70757      | -1.080793063 | 0.296360519 | -1.186865353 | 0.108126063 |
| Ptprg 19270      | -1.080816625 | 0.358222633 | 1.049784662  | 0.405482057 |
| Fam136a 66488    | -1.08086386  | 0.343627805 | 1.159439515  | 0.129015551 |
| Cnnm3 94218      | -1.080872645 | 0.262321885 | -1.157360878 | 0.115246202 |
| Ccdc23 69216     | -1.08102341  | 0.337473835 | -1.238564395 | 0.102528924 |
| Ccdc59 52713     | -1.081056815 | 0.285304708 | 1.008253918  | 0.470186275 |
| Ube2o 217342     | -1.08110676  | 0.298481672 | -1.08110676  | 0.298481672 |
| Akr1b7 11997     | -1.081175266 | 0.435998827 | -1.088491797 | 0.418275187 |
| Zfp839 72805     | -1.081216156 | 0.227337291 | -1.01654246  | 0.429601837 |
| Slc12a4 20498    | -1.08125218  | 0.286868238 | -1.25731316  | 0.023593623 |
| Fam134c 67998    | -1.081286116 | 0.131636089 | -1.081286116 | 0.131636089 |
| Mpdu1 24070      | -1.081428571 | 0.279221797 | -1.081428571 | 0.279221797 |
| Gtf2ird1 57080   | -1.081437968 | 0.310089511 | -1.081437968 | 0.310089511 |
| Ii4ra 16190      | -1.081448358 | 0.175413825 | -1.137583358 | 0.036734623 |
| Snrnp70 20637    | -1.081475774 | 0.307741207 | -1.081475774 | 0.307741207 |
| Kidins220 77480  | -1.081486917 | 0.3189613   | -1.081486917 | 0.3189613   |
| Actr2 66713      | -1.081545369 | 0.291437858 | 1.029242676  | 0.393703466 |
| Fto 26383        | -1.081561723 | 0.282041891 | -1.081561723 | 0.282041891 |
| Tm4sf1 17112     | -1.081649464 | 0.354522266 | -1.190489237 | 0.185110031 |
| Adprh 11544      | -1.081729581 | 0.319476212 | 1.114023431  | 0.189244749 |
| Chrac1 93696     | -1.081782625 | 0.234389774 | -1.081782625 | 0.234389774 |

|                      |              |             |              |             |
|----------------------|--------------|-------------|--------------|-------------|
| Bloc1s3 232946       | -1.081803438 | 0.360362573 | -1.081803438 | 0.360362573 |
| Scarb1 20778         | -1.081808186 | 0.214546862 | -1.041424329 | 0.279948927 |
| Adora1 11539         | -1.081836873 | 0.305501929 | -1.072675431 | 0.297341105 |
| Tfpt 69714           | -1.081945515 | 0.311775    | -1.281023153 | 0.026840731 |
| Zfp764 233893        | -1.082071253 | 0.394007973 | -1.104343674 | 0.274690718 |
| Trim2 80890          | -1.082087525 | 0.414736511 | 1.178691013  | 0.322955699 |
| Pole 18973           | -1.08223087  | 0.416755144 | 1.112824819  | 0.394912474 |
| Epha1 13835          | -1.08227193  | 0.244225207 | -1.218651524 | 0.027796728 |
| Deb1 26901           | -1.082313163 | 0.332191534 | -1.082313163 | 0.332191534 |
| Ppm1g 14208          | -1.082328293 | 0.238223294 | -1.13046363  | 0.150180518 |
| 2310035C23Rik 227446 | -1.082369743 | 0.368581718 | -1.207726632 | 0.226733592 |
| 2810021J22Rik 69944  | -1.082411263 | 0.42965291  | -1.082411263 | 0.42965291  |
| Rhou 69581           | -1.082433266 | 0.307155779 | -1.178649234 | 0.151526004 |
| Cdc42ep2 104252      | -1.082436828 | 0.372110266 | -1.284467102 | 0.140215507 |
| BC003331 226499      | -1.082464202 | 0.27608055  | -1.02779826  | 0.420897708 |
| Tnip2 231130         | -1.082465771 | 0.399206314 | 1.063616692  | 0.42563155  |
| Atg5 11793           | -1.082482458 | 0.174453175 | -1.082482458 | 0.174453175 |
| Fibp 58249           | -1.082516644 | 0.316739913 | -1.028296085 | 0.394953781 |
| Apobr 171504         | -1.082557087 | 0.319235835 | 1.101074049  | 0.231085602 |
| Dqx1 93838           | -1.082624009 | 0.226431739 | -1.170327863 | 0.044310974 |
| Uba7 74153           | -1.082724286 | 0.31452788  | -1.017259873 | 0.460368584 |
| Ccdc104 216618       | -1.082725521 | 0.357076464 | 1.056403885  | 0.373360914 |
| Uba5 66663           | -1.082736398 | 0.33501745  | -1.166413282 | 0.198004502 |
| Srek1 218543         | -1.082747524 | 0.287008161 | -1.082747524 | 0.287008161 |
| Kcnj8 16523          | -1.082767932 | 0.403148988 | 1.060238463  | 0.433359256 |
| Sec13 110379         | -1.082820985 | 0.241021835 | 1.045809896  | 0.2897558   |
| Pura 19290           | -1.08290501  | 0.332704286 | -1.196813996 | 0.170012668 |
| Mir1895 100316832    | -1.083012072 | 0.449045492 | 1.745770261  | 0.163534591 |
| Trim7 94089          | -1.083048609 | 0.335654064 | -1.172513873 | 0.18806829  |
| Nme6 54369           | -1.083057891 | 0.368766594 | 1.19183052   | 0.180471439 |
| Mrpl52 68836         | -1.083060948 | 0.383160493 | -1.348574254 | 0.105058156 |
| Whamm 434204         | -1.083178198 | 0.230677995 | -1.222741663 | 0.012977541 |
| Srprb 20818          | -1.083258719 | 0.327028332 | 1.036037467  | 0.411261452 |
| Acot9 56360          | -1.083278059 | 0.450777208 | 1.601926307  | 0.243606372 |
| Adh5 11532           | -1.083285215 | 0.179102723 | -1.133204803 | 0.061065396 |
| 1300001I01Rik 74148  | -1.083332645 | 0.052145545 | -1.089407727 | 0.012780007 |
| Stbd1 52331          | -1.083382194 | 0.220469989 | -1.1470298   | 0.069924    |
| Gtf2h5 66467         | -1.083545079 | 0.266314463 | -1.219045199 | 0.03035603  |
| Bola3 78653          | -1.083549292 | 0.18007787  | -1.124453118 | 0.101892674 |
| Fam83f 213956        | -1.083588804 | 0.435909268 | -1.083588804 | 0.435909268 |
| Rbm41 237073         | -1.083652867 | 0.450503588 | -1.197779736 | 0.394899452 |
| Gm1821 218963        | -1.083686007 | 0.292803196 | -1.175748048 | 0.102917726 |
| Itih1 16424          | -1.083877361 | 0.263695414 | -1.097978922 | 0.185184352 |
| Camta1 100072        | -1.083886854 | 0.392381992 | -1.358832471 | 0.134854897 |
| Pdhhb 68263          | -1.083933845 | 0.291113754 | 1.104164994  | 0.094555023 |
| Vamp2 22318          | -1.083967595 | 0.26489602  | -1.11456947  | 0.111143879 |
| Fcho2 218503         | -1.084115578 | 0.423320278 | 1.338966517  | 0.197701065 |
| Preb 50907           | -1.084174556 | 0.078885169 | -1.084174556 | 0.078885169 |
| Zfp503 218820        | -1.084195784 | 0.447004179 | -1.991464949 | 0.134641892 |
| Ddx47 67755          | -1.084257279 | 0.135073636 | -1.112401701 | 0.080222298 |
| Rasa2 114713         | -1.084294821 | 0.407017783 | -1.084294821 | 0.407017783 |
| Gch1 14528           | -1.084381598 | 0.232795913 | -1.020434301 | 0.421792368 |
| Csrp2bp 228714       | -1.084454511 | 0.263565095 | -1.084454511 | 0.263565095 |

|                     |              |             |              |             |
|---------------------|--------------|-------------|--------------|-------------|
| Sephs1 109079       | -1.084456441 | 0.158849342 | -1.152504107 | 0.020460655 |
| Phrf1 101471        | -1.08449141  | 0.265414822 | 1.011030541  | 0.452081628 |
| Tmem56 99887        | -1.084505063 | 0.373005409 | 1.138731381  | 0.237367924 |
| Rmnd5b 66089        | -1.084569879 | 0.252222632 | -1.169944839 | 0.089828203 |
| BC048403 270802     | -1.08469983  | 0.436099976 | 1.489283152  | 0.177167238 |
| Parp9 80285         | -1.08473127  | 0.273677356 | -1.024956451 | 0.428776385 |
| Dapk3 13144         | -1.084756603 | 0.306511754 | -1.169305231 | 0.148947195 |
| Glyr1 74022         | -1.084812155 | 0.236614072 | -1.007997556 | 0.451422224 |
| Ewsr1 14030         | -1.084825067 | 0.132905033 | -1.11891253  | 0.072092657 |
| Prkacb 18749        | -1.084827427 | 0.325659974 | -1.169841329 | 0.207834444 |
| Dazap2 23994        | -1.084872373 | 0.293396031 | 1.018240577  | 0.443481693 |
| 2900005J15Rik 67261 | -1.08490679  | 0.343720207 | -1.044721593 | 0.419680809 |
| Ephb4 13846         | -1.084923381 | 0.199467793 | -1.011793913 | 0.430796068 |
| Phlda1 21664        | -1.084929023 | 0.343225075 | -1.084929023 | 0.343225075 |
| Minpp1 17330        | -1.084930368 | 0.151880156 | -1.084930368 | 0.151880156 |
| Ctnnal1 54366       | -1.084939991 | 0.421916064 | -1.084939991 | 0.421916064 |
| Prrc1 73137         | -1.084962347 | 0.165702656 | -1.022271256 | 0.356396171 |
| Tlr1 21897          | -1.084984844 | 0.446254984 | -1.575659799 | 0.257144871 |
| Cxcl11 56066        | -1.08508646  | 0.45846401  | 2.218072465  | 0.163883125 |
| Cd99l2 171486       | -1.08518152  | 0.310417939 | -1.178829942 | 0.135829469 |
| Gstm4 14865         | -1.085223229 | 0.229685383 | -1.149009685 | 0.08536234  |
| F630110N24Rik 73822 | -1.085230986 | 0.438052971 | -1.085230986 | 0.438052971 |
| Ypel5 383295        | -1.085261955 | 0.270315683 | -1.033142026 | 0.337832858 |
| Mapk1ip1 218975     | -1.085344796 | 0.394474521 | 1.118338927  | 0.279018681 |
| Lrrc32 434215       | -1.085347249 | 0.265143261 | -1.009398839 | 0.46707395  |
| Cyc1 66445          | -1.085364414 | 0.114646803 | -1.085364414 | 0.114646803 |
| Asb6 72323          | -1.085408166 | 0.247556868 | -1.085408166 | 0.247556868 |
| Cep152 99100        | -1.085470851 | 0.373694903 | 1.102314841  | 0.281562964 |
| Pias1 56469         | -1.085505731 | 0.29643824  | 1.081212403  | 0.24670558  |
| Svip 75744          | -1.085550301 | 0.369110802 | -1.318367062 | 0.104776133 |
| Txndc17 52700       | -1.085559295 | 0.289331669 | -1.274241694 | 0.028370514 |
| Pi4ka 224020        | -1.085584619 | 0.227862709 | -1.085584619 | 0.227862709 |
| Fbxo25 66822        | -1.085587301 | 0.37376688  | -1.000880293 | 0.498735624 |
| Arl8b 67166         | -1.085649848 | 0.22037192  | -1.085649848 | 0.22037192  |
| Arpc2 76709         | -1.085687163 | 0.030023326 | -1.0693836   | 0.06199197  |
| Hnrnpul2 68693      | -1.085744366 | 0.229727102 | 1.049813221  | 0.224967262 |
| Fhl1 14199          | -1.085833606 | 0.416157335 | 1.472526368  | 0.083750399 |
| Exoc3 211446        | -1.085844808 | 0.279477235 | -1.184860556 | 0.06742039  |
| Prpf31 68988        | -1.085953064 | 0.323633728 | 1.015764287  | 0.460092106 |
| Znrf1 170737        | -1.085984176 | 0.314761665 | -1.33209959  | 0.012117663 |
| Uxs1 67883          | -1.085989979 | 0.38148257  | -1.148189209 | 0.254108995 |
| Tle4 21888          | -1.086012985 | 0.370118307 | 1.228425618  | 0.123050274 |
| Paip2b 232164       | -1.086033414 | 0.3405637   | -1.204415702 | 0.146123041 |
| Gkap1 56278         | -1.086036979 | 0.35346107  | -1.086036979 | 0.35346107  |
| Nsmce2 68501        | -1.086049779 | 0.30282502  | -1.22111177  | 0.08231741  |
| Prune 229589        | -1.086097578 | 0.300651802 | -1.055194194 | 0.316081133 |
| Tmf1 232286         | -1.086129615 | 0.399407985 | -1.182763222 | 0.261217555 |
| Ptpn3 545622        | -1.086165521 | 0.321003893 | -1.086165521 | 0.321003893 |
| Kars 85305          | -1.086240018 | 0.186258742 | -1.0386039   | 0.334742608 |
| Zfp444 72667        | -1.086248428 | 0.290327814 | -1.283897058 | 0.019025622 |
| Cyth1 19157         | -1.086397257 | 0.28153937  | 1.060536992  | 0.290366742 |
| Araf 11836          | -1.086413363 | 0.15407751  | -1.190514464 | 0.003472365 |
| Adsl 11564          | -1.086447753 | 0.144013907 | -1.083746999 | 0.094645845 |



|                      |              |             |              |             |
|----------------------|--------------|-------------|--------------|-------------|
| Tasp1 75812          | -1.086497609 | 0.391835722 | -1.372109021 | 0.133507331 |
| Pycard 66824         | -1.086497672 | 0.438748222 | 1.015457402  | 0.488093642 |
| Ergic2 67456         | -1.086642169 | 0.282590793 | -1.006920402 | 0.478572678 |
| Gmpr2 105446         | -1.08664651  | 0.193983541 | -1.025669252 | 0.380648132 |
| Fam158a 85308        | -1.086649258 | 0.345193916 | -1.292063638 | 0.072430481 |
| Zglp1 100009600      | -1.086832941 | 0.468696171 | 1            | #DIV/0!     |
| Guf1 231279          | -1.086834329 | 0.33273743  | -1.011086151 | 0.476773286 |
| Smpd1 20597          | -1.086929253 | 0.161551797 | -1.135236161 | 0.069127567 |
| Stx2 13852           | -1.087028033 | 0.306254724 | 1.029320423  | 0.417300116 |
| D6Wsu163e 28040      | -1.087068119 | 0.369897258 | -1.087068119 | 0.369897258 |
| C030016D13Rik 107372 | -1.087118788 | 0.417726844 | -1.75881774  | 0.042552402 |
| Appb3 225372         | -1.08723485  | 0.221131115 | -1.217420482 | 0.020338848 |
| A930005H10Rik 68161  | -1.087283917 | 0.372983639 | -1.156891514 | 0.259513243 |
| Sorbs1 20411         | -1.087324734 | 0.411348615 | 1.24859331   | 0.244048466 |
| 0610031J06Rik 56700  | -1.087359687 | 0.284193158 | -1.15169209  | 0.184808728 |
| Akt1 11651           | -1.087386414 | 0.11910144  | -1.161445778 | 0.010528794 |
| Smek2 104570         | -1.087455141 | 0.387618942 | 1.09625975   | 0.276140048 |
| Cd302 66205          | -1.087458633 | 0.192977743 | -1.087458633 | 0.192977743 |
| Fbxo9 71538          | -1.087496579 | 0.259798827 | -1.011520861 | 0.462215561 |
| Neur14 216860        | -1.087506081 | 0.308489579 | 1.057230911  | 0.305971931 |
| Anubl1 67492         | -1.087669351 | 0.392120403 | -1.087669351 | 0.392120403 |
| Kng1 16644           | -1.087710007 | 0.35613218  | -1.448464099 | 0.010150592 |
| Baat 12012           | -1.08773898  | 0.142946955 | -1.043137013 | 0.27352011  |
| Sh2d7 244885         | -1.087857581 | 0.461706469 | 2.424107143  | 0.19229339  |
| Ifitm1 68713         | -1.087860872 | 0.328998266 | 1.047047472  | 0.368143437 |
| Dclre1b 140917       | -1.08797613  | 0.38946964  | -1.375978809 | 0.128248225 |
| Mapk3 26417          | -1.088015332 | 0.183264806 | -1.147285563 | 0.068520395 |
| Mettl14 210529       | -1.088051716 | 0.342169159 | -1.061562583 | 0.395401803 |
| Zc3h10 103284        | -1.088260227 | 0.297562999 | 1.01436562   | 0.455399455 |
| Dcun1d1 114893       | -1.088264751 | 0.1854887   | -1.147554818 | 0.050856396 |
| Eif2b5 224045        | -1.08827428  | 0.252473617 | -1.151905788 | 0.144222976 |
| Arrdc4 66412         | -1.088282409 | 0.373861955 | 1.091434061  | 0.359547135 |
| Cars2 71941          | -1.088309572 | 0.351945996 | 1.018479715  | 0.464409947 |
| Mrps34 79044         | -1.088365087 | 0.259180613 | -1.176158447 | 0.070208407 |
| 5033414D02Rik 67759  | -1.08837642  | 0.414859335 | -1.303598878 | 0.183686181 |
| Mterfd1 66410        | -1.088440133 | 0.329825119 | -1.088440133 | 0.329825119 |
| Txlna 109658         | -1.088456983 | 0.274569023 | 1.016169639  | 0.435606004 |
| Arhgef18 102098      | -1.08852837  | 0.256231137 | -1.101348962 | 0.154583241 |
| Deaf1 54006          | -1.088529414 | 0.234222519 | -1.043177809 | 0.298771594 |
| Myo1c 17913          | -1.088679507 | 0.133195249 | -1.097094337 | 0.082760577 |
| St13 70356           | -1.088739326 | 0.273745727 | 1.068015592  | 0.269695574 |
| Phf23 78246          | -1.088820264 | 0.159699474 | -1.04234464  | 0.301056981 |
| Ammecr1l 225339      | -1.088846825 | 0.410267738 | 1.409293009  | 0.125331171 |
| Ezr 22350            | -1.088862113 | 0.411103017 | -1.086553536 | 0.406596766 |
| Top2b 21974          | -1.088928325 | 0.290480654 | -1.088928325 | 0.290480654 |
| Krt19 16669          | -1.088939484 | 0.409147811 | 1.172402411  | 0.330887778 |
| Psmf1 228769         | -1.088946745 | 0.21813742  | -1.155742565 | 0.094111877 |
| Lrrc8d 231549        | -1.088958774 | 0.192645442 | -1.061081291 | 0.281435854 |
| Itga7 16404          | -1.089090883 | 0.346045465 | -1.089090883 | 0.346045465 |
| Ugt2b37 112417       | -1.089124367 | 0.411000428 | -1.089124367 | 0.411000428 |
| Mrvi1 17540          | -1.089138603 | 0.384003852 | 1.108520218  | 0.352721789 |
| Zfp949 71640         | -1.089178709 | 0.285290701 | -1.199662836 | 0.104221464 |
| Gnaq 14682           | -1.08919228  | 0.36802057  | 1.121331855  | 0.283883151 |

|                     |              |             |              |             |
|---------------------|--------------|-------------|--------------|-------------|
| Ttl13 269954        | -1.089264068 | 0.421949335 | -1.296188149 | 0.254837692 |
| Med8 80509          | -1.089318344 | 0.269933967 | -1.266139371 | 0.02693089  |
| Foxk2 68837         | -1.089370861 | 0.280450645 | -1.184313804 | 0.125682973 |
| Ubr7 66622          | -1.089500106 | 0.348455593 | 1.031431811  | 0.443408333 |
| Tsr2 69499          | -1.089507469 | 0.296264587 | -1.237901671 | 0.057907477 |
| Kif13a 16553        | -1.089553489 | 0.386292461 | -1.274025049 | 0.094083993 |
| 4933434E20Rik 99650 | -1.089610951 | 0.195319734 | -1.101060201 | 0.110197872 |
| Flad1 319945        | -1.08968682  | 0.195893948 | -1.044311046 | 0.327110052 |
| Prnp 19122          | -1.089775284 | 0.145367693 | -1.158140676 | 0.018066723 |
| Pan3 72587          | -1.089786662 | 0.347975159 | 1.195173259  | 0.091609929 |
| Ppm1a 19042         | -1.089800984 | 0.24092335  | -1.147483142 | 0.125139412 |
| Rlim 19820          | -1.089805126 | 0.270820239 | -1.293171996 | 0.005419948 |
| Sec61a2 57743       | -1.089925943 | 0.369317701 | -1.375636541 | 0.063260593 |
| Zdhhc6 66980        | -1.089940985 | 0.193122717 | -1.141797297 | 0.082018614 |
| Fip11l1 66899       | -1.089961075 | 0.231657182 | -1.028485256 | 0.401885995 |
| Pcyt2 68671         | -1.089965654 | 0.218776286 | -1.161239562 | 0.087131817 |
| Slc17a5 235504      | -1.089991928 | 0.315921951 | -1.334791133 | 0.025223938 |
| Zfp952 240067       | -1.090004078 | 0.366422267 | 1.09799833   | 0.285488131 |
| Dusp2 13537         | -1.090035563 | 0.421260295 | -1.264329518 | 0.278376604 |
| Stx4a 20909         | -1.090041055 | 0.245478977 | -1.090041055 | 0.245478977 |
| Pex12 103737        | -1.090052302 | 0.196317024 | -1.229122973 | 0.003532992 |
| Timp3 21859         | -1.090103027 | 0.426073286 | 1.24926645   | 0.319369515 |
| Pdcd2 18567         | -1.090129217 | 0.328177002 | 1.009095856  | 0.479439197 |
| Mfsd2a 76574        | -1.090134125 | 0.340591478 | -1.393339197 | 0.024190147 |
| Slc25a44 229517     | -1.09019543  | 0.176713069 | -1.029088172 | 0.352201506 |
| Fgd6 13998          | -1.090238078 | 0.354661995 | 1.065709437  | 0.381643965 |
| Man1a 17155         | -1.090239815 | 0.364546343 | -1.040284729 | 0.414451972 |
| Adcy5 224129        | -1.090319811 | 0.430873993 | 1.40854175   | 0.225429072 |
| Copg 54161          | -1.090364984 | 0.211682862 | -1.090364984 | 0.211682862 |
| Prps1 19139         | -1.090468792 | 0.301465203 | -1.090468792 | 0.301465203 |
| Plk1s1 228730       | -1.090500362 | 0.308541112 | -1.010395723 | 0.452474194 |
| Itih5 209378        | -1.090501135 | 0.40866678  | 1.278418122  | 0.201976736 |
| Grina 66168         | -1.090566971 | 0.213503514 | -1.090566971 | 0.213503514 |
| Blvrb 233016        | -1.090624578 | 0.321453424 | 1.067289331  | 0.309925482 |
| Maf 17132           | -1.090657102 | 0.401361348 | 1.081763805  | 0.332319548 |
| Ptp4a2 19244        | -1.090729689 | 0.100361951 | -1.090729689 | 0.100361951 |
| Efna1 13636         | -1.0907425   | 0.338451601 | 1.028663841  | 0.444338704 |
| Cyb5d2 192986       | -1.090747453 | 0.113024193 | -1.046843254 | 0.230237941 |
| Mios 252875         | -1.090761054 | 0.303504729 | 1.041323016  | 0.351744471 |
| Hpse 15442          | -1.090801166 | 0.370426379 | -1.111146496 | 0.310200675 |
| Ncam1 17967         | -1.090818036 | 0.43733707  | -1.218643176 | 0.374216389 |
| Ndufs1 227197       | -1.090825462 | 0.322257042 | 1.046442224  | 0.386316599 |
| Phkg2 68961         | -1.090852782 | 0.245850838 | -1.15437017  | 0.097217564 |
| Inca1 103844        | -1.090887806 | 0.312683962 | -1.022931483 | 0.433013789 |
| Diap1 13367         | -1.090907937 | 0.095460299 | -1.132408949 | 0.019733066 |
| Asap2 211914        | -1.090917998 | 0.387131857 | -1.090917998 | 0.387131857 |
| Wdtdc1 230796       | -1.090955629 | 0.27354174  | -1.183402027 | 0.123059562 |
| Nek7 59125          | -1.091311821 | 0.324560562 | 1.073614437  | 0.295146981 |
| Hnrnp3 432467       | -1.091352483 | 0.304469863 | -1.350454006 | 0.006371872 |
| Pde6d 18582         | -1.091401132 | 0.242529477 | -1.091401132 | 0.242529477 |
| Tgfb1 21810         | -1.091468714 | 0.255966211 | -1.091468714 | 0.255966211 |
| Bfar 67118          | -1.091517694 | 0.254146186 | -1.091517694 | 0.254146186 |
| Fam65a 75687        | -1.091571979 | 0.289502304 | 1.019913181  | 0.440516738 |

|                     |              |             |              |             |
|---------------------|--------------|-------------|--------------|-------------|
| Pgs1 74451          | -1.09157901  | 0.267743205 | 1.005881582  | 0.480328196 |
| Lrriq3 74435        | -1.091676    | 0.453698385 | 1.540949445  | 0.312650402 |
| Helz 78455          | -1.091695322 | 0.310826864 | -1.022110922 | 0.408815873 |
| Ctdnep1 67181       | -1.091739445 | 0.184446818 | -1.166313603 | 0.02009718  |
| Stk32c 57740        | -1.091805697 | 0.422108171 | 1.146619207  | 0.389158388 |
| Nedd4 17999         | -1.091847408 | 0.333272491 | 1.035651705  | 0.426767181 |
| 170002915Rik 75641  | -1.091860638 | 0.435262381 | -1.564840708 | 0.22849052  |
| Arid5a 214855       | -1.091893686 | 0.376311977 | -1.168348157 | 0.25708342  |
| Fance 72775         | -1.092121124 | 0.30245738  | -1.310338678 | 0.035863898 |
| 40970 224703        | -1.092174619 | 0.172340818 | -1.206987947 | 0.009919059 |
| Mrs2 380836         | -1.092202268 | 0.382825392 | 1.139326156  | 0.306545422 |
| Mutyh 70603         | -1.092281082 | 0.451060722 | -2.164615657 | 0.174610843 |
| Dph3 105638         | -1.092297434 | 0.278649367 | -1.287977997 | 0.018859941 |
| Rtp3 235636         | -1.092298715 | 0.242255328 | -1.164742631 | 0.119638022 |
| Der1 67819          | -1.092321422 | 0.135632562 | -1.092321422 | 0.135632562 |
| 6030458C11Rik 77877 | -1.092380008 | 0.277403277 | 1.004441874  | 0.485292988 |
| Nr0b2 23957         | -1.092439127 | 0.402071815 | -1.413674854 | 0.16683703  |
| Plxdc2 67448        | -1.092484625 | 0.448641026 | 1.051959991  | 0.465263252 |
| Ptch1 19206         | -1.092505206 | 0.413907719 | 1.349235054  | 0.157020309 |
| Naa10 56292         | -1.092564676 | 0.335215813 | -1.09119905  | 0.296794938 |
| Ssbp4 76900         | -1.092575818 | 0.351036559 | -1.092575818 | 0.351036559 |
| Slc22a18 18400      | -1.092599543 | 0.151508686 | -1.212692008 | 0.000232194 |
| Smc6 67241          | -1.092614991 | 0.162937275 | -1.045131683 | 0.302177065 |
| Pde4b 18578         | -1.092701854 | 0.396137047 | -1.091561373 | 0.371180448 |
| Sigirr 24058        | -1.092709901 | 0.373368946 | -1.39762286  | 0.0705658   |
| Dnaja3 83945        | -1.092728148 | 0.17861014  | 1.027409622  | 0.290953015 |
| Bbc3 170770         | -1.092739075 | 0.291854932 | -1.012173022 | 0.467814973 |
| Mast4 328329        | -1.092750314 | 0.386673247 | -1.092750314 | 0.386673247 |
| Ate1 11907          | -1.092752562 | 0.396571961 | -1.092752562 | 0.396571961 |
| Rps4y2 66184        | -1.092803527 | 0.343419835 | 1.159519574  | 0.195392738 |
| Klf9 16601          | -1.092813363 | 0.39753943  | 1.017886364  | 0.476625803 |
| Arid1b 239985       | -1.092887202 | 0.340058702 | -1.034522724 | 0.393997248 |
| Al987944 233168     | -1.092920389 | 0.324478663 | -1.092920389 | 0.324478663 |
| Gm4987 245405       | -1.092945806 | 0.419069587 | 1.317275296  | 0.237108226 |
| Ddx24 27225         | -1.092981118 | 0.113617039 | -1.057089759 | 0.212158436 |
| Numa1 101706        | -1.093018386 | 0.200085688 | -1.037072916 | 0.358833529 |
| Tlr6 21899          | -1.093037576 | 0.466232868 | 1            | #DIV/0!     |
| Elk3 13713          | -1.093066077 | 0.296927485 | 1.008265031  | 0.478739678 |
| Rragd 52187         | -1.093157669 | 0.416297446 | 1.122900305  | 0.399786921 |
| Hspa4 15525         | -1.093213963 | 0.067061634 | -1.158779103 | 0.002172534 |
| Zfp106 20402        | -1.093222275 | 0.225402532 | -1.102670673 | 0.167466162 |
| Oxsr1 108737        | -1.093235154 | 0.357755761 | 1.12974844   | 0.232433695 |
| Fxn 14297           | -1.093327001 | 0.315121223 | -1.250054722 | 0.095676225 |
| Ppp6r1 243819       | -1.093415546 | 0.101781818 | -1.045834557 | 0.210588551 |
| Apoc2 11813         | -1.093520149 | 0.356657993 | -1.294247406 | 0.136654619 |
| Uqcrc2 67003        | -1.093520638 | 0.147583241 | -1.136321372 | 0.037834612 |
| Fam129c 100037278   | -1.093559414 | 0.448099225 | -1.953378788 | 0.19862072  |
| Fam19a3 329731      | -1.093559414 | 0.448099225 | -1.953378788 | 0.19862072  |
| Cyp2c39 13098       | -1.093618681 | 0.366085708 | -1.093618681 | 0.366085708 |
| Ppap2a 19012        | -1.093635246 | 0.310559804 | 1.039179028  | 0.379751779 |
| Ccnt2 72949         | -1.093659537 | 0.372083159 | 1.151862293  | 0.243502198 |
| 2700097O09Rik 72658 | -1.09373591  | 0.399386337 | 1.316926827  | 0.18668664  |
| Sntg1 71096         | -1.093752051 | 0.46721525  | 1            | #DIV/0!     |

|                     |              |             |              |             |
|---------------------|--------------|-------------|--------------|-------------|
| Rbm42 68035         | -1.093861916 | 0.272604782 | -1.206893242 | 0.044871553 |
| Fez2 225020         | -1.093927712 | 0.268039657 | -1.286860296 | 0.019410829 |
| Prrg3 208748        | -1.093935354 | 0.408056982 | -1.219666534 | 0.282936538 |
| Etv6 14011          | -1.093993122 | 0.26975359  | -1.093993122 | 0.26975359  |
| Nme3 79059          | -1.094010756 | 0.276029694 | -1.209731597 | 0.091826101 |
| Mto1 68291          | -1.094104833 | 0.336253603 | -1.187554832 | 0.203311463 |
| Taf6 21343          | -1.094132494 | 0.187331637 | -1.160131463 | 0.046057726 |
| Brf1 72308          | -1.094170541 | 0.286601785 | -1.01496218  | 0.462810068 |
| Snrnp35 76167       | -1.094216575 | 0.302020317 | 1.021471451  | 0.44472463  |
| Pak1 18479          | -1.094223845 | 0.418354594 | 1.202353288  | 0.341082538 |
| Nod1 107607         | -1.09422856  | 0.33412252  | -1.166502479 | 0.253280883 |
| Tex261 21766        | -1.094299877 | 0.142575705 | -1.130031446 | 0.087330335 |
| Copb2 50797         | -1.094326265 | 0.174642402 | -1.072372264 | 0.107801989 |
| Agpat5 52123        | -1.094345117 | 0.350625017 | 1.094083496  | 0.315819953 |
| Gusb 110006         | -1.094376279 | 0.263894052 | -1.000975501 | 0.496886449 |
| Nt5c3l 68106        | -1.094378839 | 0.407859894 | -1.094378839 | 0.407859894 |
| Tead2 21677         | -1.094401743 | 0.400902727 | -1.094401743 | 0.400902727 |
| Havcr2 171285       | -1.094441607 | 0.427574072 | 1.088090611  | 0.427947013 |
| Nprl2 56032         | -1.094451706 | 0.301309018 | 1.117850748  | 0.164904585 |
| Dom3z 112403        | -1.094466548 | 0.318387425 | -1.135770598 | 0.231026046 |
| Dact3 629378        | -1.09454477  | 0.356133728 | 1.090563272  | 0.290638326 |
| Map2k1 26395        | -1.094577571 | 0.339561722 | 1.021059813  | 0.45712538  |
| Eif4g2 13690        | -1.094628184 | 0.363292411 | 1.222068462  | 0.149354767 |
| Tm9sf2 68059        | -1.094642953 | 0.309836756 | -1.215274758 | 0.144805459 |
| 1810020D17Rik 66273 | -1.094810808 | 0.316048489 | -1.094810808 | 0.316048489 |
| Cdkn2aipnl 52626    | -1.094965793 | 0.18739887  | -1.179919482 | 0.033578918 |
| Mlh3 217716         | -1.094966534 | 0.321097237 | 1.149212272  | 0.139764886 |
| Sh3rf1 59009        | -1.094970556 | 0.41239332  | -1.471459302 | 0.180932952 |
| Usp9x 22284         | -1.094999789 | 0.279973705 | -1.201781251 | 0.116578121 |
| Tnfrsf14 230979     | -1.095014221 | 0.438357603 | 1.3199245    | 0.248658046 |
| Qars 97541          | -1.09502312  | 0.22557467  | -1.09502312  | 0.22557467  |
| Pts 19286           | -1.095099863 | 0.20643971  | -1.152384871 | 0.110469051 |
| Gm14431 100303732   | -1.095119951 | 0.451092207 | -1.5378      | 0.167706141 |
| Mrpl44 69163        | -1.095183705 | 0.251372462 | 1.056528209  | 0.296444885 |
| Fzd7 14369          | -1.095345343 | 0.401297582 | -1.451036311 | 0.14915249  |
| Dhx29 218629        | -1.095352184 | 0.37455238  | 1.135506144  | 0.296673174 |
| Med19 381379        | -1.095353952 | 0.282866141 | -1.200605881 | 0.084323837 |
| Zfp706 68036        | -1.095364525 | 0.233239986 | -1.256878651 | 0.017232289 |
| Atp5f1 11950        | -1.095431774 | 0.151904542 | -1.178293856 | 0.009847096 |
| Mfn2 170731         | -1.095452047 | 0.303067506 | 1.123690837  | 0.157774541 |
| Bcap31 27061        | -1.095473958 | 0.030301007 | -1.095473958 | 0.030301007 |
| Pik3c3 225326       | -1.095516647 | 0.237966874 | -1.166825275 | 0.121836287 |
| Plxna2 18845        | -1.095528255 | 0.294621854 | 1.093925272  | 0.234044125 |
| Rtp4 67775          | -1.095646092 | 0.29163955  | -1.175156899 | 0.157368486 |
| Wdr44 72404         | -1.095664796 | 0.451439637 | -3.187161616 | 0.058355663 |
| 1810030O07Rik 69155 | -1.095842768 | 0.333765015 | -1.095842768 | 0.333765015 |
| Vps13b 666173       | -1.095844255 | 0.3919689   | -1.314530709 | 0.222424674 |
| Chmp3 66700         | -1.095856699 | 0.295268814 | -1.22472254  | 0.107935295 |
| Adck3 67426         | -1.095890085 | 0.170653974 | -1.124135688 | 0.052554514 |
| Fam50a 108160       | -1.09594734  | 0.266816547 | -1.174172527 | 0.122401503 |
| Fam169a 320557      | -1.095948477 | 0.453714834 | -1.122857175 | 0.457104283 |
| Ddx59 67997         | -1.095960879 | 0.391967399 | -1.095960879 | 0.391967399 |
| Gatsl2 80909        | -1.095981981 | 0.433934989 | 1.340895194  | 0.306899364 |

|                      |              |             |              |             |
|----------------------|--------------|-------------|--------------|-------------|
| Rasgrp3 240168       | -1.095988197 | 0.408421993 | -1.07973984  | 0.42022956  |
| Gm14420 628308       | -1.096041291 | 0.26687518  | -1.207481971 | 0.089674629 |
| Itm2b 16432          | -1.096098365 | 0.204179502 | -1.128306437 | 0.082449503 |
| Alg12 223774         | -1.096147652 | 0.252421458 | -1.096147652 | 0.252421458 |
| Fbxw4 30838          | -1.096202125 | 0.316105494 | -1.342833692 | 0.041460051 |
| Mzt2 72083           | -1.096222448 | 0.252524184 | -1.189565626 | 0.065529628 |
| Cyp2d10 13101        | -1.096235908 | 0.272721815 | 1.014482163  | 0.452954725 |
| Wdr55 67936          | -1.096390704 | 0.193608488 | -1.076320553 | 0.180733138 |
| Asgr2 11890          | -1.096418096 | 0.291215596 | -1.26558216  | 0.038846794 |
| Gm4498 100043523     | -1.096483333 | 0.170446566 | 1            | #DIV/0!     |
| Gm4141 100042976     | -1.096483333 | 0.170446566 | 1            | #DIV/0!     |
| Gm4201 100043061     | -1.096483333 | 0.170446566 | 1            | #DIV/0!     |
| Eif2s1 13665         | -1.096509493 | 0.213106712 | -1.186805366 | 0.054960954 |
| Ppp2r1a 51792        | -1.096513784 | 0.153696683 | -1.154741739 | 0.035306027 |
| Bmpr1a 12166         | -1.096939075 | 0.389310242 | -1.284003586 | 0.243202006 |
| Mat2a 232087         | -1.097064007 | 0.222713375 | -1.084423654 | 0.174601027 |
| Dnajc1 13418         | -1.097125691 | 0.122950736 | -1.163399748 | 0.015334217 |
| Derl2 116891         | -1.097160927 | 0.212259187 | 1.023860869  | 0.401627513 |
| Commd7 99311         | -1.097172173 | 0.246077623 | 1.001637467  | 0.493887675 |
| Apba3 57267          | -1.097396382 | 0.21663313  | -1.097396382 | 0.21663313  |
| Heatr5a 320487       | -1.09740753  | 0.386915637 | 1.18198059   | 0.265400664 |
| Tob2 57259           | -1.097415327 | 0.357977996 | -1.089451947 | 0.330037771 |
| Rab5a 271457         | -1.097550873 | 0.366770761 | -1.257788738 | 0.21642058  |
| C1qb 12260           | -1.097571124 | 0.277097143 | -1.20325055  | 0.119614719 |
| Gemin6 67242         | -1.097654385 | 0.412419184 | -1.502208192 | 0.173804243 |
| Tmcc2 68875          | -1.097735474 | 0.363287203 | 1.049585241  | 0.428311361 |
| Gtl3 14894           | -1.097745924 | 0.267521458 | -1.073298647 | 0.253464393 |
| Atpif1 11983         | -1.097786477 | 0.261808114 | -1.018114279 | 0.445606348 |
| Larp1 73158          | -1.097842079 | 0.264968861 | -1.17610584  | 0.149394356 |
| Fam172a 68675        | -1.097857199 | 0.418442077 | -1.441216015 | 0.231761713 |
| Yeats4 64050         | -1.097877292 | 0.202348019 | -1.034394589 | 0.367118686 |
| 1110054O05Rik 66209  | -1.097889663 | 0.373681073 | -1.510959448 | 0.053398815 |
| Snx7 76561           | -1.097927409 | 0.365030803 | 1.156522204  | 0.242736194 |
| Grpel2 17714         | -1.097929482 | 0.27921545  | 1.000723699  | 0.497823851 |
| Ywhah 22629          | -1.097940728 | 0.23080176  | -1.028218209 | 0.403630952 |
| Klkb1 16621          | -1.097953588 | 0.232061415 | -1.181249252 | 0.064494684 |
| Gm2382 100039707     | -1.098032046 | 0.146613358 | -1.098032046 | 0.146613358 |
| Amn1 232566          | -1.09805755  | 0.414593618 | 1.228753995  | 0.315887073 |
| Dynll1 56455         | -1.098075588 | 0.280377922 | -1.187476545 | 0.153121671 |
| Bend7 209645         | -1.098142162 | 0.353285021 | 1.090084437  | 0.341738948 |
| B3gnt8 232984        | -1.098181762 | 0.302373269 | 1.027416127  | 0.430915042 |
| Ostm1 14628          | -1.098184221 | 0.349375886 | -1.098184221 | 0.349375886 |
| Rnf167 70510         | -1.098198278 | 0.277279036 | -1.062105816 | 0.32861517  |
| 4932438A13Rik 229227 | -1.098288834 | 0.38794194  | 1.044262091  | 0.443762944 |
| Gpt 76282            | -1.098380078 | 0.156009678 | -1.145885642 | 0.079964729 |
| Ushbp1 234395        | -1.09838497  | 0.280361585 | -1.173360784 | 0.119211936 |
| Vps72 21427          | -1.098389299 | 0.257069147 | -1.212688837 | 0.07512037  |
| Ecm1 13601           | -1.098480497 | 0.17165278  | -1.098480497 | 0.17165278  |
| Mad2l2 71890         | -1.098499773 | 0.212990624 | -1.056119893 | 0.323850461 |
| Mtpn 14489           | -1.098515761 | 0.373389413 | -1.039741235 | 0.42939764  |
| Med18 67219          | -1.098823745 | 0.356126905 | 1.048806003  | 0.411701733 |
| Mob3a 208228         | -1.098824805 | 0.35303444  | -1.178343657 | 0.175991344 |
| Tmem97 69071         | -1.09891053  | 0.120563994 | -1.163165101 | 0.005711297 |

|                      |              |             |              |             |
|----------------------|--------------|-------------|--------------|-------------|
| Rai1 19377           | -1.098918057 | 0.316482079 | -1.289235729 | 0.067946587 |
| Tns4 217169          | -1.098923521 | 0.43049474  | -1.643237139 | 0.199632415 |
| Mtap7d1 245877       | -1.098926735 | 0.088323672 | -1.143410629 | 0.01640494  |
| Mgat4a 269181        | -1.098969044 | 0.426471358 | 1.351831964  | 0.273587034 |
| Mrpl4 66163          | -1.099019777 | 0.234589028 | -1.172189147 | 0.094134357 |
| Cfhr1 50702          | -1.09902659  | 0.257513167 | -1.196382976 | 0.107083494 |
| Calcr1 54598         | -1.099068589 | 0.41818106  | -1.245882633 | 0.301680706 |
| Cdc42se2 72729       | -1.099074618 | 0.360376425 | -1.108587709 | 0.341003647 |
| E2f3 13557           | -1.099134962 | 0.328650767 | -1.099134962 | 0.328650767 |
| A530013C23Rik 329562 | -1.09916836  | 0.419169186 | -2.044082876 | 0.020830994 |
| Celsr1 12614         | -1.099218024 | 0.322548806 | 1.162411082  | 0.119504353 |
| Exosc5 27998         | -1.099221159 | 0.299569077 | -1.204985244 | 0.159474574 |
| Slc9a3r2 65962       | -1.099240799 | 0.281456898 | -1.016939086 | 0.455715997 |
| D6Wsu116e 28006      | -1.099296716 | 0.235947152 | -1.034262687 | 0.397509465 |
| Gtpbp1 14904         | -1.099328317 | 0.148553946 | -1.099328317 | 0.148553946 |
| Casp4 12363          | -1.099362454 | 0.442759694 | 1.566000326  | 0.260764541 |
| 1810006K21Rik 69038  | -1.099523228 | 0.328563388 | 1.020093653  | 0.462077049 |
| Fam110b 242297       | -1.09956913  | 0.441456198 | -1.49318803  | 0.267883497 |
| Pcolce 18542         | -1.099635802 | 0.326143748 | -1.305019121 | 0.072639224 |
| Coq5 52064           | -1.09966663  | 0.2328977   | -1.09966663  | 0.2328977   |
| Arl4d 80981          | -1.09968912  | 0.328539987 | -1.000630659 | 0.498859427 |
| Syf2 68592           | -1.099741906 | 0.141452459 | -1.035898847 | 0.297797751 |
| Ptdss1 19210         | -1.099799279 | 0.15384786  | -1.227207225 | 0.001349191 |
| Icam1 15894          | -1.099800115 | 0.233365406 | -1.153431546 | 0.139567223 |
| Sec62 69276          | -1.099853367 | 0.157853157 | -1.050400385 | 0.292669348 |
| Zcchc2 227449        | -1.099920532 | 0.375167959 | -1.099920532 | 0.375167959 |
| Txn14b 234723        | -1.099971207 | 0.256074996 | -1.099971207 | 0.256074996 |
| Slc22a5 20520        | -1.099991492 | 0.225287065 | -1.191199645 | 0.075512253 |
| Gprc5c 70355         | -1.099998958 | 0.192562044 | -1.104419399 | 0.087029359 |
| Ttyh1 57776          | -1.10009172  | 0.409053658 | -1.817530336 | 0.049125667 |
| Apeh 235606          | -1.10020687  | 0.188304726 | -1.107976281 | 0.082586144 |
| Aadac 67758          | -1.100248404 | 0.131563864 | -1.161307126 | 0.033200492 |
| Vdac1 22333          | -1.100251963 | 0.053976575 | -1.17213277  | 0.000148122 |
| 2900097C17Rik 347740 | -1.10026854  | 0.278951888 | 1.077606493  | 0.280742692 |
| Tbc1d10a 103724      | -1.100293936 | 0.239734498 | 1.052250026  | 0.305680401 |
| Nostrin 329416       | -1.100301045 | 0.293173125 | -1.100054449 | 0.256198342 |
| Mn1 433938           | -1.100352448 | 0.356338071 | -1.070002872 | 0.346281755 |
| Cyp2a12 13085        | -1.100514541 | 0.150661124 | -1.054725511 | 0.270683477 |
| Mars 216443          | -1.10056644  | 0.16859738  | -1.109892727 | 0.041699506 |
| Mrrf 67871           | -1.100581696 | 0.270427993 | -1.100581696 | 0.270427993 |
| Tmem20 240660        | -1.100594113 | 0.331047683 | 1.009439171  | 0.474659656 |
| Me1 17436            | -1.10072901  | 0.207995587 | -1.021274821 | 0.41111862  |
| Enc1 13803           | -1.100751063 | 0.377884206 | -1.368164566 | 0.153304211 |
| Bscl2 14705          | -1.100783307 | 0.247938823 | 1.006865157  | 0.474449073 |
| Nrgn 64011           | -1.100884618 | 0.404309918 | 1.358528265  | 0.105649276 |
| Uqcrc1 22273         | -1.10093307  | 0.145199166 | -1.10093307  | 0.145199166 |
| Ddx19b 234733        | -1.101004708 | 0.251973983 | -1.101004708 | 0.251973983 |
| Ogfrl1 70155         | -1.10105329  | 0.382714276 | 1.143647253  | 0.323108016 |
| Sgsm3 105835         | -1.101091127 | 0.376012217 | -1.233073143 | 0.200340315 |
| Dus1 68730           | -1.101098307 | 0.232659049 | -1.101098307 | 0.232659049 |
| Abcd3 19299          | -1.101151731 | 0.276446009 | 1.013229138  | 0.461466177 |
| Klhl2 77113          | -1.101160497 | 0.385995726 | 1.006319009  | 0.492418007 |
| Rdh7 54150           | -1.101191234 | 0.180880097 | -1.164238843 | 0.078451095 |

|                      |              |             |              |             |
|----------------------|--------------|-------------|--------------|-------------|
| Gltpd1 79554         | -1.101252437 | 0.259019104 | -1.033582594 | 0.334010421 |
| Sod1 20655           | -1.101383581 | 0.309673394 | -1.225850014 | 0.153808647 |
| Zfp825 235956        | -1.101489748 | 0.218904881 | -1.083575725 | 0.174479123 |
| Fam36a 66359         | -1.101597875 | 0.225100859 | -1.16822288  | 0.101454452 |
| 9030625A04Rik 210808 | -1.101600697 | 0.290727091 | -1.216698121 | 0.135290528 |
| Atg12 67526          | -1.101647686 | 0.266682077 | -1.224798926 | 0.034242197 |
| Chid1 68038          | -1.101667201 | 0.277345623 | -1.202089599 | 0.137037482 |
| Lyrn2 108755         | -1.101977205 | 0.335510837 | -1.449644014 | 0.01926469  |
| Zfp35 22694          | -1.101990623 | 0.28548669  | -1.101990623 | 0.28548669  |
| Poc1b 382406         | -1.102074205 | 0.352725153 | -1.241526785 | 0.217321483 |
| Vma21 67048          | -1.102088635 | 0.311479973 | 1.029313328  | 0.435070312 |
| Dkc1 245474          | -1.10214163  | 0.275990476 | -1.10214163  | 0.275990476 |
| Furin 18550          | -1.10217291  | 0.130139312 | -1.05680156  | 0.248550696 |
| Slc39a14 213053      | -1.102193098 | 0.267397729 | 1.051950033  | 0.350165117 |
| Gtf3c2 71752         | -1.102345359 | 0.247792838 | -1.028095592 | 0.41641755  |
| 2010106G01Rik 66552  | -1.102353182 | 0.312166476 | 1.137281848  | 0.163220536 |
| Sgms2 74442          | -1.102433335 | 0.356461262 | -1.007670111 | 0.482920115 |
| Tmem167b 67495       | -1.102474084 | 0.33482457  | -1.318577013 | 0.090123169 |
| Mospd2 76763         | -1.10253996  | 0.3975264   | 1.20033393   | 0.282772298 |
| Ranbp2 19386         | -1.102545158 | 0.413939963 | -1.050107426 | 0.457137635 |
| Mecr 26922           | -1.102579282 | 0.247261065 | -1.04452362  | 0.378778702 |
| Cxcl1 14825          | -1.102622038 | 0.446297183 | -1.101104161 | 0.457196108 |
| Carkd 69225          | -1.102627731 | 0.208932944 | -1.102627731 | 0.208932944 |
| Anapc13 69010        | -1.102634943 | 0.299798084 | -1.091913658 | 0.257614372 |
| Snai1 20613          | -1.102654683 | 0.334136459 | 1.038188306  | 0.431029199 |
| Atg9a 245860         | -1.102746724 | 0.079922312 | -1.016775197 | 0.326826317 |
| Tst 22117            | -1.102749648 | 0.274377194 | -1.174418293 | 0.180474034 |
| 1110004F10Rik 56372  | -1.10275926  | 0.167667386 | -1.142288518 | 0.101001429 |
| Gm8909 667977        | -1.102768552 | 0.46446883  | 1            | #DIV/0!     |
| Chm 12662            | -1.102771761 | 0.422709513 | 1.103344271  | 0.405332569 |
| 2310044H10Rik 69683  | -1.102773128 | 0.287103952 | -1.217162224 | 0.132785671 |
| Ints4 101861         | -1.102838343 | 0.283277585 | -1.102838343 | 0.283277585 |
| Fbxo30 71865         | -1.102876109 | 0.363737751 | 1.034403878  | 0.441605177 |
| D15Ert621e 210998    | -1.102983893 | 0.351261989 | -1.096541384 | 0.270325645 |
| Tssk2 22115          | -1.103023756 | 0.461369474 | 1            | #DIV/0!     |
| Gfi1 14581           | -1.103023756 | 0.461369474 | 1            | #DIV/0!     |
| Lgals2 107753        | -1.103023756 | 0.461369474 | 1            | #DIV/0!     |
| Kcna5 16493          | -1.103023756 | 0.461369474 | 1            | #DIV/0!     |
| Spdef 30051          | -1.103023756 | 0.461369474 | 1            | #DIV/0!     |
| Rep15 66532          | -1.103023756 | 0.461369474 | 1            | #DIV/0!     |
| Shc2 216148          | -1.103023756 | 0.461369474 | 1            | #DIV/0!     |
| Scn3b 235281         | -1.103023756 | 0.461369474 | 1            | #DIV/0!     |
| Ppifos 68173         | -1.103023756 | 0.461369474 | 1            | #DIV/0!     |
| Mcm5 17218           | -1.103070001 | 0.387421293 | -1.103070001 | 0.387421293 |
| Lrp10 65107          | -1.103110074 | 0.177904179 | -1.104550433 | 0.100595026 |
| Msto1 229524         | -1.103153221 | 0.269733208 | -1.016903943 | 0.440069246 |
| Cdc123 98828         | -1.103190691 | 0.177465854 | -1.047076174 | 0.318546057 |
| Star 20845           | -1.103300768 | 0.420451904 | -2.289166424 | 0.002629101 |
| Mrps36 66128         | -1.103420828 | 0.278812929 | -1.251351611 | 0.068561902 |
| Zfp2 22678           | -1.103655491 | 0.405852188 | 1.066898461  | 0.39959947  |
| Wdr61 66317          | -1.10367932  | 0.193392821 | -1.038088117 | 0.361140061 |
| Narg2 93697          | -1.103704938 | 0.3592823   | -1.143588669 | 0.235583368 |
| Akap8l 54194         | -1.103710289 | 0.2327165   | -1.200505159 | 0.08252173  |

|                      |              |             |              |             |
|----------------------|--------------|-------------|--------------|-------------|
| Larp1b 214048        | -1.103789078 | 0.265322724 | -1.19830045  | 0.049758081 |
| 2410089E03Rik 73692  | -1.103816842 | 0.384328365 | -1.288870008 | 0.195036129 |
| Slc7a8 50934         | -1.103883549 | 0.325651608 | -1.029730539 | 0.411159615 |
| Oas3 246727          | -1.103925293 | 0.376935558 | 1.313055525  | 0.100568822 |
| Rnft1 76892          | -1.103968797 | 0.363168299 | 1.004523099  | 0.493447535 |
| Ube2e1 22194         | -1.103974735 | 0.385750729 | -1.124134544 | 0.286606652 |
| Mapk15 332110        | -1.104093635 | 0.366729629 | -1.004854459 | 0.493919215 |
| Decr2 26378          | -1.104257461 | 0.106444605 | -1.062660509 | 0.207754675 |
| Mctp2 244049         | -1.104259806 | 0.375854756 | -1.258515643 | 0.213439808 |
| BC005624 227707      | -1.10434101  | 0.190250846 | -1.040583766 | 0.352877792 |
| Acvr1 11477          | -1.104360669 | 0.367391779 | -1.238729384 | 0.253968022 |
| Snx12 55988          | -1.104367903 | 0.214074258 | -1.104367903 | 0.214074258 |
| Cul4b 72584          | -1.104464669 | 0.336484258 | 1.059159237  | 0.392053935 |
| Tnfaip81 66443       | -1.104491668 | 0.256570045 | -1.160858976 | 0.116662473 |
| Nudt22 68323         | -1.104634938 | 0.267346407 | 1.076267132  | 0.270383554 |
| D430042O09Rik 233865 | -1.104758527 | 0.213522093 | 1.055613915  | 0.207711461 |
| Ripk2 192656         | -1.104837218 | 0.377851859 | -1.104837218 | 0.377851859 |
| Atp6v1a 11964        | -1.104901096 | 0.320603666 | -1.104901096 | 0.320603666 |
| Bub3 12237           | -1.105047754 | 0.163039266 | -1.134244205 | 0.122084009 |
| Mettl16 67493        | -1.105062806 | 0.216112306 | -1.0214576   | 0.423262307 |
| Engase 217364        | -1.105071324 | 0.205303164 | 1.045855876  | 0.255150662 |
| Abhd16a 193742       | -1.105077884 | 0.069264145 | -1.14462122  | 0.02426691  |
| Ppp2r3a 235542       | -1.105312383 | 0.349126836 | 1.00604124   | 0.490193812 |
| Otud7b 229603        | -1.105336207 | 0.262684519 | -1.055049825 | 0.37032642  |
| 1110034B05Rik 68736  | -1.105336319 | 0.40462589  | -1.571445828 | 0.131377168 |
| Mrps21 66292         | -1.105458688 | 0.315893584 | -1.065682065 | 0.305904921 |
| Mrps27 218506        | -1.105497001 | 0.258821134 | -1.014346607 | 0.457136914 |
| Klc4 74764           | -1.105501532 | 0.161467622 | -1.105501532 | 0.161467622 |
| Grem2 23893          | -1.105535734 | 0.356637826 | -1.539438376 | 0.015224935 |
| Pdzd8 107368         | -1.105551509 | 0.340292329 | 1.105256187  | 0.286431049 |
| 9030425E11Rik 71566  | -1.105600254 | 0.395377397 | -1.742553972 | 0.031364529 |
| 9830001H06Rik 320706 | -1.105610997 | 0.206384115 | 1.052837484  | 0.197073969 |
| Gm11194 790911       | -1.105686963 | 0.457785507 | 1.150701957  | 0.450338304 |
| Rnf150 330812        | -1.105747413 | 0.374879679 | -1.105747413 | 0.374879679 |
| Smg5 229512          | -1.105873632 | 0.127251442 | -1.065159991 | 0.12833148  |
| Amigo2 105827        | -1.105884813 | 0.294747666 | -1.105884813 | 0.294747666 |
| Rpa1 68275           | -1.10590874  | 0.286301387 | -1.343094339 | 0.02901624  |
| Tomm70a 28185        | -1.105979143 | 0.235818102 | -1.310097651 | 0.004820899 |
| Dnajc18 76594        | -1.106000054 | 0.264590499 | 1.025683887  | 0.409639255 |
| Psmc12 66997         | -1.106080034 | 0.200526535 | 1.0315115    | 0.336522403 |
| Tm2d2 69742          | -1.106116043 | 0.152906918 | -1.106116043 | 0.152906918 |
| Umps 22247           | -1.106140553 | 0.313553942 | -1.054286169 | 0.40818156  |
| Micall1 27008        | -1.10614916  | 0.299717196 | -1.303280931 | 0.046789255 |
| Fut11 73068          | -1.106152098 | 0.371944579 | 1.27033446   | 0.165570967 |
| Lats2 50523          | -1.106241909 | 0.412433195 | -1.224583761 | 0.321752687 |
| Abi2 329165          | -1.106254396 | 0.417444862 | -1.488990659 | 0.229586367 |
| Fut10 171167         | -1.106285461 | 0.428894684 | 1.24799293   | 0.361390656 |
| Prickle3 54630       | -1.106377716 | 0.264331835 | -1.025635244 | 0.432369589 |
| Gpm6a 234267         | -1.106459524 | 0.44336767  | -2.077814532 | 0.188577653 |
| Vps11 71732          | -1.106565678 | 0.183677708 | -1.220868873 | 0.009204323 |
| Prosc 114863         | -1.106589394 | 0.119038228 | -1.106589394 | 0.119038228 |
| Serpina1b 20701      | -1.106733169 | 0.231788677 | -1.283232024 | 0.00350329  |
| Ctsh 13036           | -1.106816279 | 0.17954709  | -1.236767915 | 0.013765771 |



|                         |              |             |              |             |
|-------------------------|--------------|-------------|--------------|-------------|
| F7 14068                | -1.106816875 | 0.270252511 | -1.212573064 | 0.127323376 |
| Rnf20 109331            | -1.106818375 | 0.319123041 | 1.0566967    | 0.377594974 |
| Slc35c2 228875          | -1.10688986  | 0.198925512 | -1.267328383 | 0.009418539 |
| Steap4 117167           | -1.106910185 | 0.243640155 | -1.106910185 | 0.243640155 |
| Gpkow 209416            | -1.106925437 | 0.35905561  | -1.303324909 | 0.183512114 |
| Pin1 23988              | -1.10693089  | 0.197459294 | -1.10693089  | 0.197459294 |
| Pitpnc1 71795           | -1.107076922 | 0.300460864 | -1.074255893 | 0.322731779 |
| Prpf40b 54614           | -1.107092652 | 0.295100025 | 1.01364511   | 0.464405059 |
| Gpr137 107173           | -1.107107918 | 0.148261832 | -1.04809064  | 0.293655633 |
| Sin3a 20466             | -1.107214122 | 0.246446463 | -1.120640828 | 0.190601548 |
| Jkamp 104771            | -1.107235419 | 0.378000846 | -1.107235419 | 0.378000846 |
| Gpr89 67549             | -1.107272036 | 0.266251488 | -1.032918496 | 0.422682831 |
| Cfp 18636               | -1.107300686 | 0.258091511 | -1.107300686 | 0.258091511 |
| Rbm25 67039             | -1.107319164 | 0.266620241 | -1.016879207 | 0.422309473 |
| Pknx1 18771             | -1.10732262  | 0.194311877 | -1.209891951 | 0.01321719  |
| Tpd52l1 21987           | -1.107373541 | 0.309134556 | -1.054219697 | 0.313839484 |
| Atg2a 329015            | -1.107374067 | 0.086865592 | -1.05926074  | 0.178906283 |
| Dmbt1 12945             | -1.107378048 | 0.470748597 | -2.8         | 0.173296754 |
| Pkm2 18746              | -1.107397363 | 0.243135191 | -1.076815804 | 0.223835871 |
| Dbi 13167               | -1.107454923 | 0.297714051 | -1.107454923 | 0.297714051 |
| Gosr2 56494             | -1.107456763 | 0.105487075 | -1.107456763 | 0.105487075 |
| Mcc 328949              | -1.107480957 | 0.312281131 | -1.060445768 | 0.35990186  |
| Map3k3 26406            | -1.107502781 | 0.383514862 | -1.107502781 | 0.383514862 |
| 1700021K19Rik 100502698 | -1.107534302 | 0.199906029 | -1.107534302 | 0.199906029 |
| Ccdc88c 68339           | -1.107556171 | 0.410420126 | 1.182933057  | 0.361044289 |
| Znrf3 407821            | -1.107598225 | 0.371133271 | 1.327627504  | 0.019691073 |
| App1 72993              | -1.10760624  | 0.365805139 | -1.352733886 | 0.157412574 |
| Pik3r1 18708            | -1.107616598 | 0.361848974 | 1.227408811  | 0.196252074 |
| Stau2 29819             | -1.107649615 | 0.416124651 | -1.305073909 | 0.276082037 |
| Mtf1 17764              | -1.107665513 | 0.16580976  | -1.164693388 | 0.063834855 |
| Fam176b 230752          | -1.107673756 | 0.34825319  | -1.302318508 | 0.161749213 |
| Triap1 69076            | -1.10777347  | 0.298053504 | 1.12281646   | 0.188878842 |
| Tnpo3 320938            | -1.107796142 | 0.2302513   | -1.011081117 | 0.458647667 |
| 2010012O05Rik 66439     | -1.107865732 | 0.271234374 | -1.32900111  | 0.028348941 |
| Abhd12 76192            | -1.107878299 | 0.238817133 | -1.139229924 | 0.093550531 |
| Kremen1 84035           | -1.107886268 | 0.272406618 | -1.314043932 | 0.041210102 |
| Mtmr14 97287            | -1.108093191 | 0.244686526 | 1.064190107  | 0.233008862 |
| Wdfy1 69368             | -1.108182408 | 0.284307578 | -1.011131229 | 0.474936062 |
| Cnst 226744             | -1.10850571  | 0.402873721 | 1.107748108  | 0.34120505  |
| Stk39 53416             | -1.108511966 | 0.403686133 | -1.308146657 | 0.221157384 |
| Lamp2 16784             | -1.108514137 | 0.254952514 | -1.116290072 | 0.237503357 |
| C4bp 12269              | -1.108687609 | 0.285459238 | -1.013152094 | 0.470998302 |
| Sec24c 218811           | -1.108822247 | 0.1613695   | -1.042212369 | 0.317766367 |
| Ethe1 66071             | -1.108854061 | 0.238512756 | -1.194587602 | 0.118033265 |
| Cnpy2 56530             | -1.108890829 | 0.15150897  | -1.087780132 | 0.215965812 |
| Pnkp 59047              | -1.108910646 | 0.269207718 | -1.01403469  | 0.465415578 |
| 4930581F22Rik 78934     | -1.108912523 | 0.286586363 | -1.202065393 | 0.144395775 |
| Eccit 26940             | -1.108986423 | 0.23551382  | -1.279785428 | 0.026548699 |
| Bag4 67384              | -1.109052459 | 0.359361326 | -1.321982116 | 0.173590732 |
| Mtmr9 210376            | -1.109072841 | 0.41917065  | 1.426576913  | 0.212510287 |
| B4galt3 57370           | -1.109133845 | 0.295403435 | -1.374274907 | 0.02522531  |
| Ublcp1 79560            | -1.109174389 | 0.252471782 | -1.219016307 | 0.057269627 |
| Wac 225131              | -1.109225176 | 0.212540733 | -1.016966578 | 0.436624521 |

|                     |              |             |              |             |
|---------------------|--------------|-------------|--------------|-------------|
| Pomt2 217734        | -1.109426507 | 0.148851262 | -1.03128175  | 0.32448956  |
| Gpn3 68080          | -1.109476205 | 0.2906711   | -1.396740837 | 0.003428925 |
| Grtp1 66790         | -1.109479087 | 0.292046003 | -1.109479087 | 0.292046003 |
| Casp3 12367         | -1.109481631 | 0.391004591 | 1.078699749  | 0.408394536 |
| Paqr7 71904         | -1.109483797 | 0.149790131 | -1.109483797 | 0.149790131 |
| Slc25a26 67582      | -1.109500149 | 0.253102327 | -1.218836565 | 0.059915749 |
| 2610029101Rik 77032 | -1.109526163 | 0.241361317 | 1.006549053  | 0.473037804 |
| Znrd1 66136         | -1.109553749 | 0.259323106 | -1.220822609 | 0.107437584 |
| Stag2 20843         | -1.109690622 | 0.279106597 | 1.017580695  | 0.453168163 |
| Cbx2 12416          | -1.109794753 | 0.310998075 | -1.328047986 | 0.000985848 |
| Malt1 240354        | -1.109807339 | 0.394994659 | -1.409805383 | 0.206748338 |
| Tln1 21894          | -1.109886466 | 0.153501567 | -1.162921892 | 0.07896819  |
| Supt6h 20926        | -1.109961251 | 0.110472982 | -1.109961251 | 0.110472982 |
| Rsf1 233532         | -1.109978151 | 0.314415047 | -1.009785066 | 0.480843622 |
| Psemb8 16913        | -1.110111384 | 0.265063331 | -1.082189411 | 0.250887285 |
| Oit3 18302          | -1.110138532 | 0.222630333 | -1.137315261 | 0.109420123 |
| Psemb10 19171       | -1.110198108 | 0.357442218 | -1.268507924 | 0.124862363 |
| Serpinf2 18816      | -1.110262982 | 0.208909297 | -1.120031215 | 0.13952764  |
| Pdia3 14827         | -1.110264041 | 0.245897066 | -1.110264041 | 0.245897066 |
| Th1l 57314          | -1.110274736 | 0.195010903 | -1.029394601 | 0.389916804 |
| Rpgr 19893          | -1.110369511 | 0.447767173 | -1.036968712 | 0.482217965 |
| Afap1l1 106877      | -1.11044809  | 0.256023113 | -1.213878333 | 0.078479375 |
| 1110008P14Rik 73737 | -1.110491985 | 0.308443478 | -1.097788722 | 0.30183335  |
| Ctsb 13030          | -1.110693559 | 0.12203297  | -1.138985864 | 0.025549629 |
| Akt1s1 67605        | -1.110706307 | 0.211416865 | -1.041167034 | 0.368196131 |
| Gramd1c 207798      | -1.110768456 | 0.252297127 | -1.017287572 | 0.449591755 |
| Isca2 74316         | -1.110771938 | 0.2016744   | -1.032839144 | 0.380733558 |
| Gm3336 100041434    | -1.110840338 | 0.40839292  | -1.294709025 | 0.200701304 |
| Stt3b 68292         | -1.110879597 | 0.205646563 | -1.182300617 | 0.080239932 |
| Ube2l6 56791        | -1.110890582 | 0.046744228 | -1.110890582 | 0.046744228 |
| Bag2 213539         | -1.110910985 | 0.297642976 | -1.294749682 | 0.07317934  |
| Poll 56626          | -1.110939614 | 0.256689948 | -1.013232892 | 0.464697767 |
| Hdac5 15184         | -1.110948608 | 0.195119984 | -1.109660573 | 0.10187663  |
| Zfp94 22756         | -1.11098598  | 0.398440205 | -1.411145229 | 0.219727047 |
| Thpo 21832          | -1.111041211 | 0.234662526 | -1.342109453 | 0.000715648 |
| Cog4 102339         | -1.111298475 | 0.159255882 | -1.114142822 | 0.085190994 |
| Ubl3 24109          | -1.111317483 | 0.228705355 | -1.002153367 | 0.49195363  |
| Tbc1d25 209815      | -1.111359305 | 0.342856213 | -1.394703273 | 0.067880075 |
| Pex11b 18632        | -1.111367437 | 0.113417543 | -1.138411559 | 0.080908498 |
| Lbp 16803           | -1.111497231 | 0.154745119 | -1.158872301 | 0.092000771 |
| Lcp1 18826          | -1.111499801 | 0.264986523 | -1.111499801 | 0.264986523 |
| Akr7a5 110198       | -1.111551277 | 0.313148704 | -1.319809258 | 0.0766729   |
| Mrps2 118451        | -1.111595606 | 0.313129146 | -1.219801433 | 0.166078118 |
| Rnf141 67150        | -1.111606482 | 0.427468748 | 1.59679169   | 0.175708399 |
| Dctn5 59288         | -1.111636596 | 0.276113839 | -1.082574284 | 0.259386008 |
| Dync1li1 235661     | -1.111705663 | 0.221688397 | -1.111705663 | 0.221688397 |
| Rpe 66646           | -1.111729495 | 0.333219985 | 1.015627999  | 0.475144227 |
| Ddx54 71990         | -1.111889008 | 0.225825863 | -1.120661677 | 0.144997835 |
| Ptk2b 19229         | -1.112037451 | 0.153831    | 1.001957967  | 0.489030649 |
| Trappc2l 59005      | -1.11204765  | 0.299307973 | 1.152740182  | 0.07098105  |
| Cs 12974            | -1.112079557 | 0.085055309 | -1.135916065 | 0.060885929 |
| Tstd2 272027        | -1.112083631 | 0.369736722 | 1.090153211  | 0.391516785 |
| Zswim4 212168       | -1.112113203 | 0.213922314 | -1.187946364 | 0.082497338 |

|                      |              |             |              |             |
|----------------------|--------------|-------------|--------------|-------------|
| Rad51l3 19364        | -1.112229317 | 0.224296694 | -1.20880169  | 0.08706057  |
| Atp6v0a1 11975       | -1.112347847 | 0.126595337 | 1.000294618  | 0.49790148  |
| Ndufab1 70316        | -1.112387674 | 0.296898894 | 1.011340967  | 0.475766955 |
| Mllt4 17356          | -1.112394862 | 0.399792432 | 1.08902241   | 0.37673646  |
| Mut 17850            | -1.112410977 | 0.326648946 | 1.051242886  | 0.406809493 |
| Al314180 230249      | -1.112520703 | 0.142970971 | -1.036876802 | 0.306013003 |
| Fbxl19 233902        | -1.112523182 | 0.157628457 | -1.049900071 | 0.300280968 |
| Rab1 19324           | -1.11255315  | 0.267344944 | -1.019535657 | 0.450066644 |
| Prmt2 15468          | -1.112578498 | 0.411759383 | -1.630036358 | 0.163641542 |
| Sh3tc1 231147        | -1.112626488 | 0.295505242 | -1.411927822 | 0.004393944 |
| Atg4b 66615          | -1.112652312 | 0.173229209 | -1.112652312 | 0.173229209 |
| Mtx2 53375           | -1.112654646 | 0.255638483 | -1.036232662 | 0.414098127 |
| Tm7sf3 67623         | -1.112678056 | 0.09520585  | -1.112678056 | 0.09520585  |
| Hadha 97212          | -1.112690885 | 0.105316282 | -1.112690885 | 0.105316282 |
| Dlat 235339          | -1.11271352  | 0.301790856 | 1.115875043  | 0.253480367 |
| Pop7 74097           | -1.112887052 | 0.263120415 | -1.050579951 | 0.385369415 |
| Sccpdh 109232        | -1.112892251 | 0.388346995 | 1.294136637  | 0.148074256 |
| Lilra5 232801        | -1.112912637 | 0.375775578 | -1.468814834 | 0.113950942 |
| Rbm47 245945         | -1.112989136 | 0.342181553 | -1.232569317 | 0.235020501 |
| Erlin1 226144        | -1.113044392 | 0.307975405 | -1.369798337 | 0.019122428 |
| Rab8b 235442         | -1.11311066  | 0.385629168 | -1.347192347 | 0.23014393  |
| Tbccd1 70573         | -1.113123403 | 0.164006586 | -1.113123403 | 0.164006586 |
| Selenbp2 20342       | -1.113132509 | 0.398073734 | -1.568755008 | 0.136152677 |
| Ccz1 231874          | -1.113222161 | 0.334243251 | -1.113222161 | 0.334243251 |
| Stx18 71116          | -1.113253848 | 0.202446647 | -1.113253848 | 0.202446647 |
| Ntrk2 18212          | -1.11330059  | 0.419060125 | 1.324251398  | 0.298690411 |
| Shroom3 27428        | -1.113328958 | 0.216339753 | -1.243776443 | 0.02870958  |
| Zfp523 224656        | -1.113382568 | 0.243249368 | -1.113382568 | 0.243249368 |
| Dnajc19 67713        | -1.113389438 | 0.246895029 | -1.113389438 | 0.246895029 |
| Ap1ar 211556         | -1.113389825 | 0.336832916 | 1.220222648  | 0.111556157 |
| Elov1 54325          | -1.113600083 | 0.248989958 | 1.014066956  | 0.451084106 |
| Zfp868 234362        | -1.113631599 | 0.392222239 | 1.035863469  | 0.467742906 |
| H2-Q6 110557         | -1.113641368 | 0.299483957 | 1.006481709  | 0.486812659 |
| Padi2 18600          | -1.113644249 | 0.41421642  | -1.147248567 | 0.382504897 |
| Kcnj16 16517         | -1.113654411 | 0.260440914 | -1.347945206 | 0.013470644 |
| Cacng1 12299         | -1.113734611 | 0.436962391 | 1.820526892  | 0.173977924 |
| Pcbd1 13180          | -1.113779743 | 0.084236672 | -1.173031938 | 0.005246178 |
| Igf2bp2 319765       | -1.113791759 | 0.315391909 | -1.113791759 | 0.315391909 |
| Slc12a9 83704        | -1.113813944 | 0.251503077 | -1.197014984 | 0.119176624 |
| Lin37 75660          | -1.113819901 | 0.284448195 | -1.025554266 | 0.443911024 |
| 2700007P21Rik 212772 | -1.11402108  | 0.360463761 | -1.303566538 | 0.207081988 |
| Ccdc125 76041        | -1.114068266 | 0.251775512 | -1.114068266 | 0.251775512 |
| Pigo 56703           | -1.114084326 | 0.210959201 | -1.011105711 | 0.456397786 |
| Phactr4 100169       | -1.114102693 | 0.242100754 | -1.080484105 | 0.278101146 |
| Limk2 16886          | -1.114141476 | 0.348548255 | 1.121097904  | 0.298552698 |
| Srp54a 24067         | -1.114197098 | 0.299096474 | -1.043895774 | 0.422644677 |
| St7 64213            | -1.114246149 | 0.26215878  | -1.265757551 | 0.062537619 |
| Apoh 11818           | -1.114311589 | 0.187835869 | -1.224776373 | 0.002410226 |
| Asah1 11886          | -1.114337549 | 0.370209515 | 1.13988931   | 0.325746117 |
| G3bp2 23881          | -1.114410485 | 0.346718534 | -1.036635755 | 0.43037128  |
| Rxrg 20183           | -1.114463113 | 0.322222584 | -1.114463113 | 0.322222584 |
| Bdh1 71911           | -1.114466795 | 0.121856519 | -1.070628542 | 0.221379428 |
| Cope 59042           | -1.114489245 | 0.220190321 | 1.00291048   | 0.487391157 |

|                      |              |             |              |             |
|----------------------|--------------|-------------|--------------|-------------|
| Hgs 15239            | -1.114619621 | 0.050311372 | -1.08555292  | 0.101316807 |
| Rhot1 59040          | -1.114642578 | 0.194173113 | -1.114642578 | 0.194173113 |
| Cd80 12519           | -1.114716062 | 0.451648716 | 3.286172748  | 0.091708258 |
| Slc25a4 11739        | -1.114934452 | 0.298510357 | -1.037580914 | 0.428452184 |
| Tmem30b 238257       | -1.114991661 | 0.316589944 | -1.29693586  | 0.12384731  |
| Slc10a2 20494        | -1.115015901 | 0.406700742 | 1.332386316  | 0.238370282 |
| Mrpl16 94063         | -1.115063344 | 0.151861617 | -1.115063344 | 0.151861617 |
| Alg5 66248           | -1.11511115  | 0.090404329 | -1.020333699 | 0.353729502 |
| Mrps5 77721          | -1.115155545 | 0.138991242 | -1.048509849 | 0.28141885  |
| Mrpl38 60441         | -1.115261996 | 0.172978171 | -1.192499245 | 0.038564276 |
| Tlcd1 68385          | -1.115285344 | 0.273465587 | -1.115285344 | 0.273465587 |
| Mau2 74549           | -1.115311263 | 0.222977449 | -1.115311263 | 0.222977449 |
| Ifrd2 15983          | -1.115382933 | 0.012720444 | -1.082348911 | 0.015203205 |
| Fam161a 73873        | -1.115391161 | 0.385784906 | -1.251049021 | 0.273154605 |
| 2610008E11Rik 72128  | -1.115401256 | 0.401707912 | 1.245554265  | 0.298694359 |
| Mrps18a 68565        | -1.115418561 | 0.204338764 | -1.115418561 | 0.204338764 |
| 3110002H16Rik 76482  | -1.115439708 | 0.286812322 | -1.235432729 | 0.10539683  |
| Mov10 17454          | -1.115603731 | 0.162532682 | -1.097975059 | 0.136369799 |
| Nt5dc1 319638        | -1.115668705 | 0.367181478 | 1.315267625  | 0.111740721 |
| Glod4 67201          | -1.115733126 | 0.20631701  | -1.1829533   | 0.117927209 |
| Rpl30 19946          | -1.115755573 | 0.089832785 | -1.178669013 | 0.005031281 |
| Mrpl1 94061          | -1.115781648 | 0.285074747 | 1.051697781  | 0.34523326  |
| Nags 217214          | -1.115818028 | 0.162200317 | -1.158265225 | 0.111904133 |
| Bud13 215051         | -1.115900442 | 0.245960695 | -1.018648745 | 0.4498611   |
| Tarbp2 21357         | -1.115907818 | 0.197892521 | -1.115907818 | 0.197892521 |
| Ccdc97 52132         | -1.115909391 | 0.163917273 | -1.134904503 | 0.056330258 |
| Mbd3 17192           | -1.115941609 | 0.300888108 | -1.273782517 | 0.124328081 |
| Asxl1 228790         | -1.115973691 | 0.272283313 | -1.052404479 | 0.390071533 |
| Serping1 12258       | -1.11598166  | 0.172971012 | -1.11598166  | 0.172971012 |
| Lmbr1 56873          | -1.11599785  | 0.363954796 | -1.614474685 | 0.036164142 |
| Prrg2 65116          | -1.116016476 | 0.203253447 | -1.196268756 | 0.093329136 |
| Zfp498 666311        | -1.116026554 | 0.376892358 | -1.116026554 | 0.376892358 |
| Gjb1 14618           | -1.116159675 | 0.192876088 | -1.214142051 | 0.053490258 |
| Cul9 78309           | -1.116269814 | 0.244397263 | -1.116269814 | 0.244397263 |
| Fbxw10 213980        | -1.116286781 | 0.456834809 | 1            | #DIV/0!     |
| Scn4a 110880         | -1.116286781 | 0.456834809 | 1            | #DIV/0!     |
| Kdelr3 105785        | -1.116286781 | 0.456834809 | 1            | #DIV/0!     |
| Gpx2 14776           | -1.116286781 | 0.456834809 | 1            | #DIV/0!     |
| Tmem215 320500       | -1.116286781 | 0.456834809 | 1            | #DIV/0!     |
| D730005E14Rik 109361 | -1.116286781 | 0.456834809 | 1            | #DIV/0!     |
| Ipo5 70572           | -1.116352905 | 0.113440971 | -1.137254054 | 0.03443302  |
| Tanc2 77097          | -1.11637934  | 0.401078244 | -1.751491996 | 0.071732125 |
| Cstf3 228410         | -1.116394418 | 0.239501145 | -1.116394418 | 0.239501145 |
| Cd7 12516            | -1.116403127 | 0.408171134 | 1.066433433  | 0.442314567 |
| Spop 20747           | -1.116480845 | 0.263241317 | -1.048162464 | 0.291238775 |
| Mis12 67139          | -1.116492241 | 0.300746551 | -1.116492241 | 0.300746551 |
| Tmed10 68581         | -1.116514726 | 0.029414511 | -1.084849828 | 0.060758923 |
| Tmem53 68777         | -1.116669671 | 0.236531566 | -1.200727338 | 0.031896508 |
| Wars 22375           | -1.116680568 | 0.248533635 | -1.036490445 | 0.406752853 |
| Rrp12 107094         | -1.116695724 | 0.240177318 | -1.238456333 | 0.077375668 |
| Unc93b1 54445        | -1.116704051 | 0.067622153 | -1.142326697 | 0.049100808 |
| Amotl1 75723         | -1.116773324 | 0.210810335 | -1.189698426 | 0.091179678 |
| Rpl7 19989           | -1.116806893 | 0.146927635 | -1.061679211 | 0.269194786 |

|                      |              |             |              |             |
|----------------------|--------------|-------------|--------------|-------------|
| Xpo1 103573          | -1.116809298 | 0.232445782 | -1.21967188  | 0.095284204 |
| Cmtm8 70031          | -1.116820538 | 0.067983532 | -1.206962169 | 0.002891802 |
| Mtch1 56462          | -1.116860131 | 0.171861672 | -1.212566718 | 0.036345097 |
| Serpib8 20725        | -1.116917567 | 0.303460264 | -1.274795404 | 0.131000826 |
| C230052112Rik 101831 | -1.116966399 | 0.335109119 | 1.212485726  | 0.136502161 |
| Trappc3 27096        | -1.117048922 | 0.09968561  | -1.235171833 | 0.001010217 |
| Ppara 19013          | -1.117083043 | 0.118529808 | -1.043256599 | 0.253788758 |
| Ehmt2 110147         | -1.117140599 | 0.160616946 | -1.165329868 | 0.050774779 |
| 2210411K11Rik 664968 | -1.117170628 | 0.338622162 | 1.200558067  | 0.186209174 |
| Dync1li2 234663      | -1.117171038 | 0.267328946 | 1.017793448  | 0.450167145 |
| Wdr45l 66840         | -1.117206418 | 0.166442447 | -1.117206418 | 0.166442447 |
| Ddx19a 13680         | -1.11729046  | 0.226448969 | -1.208777952 | 0.105662939 |
| Glipr2 384009        | -1.117371647 | 0.417791125 | -1.117371647 | 0.417791125 |
| Heatr2 433956        | -1.11749856  | 0.201493337 | -1.11749856  | 0.201493337 |
| Pcid2 234069         | -1.117555517 | 0.167241688 | -1.071279278 | 0.1709662   |
| Ssr3 67437           | -1.117629705 | 0.174645291 | -1.030146857 | 0.373303343 |
| Limk1 16885          | -1.117732191 | 0.332530455 | 1.119414868  | 0.252462643 |
| Igf1r 16001          | -1.117804586 | 0.39161909  | -1.399518427 | 0.224715379 |
| Prodh2 56189         | -1.117814045 | 0.246277712 | -1.295586087 | 0.016988836 |
| Aup1 11993           | -1.117817817 | 0.203622552 | -1.194657072 | 0.101576833 |
| Strn4 97387          | -1.1178207   | 0.243843398 | -1.1178207   | 0.243843398 |
| Lrrc41 230654        | -1.117824975 | 0.160226114 | -1.049613078 | 0.308138464 |
| Gm13498 227885       | -1.11786922  | 0.314499667 | -1.005713667 | 0.490369901 |
| Cfd 11537            | -1.117929232 | 0.468955426 | -2.8202      | 0.173296754 |
| Fcer1g 14127         | -1.117991094 | 0.288461544 | -1.117991094 | 0.288461544 |
| Sgta 52551           | -1.118009885 | 0.119913874 | -1.228849365 | 0.008690011 |
| Rela 19697           | -1.118086247 | 0.10966327  | -1.143377558 | 0.027771886 |
| Hdlbp 110611         | -1.118235667 | 0.089789327 | -1.070887144 | 0.181321    |
| Ndr2 29811           | -1.118271659 | 0.176611506 | -1.216310549 | 0.039577327 |
| Amh 11705            | -1.118272848 | 0.435132612 | 1.018192343  | 0.490530101 |
| Fam92a 68099         | -1.118294675 | 0.334533804 | -1.212920139 | 0.231654465 |
| Acsm5 272428         | -1.118298836 | 0.165275317 | -1.27966975  | 0.003392185 |
| Lman2 66890          | -1.118306618 | 0.030506095 | -1.118306618 | 0.030506095 |
| Pak2 224105          | -1.11851635  | 0.281369299 | -1.361810609 | 0.020341498 |
| Ppp2r3c 59032        | -1.118541792 | 0.225910242 | 1.050650263  | 0.320624319 |
| Tsg101 22088         | -1.118561213 | 0.200605902 | -1.118561213 | 0.200605902 |
| Jub 16475            | -1.118576707 | 0.287276714 | 1.03316087   | 0.419042905 |
| Ppl 19041            | -1.118617222 | 0.359243842 | 1.055781144  | 0.3932856   |
| Cd33 12489           | -1.11867306  | 0.454690003 | -1.305244483 | 0.378399987 |
| Rhbd1 214951         | -1.118721254 | 0.355378637 | 1.031820344  | 0.438482947 |
| 3830406C13Rik 218734 | -1.118853994 | 0.211437447 | -1.002842533 | 0.487877475 |
| Hpgd 15446           | -1.118908696 | 0.268491953 | -1.014936594 | 0.462832328 |
| Fam38b 667742        | -1.11891447  | 0.38785793  | -1.00734791  | 0.492397667 |
| Fah 14085            | -1.118936212 | 0.154440105 | -1.176278521 | 0.08116936  |
| Akr1b8 14187         | -1.119009192 | 0.322970217 | -1.019592182 | 0.470233855 |
| Snd1 56463           | -1.119031485 | 0.218956001 | -1.053345304 | 0.354927216 |
| 2510006D16Rik 76799  | -1.119072948 | 0.084587625 | -1.119072948 | 0.084587625 |
| D930015E06Rik 229473 | -1.119134376 | 0.126086274 | -1.121073066 | 0.074362361 |
| Oma1 67013           | -1.119195609 | 0.286087705 | -1.314624356 | 0.058635642 |
| Ccdc127 67433        | -1.119227608 | 0.12944888  | -1.119227608 | 0.12944888  |
| Sbf1 77980           | -1.119330403 | 0.219861591 | -1.054079518 | 0.360933687 |
| Slc37a2 56857        | -1.119375667 | 0.365359336 | -1.375865193 | 0.125047615 |
| Dhrs4 28200          | -1.119426077 | 0.128437571 | -1.119426077 | 0.128437571 |

|                         |              |             |              |             |
|-------------------------|--------------|-------------|--------------|-------------|
| Poldip2 67811           | -1.119436999 | 0.128424945 | -1.119436999 | 0.128424945 |
| Fam53a 74504            | -1.119521464 | 0.259950442 | -1.261296473 | 0.083540126 |
| Pfdn4 109054            | -1.11955125  | 0.34614374  | -1.367468815 | 0.134236468 |
| Cand1 71902             | -1.119586195 | 0.228944363 | -1.228020726 | 0.086781707 |
| Ythdc1 231386           | -1.119649355 | 0.338660292 | 1.094450359  | 0.344233609 |
| 2810410L24Rik 100042332 | -1.119701766 | 0.390881117 | -1.918229861 | 0.013472978 |
| Fam53b 77938            | -1.119723365 | 0.233029282 | -1.250126249 | 0.06092429  |
| Stx16 228960            | -1.119730534 | 0.300169456 | 1.033049304  | 0.397883278 |
| Vill 22351              | -1.119795517 | 0.386642708 | -1.336006132 | 0.198731765 |
| Spata2 263876           | -1.119854733 | 0.252588263 | 1.085249797  | 0.207846437 |
| Sumo1 22218             | -1.119894918 | 0.259321875 | -1.119894918 | 0.259321875 |
| Tbx2 21385              | -1.119925586 | 0.351854249 | 1.030591469  | 0.454699156 |
| Usp16 74112             | -1.119939465 | 0.319491984 | -1.227663966 | 0.190252185 |
| Ext1 14042              | -1.120046461 | 0.177881134 | -1.204330413 | 0.063679525 |
| 1300018J18Rik 223776    | -1.120048575 | 0.216562971 | -1.190017106 | 0.130241671 |
| Pogz 229584             | -1.120158085 | 0.293238205 | -1.006957994 | 0.483310387 |
| Psme2 19188             | -1.12020238  | 0.362284952 | 1.011679186  | 0.4769713   |
| 1500002O20Rik 71997     | -1.120228264 | 0.211901355 | -1.120228264 | 0.211901355 |
| Prpf4 70052             | -1.120251262 | 0.252366725 | -1.205348506 | 0.125696471 |
| Ces1e 13897             | -1.120275462 | 0.288347483 | -1.297704987 | 0.017099651 |
| Klf4 16600              | -1.120288085 | 0.386150145 | -1.411513943 | 0.208960691 |
| Ccnd2 12444             | -1.120344064 | 0.390155491 | -1.127248857 | 0.380974524 |
| Ube2j1 56228            | -1.120379165 | 0.196764032 | -1.208304354 | 0.079416978 |
| Cyp4f15 106648          | -1.120479694 | 0.236705849 | -1.285102028 | 0.024358684 |
| Dph2 67728              | -1.120631325 | 0.328907642 | 1.173755311  | 0.219962008 |
| Pi16 74116              | -1.120639499 | 0.441669825 | -1.581645013 | 0.312620442 |
| Aebp1 11568             | -1.120644876 | 0.411079166 | -1.120644876 | 0.411079166 |
| Bap1 104416             | -1.120674402 | 0.161499799 | 1.008235911  | 0.460262594 |
| Gys1 14936              | -1.120687059 | 0.319624276 | -1.278205848 | 0.113120004 |
| Rrnad1 229503           | -1.120750454 | 0.246144524 | -1.042965897 | 0.394929665 |
| Sfrp5 54612             | -1.120830446 | 0.377816357 | -1.20151509  | 0.275095866 |
| Anxa7 11750             | -1.120844763 | 0.21028128  | -1.228298293 | 0.066689978 |
| Arhgef16 230972         | -1.120864797 | 0.375133176 | 1.137470391  | 0.352317177 |
| Llgl2 217325            | -1.12087657  | 0.089632227 | -1.168293475 | 0.038567949 |
| Kctd2 70382             | -1.120924891 | 0.171750789 | -1.041153185 | 0.347279844 |
| Stam 20844              | -1.120958159 | 0.366540253 | -1.407412725 | 0.159644715 |
| Pum1 80912              | -1.120959134 | 0.221670436 | -1.004999612 | 0.482024177 |
| Celsr2 53883            | -1.121040454 | 0.403316093 | -2.018776862 | 0.000360338 |
| Pde4d 238871            | -1.121050579 | 0.350047045 | 1.056857202  | 0.425085697 |
| Arhgap42 71544          | -1.121151144 | 0.356623951 | -1.096466413 | 0.369899751 |
| Calm1 12313             | -1.121171814 | 0.034529558 | -1.07357186  | 0.056897095 |
| Ppm1k 243382            | -1.121259441 | 0.328189506 | -1.053640658 | 0.406822385 |
| Des 13346               | -1.121293433 | 0.375013175 | 1.193024035  | 0.277546976 |
| Mesdc2 67943            | -1.121298227 | 0.242040948 | -1.225246557 | 0.076592633 |
| Slc35d2 70484           | -1.121331725 | 0.201538662 | -1.106050964 | 0.144065498 |
| Acot13 66834            | -1.121338002 | 0.290033446 | -1.321450426 | 0.065652141 |
| Tspan9 109246           | -1.121386156 | 0.210894407 | -1.057194397 | 0.299313326 |
| Arhgef19 213649         | -1.12144935  | 0.014744689 | -1.080901424 | 0.015488771 |
| Rian 75745              | -1.12145379  | 0.432737273 | -1.945954545 | 0.198949878 |
| B3galnt2 97884          | -1.121515267 | 0.250855677 | -1.121515267 | 0.250855677 |
| H2-T10 15024            | -1.121736851 | 0.36387237  | -1.11845961  | 0.334609079 |
| Wfikn1 215001           | -1.121743596 | 0.424947084 | 1.32508503   | 0.336299047 |
| Dpcd 226162             | -1.121822737 | 0.266126926 | -1.121822737 | 0.266126926 |

|                      |              |             |              |             |
|----------------------|--------------|-------------|--------------|-------------|
| Picalm 233489        | -1.121846955 | 0.312568141 | -1.121846955 | 0.312568141 |
| Chmp1a 234852        | -1.121880716 | 0.054149382 | -1.121880716 | 0.054149382 |
| Dpyd 99586           | -1.121957115 | 0.359951851 | -1.018005216 | 0.467709354 |
| 1300002K09Rik 74152  | -1.121972681 | 0.113285918 | -1.22449057  | 0.011678065 |
| Pelp1 75273          | -1.122099274 | 0.129305365 | -1.183560076 | 0.035784467 |
| Yes1 22612           | -1.12225743  | 0.373952467 | 1.34243224   | 0.14304793  |
| Ccdc77 67200         | -1.122340225 | 0.364982218 | -1.04443916  | 0.442129618 |
| Amacr 17117          | -1.122346032 | 0.14441648  | -1.112669858 | 0.128639674 |
| Gps1 209318          | -1.122366285 | 0.214792411 | -1.240349063 | 0.059564012 |
| Kirrel 170643        | -1.122413197 | 0.363517456 | -1.122413197 | 0.363517456 |
| Sirt6 50721          | -1.122471411 | 0.3260399   | -1.122471411 | 0.3260399   |
| Zfp937 245174        | -1.122558018 | 0.392333158 | -1.337399206 | 0.221360425 |
| Sltm 66660           | -1.12265571  | 0.210408296 | -1.007593303 | 0.470434448 |
| Polr3d 67065         | -1.122681868 | 0.25630204  | -1.020255948 | 0.448104731 |
| Ormdl3 66612         | -1.122783985 | 0.090199469 | -1.122783985 | 0.090199469 |
| Odf2l 52184          | -1.122823639 | 0.400869599 | 1.185489476  | 0.361115938 |
| Mtrf1 211253         | -1.122864442 | 0.263522989 | -1.290848336 | 0.06210249  |
| Arv1 68865           | -1.122932958 | 0.337325636 | 1.051178635  | 0.425139543 |
| Atxn1l 52335         | -1.123101042 | 0.37125026  | -1.099843164 | 0.38144427  |
| Wdr53 68980          | -1.123180513 | 0.287759952 | -1.017357748 | 0.463830904 |
| Zmym1 68310          | -1.123182012 | 0.448325546 | -2.093828795 | 0.230800024 |
| Dgat2 67800          | -1.123251752 | 0.036742491 | -1.123251752 | 0.036742491 |
| Sik3 70661           | -1.123294896 | 0.215515343 | 1.055744049  | 0.284015502 |
| Cpox 12892           | -1.123329221 | 0.314576528 | 1.17050691   | 0.179855171 |
| Mknk1 17346          | -1.123422927 | 0.157818139 | -1.188851554 | 0.055707375 |
| Aldh1b1 72535        | -1.123590546 | 0.271302789 | -1.28234821  | 0.009032072 |
| Cmtm6 67213          | -1.123641299 | 0.277189031 | 1.00146929   | 0.496181233 |
| Map2k3 26397         | -1.123658819 | 0.077408054 | -1.151540398 | 0.051130896 |
| Smoc1 64075          | -1.123698937 | 0.083074846 | -1.022519515 | 0.327810163 |
| Galns 50917          | -1.123731748 | 0.28642357  | -1.045962342 | 0.418980055 |
| Sfn 55948            | -1.123784775 | 0.313495221 | -1.238936951 | 0.139951889 |
| 1700056E22Rik 73363  | -1.123804584 | 0.416799005 | -1.123804584 | 0.416799005 |
| Qdpr 110391          | -1.123832538 | 0.073871212 | -1.026793734 | 0.271636516 |
| Plk5 216166          | -1.123836784 | 0.347453088 | 1.114140988  | 0.33253873  |
| Gria3 53623          | -1.123870601 | 0.352214085 | 1.173828244  | 0.216819089 |
| Pgam1 18648          | -1.123887364 | 0.240445556 | -1.026979065 | 0.426711257 |
| Tesk2 230661         | -1.123914132 | 0.296573355 | -1.25519318  | 0.118437698 |
| Wdr20a 69641         | -1.1239508   | 0.337118613 | 1.042488908  | 0.427309863 |
| Naprt1 223646        | -1.124068945 | 0.173965803 | -1.102042999 | 0.181490349 |
| 2410002I01Rik 78777  | -1.124118398 | 0.138245174 | -1.072890226 | 0.246516663 |
| Acpp 56318           | -1.124144623 | 0.337717996 | -1.32561556  | 0.166819216 |
| Tmem201 230917       | -1.124199024 | 0.164349834 | -1.056792385 | 0.310655478 |
| Smpdl3a 57319        | -1.124238309 | 0.242425066 | -1.1717565   | 0.1110096   |
| Usp28 235323         | -1.124268213 | 0.38633496  | -1.114026526 | 0.383537011 |
| 41156 18952          | -1.124395976 | 0.281750109 | -1.437746096 | 0.010492798 |
| Hgsnat 52120         | -1.124434655 | 0.231114065 | -1.124434655 | 0.231114065 |
| Hspa12a 73442        | -1.1244509   | 0.407447216 | -1.1244509   | 0.407447216 |
| 4732418C07Rik 230648 | -1.124488451 | 0.332846823 | -1.036605113 | 0.41383104  |
| Pdk2 18604           | -1.124512013 | 0.042556946 | -1.124512013 | 0.042556946 |
| Ldb2 16826           | -1.124544709 | 0.392030863 | 1.214013749  | 0.317406409 |
| Sigmar1 18391        | -1.124546607 | 0.065114763 | -1.067245027 | 0.123941211 |
| Rnpep 215615         | -1.124548317 | 0.288523875 | -1.010427342 | 0.475070477 |
| Zfp9 22750           | -1.124555529 | 0.381171211 | -1.618341986 | 0.084473199 |

|                      |              |             |              |             |
|----------------------|--------------|-------------|--------------|-------------|
| Ndufa9 66108         | -1.124581645 | 0.023054505 | -1.156298187 | 0.008761736 |
| 1700123O20Rik 58248  | -1.124733189 | 0.203040389 | -1.124733189 | 0.203040389 |
| Zfp592 233410        | -1.124746463 | 0.070905755 | -1.091746311 | 0.133147052 |
| Gnpda1 26384         | -1.124792522 | 0.192608251 | -1.124792522 | 0.192608251 |
| Top1mt 72960         | -1.124929468 | 0.217850178 | -1.124929468 | 0.217850178 |
| Itpripl1 73338       | -1.125003322 | 0.225702221 | -1.236753799 | 0.046299551 |
| Dnajb4 67035         | -1.125088974 | 0.327551046 | -1.281840232 | 0.190248173 |
| Cse1l 110750         | -1.125107954 | 0.155329312 | -1.125107954 | 0.155329312 |
| Pmpca 66865          | -1.125198444 | 0.067129275 | -1.203751584 | 0.001074403 |
| Zxdc 80292           | -1.125213459 | 0.125373738 | -1.054711518 | 0.25767408  |
| Eif4g3 230861        | -1.125252225 | 0.273089164 | -1.004227368 | 0.490719753 |
| Pccb 66904           | -1.125259315 | 0.023607845 | -1.129813196 | 0.000541698 |
| Ttc39b 69863         | -1.125282672 | 0.364049913 | -1.020403321 | 0.474559715 |
| Timd2 171284         | -1.125300192 | 0.163485541 | -1.055343428 | 0.306536612 |
| Uros 22276           | -1.125381256 | 0.212892509 | -1.125381256 | 0.212892509 |
| Cela1 109901         | -1.125468955 | 0.294622782 | -1.263825226 | 0.105675005 |
| Flywch1 224613       | -1.125488933 | 0.257342245 | -1.077467793 | 0.289277978 |
| Med24 23989          | -1.125491115 | 0.165597179 | -1.091983527 | 0.155129886 |
| 1110012L19Rik 68618  | -1.125517743 | 0.299899435 | -1.108637697 | 0.224855277 |
| Pisd-ps3 66776       | -1.125577849 | 0.384968935 | -1.125577849 | 0.384968935 |
| Pwwp2a 70802         | -1.125600654 | 0.386651969 | 1.392530321  | 0.164976997 |
| Glis2 83396          | -1.125605107 | 0.399446701 | 1.115665165  | 0.414499317 |
| Cpsf4l 52670         | -1.125681895 | 0.32120439  | -1.07139176  | 0.311755118 |
| Arhgap1 228359       | -1.125763773 | 0.209078025 | -1.125763773 | 0.209078025 |
| Extl3 54616          | -1.12577859  | 0.153863163 | -1.279193807 | 0.007252194 |
| Zfp36l2 12193        | -1.125819025 | 0.359654059 | -1.125819025 | 0.359654059 |
| 6430573F11Rik 319582 | -1.125856171 | 0.382569413 | 1.211482761  | 0.292589443 |
| Cyp4f13 170716       | -1.125873038 | 0.115715258 | -1.074087255 | 0.218147672 |
| Il15 16168           | -1.125875868 | 0.432950309 | -1.125875868 | 0.432950309 |
| Nit1 27045           | -1.125876408 | 0.098111017 | -1.083338137 | 0.186265117 |
| Ywhag 22628          | -1.125968422 | 0.316901894 | 1.05594067   | 0.39998909  |
| Sgsh 27029           | -1.125970547 | 0.245776959 | -1.030133208 | 0.423441428 |
| Enpep 13809          | -1.125977706 | 0.33186084  | -1.125977706 | 0.33186084  |
| Aldh3b2 621603       | -1.126026437 | 0.444041762 | -2.228922062 | 0.156240191 |
| Nus1 52014           | -1.126055695 | 0.315048459 | -1.127754876 | 0.258897602 |
| Phgdh 236539         | -1.126075381 | 0.440456384 | 1.823071741  | 0.250512967 |
| Runx2 12393          | -1.126077601 | 0.440378648 | -1.189393939 | 0.435388966 |
| Ccdc47 67163         | -1.126123449 | 0.258872635 | 1.010862485  | 0.470803909 |
| Fgfrl1 116701        | -1.126126764 | 0.279863732 | 1.004338821  | 0.490719026 |
| Ube3a 22215          | -1.126146512 | 0.283548651 | -1.016684751 | 0.468019769 |
| Fdxr 14149           | -1.126241524 | 0.136554157 | -1.18270796  | 0.054750624 |
| Ell2 192657          | -1.126283977 | 0.32143879  | 1.053080393  | 0.410792135 |
| 41158 56526          | -1.126326186 | 0.373372685 | -1.500607186 | 0.133601921 |
| Fbxo46 243867        | -1.126388829 | 0.22002063  | -1.124187172 | 0.194502338 |
| lrak1bp1 65099       | -1.126416032 | 0.431176197 | 1.019949115  | 0.487108385 |
| Cdkn2c 12580         | -1.12643792  | 0.270245714 | -1.410169777 | 0.016325183 |
| Fam134a 227298       | -1.12651328  | 0.03657762  | -1.14867282  | 0.005154056 |
| Farsa 66590          | -1.126587603 | 0.153905131 | -1.160788747 | 0.051279427 |
| Dlst 78920           | -1.126601608 | 0.150340143 | -1.000226837 | 0.498956496 |
| Topors 106021        | -1.126622248 | 0.287482158 | -1.089008123 | 0.262521427 |
| Pcmt1 319263         | -1.126686644 | 0.046842232 | -1.155745573 | 0.029570082 |
| 2210016L21Rik 72357  | -1.126695527 | 0.223668763 | -1.244269753 | 0.078158961 |
| Mll2 381022          | -1.126699203 | 0.262241653 | -1.038289945 | 0.391697677 |



|                      |              |             |              |             |
|----------------------|--------------|-------------|--------------|-------------|
| P2ry6 233571         | -1.126700443 | 0.342552256 | -1.345837425 | 0.166561399 |
| lvd 56357            | -1.12671613  | 0.040366786 | -1.162761661 | 0.001571457 |
| Tmcc3 319880         | -1.126811529 | 0.353393628 | 1.094152911  | 0.380857143 |
| Cbx7 52609           | -1.126843374 | 0.273526756 | -1.126843374 | 0.273526756 |
| Gm14057 100043766    | -1.126864877 | 0.399941675 | -2.054662098 | 0.009452415 |
| Rrp7a 74778          | -1.126871006 | 0.175595994 | -1.048103126 | 0.334338868 |
| Ap3m1 55946          | -1.126944567 | 0.211925013 | -1.093963083 | 0.21797025  |
| Dusp19 68082         | -1.126947809 | 0.326658168 | -1.294344714 | 0.125686807 |
| Glul 14645           | -1.126956041 | 0.226215396 | -1.066497868 | 0.206249765 |
| Polr1b 20017         | -1.12699484  | 0.23448992  | -1.23012049  | 0.112551958 |
| Cyfp1 20430          | -1.127053667 | 0.245302895 | -1.039856609 | 0.404218614 |
| Rsb1 242860          | -1.127159017 | 0.419620129 | -1.127159017 | 0.419620129 |
| 5730419I09Rik 74741  | -1.127264448 | 0.394440386 | -1.867827307 | 0.061123356 |
| Scaf8 106583         | -1.127318484 | 0.278996746 | -1.04845074  | 0.386904707 |
| Gng11 66066          | -1.127342473 | 0.316116521 | 1.002517909  | 0.496045375 |
| Mtus2 77521          | -1.127433032 | 0.400150048 | -1.127433032 | 0.400150048 |
| Nipal2 223473        | -1.127461982 | 0.454906509 | 3.53972      | 0.173296754 |
| Dars 226414          | -1.127550093 | 0.288375687 | 1.132476057  | 0.206159911 |
| 1810058I24Rik 67705  | -1.127598377 | 0.255366172 | -1.240389174 | 0.128755357 |
| Cfh 12628            | -1.127672517 | 0.316403156 | -1.420271729 | 0.043443876 |
| Prss23 76453         | -1.127676141 | 0.349245418 | -1.299564707 | 0.171055652 |
| Htra2 64704          | -1.127712703 | 0.211943852 | -1.127712703 | 0.211943852 |
| Col14a1 12818        | -1.127736316 | 0.123632467 | -1.086516376 | 0.138004321 |
| Iffo2 212632         | -1.127804076 | 0.259254165 | -1.226585335 | 0.120721515 |
| 3110052M02Rik 73229  | -1.127910262 | 0.327950949 | 1.177739464  | 0.225237487 |
| Iqcb1 320299         | -1.128081344 | 0.378656038 | -1.128081344 | 0.378656038 |
| Nudt8 66387          | -1.128085126 | 0.254076532 | -1.128085126 | 0.254076532 |
| Ski 20481            | -1.128101976 | 0.189810251 | 1.031521568  | 0.368635938 |
| 9430020K01Rik 240185 | -1.128160362 | 0.348681407 | -1.137279303 | 0.32665195  |
| Cuedc2 67116         | -1.128177954 | 0.306465385 | -1.167453968 | 0.174224216 |
| Cep120 225523        | -1.128306815 | 0.31180533  | 1.051256965  | 0.406624165 |
| Txnrd2 26462         | -1.128318073 | 0.131349949 | -1.101840888 | 0.197066097 |
| Abhd6 66082          | -1.128365865 | 0.146869219 | -1.209001155 | 0.04768349  |
| Ripk4 72388          | -1.128428711 | 0.324543843 | -1.128428711 | 0.324543843 |
| Pecr 111175          | -1.128505933 | 0.1299312   | -1.205986703 | 0.037037772 |
| Nkap 67050           | -1.128738511 | 0.303642123 | 1.035313616  | 0.433799624 |
| Rnf166 68718         | -1.128784369 | 0.185433074 | -1.300619521 | 0.016943857 |
| Eaf2 106389          | -1.128859423 | 0.430027993 | -1.128859423 | 0.430027993 |
| Clptm1 218335        | -1.12886586  | 0.197107704 | -1.239002972 | 0.059371039 |
| Nipsnap1 18082       | -1.128874078 | 0.047244043 | -1.097555029 | 0.053651095 |
| Fgfr4 14186          | -1.1289507   | 0.170698167 | -1.139634812 | 0.08148461  |
| Eftud1 101592        | -1.129121707 | 0.172129495 | -1.129121707 | 0.172129495 |
| Gabra3 14396         | -1.12920245  | 0.40716763  | 1.126302435  | 0.418408492 |
| Sharpin 106025       | -1.129225701 | 0.116452169 | -1.082482271 | 0.210114625 |
| Dcaf5 320808         | -1.129250124 | 0.096507923 | -1.129250124 | 0.096507923 |
| Coq10a 210582        | -1.129308668 | 0.169026224 | -1.221296418 | 0.026329177 |
| Nfy 18044            | -1.129545515 | 0.251835634 | -1.129545515 | 0.251835634 |
| Lrrc39 109245        | -1.129557327 | 0.41051774  | -1.650632238 | 0.134162752 |
| Slc30a10 226781      | -1.129628991 | 0.299279137 | -1.303483068 | 0.129686319 |
| Nudt9 74167          | -1.129709503 | 0.101443516 | -1.245354641 | 0.00100383  |
| Zfp873 408062        | -1.129749119 | 0.441537052 | -1.129749119 | 0.441537052 |
| Nbr1 17966           | -1.129776754 | 0.293596255 | 1.125211054  | 0.250815401 |
| Serinc1 56442        | -1.129782912 | 0.33235311  | -1.129782912 | 0.33235311  |

|                       |              |             |              |             |
|-----------------------|--------------|-------------|--------------|-------------|
| Glt1d1 319804         | -1.129801618 | 0.365265222 | -1.129801618 | 0.365265222 |
| Fen1 14156            | -1.129900684 | 0.302809548 | -1.278905045 | 0.111578371 |
| Alas1 11655           | -1.130041562 | 0.222710686 | -1.130041562 | 0.222710686 |
| 1500017E21Rik 668215  | -1.130066888 | 0.395422724 | -1.020189479 | 0.48121753  |
| Lpar1 14745           | -1.130143443 | 0.383129466 | 1.059119282  | 0.43821345  |
| Ppp1r18 76448         | -1.130178541 | 0.243659805 | -1.130178541 | 0.243659805 |
| Ruvbl2 20174          | -1.130241338 | 0.237985391 | -1.071462788 | 0.346371804 |
| Mon2 67074            | -1.130337815 | 0.251753051 | 1.096515409  | 0.215717819 |
| Antxr1 69538          | -1.130345595 | 0.415601497 | -1.752038658 | 0.191487955 |
| Lasp1 16796           | -1.130480782 | 0.139934316 | -1.287232195 | 0.002596342 |
| Capn2 12334           | -1.130490125 | 0.223904224 | -1.040372246 | 0.398920366 |
| Atp13a2 74772         | -1.130514872 | 0.19814597  | -1.208952855 | 0.052928921 |
| Lrp4 228357           | -1.130552182 | 0.208862533 | 1.04719127   | 0.323786483 |
| Suds3 71954           | -1.130589331 | 0.166091893 | -1.240051446 | 0.030951579 |
| Tsen34 66078          | -1.130623147 | 0.214952143 | -1.20047626  | 0.028825672 |
| Dicer1 192119         | -1.130713897 | 0.202197283 | -1.350738766 | 0.002303581 |
| Sumf2 67902           | -1.130746292 | 0.223865016 | -1.024011557 | 0.42803851  |
| Jak2 16452            | -1.130899384 | 0.319288304 | 1.093769784  | 0.321380968 |
| Gls2 216456           | -1.130918135 | 0.069900744 | -1.13649974  | 0.036734385 |
| Dnajc30 66114         | -1.130932334 | 0.17047947  | -1.130932334 | 0.17047947  |
| Eml1 68519            | -1.130986167 | 0.368186032 | 1.30872247   | 0.182853821 |
| Zfyve26 211978        | -1.131060466 | 0.331396481 | -1.570035714 | 0.026315579 |
| Cdkn1c 12577          | -1.131210948 | 0.236877891 | -1.131210948 | 0.236877891 |
| Cdk18 18557           | -1.131218402 | 0.066005687 | -1.046601969 | 0.233840576 |
| Eps8 13860            | -1.131229967 | 0.427901796 | -1.644270328 | 0.270433406 |
| Lman1 70361           | -1.131456962 | 0.044442818 | -1.083157072 | 0.088544579 |
| Wnt2 22413            | -1.13147936  | 0.210724132 | -1.211227132 | 0.095401491 |
| Tmprss6 71753         | -1.131571288 | 0.03268833  | -1.178805421 | 0.005921013 |
| B4galnt1 14421        | -1.131575439 | 0.220041315 | -1.131575439 | 0.220041315 |
| Lrch4-sap25 100316903 | -1.131610871 | 0.169214936 | -1.058738541 | 0.318419768 |
| Samd1 666704          | -1.131637643 | 0.213219738 | -1.149769885 | 0.090044964 |
| C330006K01Rik 231855  | -1.131707227 | 0.120907551 | -1.131707227 | 0.120907551 |
| Ict1 68572            | -1.131848388 | 0.254667868 | -1.388194332 | 0.019480607 |
| Tial1 21843           | -1.131951776 | 0.095305643 | -1.246331324 | 0.006555651 |
| Cxadr 13052           | -1.131984789 | 0.34164743  | 1.230380257  | 0.194503668 |
| Dmgdh 74129           | -1.132020887 | 0.178927827 | -1.031132766 | 0.355050903 |
| Ttll1 319953          | -1.132067005 | 0.177671394 | -1.056500986 | 0.331449043 |
| Pias2 17344           | -1.132215649 | 0.280646704 | 1.128969837  | 0.199752741 |
| Ankrd10 102334        | -1.132271221 | 0.306580946 | -1.265292231 | 0.188077619 |
| Cabin1 104248         | -1.132346499 | 0.168469077 | -1.132346499 | 0.168469077 |
| Arl6ip1 54208         | -1.132400874 | 0.120602634 | -1.270309539 | 0.004775009 |
| Tbcd 108903           | -1.13273972  | 0.180090626 | -1.268095699 | 0.01813744  |
| Muc6 353328           | -1.132764579 | 0.409235304 | 1.007102402  | 0.493733054 |
| Wdr48 67561           | -1.132817562 | 0.261191341 | -1.026156017 | 0.441085841 |
| Pold4 69745           | -1.132829847 | 0.210668731 | -1.124005296 | 0.131947371 |
| Herc3 73998           | -1.132836703 | 0.365930847 | -1.252004459 | 0.24414955  |
| Gpc4 14735            | -1.132891744 | 0.139985176 | -1.059605294 | 0.276526474 |
| Hecw2 329152          | -1.132927831 | 0.398729011 | -1.132927831 | 0.398729011 |
| Drg2 13495            | -1.132928995 | 0.162007103 | -1.26593806  | 0.017390833 |
| 1110018J18Rik 66129   | -1.132956573 | 0.347894294 | -1.073267078 | 0.399659848 |
| Mknk2 17347           | -1.132981174 | 0.120697106 | -1.034554669 | 0.348835999 |
| Rnf187 108660         | -1.133026941 | 0.022812895 | -1.125015077 | 0.010125195 |
| Akr1e1 56043          | -1.133090505 | 0.102992686 | -1.058586529 | 0.215383369 |

|                      |              |             |              |             |
|----------------------|--------------|-------------|--------------|-------------|
| Edem2 108687         | -1.133129162 | 0.232852816 | -1.040165504 | 0.382494085 |
| Zadh2 225791         | -1.133235519 | 0.15269846  | -1.052086533 | 0.312089591 |
| Cbx4 12418           | -1.133239343 | 0.28530537  | -1.329331267 | 0.087897154 |
| Ndel1 83431          | -1.133388397 | 0.174259895 | -1.174898071 | 0.136871923 |
| Chd8 67772           | -1.133388887 | 0.049750547 | -1.184657505 | 0.012368138 |
| Mettl3 56335         | -1.133404913 | 0.259434802 | -1.260827223 | 0.079376338 |
| P2rx3 228139         | -1.133530261 | 0.352604036 | -1.665530874 | 0.040568207 |
| Satb1 20230          | -1.133804209 | 0.415712326 | -1.133804209 | 0.415712326 |
| Ift140 106633        | -1.133833197 | 0.321026498 | -1.105935377 | 0.326258901 |
| Zzef1 195018         | -1.13383445  | 0.188664434 | -1.028670513 | 0.400253453 |
| Dhx38 64340          | -1.133845093 | 0.149721806 | -1.065401843 | 0.214685875 |
| Rbm34 52202          | -1.133845728 | 0.279307274 | -1.129661636 | 0.316815431 |
| Robo4 74144          | -1.133857089 | 0.058058133 | -1.231665106 | 0.001786416 |
| Pdcd5 56330          | -1.133864656 | 0.335821537 | -1.22850766  | 0.221966621 |
| Rab11fip5 52055      | -1.133932651 | 0.354784095 | -1.178328877 | 0.236343899 |
| Lypla2 26394         | -1.134014952 | 0.158642212 | -1.292138796 | 0.014282199 |
| Marcks1 17357        | -1.134034798 | 0.228439274 | -1.155911082 | 0.115653086 |
| Gopc 94221           | -1.13403967  | 0.334122835 | 1.111648637  | 0.324407348 |
| Ucp2 22228           | -1.134041556 | 0.25618736  | -1.046814205 | 0.3930023   |
| Arid4a 238247        | -1.134076018 | 0.382385738 | 1.315153646  | 0.17988282  |
| Klhl26 234378        | -1.134087957 | 0.175994304 | -1.222455321 | 0.072223854 |
| Ppp2r2a 71978        | -1.134106939 | 0.115665685 | -1.063282711 | 0.236358331 |
| 9930021J03Rik 240613 | -1.134199039 | 0.331656342 | -1.165743064 | 0.282376115 |
| Pth1r 19228          | -1.134343991 | 0.300989835 | -1.430711876 | 0.026677631 |
| Ufsp1 70240          | -1.134416947 | 0.346578075 | -1.450486524 | 0.11633724  |
| Zfp39 22698          | -1.134436482 | 0.250258803 | -1.114721453 | 0.170786184 |
| Ddx56 52513          | -1.134446893 | 0.154539733 | -1.134446893 | 0.154539733 |
| Cald1 109624         | -1.134453455 | 0.263693071 | 1.065567391  | 0.193706179 |
| Sod2 20656           | -1.134455384 | 0.088347799 | -1.187564764 | 0.038168919 |
| BC013529 215751      | -1.134522463 | 0.25196419  | -1.134522463 | 0.25196419  |
| Tagln 21345          | -1.134567987 | 0.393103596 | 1.411834307  | 0.13754153  |
| Lamp1 16783          | -1.134576682 | 0.062135531 | -1.234075732 | 0.002463852 |
| Eif3m 98221          | -1.134651232 | 0.159317055 | -1.119644885 | 0.117312518 |
| Tfg 21787            | -1.134658575 | 0.179585919 | -1.034061695 | 0.372547064 |
| Kcnk13 217826        | -1.134700727 | 0.442200703 | -2.496202829 | 0.207457753 |
| Tfdp2 211586         | -1.134701381 | 0.275741749 | -1.167143032 | 0.18380289  |
| Mapk14 26416         | -1.134762495 | 0.232813641 | 1.085569863  | 0.204252517 |
| Brd8 78656           | -1.134813166 | 0.333549781 | -1.355632656 | 0.160976795 |
| Ints12 71793         | -1.134857469 | 0.217269675 | -1.244394625 | 0.054475778 |
| Bbs9 319845          | -1.134942183 | 0.338442441 | -1.134942183 | 0.338442441 |
| Pip4k2c 117150       | -1.134951122 | 0.133948692 | -1.13668734  | 0.114959675 |
| 2810407C02Rik 69227  | -1.134993435 | 0.291270311 | -1.088930128 | 0.330290738 |
| E130311K13Rik 329659 | -1.135012697 | 0.273947508 | -1.201811947 | 0.199900593 |
| Cdc5l 71702          | -1.135061149 | 0.317842351 | 1.181796143  | 0.205550982 |
| Ndst2 17423          | -1.135086548 | 0.233550711 | -1.135086548 | 0.233550711 |
| Ext2 14043           | -1.135149886 | 0.180104057 | -1.135149886 | 0.180104057 |
| Zfp11 22648          | -1.135152291 | 0.416112499 | -1.135152291 | 0.416112499 |
| Snx30 209131         | -1.135282204 | 0.376661892 | -1.589116332 | 0.122662349 |
| Csde1 229663         | -1.135357328 | 0.027881508 | -1.214998647 | 0.000524543 |
| 1700081L11Rik 76719  | -1.135374459 | 0.287652886 | -1.135374459 | 0.287652886 |
| Rnf146 68031         | -1.135410794 | 0.24740996  | -1.135410794 | 0.24740996  |
| Plec 18810           | -1.135411049 | 0.077294351 | -1.220003009 | 0.003784441 |
| Ppp1r13l 333654      | -1.135465388 | 0.298338402 | 1.007138274  | 0.485922963 |

|                      |              |             |              |             |
|----------------------|--------------|-------------|--------------|-------------|
| Tbl3 213773          | -1.135595993 | 0.142860807 | -1.135595993 | 0.142860807 |
| Mtx3 382793          | -1.135671118 | 0.368599817 | 1.257777487  | 0.184938428 |
| Clic4 29876          | -1.135783283 | 0.321278796 | -1.162836788 | 0.268909974 |
| Actn4 60595          | -1.135797823 | 0.018855934 | -1.214593534 | 2.30107E-05 |
| 2610019F03Rik 72148  | -1.135832839 | 0.139687043 | -1.135832839 | 0.139687043 |
| C4a 625018           | -1.135845454 | 0.326526085 | -1.359778348 | 0.145729952 |
| Ramp1 51801          | -1.135860868 | 0.292716833 | -1.135860868 | 0.292716833 |
| Clec4f 51811         | -1.135972968 | 0.221955618 | -1.135972968 | 0.221955618 |
| Ctage5 217615        | -1.13598336  | 0.204133724 | -1.039880344 | 0.382224779 |
| Dgcr8 94223          | -1.136004942 | 0.338451015 | -1.203766156 | 0.245837124 |
| Zfp213 449521        | -1.136013073 | 0.278507212 | 1.127311041  | 0.197296125 |
| Alkbh4 72041         | -1.136014392 | 0.203962351 | -1.108755922 | 0.216000747 |
| Trip4 56404          | -1.136139703 | 0.147567084 | -1.318411841 | 0.001289949 |
| Acvr2a 11480         | -1.13619607  | 0.348586936 | 1.263451001  | 0.183831868 |
| Amotl2 56332         | -1.136391865 | 0.305742077 | -1.312231623 | 0.150575008 |
| Os9 216440           | -1.13646632  | 0.046684819 | -1.100268224 | 0.094214127 |
| Lace1 215951         | -1.136504701 | 0.186621635 | -1.136504701 | 0.186621635 |
| Tmem175 72392        | -1.136515943 | 0.182054503 | -1.320335468 | 0.006694627 |
| Cd47 16423           | -1.136564639 | 0.24176416  | -1.256388617 | 0.113305126 |
| Fbp1 14121           | -1.136578773 | 0.154473216 | -1.136578773 | 0.154473216 |
| Mprip 26936          | -1.136697182 | 0.163408163 | -1.230984955 | 0.025855795 |
| Caprin1 53872        | -1.136731466 | 0.26586932  | 1.049807569  | 0.343544053 |
| N6amt1 67768         | -1.136752801 | 0.265344682 | 1.106439808  | 0.24323116  |
| Rnf5 54197           | -1.136771281 | 0.03074469  | -1.136771281 | 0.03074469  |
| Ube3c 100763         | -1.136783184 | 0.188719667 | -1.346338388 | 0.006334173 |
| Dnttip2 99480        | -1.13678519  | 0.1728709   | -1.334893702 | 0.001425654 |
| Pcsk5 18552          | -1.136819893 | 0.271293872 | -1.01089869  | 0.475815053 |
| Rnf169 108937        | -1.13682626  | 0.160413894 | -1.13682626  | 0.160413894 |
| Rint1 72772          | -1.13693711  | 0.221004285 | -1.39921739  | 0.002459546 |
| Setd5 72895          | -1.136949665 | 0.262038377 | -1.083249257 | 0.310666388 |
| Srp72 66661          | -1.136983619 | 0.217626623 | -1.227359358 | 0.120246846 |
| 2500003M10Rik 66511  | -1.137077856 | 0.085509541 | -1.027550144 | 0.331851539 |
| Fkbp15 338355        | -1.137098494 | 0.129058564 | -1.067204218 | 0.259274221 |
| Cd151 12476          | -1.137141601 | 0.117243566 | -1.137141601 | 0.117243566 |
| Dhx34 71723          | -1.13721451  | 0.201669412 | -1.327683762 | 0.021208375 |
| BC089597 216454      | -1.137218912 | 0.108979007 | -1.286271223 | 0.001248067 |
| Bmp1 12153           | -1.137238064 | 0.057094132 | -1.14071815  | 0.015515601 |
| C130039O16Rik 238317 | -1.137248371 | 0.384226268 | 1.035228152  | 0.431137784 |
| Plscr3 70310         | -1.137537784 | 0.174806103 | -1.137537784 | 0.174806103 |
| Herc4 67345          | -1.137565625 | 0.300803871 | -1.167315669 | 0.204743749 |
| Cst3 13010           | -1.137571622 | 0.174194932 | -1.350184009 | 0.000998549 |
| Cyp2j6 13110         | -1.137719803 | 0.168259618 | -1.137719803 | 0.168259618 |
| C330007P06Rik 77644  | -1.137886397 | 0.369379614 | -1.247662714 | 0.236442985 |
| Hbxip 68576          | -1.137955079 | 0.231935362 | -1.137955079 | 0.231935362 |
| Cdh5 12562           | -1.137967664 | 0.174840879 | -1.253438053 | 0.040897929 |
| 1810049H13Rik 66431  | -1.138037118 | 0.21183949  | -1.241595292 | 0.062348279 |
| Mgst1 56615          | -1.138282212 | 0.26965     | -1.138282212 | 0.26965     |
| Nars 70223           | -1.138329394 | 0.222475839 | -1.138329394 | 0.222475839 |
| Faf2 76577           | -1.13841892  | 0.071239373 | -1.141479757 | 0.036816688 |
| Ces1c 13884          | -1.138443306 | 0.184058995 | -1.338958534 | 0.005307786 |
| Snx2 67804           | -1.138560941 | 0.230954597 | -1.138560941 | 0.230954597 |
| Prr13 66151          | -1.138626994 | 0.077329067 | -1.076464273 | 0.157970374 |
| Spna2 20740          | -1.138686237 | 0.180734699 | -1.20338617  | 0.055571186 |

|                |              |             |              |             |
|----------------|--------------|-------------|--------------|-------------|
| Creg1 433375   | -1.138699504 | 0.058497032 | -1.160213469 | 0.003809097 |
| Snx15 69024    | -1.138753953 | 0.171167369 | -1.197507558 | 0.095241481 |
| Mnd1 76915     | -1.138773058 | 0.389966684 | 1.041609332  | 0.460637096 |
| Plekha7 233765 | -1.138872749 | 0.332723898 | 1.051513129  | 0.415366679 |
| Scap 235623    | -1.138936319 | 0.141076862 | -1.176408607 | 0.039828773 |
| Tmem108 81907  | -1.138951612 | 0.397517401 | 1.206106086  | 0.360232862 |
| Dgcr2 13356    | -1.138972115 | 0.040957329 | -1.154258796 | 0.006724435 |
| Slc26a6 171429 | -1.138994658 | 0.364268792 | -1.138994658 | 0.364268792 |
| Unk 217331     | -1.139016564 | 0.18893093  | 1.022761231  | 0.422264164 |
| Mrps15 66407   | -1.139030439 | 0.186826937 | -1.051334367 | 0.347004821 |
| Lrrc56 70552   | -1.139080883 | 0.286235627 | -1.159133865 | 0.181514106 |
| Nipa1 233280   | -1.139122715 | 0.449250775 | 1            | #DIV/0!     |
| Chn2 69993     | -1.139156463 | 0.110172277 | -1.217995702 | 0.011102694 |
| Gpr19 14760    | -1.139331363 | 0.336674517 | 1.028612008  | 0.464411275 |
| Rad23b 19359   | -1.139349768 | 0.270835945 | -1.265772955 | 0.149848559 |
| Tymp 72962     | -1.139359998 | 0.118288414 | -1.112948743 | 0.081479642 |
| Paccin3 80708  | -1.139409999 | 0.120396599 | -1.139409999 | 0.120396599 |
| Add3 27360     | -1.13946068  | 0.330871943 | 1.051589876  | 0.413918428 |
| Clk3 102414    | -1.13955587  | 0.028013517 | -1.126017594 | 0.004455933 |
| Derl3 70377    | -1.139639724 | 0.412234677 | 1.540420252  | 0.205546211 |
| Fbxl12 30843   | -1.139761104 | 0.259561324 | -1.146601891 | 0.208542528 |
| Cdv3 321022    | -1.139781128 | 0.032323367 | -1.143695355 | 0.010437247 |
| Gramd1b 235283 | -1.139872053 | 0.356717025 | 1.048286062  | 0.438896362 |
| Fam38a 234839  | -1.139907233 | 0.314705659 | -1.139907233 | 0.314705659 |
| Fut8 53618     | -1.13992178  | 0.326246048 | -1.09385036  | 0.284946527 |
| Plagl2 54711   | -1.139940726 | 0.291000666 | -1.385071792 | 0.063855255 |
| Lysmd3 80289   | -1.140210788 | 0.396383829 | 1.566306725  | 0.136377964 |
| Kat2a 14534    | -1.140385264 | 0.155588335 | -1.210378458 | 0.081839968 |
| Cdk20 105278   | -1.140417439 | 0.213205444 | 1.000904151  | 0.496603461 |
| Zfp748 212276  | -1.140505828 | 0.376119548 | -1.775545616 | 0.048946904 |
| Ehd1 13660     | -1.140552534 | 0.13277586  | -1.227470992 | 0.016291718 |
| Zfp617 170938  | -1.140568581 | 0.312097831 | 1.051010115  | 0.417171428 |
| Ednra 13617    | -1.140626544 | 0.315256149 | -1.309420458 | 0.125081933 |
| Nmt1 18107     | -1.140680744 | 0.125872418 | -1.025289167 | 0.38664493  |
| Cobll1 319876  | -1.140713966 | 0.365933938 | 1.227555901  | 0.242718978 |
| Neo1 18007     | -1.140750078 | 0.240752249 | -1.140750078 | 0.240752249 |
| Zfp12 231866   | -1.140794759 | 0.299879454 | -1.318240157 | 0.145665051 |
| Ccnk 12454     | -1.14082213  | 0.160353379 | -1.067674932 | 0.30090779  |
| Creb3l2 208647 | -1.140913711 | 0.293117826 | 1.153042304  | 0.197781944 |
| Snx4 69150     | -1.140920587 | 0.230211707 | -1.140920587 | 0.230211707 |
| Ascc3 77987    | -1.141003448 | 0.370346986 | -1.471901734 | 0.183331372 |
| Mob3c 100465   | -1.141018611 | 0.206321021 | -1.008072812 | 0.471016644 |
| Zbtb44 235132  | -1.141114066 | 0.239707803 | -1.080099274 | 0.343242268 |
| Dab2ip 69601   | -1.141296449 | 0.230729621 | -1.243302741 | 0.093033739 |
| Parp6 67287    | -1.141393929 | 0.219523713 | -1.191263034 | 0.178016689 |
| Prrc2b 227723  | -1.141472975 | 0.184230462 | -1.014996824 | 0.435373717 |
| Daam1 208846   | -1.141553059 | 0.290636539 | 1.021979492  | 0.430452412 |
| Mib2 76580     | -1.141554356 | 0.135188963 | -1.239229829 | 0.029473841 |
| Harbi1 241547  | -1.141557987 | 0.187351622 | -1.086259438 | 0.29798126  |
| Sdc2 15529     | -1.141564122 | 0.054619655 | -1.141564122 | 0.054619655 |
| Sh3bp4 98402   | -1.141568873 | 0.381726151 | -1.710439162 | 0.102883955 |
| Pmepa1 65112   | -1.141587214 | 0.346818747 | -1.617651277 | 0.032637354 |
| Tstd1 226654   | -1.141623219 | 0.335910819 | -1.530611218 | 0.054929859 |

|                     |              |             |              |             |
|---------------------|--------------|-------------|--------------|-------------|
| Mup3 17842          | -1.141654677 | 0.290551453 | -1.016486525 | 0.469909517 |
| Rxbj 20182          | -1.141718617 | 0.102648269 | -1.263815556 | 0.000607395 |
| Eif4g1 208643       | -1.142025136 | 0.107225448 | -1.219907386 | 0.01212509  |
| Cryab 12955         | -1.142463382 | 0.243029613 | -1.300765861 | 0.078616841 |
| Rhbdd2 215160       | -1.142574976 | 0.143723157 | -1.228837359 | 0.050998899 |
| Cdk8 264064         | -1.142630116 | 0.178937195 | 1.026987645  | 0.395632546 |
| Flot2 14252         | -1.142685233 | 0.033624406 | -1.149294944 | 0.001583992 |
| Ptcd2 68927         | -1.142747416 | 0.192757352 | -1.250372309 | 0.075204349 |
| Tlk1 228012         | -1.142841931 | 0.274365503 | -1.319011337 | 0.107513527 |
| Stk11ip 71728       | -1.142885738 | 0.24671177  | -1.142885738 | 0.24671177  |
| Lama5 16776         | -1.142890685 | 0.339606624 | 1.086698897  | 0.390104068 |
| Arl4c 320982        | -1.142892769 | 0.31976724  | -1.315738595 | 0.132380239 |
| Trip10 106628       | -1.142903005 | 0.155782167 | -1.142903005 | 0.155782167 |
| Ap3b1 11774         | -1.142947672 | 0.229491283 | 1.058978882  | 0.339951412 |
| Mup4 17843          | -1.142993497 | 0.335173381 | -1.142993497 | 0.335173381 |
| Fxyd5 18301         | -1.143004711 | 0.33343068  | -1.208470295 | 0.135523872 |
| Usp21 30941         | -1.143224492 | 0.251200073 | 1.065722486  | 0.342274469 |
| Ercc5 22592         | -1.143232436 | 0.239356033 | -1.092277851 | 0.277407316 |
| Trub1 72133         | -1.143400717 | 0.22079009  | -1.26556991  | 0.049698401 |
| Zcwpw1 381678       | -1.14344808  | 0.242482606 | 1.075230772  | 0.308714907 |
| Gldc 104174         | -1.143463079 | 0.087179321 | -1.210788187 | 0.026445302 |
| Stau1 20853         | -1.143477913 | 0.128352312 | -1.111699134 | 0.111728869 |
| Cox8a 12868         | -1.143501496 | 0.160641724 | -1.155467148 | 0.023322134 |
| Edem1 192193        | -1.143638407 | 0.130346612 | -1.214204026 | 0.05891254  |
| Reep2 225362        | -1.143658515 | 0.423179243 | -1.388175758 | 0.348733614 |
| Zfp362 230761       | -1.143789153 | 0.227718972 | 1.088858898  | 0.19298302  |
| Cops7a 26894        | -1.143871356 | 0.06999339  | -1.198166329 | 0.027261198 |
| Zfp719 210105       | -1.143955518 | 0.305903155 | 1.043258344  | 0.411875818 |
| Ahnak 66395         | -1.143958384 | 0.296065052 | 1.02518847   | 0.448162695 |
| 3110001D03Rik 66928 | -1.144035943 | 0.23735536  | -1.097382393 | 0.153065078 |
| Spns2 216892        | -1.144054399 | 0.197551291 | -1.069175644 | 0.328930045 |
| Dhx15 13204         | -1.144059018 | 0.372788889 | 1.218797108  | 0.29202777  |
| Tmem126b 68472      | -1.144100593 | 0.251300083 | -1.281697775 | 0.067207804 |
| Eci1 13177          | -1.144148932 | 0.110125136 | -1.193258177 | 0.067812473 |
| Mdh2 17448          | -1.144155083 | 0.120681014 | -1.19746712  | 0.072325862 |
| Hat1 107435         | -1.144192351 | 0.207015357 | -1.182200401 | 0.088317863 |
| Ddx20 53975         | -1.144222915 | 0.289099703 | -1.282910264 | 0.12610188  |
| Rnf181 66510        | -1.144341223 | 0.074966186 | -1.13762249  | 0.041353942 |
| Man2b1 17159        | -1.144356982 | 0.101480992 | -1.144356982 | 0.101480992 |
| Secisbp2 70354      | -1.144447257 | 0.387821351 | 1.354448678  | 0.209879511 |
| Btla 208154         | -1.144506226 | 0.40952252  | -1.744207205 | 0.204556877 |
| Smg6 103677         | -1.144509748 | 0.061667771 | -1.152912406 | 0.025950902 |
| Dnajb12 56709       | -1.14456848  | 0.230409748 | -1.14456848  | 0.230409748 |
| Anapc2 99152        | -1.144686246 | 0.092410776 | -1.073827767 | 0.190377298 |
| Galnt2 108148       | -1.144759868 | 0.107653707 | -1.091177086 | 0.199637125 |
| Mpi 110119          | -1.144777931 | 0.135447941 | -1.187096385 | 0.090640808 |
| Prr5 109270         | -1.144819067 | 0.129205382 | -1.217967285 | 0.055503714 |
| Gm5801 545056       | -1.144827366 | 0.216339239 | -1.144827366 | 0.216339239 |
| Csf2ra 12982        | -1.144852634 | 0.183380067 | 1.028282128  | 0.392904514 |
| Bmper 73230         | -1.144865632 | 0.364954544 | 1.147114806  | 0.355397339 |
| Zfp597 71063        | -1.144873458 | 0.377187305 | 1.37991754   | 0.196734113 |
| Gucy1b3 54195       | -1.144890383 | 0.345397087 | -1.144890383 | 0.345397087 |
| Wrnip1 78903        | -1.144944016 | 0.305636627 | -1.239920753 | 0.171477914 |

|                        |              |             |              |             |
|------------------------|--------------|-------------|--------------|-------------|
| LOC100048885 100048885 | -1.145049105 | 0.308750643 | 1.028810918  | 0.447064484 |
| Wdr73 71968            | -1.145139514 | 0.188216301 | -1.045663913 | 0.370544019 |
| Brpf1 78783            | -1.145177851 | 0.287692563 | -1.145177851 | 0.287692563 |
| Agphd1 235386          | -1.145202691 | 0.14774681  | -1.209772931 | 0.017186641 |
| Sec14l1 74136          | -1.145273336 | 0.139210735 | -1.317692475 | 0.005200871 |
| Slc25a42 73095         | -1.145306871 | 0.179663175 | -1.219015416 | 0.106133929 |
| Arhgef15 442801        | -1.145429696 | 0.110213413 | -1.090114463 | 0.109995281 |
| Lrrc4c 241568          | -1.145492174 | 0.38160925  | 1.037918822  | 0.464623131 |
| Triobp 110253          | -1.145503714 | 0.140511326 | -1.004119465 | 0.482316056 |
| Dgka 13139             | -1.145546634 | 0.247674085 | -1.040273236 | 0.413873265 |
| Zfp507 668501          | -1.145884764 | 0.373993639 | -1.000287516 | 0.49960416  |
| Akap10 56697           | -1.14589903  | 0.228114245 | 1.057886726  | 0.34439983  |
| Jak1 16451             | -1.145908976 | 0.184119564 | -1.145908976 | 0.184119564 |
| Mfsd1 66868            | -1.145970412 | 0.192854234 | -1.145970412 | 0.192854234 |
| Elavl1 15568           | -1.146003141 | 0.18094289  | -1.226380314 | 0.074793123 |
| Rbck1 24105            | -1.14603018  | 0.079534762 | -1.029601669 | 0.315653904 |
| Zcchc7 319885          | -1.146087134 | 0.077051889 | -1.103308073 | 0.145262518 |
| Ccdc17 622665          | -1.146204844 | 0.330758665 | 1.286104704  | 0.080442928 |
| 8430427H17Rik 329540   | -1.146487924 | 0.363928704 | -1.369979024 | 0.177288338 |
| Pcgf3 69587            | -1.146548297 | 0.33627721  | 1.257463855  | 0.173022365 |
| 1700034H15Rik 98736    | -1.146708542 | 0.41153122  | -1.119758182 | 0.433120414 |
| Atad3a 108888          | -1.146714778 | 0.044320466 | -1.132128124 | 0.021137268 |
| Prmt6 99890            | -1.146719367 | 0.269224257 | -1.482388997 | 0.015656614 |
| Ssh1 231637            | -1.146735065 | 0.261476003 | -1.242569371 | 0.133274251 |
| Zfp524 66056           | -1.146792524 | 0.233748104 | -1.40664698  | 0.017966376 |
| Plekhj1 78670          | -1.146922707 | 0.212229521 | -1.277862593 | 0.075376998 |
| Ppib 19035             | -1.146955288 | 0.284014477 | 1.027940229  | 0.446549547 |
| Tbck 271981            | -1.147036728 | 0.410030439 | 1.33785939   | 0.324957439 |
| Kcnk5 16529            | -1.147297427 | 0.221067818 | -1.210730256 | 0.105790385 |
| Rasa3 19414            | -1.14737974  | 0.330483185 | -1.461681265 | 0.107014632 |
| Tpt1p 497210           | -1.147429297 | 0.385506004 | -1.657770148 | 0.156327277 |
| Fam122b 78755          | -1.147535211 | 0.425886284 | 1.58181987   | 0.137083841 |
| Mrps7 50529            | -1.147571427 | 0.063690111 | -1.166955444 | 0.008849942 |
| Spry4 24066            | -1.147585922 | 0.363193167 | 1.379181862  | 0.136127649 |
| Pus10 74467            | -1.147821591 | 0.209233263 | -1.17340694  | 0.145183981 |
| Abhd11 68758           | -1.147904438 | 0.215869262 | -1.260249417 | 0.102581289 |
| Wtap 60532             | -1.147973178 | 0.300417332 | 1.048418759  | 0.416809051 |
| Tmx3 67988             | -1.148045003 | 0.324338743 | -1.148045003 | 0.324338743 |
| Csnk1a1 93687          | -1.148062149 | 0.32251052  | 1.076264604  | 0.389635015 |
| Katnb1 74187           | -1.148063547 | 0.371098573 | 1.041995671  | 0.456854218 |
| Coq6 217707            | -1.148066968 | 0.216776687 | -1.052946311 | 0.381851722 |
| 9530082P21Rik 638247   | -1.148089596 | 0.331458462 | -1.503802735 | 0.082092828 |
| Rbm5 83486             | -1.14821891  | 0.178841764 | -1.118295049 | 0.169462906 |
| Dlg3 53310             | -1.148227632 | 0.141172977 | -1.148227632 | 0.141172977 |
| Tgfbr1 21812           | -1.148376851 | 0.302530432 | -1.510545982 | 0.02392281  |
| Zfp598 213753          | -1.14839441  | 0.039532492 | -1.188992013 | 0.01880901  |
| Aspg 104816            | -1.148431978 | 0.059290595 | -1.197471253 | 0.026192839 |
| 5430437P03Rik 68251    | -1.148447604 | 0.066403367 | -1.148447604 | 0.066403367 |
| Wbp2 22378             | -1.148461016 | 0.031260269 | -1.070325974 | 0.105625463 |
| Mecp2 17257            | -1.148500503 | 0.106628554 | -1.196391691 | 0.068220576 |
| Zfp346 26919           | -1.148554767 | 0.308164918 | -1.077344851 | 0.343082257 |
| Atrx 22589             | -1.148567992 | 0.366292972 | 1.151955722  | 0.286911578 |
| Cd164 53599            | -1.14863849  | 0.278827098 | -1.131609241 | 0.224913139 |

|                     |              |             |              |             |
|---------------------|--------------|-------------|--------------|-------------|
| Crlf3 54394         | -1.148684142 | 0.346241112 | 1.100234491  | 0.385798037 |
| Man2b2 17160        | -1.148845153 | 0.06665946  | -1.276320374 | 0.000877188 |
| Setd2 235626        | -1.148854233 | 0.265113199 | -1.148854233 | 0.265113199 |
| Ltbp4 108075        | -1.148886506 | 0.120878183 | -1.309528162 | 0.00498277  |
| Ahdc1 230793        | -1.148890113 | 0.211615044 | -1.032353572 | 0.416587824 |
| Drosha 14000        | -1.149022245 | 0.158338794 | 1.037908715  | 0.199533928 |
| Ikbkg 16151         | -1.149056042 | 0.267932666 | 1.035849867  | 0.41554003  |
| Dclre1a 55947       | -1.149108179 | 0.250665419 | -1.005380537 | 0.486419555 |
| 1810014B01Rik 66263 | -1.149155354 | 0.293355391 | -1.296633228 | 0.066715438 |
| AW146020 330361     | -1.149219239 | 0.415262063 | -1.885842894 | 0.201181342 |
| Adh4 26876          | -1.149221319 | 0.244466649 | -1.291637149 | 0.107577684 |
| Rap1gds1 229877     | -1.149246367 | 0.204137495 | 1.03969265   | 0.371489325 |
| 281042815Rik 66462  | -1.149333352 | 0.283223097 | -1.383163296 | 0.078700781 |
| Selenbp1 20341      | -1.149369108 | 0.13215758  | -1.11843064  | 0.120608643 |
| Telo2 71718         | -1.149401141 | 0.278510783 | -1.149401141 | 0.278510783 |
| Ctcf 13018          | -1.149412836 | 0.273382554 | -1.170335837 | 0.229013589 |
| Agtr1a 11607        | -1.149413176 | 0.286199305 | -1.340800218 | 0.122554291 |
| Gps2 56310          | -1.149460585 | 0.229338385 | -1.252792226 | 0.131230851 |
| Dpp9 224897         | -1.149478356 | 0.019686978 | -1.194705793 | 0.001552019 |
| Nfe2l2 18024        | -1.149610195 | 0.191528054 | -1.278096308 | 0.057343859 |
| Sort1 20661         | -1.14962437  | 0.323906138 | -1.14962437  | 0.323906138 |
| 4930455C21Rik 76916 | -1.149628668 | 0.208506957 | -1.2632029   | 0.094096176 |
| Mup9 100038948      | -1.14965703  | 0.387753062 | -1.14965703  | 0.387753062 |
| Ghdc 80860          | -1.149698889 | 0.11179714  | -1.149698889 | 0.11179714  |
| Gcsh 68133          | -1.149741379 | 0.053731559 | -1.119295834 | 0.100135838 |
| Frk 14302           | -1.149754461 | 0.308880418 | -1.149754461 | 0.308880418 |
| Tmem143 70209       | -1.149783691 | 0.133846529 | -1.067743449 | 0.273148702 |
| Dkk3 50781          | -1.14978411  | 0.358203135 | -1.285947424 | 0.246566367 |
| Taf2 319944         | -1.149797312 | 0.259736004 | -1.019067715 | 0.463358302 |
| Spint1 20732        | -1.149823433 | 0.362841143 | -1.149823433 | 0.362841143 |
| Mmgt1 236792        | -1.14988955  | 0.155434303 | -1.14988955  | 0.155434303 |
| Dopey2 70028        | -1.149901327 | 0.124361634 | -1.23507885  | 0.040953128 |
| Pkp4 227937         | -1.149916917 | 0.059351838 | -1.149916917 | 0.059351838 |
| Fam135a 68187       | -1.149993649 | 0.353924658 | 1.097739454  | 0.399435267 |
| Cadm3 94332         | -1.150018035 | 0.21204751  | -1.150018035 | 0.21204751  |
| Dusp14 56405        | -1.150062762 | 0.389395094 | 1.218096211  | 0.348431201 |
| Agbl5 231093        | -1.150153124 | 0.299611528 | -1.087792983 | 0.29487494  |
| C1s 50908           | -1.150182813 | 0.107209311 | -1.150182813 | 0.107209311 |
| Tmem184b 223693     | -1.150208155 | 0.112561588 | -1.081219606 | 0.22606109  |
| Pi4k2a 84095        | -1.15021615  | 0.09284927  | -1.15021615  | 0.09284927  |
| Vapb 56491          | -1.150253521 | 0.004897886 | -1.209467798 | 0.00017856  |
| 41167 93684         | -1.150315321 | 0.098326263 | -1.158487869 | 0.025637274 |
| Slc5a1 20537        | -1.150386258 | 0.402282081 | -1.900662917 | 0.146212747 |
| Cd79b 15985         | -1.150397222 | 0.306410896 | 1.039921733  | 0.438316835 |
| Jup 16480           | -1.150419772 | 0.103359746 | -1.103262744 | 0.184256567 |
| Polr3k 67005        | -1.150419914 | 0.179453716 | -1.060058307 | 0.33184477  |
| Akna 100182         | -1.150430117 | 0.334321318 | -1.163492475 | 0.316885893 |
| Wdr67 210544        | -1.150502429 | 0.33268739  | -1.150502429 | 0.33268739  |
| Fundc1 72018        | -1.150582346 | 0.301523931 | -1.171429784 | 0.196543705 |
| Dram2 67171         | -1.150678347 | 0.159671926 | -1.06502352  | 0.311408578 |
| Sec31a 69162        | -1.150715722 | 0.066692578 | -1.197964708 | 0.034609586 |
| Cdc34 216150        | -1.150758297 | 0.181887912 | -1.26842636  | 0.060245905 |
| Hiat1 15247         | -1.150760989 | 0.306764126 | 1.213560973  | 0.132185143 |



|                     |              |             |              |             |
|---------------------|--------------|-------------|--------------|-------------|
| Rabggta 56187       | -1.150781359 | 0.077259359 | -1.150781359 | 0.077259359 |
| Thap11 59016        | -1.150786864 | 0.180699614 | -1.107605002 | 0.268462147 |
| Whrn 73750          | -1.150892248 | 0.386689887 | -1.690303969 | 0.15651159  |
| Slc25a27 74011      | -1.150906331 | 0.355395721 | -1.50936067  | 0.147740833 |
| Irs2 384783         | -1.150910357 | 0.396671394 | -1.422814123 | 0.285911479 |
| Kbtbd10 228003      | -1.151057271 | 0.389850522 | -1.171381302 | 0.374052799 |
| Rab18 19330         | -1.151193892 | 0.33337235  | 1.094967272  | 0.37757938  |
| Unc93a 381058       | -1.151194528 | 0.307051885 | -1.151194528 | 0.307051885 |
| Dgcr14 27886        | -1.151418452 | 0.219816797 | -1.069252986 | 0.351803439 |
| Clcn3 12725         | -1.151436497 | 0.313680442 | -1.151436497 | 0.313680442 |
| Rhbdd1 76867        | -1.151494507 | 0.305723109 | -1.062763785 | 0.399372141 |
| Stk25 59041         | -1.151658658 | 0.123472941 | -1.151658658 | 0.123472941 |
| Atl3 109168         | -1.151676963 | 0.33176992  | 1.064605293  | 0.332012213 |
| Thap2 66816         | -1.151707494 | 0.317231276 | -1.151707494 | 0.317231276 |
| Mbtps1 56453        | -1.15172631  | 0.083229891 | -1.228906737 | 0.019079866 |
| 1700052N19Rik 73419 | -1.151819338 | 0.271819237 | -1.234959288 | 0.051277233 |
| Atf5 107503         | -1.151901488 | 0.041231471 | -1.056402161 | 0.13112791  |
| Cdk5rap1 66971      | -1.151958295 | 0.342233555 | -1.217230767 | 0.199081259 |
| Slc27a3 26568       | -1.151959663 | 0.388317052 | -1.151959663 | 0.388317052 |
| Hp1bp3 15441        | -1.151987459 | 0.189349704 | -1.151987459 | 0.189349704 |
| Socs2 216233        | -1.152021495 | 0.253251778 | 1.099619841  | 0.264742955 |
| Smn1 20595          | -1.152084917 | 0.225030251 | -1.033612164 | 0.423433986 |
| Arhgdib 11857       | -1.152209652 | 0.206987602 | -1.221248005 | 0.069185417 |
| Pex10 668173        | -1.152271972 | 0.282805963 | -1.507194248 | 0.03444451  |
| Avl9 78937          | -1.15235039  | 0.373866968 | -1.15235039  | 0.373866968 |
| 1700088E04Rik 27660 | -1.152362425 | 0.434776335 | 2.057220559  | 0.233247321 |
| Stard8 236920       | -1.152387308 | 0.237687063 | -1.080379261 | 0.349600214 |
| Apol9a 223672       | -1.15239813  | 0.318555646 | -1.342565522 | 0.04711098  |
| Agt 11606           | -1.152413358 | 0.188457832 | -1.152413358 | 0.188457832 |
| Usp45 77593         | -1.152531908 | 0.359040437 | 1.088475023  | 0.41623425  |
| Mus81 71711         | -1.152612899 | 0.222678324 | -1.297970689 | 0.079750569 |
| Mrc1 17533          | -1.152696012 | 0.322874964 | -1.093665351 | 0.375518123 |
| Dyrk1b 13549        | -1.152842903 | 0.165555322 | -1.279193606 | 0.036768298 |
| Serpib9 20723       | -1.152945451 | 0.379516421 | -1.140071799 | 0.37638299  |
| Lrrc14b 432779      | -1.153002925 | 0.377471067 | -1.562477748 | 0.143283389 |
| Fbxl8 50788         | -1.153009593 | 0.292238956 | -1.358307991 | 0.082787208 |
| Ppfbp1 67533        | -1.153041831 | 0.340673405 | 1.128250554  | 0.342066797 |
| Cldn5 12741         | -1.153046895 | 0.169491619 | -1.082145295 | 0.229962103 |
| Fbxl3 50789         | -1.153066402 | 0.357840272 | 1.16422311   | 0.331617921 |
| Fntb 110606         | -1.153147535 | 0.270333433 | 1.005206343  | 0.488423955 |
| Ets1 23871          | -1.153185913 | 0.338495527 | -1.096931088 | 0.387272839 |
| Gng5 14707          | -1.153190304 | 0.182230693 | -1.063042415 | 0.339858528 |
| Fgfr2 14183         | -1.15319062  | 0.29160593  | 1.056350758  | 0.394006749 |
| Abhd3 106861        | -1.153206114 | 0.251359894 | 1.093299548  | 0.28161473  |
| Gal3st4 330217      | -1.153208457 | 0.381579194 | -1.364037215 | 0.240311046 |
| Ar 11835            | -1.153327842 | 0.428102672 | -1.189393939 | 0.435388966 |
| Dnpep 13437         | -1.153448789 | 0.19244842  | 1.00971019   | 0.470737235 |
| Tet2 214133         | -1.153480849 | 0.336136294 | 1.022313039  | 0.457477749 |
| Hk2 15277           | -1.153494442 | 0.301304945 | -1.283604224 | 0.171978873 |
| Dnajc22 72778       | -1.153536707 | 0.182388884 | -1.170346291 | 0.100155869 |
| Ndufv3 78330        | -1.153655261 | 0.261597225 | -1.163265252 | 0.160643208 |
| Ift57 73916         | -1.153747837 | 0.368372057 | 1.031484346  | 0.468331887 |
| Sirt3 64384         | -1.153914723 | 0.046537817 | -1.061626441 | 0.163857255 |

|                   |              |             |              |             |
|-------------------|--------------|-------------|--------------|-------------|
| Sdha 66945        | -1.153944311 | 0.100533321 | -1.153944311 | 0.100533321 |
| Ireb2 64602       | -1.153976412 | 0.308535755 | -1.153976412 | 0.308535755 |
| Ndufa10 67273     | -1.153988254 | 0.069006991 | -1.153988254 | 0.069006991 |
| Sh3pxd2a 14218    | -1.154001035 | 0.282545241 | -1.152996237 | 0.279768153 |
| Ropn1 252967      | -1.15400662  | 0.307853495 | -1.505819838 | 0.044426904 |
| Bzrap1 207777     | -1.154013868 | 0.441341423 | -2.019707773 | 0.301117079 |
| Luc7l3 67684      | -1.154052116 | 0.107757902 | -1.154052116 | 0.107757902 |
| Necap1 67602      | -1.154069772 | 0.175399981 | -1.258748868 | 0.03885567  |
| Snf8 27681        | -1.154090198 | 0.22956807  | -1.154090198 | 0.22956807  |
| Flot1 14251       | -1.154110322 | 0.175949241 | -1.061802667 | 0.336331189 |
| Dedd 21945        | -1.154134975 | 0.164413406 | -1.292327787 | 0.025906494 |
| Pcdh12 53601      | -1.154211354 | 0.204083036 | -1.154211354 | 0.204083036 |
| Aggf1 66549       | -1.154272522 | 0.24090962  | -1.154272522 | 0.24090962  |
| B2m 12010         | -1.154324232 | 0.045830851 | -1.154324232 | 0.045830851 |
| Hps6 20170        | -1.154340639 | 0.180625045 | -1.278957248 | 0.021400426 |
| Zdhhc18 503610    | -1.154524287 | 0.106686066 | -1.071597769 | 0.223634509 |
| Actr1a 54130      | -1.154548761 | 0.007382571 | -1.154548761 | 0.007382571 |
| Fmnl3 22379       | -1.154549738 | 0.213000424 | -1.25133017  | 0.093432568 |
| Pcsk4 18551       | -1.154550167 | 0.118294789 | -1.068745944 | 0.148691555 |
| Camta2 216874     | -1.154582237 | 0.173356415 | -1.253220846 | 0.046094068 |
| Exd2 97827        | -1.154607072 | 0.325485074 | -1.214334731 | 0.241237746 |
| Thap1 73754       | -1.154854219 | 0.147349403 | -1.213296142 | 0.098008094 |
| Zfp512 269639     | -1.154896193 | 0.162198037 | -1.347427386 | 0.011727475 |
| Enpp1 18605       | -1.154907893 | 0.055017282 | -1.198853969 | 0.015410468 |
| Flii 14248        | -1.154936791 | 0.10038775  | -1.154936791 | 0.10038775  |
| Myd88 17874       | -1.154953812 | 0.169131474 | -1.154953812 | 0.169131474 |
| Tm9sf1 74140      | -1.155062637 | 0.101963897 | -1.100668978 | 0.188472594 |
| Rbm43 71684       | -1.155227084 | 0.288725621 | -1.143265429 | 0.258167098 |
| Tmem14c 66154     | -1.155250611 | 0.076277397 | -1.195712905 | 0.051682336 |
| Ergic1 67458      | -1.155292699 | 0.070739495 | -1.04349732  | 0.22095551  |
| Usp48 170707      | -1.155314069 | 0.104975137 | -1.098284189 | 0.195194948 |
| Dcun1d2 102323    | -1.155336242 | 0.236734684 | -1.067010737 | 0.377815348 |
| Carm1 59035       | -1.155573994 | 0.097071889 | -1.216153709 | 0.033553322 |
| Gm5512 433224     | -1.155618211 | 0.201834671 | -1.025112354 | 0.428055632 |
| Cpn1 93721        | -1.155659732 | 0.141327476 | -1.126787965 | 0.132269294 |
| Gm17762 100034739 | -1.155818633 | 0.41765293  | -2.020751923 | 0.197627689 |
| Ccdc61 232933     | -1.156088849 | 0.231764048 | -1.1991222   | 0.084683117 |
| Zfp697 242109     | -1.156198406 | 0.285574897 | 1.168744833  | 0.171580818 |
| Map3k11 26403     | -1.156208424 | 0.083597074 | -1.156208424 | 0.083597074 |
| Ufsp2 192169      | -1.156233248 | 0.067786057 | -1.178494911 | 0.018104208 |
| Mthfs 107885      | -1.156342983 | 0.192805055 | -1.251202479 | 0.103919817 |
| Ppme1 72590       | -1.156358863 | 0.111054587 | -1.252005988 | 0.024596266 |
| Golga5 27277      | -1.156465213 | 0.269862157 | -1.268343374 | 0.148813051 |
| Gtf2a1 83602      | -1.15654792  | 0.27610466  | -1.067163075 | 0.370345492 |
| Gba2 230101       | -1.156559519 | 0.197281888 | -1.253147284 | 0.077002329 |
| Dixdc1 330938     | -1.156578675 | 0.287845695 | -1.557913559 | 0.012907056 |
| Rnf19a 30945      | -1.156611936 | 0.255513101 | -1.207515346 | 0.157861709 |
| Hsd17b12 56348    | -1.156639466 | 0.162416715 | -1.156639466 | 0.162416715 |
| Tatdn2 381801     | -1.156758951 | 0.187101013 | -1.059335379 | 0.352702144 |
| Ehd4 98878        | -1.156807048 | 0.255146063 | -1.225680359 | 0.12721337  |
| Mon1a 72825       | -1.156811833 | 0.15657399  | -1.288012155 | 0.028151199 |
| Recql4 79456      | -1.156964545 | 0.346144377 | -1.698733919 | 0.038804519 |
| Cyb5 109672       | -1.156989268 | 0.16738572  | -1.035927257 | 0.372212381 |

|                      |              |             |              |             |
|----------------------|--------------|-------------|--------------|-------------|
| Ccdc30 73332         | -1.156989838 | 0.300916966 | -1.584407703 | 0.030780199 |
| Adra1b 11548         | -1.157013838 | 0.289378137 | -1.466330898 | 0.044241442 |
| Ugt3a1 105887        | -1.157018483 | 0.073817829 | -1.157018483 | 0.073817829 |
| Mbl1 17194           | -1.157055027 | 0.151285215 | -1.15197541  | 0.122913968 |
| Nr2c2ap 75692        | -1.157081787 | 0.244275859 | -1.447670135 | 0.02156677  |
| Arsk 77041           | -1.157125944 | 0.350859413 | 1.168807535  | 0.314147864 |
| Rdh11 17252          | -1.157152732 | 0.225176611 | 1.06822327   | 0.311702208 |
| D930016D06Rik 100662 | -1.157211457 | 0.293068189 | -1.258227714 | 0.175325502 |
| Ezh2 14056           | -1.157261371 | 0.400302532 | -2.302802941 | 0.060851966 |
| Ppp1r2 66849         | -1.157282198 | 0.212763651 | -1.435589697 | 0.007820195 |
| Lrrc28 67867         | -1.157296115 | 0.088234102 | -1.118382707 | 0.158113301 |
| Ifih1 71586          | -1.157386631 | 0.259834085 | -1.024217375 | 0.456434623 |
| Pramef8 242736       | -1.157402776 | 0.351723087 | -1.585391943 | 0.11310171  |
| Tbxas1 21391         | -1.157537265 | 0.30540383  | 1.030736631  | 0.455410479 |
| Vps16 80743          | -1.157540181 | 0.200993209 | -1.053779754 | 0.365518623 |
| Ccnl2 56036          | -1.157548651 | 0.160224533 | -1.000534329 | 0.498183129 |
| Ralgps2 78255        | -1.157613995 | 0.232037961 | -1.447185555 | 0.017676718 |
| Hdac6 15185          | -1.157671871 | 0.125034306 | -1.077559282 | 0.246692424 |
| Micu1 216001         | -1.157709755 | 0.083132114 | -1.243069799 | 0.015559906 |
| Ankib1 70797         | -1.157753449 | 0.310957041 | -1.157753449 | 0.310957041 |
| Sirt7 209011         | -1.157774575 | 0.100223452 | -1.104215431 | 0.189495135 |
| Pla2g12b 69836       | -1.157863253 | 0.141324812 | -1.256454794 | 0.02107216  |
| Frm8 67457           | -1.157879241 | 0.115674126 | -1.172380704 | 0.04704641  |
| Ddo 70503            | -1.15789615  | 0.151848991 | -1.060755591 | 0.312326823 |
| Abcf2 27407          | -1.158211406 | 0.076874893 | -1.205936448 | 0.03511356  |
| Gpr182 11536         | -1.158267202 | 0.087877834 | -1.172615127 | 0.018300789 |
| Nmnat1 66454         | -1.15830615  | 0.164861088 | -1.272517585 | 0.021000442 |
| Pskh1 244631         | -1.158398739 | 0.156049159 | 1.006397025  | 0.475944697 |
| Cnot2 72068          | -1.158438298 | 0.233633774 | -1.031649304 | 0.43383436  |
| Vwa5a 67776          | -1.158453501 | 0.361307058 | 1.183911062  | 0.325193585 |
| Polr3c 74414         | -1.158472271 | 0.109705271 | -1.067941959 | 0.231580983 |
| Mup19 100189605      | -1.15849334  | 0.392159015 | 1.259537922  | 0.337430724 |
| Ttyh2 117160         | -1.158544542 | 0.120739621 | -1.201446214 | 0.017743354 |
| Mccc2 78038          | -1.158607503 | 0.063035678 | -1.104864404 | 0.127021835 |
| Wnk2 75607           | -1.158645939 | 0.36898372  | -1.158645939 | 0.36898372  |
| Bzw1 66882           | -1.158658786 | 0.304377692 | -1.158658786 | 0.304377692 |
| D2Wsu81e 227695      | -1.158668232 | 0.143533506 | -1.007103423 | 0.472614229 |
| D9Ertd402e 382117    | -1.158734238 | 0.196479075 | -1.329595433 | 0.031804499 |
| Tmx2 66958           | -1.158777736 | 0.14878023  | -1.086480266 | 0.265806647 |
| Was 22376            | -1.158783296 | 0.335955025 | -1.510121087 | 0.118813162 |
| Sirt2 64383          | -1.158850323 | 0.016306624 | -1.182099038 | 0.013293461 |
| Txndc9 98258         | -1.159251369 | 0.076439728 | -1.196355515 | 0.004958134 |
| Cc2d1a 212139        | -1.159259527 | 0.13691959  | -1.063497971 | 0.287528397 |
| Dmd 13405            | -1.159416099 | 0.339478435 | 1.140283798  | 0.330318536 |
| Naif1 71254          | -1.159426837 | 0.381121265 | -1.182022492 | 0.376173231 |
| Gorasp2 70231        | -1.159497581 | 0.124440573 | -1.1391568   | 0.058204293 |
| D2hgdh 98314         | -1.159563724 | 0.24149401  | -1.021200854 | 0.456272653 |
| Gbp4 17472           | -1.159578942 | 0.362360465 | 1.16622302   | 0.348505043 |
| Stat6 20852          | -1.159672194 | 0.171318441 | -1.159672194 | 0.171318441 |
| Pter 19212           | -1.159736104 | 0.185967672 | -1.153312723 | 0.141254124 |
| Rpn2 20014           | -1.15984994  | 0.068676771 | -1.050871426 | 0.258095903 |
| Gtpbp3 70359         | -1.159896869 | 0.098178656 | -1.090795731 | 0.194715911 |
| Fbxl17 50758         | -1.160225849 | 0.262136342 | 1.031815718  | 0.428249405 |

|                      |              |             |              |             |
|----------------------|--------------|-------------|--------------|-------------|
| Rapgef1 107746       | -1.160241892 | 0.109848292 | -1.11497409  | 0.064260714 |
| Cd81 12520           | -1.160261032 | 0.03189257  | -1.22390988  | 0.004007345 |
| Dhrs11 192970        | -1.160305418 | 0.241205297 | -1.008966668 | 0.477475069 |
| Tram1 72265          | -1.160311231 | 0.080761176 | -1.239565507 | 0.020022416 |
| Ttc36 192653         | -1.160363473 | 0.229034143 | -1.471221704 | 0.004601434 |
| Nono 53610           | -1.160400635 | 0.157699761 | -1.25848824  | 0.037113827 |
| 9330151L19Rik 414085 | -1.160498307 | 0.281247236 | -1.018694852 | 0.47116695  |
| Tcf4 21413           | -1.160530002 | 0.329715414 | 1.084788043  | 0.329718338 |
| Cadps2 320405        | -1.160556225 | 0.121089798 | -1.327238502 | 0.008319559 |
| Slc15a3 65221        | -1.160582435 | 0.205274671 | -1.296251354 | 0.07795741  |
| Mcat 223722          | -1.160605552 | 0.119726173 | -1.225148537 | 0.029415073 |
| Zxda 668171          | -1.160692669 | 0.38880657  | -1.916416447 | 0.048242189 |
| Cyp2a4 13086         | -1.160694948 | 0.233972999 | -1.160694948 | 0.233972999 |
| Ktn1 16709           | -1.160804131 | 0.311708055 | 1.036146052  | 0.45115082  |
| Aldh1l1 107747       | -1.160856343 | 0.003251731 | -1.151226352 | 0.000875218 |
| Oaz2-ps 18247        | -1.160901373 | 0.069741471 | -1.09759132  | 0.142620115 |
| Pqlc1 66943          | -1.160937861 | 0.058265169 | -1.041511571 | 0.179125373 |
| Slc23a2 54338        | -1.161055632 | 0.301744175 | -1.288792141 | 0.213971809 |
| AW554918 225289      | -1.161060909 | 0.369812995 | -1.694687877 | 0.125366495 |
| Crtc2 74343          | -1.161066461 | 0.064560267 | -1.291012507 | 0.000155399 |
| Bcl2l13 94044        | -1.161195249 | 0.224312902 | -1.126166568 | 0.198876432 |
| Ttc7 225049          | -1.161276548 | 0.061845723 | -1.05760204  | 0.230979596 |
| D4Wsu53e 27981       | -1.16136155  | 0.30042237  | -1.400085309 | 0.125990384 |
| Upp2 76654           | -1.161395111 | 0.248614574 | -1.002242882 | 0.495223403 |
| Naa25 231713         | -1.161404552 | 0.179538897 | -1.208588867 | 0.087968827 |
| Apoa1bp 246703       | -1.161411324 | 0.07097116  | -1.161411324 | 0.07097116  |
| Ptprcap 19265        | -1.161597443 | 0.24379325  | -1.052195803 | 0.407390071 |
| Dse 212898           | -1.161715791 | 0.304584978 | 1.023259174  | 0.467436168 |
| Bicd2 76895          | -1.161719416 | 0.254078428 | -1.095856696 | 0.301337145 |
| Sfrp1 20377          | -1.161797137 | 0.379382084 | -1.656314914 | 0.17186137  |
| Mlec 109154          | -1.161846894 | 0.085740115 | -1.268335751 | 0.005986173 |
| Zfp248 72720         | -1.16189407  | 0.403007224 | 1.927201325  | 0.068141101 |
| Tpx2 72119           | -1.161971376 | 0.426260985 | -2.696597471 | 0.113604984 |
| Ugp2 216558          | -1.162157651 | 0.102510097 | -1.090184164 | 0.207661134 |
| Dido1 23856          | -1.162286607 | 0.267497673 | -1.022082771 | 0.454955471 |
| Tmbim6 110213        | -1.162306316 | 0.010533181 | -1.149171286 | 0.002020212 |
| Mina 67014           | -1.162310347 | 0.130042557 | -1.078552221 | 0.261822572 |
| Dlc1 50768           | -1.162329074 | 0.257605334 | -1.308574957 | 0.137284062 |
| Rnf128 66889         | -1.162339504 | 0.19490296  | -1.162339504 | 0.19490296  |
| Itih3 16426          | -1.162342647 | 0.122322542 | -1.222567946 | 0.059301293 |
| Fam49a 76820         | -1.162382313 | 0.35868956  | -1.480926399 | 0.195746513 |
| 4931414P19Rik 74359  | -1.16249708  | 0.233169659 | -1.295542597 | 0.073379645 |
| Anapc7 56317         | -1.162517132 | 0.201106258 | -1.140685092 | 0.197100677 |
| Mycbp2 105689        | -1.162745186 | 0.229985029 | -1.071170905 | 0.363336552 |
| F8 14069             | -1.162765341 | 0.354017002 | -1.877681147 | 0.0400995   |
| Zdhhc3 69035         | -1.162827927 | 0.09165224  | -1.308523541 | 0.002889854 |
| Fam179b 328108       | -1.162840048 | 0.378309808 | -1.605288519 | 0.190484197 |
| 6330578E17Rik 76178  | -1.162964266 | 0.235039168 | -1.132541323 | 0.211469056 |
| Aatf 56321           | -1.162976318 | 0.116040769 | -1.162976318 | 0.116040769 |
| HnrpII 72692         | -1.162985074 | 0.326638488 | -1.219833859 | 0.253503801 |
| Niacr1 80885         | -1.162990048 | 0.43126574  | 1.150701957  | 0.450338304 |
| Tmem47 192216        | -1.163077087 | 0.393515424 | 1.166381036  | 0.357980049 |
| Zfp281 226442        | -1.163077567 | 0.301012529 | -1.384093357 | 0.142942317 |

|                      |              |             |              |             |
|----------------------|--------------|-------------|--------------|-------------|
| 5730494N06Rik 70612  | -1.163133068 | 0.206090222 | -1.163133068 | 0.206090222 |
| Prpf3 70767          | -1.163253831 | 0.047317297 | -1.214283838 | 0.012522068 |
| Flt4 14257           | -1.163291369 | 0.127950497 | -1.241002337 | 0.0405646   |
| Scyl3 240880         | -1.163306622 | 0.175407806 | 1.027388328  | 0.403867172 |
| 1500015A07Rik 68982  | -1.163393931 | 0.345101419 | 1.29439236   | 0.20184601  |
| Scn7a 20272          | -1.163532469 | 0.4240673   | -2.078368687 | 0.229588298 |
| Hsbp1 68196          | -1.163577461 | 0.104064793 | -1.327161669 | 0.001733929 |
| Cyp2r1 244209        | -1.163606704 | 0.317476226 | 1.263699355  | 0.122378987 |
| AA960436 101985      | -1.163607021 | 0.236279601 | -1.27674326  | 0.142232535 |
| Nup35 69482          | -1.163646588 | 0.409306379 | -1.400433478 | 0.284360007 |
| Cuedc1 103841        | -1.163652535 | 0.303451708 | 1.078223102  | 0.373852026 |
| 4930555I21Rik 78806  | -1.163689676 | 0.433899348 | -1.001617989 | 0.49931754  |
| Wdr81 192652         | -1.164025109 | 0.088893263 | -1.082994503 | 0.183319295 |
| Eif3c 56347          | -1.16419198  | 0.02064898  | -1.189841851 | 0.00049419  |
| Atp9b 50771          | -1.16427026  | 0.041856658 | -1.275607439 | 0.000820145 |
| Hapln4 330790        | -1.164335293 | 0.271423629 | -1.455127611 | 0.040525389 |
| 2010204K13Rik 68355  | -1.16437436  | 0.424292817 | 2.377509955  | 0.104925156 |
| Serpina1d 20703      | -1.164443809 | 0.120779177 | -1.279256285 | 0.001903829 |
| Srrt 83701           | -1.164467418 | 0.075959248 | -1.098529017 | 0.153936705 |
| Rcsd1 226594         | -1.164505202 | 0.244754738 | 1.000870442  | 0.498078024 |
| Slc44a1 100434       | -1.164624878 | 0.060855587 | -1.221263979 | 0.026358556 |
| Gas7 14457           | -1.164784348 | 0.32869941  | 1.058179827  | 0.432856825 |
| 3000002C10Rik 378954 | -1.16482281  | 0.356482978 | -1.610825836 | 0.132478067 |
| Mcm7 17220           | -1.164939049 | 0.206189935 | -1.051670027 | 0.385684752 |
| Polr3b 70428         | -1.164954115 | 0.138441752 | -1.233419629 | 0.064108554 |
| Nrd1 230598          | -1.165102338 | 0.021034941 | -1.257986281 | 9.38512E-05 |
| Sptlc1 268656        | -1.165187187 | 0.099529347 | -1.079292693 | 0.141990974 |
| 1700001C19Rik 75462  | -1.165198176 | 0.270132294 | -1.165198176 | 0.270132294 |
| Thns12 232078        | -1.165281292 | 0.050669373 | -1.1906408   | 0.045356313 |
| Zfp191 59057         | -1.16528713  | 0.090473411 | -1.237576519 | 0.019783551 |
| Ptgr2 77219          | -1.165402641 | 0.100623945 | -1.054074339 | 0.163344816 |
| Eif2ak3 13666        | -1.16547893  | 0.276724862 | -1.299292488 | 0.177869062 |
| Pcbp4 59092          | -1.165629154 | 0.216910678 | -1.392943529 | 0.01810093  |
| Tmem158 72309        | -1.165850394 | 0.437453649 | -3.221509091 | 0.127882662 |
| Gimap5 317757        | -1.165927181 | 0.366771773 | -1.165927181 | 0.366771773 |
| Ager 11596           | -1.166031552 | 0.389396952 | -1.987541548 | 0.074579046 |
| 2310028H24Rik 71901  | -1.166042318 | 0.263192671 | -1.166042318 | 0.263192671 |
| Sorbs3 20410         | -1.166043563 | 0.079517026 | -1.106004064 | 0.160015961 |
| Chd7 320790          | -1.16606934  | 0.194430256 | 1.037178359  | 0.358684339 |
| Nsg1 18196           | -1.166103972 | 0.264914733 | -1.549526155 | 0.014219149 |
| Sidt2 214597         | -1.166192053 | 0.051024652 | -1.166192053 | 0.051024652 |
| Nudcd3 209586        | -1.166223566 | 0.194133313 | -1.166223566 | 0.194133313 |
| Coro2b 235431        | -1.166287483 | 0.238822748 | -1.200614923 | 0.134969585 |
| I7Rn6 67669          | -1.166333747 | 0.192102752 | -1.273952347 | 0.063891853 |
| Bcl2l12 75736        | -1.166346897 | 0.247294968 | -1.151886073 | 0.193485153 |
| Zkscan5 22757        | -1.16640908  | 0.123330647 | -1.266609621 | 0.036777142 |
| Vps33a 77573         | -1.166483875 | 0.167795374 | -1.287234358 | 0.034325592 |
| Chaf1a 27221         | -1.166513146 | 0.29782108  | -1.38522985  | 0.143729739 |
| Gbf1 107338          | -1.166518887 | 0.046235127 | -1.166518887 | 0.046235127 |
| Iqcd 75732           | -1.166604495 | 0.346384504 | 1.021275564  | 0.475960388 |
| Ociad2 433904        | -1.166638354 | 0.287686146 | -1.317136451 | 0.116056975 |
| Ache 11423           | -1.166669055 | 0.411319661 | -3.485201345 | 0.01373478  |
| Slc25a24 229731      | -1.166754581 | 0.421383765 | -4.416830303 | 0.002861384 |

|                      |              |             |              |             |
|----------------------|--------------|-------------|--------------|-------------|
| BC026585 226527      | -1.166870128 | 0.124816903 | -1.28406249  | 0.023514116 |
| Scamp3 24045         | -1.167008614 | 0.044635156 | -1.15280702  | 0.016478064 |
| Dctn1 13191          | -1.167011729 | 0.03803293  | -1.055648005 | 0.106683486 |
| Akr1c13 27384        | -1.16702596  | 0.01404547  | -1.168724465 | 0.003144258 |
| D10Jhu81e 28295      | -1.167037959 | 0.068978593 | -1.112477338 | 0.138865545 |
| Scarf2 224024        | -1.167089436 | 0.345846382 | 1.113564778  | 0.385821642 |
| Coasy 71743          | -1.167115687 | 0.031311712 | -1.109476296 | 0.053080291 |
| Igsf11 207683        | -1.167270477 | 0.205240513 | -1.167270477 | 0.205240513 |
| Pvt1 19296           | -1.167325582 | 0.398715476 | -1.167325582 | 0.398715476 |
| 1190007F08Rik 68859  | -1.167395111 | 0.342782459 | -1.467850276 | 0.177681063 |
| Zfp828 101994        | -1.167550272 | 0.296975974 | -1.167550272 | 0.296975974 |
| Ube2k 53323          | -1.167734595 | 0.185904913 | -1.28862     | 0.078114596 |
| Tti2 234138          | -1.16774554  | 0.062554027 | -1.054849615 | 0.226125368 |
| Lclat1 225010        | -1.167775758 | 0.211077958 | -1.167775758 | 0.211077958 |
| 1110008L16Rik 66132  | -1.167831193 | 0.163214588 | -1.184671434 | 0.093110371 |
| Clasp1 76707         | -1.167882296 | 0.219355902 | 1.066039665  | 0.324499276 |
| Al837181 107242      | -1.167909966 | 0.072237632 | -1.20801744  | 0.052205356 |
| 5031425F14Rik 319684 | -1.167976153 | 0.412508893 | -1.305244483 | 0.378399987 |
| Wdr18 216156         | -1.168024388 | 0.031285479 | -1.104645253 | 0.043069157 |
| Zkscan6 52712        | -1.16826177  | 0.307054315 | -1.00276196  | 0.496509938 |
| Fbxo4 106052         | -1.168287243 | 0.22949561  | -1.481405388 | 0.016725757 |
| Zfp263 74120         | -1.168326806 | 0.185614783 | -1.157919394 | 0.158176535 |
| Vmac 106639          | -1.168327377 | 0.108219807 | -1.316302602 | 0.007327138 |
| Atf6 226641          | -1.168339108 | 0.169941946 | -1.168339108 | 0.169941946 |
| Slc6a9 14664         | -1.168341661 | 0.155204525 | -1.168341661 | 0.155204525 |
| Ncoa1 17977          | -1.168342496 | 0.243648959 | 1.030114084  | 0.418127229 |
| Myo9b 17925          | -1.168391532 | 0.158037899 | 1.002074076  | 0.493220685 |
| Egln1 112405         | -1.168410661 | 0.07627851  | -1.321867868 | 0.001311579 |
| Sgce 20392           | -1.168463272 | 0.26080608  | -1.302019769 | 0.118505185 |
| Irgb5 16419          | -1.168587654 | 0.116960488 | -1.25253339  | 0.027127803 |
| Sh2b1 20399          | -1.168617689 | 0.090374754 | -1.317644329 | 0.00619576  |
| Psmb9 16912          | -1.168624918 | 0.254099623 | -1.203077549 | 0.15633352  |
| Bcat2 12036          | -1.168638084 | 0.155574135 | -1.168638084 | 0.155574135 |
| Golga1 76899         | -1.168642236 | 0.222757548 | -1.099547742 | 0.332211542 |
| Urgcp 72046          | -1.168843689 | 0.077797471 | -1.09320895  | 0.159086675 |
| Aqp11 66333          | -1.16884723  | 0.082853284 | -1.08899096  | 0.169827149 |
| Slc46a1 52466        | -1.169136433 | 0.039484869 | -1.176398682 | 0.017318945 |
| Mga 29808            | -1.169142914 | 0.313471258 | -1.146146121 | 0.222887578 |
| Luc7l2 192196        | -1.169198725 | 0.248259412 | 1.042793289  | 0.415780973 |
| Gigyf1 57330         | -1.169228166 | 0.14735798  | -1.269060417 | 0.060897662 |
| Ak3 56248            | -1.169277363 | 0.007442411 | -1.127192229 | 0.008521427 |
| Mtmr7 54384          | -1.169284889 | 0.352533128 | -1.617758411 | 0.12916833  |
| Cdadcl 71891         | -1.16931938  | 0.151819615 | -1.002889247 | 0.489868472 |
| Pisd-ps2 328734      | -1.169320009 | 0.348760645 | -1.025477069 | 0.474216428 |
| Tmem115 56395        | -1.169405943 | 0.132021595 | -1.23897211  | 0.077863519 |
| Usp47 74996          | -1.169500505 | 0.109027514 | -1.098510952 | 0.208658026 |
| Cachd1 320508        | -1.169502914 | 0.370386032 | -1.479100514 | 0.233992227 |
| Sh3bgrl 56726        | -1.169559585 | 0.312016522 | -1.120856773 | 0.325983009 |
| Baz2a 116848         | -1.16973348  | 0.298104717 | 1.177768206  | 0.218173178 |
| Rtn4 68585           | -1.169862533 | 0.186962182 | -1.17126968  | 0.171197628 |
| Ubxn8 108159         | -1.169917229 | 0.080586555 | -1.311852852 | 0.005511502 |
| Cdt1 67177           | -1.17000961  | 0.295700876 | -1.428454933 | 0.115851023 |
| Mpp5 56217           | -1.170030102 | 0.266386615 | -1.371958361 | 0.110483959 |

|                     |              |             |              |             |
|---------------------|--------------|-------------|--------------|-------------|
| Hnf1a 21405         | -1.17005446  | 0.119110177 | -1.127196288 | 0.113807802 |
| Cyp7a1 13122        | -1.170107851 | 0.341398706 | -1.170107851 | 0.341398706 |
| Pcnx 54604          | -1.170116141 | 0.035954871 | -1.162496446 | 0.022024818 |
| Fitm2 228859        | -1.170135995 | 0.215009597 | -1.459761244 | 0.012844802 |
| Tcn2 21452          | -1.170205629 | 0.116099348 | -1.170205629 | 0.116099348 |
| Ythdf3 229096       | -1.170228179 | 0.321534753 | -1.050311188 | 0.438433218 |
| 1110018G07Rik 68497 | -1.170271183 | 0.207094203 | -1.05814238  | 0.378915669 |
| Uba2 50995          | -1.170295031 | 0.264768021 | -1.003906862 | 0.493201708 |
| Tceb1 67923         | -1.170306324 | 0.089790381 | -1.038640198 | 0.331125822 |
| Macrod2 72899       | -1.170309256 | 0.220126326 | -1.339348377 | 0.074776199 |
| Mterf 545725        | -1.170339789 | 0.274824718 | -1.167297565 | 0.144855092 |
| Arfgef2 99371       | -1.170432491 | 0.203425032 | -1.034509379 | 0.415669253 |
| Dlg1 13383          | -1.170436258 | 0.300284777 | 1.057107214  | 0.415098059 |
| Ergic3 66366        | -1.170449583 | 0.144172451 | -1.376469102 | 0.006716292 |
| Cops3 26572         | -1.170521361 | 0.245379177 | -1.11772579  | 0.275214489 |
| Carhsp1 52502       | -1.170561463 | 0.00401634  | -1.108739668 | 0.002542993 |
| Gtf2f1 98053        | -1.170620555 | 0.206114089 | -1.170620555 | 0.206114089 |
| Ss18l1 269397       | -1.170725749 | 0.318554809 | -1.164278078 | 0.284018604 |
| Fam203a 59053       | -1.170797922 | 0.253193914 | -1.170797922 | 0.253193914 |
| Hspb7 29818         | -1.170826329 | 0.412908888 | -1.557757649 | 0.233183213 |
| Chi3l1 12654        | -1.170859674 | 0.447086006 | 1            | #DIV/0!     |
| Crnkl1 66877        | -1.170860848 | 0.228990242 | 1.073476644  | 0.325705142 |
| Brdt 114642         | -1.170927559 | 0.326764795 | 1.019716241  | 0.474250015 |
| Cbr1 12408          | -1.171090277 | 0.089811548 | -1.265908619 | 0.004073898 |
| Pisd 320951         | -1.171118004 | 0.069922403 | -1.104774968 | 0.142029884 |
| Prdm2 110593        | -1.171149991 | 0.2618847   | -1.20067761  | 0.125850378 |
| Slc23a1 20522       | -1.171279349 | 0.070755566 | -1.171279349 | 0.070755566 |
| Slc12a6 107723      | -1.171427338 | 0.274965471 | 1.028915149  | 0.448853908 |
| Sfmbt1 54650        | -1.171466598 | 0.233992891 | -1.068743584 | 0.335042911 |
| Pebp1 23980         | -1.171485896 | 0.07578682  | -1.194676007 | 0.01847383  |
| Tacc3 21335         | -1.171494561 | 0.325693484 | -1.767951503 | 0.019223771 |
| Slc43a1 72401       | -1.171637961 | 0.23829579  | -1.34180119  | 0.040899079 |
| Rnf25 57751         | -1.171642771 | 0.181760389 | -1.088145734 | 0.305730299 |
| Pdgfrb 18596        | -1.171671225 | 0.22283704  | -1.332668995 | 0.053000034 |
| Lrrc40 67144        | -1.171705633 | 0.214778945 | -1.171705633 | 0.214778945 |
| AW011738 100382     | -1.171719695 | 0.331538769 | -1.555243365 | 0.113962539 |
| Fahd2a 68126        | -1.171759379 | 0.178652482 | -1.306167646 | 0.020837265 |
| Zfyve27 319740      | -1.171762473 | 0.108369075 | -1.159023208 | 0.092275709 |
| Acat1 110446        | -1.171766583 | 0.096516733 | -1.096483231 | 0.192500763 |
| Fiz1 23877          | -1.171807545 | 0.072088865 | -1.133118632 | 0.132492158 |
| Sp140 434484        | -1.1718336   | 0.2654422   | -1.563342944 | 0.020920812 |
| Sf1 22668           | -1.171847737 | 0.072922663 | -1.219681826 | 0.046552095 |
| Tmc4 353499         | -1.171868327 | 0.364100721 | -1.823724121 | 0.004280278 |
| Nupl2 231042        | -1.171971381 | 0.322833465 | -1.171971381 | 0.322833465 |
| Atp5sl 66349        | -1.172205403 | 0.116060138 | -1.172205403 | 0.116060138 |
| Rabgap1 227800      | -1.172733933 | 0.23033913  | -1.232882068 | 0.152180237 |
| 2210016F16Rik 70153 | -1.172761834 | 0.096698667 | -1.181306734 | 0.044922405 |
| Sh3glb1 54673       | -1.17276987  | 0.027082571 | -1.17276987  | 0.027082571 |
| S1pr3 13610         | -1.172852542 | 0.286766694 | -1.340942707 | 0.103015291 |
| Arhgap12 75415      | -1.172920958 | 0.317359914 | -1.456333878 | 0.144009401 |
| Fam89a 69627        | -1.173015199 | 0.274665735 | -1.122987922 | 0.26939769  |
| Cnot3 232791        | -1.173046619 | 0.098041167 | -1.098493277 | 0.193979014 |
| Zscan22 232878      | -1.173120796 | 0.250141276 | -1.164467238 | 0.171919339 |

|                      |              |             |              |             |
|----------------------|--------------|-------------|--------------|-------------|
| 2810006K23Rik 72650  | -1.173125173 | 0.123998746 | -1.257599525 | 0.056900495 |
| Ppa1 67895           | -1.173218747 | 0.052157318 | -1.179692967 | 0.010263433 |
| CsdA 56449           | -1.173223336 | 0.011259808 | -1.20245424  | 0.00542881  |
| Sipa1 20469          | -1.173478659 | 0.130980008 | -1.308761094 | 0.018949788 |
| Adamts2 216725       | -1.173496649 | 0.18246115  | -1.29519801  | 0.078616795 |
| Smap2 69780          | -1.17349701  | 0.012829548 | -1.226843666 | 0.001739371 |
| C8a 230558           | -1.173528578 | 0.133427425 | -1.173528578 | 0.133427425 |
| Stx6 58244           | -1.173529525 | 0.198665063 | -1.051530104 | 0.384306682 |
| Abcb11 27413         | -1.173651097 | 0.176415752 | -1.044341252 | 0.375547475 |
| Rdh13 108841         | -1.173716427 | 0.203661763 | -1.173716427 | 0.203661763 |
| Slc16a7 20503        | -1.173725205 | 0.100722899 | -1.298904992 | 0.008094888 |
| D11Wsu47e 276852     | -1.173742072 | 0.244583002 | -1.200696063 | 0.181623043 |
| Nae1 234664          | -1.173766593 | 0.287085081 | -1.221991535 | 0.21150668  |
| Oxr1 170719          | -1.173800535 | 0.332529443 | -1.000771042 | 0.49876224  |
| Irf9 16391           | -1.173858694 | 0.102436767 | -1.040871329 | 0.34179513  |
| Farsb 23874          | -1.173902326 | 0.125288477 | -1.015430327 | 0.441118397 |
| Rae1 66679           | -1.174010065 | 0.189080581 | -1.174010065 | 0.189080581 |
| Aff1 17355           | -1.174119547 | 0.216695327 | -1.16054074  | 0.128740839 |
| Acot7 70025          | -1.17416414  | 0.065223936 | -1.247071581 | 0.008517644 |
| 6820431F20Rik 547150 | -1.174185497 | 0.201007609 | -1.139082434 | 0.175942294 |
| Pafah2 100163        | -1.174196812 | 0.070331096 | -1.086503175 | 0.138446317 |
| Pde7a 18583          | -1.174224164 | 0.248784329 | 1.08308308   | 0.339599417 |
| Scfd2 212986         | -1.174536293 | 0.017321995 | -1.131079068 | 0.035615931 |
| Mfap3l 71306         | -1.17462162  | 0.419551604 | -2.098176768 | 0.227724758 |
| Tns3 319939          | -1.174666126 | 0.349894802 | -1.058728218 | 0.421808428 |
| Clcn4-2 12727        | -1.174674991 | 0.155340111 | -1.292219236 | 0.025647314 |
| Bach2 12014          | -1.174701647 | 0.317977753 | -1.174701647 | 0.317977753 |
| Acox1 11430          | -1.174733058 | 0.139426796 | -1.261762407 | 0.045747032 |
| Acss2 60525          | -1.174765519 | 0.155069669 | -1.174765519 | 0.155069669 |
| Rab5c 19345          | -1.174800231 | 0.010753241 | -1.154090855 | 0.00251564  |
| Ppip5k1 327655       | -1.174830593 | 0.212839947 | -1.338927894 | 0.075265534 |
| Tnfaip2 21928        | -1.174865894 | 0.23866013  | -1.067376091 | 0.26168176  |
| C77080 97130         | -1.174867075 | 0.012380055 | -1.100484986 | 0.040570375 |
| Ebf4 228598          | -1.174981695 | 0.413929317 | -1.074966612 | 0.46340475  |
| Pno1 66249           | -1.174992472 | 0.263330197 | -1.174992472 | 0.263330197 |
| Ubn2 320538          | -1.175012266 | 0.230789062 | 1.011132388  | 0.470939363 |
| Mcoln1 94178         | -1.175123716 | 0.107997931 | -1.238126236 | 0.048965966 |
| Thoc6 386612         | -1.175127984 | 0.235825687 | -1.057138914 | 0.393208744 |
| Lrig1 16206          | -1.1751601   | 0.274283017 | -1.1751601   | 0.274283017 |
| Nfkbib 18036         | -1.175160407 | 0.069729727 | -1.253795573 | 0.007058771 |
| Uchl5 56207          | -1.175199337 | 0.263939174 | -1.175199337 | 0.263939174 |
| Lonp1 74142          | -1.175432349 | 0.026483126 | -1.142179281 | 0.05462071  |
| Zfp142 77264         | -1.175537676 | 0.238750895 | -1.203492939 | 0.159702888 |
| Cdc23 52563          | -1.175558332 | 0.196404601 | -1.175558332 | 0.196404601 |
| Fam46a 212943        | -1.175575143 | 0.213420557 | -1.266072535 | 0.145896881 |
| Otud5 54644          | -1.175648491 | 0.070849222 | -1.175648491 | 0.070849222 |
| Al507597 100165      | -1.175653875 | 0.164204263 | -1.07925492  | 0.311915211 |
| Arhgap29 214137      | -1.175777759 | 0.278224996 | -1.175777759 | 0.278224996 |
| Akap1 11640          | -1.175805538 | 0.139600558 | -1.175805538 | 0.139600558 |
| Hnrnp2 56258         | -1.17595665  | 0.264961868 | 1.032023199  | 0.437717069 |
| Fam185a 330050       | -1.176353554 | 0.298022942 | -1.176353554 | 0.298022942 |
| Fkbp8 14232          | -1.176431776 | 0.198894123 | -1.363417682 | 0.041256542 |
| Plekhhf2 71801       | -1.176461613 | 0.179787177 | -1.235058073 | 0.126604854 |



|                     |              |             |              |             |
|---------------------|--------------|-------------|--------------|-------------|
| C2cd2 207781        | -1.176462276 | 0.009087929 | -1.097233068 | 0.011381347 |
| Kmo 98256           | -1.1765459   | 0.143945153 | -1.1765459   | 0.143945153 |
| Rnf24 51902         | -1.176547198 | 0.272908313 | -1.390846888 | 0.119014938 |
| Fxyd6 59095         | -1.176572857 | 0.343030679 | -1.019944789 | 0.477744197 |
| Hdac8 70315         | -1.17661704  | 0.312578709 | 1.013006072  | 0.484716818 |
| Zfp770 228491       | -1.176677814 | 0.344278735 | -2.045230263 | 0.006441542 |
| Osmr 18414          | -1.176727845 | 0.385497767 | -1.727213243 | 0.195612428 |
| Nagpa 27426         | -1.17681135  | 0.183279377 | -1.154969902 | 0.173037991 |
| Pkn1 320795         | -1.176844317 | 0.136139761 | -1.380645493 | 0.008278303 |
| Aarsd1 69684        | -1.176922015 | 0.138124309 | -1.263974619 | 0.045932059 |
| Gphn 268566         | -1.176945692 | 0.195252233 | -1.287657393 | 0.072564857 |
| Mynn 80732          | -1.177092268 | 0.266346571 | -1.022216721 | 0.465560038 |
| Tnrc6a 233833       | -1.177122587 | 0.295761735 | 1.096612041  | 0.332633702 |
| Capn7 12339         | -1.17717913  | 0.292187259 | -1.597660291 | 0.037279394 |
| Lhfp12 218454       | -1.177226004 | 0.318102943 | -1.177226004 | 0.318102943 |
| Rcan1 54720         | -1.177290065 | 0.146178325 | -1.217109694 | 0.040652616 |
| Ssh2 237860         | -1.17734785  | 0.393287128 | 1.440650232  | 0.261351483 |
| Dvl1 13542          | -1.177386702 | 0.064563318 | -1.256192523 | 0.017014596 |
| Nubp1 26425         | -1.17742964  | 0.123991015 | -1.17742964  | 0.123991015 |
| Zfp866 330788       | -1.177517946 | 0.323397346 | 1.273758954  | 0.18119326  |
| Mcm2 17216          | -1.177596194 | 0.356677619 | -1.128767193 | 0.394689542 |
| Kcnip3 56461        | -1.177667391 | 0.282251355 | -1.177667391 | 0.282251355 |
| Gpr108 78308        | -1.177729807 | 0.16397326  | -1.268585314 | 0.092668425 |
| Pde8a 18584         | -1.177731004 | 0.198017403 | -1.094660316 | 0.27963337  |
| Wrn 22427           | -1.177763417 | 0.083505322 | -1.114044359 | 0.166514402 |
| Aldh7a1 110695      | -1.177914252 | 0.016487169 | -1.160170969 | 0.032993158 |
| Tkt 21881           | -1.177945823 | 0.00243629  | -1.142717418 | 0.000272089 |
| Cir1 66935          | -1.178107369 | 0.034283579 | -1.260355089 | 0.002114212 |
| 1700025G04Rik 69399 | -1.17817687  | 0.270496251 | 1.152934766  | 0.214719489 |
| Hpgds 54486         | -1.178198199 | 0.4034044   | 1.153994792  | 0.427016401 |
| Zfp628 232816       | -1.178358665 | 0.154675161 | -1.178358665 | 0.154675161 |
| Twf2 23999          | -1.178360878 | 0.287410159 | -1.023257733 | 0.464928236 |
| Hmg20a 66867        | -1.17838582  | 0.19781789  | -1.17838582  | 0.19781789  |
| Edaradd 171211      | -1.178571429 | 0.434978868 | 1            | #DIV/0!     |
| Slco4a1 108115      | -1.178571429 | 0.434978868 | 1            | #DIV/0!     |
| Cldn10 58187        | -1.178571429 | 0.434978868 | 1            | #DIV/0!     |
| Cyp3a57 622127      | -1.178571429 | 0.434978868 | 1            | #DIV/0!     |
| Aspm 12316          | -1.178571429 | 0.434978868 | 1            | #DIV/0!     |
| Slc7a6 330836       | -1.178571429 | 0.434978868 | 1            | #DIV/0!     |
| Wdr63 242253        | -1.178571429 | 0.434978868 | 1            | #DIV/0!     |
| Tnfaip8l3 244882    | -1.178571429 | 0.434978868 | 1            | #DIV/0!     |
| Slc5a11 233836      | -1.178571429 | 0.434978868 | 1            | #DIV/0!     |
| Slc39a2 214922      | -1.178583941 | 0.380771592 | -1.178583941 | 0.380771592 |
| Zfp612 234725       | -1.178647985 | 0.201143614 | 1.052524773  | 0.352974604 |
| Pdcd6ip 18571       | -1.178717921 | 0.109579223 | -1.178717921 | 0.109579223 |
| Ksr1 16706          | -1.178766399 | 0.35869223  | -1.468185871 | 0.228617239 |
| Ano6 105722         | -1.17882012  | 0.280002513 | 1.046470024  | 0.4208153   |
| Akap8 56399         | -1.178886402 | 0.270989018 | 1.047961208  | 0.407948095 |
| Sh2d4a 72281        | -1.178932121 | 0.216760373 | -1.223095226 | 0.149902667 |
| Strada 72149        | -1.178964807 | 0.259803084 | -1.293762504 | 0.08401263  |
| U2af1l4 233073      | -1.179047411 | 0.14240331  | -1.313621261 | 0.032201795 |
| 4930444A02Rik 74653 | -1.179245017 | 0.249822611 | -1.31892715  | 0.148478237 |
| 4933404O12Rik 66752 | -1.179245536 | 0.26106994  | -1.12150734  | 0.255830794 |

|                      |              |             |              |             |
|----------------------|--------------|-------------|--------------|-------------|
| Wbp11 60321          | -1.179347758 | 0.07761563  | -1.077969532 | 0.146320344 |
| Tgfb1i1 21804        | -1.17938343  | 0.335244734 | -1.362913162 | 0.072886331 |
| Acot8 170789         | -1.179445404 | 0.152927248 | -1.062729884 | 0.321650334 |
| Csf1r 12978          | -1.179461311 | 0.143250532 | -1.179461311 | 0.143250532 |
| Eno3 13808           | -1.179461434 | 0.290281907 | -1.460506716 | 0.104388928 |
| Ccdc64 75665         | -1.179498328 | 0.416069701 | 1.280421331  | 0.368728465 |
| Cep290 216274        | -1.179600808 | 0.418903896 | -1.864887618 | 0.261052046 |
| Ndufs8 225887        | -1.179770809 | 0.16108728  | -1.141069508 | 0.175735954 |
| Masp2 17175          | -1.179798841 | 0.0023876   | -1.192798418 | 0.002759016 |
| BC037034 231807      | -1.179810282 | 0.082237223 | -1.099420641 | 0.169102017 |
| Itpril2 319622       | -1.179817231 | 0.322794249 | 1.020985875  | 0.477608915 |
| Hs6st1 50785         | -1.179842817 | 0.035897466 | -1.181262703 | 0.029214997 |
| Gtf2ird2 114674      | -1.179921323 | 0.278256226 | -1.653838854 | 0.015047724 |
| Ppp1cc 19047         | -1.179975238 | 0.140983645 | -1.253154313 | 0.050702688 |
| Amz2 13929           | -1.179994566 | 0.150857904 | -1.068364698 | 0.312073919 |
| Ift46 76568          | -1.180045617 | 0.209989582 | -1.180045617 | 0.209989582 |
| Tnfsf10 22035        | -1.180052493 | 0.348163853 | 1.043357547  | 0.462623034 |
| 1110004E09Rik 68001  | -1.180079468 | 0.206223991 | -1.092134183 | 0.327232462 |
| Rcor1 217864         | -1.180079664 | 0.444498788 | 2.023658599  | 0.304156948 |
| Wdfy4 545030         | -1.180294702 | 0.247940702 | -1.392719375 | 0.087539088 |
| Slc25a37 67712       | -1.180536214 | 0.106393485 | -1.032028223 | 0.365049566 |
| Abr 109934           | -1.180628271 | 0.343155099 | 1.28975408   | 0.237738089 |
| Bcdin3d 75284        | -1.180878064 | 0.310006218 | -1.180878064 | 0.310006218 |
| Pip5k1c 18717        | -1.180920661 | 0.041856401 | -1.228011277 | 0.016167292 |
| Snap29 67474         | -1.180975148 | 0.125412786 | -1.299736092 | 0.032282349 |
| Odz3 23965           | -1.180983377 | 0.241507481 | 1.04910357   | 0.407993746 |
| Dock3 208869         | -1.181004543 | 0.328505951 | -1.535911791 | 0.137738471 |
| Hnf1b 21410          | -1.181010451 | 0.015079492 | -1.181010451 | 0.015079492 |
| Apoc1 11812          | -1.181223405 | 0.306402576 | -1.233790023 | 0.18908148  |
| Cfl2 12632           | -1.181254063 | 0.187562969 | -1.304682434 | 0.050927328 |
| Trmt2b 215201        | -1.181266362 | 0.086309358 | -1.116868491 | 0.166124481 |
| A830007P12Rik 227612 | -1.181267257 | 0.219952458 | -1.080752454 | 0.362806124 |
| Atxn2 20239          | -1.181315508 | 0.106353001 | -1.177102624 | 0.046915596 |
| Ccr7 12775           | -1.181338568 | 0.40127872  | -2.192782516 | 0.152660237 |
| Il6st 16195          | -1.181378255 | 0.172002663 | -1.066851585 | 0.340354113 |
| Ston1 77057          | -1.181398122 | 0.386586029 | -1.061243569 | 0.437578471 |
| Tmem51 214359        | -1.181546858 | 0.182413871 | -1.312991148 | 0.076175682 |
| Plekhh3 217198       | -1.181632417 | 0.088451247 | -1.181632417 | 0.088451247 |
| Lrwd1 71735          | -1.181662689 | 0.210727284 | -1.33265202  | 0.042449156 |
| Hoxa2 15399          | -1.181710067 | 0.417022793 | -1.047938656 | 0.479862512 |
| 0610040J01Rik 76261  | -1.181739622 | 0.019647036 | -1.151213157 | 0.041876547 |
| Lrp3 435965          | -1.181773899 | 0.139960663 | -1.002034332 | 0.492384746 |
| Tmem180 75146        | -1.18187193  | 0.238738414 | -1.282751502 | 0.142356289 |
| 4732471J01Rik 654804 | -1.181932446 | 0.406525725 | -1.526084848 | 0.310510956 |
| Blzf1 66352          | -1.18200175  | 0.324221195 | -1.648375365 | 0.073087389 |
| Nme2 18103           | -1.182031114 | 0.193642932 | -1.117144587 | 0.231344586 |
| Lonrf1 244421        | -1.182043806 | 0.275021566 | -1.028656674 | 0.454564615 |
| Adhfe1 76187         | -1.182097759 | 0.221082915 | -1.031740819 | 0.435113169 |
| Pigg 433931          | -1.182153956 | 0.35016718  | 1.123016731  | 0.281889663 |
| Ttc38 239570         | -1.182200518 | 0.046855344 | -1.223537548 | 0.00478893  |
| Elmo2 140579         | -1.182244735 | 0.153101259 | -1.079817106 | 0.302120126 |
| Shmt1 20425          | -1.182289893 | 0.020166559 | -1.188276367 | 0.004586364 |
| Naglu 27419          | -1.182302937 | 0.127139396 | -1.099683704 | 0.246290621 |

|                       |              |             |              |             |
|-----------------------|--------------|-------------|--------------|-------------|
| Mrpl34 94065          | -1.182463504 | 0.197380201 | -1.067054239 | 0.354423999 |
| 120001118Rik 67467    | -1.182639014 | 0.191683859 | -1.335517814 | 0.068264706 |
| Cdon 57810            | -1.182686751 | 0.35660964  | -1.182686751 | 0.35660964  |
| Zbtb7b 22724          | -1.182736608 | 0.048119468 | -1.210994551 | 0.010416444 |
| Tbc1d23 67581         | -1.182962797 | 0.338947979 | -1.570478272 | 0.147375224 |
| Lmf2 105847           | -1.183039036 | 0.037579482 | -1.152394431 | 0.071661572 |
| Rps6ka4 56613         | -1.183064306 | 0.104247335 | -1.190227267 | 0.013194608 |
| Rwdd4a 192174         | -1.18308902  | 0.119669969 | -1.287737854 | 0.040497262 |
| Nufip1 27275          | -1.183160399 | 0.241890317 | -1.192992271 | 0.160429752 |
| Srsf3 20383           | -1.183297529 | 0.223296704 | -1.041259743 | 0.412762324 |
| Phf3 213109           | -1.183303586 | 0.169339862 | -1.055422787 | 0.354467499 |
| Copz2 56358           | -1.183306886 | 0.183061301 | -1.062905825 | 0.358097588 |
| Ints3 229543          | -1.183325557 | 0.124440722 | -1.297870188 | 0.036414059 |
| Nipsnap3b 66536       | -1.183502695 | 0.104499141 | -1.183502695 | 0.104499141 |
| Myh14 71960           | -1.183518471 | 0.072742354 | -1.258997843 | 0.027167428 |
| Trim26 22670          | -1.183532262 | 0.122864674 | -1.07616304  | 0.260327599 |
| Slc10a7 76775         | -1.183556547 | 0.246233654 | -1.151142618 | 0.222051461 |
| Btaf1 107182          | -1.183622642 | 0.285716975 | -1.068219209 | 0.41084246  |
| Tbc1d16 207592        | -1.183682481 | 0.143043247 | -1.193699127 | 0.054767808 |
| 1190002N15Rik 68861   | -1.183777717 | 0.280314684 | 1.004707832  | 0.493153752 |
| Gabrd 14403           | -1.183874881 | 0.408098998 | -2.380122345 | 0.157676859 |
| Srsf7 225027          | -1.183879948 | 0.311762867 | -1.183879948 | 0.311762867 |
| Pex7 18634            | -1.183926578 | 0.118389275 | -1.304931805 | 0.026980562 |
| Plxnc1 54712          | -1.183991153 | 0.325969912 | 1.051561834  | 0.446384571 |
| Ttll12 223723         | -1.184062361 | 0.160844359 | -1.310291496 | 0.024520985 |
| Nup62-il4i1 100328588 | -1.184067473 | 0.401409977 | -1.179215768 | 0.419092101 |
| Slc28a1 434203        | -1.184167091 | 0.417313686 | 2.166774358  | 0.161185597 |
| Spata2 78779          | -1.184174535 | 0.179455781 | -1.29837249  | 0.090932252 |
| Ncf1 17969            | -1.184292296 | 0.2680813   | -1.65422384  | 0.012127996 |
| Igsf3 78908           | -1.184496858 | 0.376603391 | -1.951633713 | 0.119335212 |
| Exph5 320051          | -1.18457728  | 0.29793411  | 1.008782606  | 0.488930826 |
| Macf1 11426           | -1.184583873 | 0.212412923 | -1.033940398 | 0.410673182 |
| 40976 71779           | -1.184589451 | 0.208689478 | -1.062294929 | 0.340267131 |
| Scand1 19018          | -1.184598263 | 0.376455525 | -1.804446466 | 0.160795832 |
| Ppp2r5d 21770         | -1.184612703 | 0.002195332 | -1.151051683 | 0.002750946 |
| Astn2 56079           | -1.184621583 | 0.263957912 | -1.389112782 | 0.05202758  |
| Tbc1d12 209478        | -1.184634694 | 0.332625847 | -1.184634694 | 0.332625847 |
| Nfyb 18045            | -1.184716159 | 0.180232034 | 1.025853819  | 0.420029302 |
| Cdc42ep1 104445       | -1.18479094  | 0.121327731 | -1.283364225 | 0.048174309 |
| Zkscan17 268417       | -1.184803166 | 0.10156674  | -1.118345946 | 0.188416633 |
| Aqp9 64008            | -1.184836409 | 0.023203479 | -1.156520373 | 0.048181491 |
| Commd1 17846          | -1.184878179 | 0.112810769 | -1.009335953 | 0.455697684 |
| 1600016N20Rik 72000   | -1.18502187  | 0.377282582 | -1.81241281  | 0.161792722 |
| Prpf39 328110         | -1.18506915  | 0.257163773 | -1.571682804 | 0.030586501 |
| Usp32 237898          | -1.185199989 | 0.332116745 | -1.095676881 | 0.392710739 |
| Gdf6 242316           | -1.18525056  | 0.397496392 | 1.315138262  | 0.351077048 |
| 5031439G07Rik 223739  | -1.18529244  | 0.007249592 | -1.230988983 | 0.001618544 |
| Madd 228355           | -1.185331452 | 0.046987853 | -1.125280302 | 0.095537706 |
| Eif2c1 236511         | -1.185466132 | 0.217174736 | -1.370892531 | 0.073871498 |
| Aco1 11428            | -1.185510195 | 0.05404611  | -1.125474269 | 0.109759573 |
| Anapc4 52206          | -1.185557116 | 0.102996204 | -1.185557116 | 0.102996204 |
| Foxj3 230700          | -1.185620921 | 0.299616776 | -1.007570916 | 0.487057093 |
| Twf1 19230            | -1.185645132 | 0.203023768 | 1.075095069  | 0.276774895 |

|                         |              |             |              |             |
|-------------------------|--------------|-------------|--------------|-------------|
| Commd4 66199            | -1.185743705 | 0.18743837  | 1.034111837  | 0.391772336 |
| Smc3 13006              | -1.185753016 | 0.202851941 | -1.331104726 | 0.090529816 |
| Eri2 71151              | -1.185776828 | 0.29104238  | -1.185776828 | 0.29104238  |
| Fbxl14 101358           | -1.185840954 | 0.267889482 | 1.037532897  | 0.432223944 |
| Luc7l 66978             | -1.185903933 | 0.051248053 | -1.221068398 | 0.041158619 |
| Hdac7 56233             | -1.185991711 | 0.155201873 | -1.390394083 | 0.005146795 |
| BC030336 233812         | -1.186023289 | 0.25961273  | 1.14174269   | 0.230782895 |
| Tgm2 21817              | -1.186147446 | 0.039118027 | -1.14206395  | 0.079037924 |
| Rpa2 19891              | -1.186252808 | 0.193469682 | -1.186252808 | 0.193469682 |
| Vars 22321              | -1.186279908 | 0.048651663 | -1.186279908 | 0.048651663 |
| Copa 12847              | -1.186333961 | 0.112011722 | -1.112665646 | 0.208274215 |
| Hipk1 15257             | -1.186352642 | 0.212251223 | -1.015970396 | 0.461448201 |
| 1700047M11Rik 67330     | -1.186365023 | 0.381507521 | -1.621424424 | 0.232180346 |
| Man1b1 227619           | -1.186548235 | 0.118811624 | -1.313264566 | 0.024772404 |
| 1110037F02Rik 66185     | -1.186554203 | 0.137701052 | -1.002749851 | 0.489906204 |
| Plekhg6 213522          | -1.186636119 | 0.170585015 | -1.31076703  | 0.037377748 |
| Snx33 235406            | -1.186740647 | 0.106201232 | -1.098544903 | 0.217241969 |
| Hdgfrp2 15193           | -1.187322281 | 0.114699278 | -1.273741303 | 0.0543694   |
| Inpp5f 101490           | -1.187418731 | 0.176427874 | -1.051524001 | 0.369969343 |
| Cmah 12763              | -1.187610807 | 0.173430323 | -1.061701672 | 0.352081287 |
| Pspc1 66645             | -1.187628651 | 0.294808609 | -1.155816692 | 0.221420862 |
| Atp8b5 320571           | -1.187667298 | 0.367581033 | -1.39864107  | 0.187975053 |
| Arrdc1 215705           | -1.187710707 | 0.263897658 | -1.187710707 | 0.263897658 |
| Btbd1 83962             | -1.187892391 | 0.10343297  | -1.025762486 | 0.390714398 |
| Psme4 103554            | -1.187901599 | 0.138545737 | -1.082653764 | 0.273986298 |
| Xrcc6 14375             | -1.187924832 | 0.227460308 | -1.187924832 | 0.227460308 |
| Rab20 19332             | -1.187961851 | 0.288906759 | -1.187961851 | 0.288906759 |
| Mblac1 330216           | -1.187965817 | 0.356436261 | -2.278992298 | 0.010111503 |
| Sympk 68188             | -1.188070046 | 0.085396215 | -1.188070046 | 0.085396215 |
| Pigy 66459              | -1.18808105  | 0.051690297 | -1.167888348 | 0.016209467 |
| Khynyn 219094           | -1.188139776 | 0.229828108 | -1.052905473 | 0.409836055 |
| 1700113I22Rik 73635     | -1.18818898  | 0.348978125 | -1.18818898  | 0.348978125 |
| Srrm1 51796             | -1.188318688 | 0.182621165 | -1.052901631 | 0.374639544 |
| 5830417I10Rik 100302730 | -1.188349865 | 0.227586851 | -1.002493485 | 0.494377276 |
| 1110057K04Rik 68832     | -1.188508617 | 0.117833829 | -1.122307697 | 0.081320084 |
| Stt3a 16430             | -1.188529826 | 0.06846116  | -1.255912693 | 0.018894287 |
| Mpv17 17527             | -1.188531759 | 0.07854828  | -1.274803738 | 0.02551084  |
| Nos3 18127              | -1.188576752 | 0.182678887 | -1.1772446   | 0.155489754 |
| Nat15 74763             | -1.188601518 | 0.01334655  | -1.153012327 | 0.028366507 |
| Serhl 68607             | -1.18863617  | 0.176099962 | -1.185056102 | 0.156308764 |
| Aco2 11429              | -1.188706883 | 0.039836052 | -1.27170375  | 0.005271656 |
| Dtx2 74198              | -1.188725373 | 0.258767358 | -1.089097626 | 0.383169603 |
| Tm9sf4 99237            | -1.188782606 | 0.008144265 | -1.228132989 | 0.001693566 |
| Sema6c 20360            | -1.188798572 | 0.3221308   | -1.569931691 | 0.122318932 |
| Tctn3 67590             | -1.188909865 | 0.3806193   | 1.403650437  | 0.251424635 |
| Fmo1 14261              | -1.188925254 | 0.035368928 | -1.07443589  | 0.119407509 |
| Fam20b 215015           | -1.188971076 | 0.143321251 | -1.188971076 | 0.143321251 |
| Whsc1l1 234135          | -1.188983085 | 0.176901873 | 1.040630663  | 0.347763928 |
| Pla2g15 192654          | -1.189139103 | 0.143949309 | -1.056233152 | 0.310841777 |
| Atf7ip 54343            | -1.189289235 | 0.150719384 | -1.189289235 | 0.150719384 |
| Ppih 66101              | -1.189569892 | 0.238785002 | -1.263173496 | 0.179390186 |
| Fam198a 245050          | -1.189602734 | 0.221395816 | -1.356764427 | 0.043772165 |
| Xiap 11798              | -1.189687474 | 0.336928684 | 1.183206025  | 0.308082511 |

|                      |              |             |              |             |
|----------------------|--------------|-------------|--------------|-------------|
| Mpst 246221          | -1.189746597 | 0.101540847 | -1.274596536 | 0.045339778 |
| Btbd2 208198         | -1.18996488  | 0.128039446 | -1.250151095 | 0.092658356 |
| Pycrl 66194          | -1.189979299 | 0.129157262 | -1.283314091 | 0.062903567 |
| Gm10778 100233208    | -1.190266316 | 0.355977118 | -1.881392253 | 0.086276412 |
| Marcksl1-ps4 111002  | -1.190361939 | 0.138611315 | -1.30164118  | 0.026626172 |
| Nfe2l1 18023         | -1.190401455 | 0.055425549 | -1.102084521 | 0.090381491 |
| Bloc1s1 14533        | -1.190470199 | 0.15865867  | -1.455474156 | 0.004997838 |
| Ptpn11 19247         | -1.190482186 | 0.200418854 | -1.026473178 | 0.435010238 |
| Chmp2b 68942         | -1.190493478 | 0.206225552 | -1.500351152 | 0.00986593  |
| Mthfd1 270685        | -1.190538202 | 0.324060563 | 1.310912687  | 0.161369813 |
| Snrpa 53607          | -1.190756648 | 0.144860141 | -1.205857347 | 0.081254837 |
| Map3k2 26405         | -1.19077692  | 0.285750344 | -1.146361529 | 0.290202708 |
| Marveld2 218518      | -1.190858314 | 0.27062995  | -1.158294314 | 0.256532477 |
| Pcm1 18536           | -1.190933255 | 0.274938298 | 1.058725433  | 0.396563009 |
| Ubash3b 72828        | -1.190939197 | 0.335968732 | 1.037180287  | 0.46643771  |
| Tor1aip2 240832      | -1.190945057 | 0.137364406 | -1.076521669 | 0.287877729 |
| Rufy1 216724         | -1.190969824 | 0.10328693  | -1.190969824 | 0.10328693  |
| Pank4 269614         | -1.191072795 | 0.215817307 | -1.262883597 | 0.104075947 |
| Hdac3 15183          | -1.19112338  | 0.100124952 | -1.238152816 | 0.067505265 |
| Fbln2 14115          | -1.191449385 | 0.386354681 | -2.393278761 | 0.015938416 |
| Heatr6 217026        | -1.191456489 | 0.028332531 | -1.28248408  | 0.000814465 |
| 2510012J08Rik 70312  | -1.191466352 | 0.070993248 | -1.299742581 | 0.009197971 |
| Fam169b 434197       | -1.191498236 | 0.057097201 | -1.054527972 | 0.186175801 |
| Klhl28 66689         | -1.191630268 | 0.404464512 | -2.460909091 | 0.146965028 |
| Mlh1 17350           | -1.191631895 | 0.188877369 | -1.357941972 | 0.062192833 |
| Gm6548 625054        | -1.191703375 | 0.135367391 | -1.193563657 | 0.172584357 |
| 1700037H04Rik 67326  | -1.19178294  | 0.157606183 | -1.229173366 | 0.05612166  |
| Evc2 68525           | -1.191837102 | 0.331879566 | -1.414122693 | 0.224242655 |
| Thsd1 56229          | -1.191868193 | 0.132750629 | -1.074416542 | 0.275358613 |
| Fbxo34 78938         | -1.192017734 | 0.133486112 | -1.097378392 | 0.262376202 |
| Ppil1 68816          | -1.192126202 | 0.137646546 | -1.451505324 | 0.001473098 |
| Usp40 227334         | -1.192281653 | 0.048584923 | -1.192207998 | 0.016814561 |
| Usp34 17847          | -1.192437971 | 0.283866315 | -1.504943863 | 0.041350996 |
| Ttbk1 106763         | -1.192595796 | 0.400700834 | -2.999295613 | 0.068065451 |
| 1110014N23Rik 68505  | -1.192616223 | 0.014473108 | -1.218523077 | 0.001227859 |
| Slc3a2 17254         | -1.192638395 | 0.028682214 | -1.192638395 | 0.028682214 |
| Sec16b 89867         | -1.192709686 | 0.186968968 | -1.192709686 | 0.186968968 |
| Cd200r4 239849       | -1.192742857 | 0.430599145 | 1            | #DIV/0!     |
| Crb2 241324          | -1.192742857 | 0.430599145 | 1            | #DIV/0!     |
| Elane 50701          | -1.192742857 | 0.430599145 | 1            | #DIV/0!     |
| Shisa9 72555         | -1.192742857 | 0.430599145 | 1            | #DIV/0!     |
| Cyp4a30b-ps 435802   | -1.192742857 | 0.430599145 | 1            | #DIV/0!     |
| Neto2 74513          | -1.192742857 | 0.430599145 | 1            | #DIV/0!     |
| Trak2 70827          | -1.192820078 | 0.240138348 | -1.130551373 | 0.270635153 |
| Zfp358 140482        | -1.19283488  | 0.22587418  | -1.236149541 | 0.149570614 |
| Tgfb1 21803          | -1.192871526 | 0.135931013 | -1.089084272 | 0.265900179 |
| Rhobtb2 246710       | -1.192888774 | 0.134306948 | -1.143794805 | 0.061074589 |
| Dusp28 67446         | -1.192909353 | 0.193018864 | -1.067214428 | 0.365745316 |
| Mup8 100041687       | -1.192939758 | 0.360574896 | -1.192939758 | 0.360574896 |
| Krt8 16691           | -1.193265312 | 0.048947494 | -1.13521847  | 0.099439529 |
| Ccdc66 320234        | -1.1933491   | 0.30115201  | 1.095827192  | 0.366198229 |
| Wrap53 216853        | -1.193398383 | 0.131348977 | -1.076587489 | 0.278537921 |
| A530054K11Rik 212281 | -1.193494036 | 0.414041309 | -2.097875187 | 0.183399184 |

|                     |              |             |              |             |
|---------------------|--------------|-------------|--------------|-------------|
| Rbfox2 93686        | -1.193569137 | 0.096512568 | -1.093165963 | 0.200674903 |
| Dock8 76088         | -1.193631402 | 0.158052262 | -1.119641375 | 0.152848068 |
| Cox18 231430        | -1.193664328 | 0.161812596 | -1.109292808 | 0.283497484 |
| Gm2058 100039133    | -1.193707926 | 0.208716875 | 1.066713535  | 0.337769265 |
| Ralgapa2 241694     | -1.193789927 | 0.287056611 | -1.19503946  | 0.278311605 |
| Ubqln4 94232        | -1.193838744 | 0.175968734 | -1.02815997  | 0.410555473 |
| Cyp3a13 13113       | -1.193935977 | 0.057048514 | -1.35329182  | 0.00100754  |
| Zfp661 72180        | -1.193989233 | 0.303801339 | 1.060079938  | 0.42589396  |
| Zfp667 384763       | -1.194132443 | 0.29575558  | 1.075692204  | 0.393896883 |
| Med13l 76199        | -1.194137903 | 0.272356272 | 1.036216976  | 0.441358089 |
| Slc25a38 208638     | -1.194182626 | 0.044278201 | -1.194182626 | 0.044278201 |
| Zfp90 22751         | -1.194240485 | 0.352815327 | 1.132042399  | 0.396739622 |
| Ppie 56031          | -1.194265842 | 0.159003347 | -1.004623978 | 0.487245331 |
| Uhrf1bp1 224648     | -1.194401567 | 0.162009228 | 1.008553299  | 0.475279562 |
| Tut1 70044          | -1.194600369 | 0.045302485 | -1.062349724 | 0.1564885   |
| Mib1 225164         | -1.194602204 | 0.163538443 | 1.023503514  | 0.424651408 |
| Dhrs9 241452        | -1.194664337 | 0.416250627 | -1.098041369 | 0.467419217 |
| Zgpat 229007        | -1.194681565 | 0.082699104 | -1.212157415 | 0.007472175 |
| Gpi1 14751          | -1.194696723 | 0.069242468 | -1.169262994 | 0.040611335 |
| 9130019022Rik 78921 | -1.194815666 | 0.348433287 | 1.127818724  | 0.395537699 |
| Akr1a1 58810        | -1.194989215 | 0.030155145 | -1.247384043 | 0.014010061 |
| Nup188 227699       | -1.195045466 | 0.175874983 | -1.278130311 | 0.099649315 |
| Ormdl2 66844        | -1.195131319 | 0.088597131 | -1.095283056 | 0.182930798 |
| Fads2 56473         | -1.195191337 | 0.102516713 | -1.276730448 | 0.032070558 |
| Rab23 19335         | -1.19521021  | 0.325948719 | -1.461063298 | 0.195340754 |
| Klhdc8b 78267       | -1.195346217 | 0.237005434 | -1.195346217 | 0.237005434 |
| Fam111a 107373      | -1.19538846  | 0.355460589 | -1.276583848 | 0.321544893 |
| Mgmt 17314          | -1.195396988 | 0.099189251 | -1.195396988 | 0.099189251 |
| Cnot1 234594        | -1.195468044 | 0.152201891 | -1.04140944  | 0.350028703 |
| Ube2v1 66589        | -1.195479576 | 0.084821673 | -1.259828361 | 0.05015806  |
| Lrba 80877          | -1.195494828 | 0.147436954 | -1.424277938 | 0.005855252 |
| Gns 75612           | -1.19562535  | 0.045981841 | -1.19562535  | 0.045981841 |
| Fabp2 14079         | -1.195854435 | 0.123325194 | -1.331074215 | 0.027856971 |
| Pcx 18563           | -1.195892016 | 0.066422358 | -1.195892016 | 0.066422358 |
| Anapc5 59008        | -1.195899829 | 0.042230354 | -1.269001523 | 0.011937135 |
| C8g 69379           | -1.195917863 | 0.169645219 | -1.346959668 | 0.057611515 |
| Ece1 230857         | -1.19605451  | 0.019575069 | -1.15141083  | 0.041558016 |
| Ppfibp2 19024       | -1.19608443  | 0.236008847 | -1.569682922 | 0.023213359 |
| Vac14 234729        | -1.196110288 | 0.098960466 | -1.126239685 | 0.183995857 |
| Dhx40 67487         | -1.196129069 | 0.03565019  | -1.286988713 | 0.002832624 |
| Homer3 26558        | -1.196136188 | 0.209887096 | -1.37194044  | 0.083115019 |
| Taf5 226182         | -1.196181843 | 0.275885386 | -1.073217867 | 0.386015501 |
| Ppp1r37 232947      | -1.196272383 | 0.059480456 | -1.196272383 | 0.059480456 |
| BC031361 414072     | -1.196284039 | 0.38805376  | 1.290499932  | 0.353081854 |
| Cds2 110911         | -1.196291637 | 0.145390707 | -1.154701441 | 0.124008289 |
| Kdm3b 277250        | -1.19647653  | 0.268292994 | -1.23345484  | 0.143246426 |
| Fzd8 14370          | -1.196588044 | 0.260407008 | -1.032901006 | 0.453170018 |
| Pcif1 228866        | -1.196643984 | 0.007119188 | -1.214274281 | 0.000877244 |
| Hagh 14651          | -1.1966753   | 0.017355946 | -1.253101981 | 0.001591343 |
| Mtif2 76784         | -1.196796125 | 0.152501554 | -1.073438839 | 0.315787363 |
| Gripap1 54645       | -1.196895701 | 0.122414636 | -1.022645378 | 0.423753021 |
| Ifi27l2a 76933      | -1.196896571 | 0.3089922   | 1.251117691  | 0.205634827 |
| Abcg5 27409         | -1.196911418 | 0.127129338 | -1.196911418 | 0.127129338 |

|                     |              |             |              |             |
|---------------------|--------------|-------------|--------------|-------------|
| Mfi2 30060          | -1.196948511 | 0.419650593 | -6.462983333 | 0.044795474 |
| Gsta4 14860         | -1.196973832 | 0.23293473  | -1.637411141 | 0.004161129 |
| Usp12 22217         | -1.197153529 | 0.093851172 | -1.168600685 | 0.083333983 |
| Eif2d 16865         | -1.197324896 | 0.065755478 | -1.14594096  | 0.123598983 |
| Gm129 229599        | -1.197432156 | 0.308157205 | -1.404048116 | 0.142179457 |
| Ric8 101489         | -1.197492089 | 0.059066896 | -1.156777032 | 0.027892204 |
| Gzf1 74533          | -1.197702137 | 0.221914574 | -1.045847213 | 0.418593413 |
| Cldn25 224250       | -1.197924945 | 0.197087146 | -1.359641894 | 0.030861641 |
| Fam102a 98952       | -1.197999509 | 0.257758375 | 1.061455313  | 0.362405805 |
| Arhgef7 54126       | -1.198086727 | 0.098877727 | -1.413373329 | 0.001452021 |
| Dchs1 233651        | -1.198092305 | 0.11215093  | -1.411519114 | 0.003954513 |
| Zfp259 22687        | -1.198119049 | 0.097073164 | -1.198119049 | 0.097073164 |
| Stk10 20868         | -1.198120681 | 0.281455724 | -1.198120681 | 0.281455724 |
| Prmt7 214572        | -1.198298655 | 0.126886947 | -1.410998622 | 0.007408349 |
| Actr1b 226977       | -1.198310487 | 0.051298242 | -1.263769199 | 0.012504614 |
| Tbcc 72726          | -1.198345608 | 0.074509238 | -1.209351945 | 0.035903424 |
| Aph1b 208117        | -1.198407714 | 0.365257595 | -1.908279758 | 0.124545333 |
| Clasrp 53609        | -1.19857534  | 0.15750981  | 1.015325722  | 0.452232598 |
| Ngef 53972          | -1.19857791  | 0.143735667 | -1.467267263 | 0.00318287  |
| Rnf157 217340       | -1.198580712 | 0.248788559 | -1.353216157 | 0.104386133 |
| Rab28 100972        | -1.198622332 | 0.269799763 | -1.198622332 | 0.269799763 |
| Atmin 234776        | -1.198785853 | 0.301644766 | 1.256683971  | 0.168963115 |
| Inpp5k 19062        | -1.199198885 | 0.17536971  | -1.363783837 | 0.055617287 |
| 1700034H14Rik 67105 | -1.199204582 | 0.223920995 | -1.1895407   | 0.130694279 |
| Setd6 66083         | -1.199239726 | 0.150011974 | -1.110404687 | 0.27299533  |
| Cep57 74360         | -1.199243054 | 0.275976688 | 1.046117138  | 0.427980467 |
| Glo1 109801         | -1.199248627 | 0.117477098 | -1.189054921 | 0.058373691 |
| Mras 17532          | -1.199306841 | 0.240025116 | -1.663946403 | 0.004359485 |
| Cyb561d1 72023      | -1.199309814 | 0.126369652 | -1.106777811 | 0.247266345 |
| Elac2 68626         | -1.199549706 | 0.023468428 | -1.231175375 | 0.004549637 |
| Safb2 224902        | -1.199550057 | 0.063206487 | -1.199550057 | 0.063206487 |
| Rnf19b 75234        | -1.199649026 | 0.015804137 | -1.199649026 | 0.015804137 |
| Ssr1 107513         | -1.199662444 | 0.012922763 | -1.106235125 | 0.032400336 |
| Zcchc4 78796        | -1.20003173  | 0.229872807 | -1.20003173  | 0.229872807 |
| Acads 11409         | -1.20012453  | 0.105054711 | -1.090341447 | 0.220461164 |
| Ddr1 12305          | -1.200161222 | 0.277107466 | -1.11261791  | 0.376948722 |
| Cldn2 12738         | -1.200206076 | 0.177839571 | -1.109046395 | 0.293685822 |
| Adam17 11491        | -1.200234125 | 0.083945742 | -1.197900001 | 0.022840959 |
| Tnk2 51789          | -1.200345461 | 0.093351003 | -1.136577812 | 0.117840383 |
| Thoc5 107829        | -1.200418829 | 0.183977431 | -1.450016149 | 0.012149238 |
| Ankrd55 77318       | -1.200504172 | 0.386574664 | 1.285963437  | 0.356199084 |
| Ppp1r16a 73062      | -1.200505867 | 0.049491354 | -1.200505867 | 0.049491354 |
| Ccdc137 67291       | -1.200517962 | 0.303227639 | -1.41704079  | 0.157759493 |
| Arl2 56327          | -1.20054345  | 0.216969124 | -1.293736703 | 0.160940308 |
| Itpr3 16440         | -1.20057285  | 0.341463793 | -1.309647944 | 0.265121696 |
| Zfp324 243834       | -1.200595141 | 0.16932067  | -1.267961656 | 0.073639736 |
| F5 14067            | -1.200652666 | 0.074039887 | -1.17650333  | 0.061449783 |
| Il18 16173          | -1.200736554 | 0.291869226 | 1.035355234  | 0.454979377 |
| Cd82 12521          | -1.20078153  | 0.007026065 | -1.20078153  | 0.007026065 |
| Smu1 74255          | -1.200825419 | 0.094335843 | -1.200825419 | 0.094335843 |
| Ccnc 51813          | -1.200880986 | 0.180068059 | -1.052937168 | 0.377054039 |
| Tdrkh 72634         | -1.200962826 | 0.347962857 | -1.432225987 | 0.252744652 |
| Upp1 22271          | -1.201042196 | 0.313241125 | -1.606892048 | 0.109628312 |

|                     |              |             |              |             |
|---------------------|--------------|-------------|--------------|-------------|
| Pydc3 100033459     | -1.201051956 | 0.414099221 | 1.266333228  | 0.381642687 |
| Ugt2b1 71773        | -1.201174127 | 0.188145484 | -1.12743402  | 0.213809206 |
| Cyp7b1 13123        | -1.201186724 | 0.213695104 | -1.467935231 | 0.030368451 |
| Rab7 19349          | -1.201214997 | 0.293162129 | -1.193864286 | 0.295146114 |
| Qk 19317            | -1.201217139 | 0.32152903  | 1.184565721  | 0.27184952  |
| Supt7l 72195        | -1.201249271 | 0.15253735  | -1.327204791 | 0.003820814 |
| Mbtps2 270669       | -1.201414584 | 0.31605982  | -1.157374094 | 0.343895246 |
| Wnt9a 216795        | -1.201437288 | 0.400980188 | -1.201437288 | 0.400980188 |
| Zfp397 69256        | -1.201527187 | 0.255256468 | -1.082319528 | 0.384887871 |
| St3gal6 54613       | -1.201711576 | 0.322612434 | -1.668311527 | 0.103313308 |
| Pigs 276846         | -1.201720953 | 0.100054933 | -1.15086783  | 0.174236261 |
| Zfr2 103406         | -1.201901175 | 0.326086046 | 1.034606158  | 0.467904927 |
| Clstn1 65945        | -1.202054162 | 0.274347242 | -1.202054162 | 0.274347242 |
| Raver1 71766        | -1.202067216 | 0.147719862 | -1.202067216 | 0.147719862 |
| Cox15 226139        | -1.202144591 | 0.07799902  | -1.046327188 | 0.301792544 |
| Dact2 240025        | -1.202162757 | 0.168651239 | -1.195062965 | 0.098597186 |
| Slc30a6 210148      | -1.202207142 | 0.114639889 | -1.202207142 | 0.114639889 |
| Lactb2 212442       | -1.202244916 | 0.265823333 | 1.012517221  | 0.480867    |
| Bag6 224727         | -1.202247367 | 0.014643009 | -1.304044482 | 0.000680675 |
| Palmd 114301        | -1.202353041 | 0.155057162 | -1.300118184 | 0.064109431 |
| Dtx3l 209200        | -1.202510353 | 0.079602557 | -1.036481462 | 0.290615835 |
| Mtfr1 67472         | -1.202514105 | 0.198207772 | -1.036041713 | 0.419871909 |
| Txndc5 105245       | -1.202624324 | 0.041793875 | -1.356028281 | 0.000410427 |
| Tgif2 228839        | -1.20265012  | 0.352121254 | -1.20265012  | 0.352121254 |
| Phc1 13619          | -1.202789204 | 0.259302634 | -1.202789204 | 0.259302634 |
| Aldh5a1 214579      | -1.202800229 | 0.04130625  | -1.215228562 | 0.006666024 |
| Sirpa 19261         | -1.202825776 | 0.142731921 | -1.103939527 | 0.273298852 |
| Fbrs 14123          | -1.202961928 | 0.081920261 | -1.202961928 | 0.081920261 |
| Tlr12 384059        | -1.202965084 | 0.228351293 | 1.044369319  | 0.343077954 |
| Apool 68117         | -1.203005172 | 0.163931481 | -1.075242596 | 0.330803981 |
| 1700001L05Rik 69291 | -1.20307156  | 0.312927701 | -1.719950087 | 0.062676191 |
| Siae 22619          | -1.203151677 | 0.20877755  | -1.015473688 | 0.463847839 |
| Paqr4 76498         | -1.203154686 | 0.204953343 | -1.06551548  | 0.382287319 |
| Rap2c 72065         | -1.203163604 | 0.193915982 | -1.101775172 | 0.250947593 |
| Aldh9a1 56752       | -1.203219194 | 0.049499164 | -1.125039713 | 0.095133127 |
| Myo6 17920          | -1.203285917 | 0.254639918 | -1.039682481 | 0.362196282 |
| Zfp652 268469       | -1.203483512 | 0.174010747 | 1.026747453  | 0.42514123  |
| Lrrc61 243371       | -1.203555912 | 0.019327682 | -1.156240254 | 0.039352667 |
| R3hcc1 71843        | -1.203743726 | 0.133034089 | -1.305069364 | 0.066998231 |
| BC006779 229003     | -1.203752245 | 0.162927916 | -1.056278041 | 0.279483636 |
| Nufip2 68564        | -1.203815044 | 0.254855669 | 1.038582265  | 0.426216276 |
| Gpatch2 67769       | -1.203847629 | 0.24471579  | -1.070296952 | 0.392809486 |
| Cops7b 26895        | -1.203873875 | 0.063043674 | -1.203873875 | 0.063043674 |
| Papola 18789        | -1.203882935 | 0.145117529 | -1.001717228 | 0.494712548 |
| Gm6710 626832       | -1.203922289 | 0.400721857 | -3.583784352 | 0.049621606 |
| Ntn1 18208          | -1.203978221 | 0.089874381 | -1.203978221 | 0.089874381 |
| BC032203 210982     | -1.204052118 | 0.290948229 | 1.052895811  | 0.430676087 |
| Osgpl1 72085        | -1.204239008 | 0.243839382 | -1.139511469 | 0.329147486 |
| Atf2 11909          | -1.20436561  | 0.28447243  | -1.113968636 | 0.347415829 |
| Syng1 20972         | -1.20438185  | 0.365256196 | -1.20438185  | 0.365256196 |
| Zkscan3 72739       | -1.204426544 | 0.16135261  | -1.081026365 | 0.31099272  |
| Dok1 13448          | -1.204532575 | 0.148146183 | -1.00268344  | 0.4908978   |
| Gins4 109145        | -1.20457146  | 0.209761312 | -1.20457146  | 0.209761312 |



|                |              |             |              |             |
|----------------|--------------|-------------|--------------|-------------|
| Mttr10 233315  | -1.204719919 | 0.086746081 | -1.157368673 | 0.083018866 |
| Acaa2 52538    | -1.204758372 | 0.024462895 | -1.108638705 | 0.070716409 |
| Immt 76614     | -1.204913053 | 0.040635264 | -1.126700877 | 0.079272661 |
| Sod3 20657     | -1.205079673 | 0.104277654 | -1.289907324 | 0.021314336 |
| Cpped1 223978  | -1.205111774 | 0.098535422 | -1.104471308 | 0.204424219 |
| Pthr1 329384   | -1.205172117 | 0.378774538 | -1.655553952 | 0.197951841 |
| Tmem198b 73827 | -1.205180207 | 0.273636984 | -1.278846691 | 0.112168595 |
| Ctnnbl1 66642  | -1.205234351 | 0.101924736 | -1.285156245 | 0.037421695 |
| Trap1 68015    | -1.205267393 | 0.009264693 | -1.11937119  | 0.023704454 |
| Clec14a 66864  | -1.205320431 | 0.230839425 | -1.426657623 | 0.085189865 |
| Bcr 110279     | -1.205349387 | 0.030392995 | -1.277744506 | 0.007473038 |
| Zc3h12a 230738 | -1.205352701 | 0.307156519 | -1.840786998 | 0.014408614 |
| Zfp1 81909     | -1.205424272 | 0.145880065 | -1.178914949 | 0.146847956 |
| Mtm1 17772     | -1.205465035 | 0.264393934 | -1.155382378 | 0.200799067 |
| Eif2ak1 15467  | -1.205618039 | 0.009440749 | -1.258284002 | 0.000686923 |
| Gk5 235533     | -1.205646412 | 0.428701337 | 1            | #DIV/0!     |
| Adam4 11498    | -1.205646412 | 0.428701337 | 1            | #DIV/0!     |
| Fat3 270120    | -1.205646412 | 0.428701337 | 1            | #DIV/0!     |
| Alox5ap 11690  | -1.205682819 | 0.329190502 | -2.149619668 | 0.011402638 |
| Rbm19 74111    | -1.205836642 | 0.039604323 | -1.140876066 | 0.021174933 |
| Utp14a 72554   | -1.205983292 | 0.185404336 | -1.097110989 | 0.317155635 |
| Rad50 19360    | -1.206102417 | 0.171195067 | -1.419252778 | 0.024781306 |
| Commdd8 27784  | -1.206166831 | 0.185358327 | -1.520839403 | 0.011828274 |
| Mospd1 70380   | -1.206249051 | 0.351130815 | 1.171957295  | 0.369950151 |
| Foxk1 17425    | -1.206350996 | 0.195769693 | -1.206350996 | 0.195769693 |
| Synpo 104027   | -1.20639552  | 0.318676914 | 1.336553194  | 0.139326727 |
| Gnai2 14678    | -1.206449239 | 0.029362517 | -1.146018277 | 0.060419899 |
| Atp6v1g2 66237 | -1.206470215 | 0.289454376 | -1.286436303 | 0.168733536 |
| Zbtb4 75580    | -1.206536119 | 0.274773276 | -1.241466536 | 0.199316993 |
| Rnf113a1 69942 | -1.206551178 | 0.369057293 | -1.84378515  | 0.168005515 |
| Mbp 17196      | -1.206734035 | 0.383413742 | 1.059485161  | 0.460585299 |
| Bdp1 544971    | -1.206755472 | 0.249548607 | 1.051387231  | 0.385105757 |
| Pdpk1 18607    | -1.206981002 | 0.320472353 | 1.171805981  | 0.301017732 |
| Acd 497652     | -1.207018183 | 0.1168505   | -1.39857924  | 0.009958294 |
| Zfp664 269704  | -1.207106673 | 0.201070814 | -1.350968812 | 0.106274311 |
| Tubgcp2 74237  | -1.207156718 | 0.139532642 | -1.207156718 | 0.139532642 |
| Rxra 20181     | -1.207159944 | 0.020361796 | -1.275960633 | 0.00072001  |
| Gcdh 270076    | -1.207285155 | 0.006317421 | -1.236830901 | 0.003498664 |
| Mcmbp 210711   | -1.207423175 | 0.105918298 | -1.412936278 | 0.006680545 |
| Tecr 106529    | -1.207473388 | 0.074407175 | -1.232484087 | 0.018255482 |
| Dennd4c 329877 | -1.207691506 | 0.246561124 | -1.207691506 | 0.246561124 |
| Gna12 14673    | -1.20775445  | 0.261194248 | -1.033531326 | 0.454937564 |
| Rfx1 19724     | -1.20787071  | 0.203086805 | -1.04352612  | 0.413270426 |
| Erc2 238988    | -1.207874294 | 0.214727575 | -1.310709807 | 0.15424042  |
| Camsap2 67886  | -1.207968152 | 0.295852083 | -1.207968152 | 0.295852083 |
| Pla2g4b 211429 | -1.207986724 | 0.250886347 | 1.171827683  | 0.141622355 |
| Sgsm2 97761    | -1.208017895 | 0.156556243 | -1.341877931 | 0.015589908 |
| Tagap1 380608  | -1.208047913 | 0.222538168 | -1.208047913 | 0.222538168 |
| Slc38a2 67760  | -1.208248288 | 0.277844536 | 1.014378765  | 0.471657538 |
| Sdc1 20969     | -1.208275419 | 0.106797309 | -1.209751112 | 0.066926756 |
| Crk 12928      | -1.208450413 | 0.192529792 | -1.064420819 | 0.375877648 |
| Fam63a 75007   | -1.208527603 | 0.0003813   | -1.181784927 | 0.000524295 |
| Mttr12 268783  | -1.208551244 | 0.203521009 | -1.208551244 | 0.203521009 |

|                 |              |             |              |             |
|-----------------|--------------|-------------|--------------|-------------|
| Angptl2 26360   | -1.20864378  | 0.175402543 | -1.20864378  | 0.175402543 |
| Cbs 12411       | -1.208723959 | 0.102615389 | -1.184552799 | 0.046465949 |
| Atpaf2 246782   | -1.208781495 | 0.058458172 | -1.127263007 | 0.063495389 |
| Lin54 231506    | -1.208832191 | 0.251912256 | -1.043444479 | 0.439684559 |
| Gab2 14389      | -1.208887789 | 0.20311939  | -1.009842058 | 0.474568887 |
| Nab1 17936      | -1.209069588 | 0.037365553 | -1.209069588 | 0.037365553 |
| Fam171a1 269233 | -1.209079122 | 0.125969008 | -1.107489006 | 0.25056291  |
| Pppde2 28075    | -1.209129104 | 0.022354774 | -1.166018547 | 0.047188092 |
| Echdc2 52430    | -1.209159783 | 0.004841697 | -1.162253174 | 0.008082736 |
| Tmem63a 208795  | -1.209167694 | 0.100630463 | -1.26767363  | 0.060340617 |
| Prtn3 19152     | -1.209186004 | 0.431203253 | 3.53972      | 0.173296754 |
| Wdr6 83669      | -1.209189976 | 0.128558199 | -1.11504191  | 0.247609819 |
| Nucb1 18220     | -1.209201563 | 0.038259813 | -1.165560301 | 0.075680503 |
| Vps45 22365     | -1.209283884 | 0.18395394  | -1.209283884 | 0.18395394  |
| Gp5 14729       | -1.209306875 | 0.385047983 | -2.497414141 | 0.097650894 |
| Synj2bp 24071   | -1.209467086 | 0.209613368 | -1.098930252 | 0.23037566  |
| Spnb2 20742     | -1.209527736 | 0.291261726 | -1.046223335 | 0.44059931  |
| Xk 22439        | -1.209557179 | 0.228790494 | -1.485929168 | 0.051647396 |
| Pggt1b 225467   | -1.209671264 | 0.293223496 | 1.045094715  | 0.444992357 |
| Commd3 12238    | -1.209737565 | 0.045094753 | -1.29529545  | 0.010975828 |
| Al661453 224833 | -1.209754635 | 0.096351677 | -1.030903704 | 0.376009147 |
| Slco2b1 101488  | -1.210034764 | 0.012955422 | -1.211407302 | 0.001858194 |
| Tob1 22057      | -1.210100162 | 0.248483217 | -1.414403345 | 0.124931619 |
| Cdk5 12568      | -1.210115383 | 0.083503238 | -1.237803182 | 0.082583618 |
| Tmem81 74626    | -1.210195706 | 0.277815404 | -1.031062267 | 0.445784309 |
| Pim1 18712      | -1.210215556 | 0.29899093  | -1.010072561 | 0.487216288 |
| Epb4.1l5 226352 | -1.210232241 | 0.096137102 | -1.274069018 | 0.065525425 |
| Foxa2 15376     | -1.210237217 | 0.190201279 | -1.394635718 | 0.066092991 |
| Acot11 329910   | -1.210474969 | 0.299940126 | 1.043636756  | 0.450484418 |
| Lmbr1l 74775    | -1.210487662 | 0.180158837 | -1.49074474  | 0.018273065 |
| Fndc4 64339     | -1.210633805 | 0.0663147   | -1.210633805 | 0.0663147   |
| Cln5 211286     | -1.210640349 | 0.173122475 | -1.076959282 | 0.331065578 |
| Rfngl 19719     | -1.210766989 | 0.108177541 | -1.367447766 | 0.013347167 |
| Kif2a 16563     | -1.21082552  | 0.296748297 | -1.198998743 | 0.263397276 |
| Ubox5 140629    | -1.210931367 | 0.199551892 | -1.538716821 | 0.017746653 |
| Pou2f2 18987    | -1.211012735 | 0.345794347 | -1.211012735 | 0.345794347 |
| Spice1 212514   | -1.211052888 | 0.348167456 | -1.046237458 | 0.454637711 |
| Mthfd1 108156   | -1.211255365 | 0.006647062 | -1.158448327 | 0.010433223 |
| Srsf5 20384     | -1.211270815 | 0.305587276 | -1.195035922 | 0.301653816 |
| Ndufa12 66414   | -1.211353354 | 0.046419364 | -1.209128316 | 0.008648542 |
| Tug1 544752     | -1.211370969 | 0.192418398 | 1.051849374  | 0.365389802 |
| Wars2 70560     | -1.211379071 | 0.079175338 | -1.32431397  | 0.010009651 |
| Nr6a1 14536     | -1.21152842  | 0.126274063 | -1.21152842  | 0.126274063 |
| Vti1b 53612     | -1.211584353 | 0.038847146 | -1.341811639 | 0.001049009 |
| Hdac10 170787   | -1.211608642 | 0.060688347 | -1.3952213   | 3.35929E-06 |
| Car11 12348     | -1.21161033  | 0.308657706 | -1.466619557 | 0.159072296 |
| Paccin2 23970   | -1.21162072  | 0.0023583   | -1.170500639 | 0.002442873 |
| Rab3d 19340     | -1.211628318 | 0.131795599 | -1.211628318 | 0.131795599 |
| Rasgrp2 19395   | -1.211708562 | 0.09251229  | -1.190325133 | 0.083411676 |
| Ikbb 16150      | -1.211866839 | 0.052705642 | -1.211866839 | 0.052705642 |
| Nol7 70078      | -1.211898143 | 0.11820757  | -1.211898143 | 0.11820757  |
| Psmd14 59029    | -1.2119204   | 0.046830045 | -1.162218829 | 0.094077201 |
| Cdc26 66440     | -1.212023963 | 0.09513547  | -1.212023963 | 0.09513547  |

|                     |              |             |              |             |
|---------------------|--------------|-------------|--------------|-------------|
| Rell1 100532        | -1.212166845 | 0.076389875 | -1.354230169 | 0.008234538 |
| Uimc1 20184         | -1.212167696 | 0.091695407 | -1.212167696 | 0.091695407 |
| Six5 20475          | -1.212202257 | 0.128896922 | -1.367852758 | 0.02865872  |
| Hfe 15216           | -1.212373773 | 0.108013296 | -1.274248688 | 0.064493043 |
| Zfp93 22755         | -1.21245766  | 0.310354103 | -1.21245766  | 0.310354103 |
| Adcy6 11512         | -1.21246184  | 0.233507056 | 1.005140722  | 0.489905361 |
| Ccny 67974          | -1.212496655 | 0.176883442 | -1.347965869 | 0.089273246 |
| Pnn 18949           | -1.212503939 | 0.26759611  | -1.044173519 | 0.405977257 |
| Supt5h 20924        | -1.212618311 | 0.00920864  | -1.173963067 | 0.020352683 |
| Trpm7 58800         | -1.212656911 | 0.261464778 | -1.106813177 | 0.328097822 |
| Prkca 18750         | -1.212684491 | 0.282592911 | 1.187088124  | 0.193746731 |
| Eng 13805           | -1.212733961 | 0.018880941 | -1.271593505 | 0.006495318 |
| Dus3l 224907        | -1.212834731 | 0.107186328 | -1.319072938 | 0.0200047   |
| Rbm10 236732        | -1.212883457 | 0.076619038 | -1.212883457 | 0.076619038 |
| Gtpbp8 66067        | -1.213048875 | 0.332532595 | -1.213048875 | 0.332532595 |
| Angptl3 30924       | -1.213120553 | 0.129442909 | -1.482167595 | 0.001227506 |
| Nsun4 72181         | -1.21313319  | 0.196896137 | -1.090318976 | 0.349926491 |
| Ttc4 72354          | -1.213171816 | 0.03049696  | -1.162735786 | 0.063428879 |
| Pisd-ps1 236604     | -1.213189615 | 0.04491182  | -1.085294027 | 0.170644466 |
| St3gal1 20442       | -1.213295241 | 0.011872224 | -1.125752437 | 0.03627403  |
| Ltb 16994           | -1.21330913  | 0.314447679 | -2.110368957 | 0.006499867 |
| Tjp2 21873          | -1.213413814 | 0.223885604 | -1.042618113 | 0.428954156 |
| Aig1 66253          | -1.213453335 | 0.148579059 | -1.074658383 | 0.315261561 |
| Msl3 17692          | -1.213563598 | 0.069708761 | -1.129153602 | 0.14253222  |
| Crat 12908          | -1.213617763 | 0.033451214 | -1.213617763 | 0.033451214 |
| Ints9 210925        | -1.213648015 | 0.076117882 | -1.345131408 | 0.008833204 |
| Eral1 57837         | -1.213653855 | 0.043815817 | -1.284975037 | 0.000428756 |
| Ap3d1 11776         | -1.213697679 | 0.08680942  | -1.201402702 | 0.0287065   |
| Zfp692 103836       | -1.213716556 | 0.276379877 | -1.014476387 | 0.482192794 |
| Clec4g 75863        | -1.213826576 | 0.0565253   | -1.161436827 | 0.107753985 |
| Trappc6b 78232      | -1.213834552 | 0.13904926  | -1.189458034 | 0.076359371 |
| Gcat 26912          | -1.213883386 | 0.031449657 | -1.354455407 | 0.000869519 |
| Nfat5 54446         | -1.213883687 | 0.259137526 | 1.086311857  | 0.291805968 |
| 9030624J02Rik 71517 | -1.213888583 | 0.07249982  | -1.287218231 | 0.006413499 |
| Kdr 16542           | -1.213932748 | 0.273824637 | -1.00186628  | 0.497578858 |
| Hpd 15445           | -1.21398026  | 0.12596515  | -1.272975833 | 0.099407972 |
| Ttc28 209683        | -1.214002751 | 0.280317241 | -1.01565341  | 0.477909284 |
| Zfp654 72020        | -1.214016565 | 0.256161451 | 1.124931518  | 0.296056356 |
| Uba1 22201          | -1.214114945 | 0.002302856 | -1.138252999 | 0.001565539 |
| Wwp1 107568         | -1.214187721 | 0.246169955 | -1.050535963 | 0.430059381 |
| Arrdc3 105171       | -1.214221846 | 0.296751047 | -1.214221846 | 0.296751047 |
| Crebzf 233490       | -1.214338479 | 0.335449862 | -1.187016581 | 0.313958493 |
| Vps37d 194309       | -1.21436319  | 0.340043235 | -1.396366265 | 0.232822414 |
| Gm16861 100503704   | -1.214366268 | 0.07662164  | -1.214366268 | 0.07662164  |
| Pde3b 18576         | -1.214416509 | 0.271855951 | -1.422122968 | 0.158870438 |
| Taok3 330177        | -1.214451361 | 0.097377742 | -1.082740163 | 0.188077447 |
| Ikbke 56489         | -1.214524067 | 0.23652506  | -1.1780625   | 0.250243975 |
| Eif2b2 217715       | -1.214539053 | 0.070110166 | -1.214539053 | 0.070110166 |
| Nradd 67169         | -1.2145467   | 0.398291533 | -1.256171314 | 0.404473651 |
| Poli 26447          | -1.21460017  | 0.260759587 | -1.015390153 | 0.474842722 |
| Fbxl15 68431        | -1.214671668 | 0.253268906 | 1.09405178   | 0.356937718 |
| Cd1d1 12479         | -1.214728944 | 0.102290512 | -1.295066748 | 0.040952438 |
| Tmem19 67226        | -1.214741219 | 0.01100407  | -1.214741219 | 0.01100407  |

|                      |              |             |              |             |
|----------------------|--------------|-------------|--------------|-------------|
| Timeless 21853       | -1.21483876  | 0.22352654  | -1.057098461 | 0.410191178 |
| Lamb2 16779          | -1.214889441 | 0.157002467 | -1.115769993 | 0.284123071 |
| Stim1 20866          | -1.214921096 | 0.16006607  | 1.019036361  | 0.443836208 |
| Mettl17 52535        | -1.214954551 | 0.192897756 | 1.061722295  | 0.32919405  |
| Entpd5 12499         | -1.215058269 | 0.090830203 | -1.215058269 | 0.090830203 |
| Txlng 353170         | -1.215150818 | 0.276299971 | -1.380347631 | 0.190664693 |
| Rprd1b 70470         | -1.21518862  | 0.124453258 | -1.325165847 | 0.030255693 |
| Ep400 75560          | -1.215411029 | 0.184317722 | -1.137281215 | 0.206135639 |
| 2010107G23Rik 69894  | -1.215527444 | 0.295662852 | -1.215527444 | 0.295662852 |
| Acp2 11432           | -1.215581957 | 0.003880081 | -1.16590204  | 0.005489821 |
| Cyp1a2 13077         | -1.215640993 | 0.081539631 | -1.317980845 | 0.027474126 |
| Mrps30 59054         | -1.21566223  | 0.136225271 | -1.483318527 | 0.006627897 |
| Dera 232449          | -1.215889619 | 0.008204346 | -1.116289015 | 0.00980253  |
| Irf3 54131           | -1.216011889 | 0.043933748 | -1.130800613 | 0.077090482 |
| 1300017J02Rik 71775  | -1.216016237 | 0.027386853 | -1.348970845 | 0.000636484 |
| Rnpepl1 108657       | -1.216187214 | 0.011567771 | -1.276080497 | 0.000629623 |
| Coq9 67914           | -1.216237005 | 0.006984176 | -1.201398733 | 0.001709679 |
| 1100001G20Rik 66107  | -1.216424678 | 0.172322505 | -1.389031608 | 0.013536814 |
| Eci2 23986           | -1.2165022   | 0.040628476 | -1.297798415 | 0.003266945 |
| 1110021J02Rik 68597  | -1.2165059   | 0.227877187 | -1.102021738 | 0.330379779 |
| Zfp334 228876        | -1.216520972 | 0.343493297 | -2.259092194 | 0.029287641 |
| Cstf1 67337          | -1.216524314 | 0.096750567 | -1.414524805 | 0.004145206 |
| Cbx5 12419           | -1.216528347 | 0.113647992 | -1.028267448 | 0.39577872  |
| Rnf135 71956         | -1.216594024 | 0.09657677  | -1.30756431  | 0.013797404 |
| Zcchc11 230594       | -1.216621361 | 0.20536792  | -1.10535092  | 0.330532226 |
| Dhrs3 20148          | -1.216873916 | 0.098306161 | -1.21850132  | 0.025829645 |
| Dnmbp 71972          | -1.216949204 | 0.274643011 | 1.000203617  | 0.499739763 |
| Eefsec 65967         | -1.216965493 | 0.093270733 | -1.10960878  | 0.193368102 |
| Bola1 69168          | -1.216997515 | 0.147051708 | -1.216997515 | 0.147051708 |
| Ppp1r9b 217124       | -1.217304445 | 0.148979658 | -1.09021056  | 0.301870639 |
| Hdc 15186            | -1.217333938 | 0.221314723 | -1.017445636 | 0.466816345 |
| Tecpr2 104859        | -1.217366916 | 0.128888666 | -1.343535153 | 0.051227366 |
| Ddx18 66942          | -1.217579275 | 0.11915836  | -1.200450795 | 0.055293007 |
| Mllt1 64144          | -1.217591104 | 0.093671261 | -1.256750367 | 0.076341416 |
| Mkrn2 67027          | -1.217595565 | 0.217787728 | -1.031975216 | 0.442142969 |
| Il6ra 16194          | -1.217681282 | 0.30315848  | 1.108617468  | 0.370664978 |
| Prkag2 108099        | -1.217759467 | 0.15600458  | -1.34007732  | 0.046638575 |
| Pofut2 80294         | -1.217842514 | 0.06276877  | -1.217842514 | 0.06276877  |
| Zfp276 57247         | -1.217913216 | 0.089238939 | -1.280231712 | 0.048748493 |
| Usp19 71472          | -1.217966275 | 0.112585653 | -1.327420185 | 0.023147803 |
| Myh9 17886           | -1.218036357 | 0.097549609 | -1.101977991 | 0.202881516 |
| Pck2 74551           | -1.218179676 | 0.111872623 | -1.377251189 | 0.017843302 |
| Epb4.1 269587        | -1.218427686 | 0.211794524 | 1.093589896  | 0.269317404 |
| B630019K06Rik 102941 | -1.218644764 | 0.419490267 | -6.580133333 | 0.095073527 |
| Trappc1 245828       | -1.218693789 | 0.093465146 | -1.12878399  | 0.188703654 |
| Dock6 319899         | -1.218789621 | 0.080416184 | -1.050636522 | 0.289940027 |
| lqce 74239           | -1.218806222 | 0.261048071 | 1.11374154   | 0.33471909  |
| Med16 216154         | -1.21888457  | 0.01274458  | -1.116015194 | 0.033722574 |
| Nf1 18015            | -1.219105274 | 0.228552242 | -1.460261917 | 0.082621991 |
| Nmi 64685            | -1.219190262 | 0.149187539 | -1.010225256 | 0.471745909 |
| Fam83h 105732        | -1.219191527 | 0.043196782 | -1.219191527 | 0.043196782 |
| Zfyve21 68520        | -1.21919413  | 0.158696237 | -1.093953564 | 0.299719468 |
| Gpr4 319197          | -1.219463256 | 0.289271595 | -2.006499212 | 0.001835595 |

|                      |              |             |              |             |
|----------------------|--------------|-------------|--------------|-------------|
| Dgkz 104418          | -1.219469125 | 0.023175533 | -1.262399668 | 0.01593673  |
| 2810474019Rik 67246  | -1.219540816 | 0.077394479 | -1.39858245  | 0.006130199 |
| Ptges 64292          | -1.219668276 | 0.384879513 | -2.099930691 | 0.17960658  |
| Bcar3 29815          | -1.219783426 | 0.101470343 | -1.031677193 | 0.383220668 |
| Gga1 106039          | -1.219804684 | 0.004311434 | -1.219804684 | 0.004311434 |
| Fadd 14082           | -1.219867493 | 0.073924565 | -1.334205978 | 0.017169719 |
| Prrt1 260297         | -1.21989608  | 0.387191095 | -2.15097535  | 0.178555935 |
| Pdxdc1 94184         | -1.219993764 | 0.036854706 | -1.174317385 | 0.075056865 |
| Ube2q2 109161        | -1.219999547 | 0.166933602 | -1.219999547 | 0.166933602 |
| Cyp27a1 104086       | -1.220041474 | 0.062672854 | -1.230279067 | 0.019023305 |
| Ubr4 69116           | -1.220095406 | 0.016055469 | -1.254485303 | 0.00182893  |
| Lmo7 380928          | -1.220173738 | 0.243055206 | -1.183523132 | 0.21553436  |
| Acap1 216859         | -1.220181392 | 0.301838337 | -1.637522765 | 0.107525861 |
| Hist2h2aa1 15267     | -1.220200161 | 0.203985722 | -1.351600864 | 0.089718483 |
| Cutc 66388           | -1.220230122 | 0.128539243 | -1.384240137 | 0.028030292 |
| Acox3 80911          | -1.220388473 | 0.156595949 | -1.11470963  | 0.276770064 |
| Pyroxd2 74580        | -1.220390277 | 0.214680203 | -1.212216528 | 0.175996803 |
| Znrd1as 76416        | -1.220429785 | 0.114638078 | -1.305934167 | 0.069373807 |
| Pdlim2 213019        | -1.220831666 | 0.286619931 | -1.5405671   | 0.126581665 |
| Neur13 214854        | -1.220905304 | 0.122675549 | -1.350865526 | 0.044915644 |
| Gabpb2 213054        | -1.220962279 | 0.250095736 | 1.131899942  | 0.274551023 |
| Inadl 12695          | -1.221012688 | 0.244834243 | -1.332650987 | 0.088543402 |
| Arhgap17 70497       | -1.221268356 | 0.184273325 | -1.082639502 | 0.351375127 |
| Atxn7l2 72522        | -1.22128215  | 0.193377037 | -1.22128215  | 0.193377037 |
| Cyp2c37 13096        | -1.221334236 | 0.148253961 | -1.260285186 | 0.062107414 |
| Prelp 116847         | -1.221478805 | 0.074184501 | -1.415576999 | 0.003659502 |
| Syne2 319565         | -1.221755249 | 0.198295735 | -1.223885703 | 0.169553484 |
| Syk 20963            | -1.221761189 | 0.159698667 | -1.39497739  | 0.050593515 |
| Sbf2 319934          | -1.221768673 | 0.175701381 | -1.221768673 | 0.175701381 |
| Tor1aip1 208263      | -1.2219039   | 0.120221502 | -1.110645272 | 0.244420039 |
| Tmem188 382030       | -1.222118468 | 0.22476367  | -1.364907434 | 0.104097114 |
| Midn 59090           | -1.222302487 | 0.113436062 | -1.245948806 | 0.026268787 |
| Sugp2 234373         | -1.222372882 | 0.182302239 | -1.510825672 | 0.011078741 |
| BC024479 235184      | -1.222427966 | 0.305200449 | -1.316385067 | 0.221736797 |
| Stox2 71069          | -1.222851561 | 0.361497103 | -1.222851561 | 0.361497103 |
| Smad2 17126          | -1.222874488 | 0.12309947  | -1.222874488 | 0.12309947  |
| Pygl 110095          | -1.223139344 | 0.051636384 | -1.064251696 | 0.186943411 |
| Tmem106c 380967      | -1.223181032 | 0.181717839 | -1.507163671 | 0.012793293 |
| Chst11 58250         | -1.223206359 | 0.350994719 | -2.656775654 | 0.009368805 |
| Stard10 56018        | -1.223332681 | 0.149146597 | -1.179534963 | 0.163270334 |
| Cd36 12491           | -1.223386422 | 0.141662669 | -1.087422654 | 0.296349902 |
| Dguok 27369          | -1.223525491 | 0.135665433 | 1.008420789  | 0.470035388 |
| Clpb 20480           | -1.223955038 | 0.057806117 | -1.163180851 | 0.112136973 |
| Zfp777 72306         | -1.224004802 | 0.067694049 | -1.321960003 | 0.022810555 |
| 2310061I04Rik 69662  | -1.224233206 | 0.005557349 | -1.19099655  | 0.012257325 |
| 9430015G10Rik 230996 | -1.224299176 | 0.142034061 | -1.093897089 | 0.281476556 |
| Slc13a2 20500        | -1.224354742 | 0.265191272 | -1.408954092 | 0.08534996  |
| Ccdc91 67015         | -1.224446009 | 0.177877423 | -1.224446009 | 0.177877423 |
| Qprt 67375           | -1.224454232 | 0.021277975 | -1.182590736 | 0.04479508  |
| Ncoa7 211329         | -1.224628607 | 0.404983886 | 1.707719016  | 0.288410395 |
| Evi2a 14017          | -1.224667681 | 0.293501811 | -1.224667681 | 0.293501811 |
| Ppp1r26 241289       | -1.224866667 | 0.433068168 | 1            | #DIV/0!     |
| Smad3 17127          | -1.224871152 | 0.161540358 | -1.083541494 | 0.32774823  |

|                      |              |             |              |             |
|----------------------|--------------|-------------|--------------|-------------|
| Ccbl1 70266          | -1.224918545 | 0.035877413 | -1.217857173 | 0.015698764 |
| Wdr93 626359         | -1.22492331  | 0.302150715 | -1.854794213 | 0.040140729 |
| Rnf216 108086        | -1.224925045 | 0.151944305 | 1.017766674  | 0.425914903 |
| Mvd 192156           | -1.225013012 | 0.263605135 | -1.482336773 | 0.127384144 |
| Sifn8 276950         | -1.225099274 | 0.380032667 | -3.972802444 | 0.00311299  |
| Dhrs13 70451         | -1.225163614 | 0.178704403 | -1.607348621 | 0.001384208 |
| Hsd17b2 15486        | -1.225218086 | 0.002300702 | -1.191340601 | 0.005165222 |
| Gtf3c6 67371         | -1.225263005 | 0.148851559 | -1.356533158 | 0.035463955 |
| Etv3 27049           | -1.225295158 | 0.327012139 | -1.24189808  | 0.281039705 |
| Pard3 93742          | -1.225304283 | 0.027070483 | -1.165488885 | 0.056529234 |
| Slc35e2 320541       | -1.225370427 | 0.187704336 | 1.055422498  | 0.363403772 |
| H2-Ke6 14979         | -1.225421633 | 0.111890979 | -1.369804917 | 0.029284457 |
| N4bp1 80750          | -1.225444825 | 0.053791933 | -1.287918875 | 0.032525974 |
| Piga 18700           | -1.225515784 | 0.31319329  | 1.111122148  | 0.388279679 |
| 1110008F13Rik 67388  | -1.225667967 | 0.046919598 | -1.323337783 | 0.001531381 |
| Gca 227960           | -1.225681217 | 0.347940711 | 1.440670469  | 0.07828063  |
| Wdr59 319481         | -1.225903998 | 0.13572511  | -1.225903998 | 0.13572511  |
| Mrpl35 66223         | -1.225922568 | 0.056814898 | -1.061416628 | 0.213973107 |
| Beta-s 100503605     | -1.225924622 | 0.292859308 | -1.225924622 | 0.292859308 |
| Blk 12143            | -1.225926987 | 0.414148685 | 3.216934969  | 0.094488886 |
| Trib3 228775         | -1.226057381 | 0.236269824 | -1.565437781 | 0.045324374 |
| Sh3bgr 50795         | -1.226166243 | 0.427473343 | -4.58098     | 0.070596339 |
| Setd1a 233904        | -1.226221041 | 0.188142065 | -1.221729916 | 0.166386223 |
| Stk24 223255         | -1.226249196 | 0.227603601 | -1.030080102 | 0.451093582 |
| Crym 12971           | -1.226330137 | 0.379489652 | -3.34685095  | 0.02323403  |
| Adap1 231821         | -1.2263943   | 0.347002706 | -2.839175958 | 0.000727097 |
| 2200002D01Rik 72275  | -1.226416029 | 0.204621545 | -1.034731428 | 0.432613312 |
| Adipor2 68465        | -1.2264757   | 0.036385936 | -1.150486711 | 0.068894934 |
| Fam193a 231128       | -1.22655835  | 0.154521871 | -1.348435303 | 0.050681228 |
| Emilin1 100952       | -1.22658244  | 0.071185228 | -1.419353553 | 0.002920361 |
| Fubp3 320267         | -1.226674852 | 0.268573206 | -1.065625575 | 0.38854002  |
| Gata2 14461          | -1.226776828 | 0.272540474 | -1.074771835 | 0.38114776  |
| Sec23b 27054         | -1.226858048 | 0.179244513 | -1.226858048 | 0.179244513 |
| Tcof1 21453          | -1.226913704 | 0.073312899 | -1.12466512  | 0.15010731  |
| Pik3c2b 240752       | -1.226937277 | 0.094716149 | -1.299200453 | 0.046505235 |
| Bckdk 12041          | -1.226944568 | 0.190242324 | -1.534530579 | 0.01286921  |
| Apoe 11816           | -1.226975618 | 0.187828948 | -1.432347021 | 0.062800419 |
| Irak1 16179          | -1.227015829 | 0.114412154 | -1.102942382 | 0.240005178 |
| Als2cr4 381259       | -1.227089708 | 0.256063515 | -1.489669122 | 0.115360279 |
| Gm15760 100042948    | -1.22723382  | 0.272934537 | -1.22723382  | 0.272934537 |
| Taf5l 102162         | -1.227297415 | 0.138821236 | -1.227297415 | 0.138821236 |
| N6amt2 68043         | -1.227318455 | 0.297982744 | -1.227318455 | 0.297982744 |
| Zkscan14 67235       | -1.227348399 | 0.20563074  | -1.41474716  | 0.095073605 |
| Pdilt 71830          | -1.227420426 | 0.108897582 | -1.309675594 | 0.025946763 |
| Tmppe 100504715      | -1.227429181 | 0.174308784 | -1.227429181 | 0.174308784 |
| Mag 17136            | -1.227592811 | 0.380506968 | -1.227592811 | 0.380506968 |
| Nfic 18029           | -1.22768007  | 0.069955385 | -1.218548234 | 0.003519932 |
| F11 109821           | -1.227729505 | 0.129804002 | -1.227729505 | 0.129804002 |
| Nktr 18087           | -1.227764996 | 0.24884636  | -1.220578895 | 0.284726212 |
| Galnt1 14423         | -1.227785094 | 0.001861149 | -1.26425066  | 0.000400677 |
| 2810047C21Rik1 72716 | -1.227792455 | 0.4209036   | -1.08282     | 0.173296754 |
| Clock 12753          | -1.227895488 | 0.30891272  | 1.21918599   | 0.114931781 |
| Me2 107029           | -1.228000342 | 0.306236315 | -1.573100557 | 0.155445584 |

|                      |              |             |              |             |
|----------------------|--------------|-------------|--------------|-------------|
| Nav2 78286           | -1.228152215 | 0.113979523 | -1.087845283 | 0.242155379 |
| Wdr62 233064         | -1.228184772 | 0.276790487 | -1.683470047 | 0.055854192 |
| Prox1 19130          | -1.22823914  | 0.295670678 | -1.042744305 | 0.428476614 |
| Eya3 14050           | -1.228244912 | 0.052210196 | -1.228244912 | 0.052210196 |
| B330016D10Rik 320456 | -1.228311139 | 0.267257657 | -1.228311139 | 0.267257657 |
| Aldh2 11669          | -1.228386962 | 0.053896184 | -1.192084478 | 0.00091429  |
| Tmem8b 242409        | -1.228388681 | 0.199672671 | -1.228388681 | 0.199672671 |
| Rgs16 19734          | -1.228433818 | 0.261305289 | -1.009148892 | 0.487933492 |
| 4930523C07Rik 67647  | -1.228484351 | 0.143514135 | -1.311246832 | 0.022993528 |
| Stard13 243362       | -1.228612426 | 0.249466648 | 1.06716432   | 0.352366241 |
| Lrrc59 98238         | -1.22862008  | 0.030777199 | -1.147083212 | 0.058348273 |
| Gcnt2 14538          | -1.228630199 | 0.18940503  | -1.049057004 | 0.400804745 |
| Dusp16 70686         | -1.228674804 | 0.169695372 | -1.151566487 | 0.259416664 |
| Hmg20b 15353         | -1.228681112 | 0.104520068 | -1.228681112 | 0.104520068 |
| Slc5a6 330064        | -1.228691438 | 0.182362883 | -1.439568524 | 0.05480554  |
| Col18a1 12822        | -1.228699508 | 0.004848466 | -1.269159114 | 0.001321103 |
| Specc1 432572        | -1.228703739 | 0.234034214 | -1.479681788 | 0.092752752 |
| Adamts1 77739        | -1.228851305 | 0.404306894 | -4.537055556 | 0.078490172 |
| Gsdmd 69146          | -1.228859179 | 0.017587278 | -1.17067947  | 0.036409867 |
| Rfx5 53970           | -1.22889611  | 0.319162982 | -1.22889611  | 0.319162982 |
| Sh3glb2 227700       | -1.22903067  | 0.074968647 | -1.239222902 | 0.034916819 |
| Isoc2b 67441         | -1.229054675 | 0.123958515 | -1.170954617 | 0.141284246 |
| L2hgdh 217666        | -1.229112254 | 0.212189595 | -1.363375199 | 0.139193226 |
| Zfp385a 29813        | -1.229234396 | 0.115895453 | -1.229234396 | 0.115895453 |
| Upf2 326622          | -1.229468595 | 0.214580179 | -1.089098461 | 0.360494642 |
| Ambp 11699           | -1.229516161 | 0.097551973 | -1.311797622 | 0.058971357 |
| Lgals3bp 19039       | -1.229544222 | 0.008270465 | -1.339747881 | 0.000134051 |
| Ppox 19044           | -1.229591817 | 0.154334448 | -1.057415012 | 0.34628906  |
| B230208H17Rik 227624 | -1.229709045 | 0.048341105 | -1.308479518 | 0.020411228 |
| Zbtb8a 73680         | -1.229935353 | 0.151053895 | -1.229935353 | 0.151053895 |
| Twsg1 65960          | -1.230069558 | 0.242645353 | -1.230069558 | 0.242645353 |
| Gsk3b 56637          | -1.230088363 | 0.249490551 | 1.013108762  | 0.468307955 |
| Pik3cg 30955         | -1.230120243 | 0.362168543 | 1.178060395  | 0.396752683 |
| B3galt4 54218        | -1.230227668 | 0.305301696 | 1.061564844  | 0.438569312 |
| Zfp148 22661         | -1.230322275 | 0.165097801 | -1.135529645 | 0.270432959 |
| Epha4 13838          | -1.230366683 | 0.377641563 | 1.318577386  | 0.348231523 |
| Rfx4 71137           | -1.230409066 | 0.324272556 | 1.110261349  | 0.405051306 |
| Tmx4 52837           | -1.230456117 | 0.283631384 | -1.329091184 | 0.190335722 |
| Olfml1 244198        | -1.230498606 | 0.173771175 | 1.038372299  | 0.401776435 |
| Rptor 74370          | -1.230525389 | 0.084412446 | -1.116594047 | 0.173701805 |
| Nudt7 67528          | -1.230624657 | 0.04309955  | -1.167351487 | 0.088547933 |
| Ebag9 55960          | -1.230624984 | 0.118138192 | -1.334796335 | 0.037530283 |
| Galt 14430           | -1.230739371 | 0.07753969  | -1.115287041 | 0.152354287 |
| Rg9mtd3 69934        | -1.230895722 | 0.265219565 | -1.230895722 | 0.265219565 |
| Slc19a2 116914       | -1.230947755 | 0.23322913  | -1.040314461 | 0.440838506 |
| Prps2 110639         | -1.23097527  | 0.212498978 | -1.446220642 | 0.088451143 |
| Zfp780b 338354       | -1.230999586 | 0.227446024 | -1.495472884 | 0.078359819 |
| Hivep1 110521        | -1.231020238 | 0.248669543 | 1.129456463  | 0.298392806 |
| 3110062M04Rik 78412  | -1.231442035 | 0.2882876   | -1.32988524  | 0.211689951 |
| Abcg2 26357          | -1.231544592 | 0.246519798 | -1.281757195 | 0.16542273  |
| lyd 70337            | -1.231560558 | 0.072914876 | -1.231560558 | 0.072914876 |
| Gnai3 14679          | -1.231565271 | 0.26322752  | -1.076132361 | 0.397900682 |
| Olig1 50914          | -1.231642438 | 0.337986132 | -1.189259879 | 0.367199444 |

|                      |              |             |              |             |
|----------------------|--------------|-------------|--------------|-------------|
| Plekha4 69217        | -1.231661499 | 0.373539609 | 1.586432029  | 0.185997352 |
| Prr12 233210         | -1.231693704 | 0.030409953 | -1.231693704 | 0.030409953 |
| Tnks1bp1 228140      | -1.23190513  | 0.014293532 | -1.297084411 | 0.001061267 |
| Itgb3bp 67733        | -1.231979683 | 0.407398993 | 1.282144901  | 0.403677687 |
| Prkdc 19090          | -1.232068761 | 0.244108271 | 1.159484452  | 0.211683066 |
| Galm 319625          | -1.232069185 | 0.000888012 | -1.155623922 | 0.000168982 |
| Trp53i13 216964      | -1.232147951 | 0.212906632 | -1.172739812 | 0.248854487 |
| Rab8a 17274          | -1.23217037  | 0.003515009 | -1.249795779 | 0.004532928 |
| Gmfg 63986           | -1.232170541 | 0.258141182 | -1.884073956 | 0.005352505 |
| Dmtf1 23857          | -1.232235717 | 0.097442933 | -1.323678307 | 0.025267772 |
| Cyb5r1 230582        | -1.232370465 | 0.137130216 | -1.175516719 | 0.158633765 |
| Slc38a1 105727       | -1.232560776 | 0.229922142 | -1.425267824 | 0.125094982 |
| Slc16a13 69309       | -1.232714147 | 0.227747409 | -1.585605941 | 0.03524665  |
| Magi3 99470          | -1.232733441 | 0.302309297 | 1.322902887  | 0.142241819 |
| Slc16a5 217316       | -1.23275569  | 0.006006008 | -1.335037099 | 0.000163371 |
| Ift27 67042          | -1.232759943 | 0.294230708 | 1.294101001  | 0.052635624 |
| Idh1 15926           | -1.232866364 | 0.064793208 | -1.133486141 | 0.129002809 |
| Dnajc13 235567       | -1.232868733 | 0.079600571 | -1.130441149 | 0.163394821 |
| Nxt2 237082          | -1.232927218 | 0.246876255 | -1.201761141 | 0.227119975 |
| 4930429B21Rik 67576  | -1.232990753 | 0.409410548 | -2.76078     | 0.173296754 |
| 4930578N16Rik 75051  | -1.232990753 | 0.409410548 | -2.76078     | 0.173296754 |
| 1700024P16Rik 242594 | -1.233214066 | 0.298941865 | -1.415044725 | 0.138435679 |
| Gigyf2 227331        | -1.233259453 | 0.187894441 | -1.034491434 | 0.422143615 |
| Map2k6 26399         | -1.233308973 | 0.26840616  | -1.807360969 | 0.02664825  |
| Pla2r1 18779         | -1.233319511 | 0.368616021 | -2.156249    | 0.141354078 |
| Sf3a1 67465          | -1.233524074 | 0.075337807 | -1.117114925 | 0.153373966 |
| Srsf4 57317          | -1.233587228 | 0.042962523 | -1.16043144  | 0.088255475 |
| Kcnn1 84036          | -1.233588296 | 0.111526043 | -1.363143104 | 0.041647344 |
| Pyhin1 236312        | -1.233686769 | 0.325082022 | 1.091711219  | 0.424141403 |
| Cited2 17684         | -1.233885271 | 0.215963579 | -1.288752819 | 0.156416898 |
| Capn5 12337          | -1.233916358 | 0.237069963 | -1.233916358 | 0.237069963 |
| Myst1 67773          | -1.233957751 | 0.116885723 | -1.31042036  | 0.064529452 |
| Tnip1 57783          | -1.234032672 | 0.089765155 | -1.342861055 | 0.036517085 |
| Dyrk1a 13548         | -1.234045933 | 0.131787987 | -1.36203267  | 0.060992174 |
| 2310015A10Rik 69548  | -1.234087674 | 0.240328602 | -1.106159198 | 0.363711256 |
| Cyp4v3 102294        | -1.234232425 | 0.073743538 | -1.250983204 | 0.036993172 |
| Txnrd3 232223        | -1.234246409 | 0.236344263 | -1.496246279 | 0.026983799 |
| Syde1 71709          | -1.234275575 | 0.134529969 | -1.234275575 | 0.134529969 |
| Psd3 234353          | -1.234315328 | 0.266630214 | 1.068589792  | 0.392600693 |
| Ppp1ca 19045         | -1.234315858 | 0.020256838 | -1.282904538 | 0.012774795 |
| Ap1g1 11765          | -1.23454036  | 0.169408181 | 1.036281068  | 0.404307486 |
| Ttc37 218343         | -1.234584024 | 0.070905273 | -1.237307747 | 0.028272343 |
| Zfhx3 11906          | -1.234739542 | 0.095558449 | -1.033681688 | 0.374885705 |
| Nat6 56441           | -1.234879395 | 0.060120019 | -1.130856574 | 0.113084569 |
| Ybx1 22608           | -1.234923243 | 0.007057006 | -1.253704671 | 0.001965477 |
| Laptm5 16792         | -1.235148349 | 0.047929481 | -1.281668837 | 0.00321758  |
| Tbc1d20 67231        | -1.235222979 | 0.222603699 | -1.077264054 | 0.381184704 |
| Sntb2 20650          | -1.235304633 | 0.283874925 | 1.223684853  | 0.2320602   |
| Mink1 50932          | -1.23537809  | 0.123886787 | -1.182699669 | 0.145343312 |
| Sall2 50524          | -1.235522558 | 0.301011423 | -1.235522558 | 0.301011423 |
| Snpc5 330959         | -1.235635274 | 0.093449459 | -1.235635274 | 0.093449459 |
| Gm8994 668137        | -1.235675617 | 0.26039119  | 1.182841442  | 0.226476493 |
| Emp3 13732           | -1.235696106 | 0.336173916 | -1.131276815 | 0.359715189 |



|                     |              |             |              |             |
|---------------------|--------------|-------------|--------------|-------------|
| Cnot10 78893        | -1.235797595 | 0.058731517 | -1.363812574 | 0.007952671 |
| Aldob 230163        | -1.235855884 | 0.145380403 | -1.235855884 | 0.145380404 |
| Trappc8 75964       | -1.236074844 | 0.309383289 | 1.346323377  | 0.146998955 |
| Paip2 67869         | -1.236115335 | 0.04628243  | -1.151693797 | 0.090923569 |
| Lmf1 76483          | -1.236229618 | 0.124036432 | -1.236229618 | 0.124036432 |
| Cap1 12331          | -1.236304055 | 0.036493121 | -1.320171455 | 0.011636249 |
| Dcxr 67880          | -1.236628237 | 0.069851038 | -1.348011017 | 0.021167871 |
| Itpr2 16439         | -1.236702204 | 0.076552752 | -1.062580934 | 0.289453457 |
| Agxt2 268782        | -1.236805375 | 0.187038556 | -1.070849084 | 0.373710029 |
| Adamts5 66548       | -1.23680843  | 0.294314628 | -1.23680843  | 0.294314628 |
| Msn 17698           | -1.236826727 | 0.268090524 | 1.000912688  | 0.498869518 |
| Pde7b 29863         | -1.237066394 | 0.368708421 | -1.548979625 | 0.242155324 |
| Myo18a 360013       | -1.237083025 | 0.023473418 | -1.391312484 | 0.00026879  |
| Hyal3 109685        | -1.237336321 | 0.379340985 | 1.230602636  | 0.395387796 |
| Tmem63b 224807      | -1.237386313 | 0.008017329 | -1.233389695 | 0.000709022 |
| Zfp526 210172       | -1.237408176 | 0.171039008 | -1.133419381 | 0.293374088 |
| Lrp11 237253        | -1.237424164 | 0.333604971 | -1.237424164 | 0.333604971 |
| Hist1h4c 319155     | -1.237431459 | 0.400922831 | 1            | #DIV/0!     |
| Hist1h4j 319159     | -1.237431459 | 0.400922831 | 1            | #DIV/0!     |
| Coq2 71883          | -1.237488479 | 0.098349513 | -1.404340732 | 0.014363421 |
| Wasf2 242687        | -1.237541953 | 0.221260331 | 1.098349942  | 0.280548761 |
| Tlr5 53791          | -1.237542507 | 0.338306476 | -1.705426404 | 0.167446261 |
| Heatr7a 223658      | -1.237649348 | 0.090485586 | -1.128815747 | 0.18662626  |
| Stk16 20872         | -1.237656364 | 0.086163804 | -1.10731633  | 0.168369245 |
| Fbxw8 231672        | -1.237940405 | 0.01479329  | -1.176377983 | 0.029757516 |
| Ppil4 67418         | -1.237990356 | 0.123605926 | -1.399078402 | 0.035221789 |
| Rps6kb2 58988       | -1.238074547 | 0.086108073 | -1.155005895 | 0.169709058 |
| Pfkfb2 18640        | -1.23808583  | 0.322583973 | -1.044624193 | 0.440413763 |
| Ccl5 20304          | -1.238106804 | 0.231472639 | -1.433283017 | 0.070091878 |
| Ift88 21821         | -1.238148451 | 0.239159914 | -1.242052544 | 0.203704165 |
| Ugt1a2 22236        | -1.238229607 | 0.279529383 | -1.0414596   | 0.42639597  |
| Stxbp4 20913        | -1.238235718 | 0.282278968 | -2.009497975 | 0.004463408 |
| Dnm2 13430          | -1.238365457 | 0.005440931 | -1.29964043  | 0.001002626 |
| Gmcl1 23885         | -1.238438666 | 0.243012215 | -1.14969036  | 0.329893223 |
| Wdr36 225348        | -1.238444393 | 0.143058034 | -1.141846039 | 0.245638351 |
| Pusl1 433813        | -1.238701782 | 0.165312131 | -1.238701782 | 0.165312131 |
| Tcirg1 27060        | -1.238704502 | 0.018088776 | -1.238704502 | 0.018088776 |
| Izumo4 71564        | -1.238737879 | 0.221838052 | -1.499150494 | 0.080156681 |
| Tmem128 66309       | -1.238738329 | 0.045932871 | -1.238738329 | 0.045932871 |
| Oxsm 71147          | -1.238794502 | 0.144660588 | -1.267209583 | 0.096956141 |
| Gm3219 100041231    | -1.238846032 | 0.229389565 | -1.164384946 | 0.202916625 |
| Med1 19014          | -1.238950714 | 0.156664149 | -1.256773042 | 0.098334876 |
| Rqcd1 58184         | -1.239004677 | 0.098543128 | -1.157618704 | 0.187282299 |
| Pcdhgc3 93706       | -1.239087672 | 0.364708619 | 1.358855336  | 0.302417671 |
| Mfsd6 98682         | -1.239253323 | 0.294639124 | -1.614673615 | 0.133414628 |
| Pla2g6 53357        | -1.239256701 | 0.166368234 | -1.236373763 | 0.116365355 |
| Habp2 226243        | -1.239285621 | 0.031915124 | -1.337005947 | 0.005509696 |
| Zdhhc8 27801        | -1.239342712 | 0.008683106 | -1.296159347 | 0.003016463 |
| 1810048J11Rik 67708 | -1.239382106 | 0.259477788 | -1.548280291 | 0.107326784 |
| Neu1 18010          | -1.239417683 | 0.001843632 | -1.217846954 | 0.004732295 |
| B4galt7 218271      | -1.239424196 | 0.103206437 | -1.192234995 | 0.057559599 |
| Epn1 13854          | -1.239425861 | 0.129920352 | -1.239425861 | 0.129920352 |
| Ell 13716           | -1.239484416 | 0.122362202 | -1.093567211 | 0.261711455 |

|                     |              |             |              |             |
|---------------------|--------------|-------------|--------------|-------------|
| Parp2 11546         | -1.239515238 | 0.206637844 | -1.239515238 | 0.206637844 |
| Pdlim7 67399        | -1.239588499 | 0.188006664 | -1.507828956 | 0.037540369 |
| Gpr114 382045       | -1.239685012 | 0.36444659  | 1.42769032   | 0.258414798 |
| Zc3h18 76014        | -1.239717644 | 0.080622276 | -1.150333903 | 0.162870489 |
| Siglece 83382       | -1.239756248 | 0.278084789 | -1.598881667 | 0.022553885 |
| Cpne2 234577        | -1.23989071  | 0.14452816  | -1.461282178 | 0.022131317 |
| Bckdha 12039        | -1.239940543 | 0.045531566 | -1.378793958 | 0.003925296 |
| Plbd1 66857         | -1.240048261 | 0.170314106 | -1.240048261 | 0.170314106 |
| Bgn 12111           | -1.240138899 | 0.080476101 | -1.37090349  | 0.020110368 |
| Sh2b3 16923         | -1.240192501 | 0.126337933 | -1.103843047 | 0.264406083 |
| Hn1 15374           | -1.240250937 | 0.182577005 | -1.303699446 | 0.145764654 |
| Camk2n1 66259       | -1.240265409 | 0.093829621 | -1.407230517 | 0.01281191  |
| Rab10 19325         | -1.240463904 | 0.142548599 | -1.378946201 | 0.06746274  |
| Ttc9c 70387         | -1.240483076 | 0.186764048 | -1.008389141 | 0.473975532 |
| Tbc1d1 57915        | -1.240569579 | 0.263091328 | -1.082869596 | 0.4128573   |
| Parp12 243771       | -1.240620805 | 0.122343537 | -1.015867535 | 0.451429573 |
| Cpeb1 12877         | -1.240768618 | 0.403386724 | 2.034446561  | 0.230763487 |
| Dap 223453          | -1.240862029 | 0.003277154 | -1.204539214 | 0.007552201 |
| Pde4dip 83679       | -1.240982636 | 0.140372604 | 1.018886282  | 0.426702093 |
| Zfp946 74149        | -1.241048826 | 0.21756221  | -1.347353928 | 0.142801557 |
| Scaf1 233208        | -1.241107888 | 0.002226979 | -1.241107888 | 0.002226979 |
| Acsl5 433256        | -1.241178252 | 0.018078661 | -1.262046085 | 0.002077577 |
| BC064078 408064     | -1.241206809 | 0.406475112 | -2.8         | 0.173296754 |
| Mgl2 216864         | -1.241206809 | 0.406475112 | -2.8         | 0.173296754 |
| Gbp5 229898         | -1.241206809 | 0.406475112 | -2.8         | 0.173296754 |
| Trmt5 76357         | -1.241229117 | 0.286884774 | -1.241229117 | 0.286884774 |
| Pds5a 71521         | -1.241268968 | 0.24171185  | -1.245222018 | 0.188974949 |
| Ccdc109a 215999     | -1.241329047 | 0.337875743 | -2.197578242 | 0.058438409 |
| Preli1 66494        | -1.241338161 | 0.023343452 | -1.271789296 | 0.001598047 |
| Aplf 72103          | -1.241518746 | 0.322241537 | -1.484426795 | 0.175661402 |
| Ppard 19015         | -1.241530785 | 0.025632366 | -1.162150337 | 0.022526175 |
| Cfdp1 23837         | -1.241541183 | 0.068428248 | -1.241541183 | 0.068428248 |
| C1qtnf2 69183       | -1.241552896 | 0.345498322 | -1.964746675 | 0.131301799 |
| Nrap 18175          | -1.241808287 | 0.309413638 | -1.464879894 | 0.130455137 |
| Rasa1 218397        | -1.241875682 | 0.182961421 | -1.078014981 | 0.35062697  |
| Ccdc90a 76137       | -1.241941835 | 0.118947547 | -1.030129468 | 0.414884445 |
| Map3k14 53859       | -1.242276011 | 0.259064567 | -1.053008681 | 0.439904938 |
| Pnrc2 52830         | -1.242325789 | 0.174135942 | -1.242325789 | 0.174135942 |
| Nck2 17974          | -1.24246534  | 0.253067037 | -1.023544422 | 0.469997565 |
| Ccnh 66671          | -1.242499732 | 0.177431461 | -1.46069046  | 0.055379822 |
| 4933411K20Rik 66756 | -1.242660707 | 0.204689872 | 1.104621467  | 0.253362382 |
| Ang 11727           | -1.242676978 | 0.127485526 | -1.511881811 | 0.007111402 |
| Atp5s 68055         | -1.242827942 | 0.264248438 | -1.363190802 | 0.187424873 |
| Hmbs 15288          | -1.242829687 | 0.065017226 | -1.242829687 | 0.065017226 |
| Tctn2 67978         | -1.242879437 | 0.285668435 | -1.242879437 | 0.285668435 |
| Dnajc4 57431        | -1.242917531 | 0.147299415 | -1.242917531 | 0.147299415 |
| Pcsk6 18553         | -1.242945281 | 0.052889706 | -1.242945281 | 0.052889706 |
| Nup107 103468       | -1.242991582 | 0.289952817 | -1.658731751 | 0.093869103 |
| Mrpl39 27393        | -1.242993656 | 0.017495931 | -1.139002641 | 0.056419554 |
| Psme1 19186         | -1.243059532 | 0.143630858 | -1.256328425 | 0.082621815 |
| Sbk1 104175         | -1.243246014 | 0.147967047 | 1.029231811  | 0.398857923 |
| Bhlha15 17341       | -1.243381278 | 0.405985266 | -2.76078     | 0.173296754 |
| ltpk1 217837        | -1.243464723 | 0.007932311 | -1.138160253 | 0.010496245 |

|                     |              |             |              |             |
|---------------------|--------------|-------------|--------------|-------------|
| Hsd17b6 27400       | -1.243476099 | 0.182949427 | -1.398770691 | 0.100006627 |
| Kdm1b 218214        | -1.243633999 | 0.36525879  | 1.950250532  | 0.01965004  |
| Armc1 74252         | -1.243857576 | 0.003623733 | -1.243857576 | 0.003623733 |
| Prkab1 19079        | -1.243901588 | 0.00937004  | -1.356993649 | 0.000196571 |
| Inhbc 16325         | -1.243913283 | 0.087368297 | -1.505526578 | 0.001209814 |
| Rexo4 227656        | -1.243963381 | 0.066160276 | -1.200998958 | 0.018517086 |
| Pxn 19303           | -1.244005626 | 0.055589792 | -1.186977886 | 0.108640138 |
| Hibadh 58875        | -1.244121367 | 0.034688598 | -1.324283434 | 0.013056885 |
| Mfap4 76293         | -1.244151422 | 0.283213273 | -1.598422312 | 0.127834244 |
| Cpt2 12896          | -1.244167132 | 0.001107035 | -1.222248706 | 0.002829027 |
| Ptpn13 19249        | -1.244190322 | 0.298757075 | -1.244190322 | 0.298757075 |
| Dmap1 66233         | -1.244362238 | 0.064634558 | -1.394952573 | 0.00580463  |
| Lass2 76893         | -1.244370867 | 0.002407478 | -1.235890871 | 0.000341166 |
| Sall1 58198         | -1.244389745 | 0.203021984 | -1.244389745 | 0.203021984 |
| Lgr5 14160          | -1.244418753 | 0.324754909 | -1.445849723 | 0.204866197 |
| Upb1 103149         | -1.24445721  | 0.002289704 | -1.197198763 | 0.002360796 |
| Zc3h12d 237256      | -1.244466828 | 0.208666159 | -1.422294356 | 0.087174688 |
| Map2k4 26398        | -1.244473087 | 0.213797728 | 1.064287845  | 0.38664499  |
| Ppm1l 242083        | -1.244571325 | 0.131824229 | -1.08327704  | 0.280104744 |
| Akr1c12 622402      | -1.244763047 | 0.052967515 | -1.35622334  | 0.012694397 |
| Kctd21 622320       | -1.244989539 | 0.156358131 | -1.406373742 | 0.026149361 |
| Tfip11 54723        | -1.245033824 | 0.021772429 | -1.389142608 | 0.000898288 |
| Zbtb49 75079        | -1.245086557 | 0.222170186 | -1.040423252 | 0.428719804 |
| Rspo3 72780         | -1.245116254 | 0.248792195 | 1.009498011  | 0.486109431 |
| Klhl13 67455        | -1.245165307 | 0.333713391 | -1.768942156 | 0.161409843 |
| Zfp944 319615       | -1.245358802 | 0.242314513 | -1.857806429 | 0.008597623 |
| Rsph9 75564         | -1.245438434 | 0.40497268  | -2.8202      | 0.173296754 |
| Zfyve9 230597       | -1.245542305 | 0.191980868 | -1.080359456 | 0.357362028 |
| Cyp2d22 56448       | -1.24556855  | 0.014171407 | -1.318866339 | 0.000589429 |
| Secisbp2 75420      | -1.245607425 | 0.118458328 | -1.141503803 | 0.229083965 |
| Mterfd2 69821       | -1.245742056 | 0.086885836 | -1.224181718 | 0.043689917 |
| Abcb8 74610         | -1.245840107 | 0.021679489 | -1.193010005 | 0.045528861 |
| B230219D22Rik 78521 | -1.245996442 | 0.355533551 | 1.127888835  | 0.361440648 |
| Med12 59024         | -1.246048321 | 0.013913302 | -1.130713455 | 0.027270574 |
| Als2 74018          | -1.246101106 | 0.011687106 | -1.186616216 | 0.019884254 |
| Fam78a 241303       | -1.246107568 | 0.232619658 | -1.08341517  | 0.396955508 |
| Stx1b 56216         | -1.246217509 | 0.365272158 | -1.713821207 | 0.204246189 |
| Polg 18975          | -1.246381726 | 0.075881338 | -1.246381726 | 0.075881338 |
| Noc4l 100608        | -1.246568042 | 0.052042877 | -1.147250729 | 0.105289003 |
| Pdlim5 56376        | -1.246604288 | 0.289747109 | 1.297687839  | 0.112907731 |
| Cr1l 12946          | -1.246789931 | 0.059958053 | -1.144942553 | 0.118350054 |
| Nr1h3 22259         | -1.246888417 | 0.043732736 | -1.154059117 | 0.081050324 |
| Lrrc1 214345        | -1.246936683 | 0.371683001 | -1.246936683 | 0.371683001 |
| Vegfa 22339         | -1.24695973  | 0.130758842 | -1.34080284  | 0.088151495 |
| Irf5 27056          | -1.247069006 | 0.154243473 | 1.008915363  | 0.477747122 |
| Acbd5 74159         | -1.247098436 | 0.265290956 | -1.137335329 | 0.330734538 |
| Nit2 52633          | -1.247275903 | 0.033708794 | -1.161955317 | 0.059824599 |
| Fam177a 73385       | -1.247336846 | 0.193084801 | -1.205843392 | 0.123638566 |
| Pamr1 210622        | -1.247476281 | 0.126640786 | -1.089585848 | 0.267452607 |
| Osbp2 74309         | -1.247551784 | 0.249194645 | -1.803898599 | 0.024727516 |
| Phyhd1 227696       | -1.247562924 | 0.072483355 | -1.389273178 | 0.012993852 |
| Ftl1 14325          | -1.247606452 | 0.161288609 | -1.294589329 | 0.075628353 |
| Inhbe 16326         | -1.247610511 | 0.132127202 | -1.247610511 | 0.132127202 |

|                      |              |             |              |             |
|----------------------|--------------|-------------|--------------|-------------|
| Strbp 20744          | -1.247869646 | 0.150101161 | -1.110828672 | 0.29638285  |
| Gstz1 14874          | -1.247975454 | 0.000194952 | -1.274364093 | 7.19717E-05 |
| Fam193b 212483       | -1.248098415 | 0.061732141 | -1.248098415 | 0.061732141 |
| Ptgr1 67103          | -1.248103876 | 0.282285543 | -1.886161381 | 0.031848755 |
| Src 20779            | -1.248411916 | 0.068085712 | -1.072902029 | 0.247355827 |
| Snrnp200 320632      | -1.248474576 | 0.106427007 | -1.114770234 | 0.223153538 |
| Hps5 246694          | -1.248480568 | 0.197742429 | -1.248480568 | 0.197742429 |
| 2310068J16Rik 70281  | -1.248537997 | 0.401212986 | -1.555558606 | 0.363361927 |
| Fos 14281            | -1.248598274 | 0.257965717 | -1.494316702 | 0.011059258 |
| Cat 12359            | -1.24865314  | 0.04173515  | -1.343110253 | 0.013065862 |
| Lpp 210126           | -1.248688023 | 0.074125388 | -1.114417927 | 0.126289531 |
| Pdcd7 50996          | -1.248740274 | 0.221039419 | -1.572040376 | 0.055768317 |
| Rad52 19365          | -1.248843867 | 0.220571916 | -1.629354597 | 0.028336023 |
| 2410002F23Rik 668661 | -1.248868289 | 0.184815486 | -1.299254857 | 0.116135395 |
| Aldh4a1 212647       | -1.248907741 | 0.028404951 | -1.314785971 | 0.014476682 |
| Hsd11b1 15483        | -1.249039151 | 0.064159713 | -1.134217839 | 0.1207841   |
| Tmem106a 217203      | -1.249051177 | 0.101318001 | -1.402033469 | 0.027149779 |
| Pgrmc1 53328         | -1.249062915 | 0.102751445 | -1.226317028 | 0.083349859 |
| Wdr11 207425         | -1.249067727 | 0.116330304 | -1.127032999 | 0.227909529 |
| Slc38a10 72055       | -1.249142602 | 0.043962862 | -1.296792559 | 0.035664782 |
| Sar1b 66397          | -1.249296098 | 0.0104231   | -1.213517893 | 0.006077793 |
| AW112010 107350      | -1.249356958 | 0.075945741 | -1.318429811 | 0.039253339 |
| Mrpl46 67308         | -1.249540937 | 0.164881263 | -1.205463604 | 0.222173017 |
| Fibin 67606          | -1.249563636 | 0.414087512 | -5.7452      | 0.078237796 |
| B4galt1 14595        | -1.249670744 | 0.029878294 | -1.116044868 | 0.107132898 |
| Dnm3 103967          | -1.249786634 | 0.335524091 | -1.126641657 | 0.415701522 |
| Baz2b 407823         | -1.249813616 | 0.305868175 | -1.309789728 | 0.262637496 |
| Cpsf1 94230          | -1.249841954 | 0.018805496 | -1.206151324 | 0.002763202 |
| Slc11a1 18173        | -1.250225862 | 0.090281829 | -1.277634294 | 0.050099371 |
| Aldh6a1 104776       | -1.250270976 | 0.141731664 | -1.155523351 | 0.238373931 |
| B4galt6 56386        | -1.25037815  | 0.186230034 | -1.229521022 | 0.074698993 |
| Pkd2l2 53871         | -1.250547371 | 0.352541338 | -1.250547371 | 0.352541338 |
| Ppp1r7 66385         | -1.250552948 | 0.049284689 | -1.158863928 | 0.100764664 |
| Tspan17 74257        | -1.250658884 | 0.202239789 | -1.083374935 | 0.37750056  |
| Cxx1a 66158          | -1.250706218 | 0.061120364 | -1.231926438 | 0.046488202 |
| MyI9 98932           | -1.250890802 | 0.366242534 | 1.1662312    | 0.348543862 |
| Dcbld1 66686         | -1.250904962 | 0.205105165 | -1.460368832 | 0.097103173 |
| Ifitm2 80876         | -1.251093861 | 0.086311298 | -1.21018055  | 0.06831173  |
| Rock1 19877          | -1.251228751 | 0.201323717 | -1.173320276 | 0.228114243 |
| 2310047M10Rik 71923  | -1.251269285 | 0.118062578 | -1.120017361 | 0.235615103 |
| Hrct1 100039781      | -1.251271519 | 0.270803035 | -1.251271519 | 0.270803035 |
| Fam20c 80752         | -1.25131196  | 0.00679253  | -1.307573371 | 0.00079541  |
| Cml1 66116           | -1.251356072 | 0.201274796 | -1.798072241 | 0.000935398 |
| Pomc 18976           | -1.251374587 | 0.344281191 | 1.1044618    | 0.4341432   |
| Mlf1ip 71876         | -1.251428714 | 0.393034783 | 1            | #DIV/0!     |
| Dnajc2 22791         | -1.251481309 | 0.116614738 | -1.098150245 | 0.248744866 |
| Hist1h4a 326619      | -1.251498342 | 0.394960838 | -1.0353      | 0.173296754 |
| Hist1h4k 319160      | -1.251498342 | 0.394960838 | -1.0353      | 0.173296754 |
| Cacybp 12301         | -1.251535712 | 0.06668855  | -1.354401248 | 0.01038859  |
| Mup6 620807          | -1.251591997 | 0.370335334 | -2.327468391 | 0.146043794 |
| Mr1 15064            | -1.251592495 | 0.300097469 | -1.559744779 | 0.179748894 |
| Ccnd1 12443          | -1.251644248 | 0.174943386 | -1.088639536 | 0.347621107 |
| Snx14 244962         | -1.251747399 | 0.217852901 | -1.051803686 | 0.423817373 |

|                      |              |             |              |             |
|----------------------|--------------|-------------|--------------|-------------|
| 2810405K02Rik 66469  | -1.251815386 | 0.202261213 | -1.251815386 | 0.202261213 |
| Pon3 269823          | -1.251831101 | 0.071999679 | -1.139934902 | 0.147309001 |
| Gapdh 14433          | -1.251942371 | 0.091501984 | -1.315087282 | 0.071868139 |
| Solh 50817           | -1.252140583 | 0.137670849 | -1.252140583 | 0.137670849 |
| Zfp58 238693         | -1.252193875 | 0.270391818 | -1.252193875 | 0.270391818 |
| A230050P20Rik 319278 | -1.252227967 | 0.046726321 | -1.45069473  | 0.000982268 |
| Ptk2 14083           | -1.25228452  | 0.090919884 | -1.036796277 | 0.363959445 |
| Nckap5 210356        | -1.252303122 | 0.368399993 | 1.369889374  | 0.321727643 |
| Stx7 53331           | -1.252339346 | 0.218657872 | -1.042167474 | 0.436100817 |
| Vcpip1 70675         | -1.252349782 | 0.250025798 | 1.061222874  | 0.39168966  |
| Tnfrsf11b 18383      | -1.252379513 | 0.393522657 | -5.179251995 | 0.051053893 |
| Al848100 226551      | -1.252571003 | 0.270593227 | -1.953493867 | 0.005793574 |
| Tmem129 68366        | -1.25281057  | 0.074360521 | -1.283644504 | 0.018969584 |
| Cops4 26891          | -1.252961359 | 0.053460693 | -1.391680372 | 0.006169262 |
| Gm6251 621697        | -1.25305474  | 0.141489289 | -1.095609735 | 0.298667599 |
| Lgals9 16859         | -1.253121062 | 0.021641168 | -1.316839124 | 0.010725574 |
| Snx9 66616           | -1.253178942 | 0.141679766 | -1.107476272 | 0.27859283  |
| Tiam1 21844          | -1.253203981 | 0.328294879 | -1.584610843 | 0.217334142 |
| Usp22 216825         | -1.253220663 | 0.192406706 | -1.637367034 | 0.017283115 |
| Tra2b 20462          | -1.253251612 | 0.088101469 | -1.263802738 | 0.029956829 |
| Atxn7 246103         | -1.253298904 | 0.23847025  | 1.03608996   | 0.434515756 |
| Gabbr1 54393         | -1.253386945 | 0.2316725   | -1.253386945 | 0.2316725   |
| Lphn1 330814         | -1.253601675 | 0.096164071 | -1.41789817  | 0.020124166 |
| Tmem134 66990        | -1.253617046 | 0.011072195 | -1.335262781 | 0.001545242 |
| Mfsd7a 243197        | -1.25364117  | 0.143594826 | -1.25364117  | 0.143594826 |
| Prkrir 72981         | -1.253664382 | 0.009620073 | -1.210092474 | 0.020701908 |
| S100a8 20201         | -1.253797875 | 0.401267692 | 1.255130842  | 0.411829119 |
| Acsm3 20216          | -1.253853108 | 0.137692984 | -1.139135828 | 0.2483706   |
| Hoxb5 15413          | -1.253949938 | 0.279822397 | -1.253949938 | 0.279822397 |
| Ift172 67661         | -1.254047091 | 0.06075068  | -1.254047091 | 0.06075068  |
| Fuca1 71665          | -1.254063036 | 0.049698037 | -1.254063036 | 0.049698037 |
| Zfx 22764            | -1.254173617 | 0.194836723 | -1.385858863 | 0.058770378 |
| Zfp790 233056        | -1.254185489 | 0.249114682 | -1.254185489 | 0.249114682 |
| Dpys 64705           | -1.254232165 | 0.002663032 | -1.220176656 | 0.006389456 |
| Stx8 55943           | -1.254307151 | 0.19219353  | -1.465498246 | 0.083364124 |
| Idh3g 15929          | -1.254354663 | 0.004725741 | -1.191438128 | 0.006644886 |
| Pcyox1 66881         | -1.254421978 | 0.07939839  | -1.324478572 | 0.05666905  |
| Zbed3 72114          | -1.254549677 | 0.060120791 | -1.148135245 | 0.122582558 |
| Hmha1 70719          | -1.254562255 | 0.052078634 | -1.1654319   | 0.105431836 |
| Ankrd16 320816       | -1.254579933 | 0.160618549 | -1.254579933 | 0.160618549 |
| Gsta3 14859          | -1.254820689 | 0.062354538 | -1.434925479 | 0.004129247 |
| Mtor 56717           | -1.254899113 | 0.061220241 | -1.254899113 | 0.061220241 |
| Slc25a32 69906       | -1.254938257 | 0.315817189 | 1.094973071  | 0.421742541 |
| Ralgapb 228850       | -1.254984627 | 0.158413923 | -1.342435416 | 0.041503798 |
| Slc37a3 72144        | -1.255018834 | 0.026712689 | -1.255018834 | 0.026712689 |
| Mylk 107589          | -1.255109459 | 0.127014611 | -1.141942857 | 0.197340284 |
| Ric8b 237422         | -1.255133531 | 0.068672427 | -1.310914948 | 0.044727563 |
| Mapk1ip1 69546       | -1.25514679  | 0.087600607 | -1.065612085 | 0.310940147 |
| Cdr2l 237988         | -1.255306591 | 0.108497193 | -1.155448506 | 0.200636173 |
| Dhx32 101437         | -1.255359243 | 0.064613692 | -1.255359243 | 0.064613692 |
| Abcc9 20928          | -1.255517947 | 0.201378238 | 1.059361794  | 0.391811258 |
| Entpd6 12497         | -1.255542433 | 0.135837093 | -1.081623339 | 0.297744075 |
| Dna2 327762          | -1.255753253 | 0.093107929 | -1.263853122 | 0.070373493 |

|                      |              |             |              |             |
|----------------------|--------------|-------------|--------------|-------------|
| Stab1 192187         | -1.255804213 | 0.006429307 | -1.271847221 | 0.000682181 |
| Bmp8b 12164          | -1.255828959 | 0.401589961 | -2.8202      | 0.173296754 |
| Vcl 22330            | -1.256035918 | 0.208184691 | -1.168944813 | 0.271045544 |
| Apob 238055          | -1.256086277 | 0.015836083 | -1.33867608  | 0.000353899 |
| 2610005L07Rik 381598 | -1.256235151 | 0.203158201 | -1.468249931 | 0.096772936 |
| Hadh 15107           | -1.256326416 | 0.007455118 | -1.256326416 | 0.007455118 |
| Serpina3n 20716      | -1.256328979 | 0.07918091  | -1.371621323 | 0.011301036 |
| Rab1b 76308          | -1.256365512 | 0.017810604 | -1.256365512 | 0.017810604 |
| Sfswap 231769        | -1.25637092  | 0.017055395 | -1.408357549 | 0.000272458 |
| 1810043G02Rik 67884  | -1.256403413 | 0.070942733 | -1.338019817 | 0.027359399 |
| Fgd5 232237          | -1.256442127 | 0.170314029 | -1.182677387 | 0.19839728  |
| Gbe1 74185           | -1.256459913 | 0.081882428 | -1.181918724 | 0.051613396 |
| Rab43 69834          | -1.256523402 | 0.035020682 | -1.105982844 | 0.128688268 |
| Fancc 14088          | -1.256615525 | 0.149653125 | -1.137760314 | 0.27634445  |
| Cmb1 69574           | -1.256716323 | 0.001632867 | -1.217820449 | 0.001308136 |
| Cgn 70737            | -1.256743904 | 0.10350568  | -1.366475435 | 0.055494212 |
| Epb4.112 13822       | -1.256942535 | 0.214581896 | 1.106066857  | 0.278368805 |
| Got2 14719           | -1.257058221 | 0.001985889 | -1.257058221 | 0.001985889 |
| 4930404N11Rik 432479 | -1.257123332 | 0.302790538 | -1.95955702  | 0.059229023 |
| Ctdp1 67655          | -1.257261704 | 0.056075354 | -1.239731756 | 0.020586939 |
| Rgs3 50780           | -1.257296376 | 0.101886556 | -1.135483821 | 0.209646708 |
| Tln2 70549           | -1.25732012  | 0.159888089 | -1.25732012  | 0.159888089 |
| Acbd4 67131          | -1.257363563 | 0.092014879 | -1.257363563 | 0.092014879 |
| Alkbh3 69113         | -1.257533808 | 0.070981658 | -1.378679226 | 0.023311065 |
| Ccdc132 73288        | -1.257560679 | 0.19707389  | -1.257560679 | 0.19707389  |
| Uroc1 243537         | -1.257843129 | 0.068395203 | -1.438856144 | 0.003127522 |
| Fam123a 72125        | -1.25787034  | 0.335112066 | 1.077347807  | 0.448394543 |
| Apom 55938           | -1.257888616 | 0.189469601 | -1.275335668 | 0.132798585 |
| 2410002O22Rik 66975  | -1.257909387 | 0.061561087 | -1.379828451 | 0.016836749 |
| Slc47a1 67473        | -1.258348091 | 0.112110028 | -1.119754262 | 0.234611548 |
| Zbtb9 474156         | -1.258604389 | 0.073367877 | -1.373046578 | 0.009393522 |
| 3110040N11Rik 67290  | -1.258687559 | 0.155966169 | -1.096608797 | 0.320318248 |
| Nr2c1 22025          | -1.258688418 | 0.069492608 | -1.258688418 | 0.069492608 |
| Gls 14660            | -1.258731185 | 0.154438888 | -1.258731185 | 0.154438888 |
| Mrps11 67994         | -1.258814934 | 0.145358958 | -1.014984811 | 0.463663154 |
| Uggt2 66435          | -1.258829595 | 0.336638718 | -1.459026591 | 0.237981721 |
| Lims2 225341         | -1.25884687  | 0.054616698 | -1.33244538  | 0.033539919 |
| Zfp187 432731        | -1.258896158 | 0.166657592 | -1.258896158 | 0.166657592 |
| Parp10 671535        | -1.258939927 | 0.025408521 | -1.364239825 | 0.003508805 |
| Rassf2 215653        | -1.25902942  | 0.204771438 | -1.776450628 | 0.006040696 |
| Gpatch8 237943       | -1.25903031  | 0.199057989 | -1.048977576 | 0.41682773  |
| Gas8 104346          | -1.259084141 | 0.038708375 | -1.090776568 | 0.115453251 |
| Bcor11 320376        | -1.2591007   | 0.177513022 | -1.101101699 | 0.256921602 |
| Zbtb8os 67106        | -1.259119431 | 0.161546766 | 1.047376123  | 0.347311155 |
| Pcbd2 72562          | -1.259241431 | 0.01631412  | -1.135624221 | 0.054393601 |
| Tmem85 68032         | -1.259452914 | 0.0467557   | -1.208990103 | 0.087307358 |
| Mgrn1 17237          | -1.259639036 | 0.063480683 | -1.331736673 | 0.029080344 |
| Pdzrn3 55983         | -1.259673786 | 0.164000374 | -1.35649129  | 0.033116462 |
| Ndst1 15531          | -1.259709725 | 0.308872894 | 1.172380143  | 0.333020814 |
| Zfp410 52708         | -1.259794984 | 0.208510216 | -1.590530546 | 0.04679554  |
| Cry2 12953           | -1.259815738 | 0.030733001 | -1.180608274 | 0.059115827 |
| Aes 14797            | -1.25990568  | 0.204361308 | -1.282908442 | 0.121918766 |
| Fli1 14247           | -1.260174524 | 0.235302242 | -1.053251937 | 0.422384832 |

|                         |              |             |              |             |
|-------------------------|--------------|-------------|--------------|-------------|
| Wdr75 73674             | -1.26019271  | 0.144447866 | -1.101991184 | 0.288850309 |
| Tsen15 66637            | -1.260315253 | 0.205920418 | -1.112299416 | 0.355450575 |
| Tmem205 235043          | -1.260351608 | 0.166870526 | -1.232261829 | 0.144310576 |
| D8Erttd82e 244418       | -1.260579602 | 0.197419625 | -1.466308125 | 0.096191656 |
| Stk3 56274              | -1.260673144 | 0.273975489 | -1.260673144 | 0.273975489 |
| Sfxn2 94279             | -1.260747627 | 0.01453225  | -1.118415302 | 0.013250086 |
| Fhad1 329977            | -1.260773907 | 0.194541599 | -1.260773907 | 0.194541599 |
| Sowahb 78088            | -1.260905231 | 0.22557763  | -1.260905231 | 0.22557763  |
| Syt11 229521            | -1.261119164 | 0.160301151 | -1.087808137 | 0.321889754 |
| Spsb2 14794             | -1.261183386 | 0.07156581  | -1.19249269  | 0.047045234 |
| Mgp 17313               | -1.261242829 | 0.336413522 | -1.63487368  | 0.222811858 |
| Cbl1 104836             | -1.26131186  | 0.130369359 | -1.25689236  | 0.090981337 |
| Tigd5 105734            | -1.261330687 | 0.187988638 | -1.245587903 | 0.156379961 |
| Acvr2b 11481            | -1.26141913  | 0.181236183 | -1.274752096 | 0.098404299 |
| Tmem186 66690           | -1.26146894  | 0.118100662 | -1.26146894  | 0.118100662 |
| Zfp128 243833           | -1.26173228  | 0.337328191 | 1.639240756  | 0.052190564 |
| Mtss1 211401            | -1.261851269 | 0.202312096 | -1.516998408 | 0.076732253 |
| Lad1 16763              | -1.261870987 | 0.150956095 | -1.261870987 | 0.150956095 |
| Man2c1 73744            | -1.261933294 | 0.012383233 | -1.235981993 | 0.007148972 |
| Mettl22 239706          | -1.262175383 | 0.192316518 | -1.440770849 | 0.056037316 |
| Pcca 110821             | -1.26219614  | 0.106358417 | -1.380866076 | 0.054679489 |
| Aak1 269774             | -1.262317885 | 0.143070273 | -1.101486495 | 0.299365061 |
| Stk11 20869             | -1.262588222 | 0.005715    | -1.260175061 | 0.010050031 |
| Rcbtb2 105670           | -1.262609525 | 0.065097511 | -1.432306019 | 0.005091474 |
| Tsyp1 22110             | -1.26263361  | 0.191119715 | -1.190846561 | 0.228869034 |
| Mon1b 270096            | -1.262724137 | 0.108722362 | -1.123338063 | 0.227445946 |
| 5430416N02Rik 100041797 | -1.262841373 | 0.196306559 | -1.057457425 | 0.405319708 |
| Zmym6 100177            | -1.262888146 | 0.337803226 | -1.262888146 | 0.337803226 |
| Nub1 53312              | -1.262962789 | 0.000511103 | -1.255620164 | 0.000307594 |
| Dnmt1 13433             | -1.263077806 | 0.271917389 | -1.00738949  | 0.487941222 |
| Cul7 66515              | -1.263108189 | 0.106517446 | -1.601084085 | 0.000563997 |
| Eid2 386655             | -1.263167257 | 0.370650152 | -2.057583119 | 0.184774269 |
| Trf 22041               | -1.263193153 | 0.080559199 | -1.246135635 | 0.046843821 |
| Pcyt1a 13026            | -1.263197654 | 0.204380426 | 1.082875248  | 0.335309074 |
| A630007B06Rik 213993    | -1.263345047 | 0.382407463 | 1.397748466  | 0.352468975 |
| Zc3h14 75553            | -1.263362344 | 0.12442     | -1.359947108 | 0.085229864 |
| Zfp119b 240120          | -1.263416139 | 0.324820318 | -2.761147608 | 0.004142902 |
| Tufm 233870             | -1.263470422 | 0.017535017 | -1.206512329 | 0.037631102 |
| Csf3r 12986             | -1.263500159 | 0.254828044 | -1.687196477 | 0.072869477 |
| Ddx58 230073            | -1.263514558 | 0.129163251 | -1.540238524 | 0.005743622 |
| Itga4 16401             | -1.263543392 | 0.111035476 | -1.098737512 | 0.233299561 |
| Adamts4 240913          | -1.26356978  | 0.406838122 | -7.725       | 0.072984714 |
| Slc25a17 20524          | -1.263625768 | 0.055712999 | -1.147129635 | 0.111022612 |
| 2810453I06Rik 67238     | -1.263727985 | 0.079626278 | -1.372036376 | 0.017350359 |
| Prdm15 114604           | -1.263917862 | 0.347457245 | -1.034412002 | 0.470320406 |
| Adar 56417              | -1.263945465 | 0.017017165 | -1.12594805  | 0.028943096 |
| 5730409E04Rik 230757    | -1.264059633 | 0.131975075 | -1.264059633 | 0.131975075 |
| Capns1 12336            | -1.264092826 | 0.123487599 | -1.253770632 | 0.072346203 |
| Hsd3b7 101502           | -1.264390058 | 0.012819204 | -1.260256591 | 0.000470792 |
| BC049762 193286         | -1.264547479 | 0.321753856 | -1.264547479 | 0.321753856 |
| Crtam 54698             | -1.264669856 | 0.402322572 | -6.194816667 | 0.093788939 |
| Fjx1 14221              | -1.264669856 | 0.402322572 | -6.194816667 | 0.093788939 |
| Zfp574 232976           | -1.264860325 | 0.089766837 | -1.434094415 | 0.017957084 |

|                      |              |             |              |             |
|----------------------|--------------|-------------|--------------|-------------|
| Ero1l 50527          | -1.264882418 | 0.125144385 | -1.12306123  | 0.257549797 |
| Ssfa2 70599          | -1.264888337 | 0.280353874 | -1.193990527 | 0.298159671 |
| Agpat1 55979         | -1.265029344 | 0.044749698 | -1.377373894 | 0.011670501 |
| Hmga1 15361          | -1.265347607 | 0.036365888 | -1.162584011 | 0.055746378 |
| Al467606 101602      | -1.265363106 | 0.365222852 | -2.178604522 | 0.172235104 |
| Slc22a15 242126      | -1.265456962 | 0.060078091 | -1.355939252 | 0.004638087 |
| Heatr7b1 100040766   | -1.265561645 | 0.240978047 | -1.511007903 | 0.059506486 |
| Abcb10 56199         | -1.265674486 | 0.133655594 | -1.265674486 | 0.133655594 |
| Ash1l 192195         | -1.265950381 | 0.23182888  | -1.211595158 | 0.251202491 |
| Tom1l1 71943         | -1.265968993 | 0.172263952 | -1.265968993 | 0.172263952 |
| Nacc1 66830          | -1.266017268 | 0.007168449 | -1.266017268 | 0.007168449 |
| Rps6ka2 20112        | -1.266066379 | 0.064297133 | -1.379026003 | 0.024345651 |
| Ccl9 20308           | -1.26607538  | 0.044750106 | -1.268953696 | 0.026734919 |
| Bmp4 12159           | -1.266153874 | 0.144786643 | -1.102271017 | 0.302464334 |
| Pik3r5 320207        | -1.266204441 | 0.13531734  | -1.121310451 | 0.274683274 |
| Apobec3 80287        | -1.266246532 | 0.189113809 | -1.641866645 | 0.0158237   |
| Lrrc51 69358         | -1.266489367 | 0.224522201 | -1.125007683 | 0.347323496 |
| Zdhhc13 243983       | -1.266497454 | 0.295054002 | -1.266497454 | 0.295054002 |
| Golm1 105348         | -1.266508372 | 0.190560573 | -1.266508372 | 0.190560573 |
| 1810024B03Rik 329509 | -1.266582675 | 0.200684109 | -1.238644805 | 0.014842791 |
| Nelf 56876           | -1.266841209 | 0.004299652 | -1.20785532  | 0.004546937 |
| Nav1 215690          | -1.266873234 | 0.101260835 | -1.110881185 | 0.208941878 |
| Cyp3a25 56388        | -1.266995919 | 0.129099714 | -1.243076848 | 0.069697701 |
| Mup21 381531         | -1.267044316 | 0.111063423 | -1.267044316 | 0.111063423 |
| D330012F22Rik 269952 | -1.267053093 | 0.120839339 | -1.021934924 | 0.434970962 |
| Banp 53325           | -1.267055984 | 0.050544918 | -1.158068483 | 0.101748423 |
| Mgat3 17309          | -1.26713579  | 0.396662316 | 1.282144901  | 0.403677687 |
| Aars2 224805         | -1.26719805  | 0.055898663 | -1.149512745 | 0.111697311 |
| Ston2 108800         | -1.267265786 | 0.214126915 | -1.267265786 | 0.214126915 |
| Papss1 23971         | -1.267276853 | 0.234899431 | -1.267276853 | 0.234899431 |
| Trfr2 50765          | -1.267301903 | 0.000707998 | -1.357899714 | 5.71681E-06 |
| Selp 20344           | -1.267372387 | 0.298989432 | -1.060145974 | 0.444180875 |
| Plxb2 140570         | -1.267382676 | 0.000456444 | -1.304481823 | 7.38477E-05 |
| Dhrs1 52585          | -1.267419945 | 0.00670953  | -1.200691542 | 0.006744758 |
| Rdh9 103142          | -1.267460498 | 0.079928752 | -1.267460498 | 0.079928752 |
| Nf2 18016            | -1.267464235 | 0.126931959 | -1.110277757 | 0.268272212 |
| Mamdc2 71738         | -1.267727407 | 0.232076047 | -1.43136457  | 0.120870554 |
| Wdr70 545085         | -1.267736858 | 0.10651962  | -1.358423186 | 0.019911964 |
| Bid 12122            | -1.26776951  | 0.092766011 | -1.21784509  | 0.07189963  |
| Nmnat3 74080         | -1.268072875 | 0.072844277 | -1.059206624 | 0.283759078 |
| Khdrbs1 20218        | -1.268107769 | 0.092167782 | -1.371029394 | 0.025610684 |
| Lyn 17096            | -1.268145678 | 0.079022965 | -1.555726589 | 0.000252829 |
| Mtif3 76366          | -1.268228102 | 0.059735768 | -1.268228102 | 0.059735768 |
| Mtrf1l 108853        | -1.268294067 | 0.140493181 | -1.427997309 | 0.065658104 |
| Fig4 103199          | -1.268330838 | 0.093115238 | -1.406335788 | 0.009635118 |
| Kank1 107351         | -1.268394606 | 0.212842309 | -1.056459382 | 0.419442895 |
| Tubgcp3 259279       | -1.268420234 | 0.166520774 | -1.397024454 | 0.10995791  |
| Shroom1 71774        | -1.268467087 | 0.01095724  | -1.213265729 | 0.023793039 |
| Pcnt 18541           | -1.268528281 | 0.116623426 | -1.196254985 | 0.197696415 |
| Znfx1 98999          | -1.26867391  | 0.077925811 | -1.135353562 | 0.154294628 |
| Btbd9 224671         | -1.268882282 | 0.027820174 | -1.449844608 | 0.000563021 |
| Irf6 54139           | -1.269024375 | 0.085170631 | -1.130498148 | 0.171984335 |
| Hif3a 53417          | -1.269071298 | 0.346091174 | 1.74399645   | 0.057734153 |



|                     |              |             |              |             |
|---------------------|--------------|-------------|--------------|-------------|
| Apoa2 11807         | -1.269207608 | 0.190976195 | -1.185611607 | 0.230979505 |
| Spc24 67629         | -1.269235153 | 0.034610507 | -1.407738921 | 0.002244271 |
| Tjap1 74094         | -1.269243254 | 0.060379555 | -1.399451268 | 0.015663031 |
| Batf 53314          | -1.269317497 | 0.306748093 | -1.836985521 | 0.119060806 |
| Lipc 15450          | -1.269433574 | 0.044472218 | -1.269433574 | 0.044472218 |
| Tesk1 21754         | -1.269434327 | 0.017791089 | -1.269434327 | 0.017791089 |
| Bag1 12017          | -1.269575516 | 0.053950256 | -1.221478756 | 0.095844204 |
| Tspan15 70423       | -1.269685884 | 0.192724811 | -1.766959714 | 0.005370535 |
| Tbkbp1 73174        | -1.269695146 | 0.05489682  | -1.396811026 | 0.01357301  |
| Sema4a 20351        | -1.269813384 | 0.000211403 | -1.228576818 | 0.000235273 |
| Slc39a3 106947      | -1.269897889 | 0.013876273 | -1.245608671 | 0.003540098 |
| Zfp260 26466        | -1.270126031 | 0.106707807 | -1.144355732 | 0.21733556  |
| Pcf11 74737         | -1.270189729 | 0.148634083 | -1.473730008 | 0.051269534 |
| Zdhhc9 208884       | -1.27026834  | 0.000625039 | -1.245375261 | 0.001703771 |
| Tgfbrap1 73122      | -1.270470932 | 0.033969355 | -1.109114402 | 0.11860454  |
| Lipg 16891          | -1.270682197 | 0.181598878 | -1.080099979 | 0.3694313   |
| Sf3a2 20222         | -1.270736619 | 0.054866046 | -1.163367115 | 0.107405114 |
| Fcgr3 14131         | -1.270768878 | 0.08483026  | -1.398735477 | 0.011080928 |
| Mtss1l 244654       | -1.270966168 | 0.067491447 | -1.270966168 | 0.067491447 |
| Rnf26 213211        | -1.271074237 | 0.034046041 | -1.118042856 | 0.125650899 |
| Xpa 22590           | -1.271150096 | 0.136135177 | -1.271150096 | 0.136135177 |
| Fech 14151          | -1.271386707 | 0.066180651 | -1.271386707 | 0.066180651 |
| Dcaf15 212123       | -1.271604254 | 0.173327013 | -1.431820223 | 0.057259156 |
| Egln3 112407        | -1.271831258 | 0.1961888   | -1.314334407 | 0.142757405 |
| Slc25a13 50799      | -1.271897606 | 0.082654708 | -1.27685545  | 0.05817163  |
| Pofut1 140484       | -1.271948017 | 0.028600987 | -1.216793354 | 0.012217562 |
| Zfp948 381066       | -1.271973423 | 0.37816165  | -3.956991387 | 0.065139467 |
| Phf7 71838          | -1.272034312 | 0.173006657 | -1.435878891 | 0.098169507 |
| Tyw1 100929         | -1.272145292 | 0.138436683 | -1.459278381 | 0.050965837 |
| Dus2l 66369         | -1.27217242  | 0.18652277  | -1.440978052 | 0.110147176 |
| St7l 229681         | -1.272219789 | 0.189249306 | -1.092663995 | 0.364552186 |
| Dand5 23863         | -1.272230453 | 0.116472456 | -1.272230453 | 0.116472456 |
| Smarca2 67155       | -1.27223733  | 0.126438617 | -1.239193742 | 0.121986949 |
| Igsf21 230868       | -1.272277489 | 0.312964352 | -1.081156729 | 0.431489825 |
| Il17rc 171095       | -1.272321997 | 0.152280856 | -1.524413926 | 0.033230578 |
| Srr 27364           | -1.272461958 | 0.05221149  | -1.107316885 | 0.190395374 |
| 2810422J05Rik 75620 | -1.272479822 | 0.009352818 | -1.357697414 | 0.001369676 |
| Ankrd42 73845       | -1.27248592  | 0.395615311 | 1.11373758   | 0.461395715 |
| Tnrc6c 217351       | -1.272491364 | 0.076577136 | -1.196538715 | 0.082999412 |
| Srrm2 75956         | -1.272523166 | 0.010692424 | -1.226704982 | 0.023781344 |
| Ciz1 68379          | -1.272599892 | 0.016299728 | -1.272599892 | 0.016299728 |
| 1110020G09Rik 68646 | -1.272681393 | 0.151509636 | -1.272681393 | 0.151509636 |
| Bahd1 228536        | -1.272756345 | 0.150532915 | -1.451453097 | 0.067221701 |
| Ppp2r5e 26932       | -1.272900356 | 0.016469574 | -1.272900356 | 0.016469574 |
| Kcnt2 240776        | -1.273031136 | 0.384865273 | -3.967316667 | 0.09324139  |
| Susd3 66329         | -1.273031136 | 0.384865273 | -3.967316667 | 0.09324139  |
| Lyve1 114332        | -1.273084483 | 0.189577952 | -1.182979163 | 0.199842033 |
| Vars2 68915         | -1.273183469 | 0.059280568 | -1.148005107 | 0.106024275 |
| Arhgef12 69632      | -1.273339855 | 0.060537689 | -1.225164769 | 0.05635818  |
| Trim11 94091        | -1.273391648 | 0.142872851 | -1.064591818 | 0.323260962 |
| Fgl1 234199         | -1.2734215   | 0.130604778 | -1.27842047  | 0.090606876 |
| BC005561 100042165  | -1.27357244  | 0.262841598 | -1.596188536 | 0.133527739 |
| Slc39a8 67547       | -1.273642165 | 0.074276886 | -1.155593224 | 0.151673394 |

|                      |              |             |              |             |
|----------------------|--------------|-------------|--------------|-------------|
| Snx19 102607         | -1.273735625 | 0.038342638 | -1.202364981 | 0.079076573 |
| Gtpbp5 52856         | -1.273736145 | 0.033792365 | -1.199170543 | 0.069238815 |
| Nars2 244141         | -1.273770745 | 0.19387608  | -1.273770745 | 0.19387608  |
| Gas6 14456           | -1.273907931 | 0.075877769 | -1.571287524 | 0.000334594 |
| Spag4 245865         | -1.273946958 | 0.293382401 | -1.846496639 | 0.097111319 |
| Alcam 11658          | -1.273947392 | 0.025486947 | -1.283763958 | 0.011943745 |
| Ap1m1 11767          | -1.274000164 | 0.008123961 | -1.336998111 | 0.003246033 |
| Tk1 21877            | -1.274123404 | 0.242692556 | -1.708176939 | 0.061268476 |
| Speg 11790           | -1.274202412 | 0.259097172 | 1.040628045  | 0.448194069 |
| Clk4 12750           | -1.274248353 | 0.213530751 | -1.06322863  | 0.413893619 |
| 2610507B11Rik 72503  | -1.274338384 | 0.005916726 | -1.206352777 | 0.005249945 |
| Lhx2 16870           | -1.274417962 | 0.206084033 | -1.112845041 | 0.346112796 |
| Stag1 20842          | -1.274491736 | 0.170629249 | -1.378277252 | 0.061917776 |
| Bcl9l 80288          | -1.274495096 | 0.059672854 | -1.155743041 | 0.06435119  |
| Sipa11l 217692       | -1.274507154 | 0.039567653 | -1.195368536 | 0.081257015 |
| Kif7 16576           | -1.274535621 | 0.240605824 | -1.390844258 | 0.173813491 |
| Agfg2 231801         | -1.274840814 | 0.016725086 | -1.221377303 | 0.036047201 |
| Rgmb 68799           | -1.274916091 | 0.3020346   | -1.274916091 | 0.3020346   |
| VeZF1 22344          | -1.275049786 | 0.218161773 | -1.275049786 | 0.218161773 |
| Nup214 227720        | -1.275110809 | 0.026226735 | -1.275110809 | 0.026226735 |
| Cask 12361           | -1.275291912 | 0.145186832 | -1.158820724 | 0.26260667  |
| Utp6 216987          | -1.275299772 | 0.023035478 | -1.205471499 | 0.048516877 |
| Cwf19l1 72502        | -1.275458962 | 0.055918655 | -1.177402947 | 0.11370702  |
| Zfp746 69228         | -1.275565883 | 0.140305378 | -1.346297784 | 0.064152567 |
| Axl 26362            | -1.275585318 | 0.169775402 | -1.275585318 | 0.169775402 |
| Cic 71722            | -1.275589495 | 0.153996651 | -1.379982285 | 0.113626511 |
| Scly 50880           | -1.275715911 | 0.008378515 | -1.32158569  | 0.006054415 |
| Lrrc24 378937        | -1.275742138 | 0.397652912 | -1.305244483 | 0.378399987 |
| Hsd3b3 15494         | -1.27579571  | 0.053424961 | -1.449551685 | 0.002857332 |
| Cacng7 81904         | -1.27588365  | 0.354772041 | -1.27588365  | 0.354772041 |
| Pmaip1 58801         | -1.275899985 | 0.256772726 | -1.512880075 | 0.097462385 |
| Col15a1 12819        | -1.275932048 | 0.26903713  | -1.728853382 | 0.095728567 |
| Insr 16337           | -1.275961965 | 0.158773686 | -1.142559431 | 0.228640815 |
| Slc7a7 20540         | -1.275981712 | 0.164442671 | -1.524408809 | 0.048174033 |
| Zscan2 22691         | -1.275989197 | 0.206588438 | -1.800605173 | 0.002591507 |
| Rsad1 237926         | -1.276047407 | 0.138837553 | -1.287001376 | 0.047086798 |
| Rfc3 69263           | -1.276062612 | 0.181338712 | -1.095050759 | 0.356136391 |
| Mocs1 56738          | -1.27608826  | 0.051646882 | -1.27608826  | 0.051646882 |
| Exoc6 107371         | -1.276144956 | 0.213027859 | -1.035452931 | 0.446056856 |
| Crtc3 70461          | -1.276340413 | 0.118830869 | -1.134022238 | 0.24416124  |
| Zfp516 329003        | -1.27647531  | 0.149427864 | -1.283901804 | 0.092833023 |
| Gm10768 100038628    | -1.276679459 | 0.017213267 | -1.340232203 | 0.004681094 |
| Rfx7 319758          | -1.276681527 | 0.238199451 | -1.276681527 | 0.238199451 |
| 4930524L23Rik 78185  | -1.277012407 | 0.320424379 | -1.277012407 | 0.320424379 |
| Ddx41 72935          | -1.277094968 | 0.118829749 | -1.277094968 | 0.118829749 |
| E130309F12Rik 272031 | -1.277325724 | 0.346405787 | -2.22811962  | 0.130894336 |
| Cml2 93673           | -1.277732232 | 0.004287246 | -1.326658128 | 0.001092808 |
| Tpm3 59069           | -1.277743865 | 0.030578996 | -1.204858694 | 0.062721036 |
| Fbxw7 50754          | -1.277779887 | 0.104196804 | -1.028022855 | 0.411357076 |
| Coro1b 23789         | -1.277915876 | 0.059784601 | -1.377950919 | 0.02916021  |
| Adamts4 229595       | -1.277985542 | 0.119037147 | -1.133316098 | 0.245261746 |
| Nsun6 74455          | -1.278666606 | 0.251031952 | -1.073190919 | 0.413701181 |
| Ccdc51 66658         | -1.278749546 | 0.145993902 | -1.408678162 | 0.059281656 |

|                      |              |             |              |             |
|----------------------|--------------|-------------|--------------|-------------|
| Fkrp 243853          | -1.278887136 | 0.114646871 | -1.622431703 | 0.003946985 |
| 5730455013Rik 70567  | -1.278909344 | 0.156428018 | -1.278909344 | 0.156428018 |
| Prkar2a 19087        | -1.27922528  | 0.244139754 | 1.017529169  | 0.475870442 |
| Pnkd 56695           | -1.279329365 | 0.004052956 | -1.279329365 | 0.004052956 |
| Wdr76 241627         | -1.279388292 | 0.248053715 | -1.202410955 | 0.287681895 |
| Agtrap 11610         | -1.279520775 | 0.101115432 | -1.225112982 | 0.164662367 |
| Sos1 20662           | -1.279715592 | 0.214916625 | -1.253693818 | 0.186897519 |
| Ppp1r12a 17931       | -1.279818502 | 0.309385239 | 1.433096181  | 0.132045177 |
| Cxxc5 67393          | -1.280098948 | 0.001027937 | -1.19553247  | 0.00109971  |
| Helq 191578          | -1.280120078 | 0.240426492 | -1.280120078 | 0.240426492 |
| Celf1 13046          | -1.280138745 | 0.229051329 | -1.280138745 | 0.229051329 |
| Ippk 75678           | -1.280141468 | 0.116891678 | -1.609355825 | 0.006202164 |
| A230072C01Rik 320742 | -1.280144167 | 0.260135228 | -1.603890736 | 0.085475572 |
| Hlf 217082           | -1.28028117  | 0.08635491  | -1.139760941 | 0.176636187 |
| Ube3b 117146         | -1.280388498 | 0.004081003 | -1.352424383 | 0.000708622 |
| Mapt 17762           | -1.280474074 | 0.250115957 | -1.178255363 | 0.249228049 |
| Cdh4 12561           | -1.28051818  | 0.335212368 | -1.28051818  | 0.335212368 |
| Mex3b 108797         | -1.280963333 | 0.386755678 | -6.404816667 | 0.044430303 |
| Bbx 70508            | -1.281017004 | 0.296158387 | 1.23144556   | 0.203431354 |
| Flna 192176          | -1.281189655 | 0.206663341 | -1.403812535 | 0.032936759 |
| Rnf44 105239         | -1.281259865 | 0.247293576 | -1.195279855 | 0.295605654 |
| Zfp386 56220         | -1.281371137 | 0.178794588 | -1.160518131 | 0.29891688  |
| Rev3l 19714          | -1.281376415 | 0.230419495 | -1.599845373 | 0.096057342 |
| Cyp20a1 77951        | -1.281433236 | 0.257828253 | -1.467944489 | 0.143295151 |
| Fuca2 66848          | -1.281437083 | 0.218959223 | 1.082872039  | 0.372836543 |
| Ndor1 78797          | -1.281532627 | 0.025493324 | -1.451810117 | 0.000364237 |
| Gatc 384281          | -1.281551645 | 0.014058695 | -1.375142317 | 0.002566809 |
| Dyrk3 226419         | -1.281735163 | 0.220921576 | -1.129074958 | 0.237170275 |
| Zfp467 68910         | -1.281742981 | 0.016602642 | -1.437238186 | 0.000828059 |
| Sh2d3c 27387         | -1.281763069 | 0.037954477 | -1.382160796 | 0.002635358 |
| Kcnj10 16513         | -1.281979689 | 0.343708965 | -1.410184994 | 0.208275831 |
| Nisch 64652          | -1.282072764 | 0.009196361 | -1.331193008 | 0.006423891 |
| Col13a1 12817        | -1.282122381 | 0.052974243 | -1.206315816 | 0.106894029 |
| Fam118a 73225        | -1.282222278 | 0.292225796 | -1.282222278 | 0.292225796 |
| Cux2 13048           | -1.282309673 | 0.068694721 | -1.106997038 | 0.224688501 |
| Myo5b 17919          | -1.282370464 | 0.07689518  | -1.262610675 | 0.023420248 |
| Pdf 68023            | -1.282514436 | 0.043409824 | -1.161749964 | 0.081784054 |
| Fam107b 66540        | -1.282725487 | 0.141311552 | -1.126636504 | 0.284679157 |
| Chst7 60322          | -1.282742683 | 0.347515529 | -1.282742683 | 0.347515529 |
| Enpp5 83965          | -1.282775524 | 0.075373776 | -1.282775524 | 0.075373776 |
| Syap1 67043          | -1.282984059 | 0.199166035 | -1.609514546 | 0.055335681 |
| Dcaf7 71833          | -1.283069955 | 0.246395911 | 1.014174242  | 0.481448745 |
| Slc6a12 14411        | -1.283081653 | 0.005552656 | -1.320236572 | 0.005003686 |
| Zfp446 269870        | -1.283126076 | 0.17888657  | -1.138323722 | 0.318042065 |
| Irf1 16362           | -1.283250687 | 0.076540392 | -1.267104028 | 0.034463641 |
| H2-DMa 14998         | -1.283268066 | 0.216732566 | -1.588497315 | 0.025400018 |
| Slc12a5 57138        | -1.283272763 | 0.124209846 | -1.009255364 | 0.464224008 |
| Parp1 11545          | -1.28332907  | 0.068746412 | -1.28332907  | 0.068746412 |
| Vsig4 278180         | -1.283392935 | 0.148425948 | -1.283392935 | 0.148425948 |
| Rsph4a 212892        | -1.283396357 | 0.268804416 | 1.061367014  | 0.429000526 |
| Ces2e 234673         | -1.283543666 | 0.009116732 | -1.341482128 | 0.002262869 |
| Ppp1r12b 329251      | -1.283606591 | 0.390191718 | 1.170129778  | 0.437059136 |
| Nr4a1 15370          | -1.283617073 | 0.30558231  | -1.134913908 | 0.377417309 |

|                      |              |             |              |             |
|----------------------|--------------|-------------|--------------|-------------|
| D730040F13Rik 242474 | -1.28362798  | 0.20349999  | -1.107330194 | 0.366651204 |
| Col11a2 12815        | -1.28388744  | 0.359034401 | 1.239630944  | 0.388132903 |
| Ifi44 99899          | -1.283904082 | 0.111584321 | -1.283904082 | 0.111584321 |
| Unc13d 70450         | -1.284033779 | 0.273213046 | -1.309086592 | 0.21920762  |
| Jmjd8 72106          | -1.284040832 | 0.055074582 | -1.305941625 | 0.004514336 |
| Pars2 230577         | -1.28408739  | 0.221983631 | -1.28408739  | 0.221983631 |
| 40974 223455         | -1.284126316 | 0.172223917 | 1.030494105  | 0.43610832  |
| Fam65c 69553         | -1.28421403  | 0.233827996 | -1.065504205 | 0.425475803 |
| Ntan1 18203          | -1.284278771 | 0.044348726 | -1.257953341 | 0.035914771 |
| Necap2 66147         | -1.284479161 | 0.069332926 | -1.548564196 | 0.001051574 |
| Fbxw5 30839          | -1.284729112 | 0.041490134 | -1.232416689 | 0.078063233 |
| lqsec2 245666        | -1.28475209  | 0.024723176 | -1.200104401 | 0.050573954 |
| Thoc7 66231          | -1.284939001 | 0.113548466 | -1.532661752 | 0.01282073  |
| Bcap29 12033         | -1.284965763 | 0.273291527 | 1.001790113  | 0.498235268 |
| Slc39a4 72027        | -1.28496956  | 0.010377196 | -1.314224528 | 0.001290018 |
| Pard3b 72823         | -1.285207962 | 0.307483473 | -1.663529187 | 0.189019128 |
| Bcor 71458           | -1.285307278 | 0.063839792 | -1.274658006 | 0.015978646 |
| Hectd3 76608         | -1.285397555 | 0.0031522   | -1.34379422  | 0.000683071 |
| Rab14 68365          | -1.285415604 | 0.11954773  | -1.121089419 | 0.252874512 |
| Rrbp1 81910          | -1.285536434 | 0.105402741 | -1.432615258 | 0.046755671 |
| H2afy 26914          | -1.285537    | 0.013288875 | -1.285537    | 0.013288875 |
| Fkbp14 231997        | -1.285598574 | 0.185922295 | -1.545313858 | 0.071069139 |
| Slc39a6 106957       | -1.285622667 | 0.31243265  | -1.951485754 | 0.120564913 |
| Rnf10 50849          | -1.285667525 | 0.022356247 | -1.285667525 | 0.022356247 |
| Shisa2 219134        | -1.285679259 | 0.36403843  | -3.06356435  | 0.047515593 |
| 2810008D09Rik 76972  | -1.285707657 | 0.196902346 | -1.073507093 | 0.379802768 |
| Rreb1 68750          | -1.285711302 | 0.206670372 | -1.285711302 | 0.206670372 |
| Ugt1a10 394430       | -1.285862891 | 0.388691436 | -7.669380845 | 0.043082451 |
| Hmgn5 50887          | -1.286003492 | 0.035928837 | -1.195025289 | 0.070274562 |
| Ggcx 56316           | -1.2860236   | 0.03813641  | -1.194701268 | 0.075514718 |
| Acyp1 66204          | -1.286396068 | 0.161112235 | -1.546796782 | 0.045563462 |
| Gpam 14732           | -1.286474592 | 0.302734788 | 1.158996727  | 0.357902916 |
| Otub2 68149          | -1.286500887 | 0.232833261 | -1.607877572 | 0.101552798 |
| Sgpl1 20397          | -1.286542736 | 0.159089512 | -1.286542736 | 0.159089512 |
| Irgm1 15944          | -1.286712022 | 0.070971532 | -1.286712022 | 0.070971532 |
| Nfs1 18041           | -1.286763413 | 0.068233746 | -1.286763413 | 0.068233746 |
| Notch2 18129         | -1.28683722  | 0.20246921  | -1.020091283 | 0.460064144 |
| Stk19 54402          | -1.286851876 | 0.124636568 | -1.286851876 | 0.124636568 |
| Btnl9 237754         | -1.286872687 | 0.30939876  | -1.011219449 | 0.490588665 |
| Mapk8ip3 30957       | -1.286922646 | 0.064522551 | -1.286922646 | 0.064522551 |
| ldh3b 170718         | -1.286933598 | 0.000532352 | -1.286933598 | 0.000532352 |
| 5730437N04Rik 70544  | -1.286972686 | 0.021179212 | -1.194151508 | 0.029528081 |
| Kdm6a 22289          | -1.287051612 | 0.314889315 | -1.246197282 | 0.349321169 |
| Dcaf11 28199         | -1.287081336 | 0.000153261 | -1.32157623  | 2.64455E-05 |
| Son 20658            | -1.287101817 | 0.143398851 | -1.159493813 | 0.209863012 |
| Lrrc29 234684        | -1.287105469 | 0.102933537 | -1.162413256 | 0.207216276 |
| Nudt14 66174         | -1.287143919 | 0.103248445 | -1.506001351 | 0.016334326 |
| Vti1a 53611          | -1.287188028 | 0.014002392 | -1.379431546 | 0.00300289  |
| Wipf3 330319         | -1.287198392 | 0.044916803 | -1.198992268 | 0.091769543 |
| Dnajc5 13002         | -1.287245936 | 0.19782931  | -1.065243305 | 0.403886945 |
| Gpsm3 106512         | -1.287273293 | 0.164179671 | -1.684386089 | 0.005878046 |
| Itgb7 16421          | -1.28731284  | 0.216213461 | -1.526164123 | 0.116839611 |
| Ankrd17 81702        | -1.287384487 | 0.234741053 | 1.020520888  | 0.468955449 |

|                     |              |             |              |             |
|---------------------|--------------|-------------|--------------|-------------|
| Sardh 192166        | -1.287743881 | 0.005691633 | -1.427972068 | 5.61912E-05 |
| Nrn1 68404          | -1.28776054  | 0.041539801 | -1.358251511 | 0.028035751 |
| Adam10 11487        | -1.287941131 | 0.116664944 | -1.152636708 | 0.234036674 |
| Slc16a3 80879       | -1.287969754 | 0.352269115 | -1.810348122 | 0.188260339 |
| Pctp 18559          | -1.288042041 | 0.057960005 | -1.474353749 | 0.003830142 |
| Cd55 13136          | -1.288061321 | 0.166237702 | -1.047277837 | 0.389877147 |
| Smtn 29856          | -1.288073691 | 0.060232527 | -1.158518176 | 0.111650708 |
| Cetn3 12626         | -1.288213854 | 0.023895888 | -1.288213854 | 0.023895888 |
| Aurkb 20877         | -1.288222857 | 0.403696353 | 1            | #DIV/0!     |
| Tnfrsf25 85030      | -1.288222857 | 0.403696353 | 1            | #DIV/0!     |
| Chd5 269610         | -1.288222857 | 0.403696353 | 1            | #DIV/0!     |
| Cap2 67252          | -1.288222857 | 0.403696353 | 1            | #DIV/0!     |
| Cdh26 381409        | -1.288222857 | 0.403696353 | 1            | #DIV/0!     |
| Reln 19699          | -1.288228466 | 0.141751522 | -1.013995849 | 0.469370247 |
| Ube2w 66799         | -1.288341363 | 0.137105271 | -1.23709624  | 0.091098351 |
| Mmaa 109136         | -1.288434871 | 0.039706102 | -1.183149736 | 0.072166016 |
| Gm5523 433273       | -1.288511061 | 0.148617354 | -1.73156143  | 0.002423733 |
| Hmgcs2 15360        | -1.288702694 | 0.028605441 | -1.288702694 | 0.028605441 |
| Thyn1 77862         | -1.288751951 | 0.13307746  | -1.288751951 | 0.13307746  |
| Npr3 18162          | -1.288777957 | 0.277824604 | -1.041793967 | 0.463760206 |
| 2010011 20Rik 67017 | -1.288914526 | 0.005841035 | -1.176521365 | 0.016338477 |
| Apitd1 69928        | -1.288920026 | 0.379257424 | -4.016833333 | 0.093227909 |
| Gm711 279029        | -1.288920026 | 0.379257424 | -4.016833333 | 0.093227909 |
| Slc25a16 73132      | -1.288938048 | 0.306206334 | -1.131906807 | 0.380228195 |
| Cnp 12799           | -1.288964164 | 0.074228899 | -1.570708846 | 0.001406237 |
| Fam47e 384198       | -1.289084212 | 0.192407683 | -1.675112871 | 0.030341063 |
| Vwa1 246228         | -1.289127729 | 0.261547553 | -2.057651375 | 0.017585678 |
| Prdm9 213389        | -1.289143113 | 0.180124791 | -1.11378613  | 0.342331868 |
| BC018507 218333     | -1.289227127 | 0.252880126 | -1.007136113 | 0.483152771 |
| Klhl3 627648        | -1.289337918 | 0.307204467 | -2.423001018 | 0.031124376 |
| Usp18 24110         | -1.289433644 | 0.167124304 | -1.436276155 | 0.070559816 |
| Shmt2 108037        | -1.289715868 | 0.000976927 | -1.340364557 | 6.00929E-05 |
| Cbr4 234309         | -1.289748476 | 0.027968432 | -1.289748476 | 0.027968432 |
| Agl 77559           | -1.289771206 | 0.096414167 | -1.400921751 | 0.057819941 |
| Kank3 80880         | -1.289833095 | 0.099566033 | -1.030913514 | 0.391290756 |
| N4bp2 2 381695      | -1.289877868 | 0.123784622 | -1.030918483 | 0.428170102 |
| Mapkbp1 26390       | -1.289899745 | 0.1790068   | -1.448323596 | 0.114848213 |
| Aldh3a2 11671       | -1.290013212 | 0.101703662 | -1.148498772 | 0.21050933  |
| Mug-ps1 17835       | -1.290061819 | 0.152244448 | -1.290061819 | 0.152244448 |
| Aasdh 231326        | -1.29013306  | 0.171878357 | -1.29013306  | 0.171878357 |
| Slc16a11 216867     | -1.290168587 | 0.056130361 | -1.24230949  | 0.096946554 |
| Suox 211389         | -1.290237418 | 0.017216742 | -1.231740341 | 0.006524208 |
| 0610009020Rik 66839 | -1.290292437 | 0.0053904   | -1.353713337 | 0.000549224 |
| Parp3 235587        | -1.290430344 | 0.065096107 | -1.163679848 | 0.13298124  |
| Magi1 14924         | -1.290662628 | 0.107325223 | -1.412801481 | 0.06245985  |
| Lrrc45 217366       | -1.290882084 | 0.196251845 | -1.290882084 | 0.196251845 |
| Nucb2 53322         | -1.290986773 | 0.234365841 | -1.155510718 | 0.324649379 |
| Rcor3 214742        | -1.291174086 | 0.314664867 | 1.098435614  | 0.42957084  |
| Oaf 102644          | -1.291331472 | 0.046972402 | -1.405024793 | 0.004163112 |
| Ranbp3 71810        | -1.291331695 | 0.002762792 | -1.407682089 | 8.88661E-05 |
| Tmem170b 621976     | -1.291461638 | 0.254501954 | -1.328361266 | 0.144238545 |
| St3gal2 20444       | -1.291545076 | 0.16495238  | 1.020271606  | 0.458277338 |
| Slc30a5 69048       | -1.291569275 | 0.150536077 | -1.505633719 | 0.058598461 |

|                     |              |             |              |             |
|---------------------|--------------|-------------|--------------|-------------|
| Rufy3 52822         | -1.291639035 | 0.026972811 | -1.183244454 | 0.031350354 |
| Tead3 21678         | -1.291694443 | 0.096251562 | -1.333693242 | 0.029295327 |
| Armcx1 78248        | -1.291737736 | 0.340731572 | -1.812670781 | 0.149215492 |
| Prosapip1 241638    | -1.292014251 | 0.053350593 | -1.392328863 | 0.026658384 |
| Gas2l1 78926        | -1.292108382 | 0.0119477   | -1.163856988 | 0.038442017 |
| Ap4e1 108011        | -1.292224937 | 0.038859758 | -1.292224937 | 0.038859758 |
| H6pd 100198         | -1.292236711 | 0.006716544 | -1.343100444 | 0.002352757 |
| Erccl1 13870        | -1.292567718 | 0.111635514 | -1.130658627 | 0.234990332 |
| Slc16a2 20502       | -1.292792702 | 0.117390453 | -1.468438669 | 0.046312326 |
| Sh3bp2 24055        | -1.292919187 | 0.089285902 | -1.129916349 | 0.184294288 |
| Fads1 76267         | -1.293600657 | 0.029478785 | -1.142211276 | 0.105975515 |
| Narfl 67563         | -1.293889331 | 0.014773344 | -1.293889331 | 0.014773344 |
| Fam114a1 68303      | -1.294209876 | 0.071795963 | -1.060205296 | 0.281459762 |
| Camkk2 207565       | -1.294569641 | 0.104562469 | -1.137417279 | 0.218953116 |
| lqgap2 544963       | -1.294586176 | 0.126009944 | -1.481496151 | 0.049488316 |
| Cenpv 73139         | -1.294890418 | 0.077579352 | -1.294890418 | 0.077579352 |
| Pnlcd1 240023       | -1.295039914 | 0.281292145 | 1.014081713  | 0.48730269  |
| Akap7 432442        | -1.295056637 | 0.24562846  | -1.429171332 | 0.173111149 |
| Mast2 17776         | -1.295061853 | 0.011740925 | -1.218369975 | 0.01741078  |
| Spag9 70834         | -1.295123107 | 0.183067842 | -1.295123107 | 0.183067842 |
| 2810417H13Rik 68026 | -1.295144696 | 0.371596936 | 1.525170402  | 0.307810225 |
| Hgfac 54426         | -1.295307235 | 0.017784585 | -1.392572256 | 0.000446046 |
| Gorasp1 74498       | -1.295408352 | 0.044319335 | -1.15812147  | 0.076277403 |
| Tmem43 74122        | -1.295433231 | 0.062362465 | -1.066755292 | 0.229771882 |
| Zc3h4 330474        | -1.295453043 | 0.197929685 | -1.140279174 | 0.262332334 |
| Tnxb 81877          | -1.295543178 | 0.20738664  | -1.060850559 | 0.417304067 |
| Tmpo 21917          | -1.295836984 | 0.160764412 | -1.341957674 | 0.105211694 |
| Zfp236 329002       | -1.2959394   | 0.167115909 | 1.034447784  | 0.42498728  |
| Golgb1 224139       | -1.296008369 | 0.104133769 | -1.149266599 | 0.215776323 |
| Pawr 114774         | -1.296042003 | 0.299546684 | 1.04739355   | 0.462720466 |
| Sp6 83395           | -1.29609618  | 0.387020615 | -2.8         | 0.173296754 |
| Fam71f2 245884      | -1.29609618  | 0.387020615 | -2.8         | 0.173296754 |
| Tulp4 68842         | -1.296128992 | 0.013325465 | -1.369000425 | 0.000405313 |
| Tspan18 241556      | -1.296344411 | 0.006500205 | -1.376048806 | 0.001473394 |
| Mtap4 17758         | -1.296494147 | 0.073280561 | -1.223607123 | 0.130525136 |
| Cdc42bpb 217866     | -1.296680766 | 0.024394972 | -1.201372638 | 5.82413E-05 |
| Vezt 215008         | -1.296900902 | 0.101780064 | -1.414363037 | 0.036011726 |
| Pdp2 382051         | -1.296961907 | 0.228640621 | -1.562182922 | 0.125744522 |
| Psd 73728           | -1.29704201  | 0.318205793 | -1.202794778 | 0.362818418 |
| Fgd2 26382          | -1.297048146 | 0.309831181 | -2.93946282  | 0.002632129 |
| Prkx 19108          | -1.297294417 | 0.319195577 | -1.810938157 | 0.179641039 |
| Emr1 13733          | -1.297451242 | 0.200958723 | -1.759204033 | 0.021764279 |
| Ntn3 18209          | -1.297679048 | 0.160913998 | -1.297679048 | 0.160913998 |
| Rin3 217835         | -1.297707895 | 0.014044854 | -1.297707895 | 0.014044854 |
| Tmem42 66079        | -1.297771942 | 0.080165156 | -1.175243509 | 0.164239834 |
| Rgs12 71729         | -1.297902841 | 0.133952726 | -1.537397869 | 0.035508868 |
| Atn1 13498          | -1.297986095 | 0.010984181 | -1.28306035  | 0.003561104 |
| Ces3a 382053        | -1.29808818  | 0.042863836 | -1.29808818  | 0.042863836 |
| Fermt3 108101       | -1.298146918 | 0.089811989 | -1.164785034 | 0.179691919 |
| Slc22a4 30805       | -1.29817336  | 0.203320087 | -1.673731248 | 0.051789717 |
| Amt 434437          | -1.298195394 | 0.141957229 | -1.151149805 | 0.273489459 |
| Fastkd1 320720      | -1.298228874 | 0.141709158 | -1.123031915 | 0.292283559 |
| Wdr37 207615        | -1.298304168 | 0.168258965 | -1.109264953 | 0.336835    |

|                     |              |             |              |             |
|---------------------|--------------|-------------|--------------|-------------|
| Igsf5 72058         | -1.298332503 | 0.043026579 | -1.099122329 | 0.119211836 |
| Ptpn6 15170         | -1.298377839 | 0.012983323 | -1.298377839 | 0.012983323 |
| Gm14378 100044509   | -1.298416031 | 0.095689896 | -1.512036985 | 0.017040247 |
| Fzd5 14367          | -1.29843466  | 0.222476261 | -1.070400909 | 0.417792176 |
| Gas1 14451          | -1.298757863 | 0.163156869 | -1.298757863 | 0.163156869 |
| A4galt 239559       | -1.298834574 | 0.393066013 | 2.519565727  | 0.185597322 |
| Hcfc1 15161         | -1.298872458 | 0.171545677 | -1.059531942 | 0.386644388 |
| Leng8 232798        | -1.298919942 | 0.049484918 | -1.409214535 | 0.007032881 |
| Crispld2 78892      | -1.298937921 | 0.333030723 | -1.782833453 | 0.139483127 |
| Slc35a3 229782      | -1.298948043 | 0.256112771 | -1.120033773 | 0.265070731 |
| Khdrbs3 13992       | -1.299039874 | 0.053089126 | -1.372455149 | 0.026662922 |
| Morn4 226123        | -1.299159564 | 0.368681317 | 1.282318471  | 0.390467519 |
| Itch 16396          | -1.29926892  | 0.128422314 | -1.244549619 | 0.101902276 |
| Nes 18008           | -1.299425099 | 0.220384009 | -1.934088868 | 0.010762149 |
| Pxk 218699          | -1.299427151 | 0.102278415 | -1.284848015 | 0.03695481  |
| Tmem136 235300      | -1.299446989 | 0.302470924 | -1.299446989 | 0.302470924 |
| Mtcp1 17763         | -1.299559803 | 0.197998638 | -1.309978448 | 0.151545805 |
| Hdhd3 72748         | -1.299779204 | 0.051206493 | -1.199774585 | 0.104138162 |
| Nckipsd 80987       | -1.299860538 | 0.041823039 | -1.363703863 | 0.023124746 |
| Tti1 75425          | -1.300062788 | 0.036838226 | -1.234868198 | 0.013548533 |
| Coq3 230027         | -1.300094888 | 0.078602501 | -1.40235975  | 0.028916163 |
| Tmem86b 68255       | -1.300110554 | 0.004340278 | -1.306703142 | 0.001235523 |
| Pdha1 18597         | -1.300342035 | 0.178613703 | -1.181051282 | 0.277653933 |
| Igsf6 80719         | -1.300412527 | 0.132688391 | -1.176540257 | 0.19500847  |
| Gtf3c5 70239        | -1.300449013 | 0.092392272 | -1.44018084  | 0.016389193 |
| Slc50a1 19729       | -1.300534824 | 0.075569025 | -1.418634017 | 0.017679521 |
| Fam98a 72722        | -1.300570923 | 0.102777434 | -1.300570923 | 0.102777434 |
| Naip6 17952         | -1.300704063 | 0.286436963 | -1.300704063 | 0.286436963 |
| Sox6 20679          | -1.300871664 | 0.233433739 | -1.882976437 | 0.027477692 |
| Tmem214 68796       | -1.30094609  | 0.030177097 | -1.30094609  | 0.030177097 |
| Zyx 22793           | -1.301068025 | 0.011760242 | -1.278410065 | 0.003700632 |
| Malat1 72289        | -1.301126835 | 0.040634472 | -1.270490757 | 0.022786373 |
| Fbxo45 268882       | -1.301752955 | 0.159625125 | -1.431950576 | 0.081214992 |
| Gm12070 654472      | -1.30176062  | 0.052234263 | -1.519241561 | 0.001958216 |
| Pprc1 226169        | -1.301840933 | 0.059921211 | -1.301840933 | 0.059921211 |
| Lpin3 64899         | -1.301873424 | 0.193327782 | -1.606133058 | 0.069932014 |
| Rpusd2 271842       | -1.302017322 | 0.122212234 | -1.085879602 | 0.263378787 |
| Arhgap22 239027     | -1.3020638   | 0.305380249 | -1.3020638   | 0.305380249 |
| Glb1 12091          | -1.302133132 | 0.037285992 | -1.506873775 | 0.001330264 |
| Trappc9 76510       | -1.302157704 | 0.047648806 | -1.302157704 | 0.047648806 |
| St6galnac4 20448    | -1.302218235 | 0.253563206 | -1.899568551 | 0.051177499 |
| Impad1 242291       | -1.302244708 | 0.272316043 | 1.015622143  | 0.485109989 |
| 2410004B18Rik 66421 | -1.30233908  | 0.203626031 | -1.574280954 | 0.095435235 |
| Ep300 328572        | -1.302399299 | 0.260546239 | -1.090894033 | 0.405006561 |
| Golga4 54214        | -1.302416244 | 0.050578228 | -1.116173694 | 0.144363277 |
| Asb13 142688        | -1.30254436  | 0.081396321 | -1.492726348 | 0.016766913 |
| Abcc5 27416         | -1.302578927 | 0.208502691 | -1.644310281 | 0.073390816 |
| Zfp407 240476       | -1.302683215 | 0.162581105 | -1.302683215 | 0.162581105 |
| Usp54 78787         | -1.302754174 | 0.273736059 | -2.113363075 | 0.033792786 |
| Cgn1 68178          | -1.302801285 | 0.184844262 | 1.003120723  | 0.489257758 |
| Ubt1 226122         | -1.302845623 | 0.103672966 | -1.64967142  | 0.003372997 |
| Copg2 54160         | -1.302861356 | 0.114867594 | -1.536178691 | 0.024902414 |
| Mapkap1 227743      | -1.303081385 | 0.015860723 | -1.410506579 | 0.00276574  |

|                         |              |             |              |             |
|-------------------------|--------------|-------------|--------------|-------------|
| Rara 19401              | -1.303300915 | 0.155709118 | -1.279850464 | 0.132731808 |
| Tsc2 22084              | -1.303307636 | 0.021826227 | -1.303307636 | 0.021826227 |
| Hipk3 15259             | -1.30334123  | 0.195427099 | -1.115637093 | 0.300701507 |
| Sh2b2 23921             | -1.30336992  | 0.226597998 | -1.30336992  | 0.226597998 |
| Igfbp5 16011            | -1.303487002 | 0.201930174 | -1.140039419 | 0.344985192 |
| 1600014C10Rik 72244     | -1.303530558 | 0.000322513 | -1.225063919 | 0.000455732 |
| BC021891 234878         | -1.303844422 | 0.115713358 | -1.505200267 | 0.037961535 |
| 1810037117Rik 67704     | -1.303991091 | 0.035471718 | -1.454902671 | 0.004041716 |
| Slc38a7 234595          | -1.30415098  | 0.010964538 | -1.30415098  | 0.010964538 |
| Sdc3 20970              | -1.304481965 | 0.060572367 | -1.070427949 | 0.218498375 |
| Uck1 22245              | -1.304582028 | 0.033244918 | -1.188938179 | 0.063366944 |
| Acad12 338350           | -1.304664451 | 0.169775052 | -1.402917865 | 0.118327852 |
| 1810012P15Rik 66274     | -1.304681948 | 0.177311834 | -1.292196353 | 0.126559069 |
| Usp8 84092              | -1.30484534  | 0.231132852 | -1.383893861 | 0.100217448 |
| Fndc3a 319448           | -1.304964318 | 0.250853036 | -1.19917475  | 0.305615277 |
| Gimap9 317758           | -1.305151633 | 0.147896925 | -1.166744194 | 0.2722524   |
| Prdx6 11758             | -1.305186428 | 0.000045104 | -1.27240578  | 3.57738E-05 |
| Hn1 52009               | -1.305248322 | 0.12379952  | -1.214310951 | 0.148458354 |
| Fam175b 109359          | -1.305809929 | 0.082713796 | -1.439493316 | 0.039470254 |
| Exoc7 53413             | -1.305916293 | 0.056649347 | -1.093663777 | 0.18511658  |
| Scx 20289               | -1.306007307 | 0.337265607 | -2.697116162 | 0.079573611 |
| Cntd1 68107             | -1.306315061 | 0.4068475   | 1            | #DIV/0!     |
| Skiv2l2 72198           | -1.306397902 | 0.200436955 | -1.100007872 | 0.377728372 |
| Rfk 54391               | -1.306501952 | 0.088848626 | -1.444846858 | 0.012314149 |
| Zfp62 22720             | -1.306529507 | 0.24629791  | -1.306529507 | 0.24629791  |
| Kctd1 106931            | -1.306592672 | 0.283862383 | -1.306592672 | 0.283862383 |
| Phf20 228829            | -1.306687812 | 0.173019652 | -1.306687812 | 0.173019652 |
| Dennd2a 209773          | -1.306783274 | 0.203549864 | -1.196295187 | 0.30542669  |
| Jakmip1 76071           | -1.306857348 | 0.348445103 | -2.334383838 | 0.154268948 |
| Stambp 70527            | -1.306857561 | 0.094998295 | -1.147815588 | 0.197114879 |
| Aldh3b1 67689           | -1.306873054 | 0.257698173 | 1.013435437  | 0.485617696 |
| Heg1 77446              | -1.306981061 | 0.245790433 | -1.040551032 | 0.445263447 |
| Tab1 66513              | -1.307066717 | 0.107768151 | -1.187843573 | 0.208007413 |
| Alg14 66789             | -1.307334476 | 0.081000366 | -1.631926658 | 0.001994607 |
| Raph1 77300             | -1.307347294 | 0.053400728 | -1.193675294 | 0.106973003 |
| BC065397 436230         | -1.307395982 | 0.273399285 | -1.546413196 | 0.14054864  |
| Tubb6 67951             | -1.307457031 | 0.089967359 | -1.307457031 | 0.089967359 |
| Slc9a1 20544            | -1.307479567 | 0.014340637 | -1.484833899 | 6.45233E-05 |
| Gp1ba 14723             | -1.307544191 | 0.212285004 | -1.983971066 | 0.01169902  |
| Sh2d2a 27371            | -1.307616752 | 0.131637474 | -1.42938014  | 0.090574014 |
| 2610528E23Rik 66497     | -1.307732137 | 0.132207594 | -1.012446008 | 0.471388975 |
| Mup7 100041658          | -1.307750569 | 0.307535811 | -1.969919324 | 0.13183592  |
| Armc9 78795             | -1.307845463 | 0.096848692 | -1.243978493 | 0.161982127 |
| Rassf5 54354            | -1.307853421 | 0.12473306  | -1.55962021  | 0.027808456 |
| 1110034A24Rik 109065    | -1.307900063 | 0.282621425 | -2.272544879 | 0.026134045 |
| Slc6a7 240332           | -1.308151617 | 0.363999082 | -2.114794391 | 0.165608225 |
| 4632428C04Rik 100043102 | -1.308200826 | 0.299723657 | -1.832456006 | 0.096192173 |
| Onecut2 225631          | -1.308353217 | 0.085832281 | -1.224816204 | 0.018385788 |
| Def6 23853              | -1.308528456 | 0.220348217 | -1.154907584 | 0.327170965 |
| Matr3 17184             | -1.308705164 | 0.10525333  | -1.167522203 | 0.213884313 |
| Gclm 14630              | -1.30874859  | 0.03535939  | -1.403244544 | 0.017419906 |
| Dak 225913              | -1.309048759 | 0.031965008 | -1.226460092 | 0.008272014 |
| Pola2 18969             | -1.309049487 | 0.137438384 | -1.309049487 | 0.137438384 |



|                      |              |             |              |             |
|----------------------|--------------|-------------|--------------|-------------|
| Sars2 71984          | -1.309058437 | 0.100152904 | -1.249446306 | 0.102728317 |
| 1110031I02Rik 66179  | -1.309183725 | 0.11657007  | -1.446643369 | 0.068786843 |
| Magohb 66441         | -1.309490667 | 0.387136555 | 2.800934524  | 0.110689841 |
| Exoc1 69940          | -1.309525612 | 0.160825914 | -1.460592319 | 0.106172991 |
| Bmp6 12161           | -1.309584334 | 0.254982113 | -1.032284995 | 0.468415712 |
| Otpn 71648           | -1.309598986 | 0.056094966 | -1.216566858 | 0.114071597 |
| Pnpla6 50767         | -1.309883272 | 0.012498917 | -1.239139744 | 0.026665569 |
| Rab3il1 74760        | -1.309962517 | 0.129768605 | -1.291322424 | 0.044178861 |
| Lpgat1 226856        | -1.310022799 | 0.021936307 | -1.142591751 | 0.038531801 |
| Pgm2l1 70974         | -1.310254315 | 0.294528519 | 1.13347832   | 0.385399825 |
| Lims1 110829         | -1.310360088 | 0.194739622 | -1.310360088 | 0.194739622 |
| Gbp11 634650         | -1.31059586  | 0.290701317 | 1.369223895  | 0.169323377 |
| Acad9 229211         | -1.310599489 | 0.057729361 | -1.10916905  | 0.207761005 |
| Hamp2 66438          | -1.310671605 | 0.291165332 | -2.915726784 | 0.000580835 |
| Tcf7 21414           | -1.31068716  | 0.086628336 | -1.062574693 | 0.326074589 |
| Spp1 20750           | -1.310784583 | 0.043366103 | -1.108360439 | 0.11508405  |
| Tsc1 64930           | -1.310945117 | 0.114655311 | -1.636544154 | 0.0028514   |
| G630016D24Rik 619301 | -1.310977809 | 0.375459435 | -6.42165     | 0.04426109  |
| Fbxl5 242960         | -1.311005654 | 0.12453411  | -1.511156046 | 0.048713932 |
| Crim1 50766          | -1.311093043 | 0.162572861 | -1.11181505  | 0.33191547  |
| Ubp1 22221           | -1.311112627 | 0.125374079 | -1.246766668 | 0.121165368 |
| Ptpre 19267          | -1.311136112 | 0.286353663 | -1.000852445 | 0.499310665 |
| Topbp1 235559        | -1.31117326  | 0.144196764 | -1.128516511 | 0.295766973 |
| Fubp1 51886          | -1.311192493 | 0.209207283 | -1.311192493 | 0.209207283 |
| Agk 69923            | -1.311261738 | 0.148596186 | -1.659621294 | 0.017404803 |
| Gpr18 110168         | -1.311364959 | 0.382214599 | -2.8202      | 0.173296754 |
| Taf3 209361          | -1.311424961 | 0.020299432 | -1.310140077 | 0.001307936 |
| Wdr19 213081         | -1.311539514 | 0.317198745 | -2.131170548 | 0.122194279 |
| Rfx2 19725           | -1.311576752 | 0.24933893  | -2.088144357 | 0.015541816 |
| Rap1gap 110351       | -1.311629231 | 0.109586325 | -1.321212634 | 0.082245881 |
| Gna11 14672          | -1.311991695 | 0.00188263  | -1.258536915 | 0.000404442 |
| Slk 20874            | -1.312116034 | 0.100367623 | -1.171128804 | 0.204826545 |
| BC023829 236848      | -1.31232758  | 0.038141792 | -1.144131761 | 0.11777293  |
| Aifm1 26926          | -1.312438114 | 0.013326813 | -1.245609411 | 0.026778961 |
| Trim41 211007        | -1.312441973 | 0.033222859 | -1.28715113  | 0.013777641 |
| Mll5 69188           | -1.312477127 | 0.216818607 | -1.185336836 | 0.273559797 |
| Soat2 223920         | -1.312540171 | 0.040740502 | -1.427019763 | 0.015914306 |
| Lphn2 99633          | -1.312555292 | 0.138507939 | 1.007686313  | 0.472012011 |
| Zmiz2 52915          | -1.312565508 | 0.003132474 | -1.379055865 | 0.001074174 |
| Tmem125 230678       | -1.312851949 | 0.035548517 | -1.384706745 | 0.025102144 |
| Nr1h5 381463         | -1.313017779 | 0.20841633  | -1.449577544 | 0.102137561 |
| Vpreb3 22364         | -1.31315117  | 0.372374696 | -2.942539542 | 0.131712047 |
| 4933427D14Rik 74477  | -1.313421604 | 0.253950347 | -1.313421604 | 0.253950347 |
| Ppm1f 68606          | -1.313503858 | 0.11424858  | -1.037114991 | 0.412860034 |
| Afp 11576            | -1.313595679 | 0.318844312 | 1.218606246  | 0.353137859 |
| Ddx17 67040          | -1.313626255 | 0.127521386 | -1.040027867 | 0.35535759  |
| Tm7sf2 73166         | -1.313652051 | 0.041152186 | -1.456329598 | 0.000241616 |
| Gapvd1 66691         | -1.313899132 | 0.222241235 | -1.194831199 | 0.293610554 |
| Hcn3 15168           | -1.313939614 | 0.135843154 | -1.488465624 | 0.071507855 |
| Ccdc157 216516       | -1.314084215 | 0.058102909 | -1.314084215 | 0.058102909 |
| 2900026A02Rik 243219 | -1.314175823 | 0.085173278 | -1.150970451 | 0.171322303 |
| Npr1 18160           | -1.314216434 | 0.082402477 | -1.169567714 | 0.169260151 |
| Nr1h2 22260          | -1.314309847 | 0.023553724 | -1.314309847 | 0.023553724 |

|                      |              |             |              |             |
|----------------------|--------------|-------------|--------------|-------------|
| D730039F16Rik 77996  | -1.314375572 | 0.001578579 | -1.375279193 | 0.000524056 |
| 2610015P09Rik 212153 | -1.314659423 | 0.22614742  | 1.132162252  | 0.322541384 |
| 2810055F11Rik 67217  | -1.314817605 | 0.038680422 | -1.13328963  | 0.134939413 |
| 2310042D19Rik 74183  | -1.314986529 | 0.297923016 | -1.314986529 | 0.297923016 |
| Abl1 11350           | -1.315116932 | 0.08867089  | -1.231394224 | 0.161696413 |
| C3 12266             | -1.315160498 | 0.023604426 | -1.3767233   | 0.003562921 |
| Osbp2 228983         | -1.315414297 | 0.004464033 | -1.315414297 | 0.004464033 |
| Pld4 104759          | -1.315455559 | 0.137928909 | -1.48059525  | 0.038302405 |
| Phkb 102093          | -1.3157904   | 0.151115811 | -1.592699615 | 0.04458858  |
| Fam43a 224093        | -1.315891418 | 0.116931885 | -1.538173481 | 0.035319849 |
| Pldn 18457           | -1.315963939 | 0.140862923 | -1.007011774 | 0.485148919 |
| Ceacam18 72431       | -1.315979476 | 0.373894521 | -6.44615     | 0.04497135  |
| Bdnf 12064           | -1.31602366  | 0.39920484  | 1            | #DIV/0!     |
| Immp2l 93757         | -1.316349878 | 0.087980104 | -1.30103008  | 0.07626039  |
| Cept1 99712          | -1.316399589 | 0.040070915 | -1.3096622   | 0.010671412 |
| Zbed4 223773         | -1.316511437 | 0.345347049 | 1.284432703  | 0.311544108 |
| Nek4 23955           | -1.316699113 | 0.269678944 | -1.531102273 | 0.140266256 |
| Rsp3a 66832          | -1.316791834 | 0.133342872 | -1.731282252 | 0.010967572 |
| Gimap4 107526        | -1.316982862 | 0.109850724 | -1.210032277 | 0.202227924 |
| Rab11fip1 75767      | -1.317018524 | 0.014640405 | -1.244025695 | 0.031362082 |
| Pias3 229615         | -1.317035489 | 0.155461902 | -1.104118676 | 0.330049567 |
| 2410076I21Rik 73673  | -1.317048596 | 0.294589062 | 1.022181134  | 0.483313319 |
| Cstf2t 83410         | -1.317097709 | 0.122853913 | -1.020350854 | 0.449765107 |
| Amot 27494           | -1.31714343  | 0.25623615  | -1.732569535 | 0.120185515 |
| Mup15 100039150      | -1.317309738 | 0.277488925 | -1.098173927 | 0.414607627 |
| Gsta1 14857          | -1.317346061 | 0.35984882  | -1.317346061 | 0.35984882  |
| Gpr146 80290         | -1.317382493 | 0.002994015 | -1.202642197 | 0.003823197 |
| Pbld1 68371          | -1.317507199 | 0.000288409 | -1.237218098 | 0.000251031 |
| Slc25a19 67283       | -1.317646886 | 0.007406115 | -1.351328972 | 0.008158154 |
| Ptger2 19217         | -1.317844946 | 0.280333344 | -2.073848937 | 0.070345111 |
| 2210417A02Rik 70138  | -1.318091179 | 0.371956267 | -1.117471429 | 0.447113135 |
| Phf20l1 239510       | -1.318187816 | 0.276540898 | 1.151945641  | 0.326913403 |
| Efcab2 68226         | -1.318236518 | 0.297872061 | -1.183374847 | 0.36069788  |
| Arl5b 75869          | -1.318451573 | 0.317671918 | 1.28704839   | 0.295280851 |
| Yaf2 67057           | -1.318550427 | 0.098078868 | -1.456524047 | 0.054072487 |
| Timm17b 21855        | -1.318558157 | 0.029726044 | -1.318558157 | 0.029726044 |
| Zcchc14 142682       | -1.31868255  | 0.139533774 | -1.097916635 | 0.307152306 |
| Abcc6 27421          | -1.318703296 | 0.00630505  | -1.189291641 | 0.016701648 |
| Pom121 107939        | -1.31891148  | 0.259396197 | -1.211924439 | 0.309970143 |
| Pdk1 228026          | -1.318968334 | 0.123638541 | -1.158940033 | 0.237814303 |
| Paox 212503          | -1.319028824 | 0.02662753  | -1.150644111 | 0.098576666 |
| Sec22c 215474        | -1.319034201 | 0.010928072 | -1.498335914 | 0.000141799 |
| Ftl2 14337           | -1.319079939 | 0.083136141 | -1.47096178  | 0.035781471 |
| Kif5a 16572          | -1.319214725 | 0.147875255 | -1.104063473 | 0.305835527 |
| Ccdc45 320162        | -1.319391354 | 0.066799329 | -1.319391354 | 0.066799329 |
| E2f7 52679           | -1.319415996 | 0.372645112 | -6.462983333 | 0.044795474 |
| Zbtb5 230119         | -1.31984101  | 0.005138303 | -1.385948957 | 0.002408339 |
| Klh12 240756         | -1.319971935 | 0.17495225  | -1.483048105 | 0.078250761 |
| Pdap1 231887         | -1.320065538 | 0.015217803 | -1.320065538 | 0.015217803 |
| Zfp429 72807         | -1.320213411 | 0.344840544 | -2.344773177 | 0.157931685 |
| Kifc5b 16580         | -1.320245596 | 0.376538721 | -7.662133333 | 0.044268711 |
| Camk1d 227541        | -1.320492905 | 0.208782007 | -1.62264234  | 0.099218391 |
| Ddx23 74351          | -1.320590638 | 0.015050451 | -1.320590638 | 0.015050451 |

|                      |              |             |              |             |
|----------------------|--------------|-------------|--------------|-------------|
| Apol9b 71898         | -1.320682791 | 0.165770042 | -1.594762941 | 0.002006612 |
| E2f6 50496           | -1.320713681 | 0.040563013 | -1.593449504 | 0.000177822 |
| Gm5918 546143        | -1.320841744 | 0.086650918 | -1.43776906  | 0.030463476 |
| Wiz 22404            | -1.32097398  | 0.010785823 | -1.32097398  | 0.010785823 |
| Tex2 21763           | -1.320990791 | 0.135738534 | -1.320990791 | 0.135738534 |
| Ugt1a1 394436        | -1.321044557 | 0.029042668 | -1.194976616 | 0.050481436 |
| Pot1b 72836          | -1.321125352 | 0.200476114 | -1.461760061 | 0.123907526 |
| Zfp518a 72672        | -1.321137394 | 0.270887033 | 1.047712117  | 0.454726263 |
| Zfp623 78834         | -1.321319296 | 0.008811293 | -1.381414097 | 0.005809153 |
| Morn2 378462         | -1.321419624 | 0.189007164 | -1.321419624 | 0.189007164 |
| Nsg2 18197           | -1.321603493 | 0.381581988 | -2.8         | 0.173296754 |
| Prr11 270906         | -1.321603493 | 0.381581988 | -2.8         | 0.173296754 |
| Tmem40 94346         | -1.321603493 | 0.381581988 | -2.8         | 0.173296754 |
| Pcdhb20 93891        | -1.321603493 | 0.381581988 | -2.8         | 0.173296754 |
| Abhd14b 76491        | -1.321813726 | 0.029571257 | -1.418414896 | 0.01405959  |
| Ap1g2 11766          | -1.322319395 | 0.133173145 | -1.783222978 | 0.00398412  |
| Bbs4 102774          | -1.322325543 | 0.240780936 | 1.12204292   | 0.352864241 |
| Gnas 14683           | -1.32232857  | 0.001227014 | -1.32232857  | 0.001227014 |
| Parp11 101187        | -1.322473311 | 0.154728108 | -1.133235465 | 0.309690858 |
| Unc13c 208898        | -1.322528919 | 0.170447665 | -1.582101652 | 0.073706634 |
| Plxna4 243743        | -1.322588535 | 0.257754241 | -2.415676301 | 0.005248411 |
| Cacnb3 12297         | -1.322730347 | 0.302755016 | 1.10859724   | 0.42157837  |
| Cenpl 70454          | -1.322856648 | 0.267838908 | -1.027634775 | 0.476224776 |
| Fam126a 84652        | -1.322907896 | 0.223365888 | -1.536743424 | 0.078033122 |
| Rhbg 58176           | -1.323084727 | 0.103910142 | -1.238440935 | 0.045805364 |
| Smyd2 226830         | -1.323122195 | 0.03366996  | -1.222513603 | 0.069620902 |
| Crebl2 232430        | -1.323166496 | 0.229240361 | 1.118332682  | 0.356090691 |
| Rabep2 70314         | -1.323214309 | 0.09781138  | -1.323214309 | 0.09781138  |
| 3110070M22Rik 67304  | -1.323289955 | 0.250507445 | -1.652146514 | 0.100586598 |
| Ubr2 224826          | -1.323300448 | 0.040234575 | -1.323300448 | 0.040234575 |
| 6430598A04Rik 243300 | -1.323479792 | 0.218602778 | -1.567061796 | 0.033223292 |
| Pik3r6 104709        | -1.323591814 | 0.330142473 | -2.859502781 | 0.06641704  |
| Lix1l 280411         | -1.323868535 | 0.195053267 | -1.352575892 | 0.164331455 |
| Smc1a 24061          | -1.32409219  | 0.041443012 | -1.129607876 | 0.150220272 |
| BC057079 230393      | -1.324127892 | 0.20173885  | -1.324127892 | 0.20173885  |
| Klhl24 75785         | -1.324456749 | 0.27149353  | -1.136840738 | 0.374982418 |
| Ubl7 69459           | -1.32490404  | 0.016521056 | -1.363454735 | 0.017269752 |
| Coil 12812           | -1.32491097  | 0.261181692 | -1.32491097  | 0.261181692 |
| Degs2 70059          | -1.324964935 | 0.301180797 | -1.324964935 | 0.301180797 |
| Necab1 69352         | -1.325035261 | 0.079565116 | -1.178156625 | 0.163020371 |
| Lgr4 107515          | -1.325157638 | 0.146500017 | -1.325157638 | 0.146500017 |
| Cd200 17470          | -1.325219034 | 0.313124173 | -1.325219034 | 0.313124173 |
| Klk8 259277          | -1.325385609 | 0.340255191 | -3.089363256 | 0.074093315 |
| Nkd1 93960           | -1.325659107 | 0.034418804 | -1.549906182 | 0.002059732 |
| Psma8 73677          | -1.325835117 | 0.38018765  | -2.8202      | 0.173296754 |
| Prkd1 18760          | -1.325835117 | 0.38018765  | -2.8202      | 0.173296754 |
| Spg7 234847          | -1.325967001 | 0.002034781 | -1.368720668 | 0.00173085  |
| Hist1h2bc 68024      | -1.325973278 | 0.02002992  | -1.325973278 | 0.02002992  |
| Map2k5 23938         | -1.326178906 | 0.026731445 | -1.468363327 | 0.004080703 |
| Sema3g 218877        | -1.326374118 | 0.376936656 | -9.39515     | 0.038412663 |
| Dr1 13486            | -1.326727538 | 0.289016874 | -1.208033174 | 0.363297945 |
| Mgll 23945           | -1.327017527 | 0.010567552 | -1.244148988 | 0.021026542 |
| Gnat2 14686          | -1.327048274 | 0.359385975 | 1.266316107  | 0.39603646  |

|                |              |             |              |             |
|----------------|--------------|-------------|--------------|-------------|
| Eno2 13807     | -1.327048274 | 0.359385975 | 1.266316107  | 0.39603646  |
| Ebi3 50498     | -1.327071081 | 0.292408598 | -1.459512442 | 0.2321273   |
| Scfd1 76983    | -1.327089617 | 0.073779465 | -1.620341535 | 0.006357144 |
| Pigr 18703     | -1.327200988 | 0.014712387 | -1.52314159  | 0.000124621 |
| Mocos 68591    | -1.327291997 | 0.046042534 | -1.213115658 | 0.091377618 |
| Nth1 18207     | -1.327363781 | 0.150008073 | -1.795593086 | 0.009123087 |
| Nlk 18099      | -1.327378121 | 0.244490424 | -1.248951504 | 0.138727518 |
| Lpcat1 210992  | -1.327453214 | 0.375381462 | -4.56078     | 0.070574133 |
| Ank1 11733     | -1.327566667 | 0.383751051 | -3.925       | 0.173296754 |
| Suclg2 20917   | -1.327766937 | 0.010957733 | -1.264544706 | 0.024205395 |
| Ces1g 12623    | -1.327770065 | 0.044754732 | -1.118837878 | 0.148729962 |
| Maob 109731    | -1.327976806 | 0.051421877 | -1.377590738 | 0.049592776 |
| Fam82a2 67809  | -1.328239392 | 0.061914169 | -1.097512215 | 0.237900785 |
| H2-Oa 15001    | -1.328587642 | 0.340680717 | -2.287459648 | 0.164128923 |
| Zdhhc5 228136  | -1.32861983  | 0.046648562 | -1.388103075 | 0.013940786 |
| Crebbp 12914   | -1.328691076 | 0.258666804 | -1.204247011 | 0.29243425  |
| Trak1 67095    | -1.328771209 | 0.062511868 | -1.3268566   | 0.034877855 |
| Eepd1 67484    | -1.328821204 | 0.03313564  | -1.361853301 | 0.009351714 |
| Smarca4 20586  | -1.328932059 | 0.006207172 | -1.179734862 | 0.005961482 |
| Dgke 56077     | -1.328940719 | 0.353955329 | 1.523109041  | 0.284366488 |
| Fam76a 230789  | -1.32899241  | 0.064676535 | -1.301047472 | 0.008548424 |
| Ccar1 67500    | -1.32907348  | 0.075286502 | -1.388407071 | 0.02452775  |
| Susd1 634731   | -1.329297505 | 0.169561393 | -1.718171172 | 0.031692902 |
| Pptc7 320717   | -1.32936791  | 0.269892673 | 1.092435633  | 0.406071498 |
| Sap30bp 57230  | -1.32949714  | 0.042973549 | -1.217883645 | 0.085049487 |
| Etl4 208618    | -1.329506379 | 0.223345218 | 1.10875104   | 0.364932735 |
| Tbc1d14 100855 | -1.329511228 | 0.090197093 | -1.187145026 | 0.184654914 |
| Parp4 328417   | -1.329553188 | 0.130097754 | -1.084180985 | 0.28119422  |
| Gstm1 14862    | -1.329719871 | 0.122414607 | -1.372907235 | 0.03728544  |
| Mark4 232944   | -1.33014244  | 0.099757634 | -1.596048201 | 0.01450168  |
| Il15ra 16169   | -1.330154367 | 0.050775302 | -1.438793487 | 0.012344311 |
| Samd8 67630    | -1.330593249 | 0.126219958 | -1.112062004 | 0.273859473 |
| Frm4b 232288   | -1.330622603 | 0.121967136 | -1.336180288 | 0.083432379 |
| Bcl3 12051     | -1.330696066 | 0.07633792  | -1.168427185 | 0.150692846 |
| Hdhd2 76987    | -1.330744718 | 0.025533387 | -1.409978259 | 0.005260259 |
| Prkcb 18751    | -1.330760793 | 0.167176812 | -1.397267097 | 0.086576375 |
| Hc 15139       | -1.330773514 | 0.004998491 | -1.330773514 | 0.004998491 |
| Myo1d 338367   | -1.330925821 | 0.010363138 | -1.413819907 | 0.001039782 |
| Ppapdc2 74411  | -1.331017873 | 0.08563455  | -1.668998335 | 0.003916811 |
| Gcgr 14527     | -1.331218472 | 0.001390434 | -1.434993047 | 6.54951E-05 |
| Slc25a30 67554 | -1.33133916  | 0.274402195 | 1.105780525  | 0.396674352 |
| Adck2 57869    | -1.331345399 | 0.045244709 | -1.331345399 | 0.045244709 |
| Myst3 244349   | -1.331351996 | 0.208669439 | 1.026016111  | 0.445183777 |
| Car2 12349     | -1.331571092 | 0.101081732 | -1.166012989 | 0.203421392 |
| Dnm1l 74006    | -1.331717531 | 0.070491475 | -1.084045224 | 0.250763374 |
| R3hdm2 71750   | -1.332010053 | 0.00850282  | -1.418281536 | 0.002915319 |
| Dennd4b 229541 | -1.33215899  | 0.242446982 | -1.528539075 | 0.138817309 |
| Snx18 170625   | -1.332189989 | 0.063942165 | -1.332189989 | 0.063942165 |
| Ino80c 225280  | -1.332376935 | 0.09986168  | -1.161005302 | 0.208185589 |
| Pgm5 226041    | -1.332747121 | 0.268154581 | -1.244866503 | 0.30241805  |
| Stxbp6 217517  | -1.332832099 | 0.064728896 | -1.488270106 | 0.023633113 |
| Hcls1 15163    | -1.333230574 | 0.090074618 | -1.333230574 | 0.090074618 |
| Mx1 17857      | -1.333432453 | 0.342706022 | -3.943418182 | 0.013288051 |

|                      |              |             |              |             |
|----------------------|--------------|-------------|--------------|-------------|
| Tle3 21887           | -1.33347032  | 0.06353116  | -1.07367455  | 0.237246147 |
| Nbas 71169           | -1.333514823 | 0.035905522 | -1.333514823 | 0.035905522 |
| Tmem220 338369       | -1.333645761 | 0.211194061 | -1.333645761 | 0.211194061 |
| Cd300lg 52685        | -1.333896044 | 0.017807324 | -1.377349315 | 0.01401513  |
| Pxmp2 19301          | -1.333947135 | 0.004635243 | -1.407297681 | 0.000366519 |
| Fbxo21 231670        | -1.334224355 | 0.060323208 | -1.334224355 | 0.060323208 |
| Zfp963 620419        | -1.334388852 | 0.113462561 | -1.492052511 | 0.029704813 |
| 8030462N17Rik 212163 | -1.334421912 | 0.29931595  | -2.065116859 | 0.1236989   |
| Cphx 105594          | -1.334585635 | 0.357217834 | 1.469092247  | 0.321394913 |
| Vgll4 232334         | -1.334957486 | 0.284696954 | -1.522916469 | 0.157754153 |
| Xrcc6bp1 68876       | -1.33508279  | 0.209100753 | -1.336592672 | 0.092336591 |
| Nek9 217718          | -1.335203997 | 0.005114041 | -1.255692005 | 0.009029527 |
| Mmp19 58223          | -1.335276828 | 0.075580411 | -1.160434891 | 0.14014469  |
| Aoc3 11754           | -1.335355238 | 0.384009973 | -1.906558976 | 0.209895125 |
| Tef 21685            | -1.335475113 | 0.022106837 | -1.418138115 | 0.005884095 |
| 2810403A07Rik 74200  | -1.335573567 | 0.129798709 | -1.335573567 | 0.129798709 |
| Bahcc1 268515        | -1.335846429 | 0.183696801 | -1.051710481 | 0.415956888 |
| Clcn7 26373          | -1.335943244 | 0.106283486 | -1.335943244 | 0.106283486 |
| Ints6 18130          | -1.336089657 | 0.148261308 | -1.139461229 | 0.300952037 |
| Hk3 212032           | -1.336108028 | 0.231476967 | -1.022829383 | 0.474131376 |
| Kdm2a 225876         | -1.336159255 | 0.096371608 | -1.522237374 | 0.038288339 |
| Lgals3 16854         | -1.336176299 | 0.132478998 | -1.191984544 | 0.234654743 |
| Kalrn 545156         | -1.336188404 | 0.119683997 | -1.590435962 | 0.033773166 |
| Glud1 14661          | -1.336302404 | 0.003400112 | -1.290932059 | 0.000564967 |
| Pstpip2 19201        | -1.336325085 | 0.17084267  | -1.634612536 | 0.065945999 |
| Rnf31 268749         | -1.336331321 | 0.016936865 | -1.521817373 | 6.53592E-05 |
| Ssx2ip 99167         | -1.33639393  | 0.154342395 | -1.75855581  | 0.014771034 |
| Flt1 14254           | -1.336482297 | 0.181032996 | -1.083239238 | 0.382768715 |
| Wnk4 69847           | -1.336813789 | 0.134255903 | -1.336813789 | 0.134255903 |
| Klhl38 268807        | -1.336998492 | 0.394181862 | 1            | #DIV/0!     |
| Gm11992 626870       | -1.336998492 | 0.394181862 | 1            | #DIV/0!     |
| Akap6 238161         | -1.336998492 | 0.394181862 | 1            | #DIV/0!     |
| Atxn2l 233871        | -1.337038585 | 0.008669799 | -1.253822684 | 0.017000996 |
| P4hb 18453           | -1.337077772 | 0.002120248 | -1.297847348 | 0.004952255 |
| Hist1h1e 50709       | -1.337091956 | 0.366630241 | -6.549566667 | 0.045145192 |
| Gmfb 63985           | -1.337435428 | 0.19012039  | -1.158471867 | 0.310467534 |
| Ppt1 19063           | -1.337452156 | 0.059213454 | -1.302331869 | 0.002030634 |
| Chrn2 11444          | -1.3374547   | 0.185100075 | -1.3374547   | 0.185100075 |
| Hes6 55927           | -1.33747836  | 0.109339227 | -1.319705876 | 0.084225281 |
| Smug1 71726          | -1.337590268 | 0.243286774 | 1.13705417   | 0.358239726 |
| Uba3 22200           | -1.33776753  | 0.109997415 | -1.33776753  | 0.109997415 |
| She 214547           | -1.338038583 | 0.301169082 | -1.593624653 | 0.143195321 |
| Exosc1 66583         | -1.338176197 | 0.02147379  | -1.158854828 | 0.070847325 |
| Upf3b 68134          | -1.338272843 | 0.159267445 | -1.123930774 | 0.326180969 |
| Spn 56381            | -1.338501081 | 0.130994525 | -1.573884884 | 0.050897272 |
| Ctbp2 13017          | -1.338738827 | 0.323385391 | 1.253162873  | 0.353490254 |
| Fbxo28 67948         | -1.338792618 | 0.131565105 | -1.591378121 | 0.045363097 |
| Vwce 71768           | -1.339018685 | 0.005798974 | -1.259418034 | 0.006452525 |
| Cep68 216543         | -1.339118868 | 0.114544809 | -1.205842837 | 0.218313743 |
| Zfp672 319475        | -1.339257486 | 0.090620411 | -1.244119797 | 0.157464842 |
| Wwc2 52357           | -1.339386058 | 0.160333038 | -1.065780667 | 0.370847115 |
| Mcm3ap 54387         | -1.339800736 | 0.041954335 | -1.239255843 | 0.085840705 |
| Mboat7 77582         | -1.339828193 | 0.015384697 | -1.339828193 | 0.015384697 |

|                      |              |             |              |             |
|----------------------|--------------|-------------|--------------|-------------|
| Gja5 14613           | -1.339888993 | 0.216315192 | -1.635874279 | 0.055989877 |
| Ccm2 216527          | -1.339913283 | 0.039263086 | -1.392719756 | 0.004877383 |
| Suv39h1 20937        | -1.340203924 | 0.133941603 | -1.340203924 | 0.133941603 |
| Cpsf6 432508         | -1.340253692 | 0.109416692 | -1.340253692 | 0.109416692 |
| Agpat2 67512         | -1.340397905 | 0.023607701 | -1.340397905 | 0.023607701 |
| 2410018M08Rik 71970  | -1.340438985 | 0.18795568  | -1.065061106 | 0.407095348 |
| Cryz 12972           | -1.340649147 | 0.021949636 | -1.252696718 | 0.043235125 |
| Nr5a2 26424          | -1.340727944 | 0.233854001 | 1.039906944  | 0.445212708 |
| Cherp 27967          | -1.340800521 | 0.037447826 | -1.121216056 | 0.127981699 |
| Eif4ebp2 13688       | -1.340874332 | 0.209895486 | -1.564581875 | 0.138993006 |
| Cradd 12905          | -1.341696706 | 0.007923981 | -1.282924005 | 0.016782507 |
| Dennd1c 70785        | -1.341927444 | 0.167517676 | -1.213134838 | 0.276021277 |
| Acs1 14081           | -1.342078269 | 0.101303052 | -1.171100405 | 0.210519624 |
| Fnbp4 55935          | -1.342353607 | 0.208307561 | -1.033853749 | 0.454570613 |
| Acr 11434            | -1.342422709 | 0.376959751 | 1.264185714  | 0.40907038  |
| Plxnd1 67784         | -1.342456234 | 0.0080049   | -1.38867251  | 0.000201976 |
| Etnk1 75320          | -1.342707436 | 0.118845355 | -1.221166708 | 0.165350616 |
| Gda 14544            | -1.342711274 | 0.201319083 | -1.017711315 | 0.471696111 |
| Gm6788 627788        | -1.342760622 | 0.204865465 | -1.475933003 | 0.090025341 |
| Fam133b 68152        | -1.342854019 | 0.177586981 | -1.723285139 | 0.049047652 |
| Zfp280b 64453        | -1.342927439 | 0.109070489 | -1.153607231 | 0.22292114  |
| Hoga1 67432          | -1.342943499 | 0.001107108 | -1.407316863 | 0.000081076 |
| Zfp292 30046         | -1.343082609 | 0.177043323 | -1.120424413 | 0.350107265 |
| Lrpap1 16976         | -1.343273047 | 0.001252103 | -1.296928622 | 0.003016666 |
| Khk 16548            | -1.34345156  | 0.056794383 | -1.304230543 | 0.043143579 |
| Zfp422 67255         | -1.343602494 | 0.077131589 | -1.343602494 | 0.077131589 |
| Smpd4 77626          | -1.343625507 | 0.064390695 | -1.198292138 | 0.131467343 |
| Hipk2 15258          | -1.344169483 | 0.074671953 | -1.735543683 | 0.00047452  |
| Pomt1 99011          | -1.344291767 | 0.007939054 | -1.411854583 | 0.002067242 |
| Pkd2 18764           | -1.344331712 | 0.245529103 | 1.08938637   | 0.374043628 |
| 9630033F20Rik 319801 | -1.344424956 | 0.110022251 | -1.344424956 | 0.110022251 |
| Slc35d1 242585       | -1.344558694 | 0.159347344 | -1.093808728 | 0.349362469 |
| Caskin2 140721       | -1.344751725 | 0.057680409 | -1.488685401 | 0.02421375  |
| Adat3 100113398      | -1.344755135 | 0.267160703 | 1.273735929  | 0.243989024 |
| Entpd8 72090         | -1.344837481 | 0.002606586 | -1.344837481 | 0.002606586 |
| AA986860 212439      | -1.344984168 | 0.104852972 | -1.174505864 | 0.215646249 |
| B230206F22Rik 78878  | -1.345025684 | 0.192890209 | -1.340754799 | 0.069009306 |
| Plcb1 18795          | -1.345073603 | 0.259389107 | -1.729054581 | 0.149635913 |
| Zfp185 22673         | -1.345305628 | 0.331957862 | -2.334383838 | 0.154268948 |
| Fcer2a 14128         | -1.345316498 | 0.369516808 | -1.051233705 | 0.480889446 |
| H2-DMb2 15000        | -1.345463362 | 0.374343142 | -1.379436792 | 0.355043416 |
| Mettl15 76894        | -1.345475007 | 0.268539601 | -1.345475007 | 0.268539601 |
| Ifit3 15959          | -1.345906715 | 0.037515181 | -1.29432553  | 0.07192693  |
| Antxr2 71914         | -1.346021247 | 0.090728075 | -1.473885185 | 0.032593974 |
| Agmat 75986          | -1.346130913 | 0.017490504 | -1.31790127  | 0.012133234 |
| Ube2d1 216080        | -1.346186789 | 0.133293188 | -1.346186789 | 0.133293188 |
| Serpind1 15160       | -1.346416139 | 0.005128103 | -1.270941711 | 0.010180795 |
| Ndufaf1 69702        | -1.346441747 | 0.049838979 | -1.217590645 | 0.102023949 |
| Rnf115 67845         | -1.346542962 | 0.162307242 | -1.124357171 | 0.331733448 |
| Orc5 26429           | -1.346690428 | 0.040767141 | -1.197917368 | 0.07648288  |
| Med28 66999          | -1.346757622 | 0.013814019 | -1.23870566  | 0.01243618  |
| Zfp319 79233         | -1.346835424 | 0.10800052  | -1.123734444 | 0.227579614 |
| Dut 110074           | -1.346887114 | 0.071455615 | -1.210309314 | 0.146218672 |

|                      |              |             |              |             |
|----------------------|--------------|-------------|--------------|-------------|
| Cebpa 12606          | -1.346976006 | 0.02635659  | -1.225506668 | 0.037014197 |
| Ptprc 19264          | -1.346979373 | 0.198300628 | -1.126963952 | 0.147920313 |
| Csnk1g2 103236       | -1.34726091  | 0.003332371 | -1.34726091  | 0.003332371 |
| C230035I16Rik 320842 | -1.34780144  | 0.391661509 | 1            | #DIV/0!     |
| 4930519G04Rik 67593  | -1.34780144  | 0.391661509 | 1            | #DIV/0!     |
| Klrb1b 80782         | -1.34780144  | 0.391661509 | 1            | #DIV/0!     |
| Cpn2 71756           | -1.347883479 | 0.001746789 | -1.290500826 | 0.002531694 |
| Golph3 229593        | -1.348016597 | 0.191701864 | -1.635952563 | 0.097622336 |
| Zfp687 78266         | -1.348123422 | 0.029848575 | -1.234209365 | 0.060943441 |
| Elac1 114615         | -1.348164757 | 0.020036831 | -1.238157008 | 0.028225682 |
| Edc3 353190          | -1.348420303 | 0.048227736 | -1.477132732 | 0.022204248 |
| Adipoq 11450         | -1.348555544 | 0.409447926 | 1            | #DIV/0!     |
| Fam178a 226151       | -1.348658833 | 0.136332838 | -1.02645089  | 0.439285908 |
| Cdc45 12544          | -1.348702716 | 0.200233393 | -1.501180715 | 0.123793287 |
| 1810010H24Rik 69066  | -1.348736424 | 0.221179198 | -2.114819753 | 0.013218768 |
| Wdr25 212198         | -1.348741611 | 0.053070944 | -1.090186534 | 0.172388361 |
| Sphk2 56632          | -1.348856953 | 0.001244283 | -1.300222942 | 0.002947643 |
| Atpaf1 230649        | -1.348911999 | 0.13797448  | -1.892530254 | 0.004146658 |
| Ptpn23 104831        | -1.348974548 | 0.000451019 | -1.372806686 | 0.000526848 |
| Irx1 16371           | -1.349019632 | 0.163860993 | -1.349019632 | 0.163860993 |
| Cd300ld 217305       | -1.349070352 | 0.045230256 | -1.364283035 | 0.016474665 |
| Arhgap26 71302       | -1.349300894 | 0.104969615 | -1.126946392 | 0.21034102  |
| Hlx 15284            | -1.349553618 | 0.017385966 | -1.431356272 | 0.004468666 |
| Zfp426 235028        | -1.349801075 | 0.21434975  | 1.156628207  | 0.267821489 |
| Prss36 77613         | -1.349830488 | 0.100830166 | -1.507227102 | 0.028148996 |
| E230029C05Rik 319711 | -1.349911456 | 0.388243206 | -3.9746      | 0.173296754 |
| Nr1i3 12355          | -1.350055558 | 0.006435138 | -1.478899237 | 0.000290984 |
| Med25 75613          | -1.350180131 | 0.016511101 | -1.265617648 | 0.031862831 |
| Fam48a 56790         | -1.350205866 | 0.043295048 | -1.211169058 | 0.086908095 |
| Fbf1 217335          | -1.350356162 | 0.080642738 | -1.196393662 | 0.165672432 |
| Cobra1 58202         | -1.350398608 | 0.011362586 | -1.291248544 | 0.004189617 |
| Ftsj2 68017          | -1.350610196 | 0.095858248 | -1.173508391 | 0.199192278 |
| Ipp 16351            | -1.350676056 | 0.178690678 | -1.350676056 | 0.178690678 |
| Hfe2 69585           | -1.350822138 | 0.014157242 | -1.49575268  | 0.001183003 |
| Akap9 100986         | -1.350846503 | 0.146480908 | -1.000728771 | 0.498268677 |
| Fgfr3 14184          | -1.35085553  | 0.064463413 | -1.224066056 | 0.131708463 |
| Fn3krp 238024        | -1.350924946 | 0.134873179 | -1.536862254 | 0.034808562 |
| Ddx26b 236790        | -1.350925335 | 0.287955466 | 1.061922605  | 0.454450904 |
| Stim2 116873         | -1.350931469 | 0.197793018 | -1.030806705 | 0.453518338 |
| Pvr 52118            | -1.350978781 | 0.131534211 | -1.522044253 | 0.04113575  |
| Zfp189 230162        | -1.351050521 | 0.306274506 | -1.868402147 | 0.188726082 |
| BC017158 233913      | -1.351338592 | 0.01687486  | -1.269737113 | 0.036198531 |
| Brpf3 268936         | -1.351352532 | 0.069550235 | -1.274592759 | 0.120884546 |
| Gm7694 665574        | -1.351474642 | 0.253200348 | -1.464717511 | 0.19287666  |
| Ehbp1 216565         | -1.351510805 | 0.160739023 | -1.866241731 | 0.009858682 |
| Plcd1 18799          | -1.351671391 | 0.233885768 | -1.351671391 | 0.233885768 |
| Fchs1 319262         | -1.351930117 | 0.213452833 | -2.16580548  | 0.015492818 |
| Tmem209 72649        | -1.352240322 | 0.1693354   | -1.352240322 | 0.1693354   |
| Ick 56542            | -1.352471862 | 0.091308435 | -1.394024016 | 0.002347593 |
| Ccdc111 408022       | -1.352490219 | 0.247545134 | -2.239852819 | 0.025496855 |
| Tmem131 56030        | -1.352774532 | 0.059058228 | -1.416964469 | 0.025696171 |
| Crtc1 382056         | -1.352795217 | 0.008966867 | -1.434459282 | 0.001214146 |
| Fam188b 330323       | -1.352858329 | 0.185298438 | -1.722981362 | 0.044657856 |

|                     |              |             |              |             |
|---------------------|--------------|-------------|--------------|-------------|
| Foxj1 15223         | -1.352858382 | 0.352298073 | 1.230375659  | 0.37752335  |
| Lemd3 380664        | -1.352945127 | 0.150105214 | -1.828390172 | 0.008903277 |
| Bzw2 66912          | -1.353159759 | 0.018662125 | -1.413421582 | 0.003598916 |
| Snx22 382083        | -1.353443429 | 0.090676035 | -1.235976011 | 0.164937371 |
| Gstt2 14872         | -1.353524283 | 0.064624261 | -1.498528341 | 0.030698248 |
| Atg7 74244          | -1.353719131 | 0.015630086 | -1.36827828  | 0.005383422 |
| Ift81 12589         | -1.353784957 | 0.228630478 | -1.132709931 | 0.385615835 |
| BC016423 105203     | -1.35385673  | 0.275766949 | 1.098707743  | 0.414293843 |
| Rgl3 71746          | -1.35391588  | 0.000469541 | -1.380408223 | 0.000489225 |
| Mast3 546071        | -1.353926644 | 0.089394671 | -1.223603618 | 0.168191607 |
| Cdr2 12585          | -1.35398064  | 0.285540033 | -1.35398064  | 0.285540033 |
| Racgap1 26934       | -1.353992812 | 0.343682474 | -2.508442186 | 0.166458789 |
| Tjp3 27375          | -1.354012199 | 0.015792587 | -1.270386516 | 0.033827114 |
| Gm12942 100039968   | -1.354068564 | 0.07675085  | -1.354068564 | 0.07675085  |
| Rhoq 104215         | -1.354112948 | 0.267751258 | -1.339642396 | 0.225313806 |
| Eil3 269344         | -1.354225644 | 0.262858912 | -2.303446792 | 0.038448787 |
| Apaf1 11783         | -1.354406892 | 0.132999828 | -1.92953544  | 0.000644602 |
| Gm4926 237749       | -1.354443828 | 0.29025544  | -1.354443828 | 0.29025544  |
| Tapbp1 213233       | -1.35454958  | 0.02514321  | -1.13848528  | 0.057031545 |
| Vipar 104799        | -1.354557992 | 0.056814095 | -1.503428459 | 0.023774299 |
| Hook3 320191        | -1.354651048 | 0.178732306 | -1.164912279 | 0.252258076 |
| Wbp1 22377          | -1.354805744 | 0.011669287 | -1.354805744 | 0.011669287 |
| Lmtk2 231876        | -1.354825564 | 0.078528037 | -1.232130952 | 0.149490845 |
| Polr2a 20020        | -1.354923436 | 0.011097767 | -1.380111949 | 0.000141044 |
| Shpk 74637          | -1.355109201 | 0.012807557 | -1.284641218 | 0.00072607  |
| Gulo 268756         | -1.355117254 | 0.006829872 | -1.349616095 | 0.004335941 |
| Acot6 217700        | -1.355171573 | 0.386914243 | -2.76078     | 0.173296754 |
| Mcp1 244329         | -1.355235317 | 0.142301636 | -1.132375479 | 0.286426842 |
| 1700027D21Rik 76573 | -1.355490213 | 0.287659882 | 1.034232827  | 0.475569282 |
| Dpy19l4 381510      | -1.355559808 | 0.253783749 | -1.001784054 | 0.498341388 |
| Abcg1 11307         | -1.355561083 | 0.03744324  | -1.468429607 | 0.006856434 |
| Mustn1 66175        | -1.355743511 | 0.069678314 | -1.542861238 | 0.02245349  |
| Sqrdl 59010         | -1.355752182 | 0.001512866 | -1.483676774 | 9.39701E-05 |
| Gm8369 666926       | -1.355943524 | 0.307794225 | -1.355943524 | 0.307794225 |
| Mks1 380718         | -1.356279524 | 0.228176968 | -1.356279524 | 0.228176968 |
| Tnrc18 231861       | -1.356869542 | 0.021435915 | -1.367550206 | 0.008813541 |
| Ftsjd1 234728       | -1.357009557 | 0.348005399 | 1.67712829   | 0.222597488 |
| Slc25a21 217593     | -1.357040919 | 0.042033691 | -1.134008215 | 0.104464007 |
| Ntm 235106          | -1.357149171 | 0.306827708 | -1.357149171 | 0.306827708 |
| Ceacam2 26367       | -1.357166634 | 0.230387007 | -2.462930579 | 0.003499089 |
| Fbrsl1 381668       | -1.357208561 | 0.120467445 | -1.601962211 | 0.044724871 |
| Gc 14473            | -1.357341828 | 0.029974818 | -1.566305141 | 0.000734528 |
| Pnp2 667034         | -1.35744614  | 0.030238418 | -1.242659823 | 0.055226126 |
| Naa15 74838         | -1.357450466 | 0.026902558 | -1.427552562 | 0.000536357 |
| Ttr 22139           | -1.357712487 | 0.140131155 | -1.188744542 | 0.135277413 |
| Cnot4 53621         | -1.357904564 | 0.049730031 | -1.357904564 | 0.049730031 |
| Hp 15439            | -1.358056591 | 0.108983424 | -1.358056591 | 0.108983424 |
| Gak 231580          | -1.358225329 | 0.003743152 | -1.322993221 | 0.009024383 |
| Cd2ap 12488         | -1.358494988 | 0.18891759  | -1.009071399 | 0.481253534 |
| Smad4 17128         | -1.358586155 | 0.096878269 | -1.396128548 | 0.029738718 |
| Hyi 68180           | -1.358648994 | 0.10793397  | -1.717908918 | 0.007885661 |
| Ptprb 19263         | -1.358800919 | 0.118801104 | -1.2921243   | 0.030548034 |
| Ccdc41 77048        | -1.359029207 | 0.109645877 | -1.4569585   | 0.036772395 |



|                      |              |             |              |             |
|----------------------|--------------|-------------|--------------|-------------|
| Inpp5b 16330         | -1.359189249 | 0.03494717  | -1.129561371 | 0.11180282  |
| Rtn4rl2 269295       | -1.359226097 | 0.171442156 | 1.017579567  | 0.473078734 |
| Slc22a26 236149      | -1.359331454 | 0.058561148 | -1.43905623  | 0.020896037 |
| Gm4144 100042980     | -1.35965     | 0.170446566 | 1            | #DIV/0!     |
| Gm8453 667094        | -1.35965     | 0.170446566 | 1            | #DIV/0!     |
| Slc25a45 107375      | -1.359674725 | 0.027061577 | -1.211215188 | 0.041847437 |
| AA415398 433752      | -1.35974668  | 0.072866563 | -1.477305797 | 0.027240578 |
| Lrrc46 69297         | -1.359755453 | 0.257236997 | -1.437788618 | 0.170137979 |
| Uchl4 93841          | -1.35989871  | 0.103669178 | -1.545173812 | 0.015195097 |
| Ggh 14590            | -1.360090134 | 0.12463482  | -1.597449699 | 0.051812096 |
| Rragb 245670         | -1.360222857 | 0.351764186 | -3.967316667 | 0.09324139  |
| Cyp3a44 337924       | -1.360333784 | 0.23081477  | -1.637200477 | 0.091007512 |
| Sftpa1 20387         | -1.36053594  | 0.273616688 | -1.038255141 | 0.472092654 |
| Rbms2 56516          | -1.360691735 | 0.009977377 | -1.399389928 | 0.011137678 |
| Kri1 215194          | -1.360716788 | 0.04765346  | -1.533663994 | 0.01271131  |
| Wdr24 268933         | -1.360769327 | 0.003249779 | -1.443772897 | 8.07141E-05 |
| Dnajc14 74330        | -1.361023981 | 0.010909849 | -1.353752217 | 0.003049797 |
| Prr16 71373          | -1.361030535 | 0.189869849 | -1.124142654 | 0.364192226 |
| Cks1b 54124          | -1.361057538 | 0.060208019 | -1.21821474  | 0.122658738 |
| Sreb2 20788          | -1.361091965 | 0.0801247   | -1.079917686 | 0.291898496 |
| Ankrd12 106585       | -1.361884933 | 0.115251451 | -1.361884933 | 0.115251451 |
| Cep250 16328         | -1.362118163 | 0.057623194 | -1.208682797 | 0.11757834  |
| Hao2 56185           | -1.362225    | 0.32369376  | -4.234332783 | 0.01414089  |
| Zfp192 93681         | -1.362619614 | 0.171098346 | -1.313278793 | 0.105459378 |
| Exog 208194          | -1.362841906 | 0.180207378 | -1.362841906 | 0.180207378 |
| Dock5 68813          | -1.362947099 | 0.028187547 | -1.240982353 | 0.046346443 |
| 1300010F03Rik 219189 | -1.363569531 | 0.044846092 | -1.363569531 | 0.044846092 |
| Klhl25 207952        | -1.363693305 | 0.019799636 | -1.319687487 | 0.008461778 |
| Slc25a29 214663      | -1.363752862 | 0.149141563 | 1.033758702  | 0.426379199 |
| Batf3 381319         | -1.363919663 | 0.237626509 | 1.255084747  | 0.15148536  |
| Mab2112 23937        | -1.363920042 | 0.17485789  | -1.137603476 | 0.3409462   |
| Dok2 13449           | -1.363931927 | 0.17567716  | -1.699126233 | 0.071168731 |
| Plch1 269437         | -1.363981872 | 0.400533235 | 1            | #DIV/0!     |
| Tbc1d5 72238         | -1.364093725 | 0.001214459 | -1.364093725 | 0.001214459 |
| Itgb4 192897         | -1.364503043 | 0.178247717 | -1.364503043 | 0.178247717 |
| Dhcr24 74754         | -1.365303118 | 0.005735577 | -1.42560345  | 0.00434391  |
| Fblim1 74202         | -1.365443945 | 0.127416386 | -1.365443945 | 0.127416386 |
| Daam2 76441          | -1.365456668 | 0.148897683 | -1.365456668 | 0.148897683 |
| Slc1a5 20514         | -1.36582096  | 0.080586239 | -1.300100129 | 0.136640923 |
| Zdhhc16 74168        | -1.365898231 | 0.014970877 | -1.415786632 | 0.010897557 |
| Kl 16591             | -1.365994286 | 0.34992363  | -3.98415     | 0.093264411 |
| Acy1 109652          | -1.366139071 | 0.010448511 | -1.366139071 | 0.010448511 |
| Crhr2 12922          | -1.366357574 | 0.325198799 | -2.287459648 | 0.164128923 |
| Sacm1l 83493         | -1.366423267 | 0.170345477 | 1.053212231  | 0.408398892 |
| Zscan20 269585       | -1.366484569 | 0.251112733 | -1.662240025 | 0.156620493 |
| Ptprf 19268          | -1.366819886 | 0.009683023 | -1.450698452 | 0.001535417 |
| Dnase1l3 13421       | -1.366821433 | 0.013247293 | -1.319157091 | 0.011367569 |
| Noxo1 71893          | -1.366848078 | 0.129176875 | -1.366848078 | 0.129176875 |
| Cyp2d13 68444        | -1.366919496 | 0.035429045 | -1.293807057 | 0.069048645 |
| Slc4a4 54403         | -1.367030259 | 0.22246785  | -1.223149946 | 0.22512822  |
| Ocel1 77090          | -1.367257715 | 0.266048113 | -2.001607601 | 0.110569796 |
| Prss53 330657        | -1.367273951 | 0.132583512 | -1.278925444 | 0.073883476 |
| Srpk2 20817          | -1.367431613 | 0.080483645 | -1.517245604 | 0.018362506 |

|                      |              |             |              |             |
|----------------------|--------------|-------------|--------------|-------------|
| Ino80d 227195        | -1.367483995 | 0.081792616 | -1.696254046 | 0.006815997 |
| Farp2 227377         | -1.367500287 | 0.121367117 | -1.154644785 | 0.256790551 |
| Lamb1 16777          | -1.367627989 | 0.098433408 | -1.367627989 | 0.098433408 |
| Esyt1 23943          | -1.367668177 | 0.013839087 | -1.367668177 | 0.013839087 |
| Nckap5l 380969       | -1.367726317 | 0.246785198 | -1.414730654 | 0.133070055 |
| Ccdc64b 212733       | -1.367738506 | 0.325720761 | -2.289771507 | 0.165889172 |
| Aspa 11484           | -1.368037193 | 0.195979893 | -1.077705491 | 0.407397778 |
| Exoc4 20336          | -1.36813263  | 0.164044486 | -1.144472865 | 0.307562581 |
| Alad 17025           | -1.36819759  | 0.015974891 | -1.311572256 | 0.010347948 |
| Lypla1 18777         | -1.36864174  | 0.137233297 | -1.261640564 | 0.126642024 |
| Tmem104 320534       | -1.368651056 | 0.008158954 | -1.452744859 | 0.004044425 |
| Abcc2 12780          | -1.368857029 | 0.089987546 | -1.204624068 | 0.185050868 |
| A730011L01Rik 338371 | -1.368878773 | 0.020234649 | -1.35931623  | 0.009803814 |
| Tada2b 231151        | -1.369042063 | 0.125252076 | -1.543522624 | 0.038943372 |
| Ttc14 67120          | -1.369129473 | 0.138661226 | -1.342349642 | 0.137234493 |
| Dlg5 71228           | -1.369157736 | 0.18085997  | -1.1936258   | 0.293753962 |
| Eif2c2 239528        | -1.369214479 | 0.271922774 | -2.013251401 | 0.118869322 |
| Dsg2 13511           | -1.369707525 | 0.045251509 | -1.369707525 | 0.045251509 |
| Ugdh 22235           | -1.369952706 | 0.032030463 | -1.626077109 | 0.001118807 |
| Zfp646 233905        | -1.370008306 | 0.019566713 | -1.284759113 | 0.040049175 |
| Slc30a7 66500        | -1.370033381 | 0.023795248 | -1.456242066 | 0.007983001 |
| Sepx1 27361          | -1.370060393 | 0.049456969 | -1.354383063 | 0.020952244 |
| Lrp1 16971           | -1.370331359 | 0.003154292 | -1.439130954 | 0.00174441  |
| Ccdc37 243538        | -1.370621322 | 0.370686858 | -7.725       | 0.072984714 |
| Kif3c 16570          | -1.370680117 | 0.088160758 | -1.207067629 | 0.174946714 |
| Aars 234734          | -1.370689085 | 0.011602659 | -1.349068073 | 0.006222731 |
| Fam57b 68952         | -1.370695837 | 0.240445758 | -2.345509408 | 0.018096045 |
| Ppap2b 67916         | -1.37082388  | 0.13255223  | -1.21884052  | 0.229892141 |
| Mllt3 70122          | -1.370847377 | 0.166283797 | -1.372666733 | 0.021663419 |
| Mlst8 56716          | -1.370923446 | 0.035917464 | -1.602167559 | 0.001404432 |
| Neil1 72774          | -1.370986952 | 0.181791007 | -1.318458353 | 0.167099588 |
| Mettl9 59052         | -1.371239501 | 0.037022975 | -1.507427719 | 0.015196515 |
| Myo18b 74376         | -1.371468822 | 0.365548643 | -2.76078     | 0.173296754 |
| Larp6 67557          | -1.371468822 | 0.365548643 | -2.76078     | 0.173296754 |
| Zfp820 75424         | -1.371468822 | 0.365548643 | -2.76078     | 0.173296754 |
| Ifitm3 66141         | -1.371630126 | 0.034358364 | -1.539697337 | 0.007719524 |
| Clec1a 243653        | -1.371676929 | 0.297558623 | 1.029360642  | 0.481678818 |
| Cyp2c29 13095        | -1.371839433 | 0.041943324 | -1.196713363 | 0.030096724 |
| Ino80b 70020         | -1.371921632 | 0.046365524 | -1.371921632 | 0.046365524 |
| Polr3g 67486         | -1.372344805 | 0.210589744 | -1.184565558 | 0.25915258  |
| Atrn 11990           | -1.372425956 | 0.142762446 | -1.095989391 | 0.320857335 |
| Timd4 276891         | -1.372433331 | 0.086246895 | -1.728194322 | 0.004431072 |
| Il2rg 16186          | -1.37243927  | 0.104054728 | -1.608733896 | 0.0381154   |
| Neu2 23956           | -1.372606798 | 0.203553081 | -1.638049745 | 0.061439593 |
| Fam82a1 381110       | -1.372633413 | 0.150166478 | -1.317541194 | 0.143284698 |
| Nbn 27354            | -1.372748962 | 0.030863666 | -1.372748962 | 0.030863666 |
| Golim4 73124         | -1.37282893  | 0.208525486 | -1.085967229 | 0.410604126 |
| Pax1 18503           | -1.37283176  | 0.355805489 | -4.56078     | 0.070574133 |
| Wfdc1 67866          | -1.372931143 | 0.214769833 | -1.075099504 | 0.423329787 |
| Kctd12 239217        | -1.373110937 | 0.090851235 | -1.524936827 | 0.054333965 |
| Klf12 16597          | -1.373152972 | 0.18894986  | -1.079360156 | 0.400999481 |
| Atp11c 320940        | -1.373206103 | 0.235581695 | -1.141186572 | 0.297240828 |
| Haao 107766          | -1.373316041 | 0.016541094 | -1.372872023 | 0.005802739 |

|                     |              |             |              |             |
|---------------------|--------------|-------------|--------------|-------------|
| Arhgef11 213498     | -1.373484362 | 0.024731256 | -1.507379146 | 0.008064605 |
| Fcho1 74015         | -1.373821277 | 0.188537467 | -2.10593426  | 0.005231011 |
| Zc3h13 67302        | -1.373965271 | 0.0747422   | -1.409910673 | 0.029294088 |
| Fam63b 235461       | -1.374124508 | 0.231890485 | -2.413903026 | 0.012572329 |
| 2010003K15Rik 75606 | -1.374127227 | 0.014372685 | -1.36011306  | 0.008334385 |
| Eif2ak2 19106       | -1.374330386 | 0.052411328 | -1.459944777 | 0.004385075 |
| Pdcd10 56426        | -1.37433759  | 0.11823498  | -1.047927753 | 0.408104341 |
| Sult1b1 56362       | -1.374339955 | 0.118075272 | -1.684687948 | 0.004449345 |
| Sema4g 26456        | -1.374396002 | 0.04036705  | -1.225329552 | 0.064791735 |
| Smyd3 69726         | -1.374522229 | 0.159182166 | -1.374522229 | 0.159182166 |
| Cenpt 320394        | -1.374525457 | 0.159482782 | -1.153225218 | 0.298339705 |
| Aldh8a1 237320      | -1.374813137 | 0.001951073 | -1.447572783 | 0.000834493 |
| Slit1 20562         | -1.37500106  | 0.3243873   | -2.456106061 | 0.148633746 |
| Phlpp1 98432        | -1.375134699 | 0.119368529 | -1.375134699 | 0.119368529 |
| Crot 74114          | -1.375231964 | 0.099610864 | -1.429648123 | 0.063731584 |
| Zscan12 22758       | -1.375316728 | 0.119205284 | -1.252624676 | 0.212145694 |
| BC017647 216971     | -1.375505471 | 0.004956877 | -1.328577475 | 0.011478424 |
| Bod1 665775         | -1.376123758 | 0.137019466 | -1.13497338  | 0.294454237 |
| Fbln5 23876         | -1.376196442 | 0.16930265  | -1.219152137 | 0.228148132 |
| Serpina3g 20715     | -1.376308033 | 0.027086867 | -1.293575354 | 0.002937639 |
| Fam101b 76566       | -1.376472892 | 0.260540935 | -2.55009207  | 0.023662449 |
| Mir686 751525       | -1.376565313 | 0.356750222 | -8.263164218 | 0.038200272 |
| Arhgef5 54324       | -1.376693266 | 0.024121989 | -1.394281272 | 0.0081283   |
| Ikzf1 22778         | -1.376751578 | 0.279172331 | -1.244661992 | 0.336049189 |
| Epb4.113 13823      | -1.376767551 | 0.271687252 | -1.376767551 | 0.271687252 |
| Lonp2 66887         | -1.376787795 | 0.00580144  | -1.310609179 | 0.011553562 |
| Mapk4 225724        | -1.376907849 | 0.262228954 | -1.376907849 | 0.262228954 |
| 2310003H01Rik 71885 | -1.37713444  | 0.075022103 | -1.205810111 | 0.15199518  |
| B230118H07Rik 68170 | -1.377191807 | 0.036566825 | -1.234338276 | 0.059241915 |
| Gbp7 229900         | -1.377264395 | 0.132253397 | -1.098989152 | 0.290328467 |
| Thumpd3 14911       | -1.377388431 | 0.084708987 | -1.177075523 | 0.174440926 |
| Gm3414 100041576    | -1.377689939 | 0.322765172 | -2.460909091 | 0.146965028 |
| Vav2 22325          | -1.377750989 | 0.211561484 | 1.124796275  | 0.341776157 |
| Gm13308 621580      | -1.377877103 | 0.345406301 | 1.298566723  | 0.385674711 |
| Dio1 13370          | -1.377885862 | 0.007641207 | -1.445686895 | 0.005534754 |
| Gnao1 14681         | -1.378009589 | 0.262146083 | -1.517362477 | 0.193892634 |
| 41160 20362         | -1.378037872 | 0.090526693 | -1.069932851 | 0.343539825 |
| Cyp2f2 13107        | -1.378092154 | 0.017802252 | -1.510038291 | 0.004876936 |
| Pibf1 52023         | -1.378144715 | 0.309109916 | -2.492723342 | 0.081213626 |
| Sik2 235344         | -1.378287074 | 0.230663695 | -1.448296524 | 0.192518363 |
| Gtf3a 66596         | -1.378433077 | 0.146135253 | -1.378433077 | 0.146135253 |
| Atg3 67841          | -1.37845722  | 0.004993745 | -1.458645486 | 0.000567676 |
| Yars2 70120         | -1.378721373 | 0.080438385 | -1.46879629  | 0.051246532 |
| Nr2f2 11819         | -1.378748817 | 0.067476549 | -1.32869998  | 0.076977578 |
| Dynlt1a 100310872   | -1.378965642 | 0.318380277 | -1.397166728 | 0.337866371 |
| Rbm20 73713         | -1.379111652 | 0.228659709 | -1.704742563 | 0.141481094 |
| Tubg1 103733        | -1.379161438 | 0.009409663 | -1.458450088 | 0.005767648 |
| Aaas 223921         | -1.379237503 | 0.146531564 | -1.84072627  | 0.018259453 |
| Psip1 101739        | -1.379451967 | 0.05293051  | -1.379451967 | 0.05293051  |
| Gba 14466           | -1.379566846 | 0.01627601  | -1.379566846 | 0.01627601  |
| Tpcn1 252972        | -1.379687592 | 0.000276515 | -1.379687592 | 0.000276515 |
| Bcl2 12043          | -1.379878053 | 0.285220517 | -1.834027078 | 0.171077072 |
| Srsf11 69207        | -1.379919415 | 0.190984655 | 1.068641153  | 0.406717095 |

|                     |              |             |              |             |
|---------------------|--------------|-------------|--------------|-------------|
| Car9 230099         | -1.380048213 | 0.362834977 | -2.8         | 0.173296754 |
| Prodh 19125         | -1.380091954 | 0.003295134 | -1.345513877 | 0.000715713 |
| Odf2 18286          | -1.380268176 | 0.148562695 | -1.74214934  | 0.043210081 |
| Eda 13607           | -1.38042249  | 0.194935966 | -1.669980239 | 0.113370679 |
| Sdccag3 68112       | -1.380578979 | 0.00455344  | -1.42667383  | 0.001603199 |
| Gmppa 69080         | -1.38075742  | 0.058830824 | -1.136961065 | 0.212972903 |
| Fam188a 66960       | -1.380769044 | 0.19274176  | -1.075620797 | 0.408782705 |
| Clcn2 12724         | -1.380796216 | 0.001078411 | -1.380796216 | 0.001078411 |
| Elmo3 234683        | -1.380964057 | 0.009021394 | -1.539673917 | 0.000354513 |
| Aim1 230806         | -1.3810004   | 0.194075377 | -1.718475033 | 0.097951795 |
| Pold2 18972         | -1.381481303 | 0.046101881 | -1.381481303 | 0.046101881 |
| Ccrn4 12457         | -1.381582378 | 0.102283491 | -1.373219294 | 0.054161493 |
| Rbl2 19651          | -1.381728712 | 0.219433443 | -1.606817199 | 0.087484785 |
| Ispd 75847          | -1.381975385 | 0.27162601  | -1.612452991 | 0.182349547 |
| Rom1 19881          | -1.38220252  | 0.074630213 | -1.180347872 | 0.151582095 |
| Baz1a 217578        | -1.382271076 | 0.114112312 | -1.256434961 | 0.206225732 |
| Trim44 80985        | -1.382340488 | 0.129399691 | -1.581349814 | 0.07586868  |
| Nod2 257632         | -1.382378653 | 0.341144726 | -1.382378653 | 0.341144726 |
| Tnfrsf21 94185      | -1.382401241 | 0.130170034 | -1.696585706 | 0.040641712 |
| Cnih4 98417         | -1.382480124 | 0.002098227 | -1.45484347  | 0.000181572 |
| Acly 104112         | -1.382519471 | 0.086740959 | -1.19126724  | 0.177724908 |
| Zfp799 240064       | -1.382542426 | 0.174937073 | -2.217059735 | 0.00209878  |
| Cdkn2aip 70925      | -1.382803012 | 0.149969622 | -1.382803012 | 0.149969622 |
| Tram2 170829        | -1.382850482 | 0.142327196 | -1.113388742 | 0.314541002 |
| Arid1a 93760        | -1.382873553 | 0.117937065 | -1.113237768 | 0.24074699  |
| Zfc3h1 216345       | -1.382931286 | 0.155271549 | -1.066013813 | 0.364890319 |
| Pkp3 56460          | -1.382997547 | 0.095073759 | -1.163956027 | 0.192015432 |
| Snrnp25 78372       | -1.383003557 | 0.198747425 | -1.383003557 | 0.198747425 |
| Plcx1 403178        | -1.383215676 | 0.109333066 | -1.217264147 | 0.204764569 |
| Naaa 67111          | -1.383479856 | 0.150560821 | -1.142206583 | 0.313624281 |
| St3gal3 20441       | -1.383577558 | 0.004338734 | -1.32440716  | 0.01020353  |
| Mme 17380           | -1.384098766 | 0.207274372 | 1.173122546  | 0.223982008 |
| Thns1 208967        | -1.384191483 | 0.234362869 | 1.194728796  | 0.288001375 |
| Cd4 12504           | -1.384388638 | 0.05988025  | -1.384549973 | 0.060509026 |
| 2410091C18Rik 73694 | -1.384421546 | 0.045940671 | -1.218109993 | 0.070040812 |
| Ttc15 217449        | -1.38452783  | 0.049543858 | -1.511475417 | 0.028437143 |
| Gpr39 71111         | -1.384635554 | 0.097251678 | -1.601113837 | 0.005790899 |
| Rdh16 19683         | -1.384888276 | 0.079670658 | -1.51544462  | 0.016299959 |
| Klhl17 231003       | -1.385075579 | 0.026068959 | -1.498962386 | 0.013241755 |
| Mmp9 17395          | -1.385150748 | 0.235527833 | -1.089293569 | 0.425973545 |
| Crkl 12929          | -1.385193796 | 0.274763364 | -1.385193796 | 0.274763364 |
| Postn 50706         | -1.385228535 | 0.189138251 | -1.537224751 | 0.12557546  |
| Kif11 16551         | -1.385313689 | 0.315371574 | -1.385313689 | 0.315371574 |
| Klb 83379           | -1.386007476 | 0.039487781 | -1.298046008 | 0.030418116 |
| Ccn1 56706          | -1.386043081 | 0.12653697  | -1.186531669 | 0.256718888 |
| Hvcn1 74096         | -1.386153923 | 0.156397706 | -1.155794774 | 0.31397169  |
| Cyp2c50 107141      | -1.386525958 | 0.126993994 | -1.115032291 | 0.275718862 |
| Huwe1 59026         | -1.386628779 | 0.047758473 | -1.297411812 | 0.045304074 |
| Evi5 14020          | -1.38679163  | 0.16075036  | 1.015914331  | 0.468835704 |
| Rad54 19366         | -1.386799788 | 0.30480756  | -3.356105893 | 0.038371173 |
| Vldlr 22359         | -1.386960215 | 0.201270543 | -1.270852999 | 0.214720014 |
| Zfp763 73451        | -1.387952655 | 0.317155729 | -1.903582746 | 0.19072579  |
| Rtn1 104001         | -1.388110974 | 0.260484873 | -1.842196518 | 0.152968183 |

|                     |              |             |              |             |
|---------------------|--------------|-------------|--------------|-------------|
| Pde1b 18574         | -1.388471312 | 0.200211628 | -1.180343835 | 0.342890587 |
| Camk2a 12322        | -1.388521756 | 0.297796367 | -2.391230356 | 0.116468777 |
| Arhgap32 330914     | -1.388564699 | 0.167885339 | -1.376547679 | 0.158314968 |
| Gse1 382034         | -1.388667786 | 0.197801024 | -1.638785125 | 0.131695203 |
| Gm5465 432879       | -1.388883333 | 0.170446566 | 1            | #DIV/0!     |
| 6230400D17Rik 76133 | -1.388902728 | 0.231855875 | -1.165483644 | 0.357431858 |
| Sc5d 235293         | -1.389275205 | 0.053835562 | -1.273732513 | 0.023762986 |
| C1qtnf7 109323      | -1.389545849 | 0.279829777 | -3.010586893 | 0.023511985 |
| Zfand1 66361        | -1.389815682 | 0.165590607 | -1.389815682 | 0.165590607 |
| Noa1 56412          | -1.390264982 | 0.029227972 | -1.540755162 | 0.009423792 |
| Trpm4 68667         | -1.390560948 | 0.077666283 | -1.552015943 | 0.015741031 |
| Zc3h11a 70579       | -1.390592353 | 0.132174864 | -1.390592353 | 0.132174864 |
| Inf2 70435          | -1.390718507 | 0.000426567 | -1.407281491 | 0.000841315 |
| Dcun1d4 100737      | -1.390899117 | 0.121369066 | -1.060279308 | 0.395816383 |
| Vps41 218035        | -1.390970243 | 0.028676185 | -1.37086041  | 0.00740971  |
| Atm 11920           | -1.391002034 | 0.222220319 | -1.938700635 | 0.081856295 |
| Zfp180 210135       | -1.391143009 | 0.119674046 | -1.492384976 | 0.044479407 |
| Gjb2 14619          | -1.391193476 | 0.042443507 | -1.135955433 | 0.146632485 |
| Ido2 209176         | -1.391398638 | 0.016612676 | -1.391398638 | 0.016612676 |
| Osbpl5 79196        | -1.39146991  | 0.109670302 | -1.408156722 | 0.089242275 |
| Mgam 232714         | -1.391580247 | 0.020583374 | -1.506286999 | 0.009653938 |
| Ncoa6 56406         | -1.391721138 | 0.196877321 | -1.278717648 | 0.245947453 |
| Metap1d 66559       | -1.391795808 | 0.015977309 | -1.483564869 | 0.003792987 |
| Gpr110 77596        | -1.391928303 | 0.278993051 | -1.391928303 | 0.278993051 |
| Ubp2 68926          | -1.392022777 | 0.116252826 | -1.595079071 | 0.064426589 |
| Rgl1 19731          | -1.392122216 | 0.053126673 | -1.392122216 | 0.053126673 |
| BC005537 79555      | -1.392319256 | 0.162467093 | -1.307599354 | 0.19279403  |
| Cmpk2 22169         | -1.392346524 | 0.169410614 | -1.226486976 | 0.288287299 |
| Bcl7a 77045         | -1.392677348 | 0.027120386 | -1.163116866 | 0.087621202 |
| S1pr1 13609         | -1.392838823 | 0.08754642  | -1.180234429 | 0.174527771 |
| Trim46 360213       | -1.392862431 | 0.303053729 | -3.088025253 | 0.059099193 |
| Vang1 229658        | -1.392959969 | 0.097607403 | -1.366251841 | 0.065099975 |
| Fzd1 14362          | -1.393095078 | 0.153460669 | -1.20125434  | 0.268131068 |
| Cyp2e1 13106        | -1.39325762  | 0.038138293 | -1.261337684 | 0.073428732 |
| Mafb 16658          | -1.393524677 | 0.047690005 | -1.272314597 | 0.097594958 |
| Gm5069 277333       | -1.393922029 | 0.091836311 | -1.276186884 | 0.16057112  |
| Clec16a 74374       | -1.394194668 | 0.038525958 | -1.30430756  | 0.078924482 |
| Masp1 17174         | -1.394372375 | 0.088370854 | -1.375354556 | 0.065218534 |
| Cyp2b9 13094        | -1.39440033  | 0.02530359  | -1.39440033  | 0.02530359  |
| Lrch1 380916        | -1.394498864 | 0.062938894 | -1.394498864 | 0.062938894 |
| Aqr 11834           | -1.394819505 | 0.038679656 | -1.551430928 | 0.014675793 |
| Ing5 66262          | -1.394963033 | 0.109310717 | -1.662112837 | 0.039777711 |
| Rapgef2 76089       | -1.395038682 | 0.186026539 | -1.032543746 | 0.447650408 |
| Snai2 20583         | -1.395054898 | 0.197535227 | -1.247063581 | 0.181364675 |
| Loxl1 16949         | -1.395670553 | 0.186122766 | -2.24976513  | 0.007408039 |
| Slc46a3 71706       | -1.395858563 | 0.012379634 | -1.317732051 | 0.025716046 |
| Nfix 18032          | -1.396133801 | 0.234748644 | -1.179973133 | 0.292289683 |
| Adck1 72113         | -1.396543439 | 0.04193251  | -1.624253327 | 0.005416471 |
| Igtp 16145          | -1.396565322 | 0.0010129   | -1.342090453 | 0.001752293 |
| Rdx 19684           | -1.396663459 | 0.144780234 | -1.189687249 | 0.192364698 |
| Fam189b 68521       | -1.396717296 | 0.258872616 | -1.036661912 | 0.472620163 |
| Rbms3 207181        | -1.396830066 | 0.289216007 | -2.370158645 | 0.110597757 |
| Ddb2 107986         | -1.396908202 | 0.266470036 | 1.119222435  | 0.395387717 |

|                      |              |             |              |             |
|----------------------|--------------|-------------|--------------|-------------|
| Abcc10 224814        | -1.397336525 | 0.055167668 | -1.757414999 | 0.001130136 |
| Tpk1 29807           | -1.397402766 | 0.086703459 | -1.825288334 | 0.006802134 |
| 1190007107Rik 544717 | -1.397416249 | 0.124652571 | -1.148529968 | 0.268043013 |
| Ncf2 17970           | -1.39767543  | 0.191379085 | -1.39767543  | 0.191379085 |
| Med15 94112          | -1.397694534 | 0.050421427 | -1.131490954 | 0.192059388 |
| Mapkapk3 102626      | -1.397936532 | 0.199282005 | 1.073114991  | 0.40938713  |
| Gpd1 14555           | -1.398168875 | 0.004131419 | -1.347850643 | 0.009543132 |
| Pdgfa 18590          | -1.398219388 | 0.244183524 | -1.063214385 | 0.449805873 |
| 1300018117Rik 72325  | -1.398293107 | 0.028466097 | -1.161497761 | 0.082701263 |
| Grif1 232906         | -1.398328048 | 0.046196404 | -1.235089506 | 0.079503591 |
| Pipox 19193          | -1.398776285 | 4.04544E-05 | -1.441602628 | 3.02541E-05 |
| Mdm4 17248           | -1.398818884 | 0.277935505 | -1.749027877 | 0.159597467 |
| Wasf1 83767          | -1.398881142 | 0.168150962 | -1.398881142 | 0.168150962 |
| Adamts7 108153       | -1.398886439 | 0.16353285  | -1.170672938 | 0.205504817 |
| Nqo2 18105           | -1.399153412 | 0.0544023   | -1.254927357 | 0.110000972 |
| Tctex1d2 66061       | -1.399198323 | 0.292822829 | 1.261638371  | 0.310538711 |
| Rabif 98710          | -1.399225809 | 0.040711047 | -1.399225809 | 0.040711047 |
| Mtap1s 270058        | -1.399388446 | 0.059522741 | -1.398559327 | 0.053224869 |
| Ubiad1 71707         | -1.399487494 | 0.12773291  | -1.399487494 | 0.12773291  |
| Evc 59056            | -1.399614702 | 0.121369993 | -1.717418482 | 0.037781344 |
| Acad10 71985         | -1.399714728 | 0.003250499 | -1.544995845 | 5.85779E-05 |
| Ifi47 15953          | -1.399886492 | 0.101486161 | -1.189879008 | 0.211981759 |
| Memo1 76890          | -1.400067583 | 0.025404259 | -1.342245296 | 0.016114482 |
| Epn2 13855           | -1.400160256 | 0.026868099 | -1.466271088 | 0.024698763 |
| Ccdc68 381175        | -1.400308529 | 0.212769544 | 1.141221796  | 0.328795646 |
| Fes 14159            | -1.400334461 | 0.051335208 | -1.255172746 | 0.10271895  |
| Trpm2 28240          | -1.400468943 | 0.156365616 | -1.891593714 | 0.028230363 |
| 9030617003Rik 217830 | -1.400510987 | 0.001499539 | -1.400510987 | 0.001499539 |
| Fam122a 68034        | -1.400887126 | 0.039361736 | -1.400887126 | 0.039361736 |
| Clip2 269713         | -1.401230547 | 0.104806492 | -1.011446674 | 0.46403691  |
| Gpx6 75512           | -1.401304222 | 0.333146906 | 1.52036734   | 0.280467625 |
| Saa4 20211           | -1.401395602 | 0.049233417 | -1.251074693 | 0.096070989 |
| Spata7 104871        | -1.401434453 | 0.315381505 | -1.401434453 | 0.315381505 |
| Bco2 170752          | -1.401594578 | 0.03058228  | -1.534527963 | 0.003129076 |
| Hck 15162            | -1.401717193 | 0.089729336 | -1.591665576 | 0.013647685 |
| Frzb 20378           | -1.402133561 | 0.268924107 | 1.023331014  | 0.482819656 |
| Srbd1 78586          | -1.402644168 | 0.157556522 | -1.402644168 | 0.157556522 |
| Nup43 69912          | -1.402713733 | 0.18479868  | -1.612141871 | 0.086431447 |
| Cyb5r3 109754        | -1.40278312  | 0.009951249 | -1.40278312  | 0.009951249 |
| Dusp12 80915         | -1.402839273 | 0.064024259 | -1.371849997 | 0.03014364  |
| Cxcr3 12766          | -1.4028895   | 0.298789489 | 1.190041347  | 0.384964438 |
| Gvin1 74558          | -1.403101033 | 0.267324374 | -1.025776776 | 0.481932633 |
| Pacs1 107975         | -1.403143396 | 0.076197213 | -1.562224772 | 0.017807812 |
| Nt5e 23959           | -1.403344388 | 0.092602344 | -1.268725357 | 0.16654517  |
| Cdc42ep3 260409      | -1.403381438 | 0.173719881 | -1.59328595  | 0.086403434 |
| Rabgap1l 29809       | -1.403415996 | 0.057130078 | -1.321524022 | 0.10132577  |
| Parp14 547253        | -1.403474022 | 0.025002673 | -1.599281644 | 0.003034164 |
| 4933403F05Rik 108654 | -1.403555754 | 0.03234927  | -1.256327483 | 0.050622205 |
| Cd19 12478           | -1.40360422  | 0.280111284 | -2.071762477 | 0.043677989 |
| Fgd3 30938           | -1.403877997 | 0.380314069 | 1.264185714  | 0.40907038  |
| Ophn1 94190          | -1.403898225 | 0.066098939 | -1.534755373 | 0.043946904 |
| R3hdm1 226412        | -1.403948107 | 0.132356612 | -1.202330299 | 0.142205943 |
| Cd97 26364           | -1.404154892 | 0.034099183 | -1.404154892 | 0.034099183 |

|                      |              |             |              |             |
|----------------------|--------------|-------------|--------------|-------------|
| BC029214 227622      | -1.404707792 | 0.150384308 | -1.420022616 | 0.113223191 |
| Clec11a 20256        | -1.404743262 | 0.150899133 | -1.959801993 | 0.014742001 |
| Oas2 23962           | -1.404809191 | 0.093631936 | -1.619347537 | 0.043680835 |
| Zmym2 76007          | -1.405535725 | 0.121704985 | -1.405535725 | 0.121704985 |
| Tmc6 217353          | -1.40566478  | 0.069332035 | -1.226218686 | 0.138799428 |
| Npepl1 228961        | -1.405767187 | 0.000643752 | -1.458382423 | 0.000530498 |
| D6Ert527e 52372      | -1.40616     | 0.375963643 | 1            | #DIV/0!     |
| Zfp788 67607         | -1.406208007 | 0.27759175  | -1.406208007 | 0.27759175  |
| Sh3yl1 24057         | -1.406427249 | 0.03927316  | -1.239661095 | 0.031373244 |
| Apobec1 11810        | -1.406560556 | 0.057283137 | -1.253023527 | 0.115501782 |
| Tm6sf2 107770        | -1.406671323 | 0.005383758 | -1.406671323 | 0.005383758 |
| 0610007P08Rik 76251  | -1.406855895 | 0.104903251 | -1.235822548 | 0.196086947 |
| Acot4 171282         | -1.407165002 | 0.010809877 | -1.528112661 | 0.003584439 |
| Acrbp 54137          | -1.407204667 | 0.01871488  | -1.325859856 | 0.039679899 |
| Gtse1 29870          | -1.407346838 | 0.251479021 | -1.653455991 | 0.15800477  |
| Slc25a36 192287      | -1.407837697 | 0.193752387 | -1.21624931  | 0.321824738 |
| Nodal 18119          | -1.407848561 | 0.320727913 | -2.699824713 | 0.141377162 |
| Ing3 71777           | -1.408281164 | 0.078292316 | -1.629962263 | 0.03013198  |
| 2210009G21Rik 74243  | -1.408450704 | 0.376110186 | 1            | #DIV/0!     |
| Ccbe1 320924         | -1.40857499  | 0.198211437 | -1.105299181 | 0.395067858 |
| Hyls1 76832          | -1.409122588 | 0.200107895 | -1.675877995 | 0.071822305 |
| Atp11a 50770         | -1.409285541 | 0.108683266 | -1.045522533 | 0.407104272 |
| Myl4 17896           | -1.409424705 | 0.216035884 | -1.065315382 | 0.437142415 |
| Stxbp5 207227        | -1.409574731 | 0.310604314 | -2.44590404  | 0.149033783 |
| Cldn3 12739          | -1.409848681 | 0.035976292 | -1.558294525 | 0.002787465 |
| Ptgis 19223          | -1.410102794 | 0.197371742 | 1.143837416  | 0.281559745 |
| A830010M20Rik 231570 | -1.410350966 | 0.296325252 | -2.704623563 | 0.095200291 |
| Lactb 80907          | -1.410617041 | 0.021552819 | -1.267830555 | 0.022825139 |
| Gpd2 14571           | -1.410646816 | 0.042382876 | -1.145666575 | 0.154838858 |
| Itfg1 71927          | -1.410663953 | 0.039146942 | -1.317563624 | 0.024445473 |
| 2410127L17Rik 67383  | -1.410908837 | 0.106011217 | -1.550521042 | 0.051675711 |
| Phf12 268448         | -1.410931058 | 0.066579681 | -1.475825654 | 0.030743921 |
| Prlr 19116           | -1.411181855 | 0.023890403 | -1.536911231 | 0.011494546 |
| 1700018L02Rik 67329  | -1.411649739 | 0.154815327 | -1.371474752 | 0.117680419 |
| Dhrs7 66375          | -1.411787062 | 0.002498953 | -1.276217807 | 0.006941464 |
| Acsf2 264895         | -1.411919407 | 0.003855852 | -1.446699544 | 0.000816466 |
| Dnajc28 246738       | -1.412209803 | 0.075966111 | -1.13700508  | 0.214017071 |
| Acss3 380660         | -1.412600775 | 0.293832544 | -1.559277338 | 0.195837    |
| Slc17a3 105355       | -1.412801345 | 0.008063261 | -1.30685468  | 0.015582352 |
| Gga3 260302          | -1.412839786 | 0.128002722 | -1.863363476 | 0.018721771 |
| Eccsr 68545          | -1.412996723 | 0.089892027 | -1.230776394 | 0.176860363 |
| Cby1 73739           | -1.413106992 | 0.054634283 | -1.388585698 | 0.020951934 |
| Ankrd49 56503        | -1.413504215 | 0.154946117 | -1.364895688 | 0.096917227 |
| Hirip3 233876        | -1.413521382 | 0.074846854 | -1.588289568 | 0.040524447 |
| Anpep 16790          | -1.41362881  | 3.34942E-05 | -1.45062851  | 1.20536E-05 |
| Mmp15 17388          | -1.41367882  | 0.001868105 | -1.41367882  | 0.001868105 |
| Pdxk 216134          | -1.413732439 | 0.003848413 | -1.572966343 | 9.18979E-05 |
| Kbtbd11 74901        | -1.413814902 | 0.272771105 | -1.80018926  | 0.145920046 |
| Brd4 57261           | -1.413960717 | 0.159794969 | -1.210884738 | 0.205818038 |
| Chrnbl 11443         | -1.413969466 | 0.287928252 | -2.420672074 | 0.114888232 |
| Pygo1 72135          | -1.414025049 | 0.30814708  | -2.453626263 | 0.146761448 |
| lpo7 233726          | -1.414041046 | 0.186005104 | -1.414041046 | 0.186005104 |
| Ltbp1 268977         | -1.414339315 | 0.28138026  | -3.170216909 | 0.03206401  |

|                     |              |             |              |             |
|---------------------|--------------|-------------|--------------|-------------|
| Afap1l2 226250      | -1.41436273  | 0.275988159 | -1.035522573 | 0.477609645 |
| Cyp2c54 404195      | -1.414389628 | 0.128593206 | 1.00537599   | 0.484911039 |
| Alg13 67574         | -1.414714235 | 0.163560971 | -1.414714235 | 0.163560971 |
| 2610528J11Rik 66451 | -1.414977942 | 0.005571439 | -1.428686755 | 0.001966722 |
| lpo8 320727         | -1.415417977 | 0.100369617 | -1.047482485 | 0.390211865 |
| Fam171a2 217219     | -1.415471234 | 0.121527105 | -1.031229894 | 0.441747739 |
| Ccdc159 67119       | -1.415483367 | 0.101771049 | -1.064174548 | 0.372158673 |
| Hars2 70791         | -1.415603876 | 0.060912347 | -1.43334227  | 0.035001552 |
| Phf6 70998          | -1.415915493 | 0.049332544 | -1.135138399 | 0.120333184 |
| Sdccag8 76816       | -1.416189228 | 0.115175905 | -1.52767969  | 0.038681624 |
| Pclo 26875          | -1.416291337 | 0.356657582 | -2.76078     | 0.173296754 |
| Dfna5 54722         | -1.416317681 | 0.074050663 | -1.269946816 | 0.149604302 |
| Cdc25b 12531        | -1.41646556  | 0.176859855 | -1.693589215 | 0.043408505 |
| Arhgef40 268739     | -1.416593693 | 0.03231154  | -1.458104334 | 0.004855699 |
| Tiam2 24001         | -1.417031251 | 0.19850059  | -2.198513623 | 0.025170376 |
| Zfp942 73233        | -1.417194586 | 0.239235462 | -1.187512232 | 0.356355769 |
| Fam131a 78408       | -1.41727279  | 0.225856265 | -2.498591419 | 0.016722945 |
| Rhoj 80837          | -1.417533676 | 0.07985509  | -1.204064809 | 0.157083228 |
| Esrp2 77411         | -1.417944438 | 0.030623474 | -1.417944438 | 0.030623474 |
| D14Ert668e 219132   | -1.418120739 | 0.087328045 | -1.217517434 | 0.180065862 |
| Ugt2b34 100727      | -1.418268508 | 0.059664463 | -1.558092349 | 0.037643108 |
| Snapin 20615        | -1.418300856 | 0.094047623 | -1.589327276 | 0.027426518 |
| Gnpnat1 54342       | -1.418500646 | 0.009874293 | -1.418500646 | 0.009874293 |
| St6gal1 20440       | -1.418521845 | 0.007538767 | -1.418521845 | 0.007538767 |
| Tenc1 209039        | -1.418583842 | 0.008293733 | -1.418583842 | 0.008293733 |
| Gsto2 68214         | -1.418732965 | 0.284414672 | -1.418732965 | 0.284414672 |
| Mir135a-1 387153    | -1.419459524 | 0.146733581 | -1.184110487 | 0.275247336 |
| Ylpm1 56531         | -1.419511097 | 0.162054554 | -1.047050378 | 0.396716938 |
| Socs6 54607         | -1.419585041 | 0.078706044 | -1.626468011 | 0.014810649 |
| Ankrd23 78321       | -1.419830056 | 0.234351954 | -2.063826636 | 0.091888324 |
| Slc26a1 231583      | -1.420024539 | 0.052049001 | -1.132222473 | 0.198536506 |
| Tia1 21841          | -1.420109931 | 0.123824387 | -1.149744272 | 0.267251144 |
| Depdc5 277854       | -1.420328972 | 0.058568243 | -1.217969747 | 0.116973552 |
| Ncor2 20602         | -1.420761215 | 0.042753081 | -1.453715295 | 0.016468355 |
| Car8 12319          | -1.420802686 | 0.00965154  | -1.366314876 | 0.021171535 |
| Tomm40 641376       | -1.421160482 | 0.00873611  | -1.506951109 | 0.005761983 |
| Zfp64 22722         | -1.421661414 | 0.012029204 | -1.381401471 | 0.025643021 |
| Fnip1 216742        | -1.422132145 | 0.231876193 | -1.220076656 | 0.335571855 |
| Plcl1 227120        | -1.422617218 | 0.327887737 | 1.527583413  | 0.276310115 |
| Tbc1d10c 108995     | -1.422715398 | 0.277198657 | -1.231308931 | 0.296562833 |
| Ptpra 19262         | -1.422809921 | 0.035616182 | -1.14106711  | 0.075137911 |
| Meg3 17263          | -1.422911612 | 0.258409597 | 1.04937929   | 0.460618226 |
| Zfp229 381067       | -1.423168575 | 0.229815127 | -1.423168575 | 0.229815127 |
| Mbd6 110962         | -1.42344178  | 0.061624965 | -1.13206525  | 0.198890229 |
| Zfp579 68490        | -1.423688741 | 0.008864064 | -1.423688741 | 0.008864064 |
| Sfpi1 20375         | -1.423764074 | 0.025596093 | -1.291613917 | 0.04455389  |
| Pank3 211347        | -1.42410865  | 0.145604673 | -1.084851618 | 0.333451451 |
| Spn 20737           | -1.424365949 | 0.169305655 | -1.424365949 | 0.169305655 |
| Mllt10 17354        | -1.424656684 | 0.150460793 | -1.664873945 | 0.094181156 |
| Inhbb 16324         | -1.424696719 | 0.211669317 | -1.512123214 | 0.14609309  |
| Tbce 70430          | -1.424753242 | 0.104739075 | -1.549560409 | 0.060902093 |
| Tmem173 72512       | -1.424851982 | 0.192378275 | -2.0373991   | 0.049953457 |
| Frmd4a 209630       | -1.424961015 | 0.104482816 | -1.48156468  | 0.031634099 |



|                      |              |             |              |             |
|----------------------|--------------|-------------|--------------|-------------|
| Jmjd1c 108829        | -1.425125432 | 0.191959107 | -1.084263209 | 0.408256126 |
| Cc2d2a 231214        | -1.425136202 | 0.15692297  | -2.059627633 | 0.007487411 |
| Abhd2 54608          | -1.425422497 | 0.223829466 | -1.17300254  | 0.322473431 |
| Glt8d1 76485         | -1.425573857 | 0.135022333 | -1.425573857 | 0.135022333 |
| Srp54c 100101806     | -1.42558307  | 0.164639066 | -1.191182978 | 0.292467213 |
| Cpne1 266692         | -1.425583461 | 0.132024801 | -1.425583461 | 0.132024801 |
| Angel1 68737         | -1.425679882 | 0.071166646 | -1.157908555 | 0.232516559 |
| Nubpl 76826          | -1.425685452 | 0.04027966  | -1.790737659 | 0.000776513 |
| 1110032A03Rik 68721  | -1.425798775 | 0.006397287 | -1.355342513 | 0.013518839 |
| Trem14 224840        | -1.426032852 | 0.192627574 | -1.20016334  | 0.335077934 |
| Eif4e3 66892         | -1.426307757 | 0.081195062 | -1.23829695  | 0.166862079 |
| Tmem165 21982        | -1.42640871  | 0.154485948 | 1.028910789  | 0.452743269 |
| Smarcc2 68094        | -1.426430091 | 0.019479208 | -1.416119635 | 0.005151076 |
| Tnrc6b 213988        | -1.426613682 | 0.220190993 | -1.121471088 | 0.340053522 |
| Nacc2 67991          | -1.426634498 | 0.068137009 | -1.401498044 | 0.037987534 |
| Plekhm3 241075       | -1.426983731 | 0.287841483 | 1.117819616  | 0.428080422 |
| Dpp8 74388           | -1.426996464 | 0.145314904 | -1.1215145   | 0.322437951 |
| Prepl 213760         | -1.427051362 | 0.020543193 | -1.709882238 | 0.000744308 |
| Slc35a5 74102        | -1.427095133 | 0.151690778 | -1.842430864 | 0.050320354 |
| Fam82b 66302         | -1.427140498 | 0.032681686 | -1.563866856 | 0.004628997 |
| Slc16a12 240638      | -1.427375613 | 0.133072826 | -1.099796861 | 0.288596126 |
| Kank2 235041         | -1.427406508 | 0.022846274 | -1.297794196 | 0.038838688 |
| Gatad2b 229542       | -1.427740646 | 0.321574037 | -1.724175539 | 0.251994748 |
| Inpp5e 64436         | -1.42791305  | 0.108000739 | -1.42791305  | 0.108000739 |
| Ceacam1 26365        | -1.428038119 | 0.081338069 | -1.447033455 | 0.05611244  |
| Letm1 56384          | -1.428525892 | 0.008441055 | -1.428525892 | 0.008441055 |
| Ptafr 19204          | -1.428571429 | 0.37128647  | 1            | #DIV/0!     |
| Gm13718 100270744    | -1.428571429 | 0.37128647  | 1            | #DIV/0!     |
| Ptprt 19281          | -1.428571429 | 0.37128647  | 1            | #DIV/0!     |
| Rab27b 80718         | -1.428739018 | 0.35290708  | -2.8202      | 0.173296754 |
| Prr14 233895         | -1.429098272 | 0.00263999  | -1.429098272 | 0.00263999  |
| Asap3 230837         | -1.429129028 | 0.06895035  | -1.573594391 | 0.022681265 |
| Gm12824 666048       | -1.429236008 | 0.295131839 | -3.010586893 | 0.023511985 |
| Gm16039 100036521    | -1.42937124  | 0.062458585 | -1.828414896 | 0.005296941 |
| Tatdn3 68972         | -1.429525125 | 0.253048038 | -2.224778781 | 0.029464894 |
| Gm10069 791299       | -1.430019884 | 0.020865976 | -1.442239707 | 0.003000908 |
| Naip5 17951          | -1.430040294 | 0.209821769 | -1.096069766 | 0.41360369  |
| Slc25a10 27376       | -1.430064353 | 0.000897871 | -1.484733215 | 0.000819037 |
| Arhgap39 223666      | -1.43017911  | 0.100458316 | -1.462476779 | 0.026017378 |
| Smad6 17130          | -1.43035428  | 0.064005722 | -1.743780253 | 0.008084606 |
| Ftsjd2 74157         | -1.430400314 | 0.043262408 | -1.306731758 | 0.088797628 |
| Chac1 69065          | -1.430776931 | 0.264342869 | -1.236319846 | 0.318474282 |
| F8a 14070            | -1.43082557  | 0.051208636 | -1.547186312 | 0.021209963 |
| Adnp 11538           | -1.430953605 | 0.222669633 | -1.430953605 | 0.222669633 |
| Nckap1 105855        | -1.431470435 | 0.129230395 | -1.236306557 | 0.232018151 |
| Batf2 74481          | -1.431884415 | 0.116205616 | -2.00077619  | 0.011510981 |
| Mgst3 66447          | -1.432291424 | 0.160981507 | -1.972719678 | 0.03528883  |
| 2310021P13Rik 268721 | -1.432445271 | 0.002107989 | -1.579474223 | 0.000142126 |
| Acat3 224530         | -1.432633631 | 0.00237515  | -1.517243923 | 0.001209515 |
| Klhl18 270201        | -1.432877598 | 0.031568385 | -1.561407948 | 0.018322919 |
| 4833418N02Rik 74597  | -1.43293744  | 0.193115615 | -1.43293744  | 0.193115615 |
| Plce1 74055          | -1.433401935 | 0.158674354 | -1.433401935 | 0.158674354 |
| Rapgef5 217944       | -1.43353     | 0.33978158  | -4.56078     | 0.070574133 |

|                      |              |             |              |             |
|----------------------|--------------|-------------|--------------|-------------|
| Klhdc9 68874         | -1.433694028 | 0.10441395  | -1.712016054 | 0.042578971 |
| Wasl 73178           | -1.433696297 | 0.1678347   | -1.039843017 | 0.418214104 |
| Bcl6b 12029          | -1.433870023 | 0.217401948 | -2.355590157 | 0.034728497 |
| Prrc2c 226562        | -1.433922684 | 0.200283181 | 1.000596096  | 0.499112145 |
| Tmem8 60455          | -1.433962247 | 0.007204721 | -1.433962247 | 0.007204721 |
| Atxn1 20238          | -1.434084123 | 0.25565431  | -1.434084123 | 0.25565431  |
| Svil 225115          | -1.434192839 | 0.128494819 | -1.378872437 | 0.094839796 |
| 1700008J07Rik 629159 | -1.434499281 | 0.056783684 | -1.531676405 | 0.033507039 |
| Nnt 18115            | -1.434963029 | 0.07655749  | -1.296083202 | 0.141876348 |
| Samd9l 209086        | -1.43502139  | 0.129558858 | -1.200385188 | 0.248798071 |
| Cssp1 211660         | -1.435266156 | 0.193697118 | -1.042325139 | 0.44684692  |
| Pilra 231805         | -1.435296594 | 0.150432081 | -1.000724093 | 0.498626105 |
| Zfpm1 22761          | -1.435467476 | 0.014022953 | -1.306558597 | 0.027341203 |
| Gtf2h2 23894         | -1.435749027 | 0.150103042 | -1.400378688 | 0.077321888 |
| Ggta1 14594          | -1.436589905 | 0.229300142 | -1.204745698 | 0.344068972 |
| Bclaf1 72567         | -1.436595338 | 0.041989044 | -1.436595338 | 0.041989044 |
| 2610044O15Rik 72139  | -1.436771961 | 0.131408998 | -2.069521973 | 0.001229066 |
| Afmid 71562          | -1.436836328 | 0.002888371 | -1.514338797 | 0.000526542 |
| Pknox2 208076        | -1.437100977 | 0.274996054 | 1.012805512  | 0.49185709  |
| Dlg4 13385           | -1.437366772 | 0.219114039 | -1.768716624 | 0.082271489 |
| Tpp2 22019           | -1.437374743 | 0.065448487 | -1.117217406 | 0.251977695 |
| Cnpy3 72029          | -1.437550763 | 0.031845571 | -1.278474572 | 0.049477538 |
| Adamts5 23794        | -1.437606185 | 0.15337067  | -1.209002447 | 0.293637875 |
| 1700052K11Rik 73431  | -1.437886038 | 0.151955185 | -1.439268133 | 0.037800324 |
| Nrxn1 18189          | -1.437963687 | 0.088563516 | -1.219578275 | 0.182330686 |
| Fam110c 104943       | -1.438044073 | 0.302112836 | -2.713213277 | 0.093707629 |
| E130303B06Rik 102124 | -1.438264928 | 0.205143898 | -1.438264928 | 0.205143898 |
| Med14 26896          | -1.438311834 | 0.055906661 | -1.796364739 | 0.003022855 |
| A930018P22Rik 68243  | -1.438410057 | 0.258104673 | -1.529102287 | 0.192900919 |
| Papss2 23972         | -1.438470618 | 0.187190108 | -1.364395776 | 0.178534543 |
| Zranb2 53861         | -1.439472292 | 0.14690154  | 1.001705649  | 0.496534216 |
| Xdh 22436            | -1.43958225  | 0.006665273 | -1.43958225  | 0.006665273 |
| 4933421O10Rik 71073  | -1.439754416 | 0.238233041 | -1.999076555 | 0.029512668 |
| Ankrd1 107765        | -1.440114286 | 0.368944409 | 1            | #DIV/0!     |
| Ndrg4 234593         | -1.440114286 | 0.368944409 | 1            | #DIV/0!     |
| Nfkb1 18033          | -1.440159594 | 0.04175386  | -1.748174371 | 0.002287905 |
| Lum 17022            | -1.440195785 | 0.105733096 | -1.94256971  | 0.006463193 |
| Qrs1 76563           | -1.440338303 | 0.157025025 | -1.635736253 | 0.117501577 |
| Gm4532 100043580     | -1.440952732 | 0.295921904 | -1.440952732 | 0.295921904 |
| Dusp7 235584         | -1.441292973 | 0.096967517 | -1.717035527 | 0.038717566 |
| Cep350 74081         | -1.441375078 | 0.112705135 | -1.16935236  | 0.238713921 |
| Card10 105844        | -1.442082823 | 0.008669328 | -1.473710305 | 0.00077232  |
| Cenpq 83815          | -1.442125418 | 0.273118558 | -1.151062214 | 0.418507868 |
| Zscan21 22697        | -1.442159609 | 0.075594472 | -1.934268631 | 0.003592951 |
| Polh 80905           | -1.442373372 | 0.198265328 | -1.335404223 | 0.153686989 |
| D330041H03Rik 654822 | -1.442927896 | 0.090425467 | -1.346051559 | 0.120361229 |
| lsg15 100038882      | -1.443049456 | 0.112194827 | -1.237474831 | 0.226156539 |
| Atg14 100504663      | -1.44327192  | 0.051782966 | -1.44327192  | 0.051782966 |
| Dtwd1 69185          | -1.44371834  | 0.224056428 | -1.987550202 | 0.10942287  |
| 2610002M06Rik 67028  | -1.443858199 | 0.066450953 | -1.301079881 | 0.127102899 |
| Hrg 94175            | -1.44386135  | 0.017875484 | -1.580211678 | 0.000997944 |
| Otud3 73162          | -1.444217656 | 0.065771805 | -1.444217656 | 0.065771805 |
| 41153 54204          | -1.444745095 | 0.08737516  | -1.080274445 | 0.333757392 |

|                      |              |             |              |             |
|----------------------|--------------|-------------|--------------|-------------|
| Slc6a13 14412        | -1.445219272 | 0.001539039 | -1.432590358 | 0.000580814 |
| Fam149b 105428       | -1.445219309 | 0.002008277 | -1.344325885 | 0.002957975 |
| Acad8 66948          | -1.445266257 | 0.002743567 | -1.445266257 | 0.002743567 |
| Rab5 67286           | -1.44562565  | 0.181390292 | -2.084650138 | 0.042919347 |
| Lmnb2 16907          | -1.445638273 | 0.015518036 | -1.206059058 | 0.035863733 |
| Bcl6 12053           | -1.445665752 | 0.228533321 | -1.000862447 | 0.499173167 |
| Tbc1d9b 76795        | -1.446317836 | 0.00224171  | -1.502297333 | 0.001196548 |
| Limd2 67803          | -1.446484155 | 0.025144624 | -1.322130484 | 0.048693433 |
| Acy3 71670           | -1.446490956 | 0.003928957 | -1.344399185 | 0.003169794 |
| Arid3a 13496         | -1.446698534 | 0.154336409 | -1.449293921 | 0.05132666  |
| Rcn2 26611           | -1.44690301  | 0.165891244 | -1.350918607 | 0.182424991 |
| Card6 239319         | -1.447670088 | 0.043039876 | -1.154706439 | 0.157452714 |
| Tnfaip3 21929        | -1.447793249 | 0.095802329 | -1.426127191 | 0.077460866 |
| Gm4788 214403        | -1.448026671 | 0.124033956 | -1.782320354 | 0.049906014 |
| Otc 18416            | -1.44829233  | 0.000216898 | -1.38218248  | 0.000382114 |
| Thtpa 105663         | -1.448354057 | 0.000355908 | -1.435164813 | 0.000025943 |
| Herc2 15204          | -1.448483846 | 0.073240502 | -1.448483846 | 0.073240502 |
| Erb2 13866           | -1.44879728  | 0.185564848 | -2.571790198 | 0.003788873 |
| Serpina12 68054      | -1.449652661 | 0.196103798 | -1.902643787 | 0.096852251 |
| Sipa1l2 244668       | -1.449886089 | 0.202379935 | -1.43872661  | 0.228970451 |
| Zbtb48 100090        | -1.449917269 | 0.020959843 | -1.567202218 | 0.004270266 |
| 4632411B12Rik 226976 | -1.450070409 | 0.006257024 | -1.528277058 | 0.004914297 |
| Chst12 59031         | -1.450153009 | 0.166188199 | -1.401118061 | 0.141003461 |
| Zfp940 233057        | -1.450317158 | 0.259570295 | -1.450317158 | 0.259570295 |
| Zbtb45 232879        | -1.450611916 | 0.045753385 | -1.588161541 | 0.012565331 |
| Myo7a 17921          | -1.450648088 | 0.071675326 | -1.266973242 | 0.146581074 |
| Traf7 224619         | -1.450657283 | 0.022391662 | -1.316980626 | 0.038890241 |
| Zswim6 67263         | -1.450718447 | 0.22498762  | -1.066071587 | 0.392916051 |
| Adam9 11502          | -1.451237307 | 0.165441119 | -1.128068947 | 0.354575388 |
| Porcn 53627          | -1.451716888 | 0.032809502 | -1.366590074 | 0.038706097 |
| Rere 68703           | -1.451962512 | 0.162521852 | 1.015465975  | 0.466818736 |
| Chchd6 66098         | -1.451984092 | 0.026720656 | -1.363057088 | 0.055944953 |
| Tgm1 21816           | -1.452228062 | 0.039761528 | -1.266617979 | 0.07890805  |
| Fryl 72313           | -1.452439276 | 0.081674063 | -1.222833287 | 0.163182793 |
| Slc22a27 171405      | -1.45254537  | 0.158401415 | -1.282248059 | 0.167187685 |
| Pira2 18725          | -1.452587939 | 0.2160171   | -1.452587939 | 0.2160171   |
| Tmem170 66817        | -1.452660466 | 0.181219587 | -1.141008438 | 0.364777232 |
| Cables1 63955        | -1.452882931 | 0.208022344 | -2.066353988 | 0.061560444 |
| Epor 13857           | -1.453057542 | 0.114129757 | -1.79155886  | 0.041640091 |
| Asb7 117589          | -1.453437974 | 0.18125177  | -1.420528884 | 0.116920138 |
| Fdft1 14137          | -1.454349738 | 0.081446632 | -1.626464326 | 0.053203518 |
| Tiparp 99929         | -1.4544265   | 0.127158018 | -1.154123812 | 0.27615525  |
| Kif1b 16561          | -1.454455719 | 0.21914645  | -1.107657161 | 0.354787948 |
| Rdh10 98711          | -1.45480647  | 0.052358809 | -1.418951672 | 0.042110308 |
| Akr1b10 67861        | -1.455407743 | 0.23714079  | -1.455407743 | 0.23714079  |
| Map3k13 71751        | -1.455572987 | 0.303955644 | 1.02207559   | 0.488357997 |
| Stard3 59045         | -1.455810174 | 0.004423458 | -1.48695465  | 0.005310995 |
| Pinx1 72400          | -1.456156729 | 0.100498243 | -1.347084562 | 0.160572861 |
| Al464131 329828      | -1.456197715 | 0.000354269 | -1.517761033 | 5.56774E-05 |
| Onecut1 15379        | -1.456309479 | 0.199554082 | -1.305695676 | 0.216284419 |
| Lass4 67260          | -1.456340274 | 0.166276885 | -1.489023237 | 0.154820476 |
| Coro7 78885          | -1.456403667 | 0.00143299  | -1.530916086 | 0.000225746 |
| Npcd 504193          | -1.456781695 | 0.212782511 | -1.089391799 | 0.423871745 |

|                      |              |             |              |             |
|----------------------|--------------|-------------|--------------|-------------|
| Mipep 70478          | -1.457238227 | 0.013024255 | -1.457238227 | 0.013024255 |
| Ranbp10 74334        | -1.457291237 | 0.02806625  | -1.288577731 | 0.035860758 |
| Zfyve16 218441       | -1.457831262 | 0.177892799 | -1.618724076 | 0.151968462 |
| B3galt1 26877        | -1.458052181 | 0.119322267 | -1.214232911 | 0.247359367 |
| 8430429K09Rik 71523  | -1.458476633 | 0.220877809 | -1.102054753 | 0.420646142 |
| Anks4b 72074         | -1.458510839 | 0.009353491 | -1.721215273 | 0.000200864 |
| Hlcs 110948          | -1.458678341 | 0.100373366 | -1.771235935 | 0.037144593 |
| 5730494M16Rik 66648  | -1.458811607 | 0.039566406 | -1.134362797 | 0.088261593 |
| Stx11 74732          | -1.45882769  | 0.31429881  | -1.72578057  | 0.278974436 |
| Pms1 227099          | -1.458864122 | 0.253461464 | -1.00889755  | 0.493651787 |
| Stra13 20892         | -1.459123974 | 0.037410448 | -1.340915904 | 0.004354522 |
| Ttlf5 320244         | -1.459391788 | 0.012345278 | -1.503594787 | 0.000856636 |
| Abl2 11352           | -1.459529232 | 0.087389052 | -1.723881169 | 0.03716573  |
| Taco1 70207          | -1.459625924 | 0.002204961 | -1.633155076 | 0.000189098 |
| Gpr133 243277        | -1.459629636 | 0.259124954 | -3.822654545 | 0.005502342 |
| Nacad 192950         | -1.459718661 | 0.293278866 | -2.532914141 | 0.141518419 |
| Acat2 110460         | -1.460919167 | 0.028250156 | -1.460919167 | 0.028250156 |
| Cyp46a1 13116        | -1.46175316  | 0.037700166 | -1.30246994  | 0.071746003 |
| Zcchc6 214290        | -1.461761982 | 0.104833009 | -1.220448093 | 0.219017652 |
| Prim2 19076          | -1.461975458 | 0.145347616 | -1.802663406 | 0.012520431 |
| Per2 18627           | -1.462139737 | 0.167824301 | -1.308257241 | 0.249080515 |
| Clic5 224796         | -1.462198652 | 0.325661435 | 1.778618873  | 0.184006478 |
| A430107O13Rik 214642 | -1.462227274 | 0.253060209 | 1.109126815  | 0.407007099 |
| Gyltl1b 228366       | -1.462721788 | 0.211169425 | -1.736549835 | 0.099493143 |
| Gm13375 433408       | -1.463042255 | 0.06766784  | -1.463042255 | 0.06766784  |
| Ntn4 57764           | -1.463084175 | 0.2009768   | -2.005515889 | 0.089251163 |
| 1700106N22Rik 73582  | -1.46335636  | 0.185482229 | -1.539247025 | 0.097576844 |
| 1600012H06Rik 67912  | -1.463452866 | 0.008193733 | -1.344420529 | 0.009137575 |
| Slc35b4 58246        | -1.463512724 | 0.006143966 | -1.393133594 | 0.004040276 |
| Aqp3 11828           | -1.464023683 | 0.356831873 | 1.264185714  | 0.40907038  |
| Odf3b 70113          | -1.464068601 | 0.005975765 | -1.516139184 | 0.000243142 |
| Map4k3 225028        | -1.464090262 | 0.100784841 | -1.297421725 | 0.193376277 |
| Kifc3 16582          | -1.464330134 | 0.015614575 | -1.735026644 | 0.000526762 |
| Cyp2d37-ps 627860    | -1.464619024 | 0.022621782 | -1.553333716 | 0.011450394 |
| Ces1f 234564         | -1.464710522 | 0.022993932 | -1.466663316 | 0.002710341 |
| Polk 27015           | -1.465002439 | 0.202625066 | -2.71922527  | 0.005834538 |
| Tssc1 380752         | -1.465195766 | 0.051058323 | -1.465195766 | 0.051058323 |
| lqsec1 232227        | -1.465263481 | 0.025049502 | -1.388055254 | 0.004657442 |
| Slc9a9 331004        | -1.46530725  | 0.155582201 | -1.721040552 | 0.072867354 |
| Pcnxl3 104401        | -1.465662292 | 0.002371993 | -1.562114507 | 0.000107965 |
| Zeb2 24136           | -1.465756    | 0.184939337 | -1.654448888 | 0.152770469 |
| Ttc19 72795          | -1.466297244 | 0.003805498 | -1.391358166 | 0.008989329 |
| 5830418K08Rik 319675 | -1.466339652 | 0.095754369 | -1.466339652 | 0.095754369 |
| Klhl15 236904        | -1.46642219  | 0.270471222 | 1.048505508  | 0.469355521 |
| Dpy19l3 233115       | -1.466674886 | 0.159710116 | -1.750989158 | 0.039450828 |
| Art3 109979          | -1.466734238 | 0.26315125  | -2.342264667 | 0.12014837  |
| Ccdc84 382073        | -1.466804141 | 0.02375946  | -1.786577206 | 0.000672554 |
| 2310067B10Rik 71947  | -1.466876921 | 0.015241026 | -1.251067579 | 0.052013647 |
| Slamf6 30925         | -1.467018339 | 0.281672    | -1.467018339 | 0.281672    |
| Atp10d 231287        | -1.467046419 | 0.142613613 | -1.232010951 | 0.276412718 |
| Shq1 72171           | -1.467486765 | 0.071138529 | -1.298569027 | 0.144798725 |
| Ada 11486            | -1.467979167 | 0.024643797 | -1.378829386 | 0.049985481 |
| Sult2a2 100043194    | -1.468064937 | 0.120084449 | -1.542883851 | 0.091169911 |

|                     |              |             |              |             |
|---------------------|--------------|-------------|--------------|-------------|
| Htt 15194           | -1.468091425 | 0.027422282 | -1.439289734 | 0.003718956 |
| Cyp2d26 76279       | -1.468944096 | 0.018656262 | -1.686938189 | 0.001485459 |
| Ppp6r2 71474        | -1.46991178  | 0.005789731 | -1.603227482 | 0.001764872 |
| Glmn 170823         | -1.469923258 | 0.222558473 | -2.707837662 | 0.026031116 |
| Tmtc4 70551         | -1.469938002 | 0.287936823 | -1.469938002 | 0.287936823 |
| Numb 18222          | -1.470523844 | 0.169972799 | -1.156455507 | 0.347316326 |
| Azin1 54375         | -1.471245312 | 0.138020495 | -1.510138105 | 0.085835296 |
| Trim21 20821        | -1.471398993 | 0.122873071 | -1.225487429 | 0.25175912  |
| Ralbp1 19765        | -1.471668753 | 0.036813468 | -1.723171326 | 0.007345556 |
| Aqp4 11829          | -1.471984283 | 0.29538682  | -2.170942675 | 0.173435293 |
| Rnf123 84585        | -1.472081369 | 0.001473667 | -1.338806035 | 0.000421372 |
| Slc38a3 76257       | -1.472268026 | 0.000519579 | -1.427117294 | 0.001456888 |
| Phka2 110094        | -1.472378766 | 0.008929548 | -1.508265598 | 0.000298625 |
| Sdpr 20324          | -1.472388896 | 0.03758829  | -1.37819866  | 0.000240519 |
| Heca 380629         | -1.472654899 | 0.251976168 | -1.284468772 | 0.312401878 |
| Grik5 14809         | -1.472791787 | 0.003419432 | -1.332682706 | 0.00270429  |
| Abca1 11303         | -1.472834969 | 0.05648616  | -1.35478709  | 0.022505062 |
| H2-T24 15042        | -1.472878227 | 0.246889298 | -1.037245264 | 0.474057162 |
| Ccdc43 52715        | -1.47315803  | 0.106136284 | -1.308573748 | 0.184372527 |
| Cxcl12 20315        | -1.473161508 | 0.029017723 | -1.473161508 | 0.029017723 |
| Acp6 66659          | -1.473283456 | 0.000705058 | -1.371292614 | 0.000670214 |
| Tubg2 103768        | -1.473698636 | 0.307694868 | -1.473698636 | 0.307694868 |
| Recql 19691         | -1.474117261 | 0.216533265 | -1.640816781 | 0.136128918 |
| Rab11fip4 268451    | -1.474215435 | 0.218307709 | 1.052676819  | 0.432842182 |
| Wnk1 232341         | -1.474328901 | 0.096013152 | -1.332732589 | 0.063320271 |
| Zbtb12 193736       | -1.474451511 | 0.073281605 | -1.474451511 | 0.073281605 |
| Synj2 20975         | -1.474748755 | 0.092840159 | -1.474748755 | 0.092840159 |
| Dmpk 13400          | -1.475538908 | 0.005688678 | -1.711187398 | 0.000233829 |
| Fam125b 72543       | -1.476044049 | 0.171810232 | -1.662695703 | 0.044910888 |
| Grid1 14803         | -1.476059925 | 0.119469193 | -1.476059925 | 0.119469193 |
| Gstm2 14863         | -1.476087137 | 0.052605287 | -1.350590199 | 0.021303141 |
| Arhgap21 71435      | -1.476172754 | 0.127622251 | -1.018486348 | 0.456899951 |
| Cnpy4 66455         | -1.476269268 | 0.117102037 | -1.794883861 | 0.054135446 |
| Smyd4 319822        | -1.476955147 | 0.026664031 | -1.476955147 | 0.026664031 |
| BC068281 238037     | -1.47815767  | 0.018270029 | -1.578563292 | 0.006762852 |
| 2610306M01Rik 67170 | -1.478337524 | 0.106937274 | -1.478337524 | 0.106937274 |
| Gbp9 236573         | -1.478471734 | 0.153772574 | -1.240380228 | 0.267347524 |
| Thsd4 207596        | -1.478611787 | 0.188903348 | -1.168695951 | 0.361065484 |
| Slfn1 20555         | -1.478770805 | 0.190930906 | -2.687240445 | 0.006001337 |
| Tjp1 21872          | -1.478786278 | 0.200983086 | -1.154885254 | 0.333039919 |
| Ppcdc 66812         | -1.478802537 | 0.012586383 | -1.401355736 | 0.027526211 |
| Naa38 76522         | -1.47919432  | 0.188400201 | -1.769807268 | 0.069477116 |
| Fhdc1 229474        | -1.479478122 | 0.250216199 | 1.014209271  | 0.489677372 |
| Sec16a 227648       | -1.479495151 | 0.024468799 | -1.364774341 | 0.051240227 |
| Yeats2 208146       | -1.479495605 | 0.126304421 | -1.757580452 | 0.072693763 |
| Zfp318 57908        | -1.479553577 | 0.083974176 | -1.804885345 | 0.026309126 |
| Frs3 107971         | -1.479710277 | 0.099136148 | -1.478912103 | 0.038983274 |
| Rbm12 75710         | -1.479748573 | 0.241869957 | 1.103090603  | 0.400756507 |
| Sec14l2 67815       | -1.479966582 | 0.002121778 | -1.375641514 | 0.000935836 |
| Rbbp9 26450         | -1.480126635 | 0.045040901 | -1.297004954 | 0.092352212 |
| Dalrd3 67789        | -1.480258848 | 0.000365913 | -1.480258848 | 0.000365913 |
| Nckap1 50884        | -1.480413395 | 0.214149137 | -1.107890595 | 0.416031159 |
| Klhdc8a 213417      | -1.480725605 | 0.091430347 | -1.336510164 | 0.158333283 |

|                      |              |             |              |             |
|----------------------|--------------|-------------|--------------|-------------|
| 3110057012Rik 269423 | -1.480844637 | 0.121362884 | -1.360414587 | 0.185586248 |
| Atp6v0a2 21871       | -1.481272724 | 0.156706988 | -1.383552166 | 0.148272044 |
| Ust 338362           | -1.48129156  | 0.270775399 | -3.284075758 | 0.055632218 |
| Foxa1 15375          | -1.481332116 | 0.126703371 | -2.096283027 | 0.013971042 |
| Plcb3 18797          | -1.481478871 | 0.001267219 | -1.306944102 | 0.000694581 |
| Dhdh 71755           | -1.481960355 | 0.107974843 | -1.463900777 | 0.032744862 |
| Pet112l 229487       | -1.482412146 | 0.006429373 | -1.356087794 | 0.004620046 |
| Sec14l4 103655       | -1.482555457 | 0.003450617 | -1.409610247 | 0.007129477 |
| Cxcl10 15945         | -1.482769011 | 0.215876034 | -1.658721777 | 0.064867621 |
| Slco3a1 108116       | -1.482875621 | 0.037492958 | -1.315680429 | 0.077334148 |
| Trappc10 216131      | -1.483748626 | 0.048921064 | -1.331756774 | 0.100037651 |
| Asah2 54447          | -1.483823637 | 0.11985984  | -1.873122394 | 0.04378966  |
| Atp13a3 224088       | -1.484693592 | 0.131542272 | -1.052082502 | 0.405083768 |
| Spg11 214585         | -1.485168761 | 0.106309842 | -1.691011461 | 0.072229072 |
| Rnf43 207742         | -1.485191284 | 0.047448308 | -1.615586645 | 0.018764037 |
| Strn 268980          | -1.485681471 | 0.300017266 | 1.289727604  | 0.359609713 |
| Macrod1 107227       | -1.485996662 | 0.019867334 | -1.851471571 | 0.00010547  |
| Zkscan1 74570        | -1.486312984 | 0.047812861 | -1.486312984 | 0.047812861 |
| Tnfrsf19 29820       | -1.486674084 | 0.079983701 | -1.281185064 | 0.164155923 |
| Xylb 102448          | -1.486843642 | 0.000970242 | -1.48938423  | 0.000132647 |
| Tmem25 71687         | -1.486846333 | 0.057928967 | -1.301081012 | 0.083582828 |
| Hrsp12 15473         | -1.487071228 | 0.00093288  | -1.487071228 | 0.00093288  |
| Zfp1 22640           | -1.48724769  | 0.009934578 | -1.508692908 | 0.00293963  |
| Dnahc5 110082        | -1.487269513 | 0.331084142 | -5.916333333 | 0.093233821 |
| Rora 19883           | -1.487760538 | 0.2767688   | -1.036536884 | 0.477174813 |
| 2310044G17Rik 217732 | -1.487763119 | 0.029471283 | -1.207305157 | 0.105620549 |
| Actr3b 242894        | -1.487944268 | 0.307832802 | -1.29416451  | 0.382135102 |
| Qtrtd1 106248        | -1.488135666 | 0.246705379 | 1.056446913  | 0.45568495  |
| A430084P05Rik 327957 | -1.4883822   | 0.20201189  | -2.02464181  | 0.100561805 |
| Ghr 14600            | -1.48875941  | 0.016153418 | -1.488375312 | 0.00043116  |
| Hspb6 243912         | -1.488852311 | 0.007409224 | -1.724098884 | 0.000485027 |
| Rnf111 93836         | -1.48923041  | 0.187502816 | -1.444516733 | 0.191782791 |
| 2310009B15Rik 69549  | -1.489502684 | 0.105330594 | -1.489502684 | 0.105330594 |
| Gbas 14467           | -1.489646978 | 0.021615464 | -1.817966783 | 0.000600345 |
| 9930021D14Rik 319259 | -1.4899      | 0.170446566 | 1            | #DIV/0!     |
| Pip4k2b 108083       | -1.490129689 | 0.009184539 | -1.478757148 | 0.001029317 |
| Col12a1 12816        | -1.490684462 | 0.255553357 | -1.490684462 | 0.255553357 |
| Ccl4 20303           | -1.491799871 | 0.310527873 | -1.288457844 | 0.384067592 |
| Itgam 16409          | -1.491867768 | 0.128262088 | -2.201483243 | 0.001476175 |
| C4b 12268            | -1.491996836 | 0.002626049 | -1.579457601 | 0.000705507 |
| Echdc3 67856         | -1.492159849 | 0.011161289 | -1.758971308 | 0.000136468 |
| Ccny1 227210         | -1.492442444 | 0.095029546 | -1.569165089 | 0.050522227 |
| Gltscr1 243842       | -1.492479016 | 0.140779083 | -1.434829087 | 0.148049679 |
| Paqr9 75552          | -1.492858769 | 0.032950463 | -1.323561481 | 0.067970841 |
| Zfp955b 100043468    | -1.492925105 | 0.090864662 | -1.447061648 | 0.13259446  |
| Cyp2u1 71519         | -1.49336458  | 0.048463112 | -1.825927933 | 0.006582828 |
| Zfp341 228807        | -1.493466407 | 0.038468802 | -1.695368647 | 0.016465867 |
| D630037F22Rik 544696 | -1.493516348 | 0.127643889 | -1.277861764 | 0.243924402 |
| D3Ertd751e 73852     | -1.493540587 | 0.084337512 | -1.799421629 | 0.032594958 |
| Pbld2 67307          | -1.493708237 | 0.004489929 | -1.705321746 | 8.49155E-05 |
| Laptm4b 114128       | -1.493845885 | 0.01582581  | -1.607663945 | 0.00395722  |
| Ces2g 72361          | -1.493901673 | 0.003166108 | -1.647229375 | 0.000449878 |
| Ankrd2 56642         | -1.494155052 | 0.22024145  | -1.494155052 | 0.22024145  |

|                     |              |             |              |             |
|---------------------|--------------|-------------|--------------|-------------|
| Ptcd1 71799         | -1.494598587 | 0.000655038 | -1.562177439 | 0.000149886 |
| Atxn7l1 380753      | -1.495051263 | 0.047666674 | -1.171650097 | 0.120857842 |
| Nlrp1a 195046       | -1.495197775 | 0.185677045 | -1.186119908 | 0.352075572 |
| Usp39 28035         | -1.495235738 | 0.00761252  | -1.601754626 | 0.001277926 |
| Ano8 382014         | -1.495802614 | 0.050902947 | -1.358881265 | 0.098210184 |
| Sctr 319229         | -1.495904722 | 0.27732681  | -2.575533281 | 0.131921431 |
| C630043F03Rik 68285 | -1.496052595 | 0.034004855 | -1.341497438 | 0.070450263 |
| Pls3 102866         | -1.496138849 | 0.063028492 | -1.262225485 | 0.114077317 |
| Ednrb 13618         | -1.496638993 | 0.154222065 | -1.598382651 | 0.043135543 |
| Glb1l 74577         | -1.49765386  | 0.114330459 | -1.020594564 | 0.449986599 |
| Fzd4 14366          | -1.497856099 | 0.116581304 | -1.497856099 | 0.116581304 |
| Mup17 100039206     | -1.497870127 | 0.17797592  | -1.497870127 | 0.17797592  |
| Stom 13830          | -1.498005728 | 0.02386786  | -1.498005728 | 0.02386786  |
| Fmr1 14265          | -1.498087327 | 0.231493937 | -1.164200793 | 0.368559082 |
| Mettl21d 207965     | -1.498136764 | 0.081150829 | -1.498136764 | 0.081150829 |
| Tipin 66131         | -1.498335093 | 0.116879937 | -1.395737228 | 0.185156043 |
| Abcd2 26874         | -1.498805481 | 0.02540013  | -1.473982162 | 0.014367842 |
| Muted 17828         | -1.498846175 | 0.036042742 | -1.498846175 | 0.036042742 |
| Slc2a9 117591       | -1.499602531 | 0.014083564 | -1.499602531 | 0.014083564 |
| Purb 19291          | -1.499885699 | 0.14436561  | -1.499885699 | 0.14436561  |
| Asph 65973          | -1.500194132 | 0.053553301 | -1.32134992  | 0.108309796 |
| Abat 268860         | -1.500454026 | 0.117310147 | -1.05161417  | 0.409955809 |
| Alg6 320438         | -1.501084545 | 0.222711956 | -1.257006204 | 0.327331301 |
| Dcdc2a 195208       | -1.501338159 | 0.134333505 | -1.214377311 | 0.278311413 |
| Sgcb 24051          | -1.501567139 | 0.191299579 | -2.64465281  | 0.01343738  |
| Armc7 276905        | -1.502012397 | 0.024614331 | -1.502012397 | 0.024614331 |
| Bmi1 12151          | -1.502162921 | 0.151410065 | -1.145800653 | 0.332392828 |
| Dars2 226539        | -1.502668867 | 0.051845038 | -1.634413056 | 0.007550642 |
| Bex1 19716          | -1.502869103 | 0.194106566 | -1.502869103 | 0.194106566 |
| Dennd1a 227801      | -1.503454357 | 0.001648407 | -1.69902448  | 2.57662E-05 |
| Il10ra 16154        | -1.503827978 | 0.11531653  | -1.969232712 | 0.031628277 |
| Trpv2 22368         | -1.504237893 | 0.150134248 | -1.666499341 | 0.060709199 |
| Rap2b 74012         | -1.504243467 | 0.071909583 | -1.437509614 | 0.072077624 |
| Zfp862 58894        | -1.504567657 | 0.137137271 | -1.523761927 | 0.109981107 |
| Extl2 58193         | -1.504776557 | 0.102285621 | -1.868113815 | 0.038579031 |
| Folr2 14276         | -1.506401345 | 0.008472258 | -1.280857165 | 0.020966654 |
| Hdac11 232232       | -1.506552524 | 0.002995598 | -1.574204353 | 0.000205238 |
| Ifi204 15951        | -1.506939074 | 0.080931036 | -1.417785605 | 0.022400437 |
| Xrra1 446101        | -1.507369804 | 0.311946822 | -7.38365     | 0.04272972  |
| Igln5 210094        | -1.507484968 | 0.109380968 | -1.214251917 | 0.230911359 |
| Fam116b 69440       | -1.507533145 | 0.000739806 | -1.507533145 | 0.000739806 |
| Tube1 71924         | -1.508333333 | 0.349254813 | -2.8         | 0.173296754 |
| Lsp1 16985          | -1.508471008 | 0.121705329 | -1.791024904 | 0.017598794 |
| Serpinb1a 66222     | -1.508474339 | 0.019223356 | -1.610125566 | 0.008231104 |
| Siglecg 243958      | -1.508635178 | 0.253880384 | -1.737539682 | 0.158096304 |
| Dhfr 13361          | -1.508660926 | 0.013656682 | -1.508660926 | 0.013656682 |
| Akr1c19 432720      | -1.508695853 | 0.031276637 | -1.755321986 | 0.000811767 |
| Rnd2 11858          | -1.508797324 | 0.042796524 | -1.508797324 | 0.042796524 |
| Epb4.1l4b 54357     | -1.508811348 | 0.041715667 | -1.51407453  | 0.031371756 |
| P2ry4 57385         | -1.50885227  | 0.215300604 | 1.227376656  | 0.239691143 |
| Nphp3 74025         | -1.509040762 | 0.134205862 | -1.196308214 | 0.285174772 |
| Cstf2 108062        | -1.509091912 | 0.035243591 | -1.75247578  | 4.10506E-05 |
| Gpc3 14734          | -1.50951857  | 0.273002689 | -1.50951857  | 0.273002689 |

|                 |              |             |              |             |
|-----------------|--------------|-------------|--------------|-------------|
| Mrpl3 94062     | -1.510092432 | 0.00547365  | -1.392538714 | 0.011324991 |
| Bcar1 12927     | -1.510105512 | 0.006866557 | -1.491521531 | 0.00025248  |
| Pcmttd2 245867  | -1.510430901 | 0.175229159 | -1.483691849 | 0.176804164 |
| Foxn3 71375     | -1.510487405 | 0.152226665 | -1.206984257 | 0.308242133 |
| Pde12 211948    | -1.510539164 | 0.051525854 | -2.006570878 | 0.002558986 |
| Lipt1 623661    | -1.510635023 | 0.047218781 | -1.510635023 | 0.047218781 |
| Pin4 69713      | -1.510755134 | 0.154294329 | -1.390510301 | 0.163820519 |
| Prkar1b 19085   | -1.511303092 | 0.224961389 | -1.511303092 | 0.224961389 |
| Ank3 11735      | -1.511727827 | 0.020822015 | -1.610403447 | 0.009981094 |
| S1pr5 94226     | -1.511822398 | 0.024643093 | -1.918999013 | 0.00051879  |
| Arhgap4 171207  | -1.512811499 | 0.0788684   | -2.231098612 | 0.000913616 |
| Gm8883 667931   | -1.513437105 | 0.070203952 | -1.284755374 | 0.140689411 |
| Elk1 13712      | -1.51360668  | 0.077192836 | -1.834280496 | 0.027937938 |
| Zfp607 545938   | -1.514316768 | 0.208484421 | -1.514316768 | 0.208484421 |
| Ccdc57 71276    | -1.514578871 | 0.099893302 | -1.670286811 | 0.082113403 |
| Lnp 69605       | -1.514739211 | 0.096207927 | -1.514739211 | 0.096207927 |
| Nup88 19069     | -1.515592794 | 0.011244082 | -1.429915806 | 0.000765751 |
| Cit 12704       | -1.515719056 | 0.314578126 | -1.430775758 | 0.37678302  |
| Taf6l 225895    | -1.515952379 | 0.065113613 | -1.98626904  | 0.004416832 |
| Sepsecs 211006  | -1.516056307 | 0.184878177 | -2.112407517 | 0.079947724 |
| Stx3 20908      | -1.516136287 | 0.060377943 | -1.157172467 | 0.221114938 |
| Cd79a 12518     | -1.516365423 | 0.134219118 | -1.750236937 | 0.045774162 |
| Vps13d 230895   | -1.516400279 | 0.149602831 | -1.439741963 | 0.155211556 |
| Zfp493 72958    | -1.516463251 | 0.277624168 | -2.782858531 | 0.107709595 |
| Extl1 56219     | -1.516760788 | 0.147211329 | -1.509129036 | 0.115822404 |
| Cd247 12503     | -1.51721331  | 0.251236866 | -1.51721331  | 0.251236866 |
| Tchh 99681      | -1.517224199 | 0.066374605 | -1.122542846 | 0.258517608 |
| Olfml2b 320078  | -1.517478615 | 0.308724264 | -7.433166667 | 0.042082278 |
| Pgcp 54381      | -1.517563405 | 0.001338026 | -1.569652474 | 0.000992861 |
| Mertk 17289     | -1.517877329 | 0.187631147 | 1.079007183  | 0.404026603 |
| Ap3m2 64933     | -1.518154241 | 0.256844682 | -2.990696787 | 0.07655088  |
| Amhr2 110542    | -1.518182962 | 0.327267251 | 1.784660662  | 0.257682973 |
| Sp100 20684     | -1.51857604  | 0.002857774 | -1.750535948 | 1.89256E-05 |
| Zfp317 244713   | -1.518800815 | 0.123840478 | -1.405848325 | 0.103561095 |
| Ddx11 320209    | -1.518908275 | 0.049818344 | -1.370629081 | 0.101770888 |
| Ly75 17076      | -1.51956209  | 0.246751643 | -4.682726317 | 0.001521082 |
| Apcs 20219      | -1.52012661  | 0.018525843 | -1.666033872 | 0.002203162 |
| Mdm1 17245      | -1.520574676 | 0.294512838 | -3.345078327 | 0.117211989 |
| Tifab 212937    | -1.520772321 | 0.018912848 | -1.414957297 | 0.039975045 |
| Fn1 14268       | -1.520923236 | 0.025879952 | -1.383770419 | 0.054231374 |
| Ggn 243897      | -1.521029333 | 0.072920134 | -1.638535756 | 0.047100323 |
| Cyp2s1 74134    | -1.52114526  | 0.157292601 | -1.807174404 | 0.050826696 |
| Acnat1 230161   | -1.5212281   | 0.02012973  | -1.432852203 | 0.013011333 |
| Proz 66901      | -1.521342572 | 0.030163387 | -1.644929118 | 0.023478746 |
| Aifm3 72168     | -1.521511351 | 0.116055264 | -1.521511351 | 0.116055264 |
| Pex3 56535      | -1.521902656 | 0.05798975  | -1.519087918 | 0.044404097 |
| Atp2b4 381290   | -1.522298155 | 0.367365318 | 3.53972      | 0.173296754 |
| Zfp772 232855   | -1.52280885  | 0.25944609  | -3.253782729 | 0.065154741 |
| Ccdc141 545428  | -1.52311854  | 0.223737659 | -1.295483838 | 0.237008367 |
| Syce2 71846     | -1.523155238 | 0.084079441 | -1.711349559 | 0.029428578 |
| Tmem123 71929   | -1.523202839 | 0.083283823 | -1.287788006 | 0.171369264 |
| Trp53i11 277414 | -1.523248107 | 0.010580934 | -1.523248107 | 0.010580934 |
| Il13ra1 16164   | -1.523970239 | 0.134164119 | -1.432250229 | 0.133137108 |



|                         |              |             |              |             |
|-------------------------|--------------|-------------|--------------|-------------|
| Gpr124 78560            | -1.524887583 | 0.056914496 | -1.654181888 | 0.029539312 |
| Slc8a1 20541            | -1.524944473 | 0.245305307 | -4.699512956 | 0.001660581 |
| Thrsp 21835             | -1.52497231  | 0.047804397 | -1.308985716 | 0.0976852   |
| Abcg8 67470             | -1.525492471 | 0.005376215 | -1.57935835  | 0.000179347 |
| Mum1 68114              | -1.525710681 | 0.013714333 | -1.454782242 | 0.002707889 |
| Ankdd1b 271144          | -1.525786287 | 0.2290074   | -1.047919505 | 0.465399325 |
| Ncald 52589             | -1.525836439 | 0.00665159  | -1.298609668 | 0.009077553 |
| Cnm4 94220              | -1.526500322 | 0.040235303 | -1.399972    | 0.078296406 |
| Mup1 17840              | -1.526531324 | 0.253091567 | 1.105734307  | 0.424729409 |
| Stat2 20847             | -1.526764771 | 0.006465743 | -1.800433948 | 0.000391474 |
| Acaca 107476            | -1.527250832 | 0.003405626 | -1.429814864 | 0.005268757 |
| Slc12a7 20499           | -1.527956739 | 0.001857037 | -1.455828781 | 0.004651474 |
| BC046331 230967         | -1.528309922 | 0.049330865 | -1.676281971 | 0.037198336 |
| Kifc2 16581             | -1.528321833 | 0.019838868 | -1.779453161 | 0.003390758 |
| AU040320 100317         | -1.52882344  | 0.001749188 | -1.609781615 | 0.000442614 |
| Tbc1d2 381605           | -1.529184686 | 0.146123417 | 1.019264622  | 0.471109609 |
| Vmo1 327956             | -1.529382637 | 0.145264406 | -1.949712663 | 0.072618092 |
| Lyplal1 226791          | -1.53005767  | 0.056645677 | -1.53005767  | 0.056645677 |
| Map3k4 26407            | -1.530314435 | 0.009883361 | -1.405751439 | 0.016239913 |
| Ctsw 13041              | -1.531321838 | 0.319318683 | -4.970412121 | 0.06319026  |
| Tmem132e 270893         | -1.531531478 | 0.013556138 | -1.659423984 | 0.002429597 |
| Fgf1 14164              | -1.531544573 | 0.002566067 | -1.41832199  | 0.005034712 |
| Ogg1 18294              | -1.532184714 | 0.04296306  | -1.335836458 | 0.088277846 |
| Ctps2 55936             | -1.532364303 | 0.051907837 | -1.389014526 | 0.105019839 |
| Abcb9 56325             | -1.532390563 | 0.047808718 | -1.732254448 | 0.005725322 |
| Slc35a4 67843           | -1.532401427 | 0.013905211 | -1.532401427 | 0.013905211 |
| Kcp 333088              | -1.532556357 | 0.05606118  | -1.433490985 | 0.096409827 |
| Tmem65 74868            | -1.532876631 | 0.186629758 | -1.372437871 | 0.218920694 |
| Cd160 54215             | -1.533091694 | 0.299879933 | -10.91965    | 0.013608087 |
| Gnal 14680              | -1.533633203 | 0.068688468 | -1.653769052 | 0.043443131 |
| Mex3c 240396            | -1.533736793 | 0.243732193 | 1.006369106  | 0.495613547 |
| Wdr13 73447             | -1.533840257 | 0.063090331 | -1.711153228 | 0.001987832 |
| Adh1 11522              | -1.533938395 | 0.019177809 | -1.472619625 | 0.017722598 |
| Fgf11 14166             | -1.534145781 | 0.271652919 | -2.662060606 | 0.134533887 |
| Specc1l 74392           | -1.534320346 | 0.0471975   | -1.871310328 | 0.009451216 |
| Herc6 67138             | -1.534988017 | 0.134470283 | -1.348267492 | 0.187274235 |
| Glis1 230587            | -1.535223956 | 0.210876767 | -1.813516454 | 0.116357841 |
| Bmf 171543              | -1.535608951 | 0.123480661 | -1.080000998 | 0.39929512  |
| E130203B14Rik 320736    | -1.535793846 | 0.206727669 | -1.007012387 | 0.492731216 |
| Dmxl1 240283            | -1.53617833  | 0.230531877 | -1.285509496 | 0.283907371 |
| Intu 380614             | -1.536228289 | 0.222883798 | -1.314626311 | 0.315907644 |
| Ankrd50 99696           | -1.536249603 | 0.110513292 | -1.9106809   | 0.049907153 |
| Irf7 54123              | -1.536378216 | 0.059406537 | -1.929056466 | 0.010470071 |
| Hjurp 381280            | -1.536548627 | 0.004180591 | -1.454125073 | 0.009963771 |
| Dcbld2 73379            | -1.536752295 | 0.21198205  | -1.128656882 | 0.410237719 |
| Rbm12b 72397            | -1.537221017 | 0.190480637 | -1.02327861  | 0.471039394 |
| Spry2 24064             | -1.537350854 | 0.180367613 | -1.537350854 | 0.180367613 |
| Bphl 68021              | -1.537432683 | 0.000245044 | -1.493680782 | 0.000739557 |
| 0610010B08Rik 100039060 | -1.537479416 | 0.147803695 | -1.537479416 | 0.147803695 |
| Hnrnpul1 232989         | -1.538354991 | 0.041270362 | -1.193317948 | 0.152360177 |
| Abi1 11308              | -1.539367778 | 0.151950787 | 1.014260946  | 0.479572523 |
| Tlr11 239081            | -1.539557313 | 0.362390887 | 1            | #DIV/0!     |
| Tceal5 331532           | -1.539557313 | 0.362390887 | 1            | #DIV/0!     |

|                      |              |             |              |             |
|----------------------|--------------|-------------|--------------|-------------|
| Paqr8 74229          | -1.539628856 | 0.342115672 | -2.8         | 0.173296754 |
| Cxcr7 12778          | -1.539919236 | 0.282745318 | -1.689048841 | 0.291071893 |
| Gpr77 319430         | -1.540341574 | 0.031427692 | -1.231331259 | 0.017331506 |
| Cib2 56506           | -1.540426542 | 0.151613931 | -1.28749279  | 0.256794588 |
| Serpina3c 16625      | -1.540912438 | 0.156788928 | -1.289938604 | 0.261381144 |
| Gypc 71683           | -1.541046976 | 0.015712942 | -1.367099222 | 0.030579951 |
| Nfatc1 18018         | -1.542135058 | 0.019164574 | -1.22647523  | 0.03583598  |
| Rb1 19645            | -1.543032526 | 0.113301307 | -2.287092014 | 0.002459936 |
| F2rl1 14063          | -1.543280038 | 0.224382481 | -1.133889134 | 0.41596626  |
| Il2rb 16185          | -1.54359295  | 0.062978951 | -1.601687327 | 0.024779171 |
| 4930572J05Rik 223626 | -1.544172249 | 0.015995753 | -1.425681358 | 0.034554712 |
| Arid5b 71371         | -1.54424292  | 0.159056876 | 1.037108292  | 0.441171607 |
| Ankrd11 77087        | -1.544279603 | 0.071039435 | -1.586961286 | 0.025852154 |
| A1cf 69865           | -1.545201196 | 0.114866881 | -1.312061395 | 0.164311015 |
| Usp46 69727          | -1.54534025  | 0.075142281 | -1.348870607 | 0.142669398 |
| Camkk1 55984         | -1.545763408 | 0.315832467 | -1.122857175 | 0.457104283 |
| Colec10 239447       | -1.546011466 | 0.132218884 | -1.199282575 | 0.284564014 |
| Sh3bp1 20401         | -1.546061097 | 0.006527105 | -1.48890926  | 0.015065161 |
| Ace2 70008           | -1.546228662 | 0.166707417 | -1.830508982 | 0.066972281 |
| Sp4 20688            | -1.546898416 | 0.272699172 | 1.076102787  | 0.459919448 |
| Btk 12229            | -1.546903636 | 0.302737371 | -14.17995    | 0.015325435 |
| Abi3 66610           | -1.546974437 | 0.039237629 | -1.434651207 | 0.038771179 |
| Syne1 64009          | -1.547957115 | 0.049233429 | -1.751866847 | 0.006610097 |
| Nme4 56520           | -1.548095851 | 0.143639814 | -1.860483983 | 0.024064779 |
| Tceanc 245695        | -1.549694262 | 0.163774668 | -1.482507586 | 0.18404372  |
| Gatm 67092           | -1.550151248 | 0.054521303 | -1.986896129 | 0.006051227 |
| Fbxl2 72179          | -1.550530375 | 0.331854274 | 1            | #DIV/0!     |
| Dagla 269060         | -1.550561435 | 0.082774646 | -1.754495919 | 0.026453473 |
| Chst3 53374          | -1.550914141 | 0.037644271 | -1.677830215 | 0.031418045 |
| Dag1 13138           | -1.55113971  | 0.15022694  | -1.982523362 | 0.080569493 |
| Prkd3 75292          | -1.551670904 | 0.037767787 | -1.22086756  | 0.104870306 |
| Dmrta1 242523        | -1.552081021 | 0.291013488 | -3.617771345 | 0.113887469 |
| Snx16 74718          | -1.55208659  | 0.103273243 | -1.55208659  | 0.103273243 |
| Ccr5 12774           | -1.552198458 | 0.089102087 | -1.300542876 | 0.174614347 |
| Dennd2d 72121        | -1.552746625 | 0.115716178 | -1.988226557 | 0.047585971 |
| Slc10a1 20493        | -1.552925337 | 0.002995821 | -1.330018668 | 0.004158503 |
| Ccdc76 229780        | -1.553313607 | 0.223945921 | -1.137163103 | 0.415313841 |
| Birc3 11796          | -1.553383926 | 0.101073897 | -1.553383926 | 0.101073897 |
| Galnt7 108150        | -1.553926582 | 0.225922661 | -3.188621513 | 0.039634992 |
| Tnfrsf4 22163        | -1.554061514 | 0.262476572 | -1.554061514 | 0.262476572 |
| Ptpn14 19250         | -1.55436246  | 0.149130489 | -1.858823969 | 0.043065603 |
| Ppp1r13b 21981       | -1.554976536 | 0.006562489 | -1.420398268 | 0.013645139 |
| Plekha2 83436        | -1.555223688 | 0.043207639 | -1.377268958 | 0.087283579 |
| Il12rb2 16162        | -1.555477331 | 0.253190296 | -3.4218599   | 0.063814866 |
| Epas1 13819          | -1.555639074 | 0.11208802  | -1.417586456 | 0.09515356  |
| Pcgf1 69837          | -1.555702505 | 0.210870334 | -1.775696054 | 0.139631926 |
| Dtx1 14357           | -1.556090388 | 0.093477639 | -2.016836725 | 0.026639682 |
| Trp53bp1 27223       | -1.556273292 | 0.028607234 | -1.359528879 | 0.058484334 |
| Evi2b 216984         | -1.556433618 | 0.156672324 | -1.47891201  | 0.148792405 |
| Asb10 117590         | -1.55650523  | 0.338984102 | -2.8         | 0.173296754 |
| Eif2ak4 27103        | -1.556705952 | 0.177449468 | -1.130054459 | 0.38310223  |
| Dnahc2 327954        | -1.557275672 | 0.314234734 | -6.194816667 | 0.093788939 |
| Retnla 57262         | -1.557275672 | 0.314234734 | -6.194816667 | 0.093788939 |

|                     |              |             |              |             |
|---------------------|--------------|-------------|--------------|-------------|
| Pm20d1 212933       | -1.557305397 | 0.006025764 | -1.501308667 | 0.013495647 |
| Klhl20 226541       | -1.558042137 | 0.126016381 | -2.310722562 | 0.017741065 |
| Slc22a1 20517       | -1.558595984 | 0.001095457 | -1.452766073 | 0.000533831 |
| Mir425 723864       | -1.55896843  | 0.297835998 | -2.283448485 | 0.141958073 |
| Bcl2l11 12125       | -1.559192274 | 0.048413105 | -1.596867965 | 0.01335335  |
| Fnbp1 214459        | -1.559560132 | 0.146142457 | -1.224699442 | 0.300870114 |
| Rnase4 58809        | -1.560106934 | 0.027657104 | -1.722772698 | 0.018004709 |
| Ctcf 664799         | -1.560538386 | 0.198798634 | -3.656357477 | 0.004133968 |
| Prkcdp 109042       | -1.560583447 | 0.25532231  | 1.187473196  | 0.364326203 |
| Ino80 68142         | -1.560708842 | 0.039527286 | -1.747208002 | 0.006334326 |
| Jak3 16453          | -1.561009675 | 0.00556943  | -1.436819304 | 0.00732906  |
| Slc26a10 216441     | -1.56190716  | 0.077445912 | -1.467652978 | 0.121017091 |
| Gclc 14629          | -1.561960846 | 0.151484842 | -1.38543239  | 0.219444859 |
| Lilrb3 18733        | -1.562039624 | 0.064971738 | -1.658415695 | 0.009069945 |
| Alkbh8 67667        | -1.562932543 | 0.248695232 | -3.308206487 | 0.035640116 |
| Cd1d2 12480         | -1.563008714 | 0.242443375 | -3.208217213 | 0.034403315 |
| Krt7 110310         | -1.563714783 | 0.14221993  | -1.747006612 | 0.055263716 |
| Dntt 21673          | -1.563822097 | 0.198843721 | -1.066646823 | 0.441770604 |
| Rab11fip2 74998     | -1.563982825 | 0.126488707 | -1.232244404 | 0.267532215 |
| Cyp2c44 226143      | -1.564090586 | 0.008526893 | -1.836446386 | 3.07219E-06 |
| Plcx2 433022        | -1.56414291  | 0.194146542 | -1.064439044 | 0.440141993 |
| Saa3 20210          | -1.565067281 | 0.168213539 | -2.833616052 | 0.011648592 |
| Elovl6 170439       | -1.565209541 | 0.046376743 | -1.211402148 | 0.174741134 |
| Reck 53614          | -1.565453361 | 0.203050189 | -1.813406579 | 0.153955159 |
| Pion 212167         | -1.565776387 | 0.016611764 | -1.791163955 | 0.004884137 |
| Rttm 246102         | -1.566244922 | 0.208300982 | -2.28030796  | 0.072602753 |
| Ptpru 19273         | -1.566285346 | 0.16644851  | -1.245768609 | 0.318402683 |
| Tprn 97031          | -1.566297379 | 0.030766071 | -1.451223225 | 0.063761831 |
| Zfp384 269800       | -1.56635453  | 0.061543931 | -1.56635453  | 0.061543931 |
| Ints1 68510         | -1.566543591 | 0.001067908 | -1.731142159 | 0.000104317 |
| Wls 68151           | -1.566866546 | 0.151699333 | -1.566866546 | 0.151699333 |
| Rwdd3 66568         | -1.567096365 | 0.058597882 | -1.602897003 | 0.011611658 |
| Cyth4 72318         | -1.567247431 | 0.152257241 | -2.924262337 | 0.00201497  |
| Slc6a17 229706      | -1.567666196 | 0.311763001 | -6.23615     | 0.093645599 |
| Cilp 214425         | -1.567666196 | 0.311763001 | -6.23615     | 0.093645599 |
| Igj 16069           | -1.567666196 | 0.311763001 | -6.23615     | 0.093645599 |
| Ncor1 20185         | -1.567815852 | 0.062942358 | -1.163717895 | 0.179193152 |
| Nfatc2 18019        | -1.568987676 | 0.287456513 | 1.238734538  | 0.392280275 |
| Diap2 54004         | -1.569185673 | 0.194028966 | -1.225974571 | 0.26054405  |
| Ddi2 68817          | -1.569845165 | 0.152969036 | -1.569845165 | 0.152969036 |
| Lcp2 16822          | -1.569937325 | 0.151550102 | -2.888316914 | 0.002883122 |
| Cdca8 52276         | -1.570199787 | 0.247533163 | -2.267464698 | 0.139822829 |
| Usp3 235441         | -1.571399183 | 0.000573822 | -1.673211273 | 0.000310782 |
| 4931406C07Rik 70984 | -1.57149936  | 0.023385543 | -1.458956176 | 0.047633177 |
| Sh3bgrl2 212531     | -1.572078412 | 0.112175845 | -1.269252286 | 0.234074021 |
| Galnt4 14426        | -1.572161332 | 0.150102821 | -1.199179146 | 0.317891669 |
| Atoh8 71093         | -1.572369502 | 0.034916158 | -1.714631852 | 0.027693195 |
| Megf9 230316        | -1.572435837 | 0.283106416 | 1.025747745  | 0.472973442 |
| Figl 60344          | -1.572452599 | 0.058329299 | -1.353616681 | 0.117598797 |
| Gpr125 70693        | -1.572662866 | 0.000378931 | -1.506556793 | 0.000109425 |
| Gstm5 14866         | -1.573417194 | 0.076883171 | -1.887444903 | 0.037398498 |
| Ccdc151 77609       | -1.573592048 | 0.044248656 | -1.788047916 | 0.0256689   |
| Oas1c 114643        | -1.575329309 | 0.158573102 | -1.210390234 | 0.325467108 |

|                         |              |             |              |             |
|-------------------------|--------------|-------------|--------------|-------------|
| Rassf8 71323            | -1.575523509 | 0.224649525 | -1.007915804 | 0.482975275 |
| Ccdc34 68201            | -1.575791103 | 0.163668065 | -1.723982197 | 0.138750165 |
| Nup160 59015            | -1.576662975 | 0.190471665 | -3.232031681 | 0.009217895 |
| Kif21b 16565            | -1.576690535 | 0.081270601 | -1.31705013  | 0.161102552 |
| Ggt6 71522              | -1.576786677 | 0.000573074 | -1.576786677 | 0.000573074 |
| Trim23 81003            | -1.576882422 | 0.267584621 | 1.090316231  | 0.452439847 |
| 9430008C03Rik 68108     | -1.577083277 | 0.066728194 | -1.29168521  | 0.118536748 |
| Mnda 100040462          | -1.577635105 | 0.019426403 | -1.370227576 | 0.036628176 |
| 9130409I23Rik 619326    | -1.577715255 | 0.140743766 | -2.197820113 | 0.049151217 |
| 5033411D12Rik 192136    | -1.578439521 | 0.010683043 | -1.578439521 | 0.010683043 |
| Apbb1 11785             | -1.578542446 | 0.09643818  | -2.198856559 | 0.015220117 |
| 2210404O07Rik 72273     | -1.578640504 | 0.240504669 | -4.107081102 | 0.028677687 |
| Acvrl1 11482            | -1.579701192 | 0.026089688 | -1.23395639  | 0.071260462 |
| Ola1 67059              | -1.579948672 | 0.011754106 | -1.860343488 | 0.000238838 |
| Fam113a 319513          | -1.580073478 | 0.00019613  | -1.580073478 | 0.00019613  |
| Casp12 12364            | -1.580135052 | 0.273237139 | 1.02527114   | 0.487743454 |
| Gm10516 100038712       | -1.581886266 | 0.010852052 | -1.393064285 | 0.018881386 |
| Taf1d 75316             | -1.582048877 | 0.141991553 | -2.008958014 | 0.079546392 |
| 40975 57438             | -1.582110592 | 0.234129594 | 1.012862175  | 0.490946164 |
| Spred2 114716           | -1.582140399 | 0.233458877 | -1.510815282 | 0.274581911 |
| Trex1 22040             | -1.58250949  | 0.033534937 | -1.566935402 | 0.009339279 |
| Crygn 214301            | -1.582712354 | 0.251887384 | 1.119528457  | 0.422542708 |
| 1810029B16Rik 66282     | -1.582815493 | 0.038530843 | -1.322555508 | 0.074101905 |
| Camsap3 69697           | -1.583209823 | 0.005532922 | -1.567087977 | 0.000518612 |
| Il27ra 50931            | -1.583463064 | 0.129113721 | -1.3220787   | 0.23266195  |
| Rai14 75646             | -1.583648545 | 0.077624609 | -1.328300371 | 0.159054097 |
| Rapgef6 192786          | -1.58388196  | 0.150558546 | -1.58388196  | 0.150558546 |
| Hmgxb4 70823            | -1.584164385 | 0.186108392 | -1.693590956 | 0.151363868 |
| Pgap2 233575            | -1.584262065 | 0.082007572 | -2.235697491 | 0.004139097 |
| 1700028J19Rik 70004     | -1.584343213 | 0.299197086 | -2.8         | 0.173296754 |
| 2700029M09Rik 72612     | -1.584752165 | 0.024985367 | -2.018152653 | 0.001507516 |
| Tpcn2 233979            | -1.585587808 | 0.041939432 | -1.585587808 | 0.041939432 |
| Setbp1 240427           | -1.585594755 | 0.277293131 | -4.343232323 | 0.079035869 |
| Alg10b 380959           | -1.585639549 | 0.246129189 | 1.048000444  | 0.436850153 |
| 9330020H09Rik 100048895 | -1.585894853 | 0.130526848 | -1.030491862 | 0.458912256 |
| Kcns3 238076            | -1.585940474 | 0.353523693 | 1            | #DIV/0!     |
| Zfp935 71508            | -1.586437222 | 0.161089254 | -1.290707975 | 0.298255924 |
| Insig1 231070           | -1.58677896  | 0.070207322 | -1.558178959 | 0.049390727 |
| Zdhhc24 70605           | -1.587267951 | 0.03704918  | -1.372648455 | 0.064465422 |
| Pvrl3 58998             | -1.587363094 | 0.012632247 | -1.696692159 | 0.005143478 |
| 4833422F24Rik 74614     | -1.587378851 | 0.160296973 | -1.230304356 | 0.321357002 |
| Xkr8 381560             | -1.588057431 | 0.01804917  | -1.261048225 | 0.027093718 |
| Mid1ip1 68041           | -1.588248879 | 0.079805227 | -1.156966176 | 0.206010451 |
| Slc9a3r1 26941          | -1.588398709 | 0.00095291  | -1.499063652 | 0.002297965 |
| Il33 77125              | -1.588916087 | 0.261312272 | -2.838589444 | 0.129383442 |
| Ctso 229445             | -1.589092008 | 0.003275623 | -1.484506229 | 0.005401749 |
| Hexim2 71059            | -1.589731553 | 0.140672848 | -2.455375598 | 0.025631666 |
| Myoz3 170947            | -1.589744687 | 0.297810565 | -2.8202      | 0.173296754 |
| Phldb2 208177           | -1.589927734 | 0.031288211 | -1.382409003 | 0.051233173 |
| Fam123b 72345           | -1.590179181 | 0.158706029 | -2.868501068 | 0.006925345 |
| Txndc16 70561           | -1.591221906 | 0.143922109 | -1.007048633 | 0.491058321 |
| Scara3 219151           | -1.591455113 | 0.135393467 | -1.496103475 | 0.164141594 |
| BC020402 407824         | -1.591730968 | 0.120606103 | -1.573862376 | 0.144898997 |

|                      |              |             |              |             |
|----------------------|--------------|-------------|--------------|-------------|
| Abi3bp 320712        | -1.592097235 | 0.137861964 | -1.592097235 | 0.137861964 |
| Dnajc16 214063       | -1.592286937 | 0.041684871 | -1.96751655  | 0.008394212 |
| Mblac2 72852         | -1.592689311 | 0.146211849 | -1.592689311 | 0.146211849 |
| Nr3c1 14815          | -1.59334996  | 0.095376901 | -1.532377656 | 0.070463265 |
| Abcd1 11666          | -1.593375591 | 0.000682676 | -1.593375591 | 0.000682676 |
| Loxl3 16950          | -1.594047941 | 0.10109697  | -2.225364137 | 0.019770006 |
| Mll3 231051          | -1.594889282 | 0.21688583  | -1.173715417 | 0.366116169 |
| P2ry13 74191         | -1.596058647 | 0.094637108 | -1.302469298 | 0.196335649 |
| Gnptab 432486        | -1.596981551 | 0.06430132  | -1.695889875 | 0.0431622   |
| Tmem184a 231832      | -1.597388062 | 0.01165997  | -1.597388062 | 0.01165997  |
| Sult5a1 57429        | -1.59739801  | 0.037313021 | -1.853070255 | 0.017076296 |
| Zfp583 213011        | -1.597606238 | 0.296561254 | -2.8         | 0.173296754 |
| Angptl1 72713        | -1.597606238 | 0.296561254 | -2.8         | 0.173296754 |
| Ccdc78 381077        | -1.597798717 | 0.317446086 | -2.8202      | 0.173296754 |
| Ccdc152 100039139    | -1.599299906 | 0.247007752 | -2.753551128 | 0.120180084 |
| Myl6b 216459         | -1.599568176 | 0.198995047 | -1.077313758 | 0.435909646 |
| Asb3 65257           | -1.600680045 | 0.100566965 | -1.914208325 | 0.012363994 |
| Siglec1 20612        | -1.601055184 | 0.186770571 | -1.794245103 | 0.150294882 |
| Sipa1l3 74206        | -1.602222035 | 0.02378125  | -1.433781478 | 0.045166297 |
| Rpgrip1l 244585      | -1.602267462 | 0.256403677 | -4.183444187 | 0.058973421 |
| Smg1 233789          | -1.602363637 | 0.104484263 | -1.468566314 | 0.098274668 |
| Dock2 94176          | -1.602983316 | 0.093567904 | -1.950569294 | 0.0504774   |
| Cdk3-ps 69681        | -1.603007712 | 0.295191603 | -2.8202      | 0.173296754 |
| Gm14308 100043381    | -1.604712685 | 0.199127463 | -2.835007566 | 0.055122727 |
| Sord 20322           | -1.604801779 | 0.005818919 | -1.564435148 | 0.000792504 |
| Fbxo5 67141          | -1.605098455 | 0.229824007 | -1.023197358 | 0.484630668 |
| Bicc1 83675          | -1.60532342  | 0.235710905 | -2.068929547 | 0.183148971 |
| Arid4b 94246         | -1.605340717 | 0.152807412 | -1.213869927 | 0.320646688 |
| Xist 213742          | -1.605484827 | 0.08682832  | -1.242973834 | 0.14850238  |
| Abca2 11305          | -1.605550103 | 0.001991723 | -1.477399521 | 0.000997897 |
| Xlr3a 22445          | -1.60577638  | 0.18241962  | -1.60577638  | 0.18241962  |
| Zfp865 319748        | -1.605808057 | 0.025868078 | -2.027117134 | 0.001320744 |
| 4930412C18Rik 320152 | -1.605988331 | 0.1480522   | -1.278922803 | 0.290967519 |
| Cyb5r4 266690        | -1.606032761 | 0.111790391 | -1.664424334 | 0.070263358 |
| Zbtb38 245007        | -1.606506029 | 0.186260142 | -1.322969275 | 0.282680438 |
| Cpt1c 78070          | -1.606613599 | 0.186140156 | -1.606613599 | 0.186140156 |
| Car15 80733          | -1.60662548  | 0.253003047 | -2.020938106 | 0.219451422 |
| Slc28a2 269346       | -1.606807507 | 0.258054881 | -4.627698349 | 0.050034393 |
| Phip 83946           | -1.607075249 | 0.142358957 | -1.873021199 | 0.062413192 |
| Car13 71934          | -1.607640514 | 0.350174696 | 1            | #DIV/0!     |
| Nkd2 72293           | -1.607640514 | 0.350174696 | 1            | #DIV/0!     |
| Zfp7 223669          | -1.607716728 | 0.028615563 | -1.470776146 | 0.004649246 |
| Erb3 13867           | -1.607808997 | 0.190322354 | -1.12423708  | 0.40485186  |
| Ikbp1 67454          | -1.607825458 | 0.102975081 | -1.346793396 | 0.189860869 |
| 4933407K13Rik 74396  | -1.608110114 | 0.293443847 | -1.454545455 | 0.37214076  |
| 6720401G13Rik 103012 | -1.608396755 | 0.080528125 | -1.453199717 | 0.072791897 |
| Ppp1r9a 243725       | -1.608453959 | 0.235170179 | -1.02931305  | 0.463159745 |
| Cdc40 71713          | -1.608686171 | 0.249954545 | -3.398344211 | 0.051109741 |
| Selplg 20345         | -1.608799224 | 0.040689258 | -1.608799224 | 0.040689258 |
| Cenpc1 12617         | -1.608948056 | 0.177496276 | -1.608948056 | 0.177496276 |
| Gstm6 14867          | -1.609527409 | 0.015350337 | -1.486017978 | 0.004260455 |
| Lect2 16841          | -1.609946078 | 0.011292485 | -1.609946078 | 0.011292485 |
| Syde2 214804         | -1.609948149 | 0.124486078 | -2.123796245 | 0.055342287 |

|                         |              |             |              |             |
|-------------------------|--------------|-------------|--------------|-------------|
| Hao1 15112              | -1.610301958 | 0.001729455 | -1.654655661 | 9.40692E-05 |
| Slc2a2 20526            | -1.611415528 | 0.047561519 | -1.226845521 | 0.16636865  |
| Ccnt1 12455             | -1.611489724 | 0.224350974 | -1.078904146 | 0.451018    |
| Pkd1 18763              | -1.611926992 | 0.030291207 | -1.611926992 | 0.030291207 |
| Grin3b 170483           | -1.612074938 | 0.201310347 | -1.612074938 | 0.201310347 |
| Arhgef9 236915          | -1.612867491 | 0.079194972 | -1.642375884 | 0.043377631 |
| Zfp758 224598           | -1.613180905 | 0.182214255 | -1.190080651 | 0.366167061 |
| Myef2 17876             | -1.613511034 | 0.167879211 | -2.133325372 | 0.060550937 |
| B930003M22Rik 100526796 | -1.614297864 | 0.274113798 | -6.42165     | 0.04426109  |
| Pls1 102502             | -1.614305727 | 0.254026732 | -2.511332479 | 0.158381868 |
| Numb1 18223             | -1.615375928 | 0.039611248 | -1.234805345 | 0.147526917 |
| Ly6g6e 70274            | -1.616026667 | 0.285301413 | -8.080133333 | 0.046315002 |
| Shisa5 66940            | -1.616223989 | 8.91539E-06 | -1.761838275 | 1.22053E-07 |
| Znhit3 448850           | -1.616533669 | 0.128844444 | -1.656004257 | 0.072259519 |
| Tusc3 80286             | -1.616901573 | 0.133672777 | -2.458370216 | 0.028668526 |
| Spock2 94214            | -1.618231609 | 0.247870828 | -1.637938004 | 0.215939844 |
| Myrip 245049            | -1.619002205 | 0.31126629  | 1.823071741  | 0.250512967 |
| Npr2 230103             | -1.619130519 | 0.003148973 | -1.421943694 | 0.006863266 |
| Cpsf7 269061            | -1.619175447 | 0.047628627 | -1.254342679 | 0.091115778 |
| Ppapdc1b 71910          | -1.619298816 | 0.001842607 | -1.378268124 | 0.001332744 |
| Arsb 11881              | -1.619623499 | 0.001363903 | -1.619623499 | 0.001363903 |
| Scaper 244891           | -1.619632501 | 0.11859522  | -2.832202974 | 0.00359722  |
| Cabp2 29866             | -1.620456764 | 0.272972998 | -6.44615     | 0.04497135  |
| Nudt12 67993            | -1.620652802 | 0.204779744 | -2.444157559 | 0.103671955 |
| Large 16795             | -1.621364969 | 0.09497313  | -2.368311853 | 0.011457857 |
| Larp4b 217980           | -1.622030347 | 0.162117107 | -1.281970475 | 0.190925481 |
| Glcci1 170772           | -1.622143198 | 0.199467428 | -1.047433818 | 0.459494493 |
| A430110N23Rik 269855    | -1.622460676 | 0.09083142  | -1.284983229 | 0.093524385 |
| Ccdc89 70054            | -1.62251392  | 0.2717845   | -6.454333333 | 0.043911777 |
| Cdk5r1 12569            | -1.622563333 | 0.284264933 | -8.112816667 | 0.047356131 |
| Cav2 12390              | -1.62319493  | 0.15215857  | -2.209583687 | 0.074992497 |
| Hhip 15245              | -1.623768002 | 0.134440853 | -1.460592413 | 0.170095797 |
| Il1b 16176              | -1.623929196 | 0.192095453 | -1.782149709 | 0.133382615 |
| Ltb4r1 16995            | -1.624538456 | 0.027808575 | -1.271838585 | 0.096780712 |
| Fkbp1b 14226            | -1.624688389 | 0.271784804 | -6.462983333 | 0.044795474 |
| Nsun3 106338            | -1.624832109 | 0.115680412 | -1.624832109 | 0.115680412 |
| Prickle2 243548         | -1.624842868 | 0.107712667 | -2.031931907 | 0.044971069 |
| Ddah1 69219             | -1.625440616 | 0.013131479 | -1.547323704 | 0.026970996 |
| Mapk12 29857            | -1.625834319 | 0.095305676 | -1.625834319 | 0.095305676 |
| Appbp2 66884            | -1.62748941  | 0.084068519 | -1.953092216 | 0.005921471 |
| Ica1 15893              | -1.627911341 | 0.102823563 | -1.362594106 | 0.205536844 |
| Paccin1 23969           | -1.62808083  | 0.212708546 | -2.908171717 | 0.075151509 |
| Lrit1 239037            | -1.628142449 | 0.123067643 | -2.559747366 | 0.007642996 |
| Phc3 241915             | -1.628509648 | 0.063399717 | -2.074612736 | 0.018071976 |
| Gng7 14708              | -1.628536858 | 0.109967806 | -1.945856217 | 0.020854713 |
| Lrch3 70144             | -1.629054461 | 0.262860453 | 1.210611987  | 0.384563535 |
| Naa30 70646             | -1.629522478 | 0.0594977   | -1.424042006 | 0.074597628 |
| 5330417C22Rik 229722    | -1.629993496 | 0.19585666  | -1.82274941  | 0.17333311  |
| Tcf12 21406             | -1.630285214 | 0.102356831 | -1.630285214 | 0.102356831 |
| Sfrs18 66625            | -1.630940582 | 0.117145    | -1.182497077 | 0.233776538 |
| Nrp1 18186              | -1.631108769 | 0.019518308 | -1.682042165 | 0.007617073 |
| Vamp1 22317             | -1.631159012 | 0.072533165 | -1.807490381 | 0.061462579 |
| G6pdx 14381             | -1.631228551 | 0.066506323 | -1.631228551 | 0.066506323 |

|                      |              |             |              |             |
|----------------------|--------------|-------------|--------------|-------------|
| Rgs5 19737           | -1.632196258 | 0.18771404  | -1.993502383 | 0.145855161 |
| Itih4 16427          | -1.632375743 | 0.025295859 | -1.44972895  | 0.04770136  |
| Tarsl2 272396        | -1.63267133  | 0.043386648 | -1.781245239 | 0.020964843 |
| Rrad 56437           | -1.632904445 | 0.269476835 | -6.495666667 | 0.044433779 |
| Clec2h 94071         | -1.632904445 | 0.269476835 | -6.495666667 | 0.044433779 |
| Snord93 100217436    | -1.632904445 | 0.269476835 | -6.495666667 | 0.044433779 |
| Lass1 93898          | -1.632904445 | 0.269476835 | -6.495666667 | 0.044433779 |
| Rtel1 269400         | -1.632980793 | 0.049533021 | -1.424600986 | 0.100871593 |
| Dok3 27261           | -1.633353868 | 0.037445446 | -2.063967505 | 0.005749858 |
| Gpr12 14738          | -1.634120753 | 0.19207759  | -1.634120753 | 0.19207759  |
| Cyp2j9 74519         | -1.63424655  | 0.065615146 | -1.135246198 | 0.247652736 |
| B230217C12Rik 68127  | -1.634362759 | 0.255029243 | -13.76916    | 2.35691E-05 |
| I830012O16Rik 667370 | -1.634676243 | 0.070361761 | -1.386187036 | 0.143936113 |
| Orm3 18407           | -1.634963816 | 0.077880214 | -1.636219163 | 0.023821232 |
| Scnn1a 20276         | -1.635003634 | 0.002323471 | -1.736852002 | 0.002103379 |
| Lrit2 239038         | -1.635133867 | 0.117350692 | -2.097900437 | 0.039394864 |
| Pip4k2a 18718        | -1.635214119 | 0.027472804 | -1.793956034 | 0.007386502 |
| Srrd 70118           | -1.635214449 | 0.037406883 | -1.681656109 | 0.02287575  |
| Adamts10 224697      | -1.635535693 | 0.045347646 | -2.032984921 | 0.000624214 |
| Klf1 16596           | -1.635737403 | 0.008185294 | -1.370620793 | 0.018333029 |
| Lgals4 16855         | -1.636113995 | 0.001853017 | -1.503209752 | 0.00091684  |
| Tbl1x 21372          | -1.636134746 | 0.183354483 | -1.767484564 | 0.083374674 |
| Endod1 71946         | -1.636675691 | 0.081294888 | -1.862142448 | 0.028410415 |
| Mdk 17242            | -1.637959816 | 0.195901697 | -2.081950954 | 0.044897724 |
| Cyb5b 66427          | -1.638113553 | 0.000511412 | -1.531381791 | 0.000232689 |
| Dgkq 110524          | -1.638394691 | 0.072170787 | -1.638394691 | 0.072170787 |
| Prkd2 101540         | -1.638398829 | 0.026367702 | -1.291836643 | 0.062095083 |
| Nfam1 74039          | -1.638757528 | 0.047373772 | -1.638757528 | 0.047373772 |
| Adora2a 11540        | -1.638883825 | 0.063005492 | -2.412988768 | 0.001225    |
| Chchd8 68185         | -1.639252525 | 0.01359365  | -1.338164261 | 0.0427362   |
| Rpap1 68925          | -1.639899787 | 0.02235921  | -1.578653155 | 0.001716884 |
| Faim3 69169          | -1.639978841 | 0.170118073 | -1.788640801 | 0.155634446 |
| Rad21 19357          | -1.641253737 | 0.166556833 | -1.086201725 | 0.400102845 |
| Gli1 14632           | -1.641900542 | 0.329677389 | 1.621721864  | 0.33676256  |
| Rasal2 226525        | -1.642401147 | 0.113198512 | -1.370979133 | 0.18136733  |
| Cramp1 57354         | -1.642735043 | 0.212893245 | -1.21077619  | 0.345315059 |
| Slc39a5 72002        | -1.642814631 | 0.034238881 | -1.752130171 | 0.009431005 |
| Papolg 216578        | -1.642904021 | 0.144825611 | -1.256830723 | 0.299424643 |
| Nfkbie 18037         | -1.643262124 | 0.100627488 | -2.124531625 | 0.007885477 |
| Ankra2 68558         | -1.64333539  | 0.026045703 | -1.512260153 | 0.054684224 |
| Zfp606 67370         | -1.643519059 | 0.075063497 | -1.182205812 | 0.249209277 |
| Leap2 259301         | -1.643582931 | 0.030210708 | -1.862290744 | 0.018268937 |
| Zfp956 101197        | -1.643717108 | 0.066101169 | -1.427422856 | 0.134202797 |
| Tnfsf14 50930        | -1.643830208 | 0.234907367 | -1.906558976 | 0.209895125 |
| Myo1g 246177         | -1.643987065 | 0.069536326 | -2.693347977 | 1.18394E-05 |
| Pcolce2 76477        | -1.644198633 | 0.062303198 | -1.945291742 | 0.010044334 |
| Serpina6 12401       | -1.644225267 | 0.088336707 | -2.599971481 | 0.002468242 |
| Xrcc4 108138         | -1.644439638 | 0.028398744 | -1.450624736 | 0.053819734 |
| Tyk2 54721           | -1.645122966 | 0.012413625 | -1.666694069 | 0.00715312  |
| 2700094K13Rik 72657  | -1.645622937 | 0.039741059 | -1.598558068 | 0.013738932 |
| Rdm1 66599           | -1.645728289 | 0.038619136 | -1.870257322 | 0.004659062 |
| Adam19 11492         | -1.646225397 | 0.158558999 | -1.903768073 | 0.098509017 |
| Cep78 208518         | -1.646481101 | 0.092331762 | -2.287550754 | 0.021684298 |

|                      |              |             |              |             |
|----------------------|--------------|-------------|--------------|-------------|
| Cstad 78617          | -1.646971955 | 0.260467465 | -1.637078639 | 0.293631698 |
| Neat1 66961          | -1.64762945  | 0.076020943 | -1.182932461 | 0.264929275 |
| Rundc1 217201        | -1.64798201  | 0.004625089 | -1.823874468 | 0.001257236 |
| Agrn 11603           | -1.648871648 | 0.060439478 | -1.369207618 | 0.116611081 |
| Mast1 56527          | -1.64975439  | 0.284679928 | -8.96592     | 0.022859172 |
| Slc9a6 236794        | -1.650093248 | 0.017680498 | -1.613249791 | 0.004358599 |
| Cd84 12523           | -1.650736664 | 0.067999225 | -1.404855536 | 0.139018086 |
| Gm17296 212728       | -1.650874603 | 0.165083139 | -1.945969931 | 0.123409541 |
| Pml 18854            | -1.651119128 | 4.91955E-05 | -1.59584458  | 9.32477E-05 |
| Zfp174 385674        | -1.651421139 | 0.127429645 | -3.123575722 | 0.002547196 |
| Slc4a9 240215        | -1.651864552 | 0.198770972 | -1.014013088 | 0.486720651 |
| Gckr 231103          | -1.652657226 | 0.001837315 | -1.652657226 | 0.001837315 |
| Naalad2 72560        | -1.652993175 | 0.275238286 | -8.096966667 | 0.046064383 |
| Car14 23831          | -1.653632512 | 0.000139617 | -1.751691073 | 1.99656E-06 |
| lqgap3 404710        | -1.654137984 | 0.293749357 | -6.580133333 | 0.095073527 |
| Tnfrsf9 21942        | -1.654137984 | 0.293749357 | -6.580133333 | 0.095073527 |
| Gstm3 14864          | -1.654318694 | 0.053617597 | -1.345747007 | 0.079587522 |
| 0610040B10Rik 67672  | -1.65584106  | 0.149616652 | -1.258466693 | 0.307267274 |
| lrgm2 54396          | -1.656170054 | 0.017200273 | -1.476060579 | 0.02912842  |
| Ccdc3 74186          | -1.656814853 | 0.062110265 | -1.501332878 | 0.108758185 |
| Snpc3 77634          | -1.657461981 | 0.242022018 | 1.107576357  | 0.432071815 |
| Zfp710 209225        | -1.657658748 | 4.62669E-05 | -1.522489837 | 4.69083E-05 |
| Aldoc 11676          | -1.657741482 | 0.113098969 | -1.243650871 | 0.239010043 |
| Atat1 73242          | -1.658139728 | 0.000863425 | -1.552860655 | 0.00088946  |
| Runx3 12399          | -1.658583124 | 0.191866325 | -3.726504649 | 0.020988845 |
| Gm13698 668096       | -1.658638303 | 0.124054589 | -2.367267604 | 0.04191262  |
| Isoc1 66307          | -1.659234514 | 0.08305695  | -1.519054972 | 0.065906178 |
| Tfcp2l1 81879        | -1.65941296  | 0.087169911 | -1.428793812 | 0.148573421 |
| Rac2 19354           | -1.659424395 | 0.002085866 | -1.630289375 | 0.005126785 |
| E330016A19Rik 214763 | -1.659842094 | 0.226658992 | -1.659842094 | 0.226658992 |
| Trip13 69716         | -1.660179572 | 0.292881026 | -3.925       | 0.173296754 |
| Mybl2 17865          | -1.660399188 | 0.184765033 | -2.539471071 | 0.085388228 |
| Cux1 13047           | -1.660474775 | 0.003996866 | -1.625634095 | 0.000424867 |
| Sepn1 74777          | -1.660723208 | 0.060735946 | -1.660723208 | 0.060735946 |
| Rbm33 381626         | -1.660784016 | 0.092332312 | -1.254741909 | 0.165323539 |
| Tecpr1 70381         | -1.661784763 | 0.012481974 | -1.479662947 | 0.016710515 |
| Arhgef6 73341        | -1.661972752 | 0.099661378 | -2.483511189 | 0.015212152 |
| Zfhx2 239102         | -1.662099075 | 0.036654131 | -1.279387248 | 0.08867245  |
| C78339 97863         | -1.662211032 | 0.26013642  | -1.134450896 | 0.422062756 |
| 1700025K23Rik 66337  | -1.663534103 | 0.321565824 | -2.76078     | 0.173296754 |
| BC024386 212965      | -1.663698165 | 0.006434047 | -1.558879349 | 0.014853862 |
| Gpr160 71862         | -1.663976591 | 0.195257619 | -2.864906452 | 0.071212126 |
| Plekha6 240753       | -1.664117677 | 0.007608015 | -1.664117677 | 0.007608015 |
| Pfkfb3 170768        | -1.66438917  | 0.169440089 | -1.403455999 | 0.08952357  |
| C1galt1 94192        | -1.665388026 | 0.175061037 | -2.116168968 | 0.050684142 |
| Gemin8 237221        | -1.666032837 | 0.087405362 | -1.989941165 | 0.010527848 |
| Bend4 666938         | -1.666318835 | 0.22124899  | 1.176242295  | 0.384301458 |
| Nkx2-1 21869         | -1.666337759 | 0.272375901 | -8.162333333 | 0.046595088 |
| Nr1d2 353187         | -1.666344298 | 0.094260316 | -1.235941003 | 0.150107928 |
| Glg1 20340           | -1.666540613 | 0.022977094 | -1.514353905 | 0.047791085 |
| Tceal6 66104         | -1.666666667 | 0.170446566 | 1            | #DIV/0!     |
| Igf2 16002           | -1.667120053 | 0.115879404 | -1.667120053 | 0.115879404 |
| Frs2 327826          | -1.667496281 | 0.165698577 | -1.151543146 | 0.370371736 |



|                     |              |             |              |             |
|---------------------|--------------|-------------|--------------|-------------|
| Zfp395 380912       | -1.668176212 | 0.005181306 | -1.834240315 | 0.002987509 |
| Gabrq 57249         | -1.668642822 | 0.291292711 | -3.925       | 0.173296754 |
| Mef2a 17258         | -1.668728027 | 0.276959175 | 1.705693277  | 0.014134966 |
| Nudt13 67725        | -1.670256782 | 0.004052161 | -1.562089295 | 0.008120882 |
| Mnda 381308         | -1.670333466 | 0.122496434 | -1.357129652 | 0.242305176 |
| Dnajc9 108671       | -1.67060973  | 0.019854035 | -1.326979511 | 0.055362401 |
| Chd3 216848         | -1.67281074  | 0.005453755 | -1.530681801 | 0.008021484 |
| Jam3 83964          | -1.672995736 | 0.20416446  | -2.077146768 | 0.161022001 |
| Gprc5b 64297        | -1.673107757 | 0.190023623 | -2.275047768 | 0.097089671 |
| Cyp4f17 208285      | -1.673684276 | 0.028063236 | -1.673684276 | 0.028063236 |
| Tmem199 195040      | -1.673929489 | 0.03682826  | -1.450802673 | 0.070740456 |
| Akr1c14 105387      | -1.674078226 | 0.069213461 | -1.454558066 | 0.069278023 |
| RbmX2 209003        | -1.6741979   | 0.15324935  | -1.020617533 | 0.479596899 |
| Zfp518b 100515      | -1.674251429 | 0.166598536 | -3.460873102 | 0.010490817 |
| Rarb 218772         | -1.674491474 | 0.14083798  | -1.218209669 | 0.307236577 |
| Mlxip1 58805        | -1.676091496 | 0.014280816 | -1.578401984 | 0.029512733 |
| Ildr2 100039795     | -1.676187126 | 0.010646664 | -1.676187126 | 0.010646664 |
| Gbp8 76074          | -1.676343733 | 0.063347622 | -2.172696156 | 0.018725395 |
| Trem1 71326         | -1.676478453 | 0.283006472 | -2.76078     | 0.173296754 |
| Serpinb1c 380839    | -1.676478453 | 0.283006472 | -2.76078     | 0.173296754 |
| Ripk3 56532         | -1.676569969 | 0.140365872 | -1.264225056 | 0.294498843 |
| Cxcl14 57266        | -1.676778915 | 0.120502822 | -1.395523875 | 0.230427877 |
| 1810064F22Rik 69862 | -1.677061188 | 0.228367159 | -1.677061188 | 0.228367159 |
| Spats2 72572        | -1.677587726 | 0.018600661 | -1.817389655 | 0.007271777 |
| Mir546 723882       | -1.67789458  | 0.263734308 | -2.3037      | 0.15892251  |
| Slc22a23 73102      | -1.678293376 | 0.016534187 | -1.341705074 | 0.035285634 |
| Thbs2 21826         | -1.678757227 | 0.141521236 | -1.678757227 | 0.141521236 |
| Gla 11605           | -1.678874319 | 0.022519256 | -1.620296005 | 0.004328827 |
| Rasal3 320484       | -1.679136581 | 0.077080623 | -1.451564148 | 0.153488784 |
| Zfp160 224585       | -1.679227806 | 0.197937755 | -1.171968448 | 0.396178324 |
| Mfsd6l 215723       | -1.679565441 | 0.341175328 | 1            | #DIV/0!     |
| Pgc 109820          | -1.679565441 | 0.341175328 | 1            | #DIV/0!     |
| Cyp4f14 64385       | -1.679746683 | 0.000239333 | -1.78791945  | 4.10795E-06 |
| Mars2 212679        | -1.680412889 | 0.207595328 | -1.074948834 | 0.449911652 |
| Mdc1 240087         | -1.680575348 | 0.076706127 | -1.391301218 | 0.157248663 |
| Traf1 22029         | -1.680821735 | 0.161901704 | -2.225794019 | 0.077446582 |
| Slc41a2 338365      | -1.68084442  | 0.227724913 | 1.389051461  | 0.144313583 |
| Ppp1r3e 105651      | -1.680848028 | 0.007673158 | -2.111402436 | 0.000254409 |
| Emb 13723           | -1.681267527 | 0.255241667 | -6.404816667 | 0.044430303 |
| Lst1 16988          | -1.681351162 | 0.21228564  | -2.577069326 | 0.079542024 |
| Mical1 171580       | -1.681464202 | 0.02414458  | -1.681464202 | 0.02414458  |
| Lyst 17101          | -1.682081398 | 0.119125472 | -1.256995996 | 0.255155356 |
| Mir1949 100316700   | -1.682297636 | 0.077400348 | -2.620684414 | 0.00457064  |
| Ano1 101772         | -1.682674715 | 0.081546374 | -1.95494224  | 0.022586413 |
| Fabp1 14080         | -1.682754208 | 0.046971055 | -1.427868151 | 0.09035385  |
| Ppwd1 238831        | -1.68294513  | 0.07010921  | -2.099976177 | 0.031831111 |
| Hsd3b2 15493        | -1.684659721 | 0.013125423 | -1.684659721 | 0.013125423 |
| Dopey1 320615       | -1.685093922 | 0.061690651 | -1.990949993 | 0.037553166 |
| Ascl3 56787         | -1.685686286 | 0.25407837  | -6.42165     | 0.04426109  |
| Fam55c 385658       | -1.686247212 | 0.246141559 | -1.72578057  | 0.278974436 |
| 5730559C18Rik 67313 | -1.686965869 | 0.280519474 | -2.8         | 0.173296754 |
| Mdfic 16543         | -1.687604588 | 0.065749031 | -1.37741626  | 0.127736568 |
| Lrg1 76905          | -1.687952922 | 0.019577966 | -1.883261072 | 0.002364582 |

|                      |              |             |              |             |
|----------------------|--------------|-------------|--------------|-------------|
| 6230427J02Rik 68176  | -1.688144453 | 0.183045694 | -4.430131319 | 0.00377609  |
| Ddit4l 73284         | -1.689392652 | 0.083437475 | -1.346787572 | 0.16945781  |
| Pmp22 18858          | -1.690271227 | 0.0597296   | -1.952665874 | 0.002985716 |
| Fastkd3 69577        | -1.691882624 | 0.064012732 | -1.691882624 | 0.064012732 |
| Ankrd24 70615        | -1.691942632 | 0.005034794 | -1.691942632 | 0.005034794 |
| Slc22a13b 109280     | -1.692117548 | 0.253065206 | -6.44615     | 0.04497135  |
| Nrp2 18187           | -1.692260986 | 0.023916083 | -2.164632246 | 0.002071187 |
| 4930513N10Rik 319960 | -1.692367343 | 0.279253887 | -2.8202      | 0.173296754 |
| 4930432K21Rik 74666  | -1.692367343 | 0.279253887 | -2.8202      | 0.173296754 |
| 1700067K01Rik 73453  | -1.692815864 | 0.111088303 | -1.692815864 | 0.111088303 |
| Nxn1l 234404         | -1.692857143 | 0.272492918 | -2.8         | 0.173296754 |
| Adamts3 330119       | -1.692857143 | 0.272492918 | -2.8         | 0.173296754 |
| Spns3 77577          | -1.692949721 | 0.290590697 | -4.6202      | 0.07056113  |
| Gmip 78816           | -1.6929673   | 0.001103473 | -1.6929673   | 0.001103473 |
| 1110028C15Rik 68691  | -1.693097091 | 0.111425824 | -1.080303666 | 0.396566232 |
| Arhgef37 328967      | -1.694022649 | 0.12387789  | -1.285177103 | 0.262743865 |
| Gm10638 666945       | -1.694116199 | 0.289329356 | -1.217265772 | 0.429152681 |
| Pcbp3 59093          | -1.694420337 | 0.11601919  | -2.776875309 | 0.01515967  |
| Snord123 66835       | -1.694462629 | 0.197688348 | -2.016429422 | 0.128863339 |
| Cxcl9 17329          | -1.694643742 | 0.004650859 | -1.835921561 | 0.000629346 |
| Chdh 218865          | -1.695050447 | 0.021736002 | -1.50442317  | 0.040781958 |
| Zc3hav1 78781        | -1.695146128 | 0.049980578 | -1.866196689 | 0.013022672 |
| Asns 27053           | -1.695201945 | 0.279868539 | -1.717057615 | 0.248962855 |
| Plek2 27260          | -1.695282989 | 0.209838265 | -3.665132774 | 0.054624765 |
| Efnb3 13643          | -1.696536306 | 0.251912966 | -6.462983333 | 0.044795474 |
| Rps6ka1 20111        | -1.696635705 | 0.056232287 | -1.214537324 | 0.067544819 |
| Ephb6 13848          | -1.697853054 | 0.172488405 | -2.268304799 | 0.094675925 |
| 4933411K16Rik 66765  | -1.697986844 | 0.205449342 | -2.733259285 | 0.071305896 |
| Sufu 24069           | -1.698496332 | 0.09656172  | -2.266232002 | 0.039486462 |
| Smarcd3 66993        | -1.698605798 | 0.260803399 | 1.32887796   | 0.318962999 |
| Cd200r1 57781        | -1.698628571 | 0.271179325 | -2.8202      | 0.173296754 |
| Pou6f1 19009         | -1.699245358 | 0.043839176 | -1.685150973 | 0.027570063 |
| Cpne3 70568          | -1.699575718 | 0.095252243 | -1.61376596  | 0.054642774 |
| Lime1 72699          | -1.699614116 | 0.003660654 | -1.699614116 | 0.003660654 |
| Fan1 330554          | -1.700035036 | 0.111082196 | -1.078668386 | 0.396820522 |
| Nmt2 18108           | -1.700169116 | 0.12521227  | -1.281006811 | 0.266430708 |
| Il12rb1 16161        | -1.700304149 | 0.142051309 | -3.044906276 | 0.020499896 |
| Slc13a3 114644       | -1.701917046 | 0.023000941 | -1.829393675 | 0.012743083 |
| AB124611 382062      | -1.702129165 | 0.02732242  | -1.702129165 | 0.02732242  |
| Pyroxd1 232491       | -1.702593675 | 0.000477183 | -1.499016507 | 0.001168728 |
| 1810011O10Rik 69068  | -1.703130867 | 0.021206549 | -1.444358714 | 0.015145517 |
| Plxdc1 72324         | -1.703163912 | 0.160542737 | -1.703163912 | 0.160542737 |
| Vps13c 320528        | -1.703653108 | 0.058979495 | -1.576850163 | 0.058527471 |
| Ptk7 71461           | -1.704050886 | 0.218710349 | 1.026920947  | 0.480583447 |
| Gstt3 103140         | -1.704784252 | 0.002469838 | -1.985792974 | 0.000162619 |
| Pcdh7 54216          | -1.705115697 | 0.249673789 | -6.495666667 | 0.044433779 |
| Acsm1 117147         | -1.705233872 | 0.000197845 | -1.628679295 | 0.000567933 |
| Pgbd1 319207         | -1.705639273 | 0.243342833 | -2.629015854 | 0.067030285 |
| Arhgap30 226652      | -1.705676215 | 0.048024585 | -1.705676215 | 0.048024585 |
| Zfp791 244556        | -1.705759401 | 0.263909036 | -7.88976     | 0.029636667 |
| Rpusd4 71989         | -1.70587985  | 0.008618859 | -1.818323758 | 0.004229495 |
| 9930012K11Rik 268759 | -1.706003278 | 0.242290604 | -9.21165     | 0.014618853 |
| Ahrr 11624           | -1.707028571 | 0.27016815  | -2.8         | 0.173296754 |

|                      |              |             |              |             |
|----------------------|--------------|-------------|--------------|-------------|
| Hhipl1 214305        | -1.707028571 | 0.27016815  | -2.8         | 0.173296754 |
| TtlI8 239591         | -1.707028571 | 0.27016815  | -2.8         | 0.173296754 |
| A930004D18Rik 77940  | -1.708568057 | 0.187984678 | -3.341597838 | 0.049363341 |
| Xpo4 57258           | -1.708593    | 0.29809535  | -4.72156     | 0.173296754 |
| Fhod3 225288         | -1.70910297  | 0.125287711 | -1.70910297  | 0.125287711 |
| Gm3893 100042539     | -1.709403299 | 0.070261985 | -2.930095829 | 0.000351319 |
| Coro2a 107684        | -1.70968552  | 0.068464315 | -1.406436809 | 0.138169071 |
| Ptger1 19216         | -1.71099352  | 0.060937737 | -1.71099352  | 0.060937737 |
| Rnf152 320311        | -1.711450733 | 0.174924896 | -1.470144008 | 0.160892583 |
| Ube2cbp 70348        | -1.711508961 | 0.024522112 | -1.711508961 | 0.024522112 |
| 4931440F15Rik 216622 | -1.711548172 | 0.21681309  | -2.563656748 | 0.109738328 |
| Zfp781 331188        | -1.711573102 | 0.128498695 | -3.086198958 | 0.006804607 |
| Phtf2 68770          | -1.712072458 | 0.065887033 | -1.163442675 | 0.241233708 |
| Nefh 380684          | -1.712216699 | 0.194861962 | -1.712216699 | 0.194861962 |
| Spata5 57815         | -1.712377294 | 0.175723037 | -1.260883033 | 0.344849915 |
| Gpc2 71951           | -1.7128      | 0.26887049  | -2.8202      | 0.173296754 |
| Plcd3 72469          | -1.713476514 | 0.146032874 | -2.042980886 | 0.060331101 |
| Zfp958 233987        | -1.713560716 | 0.224903489 | -1.651933176 | 0.232208156 |
| Apol7a 75761         | -1.714076446 | 0.001150119 | -1.714076446 | 0.001150119 |
| Myo19 66196          | -1.714240271 | 0.047988717 | -1.714240271 | 0.047988717 |
| Olfm3 229759         | -1.714924863 | 0.240084264 | -1.84810098  | 0.2616155   |
| Mpp2 50997           | -1.715117898 | 0.233787796 | -1.55095307  | 0.306183755 |
| Ltb4r2 57260         | -1.715506599 | 0.203984634 | -1.141511102 | 0.417541925 |
| Pklr 18770           | -1.715592909 | 0.008919402 | -1.578604988 | 0.017990658 |
| Mpdz 17475           | -1.71574472  | 0.176104317 | -1.546700174 | 0.209610546 |
| Cpeb4 67579          | -1.717450638 | 0.24031264  | -1.178880102 | 0.375964502 |
| Igfals 16005         | -1.717539968 | 2.86355E-05 | -1.597617626 | 1.86187E-05 |
| Fyco1 17281          | -1.717549508 | 0.11996895  | -1.570091976 | 0.072471932 |
| Naf1 234344          | -1.71887885  | 0.105540091 | -1.970778971 | 0.048892658 |
| 6430571L13Rik 235599 | -1.719195138 | 0.170797878 | -1.292059827 | 0.329771645 |
| Spats2l 67198        | -1.719447509 | 0.200632522 | -1.055876767 | 0.459473236 |
| Adrb1 11554          | -1.720456332 | 0.166799925 | -3.140974485 | 0.016189949 |
| Tdrd3 219249         | -1.720750851 | 0.002889897 | -1.720750851 | 0.002889897 |
| Cenpj 219103         | -1.720792842 | 0.191316928 | -2.719100932 | 0.096306777 |
| Fam129a 63913        | -1.720952106 | 0.102197434 | -1.741820709 | 0.052847403 |
| Gsta2 14858          | -1.721852257 | 0.085710357 | -3.380983938 | 2.34565E-05 |
| Tubgcp5 233276       | -1.721923746 | 0.213207188 | -3.330312925 | 0.083399312 |
| Gpx8 69590           | -1.722807466 | 0.227181455 | -13.82858    | 1.93905E-05 |
| Tra2a 101214         | -1.723079154 | 0.069796084 | -1.593050577 | 0.02841413  |
| Akr1c6 83702         | -1.725384144 | 0.019344402 | -1.640416079 | 0.015250931 |
| Arhgap27 544817      | -1.725718003 | 0.057157444 | -1.725718003 | 0.057157444 |
| Lamc3 23928          | -1.72830013  | 0.061444652 | -1.72830013  | 0.061444652 |
| Fam65b 193385        | -1.729431459 | 0.099099412 | -2.227265096 | 0.052971872 |
| Akr1d1 208665        | -1.73161085  | 0.014671283 | -1.618159117 | 0.019072998 |
| Sema6d 214968        | -1.733391587 | 0.166293529 | -1.374910106 | 0.235804615 |
| Zc3h12c 244871       | -1.734399745 | 0.276647844 | 1.535969564  | 0.275519807 |
| C130050O18Rik 319772 | -1.734908569 | 0.237949802 | 1.14606924   | 0.409744528 |
| Abca3 27410          | -1.736156601 | 0.015882812 | -1.597559917 | 0.006295349 |
| BC024139 271278      | -1.736650368 | 0.012889473 | -1.952377473 | 0.008001652 |
| Actn1 109711         | -1.737365978 | 0.026105076 | -1.737365978 | 0.026105076 |
| Eid2b 434156         | -1.737659131 | 0.017569964 | -1.737659131 | 0.017569964 |
| Ptpn18 19253         | -1.73788693  | 0.070582804 | -1.48759903  | 0.142564231 |
| Clec4a3 73149        | -1.737913762 | 0.103467985 | -1.383073788 | 0.213234617 |

|                      |              |             |              |             |
|----------------------|--------------|-------------|--------------|-------------|
| Ankrd26 232339       | -1.738221829 | 0.180942259 | -1.460013226 | 0.262406953 |
| 4930430F08Rik 68281  | -1.73831551  | 0.125734449 | -2.561840353 | 0.047631559 |
| Kdelc2 68304         | -1.739455499 | 0.05318945  | -1.463680732 | 0.106158092 |
| Pik3ap1 83490        | -1.740004305 | 0.117257412 | -1.915513539 | 0.066605295 |
| Rem1 19700           | -1.74013784  | 0.119056117 | -1.74013784  | 0.119056117 |
| Cdan1 68968          | -1.740420645 | 0.072170496 | -2.098512426 | 0.045428982 |
| Maoa 17161           | -1.741498805 | 0.018612496 | -1.741498805 | 0.018612496 |
| Podxl2 319655        | -1.741903928 | 0.287669356 | -1.430775758 | 0.37678302  |
| Pdpr 319518          | -1.742638592 | 0.211164201 | 1.029063296  | 0.47748618  |
| Tas1r3 83771         | -1.743084174 | 0.208884425 | -1.062358995 | 0.460737989 |
| Tmie 20776           | -1.743084275 | 0.009907419 | -2.063328581 | 0.00241533  |
| Nynrin 277154        | -1.744630546 | 0.081742396 | -1.333987584 | 0.151531093 |
| BC030307 103220      | -1.745492613 | 0.081398678 | -1.745492613 | 0.081398678 |
| Spty2d1 101685       | -1.746792095 | 0.085761918 | -1.373556401 | 0.175244778 |
| Paxip1 55982         | -1.747077727 | 0.077245671 | -1.196698234 | 0.271502791 |
| Lin7a 108030         | -1.748256861 | 0.023884706 | -1.897539297 | 0.022728792 |
| Cd22 12483           | -1.750359337 | 0.110888724 | -1.328099769 | 0.233937128 |
| 2810007J24Rik 76971  | -1.7506163   | 0.009647348 | -1.538737522 | 0.0084537   |
| Krit1 79264          | -1.750765464 | 0.10834922  | -1.481397862 | 0.099546361 |
| Cd37 12493           | -1.751773868 | 0.010698193 | -1.601962947 | 0.021662221 |
| Stat1 20846          | -1.751837868 | 0.004728563 | -1.58024103  | 0.004802197 |
| Tle6 114606          | -1.752781066 | 0.08898503  | -1.844341215 | 0.06879483  |
| Kif12 16552          | -1.753806915 | 0.129965018 | -3.316960282 | 0.007449951 |
| Icam2 15896          | -1.753914407 | 0.089309677 | -1.368807924 | 0.183459367 |
| Neurl1b 240055       | -1.754128148 | 0.116593752 | -2.108495289 | 0.088695485 |
| Inha 16322           | -1.755482859 | 0.230794647 | -1.020204885 | 0.489224964 |
| 1200009I06Rik 74190  | -1.755850976 | 0.046479727 | -1.755850976 | 0.046479727 |
| Fem1c 240263         | -1.756903701 | 0.15676915  | -1.174457979 | 0.355178258 |
| Sipi 20568           | -1.756913572 | 0.12958707  | -1.540915589 | 0.097109963 |
| Synpo2i 68760        | -1.75696     | 0.25338571  | -8.7848      | 0.047326766 |
| Wwc1 211652          | -1.757462367 | 0.010480433 | -1.4084321   | 0.019302918 |
| Igfbp6 16012         | -1.757623209 | 0.153122711 | -2.631471977 | 0.072947586 |
| AI597479 98404       | -1.75874351  | 0.109470477 | -1.294501515 | 0.229967673 |
| Tert 21752           | -1.759544783 | 0.198105819 | -1.759544783 | 0.198105819 |
| O3far1 107221        | -1.759752067 | 0.217844801 | -5.48415     | 0.036928558 |
| Cdc14b 218294        | -1.759767407 | 0.04812941  | -1.357167708 | 0.004135054 |
| Caprin2 232560       | -1.759940278 | 0.180724806 | -1.913728518 | 0.154463118 |
| Sema6a 20358         | -1.760038628 | 0.000606933 | -1.666743529 | 0.001102135 |
| Fasn 14104           | -1.760545318 | 0.008780127 | -1.760545318 | 0.008780127 |
| Ptpn7 320139         | -1.760641429 | 0.179520222 | -3.23060157  | 0.061792298 |
| Gbp3 55932           | -1.761071755 | 0.128105436 | -1.162212251 | 0.242912755 |
| Saa1 20208           | -1.762355647 | 0.163308525 | -3.751538053 | 0.02465028  |
| Anxa9 71790          | -1.762734838 | 0.16409575  | -2.013977045 | 0.135283857 |
| Tmem26 327766        | -1.76464803  | 0.264256115 | 1.168103268  | 0.432025983 |
| Lect1 16840          | -1.766751454 | 0.199776926 | -5.631641297 | 0.018448563 |
| Wdpcp 216560         | -1.768353086 | 0.135212242 | -3.882710768 | 0.002318131 |
| Il1f9 215257         | -1.768684641 | 0.257898942 | 1.0485625    | 0.479655978 |
| Aldh18a1 56454       | -1.769106202 | 0.249677554 | -10.16853004 | 0.038438126 |
| Ids 15931            | -1.771038492 | 0.076465443 | -1.375264616 | 0.145808866 |
| Ngfr 18053           | -1.771597234 | 0.012859792 | -1.771597234 | 0.012859792 |
| BC005764 216152      | -1.771763755 | 0.160702222 | -3.167452019 | 0.049026479 |
| Nlgn3 245537         | -1.772169845 | 0.168803574 | -1.772169845 | 0.168803574 |
| D630039A03Rik 242484 | -1.773553634 | 0.010154678 | -1.42617495  | 0.005074572 |

|                       |              |             |              |             |
|-----------------------|--------------|-------------|--------------|-------------|
| Slc36a1 215335        | -1.773746392 | 0.024912345 | -1.376016168 | 0.069855468 |
| Gm6981 629557         | -1.774758159 | 0.122480107 | -1.361343299 | 0.252904244 |
| 1700039E15Rik 76713   | -1.77537585  | 0.150907079 | -1.295196733 | 0.311944506 |
| Susd4 96935           | -1.776694004 | 0.219467046 | 1.131568473  | 0.388974061 |
| Gale 74246            | -1.777808618 | 0.025508107 | -1.47994979  | 0.022045905 |
| BC025920 268319       | -1.778266832 | 0.189449736 | -2.486249929 | 0.059958096 |
| BC018242 235044       | -1.77909193  | 0.007135426 | -2.070642267 | 0.002302264 |
| Kcnn4 16534           | -1.779094089 | 0.145510499 | -1.503228565 | 0.175719424 |
| Car5a 12352           | -1.78005237  | 8.38919E-05 | -1.883161299 | 8.18144E-05 |
| Gpat2 215456          | -1.780208399 | 0.035978243 | -1.491932034 | 0.07439302  |
| Cdh13 12554           | -1.780405662 | 0.189896141 | -4.627291613 | 0.029720189 |
| Nr4a2 18227           | -1.780617361 | 0.217915002 | -3.677262626 | 0.091207367 |
| Gpr155 68526          | -1.780692891 | 0.025921744 | -1.591864552 | 0.053575028 |
| Ncs1 14299            | -1.783027624 | 0.21016136  | -1.783027624 | 0.21016136  |
| 1810046K07Rik 69809   | -1.784068219 | 0.02328419  | -1.782590024 | 0.00577815  |
| Casz1 69743           | -1.784425604 | 0.069760203 | -1.517147695 | 0.141175205 |
| Fdx1 68165            | -1.785307802 | 0.118258462 | -2.455395438 | 0.054147816 |
| Apba1 319924          | -1.785416269 | 0.155405531 | -2.260298314 | 0.099496502 |
| Sult2a5 434264        | -1.785729767 | 0.188653721 | -2.491834775 | 0.079896404 |
| Fam26f 215900         | -1.786120975 | 0.231195524 | -2.985012121 | 0.094640659 |
| Adamdec1 58860        | -1.786837004 | 0.071442825 | -2.130585869 | 0.009190051 |
| Eps8l1 67425          | -1.786957419 | 0.111068199 | -1.314946465 | 0.234929331 |
| Sec61g 20335          | -1.787097513 | 0.060066958 | -1.518219694 | 0.122695623 |
| Ttll4 67534           | -1.787116331 | 0.06302931  | -1.787116331 | 0.06302931  |
| Lrtm1 319476          | -1.787256287 | 0.002466475 | -1.736227276 | 0.006138725 |
| Samhd1 56045          | -1.788638075 | 0.005584573 | -1.59366214  | 0.004636347 |
| Olfml3 99543          | -1.789770248 | 0.011060672 | -1.969231529 | 0.002086595 |
| Neb 17996             | -1.791051041 | 0.179076836 | -1.895694497 | 0.181653608 |
| BC052040 399568       | -1.791539876 | 0.037637195 | -2.199141021 | 0.016866593 |
| Kif1a 16560           | -1.791715806 | 0.123191515 | -2.201129506 | 0.07889046  |
| lqcj-schip1 100505386 | -1.791866768 | 0.265913293 | -1.61274826  | 0.354514631 |
| 1700019G17Rik 75541   | -1.792424533 | 0.065153774 | -1.792424533 | 0.065153774 |
| Srek1ip1 67288        | -1.792678304 | 0.024661008 | -2.621149395 | 7.48605E-05 |
| Rpap2 231571          | -1.792689775 | 0.021087817 | -1.353638436 | 0.047311291 |
| Pds5b 100710          | -1.792939085 | 0.033278237 | -1.505368463 | 0.054081083 |
| Tlr3 142980           | -1.795142222 | 0.125956585 | -4.358395581 | 0.000478307 |
| Amigo3 320844         | -1.795280245 | 0.039511556 | -1.666626295 | 0.076251112 |
| Homez 239099          | -1.795943498 | 0.00813635  | -2.349595572 | 0.000127976 |
| Pdpn 14726            | -1.797598448 | 0.239870069 | -4.58098     | 0.070596339 |
| Mpped2 77015          | -1.797598448 | 0.239870069 | -4.58098     | 0.070596339 |
| Dab2 13132            | -1.798285619 | 0.050986808 | -1.446041379 | 0.084135171 |
| Satb2 212712          | -1.798461317 | 0.268243122 | -1.430775758 | 0.37678302  |
| Cluap1 76779          | -1.798476472 | 0.008679465 | -2.149192874 | 0.002069805 |
| Orm2 18406            | -1.799939365 | 0.02697974  | -1.529839391 | 0.042455821 |
| Dennd3 105841         | -1.800680309 | 0.11948791  | -1.298550064 | 0.256140286 |
| Meis1 17268           | -1.801396015 | 0.06159594  | -1.509651788 | 0.125738964 |
| Hook1 77963           | -1.801914474 | 0.155123802 | -1.681630954 | 0.190077218 |
| Arhgap33 233071       | -1.802331418 | 0.055979293 | -1.515929971 | 0.109433913 |
| Snora30 100217442     | -1.802357914 | 0.179856773 | -4.061967816 | 0.040170907 |
| Wnt7b 22422           | -1.802508571 | 0.256175854 | -2.8         | 0.173296754 |
| 2900006K08Rik 72873   | -1.80356067  | 0.191140862 | -3.871375758 | 0.023866915 |
| 4933407H18Rik 71101   | -1.80490409  | 0.027963012 | -2.176636362 | 0.012859592 |
| Wnt9b 22412           | -1.806371492 | 0.098907422 | -3.251136338 | 0.002767779 |

|                      |              |             |              |             |
|----------------------|--------------|-------------|--------------|-------------|
| Orm1 18405           | -1.806923654 | 0.021314191 | -2.268375539 | 0.001743138 |
| Itpkb 320404         | -1.80749729  | 0.175347838 | -1.80749729  | 0.175347838 |
| Hivep3 16656         | -1.808809969 | 0.109718861 | -1.407429699 | 0.226110948 |
| Slc10a5 241877       | -1.809324447 | 0.205358072 | -1.408484491 | 0.285847742 |
| Asap1 13196          | -1.809705872 | 0.029392236 | -1.518447808 | 0.043189585 |
| Alox12 11684         | -1.809892288 | 0.171933905 | -1.225154778 | 0.364078421 |
| Dcp1a 75901          | -1.811188585 | 0.049663242 | -2.268107142 | 0.023559599 |
| Nos1ap 70729         | -1.812406165 | 0.295357991 | 1.170129778  | 0.437059136 |
| 1700028K03Rik 76421  | -1.813086369 | 0.057166167 | -1.54860358  | 0.116754605 |
| Adcy7 11513          | -1.813769934 | 0.205267889 | 1.053670469  | 0.453967044 |
| Orai2 269717         | -1.814148272 | 0.151280701 | -1.814148272 | 0.151280701 |
| Ldlr 16835           | -1.814929015 | 0.023967452 | -1.590802185 | 0.018414308 |
| Tmc8 217356          | -1.815162932 | 0.004264936 | -2.130676874 | 0.000951787 |
| Sntb1 20649          | -1.815984541 | 0.166844726 | -2.514374605 | 0.110918024 |
| 4930441014Rik 68271  | -1.816891905 | 0.188349461 | -2.555049552 | 0.120507484 |
| Atp8a1 11980         | -1.818224585 | 0.06120423  | -2.171913251 | 0.005451997 |
| Wdr90 106618         | -1.819054919 | 0.02253112  | -1.3370474   | 0.072253745 |
| Zfhx4 80892          | -1.819553779 | 0.12651166  | -1.226824527 | 0.271376896 |
| Lair1 52855          | -1.820558028 | 0.129732432 | -2.683045165 | 0.061346791 |
| Zfp532 328977        | -1.821098179 | 0.153399516 | -1.275302041 | 0.325536689 |
| Gbp2 14469           | -1.821316942 | 0.011634642 | -1.522840748 | 0.020141173 |
| Angpt1 11600         | -1.821551101 | 0.186933396 | -2.566129524 | 0.119075489 |
| Thbs1 21825          | -1.822039251 | 0.073514296 | -2.050854951 | 0.036971362 |
| Slc14a1 108052       | -1.823719423 | 0.260442814 | -2.8202      | 0.173296754 |
| Cys1 12879           | -1.824853931 | 0.045752102 | -2.133493644 | 0.015962787 |
| Ank2 109676          | -1.825816307 | 0.170756375 | -1.825816307 | 0.170756375 |
| 4930528F23Rik 75178  | -1.827216516 | 0.246949986 | -3.034138293 | 0.085514775 |
| Tnk1 83813           | -1.827230926 | 0.221091992 | -6.960866667 | 0.041230736 |
| Lyl1 17095           | -1.827679911 | 0.074649995 | -2.200769692 | 0.052947244 |
| 4922501C03Rik 382090 | -1.828541321 | 0.099245706 | -1.412532591 | 0.206417113 |
| Chtf18 214901        | -1.829120897 | 0.260231664 | -2.8         | 0.173296754 |
| Gm216 241112         | -1.829120897 | 0.260231664 | -2.8         | 0.173296754 |
| Tpm2 22004           | -1.829374559 | 0.030792843 | -1.517277902 | 0.041820772 |
| Slc25a23 66972       | -1.829839811 | 0.000570653 | -1.815371176 | 0.000176783 |
| Traf3ip2 103213      | -1.831898005 | 0.011109707 | -1.635086226 | 0.007434584 |
| Plekkg2 101497       | -1.832023823 | 0.000173906 | -1.73173963  | 0.000488063 |
| Tnnt1 21955          | -1.832503123 | 0.021627045 | -1.597413893 | 0.004630179 |
| Reep6 70335          | -1.832544371 | 0.000478985 | -1.907466058 | 4.17706E-05 |
| Pltp 18830           | -1.832572352 | 0.056498999 | -1.437721911 | 0.089476575 |
| Atp2b2 11941         | -1.835370832 | 0.00868041  | -1.437978841 | 0.02255789  |
| Ninl 78177           | -1.835676892 | 0.084941169 | -1.835676892 | 0.084941169 |
| Map3k8 26410         | -1.835792849 | 0.210605694 | 1.076475079  | 0.439904845 |
| L3mbtl3 237339       | -1.83611879  | 0.229613791 | -3.574776786 | 0.124634646 |
| Rnf186 66825         | -1.837389231 | 0.145998984 | -2.687832786 | 0.035898787 |
| Rabepk 227746        | -1.83798843  | 0.035654931 | -1.877159616 | 0.015195491 |
| Tcerg1 56070         | -1.839723868 | 0.071416039 | -1.683790078 | 0.055224753 |
| E030010A14Rik 226040 | -1.84005013  | 0.098206264 | -1.371020224 | 0.203095497 |
| Gm11517 629750       | -1.84007918  | 0.134845996 | -1.255988274 | 0.297047748 |
| BC046404 192976      | -1.842110588 | 0.247630967 | -8.6404      | 0.070560672 |
| Sult2a1 20859        | -1.842360379 | 0.073791938 | -2.762415626 | 0.016210463 |
| Sap130 269003        | -1.843564165 | 0.001146382 | -1.694110413 | 0.000930468 |
| Trim12a 76681        | -1.843602834 | 0.008194094 | -1.865645711 | 0.00469604  |
| Foxp2 114142         | -1.843723    | 0.034177607 | -1.946822772 | 0.011633102 |

|                     |              |             |              |             |
|---------------------|--------------|-------------|--------------|-------------|
| Rab25 53868         | -1.844067643 | 0.156287994 | -3.293979798 | 0.05623339  |
| Slc7a11 26570       | -1.845010453 | 0.116821267 | -1.845010453 | 0.116821267 |
| Bcs1l 66821         | -1.846552863 | 0.002300338 | -1.504172687 | 0.00380195  |
| Dnm3os 474332       | -1.847711178 | 0.280957704 | -2.8202      | 0.173296754 |
| Ccdc88b 78317       | -1.848257557 | 0.008034241 | -1.848257557 | 0.008034241 |
| Pik3r3 18710        | -1.850368723 | 0.189900945 | -1.223054295 | 0.386779131 |
| Zfp105 22646        | -1.850596667 | 0.20440672  | -9.252983333 | 0.014711231 |
| Osbpl3 71720        | -1.850887671 | 0.179849574 | -6.989187469 | 0.008832059 |
| Rev1 56210          | -1.851211861 | 0.096543895 | -1.800969012 | 0.073250162 |
| 2810002D19Rik 66457 | -1.851767119 | 0.039272415 | -2.22885046  | 0.023274768 |
| P4htm 74443         | -1.851786003 | 0.180261229 | -2.752539394 | 0.103543379 |
| Acvr1b 11479        | -1.852088098 | 0.113400974 | -1.786948262 | 0.091938875 |
| Fam149a 212326      | -1.853384446 | 0.000377673 | -1.943371822 | 0.000185052 |
| Abca8a 217258       | -1.854142071 | 0.023609401 | -1.395212591 | 0.066316428 |
| Cyrr1 224405        | -1.855620432 | 0.095991455 | -2.799211487 | 0.031793882 |
| Sult1c2 69083       | -1.855679978 | 0.088552872 | -2.154256339 | 0.040798994 |
| Kcnt1 227632        | -1.856128943 | 0.219190212 | -7.38365     | 0.04272972  |
| Myo5c 208943        | -1.856128943 | 0.219190212 | -7.38365     | 0.04272972  |
| Dhx58 80861         | -1.857331327 | 0.005563773 | -2.345040091 | 0.000243221 |
| Hddc3 68695         | -1.858440088 | 0.116577332 | -2.324727716 | 0.042602132 |
| 1700029G01Rik 66938 | -1.858761134 | 0.037369625 | -1.79278341  | 0.009299252 |
| Acs1 74205          | -1.858978354 | 0.076665951 | -1.560918642 | 0.153850793 |
| Ces2c 234671        | -1.85916985  | 0.044224611 | -1.518980191 | 0.029730475 |
| Ms4a6d 68774        | -1.859443999 | 0.135792921 | -1.859443999 | 0.135792921 |
| Mtap1a 17754        | -1.860575911 | 0.254099771 | -13.2522     | 0.061310843 |
| Cyp26a1 13082       | -1.862263184 | 0.112821641 | -2.883828602 | 0.041884096 |
| Fbxl21 213311       | -1.86234949  | 0.049211106 | -1.608438725 | 0.100735226 |
| Esrrg 26381         | -1.862793093 | 0.189523858 | -1.534574665 | 0.29227622  |
| Kcnk10 72258        | -1.862893345 | 0.212484052 | -2.100621395 | 0.237974883 |
| Papd4 100715        | -1.863814276 | 0.005873401 | -1.742006247 | 0.0134775   |
| Ldhd 52815          | -1.863869893 | 4.03251E-05 | -2.047448046 | 6.83593E-06 |
| Rgs10 67865         | -1.864981831 | 0.186000037 | 1.189154721  | 0.297267973 |
| Mmab 77697          | -1.865598773 | 0.018755272 | -1.575206212 | 0.01918897  |
| 1700054N08Rik 73420 | -1.867484357 | 0.243835528 | -3.335808081 | 0.159331054 |
| 3300002I08Rik 69277 | -1.86816     | 0.248985221 | -2.76078     | 0.173296754 |
| Csnk1g1 214897      | -1.868416514 | 0.112967584 | -2.164287385 | 0.074945611 |
| Tlcd2 380712        | -1.868645758 | 0.00138008  | -2.038759478 | 4.35865E-05 |
| Rgs14 51791         | -1.869800872 | 0.061096291 | -2.22696766  | 0.007600498 |
| Fcrl1 229499        | -1.870446611 | 0.199436708 | -9.162133333 | 0.014939816 |
| Fndc1 68655         | -1.870874437 | 0.201091539 | -2.192054545 | 0.202100697 |
| Prl8a1 73244        | -1.871846364 | 0.032037233 | -1.565193139 | 0.066553055 |
| Oasl1 231655        | -1.872893739 | 0.005871036 | -1.58305932  | 0.013157002 |
| Zmiz1 328365        | -1.873599994 | 0.141980762 | -2.207384787 | 0.125806184 |
| Fzd6 14368          | -1.874400784 | 0.056226331 | -1.874400784 | 0.056226331 |
| Kif16b 16558        | -1.875518038 | 0.080121564 | -2.002991804 | 0.035286946 |
| Csgalnact1 234356   | -1.877092895 | 0.222788753 | -4.58098     | 0.070596339 |
| Oas1b 23961         | -1.877888167 | 0.068486625 | -1.574824995 | 0.126515023 |
| Lynx1 23936         | -1.878993253 | 0.08778359  | -2.371926695 | 0.026024097 |
| Gpr17 574402        | -1.879068661 | 0.091150257 | -1.879068661 | 0.091150257 |
| Cpne7 102278        | -1.88028     | 0.188260531 | -5.48415     | 0.036928558 |
| Xkr9 381246         | -1.880307284 | 0.060772617 | -1.694033207 | 0.020792153 |
| Ear12 503845        | -1.880464457 | 0.247325655 | -4.112363095 | 0.139484904 |
| Slc24a5 317750      | -1.882911392 | 0.310017691 | 1            | #DIV/0!     |

|                    |              |             |              |             |
|--------------------|--------------|-------------|--------------|-------------|
| Kif23 71819        | -1.884973952 | 0.181378769 | -2.128806798 | 0.164353183 |
| Lama3 16774        | -1.885394867 | 0.145682001 | -3.271550505 | 0.056060025 |
| Ttbk2 140810       | -1.885532523 | 0.032692283 | -1.640499683 | 0.066560517 |
| Gm4172 100043016   | -1.885966667 | 0.170446566 | 1            | #DIV/0!     |
| Msi1 17690         | -1.887635695 | 0.277658334 | -2.76078     | 0.173296754 |
| Hoxa3 15400        | -1.888180595 | 0.15770525  | -1.888180595 | 0.15770525  |
| Kifap3 16579       | -1.888371978 | 0.085705613 | -1.888371978 | 0.085705613 |
| Rcan2 53901        | -1.890155398 | 0.008906396 | -2.167448248 | 0.00535914  |
| Vtcn1 242122       | -1.891384455 | 0.107444097 | -3.658060998 | 0.013210415 |
| Dhtkd1 209692      | -1.896508565 | 0.14353425  | -1.194109919 | 0.3263038   |
| Zfp558 72230       | -1.900083376 | 0.275082594 | -2.8202      | 0.173296754 |
| Cyp3a41b 100041375 | -1.900319956 | 0.115954972 | -3.171261283 | 0.037124439 |
| Ppapdc3 227721     | -1.903170246 | 0.169685854 | -4.062896753 | 0.05384268  |
| Guca1a 14913       | -1.903576112 | 0.097504658 | -2.154517175 | 0.079555671 |
| Zfp608 269023      | -1.903588454 | 0.131447934 | -1.903588454 | 0.131447934 |
| Nedd9 18003        | -1.903617713 | 0.124222449 | -1.350416437 | 0.26588373  |
| Ttl11 74410        | -1.903757692 | 0.028737933 | -2.080522318 | 0.015430475 |
| Gins1 69270        | -1.905976634 | 0.085455316 | -1.454936561 | 0.174620242 |
| Gstt1 14871        | -1.906011132 | 0.000574614 | -1.906011132 | 0.000574614 |
| Mid1 17318         | -1.906280546 | 0.057063295 | -1.596166245 | 0.046908876 |
| Hmgb1-rs17 628431  | -1.907875443 | 0.086917389 | -2.440175866 | 0.045983368 |
| Mpz 17528          | -1.909574755 | 0.040504288 | -1.916744772 | 0.001456971 |
| Fam102b 329739     | -1.911957411 | 0.080791576 | -3.235045214 | 0.004477426 |
| Pde6g 18588        | -1.912892293 | 0.110916254 | -1.912892293 | 0.110916254 |
| Gm13157 100041677  | -1.913072102 | 0.120263227 | -5.029012121 | 0.000977813 |
| Nlrp6 101613       | -1.91539941  | 0.000185298 | -1.777207537 | 4.79773E-05 |
| Cd248 70445        | -1.916323028 | 0.003776931 | -1.693859469 | 0.001401338 |
| Sox4 20677         | -1.916424218 | 0.27096672  | -2.76078     | 0.173296754 |
| Wfikkn2 278507     | -1.916608717 | 0.141453136 | -1.916608717 | 0.141453136 |
| Cmklr1 14747       | -1.916896654 | 0.000557681 | -1.916896654 | 0.000557681 |
| Itgbl1 223272      | -1.917029266 | 0.228503045 | 1.103561233  | 0.446958035 |
| Tmem185b 226351    | -1.917172453 | 0.008942391 | -1.917172453 | 0.008942391 |
| Cyp2d40 71754      | -1.917694917 | 0.005670131 | -1.691347849 | 0.004873614 |
| Rasl12 70784       | -1.917799396 | 0.210568613 | -1.870260925 | 0.258949734 |
| Ap1s3 252903       | -1.917964997 | 0.109027827 | -1.917964997 | 0.109027827 |
| Rhoh 74734         | -1.918706376 | 0.14869179  | -1.918706376 | 0.14869179  |
| Klrk1 27007        | -1.919594365 | 0.118722426 | -1.919594365 | 0.118722426 |
| Hebp2 56016        | -1.920502198 | 0.188309218 | -3.215169561 | 0.110411701 |
| Ncf4 17972         | -1.921113931 | 0.064819936 | -2.067078482 | 0.042165435 |
| Gm13697 668115     | -1.922392518 | 0.090687625 | -2.00076489  | 0.084959835 |
| Akr1c20 116852     | -1.923680465 | 0.004149908 | -1.85976096  | 0.00261705  |
| Serpina3i 628900   | -1.926135102 | 0.207858507 | -7.662133333 | 0.044268711 |
| Btbd19 78611       | -1.929833488 | 0.056094076 | -1.876640071 | 0.060628458 |
| Gm4951 240327      | -1.929907314 | 0.055503849 | -1.462921261 | 0.067295027 |
| Tcea3 21401        | -1.931334964 | 0.011593213 | -2.365123822 | 0.003863126 |
| Fam115c 232748     | -1.931651429 | 0.242141558 | -2.76078     | 0.173296754 |
| Osbp10 74486       | -1.931651429 | 0.242141558 | -2.76078     | 0.173296754 |
| Slc25a48 328258    | -1.931686875 | 0.090257524 | -1.931686875 | 0.090257524 |
| Tle2 21886         | -1.933190255 | 0.003986198 | -1.865548328 | 0.00332922  |
| Serac1 321007      | -1.93353404  | 0.031831581 | -2.30716527  | 0.020824065 |
| Nlrc5 434341       | -1.935898513 | 0.029407147 | -1.935898513 | 0.029407147 |
| Sult3a1 57430      | -1.936284575 | 0.053899237 | -2.317330161 | 0.010481406 |
| Aox1 11761         | -1.93729537  | 1.95195E-05 | -1.993387625 | 5.42843E-06 |



|                      |              |             |              |             |
|----------------------|--------------|-------------|--------------|-------------|
| Epha7 13841          | -1.9382541   | 0.060326482 | -1.532888167 | 0.116087487 |
| Slc35e4 103710       | -1.939226528 | 0.03505609  | -2.232408978 | 0.006282127 |
| Gm11711 100043125    | -1.939318674 | 0.17829403  | -1.108309306 | 0.425090047 |
| Fads3 60527          | -1.941320592 | 0.051677676 | -1.941320592 | 0.051677676 |
| Aox3 71724           | -1.94209543  | 0.006947521 | -2.14219353  | 0.006391864 |
| Slc22a30 319800      | -1.943353285 | 0.012519889 | -1.735641795 | 0.027397847 |
| Dclk3 245038         | -1.943481033 | 0.011405821 | -2.172171976 | 0.001837479 |
| Hnmt 140483          | -1.94445762  | 0.005270897 | -1.94445762  | 0.005270897 |
| Folr1 14275          | -1.944741682 | 0.204334673 | -7.73615     | 0.043865772 |
| Clca1 12722          | -1.945608757 | 0.085416324 | -1.458398111 | 0.172628657 |
| Rgs19 56470          | -1.949021757 | 0.078836343 | -3.348453291 | 0.001159828 |
| Sec31b 240667        | -1.955405907 | 0.082402455 | -2.215190186 | 0.055779378 |
| Cdca7 66953          | -1.955477398 | 0.085635064 | -1.47586734  | 0.17472525  |
| Ralgps1 241308       | -1.955559217 | 0.050904321 | -1.646698649 | 0.097500653 |
| Tmem107 66910        | -1.9594491   | 0.141660828 | -1.9594491   | 0.141660828 |
| E530011L22Rik 320301 | -1.961283333 | 0.170446566 | 1            | #DIV/0!     |
| Cyp2b13 13089        | -1.961779337 | 0.010622332 | -1.676018567 | 0.007938546 |
| Col20a1 73368        | -1.961828742 | 0.038103933 | -2.251790217 | 0.008809095 |
| Zfp112 57745         | -1.961881667 | 0.177852185 | -3.378637012 | 0.099347744 |
| Tdp2 56196           | -1.962364866 | 0.005180086 | -2.614853779 | 0.000167031 |
| Robo1 19876          | -1.962415389 | 0.109482867 | -1.394052033 | 0.231072164 |
| Qrfp 227717          | -1.962703401 | 0.168876246 | -16.57554    | 1.22771E-05 |
| Peg3 18616           | -1.963518127 | 0.251523633 | -1.189602278 | 0.402044751 |
| Xrcc3 74335          | -1.96492335  | 0.013348971 | -1.96492335  | 0.013348971 |
| Slc4a5 232156        | -1.965173863 | 0.299667008 | 1            | #DIV/0!     |
| Wdr38 76646          | -1.966200228 | 0.073733645 | -1.966200228 | 0.073733645 |
| Inmt 21743           | -1.966721607 | 0.005519719 | -2.738249114 | 1.01641E-05 |
| 1700012D14Rik 75479  | -1.968120319 | 0.196600626 | -1.183107182 | 0.414958471 |
| Hist1h4b 326620      | -1.96878985  | 0.192508438 | -4.117133333 | 0.090539541 |
| Btbd3 228662         | -1.969291979 | 0.083209168 | -2.473441692 | 0.059688336 |
| Pdlim3 53318         | -1.969669457 | 0.301680421 | -2.8         | 0.173296754 |
| Lss 16987            | -1.971111983 | 0.009472095 | -1.673752472 | 0.0039813   |
| Rgma 244058          | -1.971401071 | 0.088005991 | -1.212149433 | 0.291142831 |
| Mmp23 26561          | -1.973429346 | 0.088221507 | -1.973429346 | 0.088221507 |
| Mthfd2 17768         | -1.97509     | 0.182398485 | -9.87545     | 0.017130116 |
| S1pr4 13611          | -1.976528171 | 0.051334967 | -1.660055799 | 0.104884137 |
| Epb4.1l4a 13824      | -1.978898648 | 0.185498662 | -3.003528484 | 0.128782899 |
| Zfp871 208292        | -1.978923341 | 0.108941014 | -1.706340518 | 0.057021707 |
| Gm8989 668128        | -1.979166667 | 0.170446566 | 1            | #DIV/0!     |
| Ttc30a1 78802        | -1.979417202 | 0.131795938 | -1.511053308 | 0.257287526 |
| Spopl 76857          | -1.979678572 | 0.113084143 | -1.421556615 | 0.239062196 |
| Usp53 99526          | -1.985167572 | 0.188632987 | -2.959471574 | 0.148386268 |
| Spib 272382          | -1.985503631 | 0.031925078 | -1.985503631 | 0.031925078 |
| Ngb 64242            | -1.986472724 | 0.212243368 | -2.024513774 | 0.263278926 |
| Spic 20728           | -1.986515767 | 0.143173298 | -2.758874541 | 0.092509394 |
| Lrfn4 225875         | -1.987138839 | 0.130700223 | -1.934315561 | 0.066302254 |
| Pcp4l1 66425         | -1.988561066 | 0.001965512 | -1.988561066 | 0.001965512 |
| Kctd18 51960         | -1.988912379 | 0.021134536 | -2.285608541 | 0.002039176 |
| 1700112E06Rik 76633  | -1.989886291 | 0.213433769 | -1.714700598 | 0.281517273 |
| Met 17295            | -1.990124393 | 0.018018379 | -1.990124393 | 0.018018379 |
| Ccdc102a 234582      | -1.990333019 | 0.068318823 | -3.101004576 | 0.018122458 |
| Snca 20617           | -1.997377461 | 0.098017793 | -1.449965718 | 0.203310794 |
| Al480653 268880      | -1.997884105 | 0.070172398 | -3.236555486 | 0.015861588 |

|                     |              |             |              |             |
|---------------------|--------------|-------------|--------------|-------------|
| Lgals1 16852        | -1.998289322 | 0.036164014 | -2.199159318 | 0.000635477 |
| Mfsd7b 226844       | -1.999057169 | 0.181457279 | -1.310987214 | 0.365074041 |
| Zfp81 224694        | -2           | 0.293589278 | 1            | #DIV/0!     |
| Ckap2l 70466        | -2           | 0.293589278 | 1            | #DIV/0!     |
| Slc29a2 13340       | -2.000787317 | 0.056326076 | -1.627865486 | 0.113646452 |
| Gm8221 666661       | -2.001053555 | 0.223204954 | -6.23615     | 0.093645599 |
| Spin2 278240        | -2.001053555 | 0.223204954 | -6.23615     | 0.093645599 |
| Nkapl 66707         | -2.001053555 | 0.223204954 | -6.23615     | 0.093645599 |
| Zfp169 67911        | -2.002286104 | 0.058246171 | -4.048670762 | 0.000959555 |
| Vnn1 22361          | -2.008079108 | 0.001146249 | -2.008079108 | 0.001146249 |
| Myh11 17880         | -2.009174895 | 0.181226041 | -1.171690729 | 0.264743498 |
| Trim68 101700       | -2.009378258 | 0.162622104 | -3.680625097 | 0.079834633 |
| 1700037C18Rik 73261 | -2.011255126 | 0.087303242 | -1.494317989 | 0.178226543 |
| Lsamp 268890        | -2.011313771 | 0.191665382 | -7.662133333 | 0.044268711 |
| Cenpo 52504         | -2.011623963 | 0.013237346 | -2.011623963 | 0.013237346 |
| Bex4 406217         | -2.012102784 | 0.112912358 | -2.012102784 | 0.112912358 |
| Ugt1a5 394433       | -2.014064327 | 0.004578147 | -2.396213952 | 0.001021307 |
| Syt1 20979          | -2.014198718 | 0.115157798 | -2.200400113 | 0.093994577 |
| Ttl13 101100        | -2.018480767 | 0.112449862 | -1.852159739 | 0.148833313 |
| Mad2l1 56150        | -2.01916291  | 0.156530084 | -4.476555556 | 0.052460665 |
| Nkain4 58237        | -2.020822946 | 0.194485374 | -8.0388      | 0.046362285 |
| Pcdh17 219228       | -2.021583677 | 0.100974076 | -4.249323052 | 0.013888815 |
| Ltbp3 16998         | -2.02340284  | 0.025329882 | -2.242701981 | 0.003267607 |
| 1700010I14Rik 66931 | -2.023936709 | 0.212274449 | -1.935026828 | 0.275417362 |
| C1rb 667277         | -2.024719533 | 0.16508133  | -3.410627532 | 0.095393078 |
| Slc26a2 13521       | -2.025054571 | 0.193616745 | -8.055633333 | 0.046112137 |
| Tgfb3 21809         | -2.026450382 | 0.071545744 | -1.648573331 | 0.145855148 |
| Olfm1 56177         | -2.030548711 | 0.040911657 | -2.030548711 | 0.040911657 |
| Rif1 51869          | -2.03191842  | 0.196625011 | -1.684453115 | 0.235002086 |
| S100a6 20200        | -2.03352718  | 0.183640662 | -3.684652689 | 0.031325192 |
| Pag1 94212          | -2.035909972 | 0.132017906 | -1.378781325 | 0.284084379 |
| Srebf1 20787        | -2.03682026  | 0.016377001 | -2.056418538 | 0.00947129  |
| L1cam 16728         | -2.039616574 | 0.115699646 | -1.520561372 | 0.236769574 |
| Tsc22d1 21807       | -2.042525523 | 0.015363949 | -1.836039932 | 0.032179597 |
| Zfp955a 77652       | -2.044476742 | 0.077959351 | -1.718607334 | 0.133587628 |
| Cd53 12508          | -2.046491201 | 0.019525816 | -2.370732748 | 0.001243303 |
| Gstcd 67553         | -2.048269349 | 0.111456195 | -1.505571555 | 0.231562551 |
| Rnls 67795          | -2.04835811  | 0.119269418 | -4.65400259  | 0.021961238 |
| 3010026O09Rik 68067 | -2.04887478  | 0.003769115 | -2.25135025  | 0.000555185 |
| Pcyt1b 236899       | -2.049118414 | 0.216296019 | -5.7948      | 0.078760145 |
| Prpsap2 212627      | -2.050845031 | 0.017526669 | -2.338380968 | 0.008697004 |
| Fam84a 105005       | -2.051522111 | 0.120673337 | -2.051522111 | 0.120673337 |
| Cenpn 72155         | -2.055175254 | 0.172940789 | -6.404816667 | 0.044430303 |
| Tbc1d19 67249       | -2.055194718 | 0.183033632 | -4.673019335 | 0.050653644 |
| Ttn 22138           | -2.056108832 | 0.19000698  | -8.179166667 | 0.047131331 |
| Flrt1 396184        | -2.056474071 | 0.045820433 | -2.449285622 | 0.005291819 |
| Fam70b 272465       | -2.056640928 | 0.260634069 | -2.8         | 0.173296754 |
| Gm12250 631323      | -2.056739856 | 0.07654734  | -3.752668649 | 0.012987395 |
| ORF63 224419        | -2.060872553 | 0.259850238 | -2.8202      | 0.173296754 |
| Trerf1 224829       | -2.062826416 | 0.115926538 | -3.182952324 | 0.045975943 |
| Prkar2b 19088       | -2.068438279 | 0.171659036 | -6.44615     | 0.04497135  |
| Ypel1 106369        | -2.068885773 | 0.189790204 | -1.151738686 | 0.425983244 |
| Kdm4c 76804         | -2.070343092 | 0.061898637 | -1.283944599 | 0.17736405  |

|                      |              |             |              |             |
|----------------------|--------------|-------------|--------------|-------------|
| Pcdhb22 93893        | -2.071064144 | 0.170222954 | -6.454333333 | 0.043911777 |
| Tmem163 72160        | -2.071449969 | 0.164004728 | -2.071449969 | 0.164004728 |
| Ttc39a 230603        | -2.07169007  | 0.103797613 | -2.07169007  | 0.103797613 |
| Muc1 17829           | -2.071895575 | 0.096327184 | -2.752179715 | 0.067447689 |
| Plscr2 18828         | -2.074604712 | 0.000858678 | -2.074604712 | 0.000858678 |
| Zfp354a 21408        | -2.075368581 | 0.032701521 | -2.075368581 | 0.032701521 |
| Lax1 240754          | -2.07672958  | 0.126778717 | -14.79178333 | 1.41502E-05 |
| Syt7 54525           | -2.079430312 | 0.034655335 | -2.079430312 | 0.034655335 |
| Auts2 319974         | -2.080084616 | 0.126317417 | -2.080084616 | 0.126317417 |
| Trim30a 20128        | -2.083036579 | 0.092618584 | -1.444691243 | 0.178694254 |
| Paqr6 68957          | -2.084327169 | 0.168965258 | -6.495666667 | 0.044433779 |
| Kdm3a 104263         | -2.084581251 | 0.034339365 | -2.404310652 | 0.008793082 |
| Raet1d 56554         | -2.085802437 | 0.029168041 | -1.695898315 | 0.042700423 |
| G630025P09Rik 74341  | -2.090524193 | 0.249174852 | -21.44690607 | 0.093588468 |
| 2010001M06Rik 69812  | -2.09431784  | 0.015741681 | -2.335115428 | 0.004596932 |
| Kazn 71529           | -2.095624333 | 0.035878602 | -2.095624333 | 0.035878602 |
| Mkx 210719           | -2.096343378 | 0.125877407 | -4.329287879 | 0.039981992 |
| Oas2 246728          | -2.099276916 | 0.013752827 | -2.099276916 | 0.013752827 |
| Mia2 338320          | -2.101707552 | 0.094854468 | -2.176878891 | 0.066598478 |
| Gamt 14431           | -2.10292548  | 0.005125387 | -2.47133404  | 0.002960401 |
| Ccdc14 239839        | -2.105362353 | 0.182612366 | -14.91298333 | 0.025273478 |
| Spag1 26942          | -2.106373293 | 0.187648848 | -2.090787879 | 0.212529809 |
| Itgal 16408          | -2.106568255 | 0.066908872 | -2.106568255 | 0.066908872 |
| Kcnab3 16499         | -2.108265924 | 0.136081663 | -1.304556138 | 0.302249255 |
| Ankrd37 654824       | -2.109369309 | 0.105947395 | -2.109369309 | 0.105947395 |
| Mfsd4 213006         | -2.109381504 | 0.166326609 | -1.632541037 | 0.217964699 |
| Mtap1b 17755         | -2.109435686 | 0.182789127 | -8.3913      | 0.047323967 |
| 4930452B06Rik 74430  | -2.109789858 | 0.188762108 | -1.137469949 | 0.432079999 |
| BC013712 230787      | -2.111102036 | 0.051373229 | -4.589794721 | 8.08424E-05 |
| Rpr1 19783           | -2.111690895 | 0.046109325 | -2.111690895 | 0.046109325 |
| Trim14 74735         | -2.118633609 | 0.020142815 | -2.566413    | 0.01328841  |
| Hdac9 79221          | -2.11914261  | 0.211056266 | -3.925       | 0.173296754 |
| Ttc12 235330         | -2.119797951 | 0.101973574 | -3.548816479 | 0.043809509 |
| Cd5 12507            | -2.121883366 | 0.180385446 | -8.440816667 | 0.046554152 |
| Prg4 96875           | -2.122054491 | 0.000738794 | -2.562681868 | 9.52412E-05 |
| Tmprss9 432478       | -2.123937143 | 0.204963277 | -6.194816667 | 0.093788939 |
| Rps6kl1 238323       | -2.124455432 | 0.233050069 | -1.29416451  | 0.382135102 |
| Ccdc126 57895        | -2.125380149 | 0.117443208 | -4.211948026 | 0.039415209 |
| A930015D03Rik 77810  | -2.126211544 | 0.017054522 | -2.126211544 | 0.017054522 |
| C530005A16Rik 654318 | -2.127449592 | 0.185714947 | -10.76386667 | 0.042008874 |
| H2-Q1 15006          | -2.127710849 | 0.065367474 | -2.127710849 | 0.065367474 |
| Ccdc67 234964        | -2.129077962 | 0.217007669 | -1.151755433 | 0.445938962 |
| Fgd1 14163           | -2.12958694  | 0.123752242 | -1.33425067  | 0.2645575   |
| Dimt1 66254          | -2.130326203 | 0.125645262 | -3.794636269 | 0.058410186 |
| Matn2 17181          | -2.130439108 | 0.156937792 | -2.392902078 | 0.098232087 |
| Spag8 433700         | -2.131711453 | 0.052958369 | -2.535591761 | 0.010005017 |
| Fam33a 66140         | -2.132012994 | 0.093481736 | -4.213442893 | 0.021945248 |
| Ift122 81896         | -2.133268831 | 0.045319142 | -2.133268831 | 0.045319142 |
| Zfp882 382019        | -2.133537499 | 0.010513446 | -1.556657416 | 0.026382135 |
| Zfp641 239652        | -2.135885189 | 0.074601683 | -1.572050156 | 0.144275213 |
| Bfsp1 12075          | -2.138108571 | 0.203349305 | -6.23615     | 0.093645599 |
| Pcdh18 73173         | -2.138108571 | 0.203349305 | -6.23615     | 0.093645599 |
| Cpxm2 55987          | -2.138650578 | 0.226980942 | 1.287350529  | 0.356134013 |

|                      |              |             |              |             |
|----------------------|--------------|-------------|--------------|-------------|
| Saa2 20209           | -2.140480969 | 0.123389169 | -6.094008494 | 0.01856575  |
| Fgl2 14190           | -2.1428024   | 0.149982927 | -1.218889544 | 0.347562276 |
| Map3k15 270672       | -2.142966048 | 0.127044585 | -2.695412121 | 0.103958819 |
| Gm5901 545989        | -2.143887778 | 0.284786919 | 1            | #DIV/0!     |
| Tmem221 434325       | -2.145023279 | 0.101128193 | -2.145023279 | 0.101128193 |
| Dct 13190            | -2.14543621  | 0.072780038 | -3.60068269  | 0.005941273 |
| Pdzd2 68070          | -2.145761219 | 0.192743788 | -2.528222571 | 0.213970332 |
| Ms4a8a 64381         | -2.148161588 | 0.203769197 | -3.245448485 | 0.128662    |
| Fcgr1 14129          | -2.149051975 | 0.022208125 | -3.230967981 | 0.0015659   |
| Pvrl4 71740          | -2.151133523 | 0.026763451 | -1.799882127 | 0.048905899 |
| Trip11 109181        | -2.154039425 | 0.189410248 | -1.081750489 | 0.455876868 |
| Dsg1c 211924         | -2.157538549 | 0.086961662 | -3.231232245 | 0.046535676 |
| Fam55b 78252         | -2.157615528 | 0.015993626 | -2.157615528 | 0.015993626 |
| Bspry 192120         | -2.15779791  | 0.164202615 | -4.56078     | 0.070574133 |
| Plscr4 235527        | -2.158349577 | 0.059126306 | -1.697466591 | 0.118072188 |
| Atp7b 11979          | -2.158909876 | 0.07792219  | -1.632178033 | 0.1590466   |
| Nek1 18004           | -2.159487014 | 0.151040841 | -5.381832196 | 0.052347267 |
| Cyp2d11 545123       | -2.159876561 | 0.02155677  | -1.505090398 | 0.059304487 |
| Vmn2r29 76229        | -2.159933081 | 0.239044833 | -4.6202      | 0.07056113  |
| Rspo1 192199         | -2.160284926 | 0.084767199 | -3.443237573 | 0.0375981   |
| Snhg11 319317        | -2.162029369 | 0.120578338 | -3.750113236 | 0.053068718 |
| Cyp4f41-ps 77875     | -2.163199384 | 0.163339522 | -4.58098     | 0.070596339 |
| Slc44a3 213603       | -2.165217796 | 0.047649818 | -3.189564283 | 0.017879057 |
| Slc24a3 94249        | -2.165726745 | 0.136893432 | -4.354087329 | 0.058838492 |
| Zfp78 330463         | -2.169777899 | 0.092045824 | -3.046232117 | 0.052673028 |
| Col27a1 373864       | -2.169968924 | 0.029790369 | -1.739693855 | 0.041724487 |
| Golt1b 66964         | -2.170022613 | 0.007621502 | -2.143668492 | 0.00705986  |
| Akap17b 338351       | -2.17307714  | 0.13639866  | -1.421311974 | 0.293279282 |
| Apol11b 328563       | -2.175857684 | 0.204988494 | -1.72578057  | 0.278974436 |
| Cnih2 12794          | -2.176769117 | 0.10753859  | -3.194032296 | 0.046780431 |
| Sned1 208777         | -2.177176195 | 0.054408035 | -1.686454286 | 0.102388555 |
| Xpnp3 321003         | -2.178364004 | 0.032212946 | -2.499142486 | 0.017295365 |
| Kif26a 668303        | -2.17965385  | 0.097660755 | -2.17965385  | 0.097660755 |
| Abcc4 239273         | -2.182880837 | 0.027511359 | -2.182880837 | 0.027511359 |
| Mvk 17855            | -2.186118721 | 0.005084855 | -2.186118721 | 0.005084855 |
| 5830403L16Rik 240817 | -2.186303598 | 0.194725898 | -6.60118     | 0.089542423 |
| 9530091C08Rik 320440 | -2.191158574 | 0.155337017 | -3.772567698 | 0.096195335 |
| Pgap1 241062         | -2.194541037 | 0.184609057 | -6.8996      | 0.070566833 |
| Mcf2l 17207          | -2.196306932 | 0.194332322 | -6.56078     | 0.089099836 |
| Dbn1 72185           | -2.201708571 | 0.149853351 | -6.42165     | 0.04426109  |
| Rundc2a 385605       | -2.201708571 | 0.149853351 | -6.42165     | 0.04426109  |
| Lck 16818            | -2.202222352 | 0.071127357 | -2.997788186 | 0.046481411 |
| Traf3ip3 215243      | -2.203647852 | 0.082646632 | -4.800038482 | 0.005589043 |
| Fdps 110196          | -2.205405452 | 0.03107761  | -1.648206617 | 0.052114915 |
| Osr1 23967           | -2.205623086 | 0.266859735 | -3.925       | 0.173296754 |
| Ccdc112 240261       | -2.206415744 | 0.192366027 | -6.6202      | 0.087728953 |
| 1500031L02Rik 66994  | -2.209785183 | 0.048063549 | -2.209785183 | 0.048063549 |
| Trpc3 22065          | -2.210108571 | 0.149695126 | -6.44615     | 0.04497135  |
| Shank2 210274        | -2.210962063 | 0.030942987 | -2.354073878 | 0.005347169 |
| Fbxl7 448987         | -2.212914286 | 0.148235538 | -6.454333333 | 0.043911777 |
| Mefv 54483           | -2.212914286 | 0.148235538 | -6.454333333 | 0.043911777 |
| Agtpbp1 67269        | -2.216974635 | 0.022794178 | -3.869968394 | 0.000433549 |
| Gm5113 330503        | -2.220127798 | 0.21795853  | -10.875      | 0.093289779 |

|                      |              |             |              |             |
|----------------------|--------------|-------------|--------------|-------------|
| Hoxb2 103889         | -2.22126845  | 0.056960865 | -1.726179098 | 0.111569177 |
| Sbsn 282619          | -2.222366394 | 0.043898134 | -1.859152332 | 0.089917904 |
| Lrrcc1 71710         | -2.222805202 | 0.120304071 | -4.96812931  | 0.039290251 |
| Trdmt1 13434         | -2.222831424 | 0.00557498  | -2.457412942 | 0.000201519 |
| Cytip 227929         | -2.225197518 | 0.080495503 | -1.717169224 | 0.16500186  |
| I830077J02Rik 433638 | -2.227085714 | 0.147268402 | -6.495666667 | 0.044433779 |
| Ptch2 19207          | -2.23042676  | 0.083024142 | -1.612564007 | 0.167745938 |
| Csdc2 105859         | -2.232032051 | 0.110114588 | -2.629015854 | 0.067030285 |
| Grhl2 252973         | -2.232568214 | 0.198201397 | -6.95765     | 0.094047919 |
| Dok4 114255          | -2.235081162 | 0.00864061  | -1.924495238 | 0.025862351 |
| Ern1 78943           | -2.236054103 | 0.03825844  | -1.473007062 | 0.095278674 |
| Abcb1a 18671         | -2.236545052 | 0.035130182 | -1.539606843 | 0.094669528 |
| Zswim3 67538         | -2.23683097  | 0.131381789 | -2.178440208 | 0.179699967 |
| Bard1 12021          | -2.241874286 | 0.194723882 | -3.925       | 0.173296754 |
| Acta2 11475          | -2.242194257 | 0.239088122 | -1.058653504 | 0.437113281 |
| Mterfd3 74238        | -2.247011366 | 0.106793656 | -1.495670894 | 0.223101858 |
| Cd274 60533          | -2.249948892 | 0.082636699 | -2.536606624 | 0.06782142  |
| Arap2 212285         | -2.250182863 | 0.032373611 | -2.480900876 | 0.035830014 |
| Lrrc8e 72267         | -2.250939227 | 0.093002716 | -1.667235359 | 0.192078613 |
| Ace 11421            | -2.253230542 | 0.063772244 | -2.207376425 | 0.078825309 |
| Cyp2a22 233005       | -2.254935741 | 0.002294043 | -2.093057153 | 0.005736526 |
| Gm14446 667373       | -2.264285714 | 0.193051427 | -3.925       | 0.173296754 |
| Cyp51 13121          | -2.267493286 | 0.071704615 | -1.486463048 | 0.012858179 |
| Casq1 12372          | -2.274313339 | 0.15693707  | -16.1991     | 0.023548285 |
| Bbs5 72569           | -2.274766101 | 0.100028865 | -4.063318182 | 0.045249537 |
| Sspo 243369          | -2.278171787 | 0.143955391 | -3.221509091 | 0.127882662 |
| 41155 24050          | -2.278457143 | 0.191540287 | -3.9746      | 0.173296754 |
| Zfp867 237775        | -2.280943652 | 0.033978584 | -2.280943652 | 0.033978584 |
| Zranb3 226409        | -2.283243483 | 0.071929572 | -4.446816333 | 0.017615005 |
| Socs1 12703          | -2.283504809 | 0.207861329 | 1.060234708  | 0.471507944 |
| Fbln7 70370          | -2.287522151 | 0.052558468 | -1.657367521 | 0.063478851 |
| Gpr65 14744          | -2.28800522  | 0.126583012 | -2.264525909 | 0.158102501 |
| Wdr27 71682          | -2.291317238 | 0.1242064   | -1.560752707 | 0.260403166 |
| Sox10 20665          | -2.292313107 | 0.221828508 | -3.925       | 0.173296754 |
| Atf7 223922          | -2.294592172 | 0.072279564 | -1.716996305 | 0.145885919 |
| Slain1 105439        | -2.297939911 | 0.193498082 | -4.6202      | 0.07056113  |
| Vps13a 271564        | -2.298047956 | 0.069493624 | -2.736379933 | 0.022880753 |
| B4galnt3 330406      | -2.298762119 | 0.111316826 | -2.862593939 | 0.100767863 |
| 6030446N20Rik 338363 | -2.299689913 | 0.010252773 | -2.582901086 | 0.001539078 |
| Gmpr 66355           | -2.303529838 | 0.037745975 | -3.567566147 | 0.01203082  |
| Setmar 74729         | -2.305286428 | 0.020058625 | -1.954270207 | 0.037299787 |
| Bmpr2 12168          | -2.305337918 | 0.101938088 | -3.083674272 | 0.078319454 |
| AU021092 239691      | -2.305483375 | 0.057350455 | -3.172195126 | 0.036628887 |
| Ifi203 15950         | -2.306026725 | 0.04570083  | -2.34961222  | 0.00248706  |
| Plekhn1 231002       | -2.307429899 | 0.104565907 | -4.547924695 | 0.029978483 |
| Nsdhl 18194          | -2.30950207  | 0.007003017 | -2.040982448 | 0.016026504 |
| Slc2a4 20528         | -2.309737456 | 0.210498672 | -4.30878     | 0.173296754 |
| Lrrc49 102747        | -2.313601113 | 0.118077465 | -9.203466667 | 0.015035698 |
| Adam32 353188        | -2.313954577 | 0.14700288  | -16.48145    | 0.019808349 |
| Pram1 378460         | -2.315024568 | 0.078638192 | -1.639973789 | 0.152831797 |
| Gm13695 545432       | -2.316412378 | 0.102767807 | -1.998898774 | 0.136819957 |
| Akap12 83397         | -2.322773165 | 0.054065207 | -3.401457717 | 0.028422563 |
| Zfp931 353208        | -2.323431231 | 0.187460159 | -4.56078     | 0.070574133 |

|                      |              |             |              |             |
|----------------------|--------------|-------------|--------------|-------------|
| Magee1 107528        | -2.326533015 | 0.206301278 | 1.085043178  | 0.458319617 |
| Aoc2 237940          | -2.32929831  | 0.071807351 | -2.336813633 | 0.075249344 |
| BC068157 73072       | -2.330602604 | 0.05302311  | -4.716460667 | 0.001683677 |
| Atp6v0e2 76252       | -2.33114795  | 0.087076513 | -2.33114795  | 0.087076513 |
| Prr5l 72446          | -2.331723794 | 0.016698214 | -2.331723794 | 0.016698214 |
| Acsbg1 94180         | -2.332142513 | 0.188677129 | -7.267966667 | 0.093239512 |
| Kcnc1 16500          | -2.332860712 | 0.139146574 | -2.332860712 | 0.139146574 |
| Pwpp2b 101631        | -2.333082812 | 0.003198591 | -2.868934676 | 0.000410342 |
| Epb4.9 13829         | -2.334786788 | 0.047115714 | -1.795753715 | 0.084104014 |
| Praf2 54637          | -2.335358464 | 0.002319478 | -1.9518596   | 0.004556606 |
| Htra1 56213          | -2.335927869 | 0.09785167  | -3.541561269 | 0.063400858 |
| Glrp1 14659          | -2.336891809 | 0.146206415 | -9.296116667 | 0.038064488 |
| Bmp2k 140780         | -2.339989054 | 0.039105669 | -2.863598716 | 0.013143338 |
| Nr1d1 217166         | -2.340078178 | 0.002919911 | -3.200631657 | 6.64799E-05 |
| Gna14 14675          | -2.340912973 | 0.04840399  | -3.744955172 | 0.009079915 |
| Pilrb1 170741        | -2.341334425 | 0.104809068 | -1.635532836 | 0.219157359 |
| Cyp2a5 13087         | -2.341902722 | 0.010276344 | -2.94543875  | 0.0058087   |
| Tmem150b 330460      | -2.34237074  | 0.061529096 | -4.975806489 | 0.003162203 |
| Lrp2bp 67620         | -2.343530739 | 0.140521033 | -1.359327497 | 0.314310072 |
| Reep1 52250          | -2.344121674 | 0.018943107 | -2.616726404 | 0.007791565 |
| Mtr 238505           | -2.34449241  | 0.007606112 | -1.682788568 | 0.012534845 |
| Olfr1393 258463      | -2.344960647 | 0.109557264 | -8.933166667 | 0.013413549 |
| Adap2 216991         | -2.348915085 | 0.033034252 | -1.88824872  | 0.058725951 |
| A930005I04Rik 403174 | -2.349957029 | 0.201173836 | 1.02215228   | 0.489259865 |
| Xaf1 327959          | -2.350170288 | 0.00301564  | -2.069710316 | 0.002940241 |
| Cdc14a 229776        | -2.35105154  | 0.090543249 | -4.101087113 | 0.043493317 |
| Trim30d 209387       | -2.351239807 | 0.121285403 | -4.429154902 | 0.063880629 |
| Nbeal1 269198        | -2.355192665 | 0.099723943 | -1.624263637 | 0.207971345 |
| Irs3 16369           | -2.356170096 | 0.088661358 | -1.641023522 | 0.180096118 |
| Csf1 12977           | -2.356562165 | 0.005205422 | -2.122203276 | 0.012120914 |
| Gpr64 237175         | -2.357703267 | 0.025337065 | -3.99730858  | 0.003228156 |
| 2010002N04Rik 106878 | -2.362514433 | 0.0775566   | -1.664763609 | 0.149692992 |
| A130022J15Rik 101351 | -2.364690476 | 0.058930027 | -2.547954885 | 0.012114491 |
| Kcnq1ot1 63830       | -2.36901595  | 0.0640468   | -2.613756821 | 0.027203788 |
| Tmem91 320208        | -2.369262939 | 0.135524133 | -7.38365     | 0.04272972  |
| Bank1 242248         | -2.371930395 | 0.074313325 | -4.337411179 | 0.02766758  |
| 2810422O20Rik 69962  | -2.374070307 | 0.004490514 | -2.039998079 | 0.002968709 |
| Ogn 18295            | -2.379630401 | 0.152766303 | -8.40118     | 0.035583449 |
| Cenpm 66570          | -2.38506934  | 0.000119107 | -2.569822217 | 4.24492E-05 |
| 1700029J11Rik 76426  | -2.38548     | 0.181585296 | -6.95765     | 0.094047919 |
| Serpine1 18787       | -2.387113871 | 0.152626978 | -1.279998358 | 0.35286604  |
| Ttf2 74044           | -2.393359629 | 0.055924349 | -3.909889821 | 0.010532407 |
| Ddx60 234311         | -2.396313184 | 0.050310908 | -2.886180831 | 0.01258836  |
| Zfp709 236193        | -2.398352187 | 0.078259377 | -2.398352187 | 0.078259377 |
| Efemp2 58859         | -2.402004797 | 0.014259857 | -1.979583226 | 0.01599175  |
| Psat1 107272         | -2.402130058 | 0.111106304 | -9.555633333 | 0.016606094 |
| Rab19 19331          | -2.405064509 | 0.105933962 | -9.162133333 | 0.014939816 |
| Armcx6 278097        | -2.408661177 | 0.04900158  | -2.408661177 | 0.04900158  |
| Calml4 75600         | -2.408744957 | 0.137001188 | -3.218533333 | 0.075309191 |
| Prrt3 210673         | -2.412520582 | 0.110120093 | -9.596966667 | 0.016642218 |
| Dapp1 26377          | -2.414528582 | 0.036843468 | -2.414528582 | 0.036843468 |
| H2-T22 15039         | -2.417270465 | 0.112836013 | -1.874584596 | 0.116901717 |
| Igsf10 242050        | -2.41871422  | 0.068111909 | -4.233000208 | 0.028188468 |

|                      |              |             |              |             |
|----------------------|--------------|-------------|--------------|-------------|
| Zfp418 232854        | -2.419048857 | 0.036910115 | -4.542719147 | 0.005528153 |
| Adc 242669           | -2.41927444  | 0.047564015 | -1.83391025  | 0.082981207 |
| Rsph1 22092          | -2.420333288 | 0.104403332 | -9.2203      | 0.014927457 |
| Tbc1d4 210789        | -2.428263101 | 0.025789195 | -2.428263101 | 0.025789195 |
| Snaaip 67847         | -2.430207431 | 0.169529955 | -1.784568438 | 0.237848562 |
| Awat2 245532         | -2.431125758 | 0.017135631 | -2.431125758 | 0.017135631 |
| Lbx2 16815           | -2.432135971 | 0.118898654 | -4.18746398  | 0.074433504 |
| Mfsd2b 432628        | -2.434748567 | 0.11368475  | -4.224792929 | 0.068876081 |
| Stap1 56792          | -2.436005904 | 0.21603094  | -2.76078     | 0.173296754 |
| Mphosph6 68533       | -2.441450831 | 0.036320897 | -4.333676353 | 0.00219841  |
| Naip1 17940          | -2.442153333 | 0.147460321 | -7.63538     | 0.025880344 |
| Ehf 13661            | -2.444290267 | 0.128208988 | -17.40978333 | 0.017225558 |
| Itпка 228550         | -2.444621122 | 0.075681408 | -1.306117158 | 0.083688436 |
| Chmp4c 66371         | -2.446414369 | 0.15887028  | -2.230407828 | 0.191047562 |
| Hs3st6 328779        | -2.447205208 | 0.031366957 | -1.970747526 | 0.056708232 |
| Gm14137 623781       | -2.453769305 | 0.120620667 | -3.41653147  | 0.056204377 |
| Acot3 171281         | -2.460725044 | 0.000123639 | -2.460725044 | 0.000123639 |
| Cyb5d1 327951        | -2.464340245 | 0.039804388 | -2.464340245 | 0.039804388 |
| Hemgn 93966          | -2.467316667 | 0.170446566 | 1            | #DIV/0!     |
| Il9r 16199           | -2.467316667 | 0.170446566 | 1            | #DIV/0!     |
| Gsg1 14840           | -2.467316667 | 0.170446566 | 1            | #DIV/0!     |
| Phyhip 105653        | -2.467316667 | 0.170446566 | 1            | #DIV/0!     |
| 4930503E24Rik 75030  | -2.467316667 | 0.170446566 | 1            | #DIV/0!     |
| Wbscr17 212996       | -2.467316667 | 0.170446566 | 1            | #DIV/0!     |
| P2rx5 94045          | -2.467316667 | 0.170446566 | 1            | #DIV/0!     |
| Pla2g3 237625        | -2.467316667 | 0.170446566 | 1            | #DIV/0!     |
| Aox3l1 213043        | -2.467316667 | 0.170446566 | 1            | #DIV/0!     |
| 2900060B14Rik 68204  | -2.467316667 | 0.170446566 | 1            | #DIV/0!     |
| AY358078 278676      | -2.467316667 | 0.170446566 | 1            | #DIV/0!     |
| Gpr81 243270         | -2.467316667 | 0.170446566 | 1            | #DIV/0!     |
| Cnpy1 269637         | -2.467316667 | 0.170446566 | 1            | #DIV/0!     |
| E030011O05Rik 319859 | -2.467316667 | 0.170446566 | 1            | #DIV/0!     |
| Cryaa 12954          | -2.467316667 | 0.170446566 | 1            | #DIV/0!     |
| Kcnh4 380728         | -2.467316667 | 0.170446566 | 1            | #DIV/0!     |
| Gm5741 436049        | -2.467316667 | 0.170446566 | 1            | #DIV/0!     |
| Clic6 209195         | -2.467316667 | 0.170446566 | 1            | #DIV/0!     |
| Upk1a 109637         | -2.467316667 | 0.170446566 | 1            | #DIV/0!     |
| Chst10 98388         | -2.467316667 | 0.170446566 | 1            | #DIV/0!     |
| 4931408C20Rik 210940 | -2.467316667 | 0.170446566 | 1            | #DIV/0!     |
| Got1l1 76615         | -2.467316667 | 0.170446566 | 1            | #DIV/0!     |
| E330020D12Rik 626058 | -2.467316667 | 0.170446566 | 1            | #DIV/0!     |
| Kcnh3 16512          | -2.467316667 | 0.170446566 | 1            | #DIV/0!     |
| Asb14 142687         | -2.467316667 | 0.170446566 | 1            | #DIV/0!     |
| Krtap3-3 66380       | -2.467316667 | 0.170446566 | 1            | #DIV/0!     |
| Glra2 237213         | -2.467316667 | 0.170446566 | 1            | #DIV/0!     |
| 1600029I14Rik 69797  | -2.467316667 | 0.170446566 | 1            | #DIV/0!     |
| Asf1b 66929          | -2.467316667 | 0.170446566 | 1            | #DIV/0!     |
| Rhebl1 69159         | -2.467316667 | 0.170446566 | 1            | #DIV/0!     |
| Tmc3 233424          | -2.467316667 | 0.170446566 | 1            | #DIV/0!     |
| Gpr115 78249         | -2.467316667 | 0.170446566 | 1            | #DIV/0!     |
| 9930013L23Rik 80982  | -2.467316667 | 0.170446566 | 1            | #DIV/0!     |
| 9030612E09Rik 74530  | -2.467316667 | 0.170446566 | 1            | #DIV/0!     |
| Bbs12 241950         | -2.467316667 | 0.170446566 | 1            | #DIV/0!     |

|                       |              |             |   |         |
|-----------------------|--------------|-------------|---|---------|
| Alox12e 11685         | -2.467316667 | 0.170446566 | 1 | #DIV/0! |
| Pak7 241656           | -2.467316667 | 0.170446566 | 1 | #DIV/0! |
| Cd69 12515            | -2.467316667 | 0.170446566 | 1 | #DIV/0! |
| Esyt3 272636          | -2.467316667 | 0.170446566 | 1 | #DIV/0! |
| Ebf3 13593            | -2.467316667 | 0.170446566 | 1 | #DIV/0! |
| Dkk2 56811            | -2.467316667 | 0.170446566 | 1 | #DIV/0! |
| Wfdc12 192200         | -2.467316667 | 0.170446566 | 1 | #DIV/0! |
| Klk10 69540           | -2.467316667 | 0.170446566 | 1 | #DIV/0! |
| Nova1 664883          | -2.467316667 | 0.170446566 | 1 | #DIV/0! |
| Al427809 381524       | -2.467316667 | 0.170446566 | 1 | #DIV/0! |
| 1700019D03Rik 67080   | -2.467316667 | 0.170446566 | 1 | #DIV/0! |
| Mdga2 320772          | -2.467316667 | 0.170446566 | 1 | #DIV/0! |
| Ankrd53 75305         | -2.467316667 | 0.170446566 | 1 | #DIV/0! |
| Casc1 320662          | -2.467316667 | 0.170446566 | 1 | #DIV/0! |
| 9130008F23Rik 71583   | -2.467316667 | 0.170446566 | 1 | #DIV/0! |
| BY080835 434436       | -2.467316667 | 0.170446566 | 1 | #DIV/0! |
| Hrh2 15466            | -2.467316667 | 0.170446566 | 1 | #DIV/0! |
| Aqp7 11832            | -2.467316667 | 0.170446566 | 1 | #DIV/0! |
| Bend5 67621           | -2.467316667 | 0.170446566 | 1 | #DIV/0! |
| Txlnb 378431          | -2.467316667 | 0.170446566 | 1 | #DIV/0! |
| Butr1 192194          | -2.467316667 | 0.170446566 | 1 | #DIV/0! |
| 9930111J21Rik2 245240 | -2.467316667 | 0.170446566 | 1 | #DIV/0! |
| Ercc6l 236930         | -2.467316667 | 0.170446566 | 1 | #DIV/0! |
| C030034L19Rik 320088  | -2.467316667 | 0.170446566 | 1 | #DIV/0! |
| Klre1 243655          | -2.467316667 | 0.170446566 | 1 | #DIV/0! |
| Nxph3 104079          | -2.467316667 | 0.170446566 | 1 | #DIV/0! |
| Klhl30 70788          | -2.467316667 | 0.170446566 | 1 | #DIV/0! |
| Ffar2 233079          | -2.467316667 | 0.170446566 | 1 | #DIV/0! |
| Rnf151 67504          | -2.467316667 | 0.170446566 | 1 | #DIV/0! |
| 2900011O08Rik 67254   | -2.467316667 | 0.170446566 | 1 | #DIV/0! |
| Gm5434 432649         | -2.467316667 | 0.170446566 | 1 | #DIV/0! |
| Kcnrgl 328424         | -2.467316667 | 0.170446566 | 1 | #DIV/0! |
| Asxl3 211961          | -2.467316667 | 0.170446566 | 1 | #DIV/0! |
| Tmod4 50874           | -2.467316667 | 0.170446566 | 1 | #DIV/0! |
| Akap4 11643           | -2.467316667 | 0.170446566 | 1 | #DIV/0! |
| 4930519F09Rik 114676  | -2.467316667 | 0.170446566 | 1 | #DIV/0! |
| Ankrd34b 218440       | -2.467316667 | 0.170446566 | 1 | #DIV/0! |
| Nkpd1 69547           | -2.467316667 | 0.170446566 | 1 | #DIV/0! |
| 4930415O20Rik 73863   | -2.467316667 | 0.170446566 | 1 | #DIV/0! |
| Prss12 19142          | -2.467316667 | 0.170446566 | 1 | #DIV/0! |
| Xlr3c 22446           | -2.467316667 | 0.170446566 | 1 | #DIV/0! |
| Vwde 232585           | -2.467316667 | 0.170446566 | 1 | #DIV/0! |
| Mia1 12587            | -2.467316667 | 0.170446566 | 1 | #DIV/0! |
| Asb15 78910           | -2.467316667 | 0.170446566 | 1 | #DIV/0! |
| Mpl 17480             | -2.467316667 | 0.170446566 | 1 | #DIV/0! |
| Krt17 16667           | -2.467316667 | 0.170446566 | 1 | #DIV/0! |
| Asprv1 67855          | -2.467316667 | 0.170446566 | 1 | #DIV/0! |
| Slc1a7 242607         | -2.467316667 | 0.170446566 | 1 | #DIV/0! |
| Adora3 11542          | -2.467316667 | 0.170446566 | 1 | #DIV/0! |
| Stk32b 64293          | -2.467316667 | 0.170446566 | 1 | #DIV/0! |
| Fam181a 544888        | -2.467316667 | 0.170446566 | 1 | #DIV/0! |
| Dnahc10 56087         | -2.467316667 | 0.170446566 | 1 | #DIV/0! |
| Rims4 241770          | -2.467316667 | 0.170446566 | 1 | #DIV/0! |



|                       |              |             |              |             |
|-----------------------|--------------|-------------|--------------|-------------|
| Ltk 17005             | -2.467316667 | 0.170446566 | 1            | #DIV/0!     |
| Zdhhc2 70546          | -2.469109987 | 0.128219642 | -7.694816667 | 0.043805315 |
| Tmem132a 98170        | -2.47305614  | 0.004034079 | -2.47305614  | 0.004034079 |
| Ifit2 15958           | -2.475630438 | 0.040072871 | -2.475630438 | 0.040072871 |
| Rest 19712            | -2.479656116 | 0.168970511 | -2.089837133 | 0.111438353 |
| Sema3b 20347          | -2.481874951 | 0.116927513 | -1.56427143  | 0.249669356 |
| Nol3 78688            | -2.48611173  | 0.006129612 | -2.262502597 | 0.013511875 |
| Slc4a3 20536          | -2.487720157 | 0.048737542 | -1.97204547  | 0.098007258 |
| BC048644 407789       | -2.492585253 | 0.033972385 | -1.614372315 | 0.09438735  |
| Skap1 78473           | -2.499185393 | 0.089617817 | -1.794873935 | 0.185152809 |
| Serpina3f 238393      | -2.499977956 | 0.004690186 | -2.846016578 | 0.0002449   |
| Prkag3 241113         | -2.5         | 0.170446566 | 1            | #DIV/0!     |
| Als2cr12 108812       | -2.5         | 0.170446566 | 1            | #DIV/0!     |
| Rapsn 19400           | -2.5         | 0.170446566 | 1            | #DIV/0!     |
| Zfp389 100038371      | -2.5         | 0.170446566 | 1            | #DIV/0!     |
| Wasf3 245880          | -2.5         | 0.170446566 | 1            | #DIV/0!     |
| Gm13152 195531        | -2.5         | 0.170446566 | 1            | #DIV/0!     |
| Slc1a6 20513          | -2.5         | 0.170446566 | 1            | #DIV/0!     |
| Kcnq4 60613           | -2.5         | 0.170446566 | 1            | #DIV/0!     |
| A930013F10Rik 68074   | -2.5         | 0.170446566 | 1            | #DIV/0!     |
| Zfp677 210503         | -2.5         | 0.170446566 | 1            | #DIV/0!     |
| 9130024F11Rik 329160  | -2.5         | 0.170446566 | 1            | #DIV/0!     |
| Lrch2 210297          | -2.5         | 0.170446566 | 1            | #DIV/0!     |
| Sult4a1 29859         | -2.5         | 0.170446566 | 1            | #DIV/0!     |
| Ankrd61 66729         | -2.5         | 0.170446566 | 1            | #DIV/0!     |
| Diras2 68203          | -2.5         | 0.170446566 | 1            | #DIV/0!     |
| Cdh6 12563            | -2.5         | 0.170446566 | 1            | #DIV/0!     |
| 4933427E11Rik 66769   | -2.5         | 0.170446566 | 1            | #DIV/0!     |
| Syn2 20965            | -2.5         | 0.170446566 | 1            | #DIV/0!     |
| Gm410 242037          | -2.5         | 0.170446566 | 1            | #DIV/0!     |
| Vmn2r57 269902        | -2.5         | 0.170446566 | 1            | #DIV/0!     |
| 9230116N13Rik 320054  | -2.5         | 0.170446566 | 1            | #DIV/0!     |
| Begain 380785         | -2.5         | 0.170446566 | 1            | #DIV/0!     |
| 1700019N12Rik 67077   | -2.5         | 0.170446566 | 1            | #DIV/0!     |
| Zfp202 80902          | -2.5         | 0.170446566 | 1            | #DIV/0!     |
| Mmp25 240047          | -2.5         | 0.170446566 | 1            | #DIV/0!     |
| Pdx1 18609            | -2.5         | 0.170446566 | 1            | #DIV/0!     |
| Zfp811 240063         | -2.5         | 0.170446566 | 1            | #DIV/0!     |
| Gm1564 268491         | -2.5         | 0.170446566 | 1            | #DIV/0!     |
| Gnb3 14695            | -2.5         | 0.170446566 | 1            | #DIV/0!     |
| Tmeff2 56363          | -2.5         | 0.170446566 | 1            | #DIV/0!     |
| Dnahc7b 227058        | -2.5         | 0.170446566 | 1            | #DIV/0!     |
| Phf16 382207          | -2.5         | 0.170446566 | 1            | #DIV/0!     |
| Cabp1 29867           | -2.5         | 0.170446566 | 1            | #DIV/0!     |
| Accn1 11418           | -2.5         | 0.170446566 | 1            | #DIV/0!     |
| Nrcam 319504          | -2.5         | 0.170446566 | 1            | #DIV/0!     |
| Gbgt1 227671          | -2.5         | 0.170446566 | 1            | #DIV/0!     |
| D5Erttd605e 100039805 | -2.5         | 0.170446566 | 1            | #DIV/0!     |
| Tecta 21683           | -2.5         | 0.170446566 | 1            | #DIV/0!     |
| Zfp72 238722          | -2.5         | 0.170446566 | 1            | #DIV/0!     |
| Ptprq 237523          | -2.5         | 0.170446566 | 1            | #DIV/0!     |
| Myadml2 68515         | -2.5         | 0.170446566 | 1            | #DIV/0!     |
| Zdhhc15 108672        | -2.5         | 0.170446566 | 1            | #DIV/0!     |

|                        |      |             |   |         |
|------------------------|------|-------------|---|---------|
| Olfr1030 258581        | -2.5 | 0.170446566 | 1 | #DIV/0! |
| Smok3b 622474          | -2.5 | 0.170446566 | 1 | #DIV/0! |
| Trank1 320429          | -2.5 | 0.170446566 | 1 | #DIV/0! |
| 6330406115Rik 70717    | -2.5 | 0.170446566 | 1 | #DIV/0! |
| Drp2 13497             | -2.5 | 0.170446566 | 1 | #DIV/0! |
| LOC100038947 100038947 | -2.5 | 0.170446566 | 1 | #DIV/0! |
| Clvs1 74438            | -2.5 | 0.170446566 | 1 | #DIV/0! |
| Oit1 18300             | -2.5 | 0.170446566 | 1 | #DIV/0! |
| Bcas1 76960            | -2.5 | 0.170446566 | 1 | #DIV/0! |
| Aff2 14266             | -2.5 | 0.170446566 | 1 | #DIV/0! |
| Tpsab1 17230           | -2.5 | 0.170446566 | 1 | #DIV/0! |
| Gm13051 626316         | -2.5 | 0.170446566 | 1 | #DIV/0! |
| Syce3 75459            | -2.5 | 0.170446566 | 1 | #DIV/0! |
| 9330182L06Rik 231014   | -2.5 | 0.170446566 | 1 | #DIV/0! |
| Cenpi 102920           | -2.5 | 0.170446566 | 1 | #DIV/0! |
| Nrg2 100042150         | -2.5 | 0.170446566 | 1 | #DIV/0! |
| Pcdhb7 93878           | -2.5 | 0.170446566 | 1 | #DIV/0! |
| Umodl1 52020           | -2.5 | 0.170446566 | 1 | #DIV/0! |
| Col24a1 71355          | -2.5 | 0.170446566 | 1 | #DIV/0! |
| Ism1 319909            | -2.5 | 0.170446566 | 1 | #DIV/0! |
| Trpm8 171382           | -2.5 | 0.170446566 | 1 | #DIV/0! |
| Gm14393 664987         | -2.5 | 0.170446566 | 1 | #DIV/0! |
| Foxh1 14106            | -2.5 | 0.170446566 | 1 | #DIV/0! |
| Rad51ap1 19362         | -2.5 | 0.170446566 | 1 | #DIV/0! |
| Cnga4 233649           | -2.5 | 0.170446566 | 1 | #DIV/0! |
| Olfml2a 241327         | -2.5 | 0.170446566 | 1 | #DIV/0! |
| Gpr174 213439          | -2.5 | 0.170446566 | 1 | #DIV/0! |
| Glis3 226075           | -2.5 | 0.170446566 | 1 | #DIV/0! |
| Oxct2b 353371          | -2.5 | 0.170446566 | 1 | #DIV/0! |
| Krt222 268481          | -2.5 | 0.170446566 | 1 | #DIV/0! |
| Gfi1b 14582            | -2.5 | 0.170446566 | 1 | #DIV/0! |
| Mall 228576            | -2.5 | 0.170446566 | 1 | #DIV/0! |
| Trem3 58218            | -2.5 | 0.170446566 | 1 | #DIV/0! |
| Atp6v0a4 140494        | -2.5 | 0.170446566 | 1 | #DIV/0! |
| Slc29a4 243328         | -2.5 | 0.170446566 | 1 | #DIV/0! |
| Kcnq5 226922           | -2.5 | 0.170446566 | 1 | #DIV/0! |
| Nhlrc4 621239          | -2.5 | 0.170446566 | 1 | #DIV/0! |
| Cml3 93674             | -2.5 | 0.170446566 | 1 | #DIV/0! |
| Slamf1 27218           | -2.5 | 0.170446566 | 1 | #DIV/0! |
| D3Bwg0562e 229791      | -2.5 | 0.170446566 | 1 | #DIV/0! |
| Nlrc3 268857           | -2.5 | 0.170446566 | 1 | #DIV/0! |
| Gpr44 14764            | -2.5 | 0.170446566 | 1 | #DIV/0! |
| Gm973 381260           | -2.5 | 0.170446566 | 1 | #DIV/0! |
| Cd101 630146           | -2.5 | 0.170446566 | 1 | #DIV/0! |
| Scg2 20254             | -2.5 | 0.170446566 | 1 | #DIV/0! |
| Grifin 77998           | -2.5 | 0.170446566 | 1 | #DIV/0! |
| Ly6i 57248             | -2.5 | 0.170446566 | 1 | #DIV/0! |
| Cdh16 12556            | -2.5 | 0.170446566 | 1 | #DIV/0! |
| Tmem52 69671           | -2.5 | 0.170446566 | 1 | #DIV/0! |
| Trem1 58217            | -2.5 | 0.170446566 | 1 | #DIV/0! |
| Zim1 22776             | -2.5 | 0.170446566 | 1 | #DIV/0! |
| Clec2i 93675           | -2.5 | 0.170446566 | 1 | #DIV/0! |
| Abca15 320631          | -2.5 | 0.170446566 | 1 | #DIV/0! |

|                     |              |             |              |             |
|---------------------|--------------|-------------|--------------|-------------|
| Cd164l2 69655       | -2.5         | 0.170446566 | 1            | #DIV/0!     |
| Mybl1 17864         | -2.5         | 0.170446566 | 1            | #DIV/0!     |
| Trpv3 246788        | -2.5         | 0.170446566 | 1            | #DIV/0!     |
| Rnase13 497071      | -2.5         | 0.170446566 | 1            | #DIV/0!     |
| Efna3 13638         | -2.5         | 0.170446566 | 1            | #DIV/0!     |
| Zfp541 666528       | -2.5         | 0.170446566 | 1            | #DIV/0!     |
| Itgb2 16415         | -2.5         | 0.170446566 | 1            | #DIV/0!     |
| Raver2 242570       | -2.5         | 0.170446566 | 1            | #DIV/0!     |
| Efcab9 69306        | -2.5         | 0.170446566 | 1            | #DIV/0!     |
| I15ra 16192         | -2.5         | 0.170446566 | 1            | #DIV/0!     |
| S1fn9 237886        | -2.5         | 0.170446566 | 1            | #DIV/0!     |
| Spin4 270624        | -2.5         | 0.170446566 | 1            | #DIV/0!     |
| Gm8234 666680       | -2.5         | 0.170446566 | 1            | #DIV/0!     |
| Cecr6 94047         | -2.5         | 0.170446566 | 1            | #DIV/0!     |
| Egfem1 75740        | -2.502443493 | 0.131364174 | -4.308514044 | 0.089804908 |
| Notch3 18131        | -2.505776625 | 0.09049602  | -2.24281773  | 0.100958579 |
| 6030408B16Rik 77717 | -2.516833333 | 0.170446566 | 1            | #DIV/0!     |
| Gm12185 620913      | -2.516833333 | 0.170446566 | 1            | #DIV/0!     |
| Gjb6 14623          | -2.516833333 | 0.170446566 | 1            | #DIV/0!     |
| Rbm24 666794        | -2.516833333 | 0.170446566 | 1            | #DIV/0!     |
| Gm14047 329514      | -2.516833333 | 0.170446566 | 1            | #DIV/0!     |
| Pkdrej 18766        | -2.516833333 | 0.170446566 | 1            | #DIV/0!     |
| Smtnl1 68678        | -2.516833333 | 0.170446566 | 1            | #DIV/0!     |
| Myoz2 59006         | -2.516833333 | 0.170446566 | 1            | #DIV/0!     |
| Mas1 17171          | -2.516833333 | 0.170446566 | 1            | #DIV/0!     |
| Cngb3 30952         | -2.516833333 | 0.170446566 | 1            | #DIV/0!     |
| Trim6 94088         | -2.516833333 | 0.170446566 | 1            | #DIV/0!     |
| Nobox 18291         | -2.516833333 | 0.170446566 | 1            | #DIV/0!     |
| Nos2 18126          | -2.516833333 | 0.170446566 | 1            | #DIV/0!     |
| Slc38a11 320106     | -2.516833333 | 0.170446566 | 1            | #DIV/0!     |
| Pla2g4c 232889      | -2.516833333 | 0.170446566 | 1            | #DIV/0!     |
| Gm7325 653016       | -2.516833333 | 0.170446566 | 1            | #DIV/0!     |
| Pcdhb15 93886       | -2.516833333 | 0.170446566 | 1            | #DIV/0!     |
| Ccr10 12777         | -2.516833333 | 0.170446566 | 1            | #DIV/0!     |
| Zfp114 232966       | -2.516833333 | 0.170446566 | 1            | #DIV/0!     |
| Shd 20420           | -2.516833333 | 0.170446566 | 1            | #DIV/0!     |
| Vaultrc5 378472     | -2.516833333 | 0.170446566 | 1            | #DIV/0!     |
| Dusp26 66959        | -2.516833333 | 0.170446566 | 1            | #DIV/0!     |
| Gm11978 100041311   | -2.516833333 | 0.170446566 | 1            | #DIV/0!     |
| Klhl29 208439       | -2.516833333 | 0.170446566 | 1            | #DIV/0!     |
| Clspn 269582        | -2.516833333 | 0.170446566 | 1            | #DIV/0!     |
| Kcnq2 16536         | -2.516833333 | 0.170446566 | 1            | #DIV/0!     |
| G6pd2 14380         | -2.516833333 | 0.170446566 | 1            | #DIV/0!     |
| D1Pas1 110957       | -2.516833333 | 0.170446566 | 1            | #DIV/0!     |
| R3hdml 100043899    | -2.516833333 | 0.170446566 | 1            | #DIV/0!     |
| Sftpc 20389         | -2.516833333 | 0.170446566 | 1            | #DIV/0!     |
| Galr3 14429         | -2.516833333 | 0.170446566 | 1            | #DIV/0!     |
| Bend6 320705        | -2.516833333 | 0.170446566 | 1            | #DIV/0!     |
| 40979 211147        | -2.516833333 | 0.170446566 | 1            | #DIV/0!     |
| Rasef 242505        | -2.516833333 | 0.170446566 | 1            | #DIV/0!     |
| Gm5151 381582       | -2.516833333 | 0.170446566 | 1            | #DIV/0!     |
| Gm5544 433632       | -2.516833333 | 0.170446566 | 1            | #DIV/0!     |
| Lrrc4b 272381       | -2.516833333 | 0.170446566 | 1            | #DIV/0!     |

|                      |              |             |              |             |
|----------------------|--------------|-------------|--------------|-------------|
| 2010002M12Rik 112419 | -2.516833333 | 0.170446566 | 1            | #DIV/0!     |
| Zfp599 235048        | -2.516833333 | 0.170446566 | 1            | #DIV/0!     |
| Trim31 224762        | -2.516833333 | 0.170446566 | 1            | #DIV/0!     |
| Kcnc4 99738          | -2.516833333 | 0.170446566 | 1            | #DIV/0!     |
| Kcnv2 240595         | -2.516833333 | 0.170446566 | 1            | #DIV/0!     |
| Trim60 234329        | -2.516833333 | 0.170446566 | 1            | #DIV/0!     |
| 9130230L23Rik 231253 | -2.516833333 | 0.170446566 | 1            | #DIV/0!     |
| Macc1 238455         | -2.516833333 | 0.170446566 | 1            | #DIV/0!     |
| Zfp934 77117         | -2.516833333 | 0.170446566 | 1            | #DIV/0!     |
| Kcnj13 100040591     | -2.516833333 | 0.170446566 | 1            | #DIV/0!     |
| Kcnma1 16531         | -2.516833333 | 0.170446566 | 1            | #DIV/0!     |
| Olfr1442 258692      | -2.516833333 | 0.170446566 | 1            | #DIV/0!     |
| Kif4 16571           | -2.516833333 | 0.170446566 | 1            | #DIV/0!     |
| Vil1 22349           | -2.516833333 | 0.170446566 | 1            | #DIV/0!     |
| Gm11110 100169874    | -2.516833333 | 0.170446566 | 1            | #DIV/0!     |
| 1700025E21Rik 75647  | -2.516833333 | 0.170446566 | 1            | #DIV/0!     |
| Ptx3 19288           | -2.516833333 | 0.170446566 | 1            | #DIV/0!     |
| Samd3 268288         | -2.516833333 | 0.170446566 | 1            | #DIV/0!     |
| Npas1 18142          | -2.516833333 | 0.170446566 | 1            | #DIV/0!     |
| Gm600 239151         | -2.516833333 | 0.170446566 | 1            | #DIV/0!     |
| Serpinb12 71869      | -2.516833333 | 0.170446566 | 1            | #DIV/0!     |
| Kcnk2 16526          | -2.516833333 | 0.170446566 | 1            | #DIV/0!     |
| B3gnt7 227327        | -2.516833333 | 0.170446566 | 1            | #DIV/0!     |
| Gucy2g 73707         | -2.516833333 | 0.170446566 | 1            | #DIV/0!     |
| Gxylt2 232313        | -2.516833333 | 0.170446566 | 1            | #DIV/0!     |
| Rgr 57811            | -2.516833333 | 0.170446566 | 1            | #DIV/0!     |
| Murc 68016           | -2.516833333 | 0.170446566 | 1            | #DIV/0!     |
| Hist1h1t 107970      | -2.516833333 | 0.170446566 | 1            | #DIV/0!     |
| Prdm5 70779          | -2.516833333 | 0.170446566 | 1            | #DIV/0!     |
| Cnrip1 380686        | -2.527181018 | 0.03696948  | -2.124495507 | 0.07625478  |
| Gbp10 626578         | -2.528836719 | 0.03578146  | -3.909115828 | 0.011583368 |
| Slc15a5 277898       | -2.529380465 | 0.15994295  | -5.725       | 0.078582895 |
| Lamc2 16782          | -2.531218987 | 0.137940916 | -2.539690909 | 0.13105537  |
| Fancg 60534          | -2.531836058 | 0.008496618 | -2.531836058 | 0.008496618 |
| Pcdhgb6 93703        | -2.536217719 | 0.210730115 | -5.83124     | 0.173296754 |
| Myst4 54169          | -2.536781208 | 0.078102959 | -2.016032707 | 0.022410628 |
| Sucnr1 84112         | -2.539619336 | 0.00095107  | -2.761010386 | 0.000216073 |
| G530011O06Rik 654820 | -2.542815371 | 0.047943582 | -2.542815371 | 0.047943582 |
| Mfap1b 100034361     | -2.543796463 | 0.006015395 | -2.292727349 | 0.012750733 |
| Bsn 12217            | -2.545087754 | 0.126459335 | -10.12431667 | 0.037434332 |
| Upk3b 100647         | -2.545087754 | 0.126459335 | -10.12431667 | 0.037434332 |
| 0610008F07Rik 68314  | -2.546862257 | 0.00020714  | -2.958138477 | 3.31062E-05 |
| Xirp1 22437          | -2.546865962 | 0.158109741 | -12.47548333 | 0.059683025 |
| Pcp2 18545           | -2.55        | 0.170446566 | 1            | #DIV/0!     |
| Pdzd9 67983          | -2.5505      | 0.170446566 | 1            | #DIV/0!     |
| Mpp7 75739           | -2.553549245 | 0.046124068 | -3.045861348 | 0.036328653 |
| Hectd2 226098        | -2.554213629 | 0.08844341  | -4.866235003 | 0.025395598 |
| 6430550D23Rik 320095 | -2.554728317 | 0.230351658 | -2.8202      | 0.173296754 |
| Zfp280d 235469       | -2.558460373 | 0.037356945 | -2.558460373 | 0.037356945 |
| Rgn 19733            | -2.560471537 | 0.001508836 | -2.42152425  | 0.000426909 |
| Phf21b 271305        | -2.561926717 | 0.096005858 | -2.561926717 | 0.096005858 |
| Cldn6 54419          | -2.565907029 | 0.081574194 | -2.565907029 | 0.081574194 |
| Sez6l2 233878        | -2.567250327 | 0.091557526 | -17.42063333 | 0.005587537 |

|                      |              |             |              |             |
|----------------------|--------------|-------------|--------------|-------------|
| 1700096K18Rik 73571  | -2.568770183 | 0.010680099 | -2.568770183 | 0.010680099 |
| Per3 18628           | -2.570449129 | 0.038249521 | -2.570449129 | 0.038249521 |
| Tlr9 81897           | -2.571428571 | 0.257082261 | 1            | #DIV/0!     |
| Gm1943 384864        | -2.576055411 | 0.025693353 | -2.923340273 | 0.013602722 |
| 9030619P08Rik 105892 | -2.577277635 | 0.002598479 | -3.119355837 | 0.001854358 |
| Prdm1 12142          | -2.577793333 | 0.112456322 | -9.46676     | 0.027509545 |
| Bcl2a1d 12047        | -2.587841208 | 0.248181938 | 1            | #DIV/0!     |
| 5730507C01Rik 236366 | -2.588996099 | 0.151556385 | -6.10878     | 0.08277987  |
| Pole2 18974          | -2.591485714 | 0.20181887  | -2.8202      | 0.173296754 |
| Esco1 77805          | -2.593247862 | 0.057127015 | -4.631172579 | 0.024524315 |
| Efnb2 13642          | -2.594310543 | 0.061594535 | -2.594310543 | 0.061594535 |
| Sema5b 20357         | -2.597906637 | 0.004364805 | -1.879038695 | 0.008105304 |
| Cyfp2 76884          | -2.608781903 | 0.014882919 | -2.608781903 | 0.014882919 |
| Pdk3 236900          | -2.614511541 | 0.056927323 | -12.28058    | 2.26551E-05 |
| Zfp37 22696          | -2.618173373 | 0.103527824 | -1.737055864 | 0.216907909 |
| Emr4 52614           | -2.618296995 | 0.05105169  | -3.906689157 | 0.015112091 |
| A230056P14Rik 320845 | -2.618363103 | 0.058661092 | -2.618363103 | 0.058661092 |
| Eya2 14049           | -2.619116051 | 0.143606318 | -6.6202      | 0.087728953 |
| B230206H07Rik 320871 | -2.621003302 | 0.064746709 | -1.831394606 | 0.114357007 |
| Zfp354b 27274        | -2.625658233 | 0.026654261 | -2.059120485 | 0.038400059 |
| 2010110P09Rik 70261  | -2.627566667 | 0.152504417 | -7.7654      | 0.073181307 |
| Samd10 229011        | -2.635895248 | 0.013629555 | -4.233935731 | 0.002958045 |
| Lama4 16775          | -2.636537198 | 0.045468671 | -2.636537198 | 0.045468671 |
| Cd46 17221           | -2.638222857 | 0.112593519 | -7.694816667 | 0.043805315 |
| Rap1gap2 380711      | -2.639155458 | 0.061627826 | -1.925207129 | 0.119072822 |
| Cep192 70799         | -2.640479326 | 0.117410165 | -10.05895    | 0.03738237  |
| Bcl11a 14025         | -2.641188571 | 0.113022404 | -7.703466667 | 0.044331703 |
| Itga6 16403          | -2.642440423 | 0.122313867 | -5.858383838 | 0.067890355 |
| Msh4 55993           | -2.643994286 | 0.111962198 | -7.71165     | 0.043574427 |
| Rnf208 68846         | -2.650796667 | 0.167585833 | -6.38098     | 0.020002315 |
| Ribc1 66611          | -2.650977817 | 0.00080618  | -2.387067591 | 0.000789877 |
| Utp14b 195434        | -2.655639413 | 0.019365364 | -5.246993939 | 0.000559844 |
| Tmem67 329795        | -2.655715333 | 0.008034698 | -2.655715333 | 0.008034698 |
| Trim35 66854         | -2.660153733 | 0.0003041   | -2.192286472 | 0.000468306 |
| Rgs9 19739           | -2.661868719 | 0.028824897 | -2.661868719 | 0.028824897 |
| Egf 13645            | -2.662008741 | 0.079963396 | -10.14096667 | 0.012545915 |
| Plk4 20873           | -2.662008741 | 0.079963396 | -10.14096667 | 0.012545915 |
| Cog5 238123          | -2.665294745 | 0.053395091 | -3.718251689 | 0.020983218 |
| Rdh19 216453         | -2.666666667 | 0.170446566 | 1            | #DIV/0!     |
| Sync 68828           | -2.66835     | 0.170446566 | 1            | #DIV/0!     |
| Abca4 11304          | -2.670588132 | 0.078976029 | -10.17365    | 0.012340756 |
| Chrd 12667           | -2.678960877 | 2.93338E-05 | -2.770812985 | 1.31945E-05 |
| Ifit1 15957          | -2.680997029 | 0.010865034 | -2.19230787  | 0.009733054 |
| N4bp2 333789         | -2.687976019 | 0.115153677 | -3.09281768  | 0.040766669 |
| Nfkbiz 80859         | -2.692271913 | 0.052923582 | -2.692271913 | 0.052923582 |
| Kctd12b 207474       | -2.698586495 | 0.029741639 | -4.127846389 | 0.010766957 |
| I17re 57890          | -2.712120312 | 0.121612504 | -2.752539394 | 0.103543379 |
| Ildr1 106347         | -2.712537773 | 0.120548221 | -9.57578     | 0.028800441 |
| Syt3 20981           | -2.714306666 | 0.011498167 | -2.714306666 | 0.011498167 |
| BC021767 545551      | -2.714478119 | 0.131854361 | -7.47616     | 0.020098075 |
| Al662270 100043636   | -2.724556519 | 0.051482869 | -1.930621719 | 0.077234095 |
| C230091D08Rik 330544 | -2.72695547  | 0.067245687 | -1.612892807 | 0.195406671 |
| Eci3 69123           | -2.728294341 | 0.029186277 | -3.248451516 | 0.004742063 |

|                      |              |             |              |             |
|----------------------|--------------|-------------|--------------|-------------|
| Gm4925 237433        | -2.730165714 | 0.065356157 | -7.962983333 | 0.01361011  |
| Trim56 384309        | -2.734803505 | 0.11055963  | -8.345151594 | 4.25795E-05 |
| Cd300e 217306        | -2.740450435 | 0.009947877 | -2.306316875 | 0.022039297 |
| Zbtb1 268564         | -2.748500538 | 0.092956891 | -7.166811181 | 0.037803466 |
| Aqp8 11833           | -2.752256813 | 0.002192635 | -3.423380903 | 0.001474361 |
| Hist1h2bp 319188     | -2.752533333 | 0.170446566 | 1            | #DIV/0!     |
| Robo3 19649          | -2.753859245 | 0.11953938  | -1.515644735 | 0.247307335 |
| Mob1a 232157         | -2.757831791 | 0.131852354 | -2.709600084 | 0.143484141 |
| Evpl 14027           | -2.7672069   | 0.038537203 | -2.7672069   | 0.038537203 |
| Doc2g 60425          | -2.771116357 | 0.000783402 | -2.771116357 | 0.000783402 |
| Fgd4 224014          | -2.772389393 | 0.017962647 | -3.308384008 | 0.001167527 |
| Gbp6 100702          | -2.78008262  | 0.002422072 | -2.78008262  | 0.002422072 |
| 4930473A06Rik 320226 | -2.780558644 | 0.007043617 | -2.700120714 | 0.001296318 |
| Agbl3 76223          | -2.781080499 | 0.039725995 | -17.77034    | 4.84841E-08 |
| Rhof 23912           | -2.78941923  | 0.061747114 | -3.21443927  | 0.045393606 |
| Gpr97 54672          | -2.791210316 | 0.000218643 | -3.055010715 | 9.38918E-06 |
| 4930563E22Rik 75304  | -2.793805714 | 0.197880848 | -2.76078     | 0.173296754 |
| Acn9 71238           | -2.7978382   | 0.095410268 | -1.744950503 | 0.190023771 |
| Bbs7 71492           | -2.801981742 | 0.019135737 | -5.122379282 | 0.000222342 |
| Tssk1 22114          | -2.802184904 | 0.05342064  | -5.553198181 | 0.022031674 |
| Hey2 15214           | -2.805011429 | 0.196537171 | -2.8         | 0.173296754 |
| Mmgt2 216829         | -2.822192114 | 0.07848064  | -5.828282828 | 0.040150201 |
| Tnnt2 21956          | -2.822249642 | 0.06595673  | -1.644041308 | 0.191781906 |
| Panx1 55991          | -2.823281478 | 0.099024577 | -7.5948      | 0.026105266 |
| Sorcs2 81840         | -2.825645714 | 0.064479698 | -8.241466667 | 0.016004313 |
| Phactr1 218194       | -2.830405271 | 0.09861442  | -2.830405271 | 0.09861442  |
| 3110001I22Rik 66598  | -2.836736806 | 0.072921648 | -3.548325926 | 0.064555885 |
| Zfp715 69930         | -2.844455721 | 0.034220375 | -6.719374673 | 0.005872542 |
| Nap1l3 54561         | -2.849885714 | 0.167543931 | -3.9746      | 0.173296754 |
| Fndc5 384061         | -2.856920802 | 0.137490632 | -6.6202      | 0.087728953 |
| Ccdc62 208908        | -2.861298497 | 0.000884845 | -2.861298497 | 0.000884845 |
| Tnfsf13 69583        | -2.862369223 | 0.006317543 | -3.252363091 | 0.001005421 |
| 1700009P17Rik 75472  | -2.865449172 | 0.013811933 | -2.787485769 | 0.012911592 |
| Fitm1 68680          | -2.866000982 | 0.000352809 | -2.866000982 | 0.000352809 |
| Synm 233335          | -2.86694191  | 0.162020882 | -4.72156     | 0.173296754 |
| Ovol2 107586         | -2.8672      | 0.167172108 | -3.9746      | 0.173296754 |
| Snn 20621            | -2.8674335   | 0.035011336 | -2.217731256 | 0.062819965 |
| Peli3 240518         | -2.878731844 | 0.049803609 | -3.793878788 | 0.02520964  |
| Zfp647 239546        | -2.882158031 | 0.123717515 | -15.37578    | 0.009220078 |
| Adam1a 280668        | -2.887895458 | 0.115440739 | -7.725       | 0.072984714 |
| Etv4 18612           | -2.890799311 | 0.143439081 | -4.56078     | 0.070574133 |
| Scgb1c1 338417       | -2.913811407 | 0.164828986 | -6.60118     | 0.089542423 |
| Gm7120 633640        | -2.919213471 | 0.089373788 | -2.512088614 | 0.062882096 |
| Bcl9 77578           | -2.935144932 | 0.106440103 | -5.148996941 | 0.079002833 |
| Pmel 20431           | -2.941622706 | 0.04032891  | -3.935468495 | 0.028426471 |
| Esr1 13982           | -2.94256999  | 0.069904551 | -2.463921898 | 0.109253095 |
| Apc2 23805           | -2.95959     | 0.083999635 | -10.74       | 0.021597467 |
| Scd1 20249           | -2.960754856 | 0.01154218  | -2.396171756 | 0.011909639 |
| Gm6787 627782        | -2.973822857 | 0.087331737 | -8.67365     | 0.037277465 |
| Alpk1 71481          | -3.002433267 | 0.104420224 | -3.221509091 | 0.127882662 |
| Stambpl1 76630       | -3.003644019 | 0.014521658 | -3.584015173 | 0.000861442 |
| Card11 108723        | -3.011931429 | 0.097726719 | -8.7848      | 0.047326766 |
| Emid1 140703         | -3.015605654 | 0.107626729 | -7.725       | 0.072984714 |

|                      |              |             |              |             |
|----------------------|--------------|-------------|--------------|-------------|
| Zfp960 449000        | -3.021066127 | 0.092970709 | -6.516672795 | 0.056561398 |
| Klhdc7a 242721       | -3.023212152 | 0.006046629 | -3.378725066 | 0.003784669 |
| Ces4a 234677         | -3.02339     | 0.084122769 | -15.11695    | 0.022871287 |
| Thbs3 21827          | -3.024368748 | 0.007240765 | -5.539806891 | 0.000908083 |
| Bhlhb9 70237         | -3.041049426 | 0.061088595 | -2.097710659 | 0.110687616 |
| Ppbp 57349           | -3.042479648 | 0.101056723 | -7.50598     | 0.025961531 |
| Lat2 56743           | -3.053568818 | 0.016409234 | -4.702485691 | 0.002184739 |
| Relt 320100          | -3.05821102  | 0.029864917 | -3.05821102  | 0.029864917 |
| Stard4 170459        | -3.088166692 | 0.060434643 | -2.746903283 | 0.090545155 |
| Haus6 230376         | -3.088794286 | 0.13254585  | -4.56078     | 0.070574133 |
| Tnfrsf13c 72049      | -3.090178564 | 0.04395869  | -2.317833786 | 0.082974413 |
| Espl1 105988         | -3.09176     | 0.084088104 | -9.017633333 | 0.038462883 |
| Pbx4 80720           | -3.10144075  | 0.142255205 | -4.58098     | 0.070596339 |
| Scd2 20250           | -3.111908385 | 0.047036312 | -2.190211442 | 0.072259439 |
| Zfp951 626391        | -3.113880987 | 0.033701259 | -14.66436    | 7.47236E-05 |
| D830015G02Rik 791403 | -3.114033333 | 0.170446566 | 1            | #DIV/0!     |
| Tmem71 213068        | -3.114286631 | 0.085842262 | -9.705466667 | 0.038460173 |
| Spred3 101809        | -3.115729235 | 0.045748446 | -3.837684848 | 0.005488291 |
| Pabpc4l 241989       | -3.127549656 | 0.085108819 | -9.7468      | 0.038269251 |
| AU041133 216177      | -3.138189786 | 0.125558494 | -6.8996      | 0.070566833 |
| Smpd13b 100340       | -3.139031799 | 0.156389575 | -4.72156     | 0.173296754 |
| Rdh18-ps 380674      | -3.147265034 | 0.082845795 | -10.21234137 | 0.035831364 |
| Prph 19132           | -3.155474286 | 0.049773787 | -9.203466667 | 0.015035698 |
| Gpr137c 70713        | -3.155904696 | 0.122673308 | -5.813836158 | 0.097228399 |
| Cyp2g1 13108         | -3.158479679 | 0.013364058 | -9.593463858 | 0.000281329 |
| Mup14 100039116      | -3.158520742 | 0.07536837  | -6.071364267 | 0.049963663 |
| Limch1 77569         | -3.159327436 | 0.084145838 | -9.845833333 | 0.038439314 |
| Tmem194 210035       | -3.159399096 | 0.139696169 | -2.513733224 | 0.155741267 |
| Palld 72333          | -3.169824869 | 0.053193431 | -2.248474625 | 0.096856049 |
| Ppp1r3f 54646        | -3.173861127 | 0.100273722 | -12.62556667 | 0.045659527 |
| Zkscan4 544922       | -3.179381047 | 0.043384447 | -31.68491667 | 0.00178628  |
| Sgsm1 52850          | -3.192394279 | 0.0219653   | -6.44726988  | 0.001026835 |
| Pilrb2 545812        | -3.195205632 | 0.001615307 | -3.195205632 | 0.001615307 |
| Zfhx2as 432855       | -3.20175     | 0.170446566 | 1            | #DIV/0!     |
| Zfp101 22643         | -3.216769744 | 0.086978391 | -5.38528942  | 0.0695168   |
| Cdca2 108912         | -3.223822857 | 0.079082075 | -9.402816667 | 0.038132641 |
| Tmprss4 214523       | -3.227712235 | 0.080462464 | -10.05895    | 0.03738237  |
| Arhgap44 216831      | -3.231255985 | 0.055529045 | -3.231255985 | 0.055529045 |
| Gprasp1 67298        | -3.23840862  | 0.016158771 | -5.627286767 | 0.007118792 |
| Ap1s2 108012         | -3.254033063 | 0.035159938 | -5.602542951 | 0.021803184 |
| Ldb3 24131           | -3.254088541 | 0.107719325 | -6.10878     | 0.08277987  |
| Fzd2 57265           | -3.266596559 | 0.143453667 | -6.06956     | 0.083596805 |
| Sc4mol 66234         | -3.270762326 | 0.016188812 | -2.456795672 | 0.005770179 |
| Car1 12346           | -3.273271337 | 0.012776123 | -2.561359987 | 0.009531733 |
| Icos 54167           | -3.292534398 | 0.03510613  | -6.031012176 | 0.020023345 |
| Ankle1 234396        | -3.293091577 | 0.037546818 | -4.970946855 | 0.017686137 |
| Idi1 319554          | -3.310759015 | 0.040798916 | -2.456391624 | 0.00829248  |
| 2810432L12Rik 67063  | -3.316165236 | 0.087242887 | -11.48696    | 0.021283245 |
| Lrrc50 68270         | -3.333333333 | 0.170446566 | 1            | #DIV/0!     |
| Elf3 13710           | -3.33584469  | 0.018662417 | -5.242375103 | 0.003093408 |
| Sectm1a 209588       | -3.339131429 | 0.076030926 | -9.739133333 | 0.038536342 |
| Col4a4 12829         | -3.342682012 | 0.095567558 | -13.29713333 | 0.046995664 |
| Esrrb 26380          | -3.348171299 | 0.042844032 | -4.626419566 | 0.038446498 |

|                         |              |             |              |             |
|-------------------------|--------------|-------------|--------------|-------------|
| Kitl 17311              | -3.352965714 | 0.105022556 | -5.73538     | 0.079831528 |
| Fam132b 227358          | -3.359366667 | 0.170446566 | 1            | #DIV/0!     |
| Gfra2 14586             | -3.362799178 | 0.002617829 | -3.714502745 | 0.000361244 |
| Tmem14a 75712           | -3.378960809 | 0.000759383 | -3.761368131 | 7.07692E-05 |
| Aim2 383619             | -3.390688766 | 0.013050217 | -4.039360589 | 0.001076418 |
| Lcn2 16819              | -3.412952112 | 0.026462407 | -2.215178381 | 0.039449461 |
| Npff 54615              | -3.424629252 | 0.06102326  | -8.459633333 | 0.033016045 |
| Zfp398 272347           | -3.426304649 | 0.019447565 | -2.685832395 | 0.029152791 |
| Pde6c 110855            | -3.42915974  | 0.006605334 | -3.42915974  | 0.006605334 |
| D17H6S56E-3 27762       | -3.430855183 | 0.06333734  | -9.33468     | 0.026770599 |
| Pde1c 18575             | -3.4375      | 0.170446566 | 1            | #DIV/0!     |
| Gm13034 627585          | -3.4375      | 0.170446566 | 1            | #DIV/0!     |
| Nxn12 75124             | -3.4375      | 0.170446566 | 1            | #DIV/0!     |
| Zbtb8b 215627           | -3.4375      | 0.170446566 | 1            | #DIV/0!     |
| 2700099C18Rik 77022     | -3.4375      | 0.170446566 | 1            | #DIV/0!     |
| E330034G19Rik 105418    | -3.4375      | 0.170446566 | 1            | #DIV/0!     |
| Cyct 13067              | -3.4375      | 0.170446566 | 1            | #DIV/0!     |
| Olf1034 258216          | -3.4375      | 0.170446566 | 1            | #DIV/0!     |
| Cckbr 12426             | -3.4375      | 0.170446566 | 1            | #DIV/0!     |
| Tbrg3 21378             | -3.4375      | 0.170446566 | 1            | #DIV/0!     |
| Pnpla1 433091           | -3.4375      | 0.170446566 | 1            | #DIV/0!     |
| 1500009C09Rik 76505     | -3.4375      | 0.170446566 | 1            | #DIV/0!     |
| A630075F10Rik 100043910 | -3.4375      | 0.170446566 | 1            | #DIV/0!     |
| Trim42 78911            | -3.4375      | 0.170446566 | 1            | #DIV/0!     |
| Zfp442 668923           | -3.4375      | 0.170446566 | 1            | #DIV/0!     |
| Miat 330166             | -3.4375      | 0.170446566 | 1            | #DIV/0!     |
| Pspn 19197              | -3.4375      | 0.170446566 | 1            | #DIV/0!     |
| Trpc1 22063             | -3.4375      | 0.170446566 | 1            | #DIV/0!     |
| Akr1c21 77337           | -3.4375      | 0.170446566 | 1            | #DIV/0!     |
| Nkx1-2 20231            | -3.4375      | 0.170446566 | 1            | #DIV/0!     |
| Tex14 83560             | -3.4375      | 0.170446566 | 1            | #DIV/0!     |
| Pcdh8 18530             | -3.4375      | 0.170446566 | 1            | #DIV/0!     |
| Klra5 16636             | -3.4375      | 0.170446566 | 1            | #DIV/0!     |
| Chst4 26887             | -3.4375      | 0.170446566 | 1            | #DIV/0!     |
| Nov 18133               | -3.4375      | 0.170446566 | 1            | #DIV/0!     |
| 4930404I05Rik 67394     | -3.4375      | 0.170446566 | 1            | #DIV/0!     |
| Lrrc63 70859            | -3.4375      | 0.170446566 | 1            | #DIV/0!     |
| Pcnx12 270109           | -3.4375      | 0.170446566 | 1            | #DIV/0!     |
| Prdm6 225518            | -3.4375      | 0.170446566 | 1            | #DIV/0!     |
| Prr19 623131            | -3.4375      | 0.170446566 | 1            | #DIV/0!     |
| Sirpb1b 668101          | -3.4375      | 0.170446566 | 1            | #DIV/0!     |
| Csmd3 239420            | -3.4375      | 0.170446566 | 1            | #DIV/0!     |
| Hoxb1 15407             | -3.4375      | 0.170446566 | 1            | #DIV/0!     |
| F930015N05Rik 654805    | -3.4375      | 0.170446566 | 1            | #DIV/0!     |
| Wdr72 546144            | -3.4375      | 0.170446566 | 1            | #DIV/0!     |
| Kif17 16559             | -3.4375      | 0.170446566 | 1            | #DIV/0!     |
| Gm15348 100038554       | -3.4375      | 0.170446566 | 1            | #DIV/0!     |
| Tox3 244579             | -3.4375      | 0.170446566 | 1            | #DIV/0!     |
| Eif5a2 208691           | -3.4375      | 0.170446566 | 1            | #DIV/0!     |
| Mcf2 109904             | -3.4375      | 0.170446566 | 1            | #DIV/0!     |
| BC094916 545384         | -3.4375      | 0.170446566 | 1            | #DIV/0!     |
| Mtap2 17756             | -3.4375      | 0.170446566 | 1            | #DIV/0!     |
| Tekt2 24084             | -3.4375      | 0.170446566 | 1            | #DIV/0!     |



|                         |              |             |              |             |
|-------------------------|--------------|-------------|--------------|-------------|
| Drd5 13492              | -3.4375      | 0.170446566 | 1            | #DIV/0!     |
| A930017M01Rik 239410    | -3.4375      | 0.170446566 | 1            | #DIV/0!     |
| Olf1443 258693          | -3.4375      | 0.170446566 | 1            | #DIV/0!     |
| Clnk 27278              | -3.4375      | 0.170446566 | 1            | #DIV/0!     |
| Pqlc3 217430            | -3.4375      | 0.170446566 | 1            | #DIV/0!     |
| Ccdc46 76380            | -3.4375      | 0.170446566 | 1            | #DIV/0!     |
| Usp29 57775             | -3.4375      | 0.170446566 | 1            | #DIV/0!     |
| Gm5779 544707           | -3.4375      | 0.170446566 | 1            | #DIV/0!     |
| Rgs17 56533             | -3.4375      | 0.170446566 | 1            | #DIV/0!     |
| Duox2 214593            | -3.4375      | 0.170446566 | 1            | #DIV/0!     |
| Erb4 13869              | -3.4375      | 0.170446566 | 1            | #DIV/0!     |
| Lrtm2 211187            | -3.4375      | 0.170446566 | 1            | #DIV/0!     |
| Timm8a2 223262          | -3.4375      | 0.170446566 | 1            | #DIV/0!     |
| Rem2 140743             | -3.4375      | 0.170446566 | 1            | #DIV/0!     |
| Tekt5 70426             | -3.4375      | 0.170446566 | 1            | #DIV/0!     |
| Mylk4 238564            | -3.4375      | 0.170446566 | 1            | #DIV/0!     |
| Snora64 104366          | -3.4375      | 0.170446566 | 1            | #DIV/0!     |
| Ryr3 20192              | -3.4375      | 0.170446566 | 1            | #DIV/0!     |
| Olf92 258448            | -3.4375      | 0.170446566 | 1            | #DIV/0!     |
| 3830408C21Rik 100040322 | -3.4375      | 0.170446566 | 1            | #DIV/0!     |
| Ncan 13004              | -3.4375      | 0.170446566 | 1            | #DIV/0!     |
| Rtn4r 65079             | -3.4375      | 0.170446566 | 1            | #DIV/0!     |
| Gpr88 64378             | -3.4375      | 0.170446566 | 1            | #DIV/0!     |
| Xlr4b 27083             | -3.4375      | 0.170446566 | 1            | #DIV/0!     |
| Meis3 17537             | -3.437607249 | 0.031473106 | -21.69192    | 0.000829565 |
| 9930014A18Rik 320469    | -3.439360494 | 0.033096024 | -2.632254343 | 0.061036807 |
| Zfp182 319535           | -3.46942635  | 0.012908321 | -6.453128919 | 0.005238345 |
| Fsip1 71313             | -3.478833333 | 0.170446566 | 1            | #DIV/0!     |
| Pxt1 69307              | -3.478833333 | 0.170446566 | 1            | #DIV/0!     |
| Trim63 433766           | -3.478833333 | 0.170446566 | 1            | #DIV/0!     |
| Fcamr 64435             | -3.478833333 | 0.170446566 | 1            | #DIV/0!     |
| Tcf15 21407             | -3.478833333 | 0.170446566 | 1            | #DIV/0!     |
| 4922505G16Rik 629499    | -3.478833333 | 0.170446566 | 1            | #DIV/0!     |
| Gm10190 791338          | -3.478833333 | 0.170446566 | 1            | #DIV/0!     |
| Fbn2 14119              | -3.478833333 | 0.170446566 | 1            | #DIV/0!     |
| Mir670 735259           | -3.478833333 | 0.170446566 | 1            | #DIV/0!     |
| Slc30a8 239436          | -3.478833333 | 0.170446566 | 1            | #DIV/0!     |
| Mir155 387173           | -3.478833333 | 0.170446566 | 1            | #DIV/0!     |
| Trpm1 17364             | -3.478833333 | 0.170446566 | 1            | #DIV/0!     |
| Alpk3 116904            | -3.478833333 | 0.170446566 | 1            | #DIV/0!     |
| Foxd2 17301             | -3.478833333 | 0.170446566 | 1            | #DIV/0!     |
| BC048671 243535         | -3.478833333 | 0.170446566 | 1            | #DIV/0!     |
| Neto1 246317            | -3.478833333 | 0.170446566 | 1            | #DIV/0!     |
| Tm7sf4 75766            | -3.478833333 | 0.170446566 | 1            | #DIV/0!     |
| Grk1 24013              | -3.478833333 | 0.170446566 | 1            | #DIV/0!     |
| Ptk6 20459              | -3.478833333 | 0.170446566 | 1            | #DIV/0!     |
| Ttll9 74711             | -3.478833333 | 0.170446566 | 1            | #DIV/0!     |
| Cenpe 229841            | -3.478833333 | 0.170446566 | 1            | #DIV/0!     |
| S100a14 66166           | -3.478833333 | 0.170446566 | 1            | #DIV/0!     |
| 1700019L03Rik 227736    | -3.478833333 | 0.170446566 | 1            | #DIV/0!     |
| Matn4 17183             | -3.478833333 | 0.170446566 | 1            | #DIV/0!     |
| Akap3 11642             | -3.478833333 | 0.170446566 | 1            | #DIV/0!     |
| Mgst2 211666            | -3.478833333 | 0.170446566 | 1            | #DIV/0!     |

|                      |              |             |              |             |
|----------------------|--------------|-------------|--------------|-------------|
| Six2 20472           | -3.478833333 | 0.170446566 | 1            | #DIV/0!     |
| Nrxn3 18191          | -3.478833333 | 0.170446566 | 1            | #DIV/0!     |
| Mpo 17523            | -3.478833333 | 0.170446566 | 1            | #DIV/0!     |
| Ntsr2 18217          | -3.478833333 | 0.170446566 | 1            | #DIV/0!     |
| Ulk4 209012          | -3.478833333 | 0.170446566 | 1            | #DIV/0!     |
| Mfap5 50530          | -3.478833333 | 0.170446566 | 1            | #DIV/0!     |
| Dux 664783           | -3.478833333 | 0.170446566 | 1            | #DIV/0!     |
| Cdkl1 71091          | -3.478833333 | 0.170446566 | 1            | #DIV/0!     |
| Isl2 104360          | -3.478833333 | 0.170446566 | 1            | #DIV/0!     |
| Pcdhb4 93875         | -3.478833333 | 0.170446566 | 1            | #DIV/0!     |
| Klhdc1 271005        | -3.478833333 | 0.170446566 | 1            | #DIV/0!     |
| Tcf23 69852          | -3.478833333 | 0.170446566 | 1            | #DIV/0!     |
| 4930511M06Rik 75084  | -3.478833333 | 0.170446566 | 1            | #DIV/0!     |
| Alox15 11687         | -3.478833333 | 0.170446566 | 1            | #DIV/0!     |
| Ppm1n 232941         | -3.478833333 | 0.170446566 | 1            | #DIV/0!     |
| A530099J19Rik 319293 | -3.478833333 | 0.170446566 | 1            | #DIV/0!     |
| Nt5c1b 70881         | -3.478833333 | 0.170446566 | 1            | #DIV/0!     |
| Nudt10 102954        | -3.478833333 | 0.170446566 | 1            | #DIV/0!     |
| Fgf18 14172          | -3.478833333 | 0.170446566 | 1            | #DIV/0!     |
| Pax9 18511           | -3.478833333 | 0.170446566 | 1            | #DIV/0!     |
| Gm7092 632778        | -3.478833333 | 0.170446566 | 1            | #DIV/0!     |
| Gpr55 227326         | -3.478833333 | 0.170446566 | 1            | #DIV/0!     |
| 1700066B19Rik 73449  | -3.478833333 | 0.170446566 | 1            | #DIV/0!     |
| Gm1574 380842        | -3.478833333 | 0.170446566 | 1            | #DIV/0!     |
| Wnt11 22411          | -3.478833333 | 0.170446566 | 1            | #DIV/0!     |
| Kif20b 240641        | -3.478833333 | 0.170446566 | 1            | #DIV/0!     |
| Edar 13608           | -3.478833333 | 0.170446566 | 1            | #DIV/0!     |
| Kbtbd13 74492        | -3.478833333 | 0.170446566 | 1            | #DIV/0!     |
| Nwd1 319555          | -3.478833333 | 0.170446566 | 1            | #DIV/0!     |
| Car10 72605          | -3.478833333 | 0.170446566 | 1            | #DIV/0!     |
| Tpte 234129          | -3.478833333 | 0.170446566 | 1            | #DIV/0!     |
| Ppp1r3a 140491       | -3.478833333 | 0.170446566 | 1            | #DIV/0!     |
| Polq 77782           | -3.478833333 | 0.170446566 | 1            | #DIV/0!     |
| Slc2a13 239606       | -3.478833333 | 0.170446566 | 1            | #DIV/0!     |
| Epha3 13837          | -3.478833333 | 0.170446566 | 1            | #DIV/0!     |
| Mms22l 212377        | -3.485259467 | 0.01658467  | -2.755260703 | 0.02386326  |
| Pou2af1 18985        | -3.49430375  | 0.037540757 | -7.746994949 | 0.018765086 |
| S100pbp 74648        | -3.494966667 | 0.083451178 | -11.5948     | 0.042761804 |
| Pla2g4a 18783        | -3.496528811 | 0.058200863 | -13.90913333 | 0.02136273  |
| Slc22a29 236293      | -3.515633333 | 0.170446566 | 1            | #DIV/0!     |
| Dlgap3 242667        | -3.525026931 | 0.004920397 | -6.296606061 | 0.001429184 |
| Mir1839 100316717    | -3.525982596 | 0.083332883 | -14.0263     | 0.041490024 |
| Hsd3b6 15497         | -3.541666667 | 0.170446566 | 1            | #DIV/0!     |
| Zbed6 667118         | -3.561268482 | 0.233897864 | 1            | #DIV/0!     |
| Hist1h2bb 319178     | -3.58465     | 0.170446566 | 1            | #DIV/0!     |
| Cnn1 12797           | -3.610683116 | 0.189641251 | 1.206415778  | 0.394652548 |
| Dzip1 66573          | -3.629628078 | 0.147551708 | -6.8         | 0.173296754 |
| Dnase1l2 66705       | -3.629628078 | 0.147551708 | -6.8         | 0.173296754 |
| Rnase6 78416         | -3.633518017 | 0.116351852 | -5.7452      | 0.078237796 |
| Etv5 104156          | -3.638575288 | 0.000327788 | -3.638575288 | 0.000327788 |
| Arhgap6 11856        | -3.647334106 | 0.070692703 | -2.152003708 | 0.089741351 |
| Sybu 319613          | -3.654550735 | 0.016276344 | -6.103573588 | 0.010609883 |
| Cct6b 12467          | -3.671109067 | 0.165999474 | -3.925       | 0.173296754 |

|                      |              |             |              |             |
|----------------------|--------------|-------------|--------------|-------------|
| Fbxw17 109082        | -3.675531429 | 0.014274216 | -12.66436    | 5.78335E-05 |
| Gzmb 14939           | -3.683131429 | 0.093445767 | -6.54176     | 0.086882566 |
| Robo2 268902         | -3.690363169 | 0.103598997 | -14.0585     | 0.064345641 |
| 1110012J17Rik 68617  | -3.69350062  | 0.083221725 | -3.832670381 | 0.114337623 |
| Pfn4 382562          | -3.705542857 | 0.092547859 | -6.6202      | 0.087728953 |
| Zbp1 58203           | -3.707987339 | 0.000965312 | -3.106727154 | 0.002597225 |
| Cyp1b1 13078         | -3.714117634 | 0.059519908 | -7.88976     | 0.029636667 |
| Cyp4f39 320997       | -3.714801051 | 0.100684576 | -7.92898     | 0.029263299 |
| Mmp24 17391          | -3.743383333 | 0.170446566 | 1            | #DIV/0!     |
| Ccdc96 66717         | -3.74388     | 0.033923263 | -10.91965    | 0.013608087 |
| Ppm1e 320472         | -3.757316667 | 0.170446566 | 1            | #DIV/0!     |
| Pak3 18481           | -3.757316667 | 0.170446566 | 1            | #DIV/0!     |
| Grm3 108069          | -3.757316667 | 0.170446566 | 1            | #DIV/0!     |
| Slc36a2 246049       | -3.757316667 | 0.170446566 | 1            | #DIV/0!     |
| Gm5095 328953        | -3.757316667 | 0.170446566 | 1            | #DIV/0!     |
| 1700029M20Rik 73937  | -3.757316667 | 0.170446566 | 1            | #DIV/0!     |
| Dpep3 71854          | -3.757316667 | 0.170446566 | 1            | #DIV/0!     |
| Expi 14038           | -3.757316667 | 0.170446566 | 1            | #DIV/0!     |
| Tnfrsf17 21935       | -3.757316667 | 0.170446566 | 1            | #DIV/0!     |
| Gjb3 14620           | -3.757316667 | 0.170446566 | 1            | #DIV/0!     |
| Olf1r518 258303      | -3.757316667 | 0.170446566 | 1            | #DIV/0!     |
| Fancd2 211651        | -3.757316667 | 0.170446566 | 1            | #DIV/0!     |
| A530058N18Rik 320846 | -3.757316667 | 0.170446566 | 1            | #DIV/0!     |
| Vmn1r61 636731       | -3.757316667 | 0.170446566 | 1            | #DIV/0!     |
| Tnnt3 21957          | -3.757316667 | 0.170446566 | 1            | #DIV/0!     |
| Gm3985 100042715     | -3.757316667 | 0.170446566 | 1            | #DIV/0!     |
| 4933432I09Rik 66779  | -3.757316667 | 0.170446566 | 1            | #DIV/0!     |
| B430319G15Rik 78575  | -3.757316667 | 0.170446566 | 1            | #DIV/0!     |
| Tyrp1 22178          | -3.757316667 | 0.170446566 | 1            | #DIV/0!     |
| Olf1r699 258180      | -3.757316667 | 0.170446566 | 1            | #DIV/0!     |
| Irs4 16370           | -3.757316667 | 0.170446566 | 1            | #DIV/0!     |
| Ryr1 20190           | -3.757316667 | 0.170446566 | 1            | #DIV/0!     |
| Gpr156 239845        | -3.757316667 | 0.170446566 | 1            | #DIV/0!     |
| Crb1 170788          | -3.757316667 | 0.170446566 | 1            | #DIV/0!     |
| F830045P16Rik 228592 | -3.757316667 | 0.170446566 | 1            | #DIV/0!     |
| Olf1r912 258806      | -3.757316667 | 0.170446566 | 1            | #DIV/0!     |
| Tcp10a 21460         | -3.757316667 | 0.170446566 | 1            | #DIV/0!     |
| 4933427G17Rik 74466  | -3.757316667 | 0.170446566 | 1            | #DIV/0!     |
| Olf1r114 258284      | -3.757316667 | 0.170446566 | 1            | #DIV/0!     |
| Gabrg1 14405         | -3.757316667 | 0.170446566 | 1            | #DIV/0!     |
| Tmem232 381107       | -3.757316667 | 0.170446566 | 1            | #DIV/0!     |
| Osr2 107587          | -3.757316667 | 0.170446566 | 1            | #DIV/0!     |
| Col6a6 245026        | -3.757316667 | 0.170446566 | 1            | #DIV/0!     |
| Vmn2r77 546983       | -3.757316667 | 0.170446566 | 1            | #DIV/0!     |
| Olf1r574 258357      | -3.757316667 | 0.170446566 | 1            | #DIV/0!     |
| Sncg 20618           | -3.757316667 | 0.170446566 | 1            | #DIV/0!     |
| Rtl1 353326          | -3.757316667 | 0.170446566 | 1            | #DIV/0!     |
| Ccl17 20295          | -3.757316667 | 0.170446566 | 1            | #DIV/0!     |
| Tfap2e 332937        | -3.757316667 | 0.170446566 | 1            | #DIV/0!     |
| Pax3 18505           | -3.757316667 | 0.170446566 | 1            | #DIV/0!     |
| 1700057K13Rik 73435  | -3.757316667 | 0.170446566 | 1            | #DIV/0!     |
| Celsr3 107934        | -3.757316667 | 0.170446566 | 1            | #DIV/0!     |
| Gm10825 100038752    | -3.757316667 | 0.170446566 | 1            | #DIV/0!     |

|                     |              |             |   |         |
|---------------------|--------------|-------------|---|---------|
| Cd96 84544          | -3.757316667 | 0.170446566 | 1 | #DIV/0! |
| Ppy 19064           | -3.757316667 | 0.170446566 | 1 | #DIV/0! |
| Abca12 74591        | -3.757316667 | 0.170446566 | 1 | #DIV/0! |
| Olfr763 258861      | -3.757316667 | 0.170446566 | 1 | #DIV/0! |
| Shh 20423           | -3.757316667 | 0.170446566 | 1 | #DIV/0! |
| Rasd2 75141         | -3.757316667 | 0.170446566 | 1 | #DIV/0! |
| Mcpt4 17227         | -3.757316667 | 0.170446566 | 1 | #DIV/0! |
| Il1 16156           | -3.757316667 | 0.170446566 | 1 | #DIV/0! |
| Olfr684 244187      | -3.757316667 | 0.170446566 | 1 | #DIV/0! |
| Exo1 26909          | -3.757316667 | 0.170446566 | 1 | #DIV/0! |
| 4933404M02Rik 66748 | -3.757316667 | 0.170446566 | 1 | #DIV/0! |
| Olfr353 258943      | -3.757316667 | 0.170446566 | 1 | #DIV/0! |
| Tspan1 66805        | -3.757316667 | 0.170446566 | 1 | #DIV/0! |
| Gm10125 791318      | -3.757316667 | 0.170446566 | 1 | #DIV/0! |
| BC125332 213765     | -3.757316667 | 0.170446566 | 1 | #DIV/0! |
| Radil 231858        | -3.757316667 | 0.170446566 | 1 | #DIV/0! |
| Svopl 320590        | -3.757316667 | 0.170446566 | 1 | #DIV/0! |
| Pla2g2f 26971       | -3.757316667 | 0.170446566 | 1 | #DIV/0! |
| Fam47a-ps 70864     | -3.757316667 | 0.170446566 | 1 | #DIV/0! |
| Sobp 109205         | -3.757316667 | 0.170446566 | 1 | #DIV/0! |
| Gm628 268816        | -3.757316667 | 0.170446566 | 1 | #DIV/0! |
| Apcdd1 494504       | -3.757316667 | 0.170446566 | 1 | #DIV/0! |
| Arpm1 76652         | -3.757316667 | 0.170446566 | 1 | #DIV/0! |
| Morn5 75495         | -3.757316667 | 0.170446566 | 1 | #DIV/0! |
| Ucp3 22229          | -3.757316667 | 0.170446566 | 1 | #DIV/0! |
| Ankrd34c 330998     | -3.757316667 | 0.170446566 | 1 | #DIV/0! |
| Olfr910 258807      | -3.757316667 | 0.170446566 | 1 | #DIV/0! |
| Esr2 13983          | -3.757316667 | 0.170446566 | 1 | #DIV/0! |
| Fam166b 329831      | -3.757316667 | 0.170446566 | 1 | #DIV/0! |
| Adig 246747         | -3.757316667 | 0.170446566 | 1 | #DIV/0! |
| Olfr610 259085      | -3.757316667 | 0.170446566 | 1 | #DIV/0! |
| Gm10790 100038577   | -3.757316667 | 0.170446566 | 1 | #DIV/0! |
| Syna 214292         | -3.757316667 | 0.170446566 | 1 | #DIV/0! |
| Flrt3 71436         | -3.757316667 | 0.170446566 | 1 | #DIV/0! |
| Grin2b 14812        | -3.757316667 | 0.170446566 | 1 | #DIV/0! |
| Cma1 17228          | -3.757316667 | 0.170446566 | 1 | #DIV/0! |
| Gria1 14799         | -3.757316667 | 0.170446566 | 1 | #DIV/0! |
| Aqp5 11830          | -3.757316667 | 0.170446566 | 1 | #DIV/0! |
| D7Ert715e 52480     | -3.757316667 | 0.170446566 | 1 | #DIV/0! |
| Crnn 381457         | -3.757316667 | 0.170446566 | 1 | #DIV/0! |
| Ppp1r14c 76142      | -3.757316667 | 0.170446566 | 1 | #DIV/0! |
| Olfr1506 257665     | -3.757316667 | 0.170446566 | 1 | #DIV/0! |
| Stil 20460          | -3.757316667 | 0.170446566 | 1 | #DIV/0! |
| Gm3002 100040852    | -3.757316667 | 0.170446566 | 1 | #DIV/0! |
| Slc24a4 238384      | -3.757316667 | 0.170446566 | 1 | #DIV/0! |
| 6330545A04Rik 76166 | -3.757316667 | 0.170446566 | 1 | #DIV/0! |
| Flg2 229574         | -3.757316667 | 0.170446566 | 1 | #DIV/0! |
| Trim43c 666731      | -3.757316667 | 0.170446566 | 1 | #DIV/0! |
| Sacs 50720          | -3.757316667 | 0.170446566 | 1 | #DIV/0! |
| Aspn 66695          | -3.757316667 | 0.170446566 | 1 | #DIV/0! |
| Hmgcll1 208982      | -3.757316667 | 0.170446566 | 1 | #DIV/0! |
| Ppfia3 76787        | -3.757316667 | 0.170446566 | 1 | #DIV/0! |
| Kcnj12 16515        | -3.757316667 | 0.170446566 | 1 | #DIV/0! |

|                         |              |             |              |             |
|-------------------------|--------------|-------------|--------------|-------------|
| Lrrc4 192198            | -3.757316667 | 0.170446566 | 1            | #DIV/0!     |
| Entpd3 215446           | -3.757316667 | 0.170446566 | 1            | #DIV/0!     |
| 3110035E14Rik 76982     | -3.757316667 | 0.170446566 | 1            | #DIV/0!     |
| Rgnf 110596             | -3.757316667 | 0.170446566 | 1            | #DIV/0!     |
| Ano2 243634             | -3.757316667 | 0.170446566 | 1            | #DIV/0!     |
| Magi2 50791             | -3.757316667 | 0.170446566 | 1            | #DIV/0!     |
| C1ql4 239659            | -3.757316667 | 0.170446566 | 1            | #DIV/0!     |
| Pdzd7 212684            | -3.757316667 | 0.170446566 | 1            | #DIV/0!     |
| Nipsnap3a 73398         | -3.757316667 | 0.170446566 | 1            | #DIV/0!     |
| Cst9 13013              | -3.757316667 | 0.170446566 | 1            | #DIV/0!     |
| Gm14164 791417          | -3.757316667 | 0.170446566 | 1            | #DIV/0!     |
| Gm13154 433804          | -3.757316667 | 0.170446566 | 1            | #DIV/0!     |
| 5031434O11Rik 100039684 | -3.757316667 | 0.170446566 | 1            | #DIV/0!     |
| Tas2r126 387353         | -3.757316667 | 0.170446566 | 1            | #DIV/0!     |
| Ccdc7 74703             | -3.757316667 | 0.170446566 | 1            | #DIV/0!     |
| Hctr1 230777            | -3.757316667 | 0.170446566 | 1            | #DIV/0!     |
| Rph3a 19894             | -3.757316667 | 0.170446566 | 1            | #DIV/0!     |
| Ankrd32 105377          | -3.763436835 | 0.079830056 | -7.725       | 0.072984714 |
| Kif18a 228421           | -3.783486464 | 0.074070559 | -11.79098333 | 0.044340227 |
| Nr3c2 110784            | -3.786453319 | 0.059532397 | -2.436615709 | 0.096117552 |
| Serpina7 331535         | -3.78662814  | 0.036592561 | -2.780152612 | 0.06421625  |
| Spag17 74362            | -3.802083333 | 0.170446566 | 1            | #DIV/0!     |
| Car3 12350              | -3.805007256 | 0.042683101 | -3.957832631 | 0.000806178 |
| Tnc 21923               | -3.828148571 | 0.080801914 | -6.38098     | 0.020002315 |
| Ccdc92 215707           | -3.831116667 | 0.058469763 | -12.46038    | 0.00415976  |
| Prdx6b 320769           | -3.842759522 | 0.035764925 | -11.32618    | 0.006284669 |
| Ccdc85c 668158          | -3.84780617  | 0.007468245 | -5.973314477 | 0.005337981 |
| Pcdhga7 93715           | -3.866666667 | 0.170446566 | 1            | #DIV/0!     |
| Cpe 12876               | -3.867731421 | 0.120927163 | -8.6996      | 0.024337076 |
| Mthfd2l 665563          | -3.868771629 | 0.145255652 | -5.68578     | 0.079282153 |
| Tff2 21785              | -3.884686127 | 0.227397646 | 1            | #DIV/0!     |
| Cxcr5 12145             | -3.898949654 | 0.144309579 | -4.58098     | 0.070596339 |
| Kcng2 240444            | -3.899017143 | 0.073294895 | -7.64656     | 0.072618354 |
| Pou2f1 18986            | -3.909903987 | 0.01383886  | -3.909903987 | 0.01383886  |
| Gpr135 238252           | -3.910222857 | 0.110885741 | -5.68578     | 0.079282153 |
| Tssk4 71099             | -3.913834286 | 0.220458896 | 1            | #DIV/0!     |
| Pcsk9 100102            | -3.926378226 | 0.02320206  | -2.402670307 | 0.003424212 |
| Zfp800 627049           | -3.934884706 | 0.066180567 | -27.8721     | 0.028446391 |
| Ankrd13d 68423          | -3.93868     | 0.058090855 | -7.53538     | 0.026553614 |
| Mylpf 17907             | -3.950974939 | 0.012374846 | -14.57554    | 5.88971E-05 |
| Tas1r2 83770            | -3.967316667 | 0.072480209 | -3.967316667 | 0.072480209 |
| Ly6g5b 266614           | -3.967316667 | 0.072480209 | -3.967316667 | 0.072480209 |
| Gpr27 14761             | -3.967316667 | 0.072480209 | -3.967316667 | 0.072480209 |
| Serpini1 20713          | -3.967316667 | 0.072480209 | -3.967316667 | 0.072480209 |
| Ccr3 12771              | -3.967316667 | 0.072480209 | -3.967316667 | 0.072480209 |
| BC030476 239368         | -3.967316667 | 0.072480209 | -3.967316667 | 0.072480209 |
| Inpp5j 170835           | -3.967316667 | 0.072480209 | -3.967316667 | 0.072480209 |
| Cacna1i 239556          | -3.967316667 | 0.072480209 | -3.967316667 | 0.072480209 |
| 3110021A11Rik 67289     | -3.967316667 | 0.072480209 | -3.967316667 | 0.072480209 |
| Fam154b 330577          | -3.967316667 | 0.072480209 | -3.967316667 | 0.072480209 |
| Tro 56191               | -3.967316667 | 0.072480209 | -3.967316667 | 0.072480209 |
| DXBay18 574405          | -3.967316667 | 0.072480209 | -3.967316667 | 0.072480209 |
| Ccr9 12769              | -3.968502857 | 0.053196162 | -7.88976     | 0.029636667 |

|                         |              |             |              |             |
|-------------------------|--------------|-------------|--------------|-------------|
| Gjc1 14615              | -3.969828571 | 0.058185722 | -7.5452      | 0.025671227 |
| Kif13b 16554            | -3.973451163 | 0.080569928 | -2.168712143 | 0.103339441 |
| Cd177 68891             | -3.98415     | 0.072501035 | -3.98415     | 0.072501035 |
| Lox 16948               | -3.98415     | 0.072501035 | -3.98415     | 0.072501035 |
| Tbx4 21387              | -3.98415     | 0.072501035 | -3.98415     | 0.072501035 |
| Pcdhb17 93888           | -3.98415     | 0.072501035 | -3.98415     | 0.072501035 |
| B3gnt6 272411           | -3.98415     | 0.072501035 | -3.98415     | 0.072501035 |
| Zfp459 328274           | -3.98415     | 0.072501035 | -3.98415     | 0.072501035 |
| Sit1 54390              | -3.98415     | 0.072501035 | -3.98415     | 0.072501035 |
| Fmod 14264              | -3.984164185 | 0.001858819 | -3.984164185 | 0.001858819 |
| Vav3 57257              | -4.000996667 | 0.131062407 | -8.38098     | 0.03489567  |
| Ptpn22 19260            | -4.007028571 | 0.072378198 | -7.7746      | 0.072687134 |
| Tbx20 57246             | -4.007028571 | 0.072378198 | -7.7746      | 0.072687134 |
| Tlr7 170743             | -4.01231643  | 0.025882697 | -12.50411667 | 0.010000955 |
| Caps2 353025            | -4.016833333 | 0.072468013 | -4.016833333 | 0.072468013 |
| 4732415M23Rik 320869    | -4.016833333 | 0.072468013 | -4.016833333 | 0.072468013 |
| Clic3 69454             | -4.016833333 | 0.072468013 | -4.016833333 | 0.072468013 |
| 2900002K06Rik 70226     | -4.016833333 | 0.072468013 | -4.016833333 | 0.072468013 |
| BB123696 105404         | -4.016833333 | 0.072468013 | -4.016833333 | 0.072468013 |
| Shank1 243961           | -4.016833333 | 0.072468013 | -4.016833333 | 0.072468013 |
| Peg12 27412             | -4.016833333 | 0.072468013 | -4.016833333 | 0.072468013 |
| Chrna4 11438            | -4.016833333 | 0.072468013 | -4.016833333 | 0.072468013 |
| 4933403G14Rik 74393     | -4.016833333 | 0.072468013 | -4.016833333 | 0.072468013 |
| 9430060I03Rik 100037260 | -4.017333333 | 0.072500935 | -4.017333333 | 0.072500935 |
| Fam57a 116972           | -4.027877354 | 0.033211771 | -2.926135751 | 0.053529524 |
| Hace1 209462            | -4.028654921 | 0.036356264 | -6.990550505 | 0.02980384  |
| Fam151a 230579          | -4.031371283 | 0.04138522  | -18.08462821 | 0.016396663 |
| B3gnt9-ps 97440         | -4.045849493 | 0.056054929 | -4.990597974 | 0.062871287 |
| Mtbp 105837             | -4.100059906 | 0.032041164 | -6.864031618 | 0.027260213 |
| Abca17 381072           | -4.1013      | 0.170446566 | 1            | #DIV/0!     |
| Wscd2 320916            | -4.1013      | 0.170446566 | 1            | #DIV/0!     |
| Padi4 18602             | -4.1013      | 0.170446566 | 1            | #DIV/0!     |
| Gm10046 100043229       | -4.1013      | 0.170446566 | 1            | #DIV/0!     |
| Zfp712 78251            | -4.1013      | 0.170446566 | 1            | #DIV/0!     |
| Ikzf3 22780             | -4.1013      | 0.170446566 | 1            | #DIV/0!     |
| Prrg1 546336            | -4.1013      | 0.170446566 | 1            | #DIV/0!     |
| 3110079015Rik 73234     | -4.1013      | 0.170446566 | 1            | #DIV/0!     |
| Tagap 72536             | -4.105815747 | 0.059219726 | -9.6606      | 0.02250222  |
| Chml 12663              | -4.106547394 | 0.011374079 | -5.819498074 | 0.008325994 |
| Ggt7 207182             | -4.132142138 | 0.024778656 | -29.43173333 | 0.00493151  |
| Aff3 16764              | -4.132575874 | 0.051944503 | -15.74311667 | 0.027477208 |
| Tyro3 22174             | -4.14312     | 0.157863084 | -3.9746      | 0.173296754 |
| Hdgfrp3 29877           | -4.158125202 | 0.04781766  | -5.40412236  | 0.027479211 |
| 4933437F05Rik 71275     | -4.166666667 | 0.170446566 | 1            | #DIV/0!     |
| Gal3st2 381334          | -4.166666667 | 0.170446566 | 1            | #DIV/0!     |
| 1700026L06Rik 69987     | -4.166666667 | 0.170446566 | 1            | #DIV/0!     |
| Rab15 104886            | -4.166666667 | 0.170446566 | 1            | #DIV/0!     |
| Gm14492 677289          | -4.166666667 | 0.170446566 | 1            | #DIV/0!     |
| Cdc6 23834              | -4.166666667 | 0.170446566 | 1            | #DIV/0!     |
| Lca5 75782              | -4.166666667 | 0.170446566 | 1            | #DIV/0!     |
| Lrrc8b 433926           | -4.166666667 | 0.170446566 | 1            | #DIV/0!     |
| 9330175E14Rik 320377    | -4.166666667 | 0.170446566 | 1            | #DIV/0!     |
| Meox1 17285             | -4.166666667 | 0.170446566 | 1            | #DIV/0!     |

|                      |              |             |              |             |
|----------------------|--------------|-------------|--------------|-------------|
| Vmn1r90 627280       | -4.166666667 | 0.170446566 | 1            | #DIV/0!     |
| Gen1 209334          | -4.166666667 | 0.170446566 | 1            | #DIV/0!     |
| Zfa 22639            | -4.166666667 | 0.170446566 | 1            | #DIV/0!     |
| Olf920 258783        | -4.166666667 | 0.170446566 | 1            | #DIV/0!     |
| Hepacam 72927        | -4.166666667 | 0.170446566 | 1            | #DIV/0!     |
| Osm 18413            | -4.166666667 | 0.170446566 | 1            | #DIV/0!     |
| Zfp808 630579        | -4.166666667 | 0.170446566 | 1            | #DIV/0!     |
| Gprasp2 245607       | -4.166666667 | 0.170446566 | 1            | #DIV/0!     |
| Gja10 14610          | -4.166666667 | 0.170446566 | 1            | #DIV/0!     |
| Scube2 56788         | -4.166666667 | 0.170446566 | 1            | #DIV/0!     |
| Slc39a10 227059      | -4.17042407  | 0.060649645 | -9.68976     | 0.005314071 |
| Crybb3 12962         | -4.185571416 | 0.026568015 | -16.65013333 | 0.009431887 |
| Atp10a 11982         | -4.189742857 | 0.07576674  | -7.64656     | 0.072618354 |
| 6530402F18Rik 76220  | -4.190315477 | 0.031462601 | -7.01513114  | 0.027246689 |
| Ms4a4c 64380         | -4.194345334 | 0.002219971 | -4.788455993 | 0.000233968 |
| Dgkg 110197          | -4.200333333 | 0.170446566 | 1            | #DIV/0!     |
| Rpl39l 68172         | -4.200333333 | 0.170446566 | 1            | #DIV/0!     |
| St8sia2 20450        | -4.200333333 | 0.170446566 | 1            | #DIV/0!     |
| Igsf1 209268         | -4.200333333 | 0.170446566 | 1            | #DIV/0!     |
| Casq2 12373          | -4.200333333 | 0.170446566 | 1            | #DIV/0!     |
| Caly 68566           | -4.200333333 | 0.170446566 | 1            | #DIV/0!     |
| Dnahc17 69926        | -4.200333333 | 0.170446566 | 1            | #DIV/0!     |
| Trim69 70928         | -4.200333333 | 0.170446566 | 1            | #DIV/0!     |
| Ms4a1 12482          | -4.200333333 | 0.170446566 | 1            | #DIV/0!     |
| Pcdhb5 93876         | -4.200333333 | 0.170446566 | 1            | #DIV/0!     |
| Gnaz 14687           | -4.200333333 | 0.170446566 | 1            | #DIV/0!     |
| Eif2c3 214150        | -4.211428571 | 0.023316371 | -12.28333333 | 0.010495633 |
| Pitpnm3 327958       | -4.236894741 | 0.041320968 | -9.5948      | 0.027916032 |
| Tssk6 83984          | -4.259687891 | 0.084422417 | -13.27503333 | 0.061241107 |
| Prr22 224908         | -4.264899556 | 0.021023564 | -28.9404     | 0.00426534  |
| Mybpc3 17868         | -4.311814788 | 0.10764473  | -6.60118     | 0.089542423 |
| Atp8b4 241633        | -4.315142462 | 0.04712525  | -21.13715    | 0.022968078 |
| Moap1 64113          | -4.343321901 | 0.221721953 | 2.44286      | 0.173296754 |
| Efha2 78506          | -4.406902121 | 0.019363604 | -10.48058    | 0.003988962 |
| Gm3417 100041586     | -4.413441822 | 0.076654802 | -2.76078     | 0.173296754 |
| Cep170 545389        | -4.429162435 | 0.033163075 | -31.5473     | 0.01175898  |
| Tnni3 21954          | -4.441534446 | 0.218797203 | 1            | #DIV/0!     |
| Sult2a7 638251       | -4.508294439 | 0.003632886 | -4.837219759 | 0.003954989 |
| 6430562O15Rik 320893 | -4.516666667 | 0.170446566 | 1            | #DIV/0!     |
| Ccdc48 58229         | -4.534497143 | 0.01932204  | -13.22561667 | 0.009603687 |
| Prss50 235631        | -4.585345473 | 0.06717417  | -11.43774    | 0.066710478 |
| Sqle 20775           | -4.600024978 | 0.035396829 | -2.584234184 | 0.016843922 |
| 1500004A13Rik 319830 | -4.623339693 | 0.054638186 | -5.129565848 | 0.001788852 |
| Mzf1 109889          | -4.709622547 | 0.010129409 | -22.28176    | 9.71651E-05 |
| Zfp69 381549         | -4.736897674 | 0.031167344 | -18.8433     | 0.01666352  |
| Grk4 14772           | -4.737557892 | 0.032989512 | -10.6996     | 0.021466055 |
| 40971 320253         | -4.801838452 | 0.023445101 | -19.10163333 | 0.011400496 |
| Matk 17179           | -4.81141617  | 0.040162457 | -12.44136    | 0.003844518 |
| Cacna1a 12286        | -4.830657143 | 0.100023492 | -6.38098     | 0.020002315 |
| D630029K05Rik 103175 | -4.904816667 | 0.080654503 | -2.76078     | 0.148332518 |
| Pla2g4f 271844       | -4.904816667 | 0.080654503 | -2.76078     | 0.148332518 |
| Ephx4 384214         | -4.904816667 | 0.080654503 | -2.76078     | 0.148332518 |
| Kcnd1 16506          | -4.9375      | 0.079997504 | -2.8         | 0.148332518 |

|                      |              |             |              |             |
|----------------------|--------------|-------------|--------------|-------------|
| 5730577103Rik 66662  | -4.9375      | 0.079997504 | -2.8         | 0.148332518 |
| Parp8 52552          | -4.9375      | 0.079997504 | -2.8         | 0.148332518 |
| Gal3st3 545276       | -4.9375      | 0.079997504 | -2.8         | 0.148332518 |
| Trpv1 193034         | -4.9375      | 0.079997504 | -2.8         | 0.148332518 |
| Cd209a 170786        | -4.9375      | 0.079997504 | -2.8         | 0.148332518 |
| Mageb3 17147         | -4.9375      | 0.079997504 | -2.8         | 0.148332518 |
| Ptgir 19222          | -4.94615     | 0.08117076  | -2.76078     | 0.148332518 |
| Fndc8 78919          | -4.94615     | 0.08117076  | -2.76078     | 0.148332518 |
| Sh3d20 70559         | -4.94615     | 0.08117076  | -2.76078     | 0.148332518 |
| BC006965 217294      | -4.94615     | 0.08117076  | -2.76078     | 0.148332518 |
| Alox5 11689          | -4.94615     | 0.08117076  | -2.76078     | 0.148332518 |
| Fam171b 241520       | -4.94615     | 0.08117076  | -2.76078     | 0.148332518 |
| AA474331 213332      | -4.94615     | 0.08117076  | -2.76078     | 0.148332518 |
| Rmrp 19782           | -4.94615     | 0.08117076  | -2.76078     | 0.148332518 |
| B230319C09Rik 320775 | -4.94615     | 0.08117076  | -2.76078     | 0.148332518 |
| Hrasls 27281         | -4.94615     | 0.08117076  | -2.76078     | 0.148332518 |
| Ect2l 100039660      | -4.94615     | 0.08117076  | -2.76078     | 0.148332518 |
| Rbl1 19650           | -4.952504466 | 0.010835139 | -12.46038    | 0.00415976  |
| Gprc5a 232431        | -4.954333333 | 0.079673302 | -2.8202      | 0.148332518 |
| Ano5 233246          | -4.954333333 | 0.079673302 | -2.8202      | 0.148332518 |
| Necab3 56846         | -4.954333333 | 0.079673302 | -2.8202      | 0.148332518 |
| Panx2 406218         | -4.954333333 | 0.079673302 | -2.8202      | 0.148332518 |
| Rell2 225392         | -4.960316667 | 0.170446566 | 1            | #DIV/0!     |
| 1700001J03Rik 69282  | -4.978833333 | 0.080496976 | -2.8         | 0.148332518 |
| Ccl22 20299          | -4.978833333 | 0.080496976 | -2.8         | 0.148332518 |
| Ect2 13605           | -4.978833333 | 0.080496976 | -2.8         | 0.148332518 |
| Slc2a12 353169       | -4.978833333 | 0.080496976 | -2.8         | 0.148332518 |
| Sidt1 320007         | -4.995666667 | 0.080164031 | -2.8202      | 0.148332518 |
| Fam13c 71721         | -4.995666667 | 0.080164031 | -2.8202      | 0.148332518 |
| Barx2 12023          | -4.995666667 | 0.080164031 | -2.8202      | 0.148332518 |
| Zmynd10 114602       | -4.995666667 | 0.080164031 | -2.8202      | 0.148332518 |
| Ipcef1 320495        | -4.995666667 | 0.080164031 | -2.8202      | 0.148332518 |
| 2310010M20Rik 69576  | -4.995666667 | 0.080164031 | -2.8202      | 0.148332518 |
| Cdkn2b 12579         | -4.995666667 | 0.080164031 | -2.8202      | 0.148332518 |
| Rccd1 269955         | -5.048451727 | 0.010992564 | -11.19259596 | 0.007584192 |
| Pde5a 242202         | -5.075705142 | 0.018679422 | -19.33598333 | 0.009621034 |
| Dpf1 29861           | -5.100686682 | 0.01002458  | -12.82514    | 0.003882869 |
| Pcdhga2 93710        | -5.104166667 | 0.170446566 | 1            | #DIV/0!     |
| Nkx6-2 14912         | -5.112474817 | 0.06949652  | -2.775680432 | 0.078579103 |
| Wee1 22390           | -5.139616667 | 0.058644094 | -16.8377     | 0.054336293 |
| Clstn2 64085         | -5.224633333 | 0.084711076 | -2.76078     | 0.148332518 |
| Cited1 12705         | -5.224633333 | 0.084711076 | -2.76078     | 0.148332518 |
| Fzd9 14371           | -5.224633333 | 0.084711076 | -2.76078     | 0.148332518 |
| Tspo2 70026          | -5.224633333 | 0.084711076 | -2.76078     | 0.148332518 |
| Scn10a 20264         | -5.224633333 | 0.084711076 | -2.76078     | 0.148332518 |
| Efn4 13639           | -5.224633333 | 0.084711076 | -2.76078     | 0.148332518 |
| Zfp521 225207        | -5.224633333 | 0.084711076 | -2.76078     | 0.148332518 |
| Gm13242 100041379    | -5.224633333 | 0.084711076 | -2.76078     | 0.148332518 |
| Adamts12 239337      | -5.224633333 | 0.084711076 | -2.76078     | 0.148332518 |
| Gipc3 209047         | -5.224633333 | 0.084711076 | -2.76078     | 0.148332518 |
| Uhrf1 18140          | -5.224633333 | 0.084711076 | -2.76078     | 0.148332518 |
| Podnl1 244550        | -5.232446089 | 0.033607249 | -14.45118    | 0.015946801 |
| Rnf32 56874          | -5.257316667 | 0.08394264  | -2.8         | 0.148332518 |



|                      |              |             |              |             |
|----------------------|--------------|-------------|--------------|-------------|
| Zbtb3 75291          | -5.257316667 | 0.08394264  | -2.8         | 0.148332518 |
| Slc6a4 15567         | -5.257316667 | 0.08394264  | -2.8         | 0.148332518 |
| Pask 269224          | -5.257316667 | 0.08394264  | -2.8         | 0.148332518 |
| Fam196a 627214       | -5.257316667 | 0.08394264  | -2.8         | 0.148332518 |
| Slc25a2 83885        | -5.257316667 | 0.08394264  | -2.8         | 0.148332518 |
| Melk 17279           | -5.257316667 | 0.08394264  | -2.8         | 0.148332518 |
| Hmgn3 94353          | -5.257316667 | 0.08394264  | -2.8         | 0.148332518 |
| Garnl3 99326         | -5.257316667 | 0.08394264  | -2.8         | 0.148332518 |
| Cd209c 170776        | -5.257316667 | 0.08394264  | -2.8         | 0.148332518 |
| Kcnk4 16528          | -5.27415     | 0.083560145 | -2.8202      | 0.148332518 |
| Ttl12 100216474      | -5.27415     | 0.083560145 | -2.8202      | 0.148332518 |
| Me3 109264           | -5.27415     | 0.083560145 | -2.8202      | 0.148332518 |
| Akr1c1 70861         | -5.27415     | 0.083560145 | -2.8202      | 0.148332518 |
| Tmem59l 67937        | -5.27415     | 0.083560145 | -2.8202      | 0.148332518 |
| Prss30 30943         | -5.27415     | 0.083560145 | -2.8202      | 0.148332518 |
| Myom2 17930          | -5.27415     | 0.083560145 | -2.8202      | 0.148332518 |
| Ly6g6c 68468         | -5.27415     | 0.083560145 | -2.8202      | 0.148332518 |
| Tubb2b 73710         | -5.31165     | 0.072540194 | -5.31165     | 0.072540194 |
| 1700029I01Rik 70005  | -5.341202015 | 0.162567817 | -3.9746      | 0.173296754 |
| Gabbr2 242425        | -5.433939815 | 0.025372958 | -6.184243646 | 0.006359085 |
| Blnc 17060           | -5.450616667 | 0.003911042 | -27.25308333 | 0.000855779 |
| D6Mm5e 110958        | -5.6013      | 0.088228602 | -2.8         | 0.148332518 |
| Zmynd17 74843        | -5.633983333 | 0.089892176 | -2.76078     | 0.148332518 |
| Boc 117606           | -5.633983333 | 0.089892176 | -2.76078     | 0.148332518 |
| Fktn 246179          | -5.662454594 | 0.040372478 | -14.53018    | 0.016384346 |
| Rasl10a 75668        | -5.66765     | 0.090309247 | -2.76078     | 0.148332518 |
| Gm12839 631037       | -5.66765     | 0.090309247 | -2.76078     | 0.148332518 |
| Cdx4 12592           | -5.66765     | 0.090309247 | -2.76078     | 0.148332518 |
| Cd209f 69142         | -5.676888205 | 0.028110088 | -16.57276    | 0.023349923 |
| Lrrc17 74511         | -5.6835      | 0.08860069  | -2.8202      | 0.148332518 |
| Cd8a 12525           | -5.700333333 | 0.089443396 | -2.8         | 0.148332518 |
| Gpr3 14748           | -5.7353      | 0.170446566 | 1            | #DIV/0!     |
| Meig1 104362         | -5.7353      | 0.170446566 | 1            | #DIV/0!     |
| Il27 246779          | -5.7353      | 0.170446566 | 1            | #DIV/0!     |
| Rhox8 434768         | -5.7353      | 0.170446566 | 1            | #DIV/0!     |
| Tmem150c 231503      | -5.7353      | 0.170446566 | 1            | #DIV/0!     |
| 4933431E20Rik 329735 | -5.782027982 | 0.001213507 | -11.62448348 | 0.000814706 |
| Sult2a3 629203       | -5.786906996 | 0.05022558  | -24.90022    | 0.012979003 |
| Trpm6 225997         | -5.826863696 | 0.12925353  | -7.815       | 0.072872131 |
| Uprt 331487          | -5.833333333 | 0.170446566 | 1            | #DIV/0!     |
| F830002L21Rik 414125 | -5.833333333 | 0.170446566 | 1            | #DIV/0!     |
| Fut4 14345           | -5.833333333 | 0.170446566 | 1            | #DIV/0!     |
| Gli2 14633           | -5.833333333 | 0.170446566 | 1            | #DIV/0!     |
| Fv1 14349            | -5.833333333 | 0.170446566 | 1            | #DIV/0!     |
| A430093F15Rik 403202 | -5.833333333 | 0.170446566 | 1            | #DIV/0!     |
| Flnc 68794           | -5.861702857 | 0.112981056 | -7.81754     | 0.173296754 |
| D630003M21Rik 228846 | -5.863159219 | 0.011675226 | -4.247235302 | 0.003274015 |
| Ckmt2 76722          | -5.883833333 | 0.170446566 | 1            | #DIV/0!     |
| Myh3 17883           | -5.916333333 | 0.072473362 | -5.916333333 | 0.072473362 |
| Fgf9 14180           | -5.916333333 | 0.072473362 | -5.916333333 | 0.072473362 |
| 1700019B03Rik 76406  | -5.916333333 | 0.072473362 | -5.916333333 | 0.072473362 |
| Far2 330450          | -6.005062912 | 0.042650456 | -29.415      | 0.032516007 |
| Sell 20343           | -6.027504733 | 0.014722808 | -14.46038    | 0.010822609 |

|                      |              |             |              |             |
|----------------------|--------------|-------------|--------------|-------------|
| Gm5640 434797        | -6.041666667 | 0.170446566 | 1            | #DIV/0!     |
| Dnahc11 13411        | -6.041666667 | 0.170446566 | 1            | #DIV/0!     |
| Xlr3b 574437         | -6.119783333 | 0.170446566 | 1            | #DIV/0!     |
| Tmem154 320782       | -6.124333333 | 0.170446566 | 1            | #DIV/0!     |
| Dpep2 319446         | -6.124333333 | 0.170446566 | 1            | #DIV/0!     |
| Cckar 12425          | -6.124333333 | 0.170446566 | 1            | #DIV/0!     |
| Foxf1a 15227         | -6.165848748 | 0.04891509  | -6.165848748 | 0.04891509  |
| 0610039K10Rik 68386  | -6.194816667 | 0.072975795 | -6.194816667 | 0.072975795 |
| Tbx19 83993          | -6.194816667 | 0.072975795 | -6.194816667 | 0.072975795 |
| Sost 74499           | -6.194816667 | 0.072975795 | -6.194816667 | 0.072975795 |
| Cspg5 29873          | -6.194816667 | 0.072975795 | -6.194816667 | 0.072975795 |
| Creb5 231991         | -6.194816667 | 0.072975795 | -6.194816667 | 0.072975795 |
| Col4a6 94216         | -6.194816667 | 0.072975795 | -6.194816667 | 0.072975795 |
| Gabre 14404          | -6.23615     | 0.072846013 | -6.23615     | 0.072846013 |
| C920009B18Rik 606736 | -6.23615     | 0.072846013 | -6.23615     | 0.072846013 |
| 1810062O18Rik 75602  | -6.23615     | 0.072846013 | -6.23615     | 0.072846013 |
| Foxp3 20371          | -6.266933333 | 0.072599614 | -6.266933333 | 0.072599614 |
| Hgf 15234            | -6.348331429 | 0.019871512 | -12.84416    | 0.004174475 |
| Npl 74091            | -6.376766175 | 0.025283065 | -14.32352    | 0.023723069 |
| Gpr183 321019        | -6.404816667 | 0.03059946  | -6.404816667 | 0.03059946  |
| 2010001M09Rik 69816  | -6.404816667 | 0.03059946  | -6.404816667 | 0.03059946  |
| Zfp831 100043757     | -6.404816667 | 0.03059946  | -6.404816667 | 0.03059946  |
| Zfp456 408065        | -6.404816667 | 0.03059946  | -6.404816667 | 0.03059946  |
| Mmp28 118453         | -6.404816667 | 0.03059946  | -6.404816667 | 0.03059946  |
| Sh2d5 230863         | -6.44615     | 0.031032931 | -6.44615     | 0.031032931 |
| Nmnat2 226518        | -6.44615     | 0.031032931 | -6.44615     | 0.031032931 |
| Srpx 51795           | -6.44615     | 0.031032931 | -6.44615     | 0.031032931 |
| Sgip1 73094          | -6.454333333 | 0.030184854 | -6.454333333 | 0.030184854 |
| Gm5409 386551        | -6.47715     | 0.097710279 | -2.8202      | 0.148332518 |
| E130306D19Rik 230098 | -6.495666667 | 0.030602242 | -6.495666667 | 0.030602242 |
| Fam109b 338368       | -6.495666667 | 0.030602242 | -6.495666667 | 0.030602242 |
| Dbp 13170            | -6.521435582 | 0.002826266 | -5.365739851 | 0.002478306 |
| 4833424O15Rik 75769  | -6.5388      | 0.074397793 | -3.925       | 0.148332518 |
| Lca5l 385668         | -6.5388      | 0.074397793 | -3.925       | 0.148332518 |
| 1700011H14Rik 67082  | -6.5388      | 0.074397793 | -3.925       | 0.148332518 |
| Anxa8 11752          | -6.580133333 | 0.074140319 | -6.580133333 | 0.074140319 |
| Fpr1 14293           | -6.596058671 | 0.000136764 | -6.596058671 | 0.000136764 |
| Cacna1c 12288        | -6.604166667 | 0.074741536 | -3.925       | 0.148332518 |
| D830031N03Rik 442834 | -6.604166667 | 0.074741536 | -3.925       | 0.148332518 |
| Tmem35 67564         | -6.6455      | 0.074462325 | -3.9746      | 0.148332518 |
| Snai3 30927          | -6.679166667 | 0.0746359   | -3.9746      | 0.148332518 |
| Atp10b 319767        | -6.681283333 | 0.170446566 | 1            | #DIV/0!     |
| 5730522E02Rik 70626  | -6.681283333 | 0.170446566 | 1            | #DIV/0!     |
| Thsd7b 210417        | -6.681283333 | 0.170446566 | 1            | #DIV/0!     |
| BC055324 381306      | -6.681283333 | 0.170446566 | 1            | #DIV/0!     |
| Ctnna2 12386         | -6.681283333 | 0.170446566 | 1            | #DIV/0!     |
| Il1rl1 17082         | -6.681283333 | 0.170446566 | 1            | #DIV/0!     |
| Onecut3 246086       | -6.681283333 | 0.170446566 | 1            | #DIV/0!     |
| 4921536K21Rik 67430  | -6.681283333 | 0.170446566 | 1            | #DIV/0!     |
| Tpsb2 17229          | -6.681283333 | 0.170446566 | 1            | #DIV/0!     |
| Olr1 108078          | -6.681283333 | 0.170446566 | 1            | #DIV/0!     |
| Pcdh15 11994         | -6.681283333 | 0.170446566 | 1            | #DIV/0!     |
| 1600014K23Rik 71996  | -6.681283333 | 0.170446566 | 1            | #DIV/0!     |

|                      |              |             |              |             |
|----------------------|--------------|-------------|--------------|-------------|
| Gm12359 100037262    | -6.724633333 | 0.034159916 | -4.56078     | 0.051959117 |
| Pax5 18507           | -6.741466667 | 0.033983246 | -4.58098     | 0.051978224 |
| Asb4 65255           | -6.741466667 | 0.033983246 | -4.58098     | 0.051978224 |
| 5730408K05Rik 67531  | -6.741466667 | 0.033983246 | -4.58098     | 0.051978224 |
| Klrg2 74253          | -6.858616667 | 0.07292953  | -6.858616667 | 0.07292953  |
| Xkrx 331524          | -6.858616667 | 0.07292953  | -6.858616667 | 0.07292953  |
| Gm11346 76024        | -6.923983333 | 0.073108617 | -6.923983333 | 0.073108617 |
| 6030419C18Rik 319477 | -6.923983333 | 0.073108617 | -6.923983333 | 0.073108617 |
| Krt80 74127          | -7.082420322 | 0.009347013 | -21.3085     | 0.002423147 |
| Mb 17189             | -7.1122456   | 0.169575856 | -2.777151865 | 0.10836643  |
| Slc22a28 434674      | -7.181866667 | 0.090606899 | -3.32        | 0.148332518 |
| Gm88 224813          | -7.2353      | 0.105817953 | -2.8         | 0.148332518 |
| Cdkl4 381113         | -7.267966667 | 0.07247851  | -7.267966667 | 0.07247851  |
| Kctd14 233529        | -7.267966667 | 0.07247851  | -7.267966667 | 0.07247851  |
| Kcna2 16490          | -7.350166667 | 0.10621631  | -2.8202      | 0.148332518 |
| Kif19a 286942        | -7.35115     | 0.108071376 | -2.76078     | 0.148332518 |
| Fank1 66930          | -7.38365     | 0.029242748 | -7.38365     | 0.029242748 |
| Slc35f2 72022        | -7.433166667 | 0.028728557 | -7.433166667 | 0.028728557 |
| 4921517L17Rik 70873  | -7.43435     | 0.072497133 | -7.43435     | 0.072497133 |
| Cdhr2 268663         | -7.5         | 0.170446566 | 1            | #DIV/0!     |
| Prrg4 228413         | -7.5         | 0.170446566 | 1            | #DIV/0!     |
| Rundc3b 242819       | -7.541666667 | 0.108485978 | -2.8         | 0.148332518 |
| 2610203C22Rik 72481  | -7.541666667 | 0.108485978 | -2.8         | 0.148332518 |
| Hrc 15464            | -7.567333333 | 0.170446566 | 1            | #DIV/0!     |
| Tceal3 594844        | -7.624316667 | 0.048963139 | -7.624316667 | 0.048963139 |
| Gm10565 100038693    | -7.624333333 | 0.109174211 | -2.8         | 0.148332518 |
| Barx1 12022          | -7.641166667 | 0.108702169 | -2.8202      | 0.148332518 |
| Ccdc160 434778       | -7.703466667 | 0.030520559 | -7.703466667 | 0.030520559 |
| Stac2 217154         | -7.703466667 | 0.030520559 | -7.703466667 | 0.030520559 |
| Cyt1 231162          | -7.73615     | 0.030148108 | -7.73615     | 0.030148108 |
| Nphp4 260305         | -7.73615     | 0.030148108 | -7.73615     | 0.030148108 |
| Fgf13 14168          | -7.73615     | 0.030148108 | -7.73615     | 0.030148108 |
| Dok7 231134          | -7.752983333 | 0.029962697 | -7.752983333 | 0.029962697 |
| Mylk3 213435         | -7.752983333 | 0.029962697 | -7.752983333 | 0.029962697 |
| Gnai1 14677          | -7.897097143 | 0.092023903 | -23.0332     | 0.093667967 |
| Obscn 380698         | -8.0388      | 0.03215127  | -8.0388      | 0.03215127  |
| Mst1r 19882          | -8.080133333 | 0.032113161 | -8.080133333 | 0.032113161 |
| Trappc2 66226        | -8.112816667 | 0.032953773 | -8.112816667 | 0.032953773 |
| Plekhh1 211945       | -8.135866667 | 0.095562058 | -3.46        | 0.148332518 |
| Pcdhga9 93717        | -8.1371      | 0.082303856 | -4.11372     | 0.148332518 |
| Dlk2 106565          | -8.1486      | 0.114390887 | -2.76078     | 0.148332518 |
| Nyx 236690           | -8.1486      | 0.114390887 | -2.76078     | 0.148332518 |
| Tet1 52463           | -8.162333333 | 0.032338998 | -8.162333333 | 0.032338998 |
| Has3 15118           | -8.181283333 | 0.113485384 | -2.8         | 0.148332518 |
| Eef1a2 13628         | -8.198116667 | 0.113024445 | -2.8202      | 0.148332518 |
| Mir1941 100316694    | -8.198116667 | 0.113024445 | -2.8202      | 0.148332518 |
| Egr2 13654           | -8.270833333 | 0.08665517  | -3.925       | 0.148332518 |
| Leprel1 210530       | -8.3913      | 0.032927758 | -8.3913      | 0.032927758 |
| Gli3 14634           | -8.440816667 | 0.032305977 | -8.440816667 | 0.032305977 |
| Sfxn4 94281          | -8.440816667 | 0.032305977 | -8.440816667 | 0.032305977 |
| Parm1 231440         | -8.440816667 | 0.032305977 | -8.440816667 | 0.032305977 |
| Hnf4g 30942          | -8.561833333 | 0.088869733 | -3.925       | 0.148332518 |
| Mecom 14013          | -8.59065     | 0.08234736  | -4.30878     | 0.148332518 |

|                      |               |             |              |             |
|----------------------|---------------|-------------|--------------|-------------|
| Gypa 14934           | -8.67365      | 0.024954816 | -8.67365     | 0.024954816 |
| 9530009M10Rik 320856 | -8.67365      | 0.024954816 | -8.67365     | 0.024954816 |
| Gm6644 626009        | -8.689147434  | 0.144845475 | -2.64314     | 0.173296754 |
| Rab3c 67295          | -8.702283333  | 0.073152949 | -8.702283333 | 0.073152949 |
| Sp7 170574           | -8.769833333  | 0.170446566 | 1            | #DIV/0!     |
| Angpt4 11602         | -8.798983333  | 0.08375992  | -4.30878     | 0.148332518 |
| Dpysl4 26757         | -8.801633333  | 0.033258491 | -8.801633333 | 0.033258491 |
| Sstr2 20606          | -8.900483333  | 0.007764865 | -8.900483333 | 0.007764865 |
| Cldn4 12740          | -8.900483333  | 0.007764865 | -8.900483333 | 0.007764865 |
| Gm6524 624710        | -9.017633333  | 0.025878741 | -9.017633333 | 0.025878741 |
| Pln 18821            | -9.033666667  | 0.077981353 | -4.8404      | 0.148332518 |
| At1 73991            | -9.0585       | 0.061817996 | -4.6202      | 0.051947928 |
| Actn2 11472          | -9.067333333  | 0.119319775 | -2.8         | 0.148332518 |
| Bdkrb2 12062         | -9.083        | 0.026114379 | -9.083       | 0.026114379 |
| Ttc26 264134         | -9.083        | 0.026114379 | -9.083       | 0.026114379 |
| Mpp3 13384           | -9.09165      | 0.063731618 | -4.56078     | 0.051959117 |
| Hist1h2be 319179     | -9.09885      | 0.084656217 | -4.37894     | 0.148332518 |
| Ghrhr 14602          | -9.178966667  | 0.008580774 | -9.178966667 | 0.008580774 |
| Ak1 11636            | -9.203466667  | 0.008716537 | -9.203466667 | 0.008716537 |
| Frem1 329872         | -9.21165      | 0.008437944 | -9.21165     | 0.008437944 |
| Ndn 17984            | -9.21165      | 0.008437944 | -9.21165     | 0.008437944 |
| Dennd2c 329727       | -9.2203       | 0.008644074 | -9.2203      | 0.008644074 |
| 4921507P07Rik 70821  | -9.361483333  | 0.025742591 | -9.361483333 | 0.025742591 |
| Lrrn4 320974         | -9.361483333  | 0.025742591 | -9.361483333 | 0.025742591 |
| Gm14391 665001       | -9.362020513  | 0.038380913 | -9.14482     | 0.035522074 |
| Cdca7l 217946        | -9.402816667  | 0.025620866 | -9.402816667 | 0.025620866 |
| Zfp385c 278304       | -9.494766667  | 0.077438686 | -5.11372     | 0.148332518 |
| Gm4956 241041        | -9.60515      | 0.010493449 | -9.60515     | 0.010493449 |
| Sst 20604            | -9.605266667  | 0.170446566 | 1            | #DIV/0!     |
| Nr2c2 22026          | -9.637950515  | 0.122650282 | -11.66406    | 0.117632635 |
| Tmem229a 319832      | -9.730966667  | 0.045494217 | -5.7948      | 0.059069839 |
| 4921506M07Rik 70846  | -9.73815      | 0.047552281 | -5.68578     | 0.059527684 |
| D130017N08Rik 320064 | -9.908133333  | 0.010556556 | -9.908133333 | 0.010556556 |
| A230072E10Rik 331547 | -9.918783333  | 0.091274433 | -4.30878     | 0.148332518 |
| Nfkbid 243910        | -9.987816667  | 0.049134567 | -5.73538     | 0.060010083 |
| Nusap1 108907        | -10.061833333 | 0.049761807 | -5.725       | 0.058914492 |
| Zc3hav1l 209032      | -10.14115     | 0.045029246 | -6.10878     | 0.062608491 |
| Rftn2 74013          | -10.161433333 | 0.031931373 | -6.8996      | 0.051952835 |
| Cd8b1 12526          | -10.500983333 | 0.04290035  | -6.60118     | 0.068626797 |
| Fabp3 14077          | -10.53465     | 0.078560485 | -4.56078     | 0.051959117 |
| Zfp879 214779        | -10.618783333 | 0.054943378 | -5.725       | 0.058914492 |
| Abp1 76507           | -10.7203      | 0.001087301 | -12.66436    | 1.46142E-05 |
| Zfp455 218311        | -10.742       | 0.043882614 | -6.6404      | 0.067804405 |
| Olf1372-ps1 257871   | -10.742       | 0.043882614 | -6.6404      | 0.067804405 |
| Gbp1 14468           | -10.749666667 | 0.036080215 | -6.8996      | 0.051952835 |
| Pcdhgb2 93700        | -10.952083333 | 0.077077642 | -5.8625      | 0.148332518 |
| Popdc2 64082         | -11.165433333 | 0.037346851 | -6.38098     | 0.011940725 |
| Sulf1 240725         | -11.31915     | 0.036339011 | -7.23378     | 0.052414049 |
| Plcb4 18798          | -11.31915     | 0.036339011 | -7.23378     | 0.052414049 |
| Gm514 208080         | -11.40315     | 0.100270059 | -4.30878     | 0.148332518 |
| A730008H23Rik 212427 | -11.5748      | 0.020092838 | -7.88976     | 0.018871593 |
| Lrrc19 100061        | -11.640966667 | 0.000842659 | -13.76916    | 5.27897E-06 |
| Col23a1 237759       | -11.640966667 | 0.000842659 | -13.76916    | 5.27897E-06 |

|                        |              |             |              |             |
|------------------------|--------------|-------------|--------------|-------------|
| Acss1 68738            | -12.18448333 | 0.042466883 | -12.18448333 | 0.042466883 |
| D330028D13Rik 231946   | -12.31295    | 0.001093475 | -14.57554    | 1.49198E-05 |
| Ccdc158 320696         | -12.50816667 | 0.042679982 | -12.50816667 | 0.042679982 |
| Gm2518 100039957       | -12.71621667 | 0.028161145 | -12.71621667 | 0.028161145 |
| Gabrb3 14402           | -13.00465    | 0.007873374 | -9.35558     | 0.001847968 |
| Ckm 12715              | -13.24861667 | 0.073170373 | -13.24861667 | 0.073170373 |
| Plat 18791             | -13.72008333 | 0.018187122 | -9.44656     | 0.017457321 |
| Scai 320271            | -13.75065    | 0.000811755 | -16.30078    | 4.47165E-06 |
| Btc 12223              | -13.88365    | 0.02663959  | -8.66038     | 0.015258085 |
| Lef1 16842             | -13.93316667 | 0.026152107 | -8.7198      | 0.014875607 |
| Myh7 140781            | -13.99831667 | 0.170446566 | 1            | #DIV/0!     |
| Wnt2b 22414            | -14.76428333 | 0.012568228 | -10.6996     | 0.012963072 |
| TTMUSG0000016609 66803 | -14.85891667 | 0.122797642 | -3.8707      | 0.148332518 |
| P4ha3 320452           | -15.01008333 | 0.052796595 | -7.48578     | 0.016276578 |
| Sema3d 108151          | -15.4188     | 0.055611868 | -8.50256     | 0.083078807 |
| Dclk2 70762            | -15.71263333 | 0.002211314 | -15.71263333 | 0.002211314 |
| Lypd1 72585            | -16.91820917 | 0.097732253 | -14.35212    | 0.151447022 |
| Sssca1 56390           | -17.79908085 | 0.076432971 | -80.87961667 | 0.088053685 |
| Cand2 67088            | -18.02148333 | 0.002582566 | -18.02148333 | 0.002582566 |
| Cox6a2 12862           | -18.19798333 | 0.075056505 | -7.69616     | 0.053485125 |
| Actc1 11464            | -19.15151667 | 0.122312941 | -4.8         | 0.148332518 |
| Cyp2c55 72082          | -19.94473333 | 0.019176112 | -13.40736    | 0.017382437 |
| Prrt2 69017            | -20.3375     | 0.027087757 | -20.3375     | 0.027087757 |
| Myl3 17897             | -21.66613333 | 0.098140694 | -7.81754     | 0.148332518 |
| Rnaset2a 100037283     | -22.11666667 | 0.108584867 | -6.8         | 0.148332518 |
| Actg2 11468            | -24.22515    | 0.170446566 | 1            | #DIV/0!     |
| Spna1 20739            | -24.87213333 | 0.011000808 | -24.87213333 | 0.011000808 |
| Barhl1 54422           | -27.67323333 | 0.001556458 | -33.00788    | 4.79011E-05 |
| Aard 239435            | -27.97458333 | 0.000616649 | -27.97458333 | 0.000616649 |
| F830016B08Rik 240328   | -37.69991667 | 0.016287056 | -23.2399     | 6.55023E-05 |
| Myl2 17906             | -55.50071667 | 0.157784995 | -3.9746      | 0.148332518 |
| Myh6 17888             | -55.97699429 | 0.154502989 | -13.73766    | 0.026725499 |

Supplementary Table 2.

| Category       | Term                            | Count | %    | PValue   | Genes                                                                                                                                                                                                                                                                                                                                                                                                                                                                                                                                                                                                                                                                                                                                                                                                                                                                                | List Total | Pop Hits | Pop Total | Fold Enrichment | Bonferroni | Benjamini | FDR    |
|----------------|---------------------------------|-------|------|----------|--------------------------------------------------------------------------------------------------------------------------------------------------------------------------------------------------------------------------------------------------------------------------------------------------------------------------------------------------------------------------------------------------------------------------------------------------------------------------------------------------------------------------------------------------------------------------------------------------------------------------------------------------------------------------------------------------------------------------------------------------------------------------------------------------------------------------------------------------------------------------------------|------------|----------|-----------|-----------------|------------|-----------|--------|
| SP_PIR_KEYWORD | lipid synthesis                 | 14    | 2.36 | 5.51E-06 | SCD1, SCD2, ACACA, FDPS, LSS, SC4MOL, AWAT2, FAR2, AKR1C6, FASN, MVK, ELOVL6, IDI1, NSDHL                                                                                                                                                                                                                                                                                                                                                                                                                                                                                                                                                                                                                                                                                                                                                                                            | 518        | 99       | 17854     | 4.87414687      | 0.0019     | 0.001934  | 0.0075 |
| SP_PIR_KEYWORD | alternative splicing            | 174   | 29.3 | 9.58E-06 | ZC3HAV1, LTBP3, INO80, GPAT2, BC018242, MAP3K4, ANK3, SBSN, SLC4A3, 1700029G01RIK, MATK, SLC12A7, POU2AF1, MYLK3, SLC22A23, RBL1, MLXIPL, OLA1, WDR90, BCL2L11, LAT2, SSTR2, TRIM35, TNNT1, SGSM1, PITPNM3, ZFP280D, 6530402F18RIK, BMP2K, MST1R, PGCP, TDRD3, AB124611, BBS7, A730008H23RIK, ASAP1, BDKRB2, DENND2C, SEMA5B, PVRL4, TRP53BP1, MEIS3, PDE6C, TTBK2, GMIP, SPATS2, PVRL3, CEP170, RCCD1, STAMBPL1, D330028D13RIK, OLFM1, 6030446N20RIK, FGD4, FN1, SGIP1, SREBF1, REEP6, OBSCN, AGBL3, ABCB9, CSTF2, AK1, TNFRSF13C, PPAPDC1B, HACE1, HGF, SHANK2, CCDC158, MMAB, FOXP2, AWAT2, ABCG8, SEMA6A, GGT6, SAP130, FREM1, CCDC151, MYO19, RGS9, COL20A1, ARSB, NRP2, PRPH, POU6F1, ELF3, AGTPBP1, CDC14B, BCAR1, PION, BC052040, ACOT3, TTLL11, FAR2, SRPX, SERAC1, MFAP1B, HOMEZ, MTBP, SPIB, ZC3HAV1L, RTEL1, CCDC88B, SP100, FBXL21, PRG4, NUP88, ACNAT1, GPRASP1, SCAI, | 518        | 4481     | 17854     | 1.33838196      | 0.0034     | 0.001679  | 0.0131 |
| KEGG_PATHWAY   | mmu00982: Drug metabolism       | 11    | 1.85 | 5.12E-05 | CYP2A22, CYP2C55, CYP2C44, ADH1, UGT1A5, MAOA, AOX1, CYP2A5, GSTT1, CYP2B13, GSTM6, CYP2C19, CYP2C9, CYP2C8, CYP2C17, PYROXD1, CYP2D11, LDHD, SC4MOL, FAR2, ADH1, AKR1C6, FASN, MICAL1, KDM3A, NSDHL, CYP2G1, SCD1, CHDH, CYP2C55, SCD2, CYP2D40, MAOA, CYP4F14, CYP2B13, CYB5B, GMPR, AKR1C20, TET1, HAO1, ABP1, CYP2A22, DHFR, SQLE, AKR1C19, AOX1, CYP2A5, AOX3, LEPREL1, AKR1D1                                                                                                                                                                                                                                                                                                                                                                                                                                                                                                  | 167        | 75       | 5738      | 5.03936128      | 0.0068     | 0.006787  | 0.0599 |
| GOTERM_BP_FAT  | GO:0055114 ~oxidation reduction | 38    | 6.41 | 6.37E-05 | SCD1, SCD2, ACACA, FDPS, LSS, SC4MOL, AWAT2, FAR2, AKR1C6, FASN, MVK, ELOVL6, IDI1, NSDHL                                                                                                                                                                                                                                                                                                                                                                                                                                                                                                                                                                                                                                                                                                                                                                                            | 381        | 672      | 13588     | 2.01671666      | 0.1087     | 0.108696  | 0.1082 |

|                 |                                          |    |      |          |                                                                                                                                                                                                                                                 |     |     |       |            |        |          |        |
|-----------------|------------------------------------------|----|------|----------|-------------------------------------------------------------------------------------------------------------------------------------------------------------------------------------------------------------------------------------------------|-----|-----|-------|------------|--------|----------|--------|
| INTERPRO        | IPRO11993:Pieckstrin homology-type       | 22 | 3.71 | 1.05E-04 | ASAP1, E130306D19RIK, NUMBL, PRKD2, PLEKHA6, PLEKHG2, ADAP2, DOK3, DOK4, DAPP1, SH2D5, FAM109B, MFAP1B, DOK7, TBC1D4, SPRED3, EPB4.1L4B, PHLDB2, ARAP2, PRKD3, PLEKHA2, FGD4                                                                    | 513 | 289 | 17763 | 2.6358688  | 0.0912 | 0.091179 | 0.1637 |
| GOTERM_BP_FAT   | GO:0006694 ~steroid biosynthetic process | 10 | 1.69 | 1.53E-04 | HSD3B2, AKR1C6, FDPS, MVK, LSS, IDI1, AKR1D1, AKR1C20, SC4MOL, NSDHL                                                                                                                                                                            | 381 | 71  | 13588 | 5.02310451 | 0.2416 | 0.129158 | 0.26   |
| KEGG_PATHWAY    | mmu02010: ABC transporters               | 8  | 1.35 | 2.68E-04 | ABCG8, ABCB9, ABCB1A, ABCD1, ABCA8A, ABCC4, ABCA2, ABCA3                                                                                                                                                                                        | 167 | 45  | 5738  | 6.1083167  | 0.0351 | 0.017687 | 0.3133 |
| SP_PIR_KEYWORDS | oxidoreductase                           | 33 | 5.56 | 3.10E-04 | HSD3B2, SC4MOL, CYP2C44, CYP2D11, PYROXD1, LDHD, SC4MOL, FAR2, ADH1, AKR1C6, FASN, KDM3A, NSDHL, CYP2G1, SCD1, CHDH, CYP2C55, SCD2, CYP2D40, MAOA, CYP4F14, CYP2B13, GMPR, TET1, HAO1, ABP1, CYP2A22, DHFR, SQLE, AOX1, CYP2A5, LEPREL1, AKR1D1 | 518 | 572 | 17854 | 1.98849124 | 0.1032 | 0.035649 | 0.4236 |

|                  |                                     |     |      |          |                                                                                                                                                                                                                                                                                                                                                                                                                                                                                                                                                                                                                                                                                                                                                                                                                                                                                                                                                                                           |     |      |       |            |       |          |        |
|------------------|-------------------------------------|-----|------|----------|-------------------------------------------------------------------------------------------------------------------------------------------------------------------------------------------------------------------------------------------------------------------------------------------------------------------------------------------------------------------------------------------------------------------------------------------------------------------------------------------------------------------------------------------------------------------------------------------------------------------------------------------------------------------------------------------------------------------------------------------------------------------------------------------------------------------------------------------------------------------------------------------------------------------------------------------------------------------------------------------|-----|------|-------|------------|-------|----------|--------|
| GOTERM_MF<br>FAT | GO:0046872<br>~metal ion<br>binding | 137 | 23.1 | 3.75E-04 | SYT3, CAR5A, SYT7, ATP2B2,<br>MAP3K4, SLC25A23, RGN,<br>ZFP831, ZFP882, DDAH1,<br>SLC12A7, CYP2C55,<br>NUDT13, NCALD, MYLK3,<br>ACTN1, CYP2B13, TRIM35,<br>PITPNM3, ZFP280D, PDE5A,<br>PGCP, CYP2C44, SFXN4,<br>ASAP1, ZFP456, ZFP455,<br>GMIP, STAMBPL1, DHX58,<br>FGD4, SGIP1, SCD1, AGBL3,<br>SCD2, CYP2D40, ESRRB,<br>EFEMP2, ACACA, TREX1,<br>MYLPF, TET1, FOXP2,<br>PRPSAP2, ADAP2, FREM1,<br>MTR, MZF1, SLC13A3,<br>ZFHX2, IDI1, KLF1, ARSB,<br>PILRB2, ACVRL1, LDLR,<br>AGTPBP1, MMP28, GLI3,<br>SC4MOL, ZKSCAN4,<br>GM14391, PLCB4, STAC2,<br>PROZ, SETMAR, ITIH4,<br>ZFP354A, MICAL1,<br>ZC3HAV1L, RTEL1, ZFP354B,<br>ATP8B4, APCS, CAR14,<br>CYB5B, GMPR, PRKD2,<br>ZFP867, PKLR, CYP2A5,<br>ERN1, SPNA1, LEPREL1,<br>PRKD3, ZFP418, ZFP710,<br>ZFP395, SORD, ZFP715,<br>USP3, ZFP69, CD248,<br>ZFP398, TRIM14, PML,<br>TPCN2, DPF1, ZDHHC24,<br>NR1D1, TCEA3, ADH1, FASN,<br>ADAMTS10, PCSK9, KDM3A,<br>SLC39A5, XAF1, SCNN1A,<br>CAR1, THBS3, CHD3, CAR3,<br>CYP2G1, PM20D1, | 367 | 3850 | 13288 | 1.28840794 | 0.204 | 0.204016 | 0.5537 |
|------------------|-------------------------------------|-----|------|----------|-------------------------------------------------------------------------------------------------------------------------------------------------------------------------------------------------------------------------------------------------------------------------------------------------------------------------------------------------------------------------------------------------------------------------------------------------------------------------------------------------------------------------------------------------------------------------------------------------------------------------------------------------------------------------------------------------------------------------------------------------------------------------------------------------------------------------------------------------------------------------------------------------------------------------------------------------------------------------------------------|-----|------|-------|------------|-------|----------|--------|



|                  |                                                                       |     |      |          |                                                                                                                                                                                                                                                                                                                                                                                                                                                                                                                                                                                                                                                                                                                                                                                                                                                                                                                                                                                          |     |      |       |            |        |          |        |
|------------------|-----------------------------------------------------------------------|-----|------|----------|------------------------------------------------------------------------------------------------------------------------------------------------------------------------------------------------------------------------------------------------------------------------------------------------------------------------------------------------------------------------------------------------------------------------------------------------------------------------------------------------------------------------------------------------------------------------------------------------------------------------------------------------------------------------------------------------------------------------------------------------------------------------------------------------------------------------------------------------------------------------------------------------------------------------------------------------------------------------------------------|-----|------|-------|------------|--------|----------|--------|
| GOTERM_MF<br>FAT | GO:0043169<br>~cation<br>binding                                      | 138 | 23.3 | 3.80E-04 | SYT3, CAR5A, SYT7, ATP2B2,<br>MAP3K4, SLC25A23, RGN,<br>ZFP831, ZFP882, DDAH1,<br>SLC12A7, CYP2C55,<br>NUDT13, NCALD, MYLK3,<br>ACTN1, CYP2B13, TRIM35,<br>PITPNM3, ZFP280D, PDE5A,<br>PGCP, CYP2C44, SFXN4,<br>ASAP1, ZFP456, ZFP455,<br>GMIP, STAMBPL1, DHX58,<br>FGD4, SGIP1, SCD1, AGBL3,<br>SCD2, CYP2D40, ESRRB,<br>EFEMP2, ACACA, TREX1,<br>MYLPF, TET1, FOXP2,<br>PRPSAP2, ADAP2, FREM1,<br>MTR, MZF1, SLC13A3,<br>ZFH2, IDI1, KLF1, ARSB,<br>PILRB2, ACVRL1, LDLR,<br>AGTPBP1, MMP28, GLI3,<br>SC4MOL, ZKSCAN4,<br>GM14391, PLCB4, STAC2,<br>PROZ, SETMAR, ITIH4,<br>ZFP354A, MICAL1,<br>ZC3HAV1L, RTEL1, ZFP354B,<br>ATP8B4, APCS, CAR14,<br>CYB5B, GMPR, PRKD2,<br>ZFP867, PKLR, CYP2A5,<br>ERN1, SPNA1, LEPREL1,<br>PRKD3, ZFP418, ZFP710,<br>ZFP395, SORD, ZFP715,<br>USP3, ZFP69, CD248,<br>ZFP398, TRIM14, PML,<br>TPCN2, DPF1, ZDHHC24,<br>NR1D1, TCEA3, ADH1, FASN,<br>ADAMTS10, PCSK9, KDM3A,<br>SLC39A5, XAF1, SCNN1A,<br>CAR1, THBS3, CHD3, CAR3,<br>CYP2G1, PM20D1, | 367 | 3885 | 13288 | 1.28612037 | 0.2064 | 0.109173 | 0.5611 |
| INTERPRO         | IPR008067:C<br>ytochrome<br>P450, E-<br>class, group<br>I, CYP2A-like | 4   | 0.67 | 4.46E-04 | CYP2G1, CYP2A22, CYP2C44,<br>CYP2A5                                                                                                                                                                                                                                                                                                                                                                                                                                                                                                                                                                                                                                                                                                                                                                                                                                                                                                                                                      | 513 | 6    | 17763 | 23.0838207 | 0.3341 | 0.183964 | 0.6944 |

|                  |                                                  |     |      |          |                                                                                                                                                                                                                                                                                                                                                                                                                                                                                                                                                                                                                                                                                                                                                                                                                                                                                     |     |      |       |            |        |          |        |
|------------------|--------------------------------------------------|-----|------|----------|-------------------------------------------------------------------------------------------------------------------------------------------------------------------------------------------------------------------------------------------------------------------------------------------------------------------------------------------------------------------------------------------------------------------------------------------------------------------------------------------------------------------------------------------------------------------------------------------------------------------------------------------------------------------------------------------------------------------------------------------------------------------------------------------------------------------------------------------------------------------------------------|-----|------|-------|------------|--------|----------|--------|
| GOTERM_MF<br>FAT | GO:0043167<br>ion binding                        | 139 | 23.4 | 4.54E-04 | CYP2D11, SYT3, CAR5A, SYT7, ATP2B2, MAP3K4, SLC25A23, RGN, ZFP831, ZFP882, DDAH1, SLC12A7, CYP2C55, NUDT13, NCALD, MYLK3, ACTN1, CYP2B13, TRIM35, PITPNM3, ZFP280D, PDE5A, PGCP, CYP2C44, SFXN4, ASAP1, ZFP456, ZFP455, GMIP, STAMBPL1, DHX58, FGD4, SGIP1, SCD1, AGBL3, SCD2, CYP2D40, ESRRB, EFEMP2, ACACA, TREX1, MYLPF, TET1, FOXP2, PRPSAP2, ADAP2, FREM1, MTR, MZF1, SLC13A3, ZFHX2, IDI1, KLF1, ARSB, PILRB2, ACVRL1, LDLR, AGTPBP1, MMP28, GLI3, SC4MOL, ZKSCAN4, GM14391, PLCB4, STAC2, PROZ, SETMAR, ITIH4, ZFP354A, MICAL1, ZC3HAV1L, RTEL1, ZFP354B, ATP8B4, APCS, CAR14, CYB5B, GMPR, PRKD2, ZFP867, PKLR, CYP2A5, ERN1, SPNA1, LEPREL1, PRKD3, ZFP418, ZFP710, ZFP395, SORD, ZFP715, USP3, ZFP69, CD248, ZFP398, TRIM14, PML, TPCN2, DPF1, ZDHHC24, NR1D1, TCEA3, ADH1, FASN, ADAMTS10, PCSK9, KDM3A, SLC39A5, XAF1, SCNN1A, CAR1, THBS3, CHD3, CAR3, CYP2G1, PM20D1, | 367 | 3934 | 13288 | 1.27930471 | 0.2414 | 0.087982 | 0.6701 |
| INTERPRO         | IPR017871:ABC transporter, conserved site        | 9   | 1.52 | 4.84E-04 | ABCG8, ABP1, ABCB9, ABCB1A, ABCD1, ABCA8A, ABCC4, ABCA2, ABCA3                                                                                                                                                                                                                                                                                                                                                                                                                                                                                                                                                                                                                                                                                                                                                                                                                      | 513 | 64   | 17763 | 4.86924342 | 0.3564 | 0.136623 | 0.7524 |
| GOTERM_BP<br>FAT | GO:0008202<br>steroid metabolic process          | 14  | 2.36 | 5.94E-04 | SREBF1, HSD3B2, LDLR, FDPS, ABCA2, LSS, AKR1C20, SC4MOL, AKR1C6, PCSK9, MVK, IDI1, AKR1D1, NSDHL                                                                                                                                                                                                                                                                                                                                                                                                                                                                                                                                                                                                                                                                                                                                                                                    | 381 | 161  | 13588 | 3.10122104 | 0.6576 | 0.300385 | 1.0035 |
| INTERPRO         | IPR003439:ABC transporter-like                   | 8   | 1.35 | 7.76E-04 | ABCG8, ABCB9, ABCB1A, ABCD1, ABCA8A, ABCC4, ABCA2, ABCA3                                                                                                                                                                                                                                                                                                                                                                                                                                                                                                                                                                                                                                                                                                                                                                                                                            | 513 | 53   | 17763 | 5.22652543 | 0.5069 | 0.162027 | 1.2044 |
| PIR_SUPERFAMILY  | PIRSF005552:guanine nucleotide-binding protein 1 | 4   | 0.67 | 8.63E-04 | GBP6, GBP10, GBP2, GBP1                                                                                                                                                                                                                                                                                                                                                                                                                                                                                                                                                                                                                                                                                                                                                                                                                                                             | 211 | 8    | 8136  | 19.2796209 | 0.1779 | 0.177896 | 1.0979 |
| INTERPRO         | IPR002401:Cytochrome P450, E-class, group I      | 9   | 1.52 | 8.87E-04 | CYP2G1, CYP2A22, CYP2C55, CYP2D40, CYP2C44, CYP2D11, CYP2A5, CYP4F14, CYP2B13                                                                                                                                                                                                                                                                                                                                                                                                                                                                                                                                                                                                                                                                                                                                                                                                       | 513 | 70   | 17763 | 4.4518797  | 0.5546 | 0.149362 | 1.3766 |

|                |                                                                                                                                                                                                         |    |      |          |                                                                                                                                                                  |     |     |       |            |        |          |        |
|----------------|---------------------------------------------------------------------------------------------------------------------------------------------------------------------------------------------------------|----|------|----------|------------------------------------------------------------------------------------------------------------------------------------------------------------------|-----|-----|-------|------------|--------|----------|--------|
| SP_PIR_KEYWORD | Steroid biosynthesis                                                                                                                                                                                    | 7  | 1.18 | 9.52E-04 | AKR1C6, FDPS, MVK, LSS, IDI1, SC4MOL, NSDHL                                                                                                                      | 518 | 40  | 17854 | 6.03175676 | 0.2841 | 0.080173 | 1.2946 |
| GOTERM_BP_FAT  | GO:0008610 ~lipid biosynthetic process                                                                                                                                                                  | 19 | 3.2  | 0.001125 | SCD1, HSD3B2, SCD2, ACACA, FDPS, LSS, GPAT2, AKR1C20, SC4MOL, AWAT2, FAR2, ACSM1, AKR1C6, FASN, MVK, ELOVL6, IDI1, AKR1D1, NSDHL                                 | 381 | 285 | 13588 | 2.3776028  | 0.869  | 0.398389 | 1.8947 |
| SP_PIR_KEYWORD | iron                                                                                                                                                                                                    | 21 | 3.54 | 0.001143 | CYP2G1, SCD1, CYP2C55, SCD2, CYP2D40, CYP2C44, CYP2D11, CYP2B13, SFXN4, CYP4F14, CYB5B, TET1, SC4MOL, CYP2A22, AOX1, CYP2A5, AOX3, KDM3A, LEPREL1, CYB5D1, RTEL1 | 518 | 321 | 17854 | 2.25486234 | 0.3307 | 0.077155 | 1.5528 |
| GOTERM_MF_FAT  | GO:0016712 ~oxidoreductase activity, acting on paired donors, with incorporation or reduction of molecular oxygen, reduced flavin or flavoprotein as one donor, and incorporation of one atom of oxygen | 7  | 1.18 | 0.001221 | CYP2G1, CYP2A22, CYP2C55, CYP2C44, CYP2D11, CYP2A5, CYP2B13                                                                                                      | 367 | 44  | 13288 | 5.76021798 | 0.5244 | 0.16954  | 1.7921 |
| GOTERM_MF_FAT  | GO:0005506 ~iron ion binding                                                                                                                                                                            | 21 | 3.54 | 0.001352 | CYP2G1, SCD1, CYP2C55, SCD2, CYP2D40, CYP2C44, CYP2D11, CYP2B13, SFXN4, CYP4F14, CYB5B, TET1, SC4MOL, CYP2A22, AOX1, CYP2A5, AOX3, KDM3A, LEPREL1, CYB5D1, RTEL1 | 367 | 343 | 13288 | 2.21676027 | 0.5608 | 0.151714 | 1.9821 |
| GOTERM_BP_FAT  | GO:0016125 ~sterol metabolic process                                                                                                                                                                    | 9  | 1.52 | 0.001359 | SREBF1, LDLR, FDPS, PCSK9, ABCA2, MVK, IDI1, SC4MOL, NSDHL                                                                                                       | 381 | 77  | 13588 | 4.16852439 | 0.9141 | 0.387912 | 2.2834 |

|                |                                                  |     |      |          |                                                                                                                                                                                                                                                                                                                                                                                                                                                                                                                                                                                                                                                                                                                                                                                                                                                                    |     |      |       |            |        |          |        |
|----------------|--------------------------------------------------|-----|------|----------|--------------------------------------------------------------------------------------------------------------------------------------------------------------------------------------------------------------------------------------------------------------------------------------------------------------------------------------------------------------------------------------------------------------------------------------------------------------------------------------------------------------------------------------------------------------------------------------------------------------------------------------------------------------------------------------------------------------------------------------------------------------------------------------------------------------------------------------------------------------------|-----|------|-------|------------|--------|----------|--------|
| SP_PIR_KEYWORD | glycoprotein                                     | 133 | 22.4 | 0.001563 | SLC44A3, AU040320, LTBP3, AQP8, LRTM1, BTC, TNFSF13, CD53, TLR7, KLHDC7A, GHRHR, OLFML3, BC018242, SLC2A2, S1PR5, VNN1, SLC4A3, SLC12A7, SLC22A23, TMEM132A, TMEM132E, SSTR2, CD37, RELT, ABCB1A, 6530402F18RIK, MST1R, PGCP, GLG1, AB124611, ABCA2, BDKRB2, SEMA5B, PVRL4, FOLR2, PVRL3, ICOS, OLFM1, FN1, PLAT, FKTN, CD8B1, EFEMP2, MET, CD300E, TNFRSF13C, HGF, FCGR1, SHANK2, LCN2, ABCG8, SEMA6A, GGT6, LAMA4, GGT7, LTB4R1, FREM1, SLC13A3, CHRD, COL20A1, ARSB, NRP2, PILRB2, NRP1, PODNL1, ACVRL1, LDLR, GYPA, LRRC19, SERPINA3F, PAX5, GABBR2, RAET1D, DNAJC16, SERPINA7, PROZ, SLC22A1, GPR97, PARM1, APCS, CAR14, CMKLR1, PRG4, IGFALS, CHST3, NFAM1, TMEM67, AMIGO3, CTSO, ERN1, NGFR, LEPREL1, FMOD, GPR183, HS3ST6, CSF1, CD248, ABCD1, GPR64, FPR1, CXCL9, COL27A1, UGT1A5, ADAMTS10, PCSK9, PKD1, SUCNR1, POPDC2, SLC39A5, SELPLG, SCNN1A, THBS3, | 518 | 3600 | 17854 | 1.27337087 | 0.4225 | 0.087447 | 2.1176 |
| INTERPRO       | IPR001849:Pieckstrin homology                    | 18  | 3.04 | 0.001573 | OBSCN, ASAP1, TECPR1, E130306D19RIK, PRKD2, PLEKHA6, PLEKHG2, ADAP2, DOK3, DOK4, DAPP1, FAM109B, DOK7, PHLDB2, ARAP2, PRKD3, PLEKHA2, FGD4                                                                                                                                                                                                                                                                                                                                                                                                                                                                                                                                                                                                                                                                                                                         | 513 | 261  | 17763 | 2.38798145 | 0.7617 | 0.212618 | 2.4279 |
| INTERPRO       | IPR003191:Guanilate-binding protein, C-terminal  | 4   | 0.67 | 0.001756 | GBP6, GBP10, GBP2, GBP1                                                                                                                                                                                                                                                                                                                                                                                                                                                                                                                                                                                                                                                                                                                                                                                                                                            | 513 | 9    | 17763 | 15.3892138 | 0.7984 | 0.20451  | 2.7073 |
| GOTERM_BP_FAT  | GO:0006633 ~fatty acid biosynthetic process      | 9   | 1.52 | 0.001886 | SCD1, AWAT2, FAR2, ACSM1, SCD2, FASN, ACACA, ELOVL6, SC4MOL                                                                                                                                                                                                                                                                                                                                                                                                                                                                                                                                                                                                                                                                                                                                                                                                        | 381 | 81   | 13588 | 3.96267133 | 0.9669 | 0.433292 | 3.156  |
| GOTERM_BP_FAT  | GO:0016053 ~organic acid biosynthetic process    | 12  | 2.02 | 0.002026 | SCD1, AWAT2, FAR2, ACSM1, SCD2, DHFR, MTR, FASN, ACACA, ELOVL6, AKR1D1, SC4MOL                                                                                                                                                                                                                                                                                                                                                                                                                                                                                                                                                                                                                                                                                                                                                                                     | 381 | 141  | 13588 | 3.03523762 | 0.9743 | 0.407207 | 3.3862 |
| GOTERM_BP_FAT  | GO:0046394 ~carboxylic acid biosynthetic process | 12  | 2.02 | 0.002026 | SCD1, AWAT2, FAR2, ACSM1, SCD2, DHFR, MTR, FASN, ACACA, ELOVL6, AKR1D1, SC4MOL                                                                                                                                                                                                                                                                                                                                                                                                                                                                                                                                                                                                                                                                                                                                                                                     | 381 | 141  | 13588 | 3.03523762 | 0.9743 | 0.407207 | 3.3862 |

|                 |                                                  |     |      |          |                                                                                                                                                                                                                                                                                                                                                                                                                                                                                                                                                                                                                                                                                                                                                                                                                                                                                      |     |      |       |            |        |          |        |
|-----------------|--------------------------------------------------|-----|------|----------|--------------------------------------------------------------------------------------------------------------------------------------------------------------------------------------------------------------------------------------------------------------------------------------------------------------------------------------------------------------------------------------------------------------------------------------------------------------------------------------------------------------------------------------------------------------------------------------------------------------------------------------------------------------------------------------------------------------------------------------------------------------------------------------------------------------------------------------------------------------------------------------|-----|------|-------|------------|--------|----------|--------|
| GOTERM_CC_FAT   | GO:0005626<br>~insoluble fraction                | 27  | 4.55 | 0.002079 | CYP2D11, BCAR1, PML, GHRHR, ATP2B2, PLCB4, FOLR2, RAC2, ANK3, UGT1A5, SCNN1A, CYP2C55, ANKRA2, MET, IGFALS, CYP4F14, CYB5B, BCL2L11, SLC10A1, LIN7A, CYP2A22, SSTR2, SQLE, CYP2A5, CYFIP2, ABCC4, SLC13A3                                                                                                                                                                                                                                                                                                                                                                                                                                                                                                                                                                                                                                                                            | 336 | 528  | 12504 | 1.90300325 | 0.437  | 0.436994 | 2.7086 |
| PIR_SUPERFAMILY | PIRSF000045<br>:cytochrome P450 CYP2D6           | 6   | 1.01 | 0.002146 | CYP2G1, CYP2A22, CYP2C55, CYP2D11, CYP2A5, CYP2B13                                                                                                                                                                                                                                                                                                                                                                                                                                                                                                                                                                                                                                                                                                                                                                                                                                   | 211 | 36   | 8136  | 6.42654028 | 0.3859 | 0.216338 | 2.7104 |
| SMART           | SM00233:PH                                       | 18  | 3.04 | 0.002199 | OBSCN, ASAP1, TECPR1, E130306D19RIK, PRKD2, PLEKHA6, PLEKHG2, ADAP2, DOK3, DOK4, DAPP1, FAM109B, DOK7, PHLDB2, ARAP2, PRKD3, PLEKHA2, FGD4                                                                                                                                                                                                                                                                                                                                                                                                                                                                                                                                                                                                                                                                                                                                           | 275 | 261  | 9131  | 2.28990596 | 0.3389 | 0.338852 | 2.6937 |
| INTERPRO        | IPR017973:C<br>ytochrome P450, C-terminal region | 9   | 1.52 | 0.002297 | CYP2G1, CYP2A22, CYP2C55, CYP2D40, CYP2C44, CYP2D11, CYP2A5, CYP4F14, CYP2B13                                                                                                                                                                                                                                                                                                                                                                                                                                                                                                                                                                                                                                                                                                                                                                                                        | 513 | 81   | 17763 | 3.84730344 | 0.8769 | 0.230381 | 3.5264 |
| UP_SEQ_FEATURE  | splice variant                                   | 168 | 28.3 | 0.002595 | ZC3HAV1, LTBP3, INO80, GPAT2, BC018242, MAP3K4, SBSN, SLC4A3, 1700029G01RIK, MATK, SLC12A7, MYLK3, SLC22A23, RBL1, MLXIPL, OLA1, WDR90, BCL2L11, LAT2, SSTR2, TRIM35, TNNT1, SGSM1, PITPNM3, ZFP280D, 6530402F18RIK, BMP2K, PGCP, TDRD3, AB124611, BBS7, A730008H23RIK, ASAP1, BDKRB2, DENND2C, SEMA5B, PVRL4, TRP53BP1, MEIS3, PDE6C, TTBK2, GMIP, SPATS2, PVRL3, CEP170, RCCD1, STAMBPL1, D330028D13RIK, OLFM1, 6030446N20RIK, FGD4, SGIP1, SREBF1, REEP6, OBSCN, AGBL3, ABCB9, CSTF2, AK1, TNFRSF13C, PPAPDC1B, ACACA, HACE1, HGF, SHANK2, CCDC158, MMAB, FOXP2, AWAT2, ABCG8, SEMA6A, GGT6, SAP130, FREM1, CCDC151, MYO19, RGS9, COL20A1, ARSB, NRP2, PRPH, POU6F1, ELF3, AGTPBP1, CDC14B, BCAR1, PION, BC052040, ACOT3, TTLL11, FAR2, SRPX, SERAC1, MFAP1B, HOMEZ, MTBP, SPIB, ZC3HAV1L, RTEL1, CCDC88B, SP100, FBXL21, PRG4, NUP88, ACNAT1, GPRASP1, SCAI, NUSAP1, LEF1, MPP7, | 500 | 4448 | 16021 | 1.21021942 | 0.9826 | 0.982628 | 4.2445 |

|               |                                                                                            |    |      |          |                                                                                                                                                                                                      |     |     |       |            |        |          |        |
|---------------|--------------------------------------------------------------------------------------------|----|------|----------|------------------------------------------------------------------------------------------------------------------------------------------------------------------------------------------------------|-----|-----|-------|------------|--------|----------|--------|
| GOTERM_CC_FAT | GO:0005624<br>~membrane fraction                                                           | 26 | 4.38 | 0.002631 | CYP2D11, BCAR1, GHRHR, ATP2B2, PLCB4, FOLR2, RAC2, ANK3, UGT1A5, SCNN1A, CYP2C55, ANKRA2, MET, IGFALS, CYP4F14, CYB5B, BCL2L11, SLC10A1, LIN7A, CYP2A22, SSTR2, SQLE, CYP2A5, CYFIP2, ABCC4, SLC13A3 | 336 | 510 | 12504 | 1.89719888 | 0.5167 | 0.304789 | 3.4158 |
| INTERPRO      | IPR000483:Cysteine-rich flanking region, C-terminal                                        | 9  | 1.52 | 0.00268  | FLRT1, LRRN4, GPR125, LRG1, LRTM1, LRRC19, IGFALS, PKD1, TLR7                                                                                                                                        | 513 | 83  | 17763 | 3.75459734 | 0.9132 | 0.237849 | 4.1026 |
| GOTERM_BP_FAT | GO:0030879<br>~mammary gland development                                                   | 9  | 1.52 | 0.002758 | ATP2B2, ELF3, CSF1, MET, PML, LEF1, GLI3, BCL2L11, GHRHR                                                                                                                                             | 381 | 86  | 13588 | 3.73228346 | 0.9932 | 0.463772 | 4.5836 |
| GOTERM_MF_FAT | GO:0046906<br>~tetrapyrrole binding                                                        | 12 | 2.02 | 0.003075 | CYP2G1, CYP2A22, CYP2C55, CYP2D40, CYP2C44, CYP2D11, MTR, CYP2A5, CYP4F14, CYP2B13, CYB5B, CYB5D1                                                                                                    | 367 | 151 | 13288 | 2.8773842  | 0.8463 | 0.268071 | 4.4544 |
| GOTERM_MF_FAT | GO:0016765<br>~transferase activity, transferring alkyl or aryl (other than methyl) groups | 7  | 1.18 | 0.003229 | CHML, MTR, FDPS, GSTT1, GSTT3, GSTM6, MMAB                                                                                                                                                           | 367 | 53  | 13288 | 4.78206776 | 0.86   | 0.244902 | 4.6725 |
| KEGG_PATHWAY  | mmu00830: Retinol metabolism                                                               | 8  | 1.35 | 0.003284 | AWAT2, CYP2A22, CYP2C55, CYP2C44, ADH1, UGT1A5, CYP2A5, CYP2B13                                                                                                                                      | 167 | 68  | 5738  | 4.0422684  | 0.3543 | 0.135694 | 3.7732 |
| GOTERM_BP_FAT | GO:0008203<br>~cholesterol metabolic process                                               | 8  | 1.35 | 0.00334  | SREBF1, LDLR, FDPS, PCSK9, ABCA2, MVK, IDI1, NSDHL                                                                                                                                                   | 381 | 70  | 13588 | 4.07589051 | 0.9976 | 0.488773 | 5.5245 |
| SMART         | SM00082:LR RCT                                                                             | 9  | 1.52 | 0.003341 | FLRT1, LRRN4, GPR125, LRG1, LRTM1, LRRC19, IGFALS, PKD1, TLR7                                                                                                                                        | 275 | 83  | 9131  | 3.6003943  | 0.467  | 0.26992  | 4.0673 |
| INTERPRO      | IPR001128:Cytochrome P450                                                                  | 9  | 1.52 | 0.003594 | CYP2G1, CYP2A22, CYP2C55, CYP2D40, CYP2C44, CYP2D11, CYP2A5, CYP4F14, CYP2B13                                                                                                                        | 513 | 87  | 17763 | 3.58197217 | 0.9624 | 0.279612 | 5.4654 |

|                   |                                                   |    |      |          |                                                                                                                                                                                                                                                                                                                                                                                                                                                                                                                                                                                                                                                                                                                                                                                                                                |     |      |       |            |        |          |        |
|-------------------|---------------------------------------------------|----|------|----------|--------------------------------------------------------------------------------------------------------------------------------------------------------------------------------------------------------------------------------------------------------------------------------------------------------------------------------------------------------------------------------------------------------------------------------------------------------------------------------------------------------------------------------------------------------------------------------------------------------------------------------------------------------------------------------------------------------------------------------------------------------------------------------------------------------------------------------|-----|------|-------|------------|--------|----------|--------|
| GOTERM_MF<br>_FAT | GO:0046914<br>~transition<br>metal ion<br>binding | 94 | 15.9 | 0.003633 | PRKD2, LEPREL1, ZFP1711,<br>AGTPBP1, CYP2D11, CAR5A,<br>MMP28, GLI3, ZKSCAN4,<br>SC4MOL, GM14391, STAC2,<br>SETMAR, ZFP354A, ZFP831,<br>MICAL1, ZC3HAV1L, ZFP882,<br>DDAH1, ZFP354B, RTEL1,<br>CYP2C55, CAR14, CYP2B13,<br>CYB5B, PRKD2, TRIM35,<br>ZFP867, ZFP280D, PDE5A,<br>CYP2A5, PGCP, LEPREL1,<br>PRKD3, ZFP710, ZFP418,<br>ZFP395, SORD, USP3,<br>ZFP715, CYP2C44, ZFP69,<br>ZFP398, TRIM14, PML,<br>ASAP1, SFXN4, ZFP456,<br>ZFP455, DPF1, ZDHHC24,<br>GMIP, NR1D1, TCEA3, ADH1,<br>FASN, STAMBPL1,<br>ADAMTS10, KDM3A,<br>SLC39A5, XAF1, CAR1,<br>DHX58, CAR3, FGD4, CHD3,<br>SGIP1, CYP2G1, SCD1,<br>AGBL3, SCD2, CYP2D40,<br>ESRRB, PM20D1,<br>4931406C07RIK, ACACA,<br>CYP4F14, XPNPEP3, TET1,<br>FOXP2, CYP2A22, ABP1,<br>ADAP2, ZFP182, MTR, AOX1,<br>ZFP7, MZF1, AOX3, LIME1,<br>ZFHX2, CYB5D1, KLF1,<br>ARAP2 | 367 | 2608 | 13288 | 1.30500995 | 0.8906 | 0.241678 | 5.2434 |
|-------------------|---------------------------------------------------|----|------|----------|--------------------------------------------------------------------------------------------------------------------------------------------------------------------------------------------------------------------------------------------------------------------------------------------------------------------------------------------------------------------------------------------------------------------------------------------------------------------------------------------------------------------------------------------------------------------------------------------------------------------------------------------------------------------------------------------------------------------------------------------------------------------------------------------------------------------------------|-----|------|-------|------------|--------|----------|--------|

|                     |                                                |     |      |          |                                                                                                                                                                                                                                                                                                                                                                                                                                                                                                                                                                                                                                                                                                                                                                                                                                                                                                                                                                                |     |      |       |            |        |          |        |
|---------------------|------------------------------------------------|-----|------|----------|--------------------------------------------------------------------------------------------------------------------------------------------------------------------------------------------------------------------------------------------------------------------------------------------------------------------------------------------------------------------------------------------------------------------------------------------------------------------------------------------------------------------------------------------------------------------------------------------------------------------------------------------------------------------------------------------------------------------------------------------------------------------------------------------------------------------------------------------------------------------------------------------------------------------------------------------------------------------------------|-----|------|-------|------------|--------|----------|--------|
| SP_PIR_KEYW<br>ORDS | membrane                                       | 189 | 31.9 | 0.003725 | AU040320, GPR125,<br>SLC44A3, AQP8, LRTM1,<br>CYP2D11, BTC, SYT3,<br>CD209F, INTS1, TNFSF13,<br>SYT7, CD53, GPAT2, TLR7,<br>KLHDC7A, GHRHR, SLC35A4,<br>ATP2B2, BC018242,<br>SLC25A23, SLC2A2, S1PR5,<br>SPRED3, VNN1, ELOVL6,<br>TMEM185B, SLC4A3,<br>TMEM14A, SLC12A7,<br>CYP2C55, GOLT1B, TMIE,<br>SLC22A23, TMEM132A,<br>TMEM132E, BCL2L11, RND2,<br>LAT2, SSTR2, CD37,<br>PITPNM3, RELT, ABCB1A,<br>6530402F18RIK,<br>TMEM184A, MST1R, GBP2,<br>GBP1, GLG1, AB124611,<br>TMEM199, BBS7, RABEPK,<br>SFXN4, ASAP1, ABCA2,<br>BDKRB2, ABCA3, SEMA5B,<br>PVRL4, PDE6C, FOLR2,<br>TTBK2, RAC2, PVRL3, ICOS,<br>SLC35F2, 6030446N20RIK,<br>BLNK, SREBF1, SCD1, REEP6,<br>ABCB9, PRAF2, FKTN, SCD2,<br>CD8B1, MAOA, MET,<br>DENND1A, CD300E,<br>TNFRSF13C, PPAPDC1B,<br>REEP1, SHANK2, FCGR1,<br>LIN7A, AWAT2, ABCG8,<br>SEMA6A, GGT6, GGT7,<br>ADAP2, FAM151A, LTB4R1,<br>SLC13A3, RGS9, PLEKHA2,<br>NRP2, GYPC, PILRB2, NRP1,<br>ACVRL1, CLDN4, LDLR,<br>GYPA, LRRC19, GABBR2, | 518 | 5507 | 17854 | 1.18291217 | 0.7301 | 0.170649 | 4.9776 |
| GOTERM_MF<br>FAT    | GO:0001883<br>~purine<br>nucleoside<br>binding | 61  | 10.3 | 0.003807 | KIFC2, XRCC3, ACVRL1,<br>LDHD, INO80, ATP2B2,<br>ACSS1, MAP3K4, DDX11,<br>OASL1, TARSL2, RTEL1,<br>ATP8B4, MATK, NLRP6,<br>NMNAT2, MYLK3, OLA1,<br>TYK2, PRKD2, PAPD4,<br>ABCB1A, SQLE, PDE5A, PKLR,<br>ERN1, GM6524, BMP2K,<br>MVK, MST1R, PRKD3, GBP1,<br>ABCD1, ABCA2, OAS2,<br>ABCA3, TTBK2, DCLK3,<br>DCLK2, DHX58, CHD3,<br>OBSCN, CHDH, ABCB9, AK1,<br>MET, ABCA8A, ACACA,<br>TREX1, BCS1L, NPR2, MMAB,<br>ABCG8, ACSM1, AOX1,<br>ABCC4, AOX3, GRK4,<br>MYO19, JAK3, PIP4K2A                                                                                                                                                                                                                                                                                                                                                                                                                                                                                            | 367 | 1548 | 13288 | 1.42676496 | 0.9016 | 0.227143 | 5.487  |
| SP_PIR_KEYW<br>ORDS | liver                                          | 5   | 0.84 | 0.003972 | AKR1C6, LTBP3, FABP1,<br>CAR5A, ORM2                                                                                                                                                                                                                                                                                                                                                                                                                                                                                                                                                                                                                                                                                                                                                                                                                                                                                                                                           | 518 | 23   | 17854 | 7.49286554 | 0.7527 | 0.160238 | 5.3005 |



|                 |                                                   |    |      |          |                                                                                                                                                                                                                                                                                                                                                                                                                               |     |      |       |            |        |          |        |
|-----------------|---------------------------------------------------|----|------|----------|-------------------------------------------------------------------------------------------------------------------------------------------------------------------------------------------------------------------------------------------------------------------------------------------------------------------------------------------------------------------------------------------------------------------------------|-----|------|-------|------------|--------|----------|--------|
| INTERPRO        | IPR017972:Cytochrome P450, conserved site         | 9  | 1.52 | 0.004133 | CYP2G1, CYP2A22, CYP2C55, CYP2D40, CYP2C44, CYP2D11, CYP2A5, CYP4F14, CYP2B13                                                                                                                                                                                                                                                                                                                                                 | 513 | 89   | 17763 | 3.50147842 | 0.977  | 0.290339 | 6.2607 |
| INTERPRO        | IPR003591:Luciferase-rich repeat, typical subtype | 11 | 1.85 | 0.004185 | FMOD, AMIGO3, FLRT1, PODNL1, LRRN4, GPR125, LRG1, LRTM1, IGFALS, PKD1, TLR7                                                                                                                                                                                                                                                                                                                                                   | 513 | 129  | 17763 | 2.95258171 | 0.9781 | 0.272693 | 6.3381 |
| GOTERM_MF_FAT   | GO:0001882 ~nucleoside binding                    | 61 | 10.3 | 0.00432  | KIFC2, XRCC3, ACVRL1, LDHD, INO80, ATP2B2, ACSS1, MAP3K4, DDX11, OASL1, TARSL2, RTEL1, ATP8B4, MATK, NLRP6, NMNAT2, MYLK3, OLA1, TYK2, PRKD2, PAPD4, ABCB1A, SQLE, PDE5A, PKLR, ERN1, GM6524, BMP2K, MVK, MST1R, PRKD3, GBP1, ABCD1, ABCA2, OAS2, ABCA3, TTBK2, DCLK3, DCLK2, DHX58, CHD3, OBSCN, CHDH, ABCB9, AK1, MET, ABCA8A, ACACA, TREX1, BCS1L, NPR2, MMAB, ABCG8, ACSM1, AOX1, ABCC4, AOX3, GRK4, MYO19, JAK3, PIP4K2A | 367 | 1558 | 13288 | 1.41760729 | 0.9281 | 0.231444 | 6.2053 |
| SP_PIR_KEYWORDS | sterol biosynthesis                               | 5  | 0.84 | 0.004659 | FDPS, MVK, IDI1, SC4MOL, NSDHL                                                                                                                                                                                                                                                                                                                                                                                                | 518 | 24   | 17854 | 7.18066281 | 0.8059 | 0.166514 | 6.1902 |
| SMART           | SM00369:LR_R_TYP                                  | 11 | 1.85 | 0.005356 | FMOD, AMIGO3, FLRT1, PODNL1, LRRN4, GPR125, LRG1, LRTM1, IGFALS, PKD1, TLR7                                                                                                                                                                                                                                                                                                                                                   | 275 | 129  | 9131  | 2.83131783 | 0.6356 | 0.285749 | 6.4454 |
| GOTERM_CC_FAT   | GO:0000267 ~cell fraction                         | 28 | 4.72 | 0.005404 | SORD, CYP2D11, BCAR1, PML, GHRHR, ATP2B2, PLCB4, RAC2, FOLR2, ANK3, UGT1A5, SCNN1A, CYP2C55, ANKRA2, MET, IGFALS, CYP4F14, CYB5B, BCL2L11, SLC10A1, LIN7A, CYP2A22, SSTR2, SQLE, CYP2A5, CYFIP2, ABCC4, SLC13A3                                                                                                                                                                                                               | 336 | 596  | 12504 | 1.74832215 | 0.7759 | 0.392556 | 6.899  |
| INTERPRO        | IPR015894:Guanylate-binding protein, N-terminal   | 4  | 0.67 | 0.005488 | GBP6, GBP10, GBP2, GBP1                                                                                                                                                                                                                                                                                                                                                                                                       | 513 | 13   | 17763 | 10.6540711 | 0.9934 | 0.319977 | 8.2325 |

|                 |                                          |    |      |          |                                                                                                                                                                                                                                                                                                                                                                                                                                                                                                                                                                                                                                                                                                                                         |     |      |       |            |        |          |        |
|-----------------|------------------------------------------|----|------|----------|-----------------------------------------------------------------------------------------------------------------------------------------------------------------------------------------------------------------------------------------------------------------------------------------------------------------------------------------------------------------------------------------------------------------------------------------------------------------------------------------------------------------------------------------------------------------------------------------------------------------------------------------------------------------------------------------------------------------------------------------|-----|------|-------|------------|--------|----------|--------|
| GOTERM_CC_FAT   | GO:0005886<br>~plasma membrane           | 99 | 16.7 | 0.005852 | GPR117, SLC30A1, GPR129, GABRB3, AQP8, BTC, SYT3, TNFSF13, SYT7, GHRHR, ATP2B2, SLC2A2, S1PR5, VNN1, SPRED3, ACTN1, RND2, SSTR2, LAT2, ABCB1A, RELT, 6530402F18RIK, MST1R, GBP2, GBP1, GLG1, BBS7, BDKRB2, ABCA3, PVRL4, PDE6C, FOLR2, ICOS, PVRL3, FN1, BLNK, CD8B1, AK1, MAOA, MET, TNFRSF13C, CD300E, DENND1A, FCGR1, SHANK2, LIN7A, ABCG8, ADAP2, LTB4R1, CYFIP2, KCTD18, RGS9, PLEKHA2, NRP2, GYPC, NRP1, CLDN4, BCAR1, GYPA, GABBR2, FAM57A, RAET1D, AP1S2, ITIH4, SLC22A1, GPR97, COL23A1, CMKLR1, MPP7, RFTN2, NFAM1, SLC9A3R1, TMEM67, DOK3, EVPL, DOK7, GM6524, KCTD12B, NGFR, GPR183, CD248, CSF1, GPR64, FPR1, UGT1A5, PKD1, SUCNR1, SLC39A5, SELPLG, SCNN1A, CNNM4, DLGAP3, SELL, ABCA8A, NPR2, GPR77, ABCC4, LIME1, GFRA2 | 336 | 2906 | 12504 | 1.26779569 | 0.8021 | 0.332998 | 7.4508 |
| GOTERM_MF_FAT   | GO:0020037<br>~heme binding              | 11 | 1.85 | 0.00652  | CYP2G1, CYP2A22, CYP2C55, CYP2D40, CYP2C44, CYP2D11, CYP2A5, CYP4F14, CYP2B13, CYB5B, CYB5D1                                                                                                                                                                                                                                                                                                                                                                                                                                                                                                                                                                                                                                            | 367 | 144  | 13288 | 2.76581895 | 0.9813 | 0.303398 | 9.2246 |
| PIR_SUPERFAMILY | PIRSF001392<br>:carbonate dehydratase    | 4  | 0.67 | 0.007405 | CAR14, CAR5A, CAR1, CAR3                                                                                                                                                                                                                                                                                                                                                                                                                                                                                                                                                                                                                                                                                                                | 211 | 16   | 8136  | 9.63981043 | 0.815  | 0.430166 | 9.071  |
| GOTERM_MF_FAT   | GO:0030554<br>~adenyl nucleotide binding | 59 | 9.95 | 0.007428 | LDHD, INO80, ATP2B2, ACSS1, MAP3K4, DDX11, OASL1, TARSL2, RTEL1, ATP8B4, MATK, NLRP6, NMNAT2, MYLK3, OLA1, TYK2, PRKD2, PAPD4, ABCB1A, SQLE, PKLR, ERN1, GM6524, BMP2K, MVK, MST1R, PRKD3, ABCD1, ABCA2, OAS2, ABCA3, TTBK2, DCLK3, DCLK2, DHX58, CHD3, OBSCN, CHDH, ABCB9, AK1, MET, ABCA8A, ACACA, TREX1, BCS1L, NPR2, MMAB, ABCG8, ACSM1, AOX1, ABCC4, AOX3, GRK4, MYO19, JAK3, PIP4K2A                                                                                                                                                                                                                                                                                                                                              | 367 | 1535 | 13288 | 1.39167295 | 0.9893 | 0.3146   | 10.445 |

|                |                                                              |    |      |          |                                                                                                                                                                                                                                                                                                                                                                                                                                                                                                                                                                                                                                                                                                                                                            |     |      |       |            |        |          |        |
|----------------|--------------------------------------------------------------|----|------|----------|------------------------------------------------------------------------------------------------------------------------------------------------------------------------------------------------------------------------------------------------------------------------------------------------------------------------------------------------------------------------------------------------------------------------------------------------------------------------------------------------------------------------------------------------------------------------------------------------------------------------------------------------------------------------------------------------------------------------------------------------------------|-----|------|-------|------------|--------|----------|--------|
| SP_PIR_KEYWORD | metal-binding                                                | 99 | 16.7 | 0.007876 | ZC3HAV1, CYP2D11, SYT3, CAR5A, SYT7, ATP2B2, MAP3K4, ZFP882, DDAH1, CYP2C55, CYP2B13, TRIM35, PITPNM3, ZFP280D, PDE5A, PGCP, CYP2C44, ASAP1, ZFP456, ZFP455, PDE6C, GMIP, STAMBPL1, DHX58, FGD4, SGIP1, AGBL3, CYP2D40, ESRRB, ACACA, FDPS, TET1, FOXP2, ADAP2, FREM1, MTR, MZF1, IDI1, KLF1, ARSB, PILRB2, ACVRL1, AGTPBP1, MMP28, GLI3, ZKSCAN4, STAC2, GM14391, ZFP354A, MICAL1, ZC3HAV1L, ZFP354B, RTEL1, APCS, CAR14, CYB5B, GMPR, PRKD2, ZFP867, PKLR, ERN1, CYP2A5, LEPREL1, PRKD3, ZFP710, ZFP418, SORD, USP3, ZFP715, ZFP69, ZFP398, TRIM14, PML, DPF1, ZDHHC24, NR1D1, TCEA3, ADH1, ADAMTS10, KDM3A, XAF1, CAR1, CHD3, CAR3, CYP2G1, PM20D1, 4931406C07RIK, CYP4F14, CYP2A22, ABP1, ACSM1, ZFP182, AOX1, ZFP7, SULF1, LIME1, AOX3, CYB5D1, ARAP2 | 518 | 2682 | 17854 | 1.27227851 | 0.9377 | 0.242352 | 10.254 |
| GOTERM_CC_FAT  | GO:0019898 ~extrinsic to membrane                            | 23 | 3.88 | 0.00829  | GNA14, CYP2C55, DLGAP3, ANKRA2, CYP2D11, DENND1A, CYP4F14, MPP7, SLC9A3R1, BCL2L11, LIN7A, CYP2A22, PITPNM3, DAPP1, MFAP1B, DOK7, CYP2A5, SPRED3, EPB4.1L4B, RGS9, JAK3, PHLDB2, PLEKHA2                                                                                                                                                                                                                                                                                                                                                                                                                                                                                                                                                                   | 336 | 472  | 12504 | 1.81340799 | 0.8995 | 0.368401 | 10.401 |
| INTERPRO       | IPR012675:Beta-grasp fold, ferredoxin-type                   | 4  | 0.67 | 0.008365 | AOX1, OLA1, AOX3, TARSL2                                                                                                                                                                                                                                                                                                                                                                                                                                                                                                                                                                                                                                                                                                                                   | 513 | 15   | 17763 | 9.23352827 | 0.9995 | 0.42109  | 12.291 |
| SP_PIR_KEYWORD | heme                                                         | 11 | 1.85 | 0.008394 | CYP2G1, CYP2A22, CYP2C55, CYP2D40, CYP2C44, CYP2D11, CYP2A5, CYP4F14, CYP2B13, CYB5B, CYB5D1                                                                                                                                                                                                                                                                                                                                                                                                                                                                                                                                                                                                                                                               | 518 | 142  | 17854 | 2.66999293 | 0.9481 | 0.235839 | 10.893 |
| GOTERM_BP_FAT  | GO:0016126 ~sterol biosynthetic process                      | 5  | 0.84 | 0.009284 | FDPS, MVK, IDI1, SC4MOL, NSDHL                                                                                                                                                                                                                                                                                                                                                                                                                                                                                                                                                                                                                                                                                                                             | 381 | 30   | 13588 | 5.944007   | 1      | 0.814306 | 14.654 |
| GOTERM_BP_FAT  | GO:0007167 ~enzyme linked receptor protein signaling pathway | 16 | 2.7  | 0.010038 | PLAT, ACVRL1, NRP1, NDN, LTBP3, BCAR1, MET, PML, HGF, DOK4, DCP1A, DOK7, MST1R, JAK3, FGF1, GFRA2                                                                                                                                                                                                                                                                                                                                                                                                                                                                                                                                                                                                                                                          | 381 | 273  | 13588 | 2.09020026 | 1      | 0.809002 | 15.75  |

|                    |                                                                              |    |      |          |                                                                                                                                                                                                       |     |     |       |            |        |          |        |
|--------------------|------------------------------------------------------------------------------|----|------|----------|-------------------------------------------------------------------------------------------------------------------------------------------------------------------------------------------------------|-----|-----|-------|------------|--------|----------|--------|
| INTERPRO           | IPR002345:Li<br>pocalin                                                      | 6  | 1.01 | 0.01011  | LCN2, ORM1, MEIS3,<br>GPRASP1, ABCA2, ORM2                                                                                                                                                            | 513 | 46  | 17763 | 4.51639969 | 0.9999 | 0.460507 | 14.669 |
| GOTERM_MF<br>_FAT  | GO:0009055<br>~electron<br>carrier<br>activity                               | 13 | 2.19 | 0.010304 | CYP2G1, HAO1, CYP2A22,<br>CYP2C55, CYP2D40,<br>CYP2C44, CYP2D11, MAOA,<br>AOX1, CYP2A5, CYP4F14,<br>AOX3, CYP2B13                                                                                     | 367 | 202 | 13288 | 2.3301589  | 0.9982 | 0.38395  | 14.209 |
| GOTERM_MF<br>_FAT  | GO:0005158<br>~insulin<br>receptor<br>binding                                | 4  | 0.67 | 0.010576 | DOK3, DOK4, SLC2A2, DOK7                                                                                                                                                                              | 367 | 17  | 13288 | 8.51931399 | 0.9984 | 0.369827 | 14.557 |
| UP_SEQ_FEA<br>TURE | domain:PH                                                                    | 14 | 2.36 | 0.010819 | OBSCN, ASAP1, TECPR1,<br>E130306D19RIK, PRKD2,<br>PLEKHG2, PLEKHA6, DOK3,<br>DAPP1, DOK4, FAM109B,<br>DOK7, PHLDB2, PRKD3                                                                             | 500 | 202 | 16021 | 2.22073267 | 1      | 0.999793 | 16.606 |
| KEGG_PATH<br>WAY   | mmu00980:<br>Metabolism<br>of<br>xenobiotics<br>by<br>cytochrome<br>P450     | 7  | 1.18 | 0.011606 | CYP2C55, CYP2C44, ADH1,<br>UGT1A5, GSTT1, CYP2B13,<br>GSTM6                                                                                                                                           | 167 | 66  | 5738  | 3.64416621 | 0.7883 | 0.321691 | 12.759 |
| GOTERM_CC<br>_FAT  | GO:0042995<br>~cell<br>projection                                            | 26 | 4.38 | 0.011628 | NRP2, PRPH, NRP1, BBS7,<br>GABRB3, BCAR1, ABI3,<br>GABBR2, GLI3, TTL11,<br>ATP2B2, NPHP4, IFT122,<br>PLCB4, SRPX, ANK3, SLC2A2,<br>PKD1, CYS1, FGD4, MET,<br>DENND1A, SHANK2,<br>SEMA6A, GM6524, GAMT | 336 | 575 | 12504 | 1.68273292 | 0.9604 | 0.416099 | 14.299 |
| INTERPRO           | IPR018338:C<br>armonic<br>anhydrase,<br>alpha-class,<br>conserved<br>site    | 4  | 0.67 | 0.011979 | CAR14, CAR5A, CAR1, CAR3                                                                                                                                                                              | 513 | 17  | 17763 | 8.14723082 | 1      | 0.496512 | 17.151 |
| KEGG_PATH<br>WAY   | mmu00100:S<br>teroid<br>biosynthesis                                         | 4  | 0.67 | 0.011996 | SQLE, LSS, SC4MOL, NSDHL                                                                                                                                                                              | 167 | 17  | 5738  | 8.08453681 | 0.7991 | 0.274595 | 13.161 |
| GOTERM_MF<br>_FAT  | GO:0004089<br>~carbonate<br>dehydratase<br>activity                          | 4  | 0.67 | 0.012437 | CAR14, CAR5A, CAR1, CAR3                                                                                                                                                                              | 367 | 18  | 13288 | 8.04601877 | 0.9995 | 0.397854 | 16.903 |
| COG_ONTO<br>LOGY   | Secondary<br>metabolites<br>biosynthesis,<br>transport,<br>and<br>catabolism | 10 | 1.69 | 0.012737 | CYP2G1, CYP2A22, CYP2C55,<br>CYP2D40, CYP2C44,<br>CYP4F17, CYP2D11, CYP2A5,<br>CYP4F14, CYP2B13                                                                                                       | 73  | 109 | 2040  | 2.56378032 | 0.2162 | 0.216162 | 9.1598 |
| INTERPRO           | IPR018159:S<br>pectrin/alph<br>a-actinin                                     | 5  | 0.84 | 0.012945 | BC024139, SYNE1, EVPL,<br>SPNA1, ACTN1                                                                                                                                                                | 513 | 32  | 17763 | 5.41027047 | 1      | 0.502544 | 18.407 |

|                 |                                                   |    |      |          |                                                                                                                                                                                                                                                                                                                                                                                                                                                                           |     |      |       |            |        |          |        |
|-----------------|---------------------------------------------------|----|------|----------|---------------------------------------------------------------------------------------------------------------------------------------------------------------------------------------------------------------------------------------------------------------------------------------------------------------------------------------------------------------------------------------------------------------------------------------------------------------------------|-----|------|-------|------------|--------|----------|--------|
| GOTERM_MF_FAT   | GO:0017076<br>~purine nucleotide binding          | 68 | 11.5 | 0.013111 | KIFC2, GNA14, XRCC3, ACVRL1, LDHD, INO80, ATP2B2, ACS1, MAP3K4, DDX11, OASL1, GBP10, TARSL2, RTEL1, ATP8B4, MATK, NLRP6, NMNAT2, GBP6, MYLK3, OLA1, TYK2, RND2, PRKD2, PAPD4, ABCB1A, SQLE, PDE5A, PKLR, GM6524, ERN1, BMP2K, MVK, MST1R, PRKD3, GBP2, GBP1, ABCD1, ABCA2, OAS2, ABCA3, TTBK2, RAC2, DCLK3, DCLK2, DHX58, CHD3, OBSCN, CHDH, ABCB9, IRGM2, AK1, MET, ABCA8A, ACACA, TREX1, BCS1L, NPR2, MMAB, ABCG8, ACSM1, AOX1, ABCC4, AOX3, GRK4, MYO19, JAK3, PIP4K2A | 367 | 1871 | 13288 | 1.31591755 | 0.9997 | 0.394397 | 17.74  |
| SP_PIR_KEYWORDS | Monoxygenase                                      | 9  | 1.52 | 0.013204 | CYP2G1, CYP2A22, CYP2C55, CYP2D40, CYP2C44, CYP2D11, CYP2A5, CYP4F14, CYP2B13                                                                                                                                                                                                                                                                                                                                                                                             | 518 | 108  | 17854 | 2.87226512 | 0.9906 | 0.322122 | 16.629 |
| GOTERM_BP_FAT   | GO:0006955<br>~immune response                    | 23 | 3.88 | 0.013205 | GPR183, ARCC4, GBP6, CD8B1, PRG4, CXCL9, CD300E, TNFRSF13C, SAMHD1, TNFSF13, OAS2, TLR7, FCGR1, TRAF3IP2, RAET1D, LAT2, OASL1, GBP10, VNN1, LIME1, DHX58, GBP2, GBP1                                                                                                                                                                                                                                                                                                      | 381 | 471  | 13588 | 1.74155619 | 1      | 0.864585 | 20.212 |
| SP_PIR_KEYWORDS | Cholesterol biosynthesis                          | 4  | 0.67 | 0.014248 | FDPS, MVK, IDI1, NSDHL                                                                                                                                                                                                                                                                                                                                                                                                                                                    | 518 | 18   | 17854 | 7.65937366 | 0.9935 | 0.321221 | 17.828 |
| GOTERM_BP_FAT   | GO:0055088<br>~lipid homeostasis                  | 5  | 0.84 | 0.014399 | ABCG8, LDLR, ACACA, PCSK9, ABCA2                                                                                                                                                                                                                                                                                                                                                                                                                                          | 381 | 34   | 13588 | 5.24471206 | 1      | 0.866523 | 21.838 |
| INTERPRO        | IPR001611:L<br>eucine-rich repeat                 | 13 | 2.19 | 0.014534 | FMOD, NLRC5, AMIGO3, FLRT1, PODNL1, LRRN4, GPR125, LRG1, LRTM1, LRRIC19, IGFALS, PKD1, TLR7                                                                                                                                                                                                                                                                                                                                                                               | 513 | 202  | 17763 | 2.22838863 | 1      | 0.523354 | 20.433 |
| SMART           | SM00150:SP<br>EC                                  | 5  | 0.84 | 0.014726 | BC024139, SYNE1, EVPL, SPNA1, ACTN1                                                                                                                                                                                                                                                                                                                                                                                                                                       | 275 | 32   | 9131  | 5.18806818 | 0.9385 | 0.502064 | 16.812 |
| GOTERM_CC_FAT   | GO:0044421<br>~extracellular region part          | 32 | 5.4  | 0.016222 | FMOD, PODNL1, LDLR, LTBP3, CSF1, BTC, CXCL9, TNFSF13, MMP28, SERAC1, COL27A1, MFAP1B, PCSK9, VNN1, ADAMTS10, FGF1, OLFM1, FN1, PLAT, LGALS1, EFEMP2, IGFALS, WNT2B, ORM1, ABP1, LAMA4, FREM1, 6530402F18RIK, SULF1, CHRDL1, COL20A1, ORM2                                                                                                                                                                                                                                 | 336 | 774  | 12504 | 1.53857512 | 0.989  | 0.475258 | 19.408 |
| INTERPRO        | IPR018170:A<br>Ido/keto reductase, conserved site | 4  | 0.67 | 0.01636  | AKR1C6, AKR1C19, AKR1D1, AKR1C20                                                                                                                                                                                                                                                                                                                                                                                                                                          | 513 | 19   | 17763 | 7.28962758 | 1      | 0.546566 | 22.704 |

|                    |                                                                                              |     |      |          |                                                                                                                                                                                                                                                                                                                                                                                                                                                                                                                                                                                                                                                                                                                                                                                                                                                                                                                                                                                                         |     |      |       |            |        |          |        |
|--------------------|----------------------------------------------------------------------------------------------|-----|------|----------|---------------------------------------------------------------------------------------------------------------------------------------------------------------------------------------------------------------------------------------------------------------------------------------------------------------------------------------------------------------------------------------------------------------------------------------------------------------------------------------------------------------------------------------------------------------------------------------------------------------------------------------------------------------------------------------------------------------------------------------------------------------------------------------------------------------------------------------------------------------------------------------------------------------------------------------------------------------------------------------------------------|-----|------|-------|------------|--------|----------|--------|
| INTERPRO           | IPR001148:C<br>arbo<br>nic<br>anhydrase,<br>alpha-class,<br>catalytic<br>domain              | 4   | 0.67 | 0.01636  | CAR14, CAR5A, CAR1, CAR3                                                                                                                                                                                                                                                                                                                                                                                                                                                                                                                                                                                                                                                                                                                                                                                                                                                                                                                                                                                | 513 | 19   | 17763 | 7.28962758 | 1      | 0.546566 | 22.704 |
| INTERPRO           | IPR000372:L<br>eucine-rich<br>repeat,<br>cysteine-rich<br>flanking<br>region, N-<br>terminal | 8   | 1.35 | 0.017902 | FMOD, AMIGO3, FLRT1,<br>PODNL1, LRTM1, IGFALS,<br>PKD1, TLR7                                                                                                                                                                                                                                                                                                                                                                                                                                                                                                                                                                                                                                                                                                                                                                                                                                                                                                                                            | 513 | 93   | 17763 | 2.9785575  | 1      | 0.560816 | 24.574 |
| UP_SEQ_FEAT<br>URE | glycosylation<br>site:N-linked<br>(GlcNAc...)                                                | 128 | 21.6 | 0.018267 | SLC44A3, AU040320, LTBP3,<br>AQP8, LRTM1, BTC,<br>TNFSF13, CD53, TLR7,<br>KLHDC7A, GHRHR, OLFML3,<br>BC018242, SLC2A2, S1PR5,<br>VNN1, SLC4A3, SLC12A7,<br>SLC22A23, TMEM132A,<br>TMEM132E, SSTR2, CD37,<br>RELT, ABCB1A,<br>6530402F18RIK, MST1R,<br>PGCP, GLG1, AB124611,<br>ABCA2, BDKRB2, PVRL4,<br>SEMA5B, FOLR2, PVRL3,<br>ICOS, OLFM1, FN1, PLAT,<br>FKTN, CD8B1, EFEMP2, MET,<br>TNFRSF13C, CD300E, HGF,<br>FCGR1, LCN2, ABCG8,<br>SEMA6A, GGT6, LAMA4,<br>GGT7, LTB4R1, FREM1,<br>SLC13A3, CHRDL, COL20A1,<br>NRP2, ARSB, PILRB2, NRP1,<br>PODNL1, ACVRL1, LDLR,<br>LRRC19, SERPINA3F,<br>GABBR2, RAET1D, DNAJC16,<br>SERPINA7, PROZ, SLC22A1,<br>GPR97, PARM1, APCS,<br>CAR14, CMKLR1, PRG4,<br>IGFALS, CHST3, NFAM1,<br>TMEM67, AMIGO3, CTSO,<br>ERN1, NGFR, LEPREL1,<br>FMOD, GPR183, HS3ST6,<br>CSF1, ABCD1, GPR64, FPR1,<br>CXCL9, COL27A1, UGT1A5,<br>ADAMTS10, PCSK9, PKD1,<br>SUCNR1, POPDC2, SLC39A5,<br>SELPLG, SCNN1A, THBS3,<br>CNNM4, TMC8, LRRN4, SELL,<br>ABCA8A, PM20D1, NPR2, | 500 | 3444 | 16021 | 1.19087573 | 1      | 0.999931 | 26.492 |
| KEGG_PATH<br>WAY   | mmu05340:<br>Primary<br>immunodeficiency                                                     | 5   | 0.84 | 0.019357 | CD8B1, ICOS, TNFRSF13C,<br>JAK3, BLNK                                                                                                                                                                                                                                                                                                                                                                                                                                                                                                                                                                                                                                                                                                                                                                                                                                                                                                                                                                   | 167 | 36   | 5738  | 4.77212242 | 0.9257 | 0.35162  | 20.431 |
| GOTERM_CC<br>FAT   | GO:0031012<br>~extracellular<br>matrix                                                       | 16  | 2.7  | 0.019398 | FMOD, PODNL1, LTBP3,<br>EFEMP2, LGALS1, MMP28,<br>WNT2B, LAMA4, SERAC1,<br>FREM1, COL27A1, MFAP1B,<br>6530402F18RIK, ADAMTS10,<br>FGF1, FN1                                                                                                                                                                                                                                                                                                                                                                                                                                                                                                                                                                                                                                                                                                                                                                                                                                                             | 336 | 309  | 12504 | 1.92695331 | 0.9955 | 0.491258 | 22.774 |

|                 |                                                 |    |      |          |                                                                                                                                                                                                                                                                                                                                                       |     |      |       |            |        |          |        |
|-----------------|-------------------------------------------------|----|------|----------|-------------------------------------------------------------------------------------------------------------------------------------------------------------------------------------------------------------------------------------------------------------------------------------------------------------------------------------------------------|-----|------|-------|------------|--------|----------|--------|
| GOTERM_CC_FAT   | GO:0005792<br>~microsome                        | 11 | 1.85 | 0.020192 | ATP2B2, CYP2A22, CYP2C55, PLCB4, SQLE, CYP2D11, UGT1A5, CYP2A5, CYP4F14, IGFALS, CYB5B                                                                                                                                                                                                                                                                | 336 | 176  | 12504 | 2.32589286 | 0.9964 | 0.465039 | 23.595 |
| INTERPRO        | IPR016167:F<br>AD-binding, type 2, subdomain 1  | 3  | 0.51 | 0.020691 | LDHD, AOX1, AOX3                                                                                                                                                                                                                                                                                                                                      | 513 | 8    | 17763 | 12.9846491 | 1      | 0.596271 | 27.849 |
| GOTERM_MF_FAT   | GO:0008047<br>~enzyme activator activity        | 14 | 2.36 | 0.020871 | ASAP1, FGF13, CYB5B, ARHGAP30, ADAP2, SGSM1, GMIP, CHML, TBC1D4, RGS9, SH3BP1, ARAP2, ADC, FN1                                                                                                                                                                                                                                                        | 367 | 249  | 13288 | 2.03573969 | 1      | 0.529687 | 26.808 |
| SP_PIR_KEYWORDS | hydro-lyase                                     | 3  | 0.51 | 0.020872 | CAR5A, CAR1, CAR3                                                                                                                                                                                                                                                                                                                                     | 518 | 8    | 17854 | 12.9251931 | 0.9994 | 0.410701 | 25.069 |
| GOTERM_BP_FAT   | GO:0007050<br>~cell cycle arrest                | 6  | 1.01 | 0.021249 | BC024139, AK1, PML, MTBP, ERN1, PKD1                                                                                                                                                                                                                                                                                                                  | 381 | 57   | 13588 | 3.75410968 | 1      | 0.93728  | 30.57  |
| SMART           | SM00013:LR<br>RNT                               | 8  | 1.35 | 0.02147  | FMOD, AMIGO3, FLRT1, PODNL1, LRTM1, IGFALS, PKD1, TLR7                                                                                                                                                                                                                                                                                                | 275 | 93   | 9131  | 2.85622678 | 0.9831 | 0.557824 | 23.606 |
| GOTERM_MF_FAT   | GO:0016887<br>~ATPase activity                  | 15 | 2.53 | 0.023773 | XRCC3, ABCB9, ABCD1, ABCA8A, INO80, ABCA2, ABCA3, ABCG8, ATP2B2, DDX11, ABCB1A, GM6524, ABCC4, RTEL1, ATP8B4                                                                                                                                                                                                                                          | 367 | 281  | 13288 | 1.93276252 | 1      | 0.556341 | 29.952 |
| INTERPRO        | IPR001395:A<br>ldo/keto reductase               | 4  | 0.67 | 0.0244   | AKR1C6, AKR1C19, AKR1D1, AKR1C20                                                                                                                                                                                                                                                                                                                      | 513 | 22   | 17763 | 6.29558745 | 1      | 0.640453 | 31.999 |
| GOTERM_CC_FAT   | GO:0042598<br>~vesicular fraction               | 11 | 1.85 | 0.024799 | ATP2B2, CYP2A22, CYP2C55, PLCB4, SQLE, CYP2D11, UGT1A5, CYP2A5, CYP4F14, IGFALS, CYB5B                                                                                                                                                                                                                                                                | 336 | 182  | 12504 | 2.24921507 | 0.999  | 0.499961 | 28.2   |
| GOTERM_BP_FAT   | GO:0006695<br>~cholesterol biosynthetic process | 4  | 0.67 | 0.025382 | FDPS, MVK, IDI1, NSDHL                                                                                                                                                                                                                                                                                                                                | 381 | 23   | 13588 | 6.20244209 | 1      | 0.954668 | 35.386 |
| GOTERM_MF_FAT   | GO:0005524<br>~ATP binding                      | 53 | 8.94 | 0.025893 | INO80, ATP2B2, ACSS1, MAP3K4, DDX11, OASL1, TARSL2, RTEL1, MATK, ATP8B4, NLRP6, NMNAT2, MYLK3, OLA1, TYK2, PRKD2, PAPD4, ABCB1A, PKLR, ERN1, GM6524, BMP2K, MVK, MST1R, PRKD3, ABCD1, ABCA2, OAS2, ABCA3, TTBK2, DCLK3, DCLK2, DHX58, CHD3, OBSCN, ABCB9, AK1, ABCA8A, MET, ACACA, BCS1L, NPR2, MMAB, ABCG8, ACSM1, ABCC4, GRK4, JAK3, MYO19, PIP4K2A | 367 | 1443 | 13288 | 1.32985134 | 1      | 0.568066 | 32.169 |
| GOTERM_CC_FAT   | GO:0030863<br>~cortical cytoskeleton            | 5  | 0.84 | 0.027497 | GYPC, SPNA1, ACTN1, SCNN1A, EPB4.9                                                                                                                                                                                                                                                                                                                    | 336 | 43   | 12504 | 4.32724252 | 0.9995 | 0.503212 | 30.778 |

|                 |                                                           |    |      |          |                                                                                                                                                                                                                                                                                                                                                      |     |      |       |            |        |          |        |
|-----------------|-----------------------------------------------------------|----|------|----------|------------------------------------------------------------------------------------------------------------------------------------------------------------------------------------------------------------------------------------------------------------------------------------------------------------------------------------------------------|-----|------|-------|------------|--------|----------|--------|
| KEGG_PATHWAY    | mmu00910: Nitrogen metabolism                             | 4  | 0.67 | 0.027535 | CAR14, CAR5A, CAR1, CAR3                                                                                                                                                                                                                                                                                                                             | 167 | 23   | 5738  | 5.97552721 | 0.9756 | 0.411696 | 27.854 |
| GOTERM_MF_FAT   | GO:0016836 ~hydro-lyase activity                          | 5  | 0.84 | 0.027836 | CAR14, FASN, CAR5A, CAR1, CAR3                                                                                                                                                                                                                                                                                                                       | 367 | 42   | 13288 | 4.3103672  | 1      | 0.576086 | 34.144 |
| GOTERM_BP_FAT   | GO:0006749 ~glutathione metabolic process                 | 4  | 0.67 | 0.028422 | GGT6, GGT7, GSTT1, GSTT3                                                                                                                                                                                                                                                                                                                             | 381 | 24   | 13588 | 5.944007   | 1      | 0.961333 | 38.725 |
| GOTERM_CC_FAT   | GO:0005578 ~proteinaceous extracellular matrix            | 15 | 2.53 | 0.029411 | FMOD, PODNL1, LTBP3, EFEMP2, LGALS1, MMP28, WNT2B, LAMA4, FREM1, COL27A1, MFAP1B, 6530402F18RIK, ADAMTS10, FGF1, FN1                                                                                                                                                                                                                                 | 336 | 297  | 12504 | 1.87950938 | 0.9997 | 0.49671  | 32.553 |
| GOTERM_MF_FAT   | GO:0030246 ~carbohydrate binding                          | 16 | 2.7  | 0.030003 | GLG1, APCS, PRG4, LGALS4, SELL, LGALS1, CD248, CD209F, ABP1, FREM1, ITIH4, PKD1, FGF1, CHRDL, SELPLG, FN1                                                                                                                                                                                                                                            | 367 | 317  | 13288 | 1.82748691 | 1      | 0.586026 | 36.283 |
| SP_PIR_KEYWORDS | SH2 domain                                                | 8  | 1.35 | 0.030047 | TYK2, DAPP1, SH2D5, JAK3, STAT1, BLNK, MATK, STAT2                                                                                                                                                                                                                                                                                                   | 518 | 103  | 17854 | 2.67706264 | 1      | 0.510265 | 34.126 |
| SP_PIR_KEYWORDS | Flavoprotein                                              | 8  | 1.35 | 0.030047 | HAO1, CHDH, SQLE, PYROXD1, MAOA, LDHD, AOX1, MICAL1                                                                                                                                                                                                                                                                                                  | 518 | 103  | 17854 | 2.67706264 | 1      | 0.510265 | 34.126 |
| BIOCARTA        | m_ifnaPathway:IFN alpha signaling pathway                 | 3  | 0.51 | 0.030667 | TYK2, STAT1, STAT2                                                                                                                                                                                                                                                                                                                                   | 43  | 8    | 1171  | 10.2122093 | 0.9033 | 0.903289 | 27.884 |
| GOTERM_BP_FAT   | GO:0046578 ~regulation of Ras protein signal transduction | 11 | 1.85 | 0.031056 | OBSCN, PLEKHG2, SGSM1, ADAP2, CSF1, SCAI, TBC1D4, ASAP1, E130306D19RIK, ARAP2, FGD4                                                                                                                                                                                                                                                                  | 381 | 181  | 13588 | 2.16742797 | 1      | 0.964906 | 41.487 |
| GOTERM_MF_FAT   | GO:0032559 ~adenyl ribonucleotide binding                 | 53 | 8.94 | 0.031358 | INO80, ATP2B2, ACS1, MAP3K4, DDX11, OASL1, TARSL2, RTEL1, MATK, ATP8B4, NLRP6, NMNAT2, MYLK3, OLA1, TYK2, PRKD2, PAPD4, ABCB1A, PKLR, ERN1, GM6524, BMP2K, MVK, MST1R, PRKD3, ABCD1, ABCA2, OAS2, ABCA3, TTBK2, DCLK3, DCLK2, DHX58, CHD3, OBSCN, ABCB9, AK1, ABCA8A, MET, ACACA, BCS1L, NPR2, MMAB, ABCG8, ACSM1, ABCC4, GRK4, JAK3, MYO19, PIP4K2A | 367 | 1460 | 13288 | 1.31436676 | 1      | 0.585427 | 37.588 |
| UP_SEQ_FEATURE  | domain:SH3                                                | 11 | 1.85 | 0.0316   | OBSCN, STAC2, BCAR1, ABI3, SPNA1, ASAP1, PPP1R13B, MPP7, SHANK2, 1700029G01RIK, MATK                                                                                                                                                                                                                                                                 | 500 | 163  | 16021 | 2.16234356 | 1      | 0.999996 | 41.494 |
| INTERPRO        | IPRO16166:FAD-binding, type 2                             | 3  | 0.51 | 0.032012 | LDHD, AOX1, AOX3                                                                                                                                                                                                                                                                                                                                     | 513 | 10   | 17763 | 10.3877193 | 1      | 0.72437  | 39.827 |



|                 |                                                               |    |      |          |                                                                                                                  |     |     |       |            |        |          |        |
|-----------------|---------------------------------------------------------------|----|------|----------|------------------------------------------------------------------------------------------------------------------|-----|-----|-------|------------|--------|----------|--------|
| GOTERM_BP_FAT   | GO:0051186<br>~cofactor metabolic process                     | 11 | 1.85 | 0.03208  | NMNAT2, ACS1, GGT6, GGT7, ACNAT1, MTR, GSTT1, SPNA1, GSTT3, MMAB, ACOT3                                          | 381 | 182 | 13588 | 2.15551902 | 1      | 0.961982 | 42.529 |
| SP_PIR_KEYWORDS | carbon-oxygen lyase                                           | 3  | 0.51 | 0.032286 | CAR5A, CAR1, CAR3                                                                                                | 518 | 10  | 17854 | 10.3401544 | 1      | 0.513229 | 36.176 |
| SP_PIR_KEYWORDS | Pyrrolidone carboxylic acid                                   | 5  | 0.84 | 0.032686 | FMOD, RNASE4, HGF, SELPLG, FN1                                                                                   | 518 | 42  | 17854 | 4.10323589 | 1      | 0.496485 | 36.536 |
| GOTERM_BP_FAT   | GO:0006631<br>~fatty acid metabolic process                   | 11 | 1.85 | 0.0342   | SCD1, AWAT2, FAR2, ACSM1, SCD2, ACNAT1, FASN, ACACA, ELOVL6, SC4MOL, ACOT3                                       | 381 | 184 | 13588 | 2.13208947 | 1      | 0.963331 | 44.629 |
| GOTERM_BP_FAT   | GO:0055092<br>~sterol homeostasis                             | 4  | 0.67 | 0.035052 | ABCG8, LDLR, PCSK9, ABCA2                                                                                        | 381 | 26  | 13588 | 5.48677569 | 1      | 0.960053 | 45.454 |
| GOTERM_BP_FAT   | GO:0042632<br>~cholesterol homeostasis                        | 4  | 0.67 | 0.035052 | ABCG8, LDLR, PCSK9, ABCA2                                                                                        | 381 | 26  | 13588 | 5.48677569 | 1      | 0.960053 | 45.454 |
| GOTERM_CC_FAT   | GO:0009986<br>~cell surface                                   | 15 | 2.53 | 0.035292 | COL23A1, CD8B1, ACVRL1, GPR125, SELL, GYPA, TNFRSF13C, TNFSF13, NFAM1, FCGR1, GHRHR, RAET1D, ICOS, SULF1, SCNN1A | 336 | 305 | 12504 | 1.83021077 | 1      | 0.533648 | 37.75  |
| GOTERM_BP_FAT   | GO:0000904<br>~cell morphogenesis involved in differentiation | 12 | 2.02 | 0.036291 | SEMA6A, ATP2B2, NRP1, NDN, ESRRB, ANK3, 6530402F18RIK, LEF1, NGFR, GLI3, NFATC1, NUMBL                           | 381 | 212 | 13588 | 2.01871936 | 1      | 0.958302 | 46.631 |
| UP_SEQ_FEATURE  | short sequence motif:Histidine box-2                          | 3  | 0.51 | 0.036919 | SCD1, SCD2, SC4MOL                                                                                               | 500 | 10  | 16021 | 9.6126     | 1      | 0.999992 | 46.634 |
| UP_SEQ_FEATURE  | short sequence motif:Histidine box-1                          | 3  | 0.51 | 0.036919 | SCD1, SCD2, SC4MOL                                                                                               | 500 | 10  | 16021 | 9.6126     | 1      | 0.999992 | 46.634 |
| UP_SEQ_FEATURE  | short sequence motif:Histidine box-3                          | 3  | 0.51 | 0.036919 | SCD1, SCD2, SC4MOL                                                                                               | 500 | 10  | 16021 | 9.6126     | 1      | 0.999992 | 46.634 |
| INTERPRO        | IPR000980:S H2 motif                                          | 8  | 1.35 | 0.041592 | TYK2, DAPP1, SH2D5, JAK3, STAT1, BLNK, MATK, STAT2                                                               | 513 | 111 | 17763 | 2.49554818 | 1      | 0.800618 | 48.481 |
| INTERPRO        | IPR017940:ABC transporter integral membrane type 1            | 4  | 0.67 | 0.041716 | ABCB9, ABCB1A, ABCD1, ABCC4                                                                                      | 513 | 27  | 17763 | 5.12973793 | 1      | 0.788337 | 48.585 |
| KEGG_PATHWAY    | mmu01040: Biosynthesis of unsaturated fatty acids             | 4  | 0.67 | 0.041831 | SCD1, SCD2, ELOVL6, ACOT3                                                                                        | 167 | 27  | 5738  | 5.09026392 | 0.9966 | 0.508558 | 39.326 |
| SP_PIR_KEYWORDS | immune response                                               | 11 | 1.85 | 0.042011 | GPR183, LAT2, CD8B1, CD300E, TNFRSF13C, SAMHD1, LIME1, TNFSF13, TLR7, FCGR1, DHX58                               | 518 | 184 | 17854 | 2.06053802 | 1      | 0.566959 | 44.414 |

|                 |                                                                                 |    |      |          |                                                                                                                                                                                                                                                                                                                             |     |      |       |            |   |          |        |
|-----------------|---------------------------------------------------------------------------------|----|------|----------|-----------------------------------------------------------------------------------------------------------------------------------------------------------------------------------------------------------------------------------------------------------------------------------------------------------------------------|-----|------|-------|------------|---|----------|--------|
| GOTERM_BP_FAT   | GO:0051188<br>~cofactor biosynthetic process                                    | 7  | 1.18 | 0.042104 | NMNAT2, ACS1, GGT6, GGT7, MTR, SPNA1, MMAB                                                                                                                                                                                                                                                                                  | 381 | 91   | 13588 | 2.74338785 | 1 | 0.970674 | 51.844 |
| SP_PIR_KEYWORDS | electron transfer                                                               | 4  | 0.67 | 0.042199 | CYP2A22, CYP2D11, CYP2A5, CYP2B13                                                                                                                                                                                                                                                                                           | 518 | 27   | 17854 | 5.10624911 | 1 | 0.549094 | 44.563 |
| SP_PIR_KEYWORDS | atp-binding                                                                     | 49 | 8.26 | 0.042485 | ABCD1, INO80, ABCA2, ABCA3, ATP2B2, ACS1, MAP3K4, TTBK2, DDX11, DCLK3, DCLK2, TARSL2, DHX58, RTEL1, MATK, ATP8B4, OBSCN, NLRP6, NMNAT2, ABCB9, MYLK3, AK1, MET, ABCA8A, ACACA, OLA1, BCS1L, MMAB, TYK2, ABCG8, PRKD2, ACSM1, PAPD4, ABCB1A, PKLR, BMP2K, ERN1, GM6524, ABCC4, GRK4, MVK, MST1R, MYO19, JAK3, PIP4K2A, PRKD3 | 518 | 1287 | 17854 | 1.31227031 | 1 | 0.533228 | 44.789 |
| SP_PIR_KEYWORDS | Fatty acid biosynthesis                                                         | 5  | 0.84 | 0.043587 | SCD1, SCD2, FASN, ACACA, ELOVL6                                                                                                                                                                                                                                                                                             | 518 | 46   | 17854 | 3.74643277 | 1 | 0.525211 | 45.653 |
| GOTERM_BP_FAT   | GO:0007169<br>~transmembrane receptor protein tyrosine kinase signaling pathway | 11 | 1.85 | 0.043666 | PLAT, NRP1, DOK4, NDN, BCAR1, MET, DOK7, HGF, MST1R, FGF1, GFRA2                                                                                                                                                                                                                                                            | 381 | 192  | 13588 | 2.04325241 | 1 | 0.96992  | 53.16  |
| GOTERM_BP_FAT   | GO:0006575<br>~cellular amino acid derivative metabolic process                 | 9  | 1.52 | 0.044477 | CHDH, ATP2B2, GGT6, GGT7, MAOA, GSST1, GAMT, GSST3, ADC                                                                                                                                                                                                                                                                     | 381 | 141  | 13588 | 2.27642821 | 1 | 0.967344 | 53.831 |
| GOTERM_MF_FAT   | GO:0016229<br>~steroid dehydrogenase activity                                   | 4  | 0.67 | 0.044634 | HSD3B2, AKR1C6, AKR1D1, NSDHL                                                                                                                                                                                                                                                                                               | 367 | 29   | 13288 | 4.99408062 | 1 | 0.700913 | 49.114 |
| GOTERM_BP_FAT   | GO:0042398<br>~cellular amino acid derivative biosynthetic process              | 5  | 0.84 | 0.044656 | CHDH, GGT6, GGT7, GAMT, ADC                                                                                                                                                                                                                                                                                                 | 381 | 48   | 13588 | 3.71500437 | 1 | 0.963057 | 53.978 |

|                 |                                           |     |      |          |                                                                                                                                                                                                                                                                                                                                                                                                                                                                                                                                                                                                                                                                                                                                                                                                                                                                               |     |      |       |            |   |          |        |
|-----------------|-------------------------------------------|-----|------|----------|-------------------------------------------------------------------------------------------------------------------------------------------------------------------------------------------------------------------------------------------------------------------------------------------------------------------------------------------------------------------------------------------------------------------------------------------------------------------------------------------------------------------------------------------------------------------------------------------------------------------------------------------------------------------------------------------------------------------------------------------------------------------------------------------------------------------------------------------------------------------------------|-----|------|-------|------------|---|----------|--------|
| UP_SEQ_FEATURE  | transmembrane region                      | 146 | 24.6 | 0.045244 | SLC44A3, AU040320, AQP8, LRTM1, BTC, SYT3, INTS1, TNFSF13, SYT7, CD53, GPAT2, TLR7, KLHDC7A, GHRHR, SLC35A4, ATP2B2, BC018242, SLC25A23, SLC2A2, S1PR5, ELOVL6, TMEM185B, SLC4A3, TMEM14A, SLC12A7, GOLT1B, TMIE, SLC22A23, TMEM132A, TMEM132E, LAT2, SSTR2, CD37, RELT, ABCB1A, TMEM184A, MST1R, GLG1, AB124611, TMEM199, SFXN4, ABCA2, BDKRB2, ABCA3, SEMA5B, PVRL4, TTBK2, PVRL3, ICOS, SLC35F2, 6030446N20RIK, SREBF1, SCD1, REEP6, ABCB9, FKTN, PRAF2, SCD2, CD8B1, MAOA, MET, CD300E, TNFRSF13C, PPAPDC1B, REEP1, FCGR1, AWAT2, ABCG8, SEMA6A, GGT6, GGT7, LTB4R1, FAM151A, SLC13A3, NRP2, GYPC, PILRB2, NRP1, ACVRL1, CLDN4, LDLR, GYPA, LRRC19, GABBR2, FAM57A, SC4MOL, FAR2, DNAJC16, FITM1, SERAC1, SLC22A1, GPR97, PARM1, COL23A1, CAR14, CMKLR1, SCAI, CHST3, NFAM1, CYB5B, TMEM67, AMIGO3, SLC35E4, TLCD2, SQLE, ERN1, NGFR, CUX1, HSD3B2, GPR183, HS3ST6, CSF1, | 500 | 4113 | 16021 | 1.13740141 | 1 | 0.999994 | 53.834 |
| SP_PIR_KEYWORDS | sialic acid                               | 3   | 0.51 | 0.045586 | GLG1, GYPA, SELPLG                                                                                                                                                                                                                                                                                                                                                                                                                                                                                                                                                                                                                                                                                                                                                                                                                                                            | 518 | 12   | 17854 | 8.61679537 | 1 | 0.524983 | 47.186 |
| INTERPRO        | IPR003593:ATPase, AAA+ type, core         | 9   | 1.52 | 0.046569 | ABCB9, ABCB1A, ABCD1, ABCA8A, GM6524, ABCC4, ABCA2, BCS1L, ABCA3                                                                                                                                                                                                                                                                                                                                                                                                                                                                                                                                                                                                                                                                                                                                                                                                              | 513 | 138  | 17763 | 2.25819985 | 1 | 0.811923 | 52.503 |
| GOTERM_MF_FAT   | GO:0032555 ~purine ribonucleotide binding | 62  | 10.5 | 0.046574 | ACVRL1, INO80, ATP2B2, ACSS1, MAP3K4, DDX11, OASL1, GBP10, TARSL2, RTEL1, MATK, ATP8B4, NLRP6, NMNAT2, GBP6, MYLK3, OLA1, RND2, TYK2, PRKD2, PAPD4, ABCB1A, PDE5A, PKLR, ERN1, GM6524, BMP2K, MVK, MST1R, PRKD3, GBP2, GBP1, ABCD1, ABCA2, OAS2, ABCA3, TTBK2, RAC2, DCLK3, DCLK2, DHX58, CHD3, OBSCN, ABCB9, IRGM2, AK1, MET, ABCA8A, ACACA, BCS1L, NPR2, MMAB, ABCG8, ACSM1, ABCC4, GRK4, MYO19, JAK3, PIP4K2A                                                                                                                                                                                                                                                                                                                                                                                                                                                              | 367 | 1796 | 13288 | 1.24991049 | 1 | 0.701275 | 50.622 |

|                 |                                                                |    |      |          |                                                                                                                                                                                                                                                                                                                                                                                                                                                                                                                                                |     |      |       |            |        |          |        |
|-----------------|----------------------------------------------------------------|----|------|----------|------------------------------------------------------------------------------------------------------------------------------------------------------------------------------------------------------------------------------------------------------------------------------------------------------------------------------------------------------------------------------------------------------------------------------------------------------------------------------------------------------------------------------------------------|-----|------|-------|------------|--------|----------|--------|
| GOTERM_MF_FAT   | GO:0032553<br>~ribonucleotide binding                          | 62 | 10.5 | 0.046574 | ACVRL1, INO80, ATP2B2, ACSS1, MAP3K4, DDX11, OASL1, GBP10, TARSL2, RTEL1, MATK, ATP8B4, NLRP6, NMNAT2, GBP6, MYLK3, OLA1, RND2, TYK2, PRKD2, PAPD4, ABCB1A, PDE5A, PKLR, ERN1, GM6524, BMP2K, MVK, MST1R, PRKD3, GBP2, GBP1, ABCD1, ABCA2, OAS2, ABCA3, TTBK2, RAC2, DCLK3, DCLK2, DHX58, CHD3, OBSCN, ABCB9, IRGM2, AK1, MET, ABCA8A, ACACA, BCS1L, NPR2, MMAB, ABCG8, ACSM1, ABCC4, GRK4, MYO19, JAK3, PIP4K2A                                                                                                                               | 367 | 1796 | 13288 | 1.24991049 | 1      | 0.701275 | 50.622 |
| GOTERM_BP_FAT   | GO:0006732<br>~coenzyme metabolic process                      | 9  | 1.52 | 0.047636 | NMNAT2, ACSS1, GGT6, GGT7, ACNAT1, MTR, GSTT1, GSTT3, ACOT3                                                                                                                                                                                                                                                                                                                                                                                                                                                                                    | 381 | 143  | 13588 | 2.24459006 | 1      | 0.966238 | 56.357 |
| GOTERM_BP_FAT   | GO:0006790<br>~sulfur metabolic process                        | 7  | 1.18 | 0.04804  | GGT6, GGT7, MTR, SULF1, CYTL1, GSTT1, GSTT3                                                                                                                                                                                                                                                                                                                                                                                                                                                                                                    | 381 | 94   | 13588 | 2.65583291 | 1      | 0.962794 | 56.67  |
| SMART           | SM00252:SH2                                                    | 8  | 1.35 | 0.0492   | TYK2, DAPP1, SH2D5, JAK3, STAT1, BLNK, MATK, STAT2                                                                                                                                                                                                                                                                                                                                                                                                                                                                                             | 275 | 111  | 9131  | 2.39305487 | 0.9999 | 0.794194 | 46.525 |
| GOTERM_MF_FAT   | GO:0008270<br>~zinc ion binding                                | 71 | 12   | 0.049754 | PILRB2, ZC3HAV1, AGTPBP1, CAR5A, MMP28, GLI3, ZKSCAN4, GM14391, STAC2, SETMAR, ZFP831, ZFP354A, MICAL1, ZC3HAV1L, ZFP882, DDAH1, ZFP354B, CAR14, PRKD2, TRIM35, ZFP867, ZFP280D, PDE5A, PGCP, PRKD3, ZFP710, ZFP418, ZFP395, SORD, USP3, ZFP715, ZFP69, ZFP398, TRIM14, PML, ASAP1, ZFP456, DPF1, ZFP455, ZDHHC24, NR1D1, GMIP, TCEA3, ADH1, STAMBPL1, FASN, ADAMTS10, KDM3A, XAF1, SLC39A5, CAR1, DHX58, CAR3, FGD4, CHD3, SGIP1, AGBL3, ESRRB, PM20D1, 4931406C07RIK, TET1, FOXP2, ADAP2, ZFP182, MTR, ZFP7, MZF1, LIME1, ZFHX2, ARAP2, KLF1 | 367 | 2105 | 13288 | 1.22123658 | 1      | 0.710948 | 53.004 |
| GOTERM_CC_FAT   | GO:0009897<br>~external side of plasma membrane                | 11 | 1.85 | 0.050518 | RAET1D, COL23A1, CD8B1, GPR125, SELL, ICOS, GYPA, TNFRSF13C, TNFSF13, SCNN1A, FCGR1                                                                                                                                                                                                                                                                                                                                                                                                                                                            | 336 | 206  | 12504 | 1.9871706  | 1      | 0.640116 | 49.536 |
| PIR_SUPERFAMILY | PIRSFU00617<br>:tyrosine-protein kinase, HGF/MSP receptor type | 2  | 0.34 | 0.050959 | MET, MST1R                                                                                                                                                                                                                                                                                                                                                                                                                                                                                                                                     | 211 | 2    | 8136  | 38.5592417 | 1      | 0.948606 | 48.786 |

|                 |                                                                                 |    |      |          |                                                                                                                                                                                                                                                                                                                                                                                                                                                                                                            |     |      |       |            |   |          |        |
|-----------------|---------------------------------------------------------------------------------|----|------|----------|------------------------------------------------------------------------------------------------------------------------------------------------------------------------------------------------------------------------------------------------------------------------------------------------------------------------------------------------------------------------------------------------------------------------------------------------------------------------------------------------------------|-----|------|-------|------------|---|----------|--------|
| PIR_SUPERFAMILY | PIRSF000617<br>:TyrPK_HGFR                                                      | 2  | 0.34 | 0.050959 | MET, MST1R                                                                                                                                                                                                                                                                                                                                                                                                                                                                                                 | 211 | 2    | 8136  | 38.5592417 | 1 | 0.948606 | 48.786 |
| UP_SEQ_FEATURE  | domain:IRS-type PTB                                                             | 3  | 0.51 | 0.05198  | DOK3, DOK4, DOK7                                                                                                                                                                                                                                                                                                                                                                                                                                                                                           | 500 | 12   | 16021 | 8.0105     | 1 | 0.999993 | 58.981 |
| INTERPRO        | IPR002404:Insulin receptor substrate-1, PTB                                     | 3  | 0.51 | 0.052429 | DOK3, DOK4, DOK7                                                                                                                                                                                                                                                                                                                                                                                                                                                                                           | 513 | 13   | 17763 | 7.99055331 | 1 | 0.837496 | 56.862 |
| GOTERM_MF_FAT   | GO:0000166<br>~nucleotide binding                                               | 73 | 12.3 | 0.054313 | KIFC2, GNA14, XRCC3, ACVRL1, LDHD, INO80, ATP2B2, ACSS1, MAP3K4, DDX11, OASL1, GBP10, TARSL2, RTEL1, RDM1, ATP8B4, MATK, NLRP6, NMNAT2, GBP6, MYLK3, OLA1, TYK2, RND2, HAO1, PRKD2, ABCB1A, PAPD4, SQLE, PDE5A, PKLR, GM6524, ERN1, BMP2K, CPSF7, MVK, MST1R, PRKD3, GBP2, GBP1, ABCD1, ABCA2, OAS2, ABCA3, TTBK2, RAC2, DCLK3, DCLK2, DHX58, CHD3, OBSCN, CHDH, ABCB9, IRGM2, CSTF2, AK1, MET, ABCA8A, ACACA, TREX1, BCS1L, NPR2, MMAB, ABCG8, ACSM1, DHFR, AOX1, ABCC4, AOX3, GRK4, MYO19, JAK3, PIP4K2A | 367 | 2183 | 13288 | 1.21077287 | 1 | 0.729063 | 56.231 |
| SP_PIR_KEYWORDS | Lectin                                                                          | 10 | 1.69 | 0.054316 | GLG1, APCS, LGALS4, SELL, CD248, LGALS1, FREM1, CD209F, PKD1, SELPLG                                                                                                                                                                                                                                                                                                                                                                                                                                       | 518 | 167  | 17854 | 2.06390308 | 1 | 0.573554 | 53.426 |
| INTERPRO        | IPR002165:Plaxin                                                                | 4  | 0.67 | 0.054384 | SEMA5B, SEMA6A, MET, MST1R                                                                                                                                                                                                                                                                                                                                                                                                                                                                                 | 513 | 30   | 17763 | 4.61676413 | 1 | 0.837872 | 58.231 |
| GOTERM_BP_FAT   | GO:0042482<br>~positive regulation of odontogenesis                             | 2  | 0.34 | 0.055152 | CSF1, NGFR                                                                                                                                                                                                                                                                                                                                                                                                                                                                                                 | 381 | 2    | 13588 | 35.664042  | 1 | 0.974193 | 61.852 |
| GOTERM_BP_FAT   | GO:0042488<br>~positive regulation of odontogenesis of dentine-containing tooth | 2  | 0.34 | 0.055152 | CSF1, NGFR                                                                                                                                                                                                                                                                                                                                                                                                                                                                                                 | 381 | 2    | 13588 | 35.664042  | 1 | 0.974193 | 61.852 |
| UP_SEQ_FEATURE  | domain:Semaphorin                                                               | 4  | 0.67 | 0.05532  | SEMA5B, SEMA6A, MET, MST1R                                                                                                                                                                                                                                                                                                                                                                                                                                                                                 | 500 | 28   | 16021 | 4.57742857 | 1 | 0.999985 | 61.328 |
| UP_SEQ_FEATURE  | domain:ABC transporter 2                                                        | 4  | 0.67 | 0.05532  | ABCB1A, ABCA8A, ABCA2, ABCA3                                                                                                                                                                                                                                                                                                                                                                                                                                                                               | 500 | 28   | 16021 | 4.57742857 | 1 | 0.999985 | 61.328 |
| UP_SEQ_FEATURE  | domain:ABC transporter 1                                                        | 4  | 0.67 | 0.05532  | ABCB1A, ABCA8A, ABCA2, ABCA3                                                                                                                                                                                                                                                                                                                                                                                                                                                                               | 500 | 28   | 16021 | 4.57742857 | 1 | 0.999985 | 61.328 |
| SMART           | SM00382:AA1A                                                                    | 9  | 1.52 | 0.055708 | ABCB9, ABCB1A, ABCD1, ABCA8A, GM6524, ABCC4, ABCA2, BCS1L, ABCA3                                                                                                                                                                                                                                                                                                                                                                                                                                           | 275 | 138  | 9131  | 2.16545455 | 1 | 0.785503 | 50.893 |

|                 |                                                     |    |      |          |                                                                                                                                                                                         |     |     |       |            |        |          |        |
|-----------------|-----------------------------------------------------|----|------|----------|-----------------------------------------------------------------------------------------------------------------------------------------------------------------------------------------|-----|-----|-------|------------|--------|----------|--------|
| SMART           | SM00310:PTBI                                        | 3  | 0.51 | 0.056283 | DOK3, DOK4, DOK7                                                                                                                                                                        | 275 | 13  | 9131  | 7.66237762 | 1      | 0.743677 | 51.262 |
| INTERPRO        | IPR016244:Tyrosine-protein kinase, HGF/MSP receptor | 2  | 0.34 | 0.056819 | MET, MST1R                                                                                                                                                                              | 513 | 2   | 17763 | 34.625731  | 1      | 0.840802 | 59.878 |
| GOTERM_BP_FAT   | GO:0050853 ~B cell receptor signaling pathway       | 3  | 0.51 | 0.056869 | LAT2, BCAR1, NFAM1                                                                                                                                                                      | 381 | 14  | 13588 | 7.64229471 | 1      | 0.973859 | 63.013 |
| GOTERM_BP_FAT   | GO:0015893 ~drug transport                          | 3  | 0.51 | 0.056869 | ABP1, ABCB1A, ABCC4                                                                                                                                                                     | 381 | 14  | 13588 | 7.64229471 | 1      | 0.973859 | 63.013 |
| SP_PIR_KEYWORDS | leucine-rich repeat                                 | 14 | 2.36 | 0.057728 | FMOD, NLRP6, FLRT1, PODNL1, LRRN4, FBXL21, GPR125, LRTM1, LRRC19, IGFALS, TLR7, AMIGO3, LRG1, PKD1                                                                                      | 518 | 275 | 17854 | 1.75469287 | 1      | 0.580887 | 55.673 |
| SP_PIR_KEYWORDS | neurogenesis                                        | 9  | 1.52 | 0.058347 | NRP2, SEMA5B, SEMA6A, NRP1, 6530402F18RIK, PAX5, ATOH8, NGFR, DPF1                                                                                                                      | 518 | 144 | 17854 | 2.15419884 | 1      | 0.570041 | 56.07  |
| INTERPRO        | IPR000863:Sulfotransferase                          | 4  | 0.67 | 0.05897  | HS3ST6, SULT5A1, CHST3, 2810007J2ARIK                                                                                                                                                   | 513 | 31  | 17763 | 4.46783626 | 1      | 0.842084 | 61.283 |
| INTERPRO        | IPR001627:Semaphorin/C D100 antigen                 | 4  | 0.67 | 0.05897  | SEMA5B, SEMA6A, MET, MST1R                                                                                                                                                              | 513 | 31  | 17763 | 4.46783626 | 1      | 0.842084 | 61.283 |
| SP_PIR_KEYWORDS | peroxisome                                          | 7  | 1.18 | 0.060062 | HAO1, FAR2, ABCD1, ACNAT1, MVK, IDI1, ACOT3                                                                                                                                             | 518 | 96  | 17854 | 2.51323198 | 1      | 0.566647 | 57.152 |
| KEGG_PATHWAY    | mmu00900: Terpenoid backbone biosynthesis           | 3  | 0.51 | 0.060283 | FDPS, MVK, IDI1                                                                                                                                                                         | 167 | 14  | 5738  | 7.36270317 | 0.9997 | 0.601013 | 51.665 |
| GOTERM_CC_FAT   | GO:0005777 ~peroxisome                              | 7  | 1.18 | 0.060539 | HAO1, FAR2, ABCD1, ACNAT1, MVK, IDI1, ACOT3                                                                                                                                             | 336 | 104 | 12504 | 2.50480769 | 1      | 0.683068 | 56.128 |
| GOTERM_CC_FAT   | GO:0042579 ~microbody                               | 7  | 1.18 | 0.060539 | HAO1, FAR2, ABCD1, ACNAT1, MVK, IDI1, ACOT3                                                                                                                                             | 336 | 104 | 12504 | 2.50480769 | 1      | 0.683068 | 56.128 |
| UP_SEQ_FEATURE  | domain:PKD4                                         | 2  | 0.34 | 0.061325 | AU040320, PKD1                                                                                                                                                                          | 500 | 2   | 16021 | 32.042     | 1      | 0.999983 | 65.233 |
| UP_SEQ_FEATURE  | domain:PKD3                                         | 2  | 0.34 | 0.061325 | AU040320, PKD1                                                                                                                                                                          | 500 | 2   | 16021 | 32.042     | 1      | 0.999983 | 65.233 |
| GOTERM_BP_FAT   | GO:0042592 ~homeostatic process                     | 24 | 4.05 | 0.061639 | SLC12A7, SCD2, SLC9A6, LDLR, NDN, CSF1, MLXIPL, TNFRSF13C, ACACA, ABCA2, ILDR2, SLC9A3R1, GHRHR, BCL2L11, ABCG8, ATP2B2, GCKR, DNAJC16, PCSK9, RGN, SLC39A5, 2700094K13RIK, KLF1, RTE11 | 381 | 584 | 13588 | 1.46564556 | 1      | 0.978243 | 66.065 |

|                 |                                     |    |      |          |                                                                                                                                                                                                                                                                                                                                                                                                                                                                                                                                                                                                                |     |      |       |            |   |          |        |
|-----------------|-------------------------------------|----|------|----------|----------------------------------------------------------------------------------------------------------------------------------------------------------------------------------------------------------------------------------------------------------------------------------------------------------------------------------------------------------------------------------------------------------------------------------------------------------------------------------------------------------------------------------------------------------------------------------------------------------------|-----|------|-------|------------|---|----------|--------|
| UP_SEQ_FEATURE  | topological domain:Extracellular    | 81 | 13.7 | 0.061913 | NRP2, GYPC, SLC36A1, PILRB2, ACVRL1, NRP1, GABRB3, AU040320, GPR125, LDLR, CLDN4, AQP8, LRTM1, BTC, GYPA, LRRC19, TNFSF13, CD53, GABBR2, TLR7, GHRHR, ATP2B2, DNAJC16, FITM1, SLC2A2, S1PR5, SLC22A1, GPR97, PARM1, COL23A1, CAR14, CMKLR1, GOLT1B, TMIE, TMEM132A, NFAM1, TMEM132E, CD37, SSTR2, LAT2, AMIGO3, RELT, ABCB1A, NGFR, MST1R, GLG1, GPR183, AB124611, CD248, CSF1, GPR64, FPR1, BDKRB2, TPCN2, SEMA5B, PVRL4, ICOS, PVRL3, SHISA5, SUCNR1, SLC39A5, SELPLG, SCNN1A, PRAF2, CD8B1, MPZ, LRRN4, SELL, MET, TNFRSF13C, CD300E, NPR2, GPR77, FCGR1, ABCG8, SEMA6A, GGT6, GGT7, LTBR4R1, PLSCR2, LIME1 | 500 | 2174 | 16021 | 1.19383717 | 1 | 0.999953 | 65.595 |
| SP_PIR_KEYWORDS | transferase                         | 51 | 8.6  | 0.062274 | GPAT2, GSTM6, ZDHHC24, MAP3K4, HNMT, TTBK2, UGT1A5, TRDMT1, SETMAR, OASL1, DCLK3, FASN, DCLK2, LIPT1, MATK, OBSCN, NMNAT2, FKTN, MYLK3, AK1, MET, ACNAT1, FDPS, GSTT1, CHST3, GSTT3, MMAB, INMT, TYK2, AWAT2, PRKD2, GGT6, RPAP1, GGT7, PAPD4, MTR, PKLR, ERN1, BMP2K, 5033411D12RIK, GRK4, GAMT, MVK, 2810007J24RIK, MST1R, JAK3, PIP4K2A, PRKD3                                                                                                                                                                                                                                                              | 518 | 1385 | 17854 | 1.26918863 | 1 | 0.5665   | 58.511 |
| GOTERM_MF_FAT   | GO:0005529 ~sugar binding           | 10 | 1.69 | 0.063106 | GLG1, APCS, LGALS4, SELL, CD248, LGALS1, FREM1, CD209F, PKD1, SELPLG                                                                                                                                                                                                                                                                                                                                                                                                                                                                                                                                           | 367 | 181  | 13288 | 2.00039141 | 1 | 0.769583 | 61.882 |
| INTERPRO        | IPR000203:GPS                       | 4  | 0.67 | 0.063731 | GPR97, GPR125, GPR64, PKD1                                                                                                                                                                                                                                                                                                                                                                                                                                                                                                                                                                                     | 513 | 32   | 17763 | 4.32821637 | 1 | 0.855607 | 64.231 |
| GOTERM_MF_FAT   | GO:0032403 ~protein complex binding | 6  | 1.01 | 0.063789 | DOK3, DOK4, SLC2A2, DOK7, TREX1, FCGR1                                                                                                                                                                                                                                                                                                                                                                                                                                                                                                                                                                         | 367 | 78   | 13288 | 2.78516034 | 1 | 0.760998 | 62.291 |
| SP_PIR_KEYWORDS | lyase                               | 8  | 1.35 | 0.064324 | CAR14, FASN, NPL, NPR2, CAR5A, OGG1, CAR1, CAR3                                                                                                                                                                                                                                                                                                                                                                                                                                                                                                                                                                | 518 | 122  | 17854 | 2.26014305 | 1 | 0.565454 | 59.736 |
| SMART           | SM00630:Semama                      | 4  | 0.67 | 0.064802 | SEMA5B, SEMA6A, MET, MST1R                                                                                                                                                                                                                                                                                                                                                                                                                                                                                                                                                                                     | 275 | 31   | 9131  | 4.28434018 | 1 | 0.753278 | 56.448 |
| GOTERM_MF_FAT   | GO:0070330 ~aromatase activity      | 4  | 0.67 | 0.066182 | CYP2A22, CYP2C55, CYP2D11, CYP2A5                                                                                                                                                                                                                                                                                                                                                                                                                                                                                                                                                                              | 367 | 34   | 13288 | 4.259657   | 1 | 0.762022 | 63.692 |
| GOTERM_MF_FAT   | GO:0017124 ~SH3 domain binding      | 6  | 1.01 | 0.066639 | PLSCR2, BCAR1, DENND1A, MICAL1, SH3BP1, SHANK2                                                                                                                                                                                                                                                                                                                                                                                                                                                                                                                                                                 | 367 | 79   | 13288 | 2.74990515 | 1 | 0.752822 | 63.954 |

|                 |                                                                                 |    |      |          |                                                                                                                                                                                                                                                                                                                                                                                                                                                                                                                        |     |      |       |            |        |          |        |
|-----------------|---------------------------------------------------------------------------------|----|------|----------|------------------------------------------------------------------------------------------------------------------------------------------------------------------------------------------------------------------------------------------------------------------------------------------------------------------------------------------------------------------------------------------------------------------------------------------------------------------------------------------------------------------------|-----|------|-------|------------|--------|----------|--------|
| GOTERM_CC_FAT   | GO:0030424<br>~axon                                                             | 7  | 1.18 | 0.06758  | NRP2, PRPH, SEMA6A,<br>NRP1, GABRB3, ANK3,<br>GM6524                                                                                                                                                                                                                                                                                                                                                                                                                                                                   | 336 | 107  | 12504 | 2.43457944 | 1      | 0.700913 | 60.273 |
| KEGG_PATHWAY    | mmu04520:<br>Adherens<br>junction                                               | 6  | 1.01 | 0.068194 | PVRL4, RAC2, PVRL3, MET,<br>ACTN1, LEF1                                                                                                                                                                                                                                                                                                                                                                                                                                                                                | 167 | 76   | 5738  | 2.71257485 | 0.9999 | 0.609131 | 56.214 |
| SP_PIR_KEYWORDS | cell<br>membrane                                                                | 61 | 10.3 | 0.068929 | GYPC, SLC36A1, GPR125,<br>CLDN4, GABRB3, BTC,<br>TNFSF13, GABBR2, FAM57A,<br>GHRHR, ATP2B2, RAET1D,<br>S1PR5, VNN1, SLC22A1,<br>GPR97, PARM1, COL23A1,<br>CMKLR1, NFAM1, RFTN2,<br>TMEM67, SSTR2, LAT2,<br>DOK3, RELT, ABCB1A,<br>6530402F18RIK, DOK7,<br>GBP2, GBP1, GLG1, GPR183,<br>BBS7, CSF1, GPR64, FPR1,<br>BDKRB2, PVRL4, PDE6C,<br>FOLR2, PVRL3, SUCNR1,<br>SLC39A5, SELPLG, SCNN1A,<br>BLNK, CNNM4, DLGAP3,<br>ABCA8A, CD300E,<br>DENND1A, GPR77, FCGR1,<br>SHANK2, LIN7A, ADAP2,<br>LTB4R1, LIME1, PLEKHA2, | 518 | 1713 | 17854 | 1.22737774 | 1      | 0.578709 | 62.364 |
| SMART           | SM00303:GP<br>S                                                                 | 4  | 0.67 | 0.069982 | GPR97, GPR125, GPR64,<br>PKD1                                                                                                                                                                                                                                                                                                                                                                                                                                                                                          | 275 | 32   | 9131  | 4.15045455 | 1      | 0.744356 | 59.349 |
| SP_PIR_KEYWORDS | microsome                                                                       | 7  | 1.18 | 0.070316 | CYP2A22, CYP2C55, SQLE,<br>CYP2D11, UGT1A5, CYP2A5,<br>CYP4F14                                                                                                                                                                                                                                                                                                                                                                                                                                                         | 518 | 100  | 17854 | 2.4127027  | 1      | 0.573889 | 63.124 |
| GOTERM_CC_FAT   | GO:0005929<br>~cilium                                                           | 8  | 1.35 | 0.070894 | ATP2B2, NPHP4, SRPX,<br>BBS7, PKD1, CYS1, GLI3,<br>TTLL11                                                                                                                                                                                                                                                                                                                                                                                                                                                              | 336 | 135  | 12504 | 2.20529101 | 1      | 0.696938 | 62.096 |
| UP_SEQ_FEATURE  | nucleotide<br>phosphate-<br>binding<br>region:ATP 1                             | 4  | 0.67 | 0.070953 | ABCB1A, ABCA8A, ABCA2,<br>ABCA3                                                                                                                                                                                                                                                                                                                                                                                                                                                                                        | 500 | 31   | 16021 | 4.13445161 | 1      | 0.999971 | 70.731 |
| UP_SEQ_FEATURE  | nucleotide<br>phosphate-<br>binding<br>region:ATP 2                             | 4  | 0.67 | 0.070953 | ABCB1A, ABCA8A, ABCA2,<br>ABCA3                                                                                                                                                                                                                                                                                                                                                                                                                                                                                        | 500 | 31   | 16021 | 4.13445161 | 1      | 0.999971 | 70.731 |
| UP_SEQ_FEATURE  | domain:GPS                                                                      | 4  | 0.67 | 0.070953 | GPR97, GPR125, GPR64,<br>PKD1                                                                                                                                                                                                                                                                                                                                                                                                                                                                                          | 500 | 31   | 16021 | 4.13445161 | 1      | 0.999971 | 70.731 |
| INTERPRO        | IPR013320:C<br>oncanavalin<br>A-like<br>lectin/glucan<br>ase,<br>subgroup       | 6  | 1.01 | 0.071321 | LAMA4, APCS, LGALS4,<br>LGALS1, COL20A1, THBS3                                                                                                                                                                                                                                                                                                                                                                                                                                                                         | 513 | 77   | 17763 | 2.69810891 | 1      | 0.878332 | 68.499 |
| GOTERM_BP_FAT   | GO:0046068<br>~cGMP<br>metabolic<br>process                                     | 3  | 0.51 | 0.072317 | ATP2B2, PDE5A, NPR2                                                                                                                                                                                                                                                                                                                                                                                                                                                                                                    | 381 | 16   | 13588 | 6.68700787 | 1      | 0.987358 | 72.061 |
| PIR_SUPERFAMILY | PIRSF800007<br>:secretin<br>receptor-like<br>G protein-<br>coupled<br>receptors | 4  | 0.67 | 0.073944 | GPR97, GPR125, GPR64,<br>GHRHR                                                                                                                                                                                                                                                                                                                                                                                                                                                                                         | 211 | 38   | 8136  | 4.05886755 | 1      | 0.969428 | 62.574 |



|                 |                                                    |    |      |          |                                                                                                                                                                                                                                           |     |     |       |            |   |          |        |
|-----------------|----------------------------------------------------|----|------|----------|-------------------------------------------------------------------------------------------------------------------------------------------------------------------------------------------------------------------------------------------|-----|-----|-------|------------|---|----------|--------|
| SP_PIR_KEYWORD  | sh3 domain                                         | 11 | 1.85 | 0.074203 | OBSCN, STAC2, BCAR1, ABI3, SPNA1, ASAP1, PPP1R13B, MPP7, SHANK2, 1700029G01RIK, MATK                                                                                                                                                      | 518 | 204 | 17854 | 1.85852449 | 1 | 0.582291 | 65.178 |
| PIR_SUPERFAMILY | PIRSF000636:TyrPK Jak                              | 2  | 0.34 | 0.075461 | TYK2, JAK3                                                                                                                                                                                                                                | 211 | 3   | 8136  | 25.7061611 | 1 | 0.948615 | 63.351 |
| PIR_SUPERFAMILY | PIRSF005680:interferon-induced 56K protein         | 2  | 0.34 | 0.075461 | IFIT2, IFIT1                                                                                                                                                                                                                              | 211 | 3   | 8136  | 25.7061611 | 1 | 0.948615 | 63.351 |
| PIR_SUPERFAMILY | PIRSF036899:alpha(1)-acid glycoprotein             | 2  | 0.34 | 0.075461 | ORM1, ORM2                                                                                                                                                                                                                                | 211 | 3   | 8136  | 25.7061611 | 1 | 0.948615 | 63.351 |
| PIR_SUPERFAMILY | PIRSF000344:acyl-CoA desaturase                    | 2  | 0.34 | 0.075461 | SCD1, SCD2                                                                                                                                                                                                                                | 211 | 3   | 8136  | 25.7061611 | 1 | 0.948615 | 63.351 |
| PIR_SUPERFAMILY | PIRSF036899:AGP                                    | 2  | 0.34 | 0.075461 | ORM1, ORM2                                                                                                                                                                                                                                | 211 | 3   | 8136  | 25.7061611 | 1 | 0.948615 | 63.351 |
| PIR_SUPERFAMILY | PIRSF036960:Neuropilin                             | 2  | 0.34 | 0.075461 | NRP2, NRP1                                                                                                                                                                                                                                | 211 | 3   | 8136  | 25.7061611 | 1 | 0.948615 | 63.351 |
| PIR_SUPERFAMILY | PIRSF000636:tyrosine-protein kinase, Jak/Tyk2 type | 2  | 0.34 | 0.075461 | TYK2, JAK3                                                                                                                                                                                                                                | 211 | 3   | 8136  | 25.7061611 | 1 | 0.948615 | 63.351 |
| UP_SEQ_FEATURE  | domain:PH 2                                        | 4  | 0.67 | 0.076559 | ADAP2, ARAP2, PLEKHA2, FGD4                                                                                                                                                                                                               | 500 | 32  | 16021 | 4.00525    | 1 | 0.999968 | 73.544 |
| INTERPRO        | IPR006209:EGF                                      | 8  | 1.35 | 0.077194 | PLAT, LDLR, LTBP3, SELL, CD248, 6530402F18RIK, BTC, PROZ                                                                                                                                                                                  | 513 | 128 | 17763 | 2.16410819 | 1 | 0.891148 | 71.47  |
| UP_SEQ_FEATURE  | domain:Protein kinase 2                            | 3  | 0.51 | 0.077813 | TYK2, OBSCN, JAK3                                                                                                                                                                                                                         | 500 | 15  | 16021 | 6.4084     | 1 | 0.99994  | 74.137 |
| UP_SEQ_FEATURE  | domain:Protein kinase 1                            | 3  | 0.51 | 0.077813 | TYK2, OBSCN, JAK3                                                                                                                                                                                                                         | 500 | 15  | 16021 | 6.4084     | 1 | 0.99994  | 74.137 |
| GOTERM_BP_FAT   | GO:0007242 ~intracellular signaling cascade        | 34 | 5.73 | 0.079519 | PML, FGF13, GHRHR, PLEKHG2, PLCB4, STAC2, RAC2, GMIP, DCLK2, PKD1, SPRED3, FGD4, NFATC1, OBSCN, GPR155, MET, NPR2, HGF, NFAM1, SLC9A3R1, E130306D19RIK, RCAN2, RND2, TYK2, PRKD2, LAT2, SSTR2, DOK3, ADAP2, DOK4, RGS9, JAK3, ASB4, PRKD3 | 381 | 915 | 13588 | 1.32522123 | 1 | 0.990663 | 75.526 |
| GOTERM_MF_FAT   | GO:0004031 ~aldehyde oxidase activity              | 2  | 0.34 | 0.080382 | AOX1, AOX3                                                                                                                                                                                                                                | 367 | 3   | 13288 | 24.1380563 | 1 | 0.806697 | 71.057 |

|                |                                                                                                           |   |      |          |                             |     |    |       |            |   |          |        |
|----------------|-----------------------------------------------------------------------------------------------------------|---|------|----------|-----------------------------|-----|----|-------|------------|---|----------|--------|
| GOTERM_MF_FAT  | GO:0016623<br>~oxidoreductase activity, acting on the aldehyde or oxo group of donors, oxygen as acceptor | 2 | 0.34 | 0.080382 | AOX1, AOX3                  | 367 | 3  | 13288 | 24.1380563 | 1 | 0.806697 | 71.057 |
| GOTERM_BP_FAT  | GO:0010166<br>~wax metabolic process                                                                      | 2 | 0.34 | 0.081579 | AWAT2, FAR2                 | 381 | 3  | 13588 | 23.776028  | 1 | 0.990483 | 76.44  |
| GOTERM_BP_FAT  | GO:0051450<br>~myoblast proliferation                                                                     | 2 | 0.34 | 0.081579 | MET, HGF                    | 381 | 3  | 13588 | 23.776028  | 1 | 0.990483 | 76.44  |
| GOTERM_BP_FAT  | GO:0048012<br>~hepatocyte growth factor receptor signaling pathway                                        | 2 | 0.34 | 0.081579 | MET, HGF                    | 381 | 3  | 13588 | 23.776028  | 1 | 0.990483 | 76.44  |
| GOTERM_BP_FAT  | GO:0010025<br>~wax biosynthetic process                                                                   | 2 | 0.34 | 0.081579 | AWAT2, FAR2                 | 381 | 3  | 13588 | 23.776028  | 1 | 0.990483 | 76.44  |
| UP_SEQ_FEATURE | domain:PH 1                                                                                               | 4 | 0.67 | 0.082353 | ADAP2, ARAP2, PLEKHA2, FGD4 | 500 | 33 | 16021 | 3.88387879 | 1 | 0.999931 | 76.182 |
| INTERPRO       | IPR001500:A<br>Ipha-1-acid glycoprotein                                                                   | 2 | 0.34 | 0.084008 | ORM1, ORM2                  | 513 | 3  | 17763 | 23.0838207 | 1 | 0.904738 | 74.587 |
| INTERPRO       | IPR016251:T<br>tyrosine-protein kinase, Jak/Tyk2                                                          | 2 | 0.34 | 0.084008 | TYK2, JAK3                  | 513 | 3  | 17763 | 23.0838207 | 1 | 0.904738 | 74.587 |
| INTERPRO       | IPR006554:H<br>elicase-like, DEXD box c2 type                                                             | 2 | 0.34 | 0.084008 | DDX11, RTEL1                | 513 | 3  | 17763 | 23.0838207 | 1 | 0.904738 | 74.587 |
| INTERPRO       | IPR014648:N<br>europilin                                                                                  | 2 | 0.34 | 0.084008 | NRP2, NRP1                  | 513 | 3  | 17763 | 23.0838207 | 1 | 0.904738 | 74.587 |

|                 |                                                |    |      |          |                                                                                                                                                                                                                                                                                                                                                                                                                              |     |      |       |            |   |          |        |
|-----------------|------------------------------------------------|----|------|----------|------------------------------------------------------------------------------------------------------------------------------------------------------------------------------------------------------------------------------------------------------------------------------------------------------------------------------------------------------------------------------------------------------------------------------|-----|------|-------|------------|---|----------|--------|
| GOTERM_BP_FAT   | GO:0006350<br>~transcription                   | 60 | 10.1 | 0.084013 | ZKSCAN4, GM14391, HOMEZ, ZFP354A, SPIB, ATOH8, ZFP882, ZFP354B, POU2AF1, BARHL1, RBL1, MLXIPL, SCAI, LEF1, HDAC11, TLE2, ZFP867, ZFP280D, ERN1, CAND2, CDCA7L, CUX1, TRAPPC2, ZFP710, ZFP418, ZFP715, NDN, ZFP69, ZFP398, PML, ZFP456, DPF1, ZFP455, TSC22D1, TRP53BP1, TCEA3, NR1D1, POU2F1, KDM3A, PER3, NFATC1, SREBF1, ESRRB, STAT1, FOXP2, STAT2, FOXF1A, RPAP1, SAP130, HNRNPUL1, ZFP182, DBP, ZFP7, MZF1, LIME1, KLF1 | 381 | 1772 | 13588 | 1.20758607 | 1 | 0.990521 | 77.478 |
| INTERPRO        | IPR001565:Synaptotagmin                        | 3  | 0.51 | 0.084816 | SYT3, DOC2G, SYT7                                                                                                                                                                                                                                                                                                                                                                                                            | 513 | 17   | 17763 | 6.11042312 | 1 | 0.900432 | 74.935 |
| GOTERM_MF_FAT   | GO:0019904<br>~protein domain specific binding | 10 | 1.69 | 0.084834 | ATP2B2, LAT2, PLSCR2, BCAR1, DENND1A, MICAL1, SH3BP1, SHANK2, KLF1, SCNN1A                                                                                                                                                                                                                                                                                                                                                   | 367 | 192  | 13288 | 1.88578565 | 1 | 0.814435 | 73.063 |
| GOTERM_MF_FAT   | GO:0005096<br>~GTPase activator activity       | 10 | 1.69 | 0.084834 | ARHGAP30, SGSM1, ADAP2, CHML, GMIP, TBC1D4, ASAP1, RGS9, SH3BP1, ARAP2                                                                                                                                                                                                                                                                                                                                                       | 367 | 192  | 13288 | 1.88578565 | 1 | 0.814435 | 73.063 |
| PIR_SUPERFAMILY | PIRSF000503<br>:glutathione transferase        | 3  | 0.51 | 0.085077 | GSTT1, GSTT3, GSTM6                                                                                                                                                                                                                                                                                                                                                                                                          | 211 | 19   | 8136  | 6.08830132 | 1 | 0.944056 | 67.939 |
| GOTERM_MF_FAT   | GO:0031406<br>~carboxylic acid binding         | 6  | 1.01 | 0.085193 | FOLR2, FASN, ACACA, BC046331, FABP1, LEPREL1                                                                                                                                                                                                                                                                                                                                                                                 | 367 | 85   | 13288 | 2.5557942  | 1 | 0.806124 | 73.219 |
| SP_PIR_KEYWORDS | multifunctional enzyme                         | 5  | 0.84 | 0.08695  | HSD3B2, FASN, ACACA, ERN1, OGG1                                                                                                                                                                                                                                                                                                                                                                                              | 518 | 58   | 17854 | 2.97130875 | 1 | 0.631297 | 71.195 |
| UP_SEQ_FEATURE  | domain:ABC transporter                         | 3  | 0.51 | 0.087153 | ABCG8, ABCB9, ABCD1                                                                                                                                                                                                                                                                                                                                                                                                          | 500 | 16   | 16021 | 6.007875   | 1 | 0.999924 | 78.179 |
| SMART           | SM00488:DEXDc2                                 | 2  | 0.34 | 0.087358 | DDX11, RTE11                                                                                                                                                                                                                                                                                                                                                                                                                 | 275 | 3    | 9131  | 22.1357576 | 1 | 0.790348 | 67.83  |

|                 |                                                 |    |      |          |                                                                                                                                                                                                                                                                                                                                                                                                                                                                                                                                                                                                                                                                                                                                |     |      |       |            |   |          |        |
|-----------------|-------------------------------------------------|----|------|----------|--------------------------------------------------------------------------------------------------------------------------------------------------------------------------------------------------------------------------------------------------------------------------------------------------------------------------------------------------------------------------------------------------------------------------------------------------------------------------------------------------------------------------------------------------------------------------------------------------------------------------------------------------------------------------------------------------------------------------------|-----|------|-------|------------|---|----------|--------|
| SP_PIR_KEYWORDS | signal                                          | 99 | 16.7 | 0.087533 | <p> LRTM1, BTC, BPHL, TLR7, GHRHR, OLFML3, SBSN, VNN1, TMIE, TMEM132A, TMEM132E, RELT, 6530402F18RIK, PGCP, MST1R, GLG1, AB124611, LEAP2, PVRL4, SEMA5B, FOLR2, ICOS, PVRL3, OLFM1, FN1, PLAT, ABCB9, CD8B1, EFEMP2, MET, CD300E, HGF, FCGR1, LCN2, SEMA6A, LAMA4, FREM1, CHRDR, NRP2, ARSB, PILRB2, PODNL1, ACVRL1, NRP1, LDLR, LRRRC19, GABBR2, MMP28, 2010001M09RIK, RAET1D, DNAJC16, SRPX, SERPINA7, PROZ, GPR97, PARM1, APCS, CAR14, PRG4, IGFALS, NFAM1, AMIGO3, CTSO, ERN1, NGFR, LEPREL1, FMOD, CD248, CSF1, GPR64, CXCL9, LRG1, UGT1A5, COL27A1, SHISA5, PKD1, PCSK9, ADAMTS10, SLC39A5, LECT2, SELPLG, THBS3, MPZ, LRRN4, SELL, RNASE4, PM20D1, NPR2, 4930572J05RIK, WNT2B, ABP1, ORM1, GLA, SULF1, ORM2, GFRA2 </p> | 518 | 2970 | 17854 | 1.14890605 | 1 | 0.622553 | 71.446 |
| UP_SEQ_FEATURE  | metal ion-binding site:Iron (heme axial ligand) | 7  | 1.18 | 0.088697 | CYP2A22, CYP2C55, CYP2D11, CYP2A5, CYP4F14, CYB5B, CYB5D1                                                                                                                                                                                                                                                                                                                                                                                                                                                                                                                                                                                                                                                                      | 500 | 99   | 16021 | 2.26559596 | 1 | 0.999883 | 78.787 |
| GOTERM_BP_FAT   | GO:0006518 ~peptide metabolic process           | 4  | 0.67 | 0.089301 | GGT6, GGT7, GSTT1, GSTT3                                                                                                                                                                                                                                                                                                                                                                                                                                                                                                                                                                                                                                                                                                       | 381 | 38   | 13588 | 3.75410968 | 1 | 0.991966 | 79.588 |
| UP_SEQ_FEATURE  | binding site:Substrate                          | 14 | 2.36 | 0.09003  | HAO1, ARSB, NMNAT2, DHFR, HNMT, AKR1C6, RNASE4, PKLR, GAMT, GALE, IDI1, AKR1D1, LIPT1, DDAH1                                                                                                                                                                                                                                                                                                                                                                                                                                                                                                                                                                                                                                   | 500 | 275  | 16021 | 1.63122909 | 1 | 0.999826 | 79.299 |
| UP_SEQ_FEATURE  | domain:PKD1                                     | 2  | 0.34 | 0.090565 | AU040320, PKD1                                                                                                                                                                                                                                                                                                                                                                                                                                                                                                                                                                                                                                                                                                                 | 500 | 3    | 16021 | 21.3613333 | 1 | 0.999733 | 79.501 |
| UP_SEQ_FEATURE  | repeat:1; approximate                           | 2  | 0.34 | 0.090565 | CSTF2, PRG4                                                                                                                                                                                                                                                                                                                                                                                                                                                                                                                                                                                                                                                                                                                    | 500 | 3    | 16021 | 21.3613333 | 1 | 0.999733 | 79.501 |
| UP_SEQ_FEATURE  | repeat:12; approximate                          | 2  | 0.34 | 0.090565 | CSTF2, PRG4                                                                                                                                                                                                                                                                                                                                                                                                                                                                                                                                                                                                                                                                                                                    | 500 | 3    | 16021 | 21.3613333 | 1 | 0.999733 | 79.501 |
| UP_SEQ_FEATURE  | domain:PKD2                                     | 2  | 0.34 | 0.090565 | AU040320, PKD1                                                                                                                                                                                                                                                                                                                                                                                                                                                                                                                                                                                                                                                                                                                 | 500 | 3    | 16021 | 21.3613333 | 1 | 0.999733 | 79.501 |
| KEGG_PATHWAY    | mmu00590: Arachidonic acid metabolism           | 6  | 1.01 | 0.091578 | CYP2C55, GGT6, GGT7, CYP2C44, CYP4F14, CYP2B13                                                                                                                                                                                                                                                                                                                                                                                                                                                                                                                                                                                                                                                                                 | 167 | 83   | 5738  | 2.48380348 | 1 | 0.686919 | 67.472 |
| INTERPRO        | IPR013149:A lcohol dehydrogenase, zinc-binding  | 3  | 0.51 | 0.093659 | SORD, ADH1, FASN                                                                                                                                                                                                                                                                                                                                                                                                                                                                                                                                                                                                                                                                                                               | 513 | 18   | 17763 | 5.77095517 | 1 | 0.916968 | 78.46  |

|                 |                                                 |    |      |          |                                                                                                                                                                                                                                                                                                                                                                                                                                                   |     |      |       |            |   |          |        |
|-----------------|-------------------------------------------------|----|------|----------|---------------------------------------------------------------------------------------------------------------------------------------------------------------------------------------------------------------------------------------------------------------------------------------------------------------------------------------------------------------------------------------------------------------------------------------------------|-----|------|-------|------------|---|----------|--------|
| GOTERM_BP_FAT   | GO:0000902<br>~cell morphogenesis               | 14 | 2.36 | 0.094261 | NRP1, NDN, ESRRB, LEF1, HGF, GLI3, NUMBL, SEMA6A, ATP2B2, FOXF1A, ANK3, 6530402F18RIK, NGFR, NFATC1                                                                                                                                                                                                                                                                                                                                               | 381 | 309  | 13588 | 1.61584656 | 1 | 0.993015 | 81.396 |
| SP_PIR_KEYWORDS | FAD                                             | 7  | 1.18 | 0.096834 | CHDH, SQLE, PYROXD1, MAOA, LDHD, AOX1, MICAL1                                                                                                                                                                                                                                                                                                                                                                                                     | 518 | 109  | 17854 | 2.21348872 | 1 | 0.650565 | 75.181 |
| GOTERM_MF_FAT   | GO:0003677<br>~DNA binding                      | 59 | 9.95 | 0.097013 | POU6F1, XRCC4, XRCC3, ELF3, PAX5, INO80, GLI3, ZKSCAN4, DDX11, HOMEZ, ZFP354A, SPIB, ATOH8, ZFP354B, RTEL1, RDM1, POU2AF1, SP100, BARHL1, MLXIPL, NUSAP1, LEF1, ZFP280D, CUX1, ZFP710, ZFP395, NDN, A730008H23RIK, PML, TSC22D1, MEIS3, TRP53BP1, TCEA3, NR1D1, HJURP, TRDMT1, POU2F1, ETV5, DHX58, NFATC1, ZBP1, SGIP1, CHD3, SREBF1, PDS5B, ESRRB, TREX1, STAT1, TET1, FOXP2, STAT2, FOXF1A, RPAP1, ZFP182, DBP, MZF1, LIME1, ZFHX2, OGG1, KLF1 | 367 | 1781 | 13288 | 1.19944862 | 1 | 0.838758 | 77.907 |
| KEGG_PATHWAY    | mmu04810: Regulation of actin cytoskeleton      | 11 | 1.85 | 0.09711  | RAC2, MYLK3, BCAR1, CYFIP2, ACTN1, MYLPP, FGF13, BDKRB2, PIP4K2A, FGF1, FN1                                                                                                                                                                                                                                                                                                                                                                       | 167 | 217  | 5738  | 1.74171473 | 1 | 0.677683 | 69.714 |
| GOTERM_BP_FAT   | GO:0051336<br>~regulation of hydrolase activity | 10 | 1.69 | 0.099539 | SGSM1, ADAP2, CHML, PML, ERN1, RGN, TBC1D4, ASAP1, INTS1, ARAP2                                                                                                                                                                                                                                                                                                                                                                                   | 381 | 196  | 13588 | 1.81959398 | 1 | 0.993994 | 83.155 |

Supplementary Table 3.

© 2000-2015 QIAGEN. All rights reserved.

| Ingenuity Canonical Pathways                                 | -log(p-value) | Ratio    | Overlap | Molecules                                                                                                    |
|--------------------------------------------------------------|---------------|----------|---------|--------------------------------------------------------------------------------------------------------------|
| Superpathway of Cholesterol Biosynthesis                     | 4.28E00       | 2.14E-01 | 6/28    | FDPS,SQLE,NSDHL,IDI1,MVK,LSS                                                                                 |
| LXR/RXR Activation                                           | 2.5E00        | 7.44E-02 | 9/121   | ABCG8,SCD,MLXIPL,LDLR,SREBF1,ITIH4,NGFR,FASN,ACACA                                                           |
| LPS/IL-1 Mediated Inhibition of RXR Function                 | 2.49E00       | 5.94E-02 | 13/219  | ABCG8,ABCB1,SLC10A1,ABCB9,Cyp2a12/Cyp2a22,SREBF1,NGFR,CHST3,FABP1,CYP2A6 (includes others),HS3ST6,ABCC4,MAOA |
| Cholesterol Biosynthesis I                                   | 2.45E00       | 2.31E-01 | 3/13    | SQLE,NSDHL,LSS                                                                                               |
| Cholesterol Biosynthesis II (via 24,25-dihydrocholesterol)   | 2.45E00       | 2.31E-01 | 3/13    | SQLE,NSDHL,LSS                                                                                               |
| Cholesterol Biosynthesis III (via Desmosterol)               | 2.45E00       | 2.31E-01 | 3/13    | SQLE,NSDHL,LSS                                                                                               |
| IL-15 Production                                             | 2.39E00       | 1.48E-01 | 4/27    | TYK2,MST1R,STAT1,JAK3                                                                                        |
| Nicotine Degradation II                                      | 2.34E00       | 9.52E-02 | 6/63    | CYP2C18,CYP2A6 (includes others),AOX1,UGT1A4,INMT,Aox3                                                       |
| Trans, trans-farnesyl Diphosphate Biosynthesis               | 2.24E00       | 4E-01    | 2/5     | FDPS,IDI1                                                                                                    |
| Superpathway of Geranylgeranyldiphosphate Biosynthesis       | 2.1E00        | 1.76E-01 | 3/17    | FDPS,IDI1,MVK                                                                                                |
| Hepatic Fibrosis / Hepatic Stellate Cell Activation          | 1.98E00       | 5.56E-02 | 11/198  | MET,FN1,CSF1,COL23A1,TNFSF13,NGFR,HGF,COL20A1,STAT1,COL27A1,FGF1                                             |
| Nicotine Degradation III                                     | 1.98E00       | 9.26E-02 | 5/54    | CYP2C18,CYP2A6 (includes others),AOX1,UGT1A4,Aox3                                                            |
| Maturity Onset Diabetes of Young (MODY2)                     | 1.79E00       | 1.36E-01 | 3/22    | PKLR,SLC2A2,FABP1                                                                                            |
| TR/RXR Activation                                            | 1.73E00       | 7.06E-02 | 6/85    | LDLR,SREBF1,FASN,ACACA,RCAN2,THRSP                                                                           |
| Actin Cytoskeleton Signaling                                 | 1.71E00       | 5.07E-02 | 11/217  | RAC2,FN1,CYFIP2,MYLPP,MYLK3,PIP4K2A,BCAR1,ACTN1,FGF13,FGF1,MATK                                              |
| Role of JAK1, JAK2 and TYK2 in Interferon Signaling          | 1.69E00       | 1.25E-01 | 3/24    | TYK2,STAT2,STAT1                                                                                             |
| Activation of IRF by Cytosolic Pattern Recognition Receptors | 1.68E00       | 7.81E-02 | 5/64    | DHX58,ZBP1,STAT2,STAT1,IFIT2                                                                                 |
| Sorbitol Degradation I                                       | 1.61E00       | 1E00     | 1/1     | SORD                                                                                                         |
| Lipoate Salvage and Modification                             | 1.61E00       | 1E00     | 1/1     | LIPT1                                                                                                        |
| Methylglyoxal Degradation VI                                 | 1.61E00       | 1E00     | 1/1     | LDHD                                                                                                         |
| Lanosterol Biosynthesis                                      | 1.61E00       | 1E00     |         | LSS                                                                                                          |
| UDP-N-acetyl-D-galactosamine Biosynthesis                    | 1.61E00       | 1E00     |         | GALE                                                                                                         |
| FXR/RXR Activation                                           | 1.42E00       | 5.51E-02 |         | ABCG8,MLXIPL,SLC10A1,PKLR,SREBF1,ITIH4,FASN                                                                  |
| Primary Immunodeficiency Signaling                           | 1.41E00       | 7.69E-02 |         | BLNK,ICOS,JAK3,TNFRSF13C                                                                                     |
| Oleate Biosynthesis II (Animals)                             | 1.4E00        | 1.54E-01 |         | SCD,Scd2                                                                                                     |
| Mevalonate Pathway I                                         | 1.4E00        | 1.54E-01 |         | IDI1,MVK                                                                                                     |
| Bile Acid Biosynthesis, Neutral Pathway                      | 1.4E00        | 1.54E-01 |         | AKR1D1,AKR1C4                                                                                                |
| Semaphorin Signaling in Neurons                              | 1.38E00       | 7.55E-02 |         | RND2,MET,DPYSL4,NRP1                                                                                         |
| Role of BRCA1 in DNA Damage Response                         | 1.36E00       | 6.41E-02 |         | POU2F1,DPF1,FANCG,STAT1,RBL1                                                                                 |
| Epoxysqualene Biosynthesis                                   | 1.31E00       | 5E-01    |         | SQLE                                                                                                         |
| Lipoate Biosynthesis and Incorporation                       | 1.31E00       | 5E-01    |         | LIPT1                                                                                                        |
| Choline Degradation I                                        | 1.31E00       | 5E-01    |         | CHDH                                                                                                         |
| Palmitate Biosynthesis I (Animals)                           | 1.31E00       | 5E-01    |         | FASN                                                                                                         |
| Fatty Acid Biosynthesis Initiation II                        | 1.31E00       | 5E-01    |         | FASN                                                                                                         |
| Glycine Degradation (Creatine Biosynthesis)                  | 1.31E00       | 5E-01    |         | GAMT                                                                                                         |
| Oncostatin M Signaling                                       | 1.29E00       | 8.82E-02 |         | TYK2,STAT1,JAK3                                                                                              |
| Interferon Signaling                                         | 1.29E00       | 8.82E-02 |         | TYK2,STAT2,STAT1                                                                                             |
| Androgen Biosynthesis                                        | 1.29E00       | 1.33E-01 |         | HSD3B1,AKR1C4                                                                                                |
| Leukotriene Biosynthesis                                     | 1.29E00       | 1.33E-01 |         | GGT6,GGT7                                                                                                    |
| γ-glutamyl Cycle                                             | 1.29E00       | 1.33E-01 |         | GGT6,GGT7                                                                                                    |
| IL-17A Signaling in Fibroblasts                              | 1.26E00       | 8.57E-02 |         | NFKBID,TRAF3IP2,LCN2                                                                                         |
| tRNA Splicing                                                | 1.26E00       | 8.57E-02 |         | PDE6C,TDP2,PDE5A                                                                                             |
| Triacylglycerol Biosynthesis                                 | 1.26E00       | 8.57E-02 |         | PPAPDC1B,GPAT2,ELOVL6                                                                                        |
| Stearate Biosynthesis I (Animals)                            | 1.26E00       | 8.57E-02 |         | FASN,ACOT1,ELOVL6                                                                                            |
| phagosome formation                                          | 1.24E00       | 5.41E-02 |         | RND2,PLCB4,FN1,TLR7,PRKD3,FCGR1A                                                                             |
| Estrogen Biosynthesis                                        | 1.2E00        | 8.11E-02 |         | CYP2C18,CYP2A6 (includes others),AKR1C4                                                                      |
| Superpathway of Melatonin Degradation                        | 1.17E00       | 6.45E-02 |         | CYP2C18,CYP2A6 (includes others),UGT1A4,MAOA                                                                 |
| Methionine Salvage II (Mammalian)                            | 1.14E00       | 3.33E-01 |         | MTR                                                                                                          |
| Axonal Guidance Signaling                                    | 1.14E00       | 3.7E-02  |         | RAC2,NRP2,MYLPP,WNT2B,SEMA6A,GNA14,BCAR1,NFATC1,MET,MICAL1,PLCB4,GLI3,NGFR,SHANK2,PRKD3,NRP1                 |
| Granulocyte Adhesion and Diapedesis                          | 1.14E00       | 4.52E-02 |         | SELL,MMP28,CLDN4,NGFR,Cxcl9,GLG1,SELPLG,FPF1                                                                 |
| PXR/RXR Activation                                           | 1.08E00       | 5.97E-02 |         | ABCB1,SCD,CYP2A6 (includes others),ABCB9                                                                     |
| DNA Methylation and Transcriptional Regulation               | 1.06E00       | 1E-01    |         | CHD3,SAP130                                                                                                  |
| Regulation of the Epithelial-Mesenchymal Transition          | 1.06E00       | 4.35E-02 |         | MET,HGF,WNT2B,TYK2,LEF1,JAK3,FGF13,FGF1                                                                      |
| GDNF Family Ligand-Receptor Interactions                     | 1.06E00       | 5.88E-02 |         | DOK4,DOK7,GFRA2,DOK3                                                                                         |
| Macropinocytosis Signaling                                   | 1.06E00       | 5.88E-02 |         | MET,CSF1,HGF,PRKD3                                                                                           |
| iNOS Signaling                                               | 1.02E00       | 6.82E-02 |         | TYK2,STAT1,JAK3                                                                                              |
| α-tocopherol Degradation                                     | 1.02E00       | 2.5E-01  |         | CYP4F12                                                                                                      |

|                                                                                 |          |          |  |                                                                                  |
|---------------------------------------------------------------------------------|----------|----------|--|----------------------------------------------------------------------------------|
| Geranylgeranyldiphosphate Biosynthesis                                          | 1.02E00  | 2.5E-01  |  | FDPS                                                                             |
| Biotin-carboxyl Carrier Protein Assembly                                        | 1.02E00  | 2.5E-01  |  | ACACA                                                                            |
| Melatonin Degradation II                                                        | 1.02E00  | 2.5E-01  |  | MAOA                                                                             |
| Tec Kinase Signaling                                                            | 1.01E00  | 4.43E-02 |  | RND2, TYK2, STAT2, GNA14, STAT1, JAK3, PRKD3                                     |
| JAK/Stat Signaling                                                              | 9.89E-01 | 5.56E-02 |  | TYK2, STAT2, STAT1, JAK3                                                         |
| Hepatic Cholestasis                                                             | 9.69E-01 | 4.32E-02 |  | ABCG8, ABCB1, SLC10A1, SREBF1, NGFR, MAP3K4, PRKD3                               |
| TREM1 Signaling                                                                 | 9.41E-01 | 5.33E-02 |  | NLRC5, NLRP6, TLR7, LAT2                                                         |
| Galactose Degradation I (Leloir Pathway)                                        | 9.3E-01  | 2E-01    |  | GALE                                                                             |
| dTMP De Novo Biosynthesis                                                       | 9.3E-01  | 2E-01    |  | DHFR                                                                             |
| Acetate Conversion to Acetyl-CoA                                                | 9.3E-01  | 2E-01    |  | ACSS1                                                                            |
| IL-22 Signaling                                                                 | 9.29E-01 | 8.33E-02 |  | TYK2, STAT1                                                                      |
| Leukocyte Extravasation Signaling                                               | 9.26E-01 | 4.04E-02 |  | RAC2, MMP28, CLDN4, MAP3K4, PRKD3, BCAR1, ACTN1, SELPLG                          |
| HGF Signaling                                                                   | 9.26E-01 | 4.76E-02 |  | MET, ELF3, HGF, MAP3K4, PRKD3                                                    |
| Role of Macrophages, Fibroblasts and Endothelial Cells in IL-6-type 1 Signaling | 9.14E-01 | 3.69E-02 |  | PLCB4, FN1, TRAF3IP2, CSF1, NGFR, WNT2B, TLR7, LEF1, PRKD3, FCGR1A, NFATC1       |
| Role of JAK family kinases in IL-6-type 1 Signaling                             | 9E-01    | 8E-02    |  | TYK2, STAT1                                                                      |
| Bupropion Degradation                                                           | 9E-01    | 8E-02    |  | CYP2C18, CYP2A6 (includes others)                                                |
| Acetone Degradation I (to Methylglyoxal)                                        | 8.72E-01 | 7.69E-02 |  | CYP2C18, CYP2A6 (includes others)                                                |
| Zymosterol Biosynthesis                                                         | 8.56E-01 | 1.67E-01 |  | NSDHL                                                                            |
| NAD Biosynthesis III                                                            | 8.56E-01 | 1.67E-01 |  | NMNAT2                                                                           |
| D-myo-inositol (1,4,5)-Trisphosphate Binding Protein Signaling                  | 8.45E-01 | 7.41E-02 |  | PLCB4, PIP4K2A                                                                   |
| Epithelial Adherens Junction Signaling                                          | 8.13E-01 | 4.11E-02 |  | MET, HGF, PVRL3, LEF1, ACTN1, FGF1                                               |
| FGF Signaling                                                                   | 7.99E-01 | 4.71E-02 |  | MET, HGF, FGF13, FGF1                                                            |
| Production of Nitric Oxide and Reactive Oxygen Species                          | 7.99E-01 | 3.89E-02 |  | RND2, NGFR, TYK2, MAP3K4, STAT1, JAK3, PRKD3                                     |
| Wnt/Ca+ pathway                                                                 | 7.95E-01 | 5.36E-02 |  | PLCB4, PDE6C, NFATC1                                                             |
| NAD Biosynthesis from 2-amino-3-carboxy-5-methylimidazo[4,5-f]sulfonamide       | 7.94E-01 | 1.43E-01 |  | NMNAT2                                                                           |
| NAD Salvage Pathway III                                                         | 7.94E-01 | 1.43E-01 |  | NMNAT2                                                                           |
| Pregnenolone Biosynthesis                                                       | 7.94E-01 | 1.43E-01 |  | MICAL1                                                                           |
| Melatonin Degradation I                                                         | 7.79E-01 | 5.26E-02 |  | CYP2C18, CYP2A6 (includes others), UGT1A4                                        |
| Glutathione-mediated Detoxification                                             | 7.72E-01 | 6.67E-02 |  | Gstt3, Gstt1                                                                     |
| Altered T Cell and B Cell Signaling in Rheumatoid Arthritis                     | 7.62E-01 | 4.55E-02 |  | CSF1, TNFSF13, TLR7, TNFRSF13C                                                   |
| CXCR4 Signaling                                                                 | 7.57E-01 | 3.95E-02 |  | RND2, PLCB4, MYLPP, GNA14, PRKD3, BCAR1                                          |
| Aldosterone Signaling in Epithelial Cells                                       | 7.57E-01 | 3.95E-02 |  | SCNN1A, PLCB4, DNAJC9, PIP4K2A, PRKD3, DNAJC16                                   |
| Glucose and Glucose-1-phosphate Degradation                                     | 7.41E-01 | 1.25E-01 |  | RGN                                                                              |
| G-Protein Coupled Receptor Signaling                                            | 7.34E-01 | 3.52E-02 |  | GABBR2, GRK4, PLCB4, LTB4R, PDE6C, TDP2, PDE5A, GNA14, FPR1                      |
| Regulation of Actin-based Motility by Rho GTPases                               | 7.26E-01 | 4.4E-02  |  | RND2, RAC2, MYLPP, PIP4K2A                                                       |
| Communication between Innate and Adaptive Immune Cells                          | 7.26E-01 | 4.4E-02  |  | TNFSF13, TLR7, TNFRSF13C, CD8B                                                   |
| Agranulocyte Adhesion and Diapedesis                                            | 7.26E-01 | 3.7E-02  |  | SELL, FN1, MMP28, CLDN4, Cxcl9, GLG1, SELPLG                                     |
| Circadian Rhythm Signaling                                                      | 7.08E-01 | 6.06E-02 |  | PER3, NR1D1                                                                      |
| Retinoate Biosynthesis I                                                        | 7.08E-01 | 6.06E-02 |  | ADH1C, AKR1C4                                                                    |
| Ethanol Degradation II                                                          | 7.08E-01 | 6.06E-02 |  | ADH1C, ACSS1                                                                     |
| Calcium Transport I                                                             | 6.95E-01 | 1.11E-01 |  | ATP2B2                                                                           |
| UDP-N-acetyl-D-galactosamine Biosynthesis                                       | 6.95E-01 | 1.11E-01 |  | GALE                                                                             |
| Folate Transformations I                                                        | 6.95E-01 | 1.11E-01 |  | MTR                                                                              |
| Role of JAK1 and JAK3 in $\gamma$ c Cytokine Signaling                          | 6.91E-01 | 4.76E-02 |  | BLNK, STAT1, JAK3                                                                |
| IL-9 Signaling                                                                  | 6.89E-01 | 5.88E-02 |  | STAT1, JAK3                                                                      |
| Germ Cell-Sertoli Cell Junction Signaling                                       | 6.89E-01 | 3.75E-02 |  | RND2, RAC2, PVRL3, MAP3K4, BCAR1, ACTN1                                          |
| IL-17A Signaling in Airway Cells                                                | 6.77E-01 | 4.69E-02 |  | TRAF3IP2, TYK2, JAK3                                                             |
| Serotonin Degradation                                                           | 6.77E-01 | 4.69E-02 |  | ADH1C, UGT1A4, MAOA                                                              |
| PI3K Signaling in B Lymphocytes                                                 | 6.77E-01 | 3.91E-02 |  | BLNK, PLCB4, DAPP1, PLEKHA2, NFATC1                                              |
| Coagulation System                                                              | 6.7E-01  | 5.71E-02 |  | BDKRB2, PLAT                                                                     |
| Role of JAK2 in Hormone-like Cytokine Signaling                                 | 6.7E-01  | 5.71E-02 |  | TYK2, STAT1                                                                      |
| Noradrenaline and Adrenaline Degradation                                        | 6.7E-01  | 5.71E-02 |  | ADH1C, MAOA                                                                      |
| Histidine Degradation VI                                                        | 6.55E-01 | 1E-01    |  | MICAL1                                                                           |
| Colorectal Cancer Metastasis Signaling                                          | 6.38E-01 | 3.39E-02 |  | RND2, MMP28, WNT2B, TYK2, TLR7, LEF1, STAT1, JAK3                                |
| Remodeling of Epithelial Adherens Junctions                                     | 6.27E-01 | 4.41E-02 |  | MET, HGF, ACTN1                                                                  |
| Cholecystokinin/Gastrin-mediated Signaling                                      | 6.2E-01  | 3.96E-02 |  | RND2, PLCB4, PRKD3, BCAR1                                                        |
| April Mediated Signaling                                                        | 6.17E-01 | 5.26E-02 |  | TNFSF13, NFATC1                                                                  |
| Relaxin Signaling                                                               | 6.16E-01 | 3.7E-02  |  | PDE6C, TDP2, PDE5A, GNA14, NPR2                                                  |
| Growth Hormone Signaling                                                        | 6.15E-01 | 4.35E-02 |  | IGFALS, STAT1, PRKD3                                                             |
| Protein Kinase A Signaling                                                      | 6.1E-01  | 3.12E-02 |  | PLCB4, GLI3, MYLPP, NGFR, CDC14B, PDE6C, MYLK3, TDP2, PDE5A, LEF1, PRKD3, NFATC1 |
| Role of NFAT in Regulation of the Immune System                                 | 6.04E-01 | 3.51E-02 |  | BLNK, PLCB4, GNA14, FCGR1A, RCAN2, NFATC1                                        |
| Netrin Signaling                                                                | 6.01E-01 | 5.13E-02 |  | RAC2, NFATC1                                                                     |
| T Helper Cell Differentiation                                                   | 5.92E-01 | 4.23E-02 |  | NGFR, ICOS, STAT1                                                                |
| Cleavage and Polyadenylation of Pre-mRNA                                        | 5.86E-01 | 8.33E-02 |  | CSTF2                                                                            |

|                                          |          |          |                                                               |
|------------------------------------------|----------|----------|---------------------------------------------------------------|
| Hematopoiesis from Multipotent Stem C    | 5.86E-01 | 8.33E-02 | CSF1                                                          |
| Acyl-CoA Hydrolysis                      | 5.86E-01 | 8.33E-02 | ACOT1                                                         |
| Mineralocorticoid Biosynthesis           | 5.86E-01 | 8.33E-02 | HSD3B1                                                        |
| BER pathway                              | 5.86E-01 | 8.33E-02 | OGG1                                                          |
| Role of PKR in Interferon Induction and  | 5.85E-01 | 5E-02    | STAT1,FCGR1A                                                  |
| B Cell Activating Factor Signaling       | 5.85E-01 | 5E-02    | TNFRSF13C,NFATC1                                              |
| Basal Cell Carcinoma Signaling           | 5.8E-01  | 4.17E-02 | GLI3,WNT2B,LEF1                                               |
| B Cell Receptor Signaling                | 5.69E-01 | 3.41E-02 | BLNK,PAX5,RAC2,DAPP1,MAP3K4,NFATC1                            |
| Ubiquinol-10 Biosynthesis (Eukaryotic)   | 5.56E-01 | 7.69E-02 | MICAL1                                                        |
| Histamine Degradation                    | 5.56E-01 | 7.69E-02 | HNMT                                                          |
| Guanosine Nucleotides Degradation III    | 5.56E-01 | 7.69E-02 | AOX1                                                          |
| Glucocorticoid Biosynthesis              | 5.56E-01 | 7.69E-02 | HSD3B1                                                        |
| fMLP Signaling in Neutrophils            | 5.56E-01 | 3.7E-02  | PLCB4,PRKD3,NFATC1,FPR1                                       |
| Calcium Signaling                        | 5.56E-01 | 3.37E-02 | TNNT1,HDAC11,RCAN2,Tpm2,NFATC1,ATP2B2                         |
| VEGF Family Ligand-Receptor Interactio   | 5.38E-01 | 3.95E-02 | NRP2,PRKD3,NRP1                                               |
| IL-4 Signaling                           | 5.38E-01 | 3.95E-02 | TYK2,JAK3,NFATC1                                              |
| Molecular Mechanisms of Cancer           | 5.32E-01 | 3.01E-02 | RND2,RAC2,PLCB4,WNT2B,TYK2,LEF1,GNA14,RBL1,JAK3,PRKD3,BCL2L11 |
| DNA Double-Strand Break Repair by No     | 5.29E-01 | 7.14E-02 | XRCC4                                                         |
| Urate Biosynthesis/Inosine 5'-phosphate  | 5.29E-01 | 7.14E-02 | AOX1                                                          |
| Phenylalanine Degradation IV (Mammal     | 5.29E-01 | 7.14E-02 | MAOA                                                          |
| Colanic Acid Building Blocks Biosynthes  | 5.29E-01 | 7.14E-02 | GALE                                                          |
| PDGF Signaling                           | 5.28E-01 | 3.9E-02  | TYK2,STAT1,JAK3                                               |
| Dermatan Sulfate Biosynthesis (Late Sta  | 5.28E-01 | 4.55E-02 | CHST3,HS3ST6                                                  |
| cAMP-mediated signaling                  | 5.25E-01 | 3.2E-02  | GABBR2,GRK4,LTB4R,PDE6C,TDP2,PDE5A,FPR1                       |
| Goq Signaling                            | 5.25E-01 | 3.4E-02  | RND2,PLCB4,GNA14,PRKD3,NFATC1                                 |
| NAD biosynthesis II (from tryptophan)    | 5.05E-01 | 6.67E-02 | NMNAT2                                                        |
| Chondroitin Sulfate Degradation (Metaz   | 5.05E-01 | 6.67E-02 | ARSB                                                          |
| MSP-RON Signaling Pathway                | 5.02E-01 | 4.35E-02 | CSF1,MST1R                                                    |
| Chondroitin Sulfate Biosynthesis (Late S | 5.02E-01 | 4.35E-02 | CHST3,HS3ST6                                                  |
| Type II Diabetes Mellitus Signaling      | 4.84E-01 | 3.42E-02 | PKLR,NGFR,SLC2A2,PRKD3                                        |
| CDP-diacylglycerol Biosynthesis I        | 4.82E-01 | 6.25E-02 | GPAT2                                                         |
| Oxidative Ethanol Degradation III        | 4.82E-01 | 6.25E-02 | ACSS1                                                         |
| Ephrin A Signaling                       | 4.77E-01 | 4.17E-02 | NGFR,BCAR1                                                    |
| PKCθ Signaling in T Lymphocytes          | 4.77E-01 | 3.39E-02 | RAC2,POU2F1,MAP3K4,NFATC1                                     |
| PTEN Signaling                           | 4.77E-01 | 3.39E-02 | RAC2,NGFR,BCAR1,BCL2L11                                       |
| GPCR-Mediated Nutrient Sensing in Ent    | 4.64E-01 | 3.57E-02 | PLCB4,GNA14,PRKD3                                             |
| Adenosine Nucleotides Degradation II     | 4.6E-01  | 5.88E-02 | AOX1                                                          |
| Putrescine Degradation III               | 4.6E-01  | 5.88E-02 | MAOA                                                          |
| Gustation Pathway                        | 4.56E-01 | 3.31E-02 | SCNN1A,PDE6C,TDP2,PDE5A                                       |
| Heparan Sulfate Biosynthesis (Late Sta   | 4.54E-01 | 4E-02    | CHST3,HS3ST6                                                  |
| Xenobiotic Metabolism Signaling          | 4.5E-01  | 2.95E-02 | ABCB1,ANKRA2,CHST3,HS3ST6,MAP3K4,UGT1A4,PRKD3,MAOA            |
| RhoA Signaling                           | 4.49E-01 | 3.28E-02 | NRP2,MYLPF,MYLK3,PIP4K2A                                      |
| Hematopoiesis from Pluripotent Stem C    | 4.43E-01 | 3.92E-02 | CSF1,CD8B                                                     |
| Tryptophan Degradation X (Mammalian,     | 4.4E-01  | 5.56E-02 | MAOA                                                          |
| Phosphatidylglycerol Biosynthesis II (N  | 4.4E-01  | 5.56E-02 | GPAT2                                                         |
| Bladder Cancer Signaling                 | 4.39E-01 | 3.45E-02 | MMP28,FGF13,FGF1                                              |
| CNTF Signaling                           | 4.33E-01 | 3.85E-02 | TYK2,STAT1                                                    |
| Neuregulin Signaling                     | 4.31E-01 | 3.41E-02 | BTC,PRKD3,MATK                                                |
| UVA-Induced MAPK Signaling               | 4.31E-01 | 3.41E-02 | PLCB4,ZC3HAV1,STAT1                                           |
| Integrin Signaling                       | 4.23E-01 | 2.99E-02 | RND2,RAC2,ASAP1,MYLK3,BCAR1,ACTN1                             |
| Phototransduction Pathway                | 4.23E-01 | 3.77E-02 | RGS9,PDE6C                                                    |
| Phospholipase C Signaling                | 4.22E-01 | 2.93E-02 | RND2,BLNK,PLCB4,HDAC11,MYLPF,PRKD3,NFATC1                     |
| GADD45 Signaling                         | 4.22E-01 | 5.26E-02 | MAP3K4                                                        |
| Glutathione Redox Reactions I            | 4.22E-01 | 5.26E-02 | Gstt1                                                         |
| Ethanol Degradation IV                   | 4.22E-01 | 5.26E-02 | ACSS1                                                         |
| Adipogenesis pathway                     | 4.16E-01 | 3.15E-02 | SREBF1,HDAC11,SAP130,FGF1                                     |
| Chondroitin Sulfate Biosynthesis         | 4.13E-01 | 3.7E-02  | CHST3,HS3ST6                                                  |
| Unfolded protein response                | 4.13E-01 | 3.7E-02  | SREBF1,ERN1                                                   |
| Purine Nucleotides Degradation II (Aero  | 4.05E-01 | 5E-02    | AOX1                                                          |
| GNRH Signaling                           | 4.03E-01 | 3.1E-02  | PLCB4,GNA14,MAP3K4,PRKD3                                      |
| Thrombopoietin Signaling                 | 4.03E-01 | 3.64E-02 | STAT1,PRKD3                                                   |
| Fcy Receptor-mediated Phagocytosis in    | 3.93E-01 | 3.23E-02 | RAC2,PRKD3,FCGR1A                                             |
| Endoplasmic Reticulum Stress Pathway     | 3.89E-01 | 4.76E-02 | ERN1                                                          |
| SAPK/JNK Signaling                       | 3.86E-01 | 3.19E-02 | RAC2,MAP3K4,NFATC1                                            |
| ErbB2-ErbB3 Signaling                    | 3.84E-01 | 3.51E-02 | TYK2,JAK3                                                     |
| Heparan Sulfate Biosynthesis             | 3.84E-01 | 3.51E-02 | CHST3,HS3ST6                                                  |



|                                             |          |          |                                  |
|---------------------------------------------|----------|----------|----------------------------------|
| Dermatan Sulfate Biosynthesis               | 3.84E-01 | 3.51E-02 | CHST3,HS3ST6                     |
| Mouse Embryonic Stem Cell Pluripotenc       | 3.79E-01 | 3.16E-02 | TYK2,LEF1,JAK3                   |
| Pyrimidine Deoxyribonucleotides De No       | 3.73E-01 | 4.55E-02 | AK1                              |
| Differential Regulation of Cytokine Prod    | 3.59E-01 | 4.35E-02 | LCN2                             |
| Sertoli Cell-Sertoli Cell Junction Signalin | 3.47E-01 | 2.81E-02 | CLDN4,PVRL3,MAP3K4,BCAR1,ACTN1   |
| Nitric Oxide Signaling in the Cardiovasc    | 3.46E-01 | 3E-02    | BDKRB2,PDE5A,PRKD3               |
| Estrogen-mediated S-phase Entry             | 3.45E-01 | 4.17E-02 | RBL1                             |
| Dopamine Degradation                        | 3.45E-01 | 4.17E-02 | MAOA                             |
| PPARα/RXRα Activation                       | 3.43E-01 | 2.79E-02 | PLCB4,FASN,CYP2C18,Cyp2c44,GNA14 |
| Dendritic Cell Maturation                   | 3.43E-01 | 2.79E-02 | PLCB4,NGFR,STAT2,STAT1,FCGR1A    |
| NRF2-mediated Oxidative Stress Respo        | 3.38E-01 | 2.78E-02 | DNAJC9,AOX1,PRKD3,DNAJC16,ABCC4  |
| Antiproliferative Role of Somatostatin R    | 3.34E-01 | 3.17E-02 | SSTR2,NPR2                       |
| Role of Lipids/Lipid Rafts in the Pathoge   | 3.32E-01 | 4E-02    | FDPS                             |
| Glycolysis I                                | 3.32E-01 | 4E-02    | PKLR                             |
| Synaptic Long Term Depression               | 3.31E-01 | 2.82E-02 | PLCB4,GNA14,PRKD3,NPR2           |
| Cell Cycle: G1/S Checkpoint Regulation      | 3.26E-01 | 3.12E-02 | HDAC11,RBL1                      |
| NAD Salvage Pathway II                      | 3.2E-01  | 3.85E-02 | NMNAT2                           |
| IL-15 Signaling                             | 3.12E-01 | 3.03E-02 | TYK2,JAK3                        |
| Glioblastoma Multiforme Signaling           | 3.11E-01 | 2.74E-02 | RND2,PLCB4,WNT2B,LEF1            |
| Pancreatic Adenocarcinoma Signaling         | 3.11E-01 | 2.83E-02 | TYK2,STAT1,JAK3                  |
| ERK/MAPK Signaling                          | 3.08E-01 | 2.67E-02 | RAC2,ELF3,STAT1,BCAR1,NFATC1     |
| GABA Receptor Signaling                     | 3.05E-01 | 2.99E-02 | GABBR2,GABRB3                    |
| AMPK Signaling                              | 3.02E-01 | 2.7E-02  | AK1,DPF1,FASN,ACACA              |
| iCOS-iCOSL Signaling in T Helper Cells      | 3E-01    | 2.78E-02 | ICOS,PLEKHA2,NFATC1              |
| Sphingosine-1-phosphate Signaling           | 2.95E-01 | 2.75E-02 | RND2,PLCB4,S1PR5                 |
| Thrombin Signaling                          | 2.91E-01 | 2.62E-02 | RND2,PLCB4,MYLPPF,GNA14,PRKD3    |
| Agtrin Interactions at Neuromuscular Jur    | 2.91E-01 | 2.9E-02  | RAC2,PKLR                        |
| Pyrimidine Ribonucleotides Interconvers     | 2.87E-01 | 3.45E-02 | AK1                              |
| Melatonin Signaling                         | 2.85E-01 | 2.86E-02 | PLCB4,PRKD3                      |
| Corticotropin Releasing Hormone Signa       | 2.85E-01 | 2.7E-02  | GLI3,PRKD3,NPR2                  |
| Role of NANOG in Mammalian Embryon          | 2.85E-01 | 2.7E-02  | WNT2B,TYK2,JAK3                  |
| IL-3 Signaling                              | 2.79E-01 | 2.82E-02 | STAT1,PRKD3                      |
| Renal Cell Carcinoma Signaling              | 2.79E-01 | 2.82E-02 | MET,HGF                          |
| GPCR-Mediated Integration of Enteroen       | 2.79E-01 | 2.82E-02 | PLCB4,GNA14                      |
| Sonic Hedgehog Signaling                    | 2.77E-01 | 3.33E-02 | GLI3                             |
| Pyrimidine Ribonucleotides De Novo Bid      | 2.68E-01 | 3.23E-02 | AK1                              |
| Prolactin Signaling                         | 2.66E-01 | 2.74E-02 | STAT1,PRKD3                      |
| Ephrin B Signaling                          | 2.66E-01 | 2.74E-02 | RAC2,GNA14                       |
| STAT3 Pathway                               | 2.66E-01 | 2.74E-02 | NGFR,TYK2                        |
| FLT3 Signaling in Hematopoietic Proger      | 2.6E-01  | 2.7E-02  | STAT2,STAT1                      |
| Superpathway of Methionine Degradatio       | 2.59E-01 | 3.12E-02 | MTR                              |
| G Protein Signaling Mediated by Tubby       | 2.5E-01  | 3.03E-02 | PLCB4                            |
| Synaptic Long Term Potentiation             | 2.47E-01 | 2.52E-02 | PLCB4,GNA14,PRKD3                |
| Acute Myeloid Leukemia Signaling            | 2.44E-01 | 2.6E-02  | LEF1,PML                         |
| HMGB1 Signaling                             | 2.42E-01 | 2.5E-02  | RND2,NGFR,PLAT                   |
| Gai Signaling                               | 2.42E-01 | 2.5E-02  | GABBR2,LTB4R,FPR1                |
| VDR/RXR Activation                          | 2.38E-01 | 2.56E-02 | SERPINB1,PRKD3                   |
| Sperm Motility                              | 2.38E-01 | 2.48E-02 | PLCB4,MST1R,PRKD3                |
| Thyroid Hormone Metabolism II (via Cor      | 2.34E-01 | 2.86E-02 | UGT1A4                           |
| Role of Wnt/GSK-3β Signaling in the Pa      | 2.33E-01 | 2.53E-02 | WNT2B,LEF1                       |
| Ceramide Signaling                          | 2.28E-01 | 2.5E-02  | S1PR5,NGFR                       |
| Antigen Presentation Pathway                | 2.19E-01 | 2.7E-02  | NLRC5                            |
| Notch Signaling                             | 2.12E-01 | 2.63E-02 | NUMBL                            |
| tRNA Charging                               | 2.05E-01 | 2.56E-02 | TARSL2                           |
| Inhibition of Matrix Metalloproteases       | 2.05E-01 | 2.56E-02 | MMP28                            |
| Thyroid Cancer Signaling                    | 1.99E-01 | 2.5E-02  | LEF1                             |

Supplementary Table 4.

| Category         | Term                                                   | Count | %     | PValue   | Genes                                                                                                                                                                                                                                                                                              | List Total | Pop Hits | Pop Total | Fold Enrichment | Bonferroni | Benjamini | FDR      |
|------------------|--------------------------------------------------------|-------|-------|----------|----------------------------------------------------------------------------------------------------------------------------------------------------------------------------------------------------------------------------------------------------------------------------------------------------|------------|----------|-----------|-----------------|------------|-----------|----------|
| SP_PIR_KEY WORDS | extracellular matrix                                   | 15    | 5.682 | 7.50E-07 | COL4A2, PXDN, FBN1, ELN, COL3A1, ADAMTS15, NID1, SPARC, MMP2, COL5A1, SMOC2, LEPRE1, COL1A2, COL6A1,                                                                                                                                                                                               | 232        | 213      | 17854     | 5.419           | 2.08E-04   | 2.08E-04  | 9.90E-04 |
| GOTERM_MF_FAT    | GO:0005201~extracellular matrix structural constituent | 7     | 2.652 | 2.05E-06 | COL4A2, FBN1, ELN, COL3A1, COL1A2, COL1A1, COL5A1, PXDN, MMP2, MMP1, ELN,                                                                                                                                                                                                                          | 174        | 30       | 13288     | 17.82           | 7.12E-04   | 7.12E-04  | 0.0028   |
| SP_PIR_KEY WORDS | Secreted                                               | 41    | 15.53 | 2.31E-06 | HSD17B13, ADAMTS15, COL3A1, FST, ELN, PF4, FSTL1, CX3CL1, MMP2, MFRP, AHSG, SMOC2, C1QTNF6, C1QTNF4, COL6A1, DEFB1, MUP11, COL4A2, SVEP1, NTF3, GZMA, FBN1, IL1RN, NID1, SERPINA1E, FGF21, SPARC, COL5A1, CHRDL2, LEPRE1, COL1A2, HBEGF, EGFL8, COL1A1, GDF15, IGFBP2, TREM2                       | 232        | 1420     | 17854     | 2.222           | 6.39E-04   | 3.19E-04  | 0.00304  |
| SP_PIR_KEY WORDS | triple helix                                           | 5     | 1.894 | 3.27E-06 | COL4A2, COL3A1, COL1A2, COL6A1, COL1A1                                                                                                                                                                                                                                                             | 232        | 9        | 17854     | 42.75           | 9.05E-04   | 3.02E-04  | 0.00432  |
| GOTERM_MF_FAT    | GO:0048407~platelet-derived growth factor binding      | 5     | 1.894 | 3.32E-06 | COL3A1, COL1A2, COL6A1, COL1A1, COL5A1, PXDN, MMP2, MMP1, ELN,                                                                                                                                                                                                                                     | 174        | 9        | 13288     | 42.43           | 0.001156   | 5.78E-04  | 0.00454  |
| GOTERM_CC_FAT    | GO:0005576~extracellular region                        | 45    | 17.05 | 3.50E-06 | HSD17B13, ADAMTS15, COL3A1, FST, ELN, PF4, FSTL1, CX3CL1, MMP2, MFRP, AHSG, SMOC2, C1QTNF6, C1QTNF4, GLIPR1, COL6A1, CASP1, DEFB1, MUP11, COL4A2, SVEP1, NGP, NTF3, GZMA, FBN1, IL1RN, NID1, SERPINA1E, FGF21, SPARC, COL5A1, CHRDL2, LEPRE1, COL1A2, HBEGF, EGFL8, COL1A1, GDF15, ADAM12, IGFBP2, | 165        | 1680     | 12504     | 2.03            | 6.83E-04   | 6.83E-04  | 0.00437  |
| GOTERM_CC_FAT    | GO:0031012~extracellular matrix                        | 16    | 6.061 | 1.34E-05 | COL4A2, FBN1, ELN, ADAMTS15, COL3A1, NID1, SPARC, MMP2, COL5A1, AHSG, SMOC2, LEPRE1, COL1A2, COL6A1, COL1A1, ADAM12                                                                                                                                                                                | 165        | 309      | 12504     | 3.924           | 0.002601   | 0.001301  | 0.01667  |
| GOTERM_CC_FAT    | GO:0044420~extracellular matrix part                   | 9     | 3.409 | 2.70E-05 | SMOC2, COL4A2, FBN1, COL3A1, COL1A2, NID1, SPARC, COL1A1, COL5A1                                                                                                                                                                                                                                   | 165        | 92       | 12504     | 7.413           | 0.005248   | 0.001752  | 0.03368  |
| GOTERM_CC_FAT    | GO:0005578~proteinaceous extracellular matrix          | 15    | 5.682 | 3.62E-05 | COL4A2, FBN1, ELN, COL3A1, ADAMTS15, NID1, SPARC, MMP2, COL5A1, SMOC2, LEPRE1, COL1A2, COL6A1,                                                                                                                                                                                                     | 165        | 297      | 12504     | 3.827           | 0.007036   | 0.001764  | 0.04519  |
| GOTERM_MF_FAT    | GO:0070330~aromatase activity                          | 6     | 2.273 | 7.23E-05 | CYP2D9, CYP4A12A, CYP1A1, CYP3A11, CYP2C67, CYP2C40, CYP2B10                                                                                                                                                                                                                                       | 174        | 34       | 13288     | 13.48           | 0.024862   | 0.008357  | 0.09881  |
| INTERPRO         | IPR008160:Collagen triple helix repeat                 | 8     | 3.03  | 7.48E-05 | COL4A2, C1QTNF6, COL3A1, COL1A2, COL6A1, COL1A1, COL5A1, MFRP                                                                                                                                                                                                                                      | 226        | 81       | 17763     | 7.763           | 0.035928   | 0.035928  | 0.10736  |
| UP_SEQ_FEATURE   | domain:VWFC                                            | 5     | 1.894 | 8.50E-05 | PXDN, COL3A1, FSTL1, COL1A1, AMN                                                                                                                                                                                                                                                                   | 231        | 17       | 16021     | 20.4            | 0.06314    | 0.06314   | 0.12972  |
| GOTERM_CC_FAT    | GO:0005581~collagen                                    | 5     | 1.894 | 9.48E-05 | COL4A2, COL3A1, COL1A2, COL1A1, COL5A1                                                                                                                                                                                                                                                             | 165        | 19       | 12504     | 19.94           | 0.018321   | 0.003691  | 0.11829  |

|                  |                                                                                                                                                                                                        |    |       |          |                                                                                                                                                                                                                                                                                                                                                                                                                                |     |      |       |       |          |          |         |
|------------------|--------------------------------------------------------------------------------------------------------------------------------------------------------------------------------------------------------|----|-------|----------|--------------------------------------------------------------------------------------------------------------------------------------------------------------------------------------------------------------------------------------------------------------------------------------------------------------------------------------------------------------------------------------------------------------------------------|-----|------|-------|-------|----------|----------|---------|
| SP_PIR_KEY WORDS | signal                                                                                                                                                                                                 | 62 | 23.48 | 1.05E-04 | LY9, LRRC15, AMN, C530028O21RIK, MMP2, CD93, DSEL, TREH, MUP11, GZMA, ERP29, DLL1, FGF21, CHRDL2, COL1A2, CD300LF, EGFL8, COL1A1, ADAM12, TREM2, CTSF, EMCN, HSD17B13, ADAMTS15, COL3A1, ELN, PF4, CX3CL1, SERPINH1, MFRP, AHSG, VCAM1, LY6A, SMOC2, C1QTNF6, C1QTNF4, GLIPR1, NUP210, COL6A1, GPNMB, DEFB1, LYZ2, COL4A2, LYZ1, SVEP1, NTF3, IL1RN, FBN1, NID1, SERPINA1E, SPARC, COL5A1, LAMP3, LEPRE1, HBEGF, GDF15, IGFBP2 | 232 | 2970 | 17854 | 1.607 | 0.028785 | 0.007275 | 0.13909 |
| SP_PIR_KEY WORDS | collagen                                                                                                                                                                                               | 8  | 3.03  | 1.08E-04 | COL4A2, C1QTNF6, COL3A1, COL1A2, COL6A1, COL1A1, COL5A1, MFRP                                                                                                                                                                                                                                                                                                                                                                  | 232 | 84   | 17854 | 7.329 | 0.029411 | 0.005953 | 0.14216 |
| UP_SEQ_FEATURE   | region of interest:Triple-helical region                                                                                                                                                               | 5  | 1.894 | 1.08E-04 | COL4A2, COL3A1, COL6A1, COL1A1, COL5A1                                                                                                                                                                                                                                                                                                                                                                                         | 231 | 18   | 16021 | 19.27 | 0.079572 | 0.04061  | 0.16489 |
| SP_PIR_KEY WORDS | hydroxylation                                                                                                                                                                                          | 7  | 2.652 | 1.76E-04 | COL4A2, ELN, COL3A1, COL1A2, COL6A1, COL1A1, COL5A1                                                                                                                                                                                                                                                                                                                                                                            | 232 | 64   | 17854 | 8.417 | 0.047631 | 0.008101 | 0.2323  |
| INTERPRO         | IPR001007: von Willebrand factor, type C                                                                                                                                                               | 6  | 2.273 | 1.81E-04 | CHRDL2, PXDN, COL3A1, FSTL1, COL1A1, AMN                                                                                                                                                                                                                                                                                                                                                                                       | 226 | 42   | 17763 | 11.23 | 0.084758 | 0.043317 | 0.25967 |
| GOTERM_CC_FAT    | GO:0044421~extracellular region part                                                                                                                                                                   | 24 | 9.091 | 1.90E-04 | COL4A2, TNF, LEPR, FBN1, ELN, ADAMTS15, IL1RN, COL3A1, NID1, PF4, CX3CL1, SPARC, MMP2, COL5A1, AHSG, SMOC2, LEPRE1, COL1A2, COL6A1, HBEGF, COL1A1, IGFBP2, GDF15,                                                                                                                                                                                                                                                              | 165 | 774  | 12504 | 2.35  | 0.036411 | 0.006163 | 0.23714 |
| GOTERM_MF_FAT    | GO:0016712~oxidoreductase activity, acting on paired donors, with incorporation or reduction of molecular oxygen, reduced flavin or flavoprotein as one donor, and incorporation of one atom of oxygen | 6  | 2.273 | 2.54E-04 | CYP2D9, CYP4A12A, CYP1A1, CYP3A11, CYP2C67, CYP2C40, CYP2B10                                                                                                                                                                                                                                                                                                                                                                   | 174 | 44   | 13288 | 10.41 | 0.084669 | 0.021875 | 0.34679 |
| SMART            | SM00214:VWC                                                                                                                                                                                            | 6  | 2.273 | 2.91E-04 | CHRDL2, PXDN, COL3A1, FSTL1, COL1A1, AMN                                                                                                                                                                                                                                                                                                                                                                                       | 130 | 42   | 9131  | 10.03 | 0.03492  | 0.03492  | 0.33489 |
| INTERPRO         | IPR000885: Fibrillar collagen, C-terminal                                                                                                                                                              | 4  | 1.515 | 3.07E-04 | COL3A1, COL1A2, COL1A1, COL5A1                                                                                                                                                                                                                                                                                                                                                                                                 | 226 | 11   | 17763 | 28.58 | 0.139402 | 0.048811 | 0.43975 |
| UP_SEQ_FEATURE   | domain:Fibrillar collagen NC1                                                                                                                                                                          | 4  | 1.515 | 3.25E-04 | COL3A1, COL1A2, COL1A1, COL5A1                                                                                                                                                                                                                                                                                                                                                                                                 | 231 | 10   | 16021 | 27.74 | 0.22084  | 0.079814 | 0.49541 |
| GOTERM_BP_FAT    | GO:0006259~DNA metabolic process                                                                                                                                                                       | 16 | 6.061 | 3.38E-04 | DNMT3A, FHIT, ING4, HMGB2, APEX2, NASP, EME1, POT1A, MCM6, RFC5, DCLRE1C, EPC2, RFC4, EEF1E1, TDG, DNMT3B                                                                                                                                                                                                                                                                                                                      | 175 | 421  | 13588 | 2.951 | 0.313056 | 0.313056 | 0.54013 |
| GOTERM_MF_FAT    | GO:0019838~growth factor binding                                                                                                                                                                       | 7  | 2.652 | 3.43E-04 | NTF3, COL3A1, COL1A2, COL6A1, COL1A1, IGFBP2, COL5A1                                                                                                                                                                                                                                                                                                                                                                           | 174 | 72   | 13288 | 7.425 | 0.112438 | 0.023573 | 0.46728 |

|                  |                                                      |    |       |          |                                                                                                                                                                                                                                                                                                                                                                                                                                |     |      |       |       |          |          |         |
|------------------|------------------------------------------------------|----|-------|----------|--------------------------------------------------------------------------------------------------------------------------------------------------------------------------------------------------------------------------------------------------------------------------------------------------------------------------------------------------------------------------------------------------------------------------------|-----|------|-------|-------|----------|----------|---------|
| SMART            | SM00038:COLFI                                        | 4  | 1.515 | 4.18E-04 | COL3A1, COL1A2, COL1A1, COL5A1                                                                                                                                                                                                                                                                                                                                                                                                 | 130 | 11   | 9131  | 25.54 | 0.049775 | 0.025205 | 0.48068 |
| SP_PIR_KEY WORDS | collagen binding                                     | 3  | 1.136 | 9.83E-04 | NID1, SPARC, SERPINH1                                                                                                                                                                                                                                                                                                                                                                                                          | 232 | 4    | 17854 | 57.72 | 0.238486 | 0.038173 | 1.28995 |
| GOTERM_BP_FAT    | GO:0044036~cell wall macromolecule metabolic process | 4  | 1.515 | 0.001022 | LYZ2, LYZ1, LYSMD1, LYSMD4                                                                                                                                                                                                                                                                                                                                                                                                     | 175 | 16   | 13588 | 19.41 | 0.678683 | 0.433152 | 1.62418 |
| GOTERM_BP_FAT    | GO:0016998~cell wall macromolecule catabolic process | 4  | 1.515 | 0.001022 | LYZ2, LYZ1, LYSMD1, LYSMD4                                                                                                                                                                                                                                                                                                                                                                                                     | 175 | 16   | 13588 | 19.41 | 0.678683 | 0.433152 | 1.62418 |
| INTERPRO         | IPR006209:EGF                                        | 8  | 3.03  | 0.001233 | NRG4, SVEP1, CD93, FBN1, HBEGF, DLL1, NID1, EGFL8                                                                                                                                                                                                                                                                                                                                                                              | 226 | 128  | 17763 | 4.912 | 0.452973 | 0.139992 | 1.75537 |
| SP_PIR_KEY WORDS | disulfide bond                                       | 50 | 18.94 | 0.001305 | NRG4, SVEP1, CD93, FBN1, HBEGF, DLL1, NID1, EGFL8, CD300LF, EGFL8, TREM2, ADAM12, CTSF, TNF, ADAMTS15, ELN, COL3A1, PF4, CX3CL1, MFRP, AHSG, VCAM1, LY6A, SMOC2, ADRA2A, GALNT11, DEFB1, LYZ2, COL4A2, LYZ1, SVEP1, NTF3, FBN1, IL1RN, NID1, SPARC, TFRC, HBEGF, IGFBP2,                                                                                                                                                       | 232 | 2469 | 17854 | 1.558 | 0.303564 | 0.044215 | 1.70928 |
| INTERPRO         | IPR015369:Follistatin/Osteonectin-like EGF domain    | 3  | 1.136 | 0.001558 | FST, FSTL1, SPARC                                                                                                                                                                                                                                                                                                                                                                                                              | 226 | 5    | 17763 | 47.16 | 0.533411 | 0.141408 | 2.21301 |
| UP_SEQ_FEATURE   | signal peptide                                       | 62 | 23.48 | 0.001586 | LY9, LRRC15, AMN, C530028O21RIK, MMP2, CD93, DSEL, TREH, MUP11, GZMA, ERP29, DLL1, FGF21, CHRDL2, COL1A2, CD300LF, EGFL8, COL1A1, ADAM12, TREM2, CTSF, EMCN, HSD17B13, ADAMTS15, COL3A1, ELN, PF4, CX3CL1, SERPINH1, MFRP, AHSG, VCAM1, LY6A, SMOC2, C1QTNF6, C1QTNF4, GLIPR1, NUP210, COL6A1, GPNMB, DEFB1, LYZ2, COL4A2, LYZ1, SVEP1, NTF3, IL1RN, FBN1, NID1, SERPINA1E, SPARC, COL5A1, LAMP3, LEPRE1, HBEGF, GDF15, IGFBP2 | 231 | 2963 | 16021 | 1.451 | 0.704093 | 0.262454 | 2.39439 |
| GOTERM_BP_FAT    | GO:0030198~extracellular matrix organization         | 7  | 2.652 | 0.001878 | SMOC2, TNF, ELN, COL3A1, NID1, SERPINH1, COL5A1                                                                                                                                                                                                                                                                                                                                                                                | 175 | 101  | 13588 | 5.381 | 0.875935 | 0.501249 | 2.9652  |
| PIR_SUPERFAMILY  | PIRSF002255:collagen alpha 1(I) chain                | 3  | 1.136 | 0.001893 | COL3A1, COL1A2, COL1A1                                                                                                                                                                                                                                                                                                                                                                                                         | 115 | 5    | 8136  | 42.45 | 0.206418 | 0.206418 | 2.15828 |
| SP_PIR_KEY WORDS | microsome                                            | 7  | 2.652 | 0.001906 | CYP2D9, CYP4A12A, CYP1A1, CYP3A11, CYP2C67, FMO3, CYP2C40, CYP2B10                                                                                                                                                                                                                                                                                                                                                             | 232 | 100  | 17854 | 5.387 | 0.410415 | 0.057014 | 2.48635 |
| KEGG_PATHWAY     | mmu00830:Retinol metabolism                          | 6  | 2.273 | 0.002306 | CYP4A12A, CYP1A1, CYP3A11, CYP2C67, CYP2C40, ADH7, CYP2B10                                                                                                                                                                                                                                                                                                                                                                     | 80  | 68   | 5738  | 6.329 | 0.218874 | 0.218874 | 2.56161 |
| SP_PIR_KEY WORDS | Monooxygenase                                        | 7  | 2.652 | 0.002809 | CYP2D9, CYP4A12A, CYP1A1, CYP3A11, CYP2C67, FMO3, CYP2C40, CYP2B10                                                                                                                                                                                                                                                                                                                                                             | 232 | 108  | 17854 | 4.988 | 0.541241 | 0.074964 | 3.6453  |

|                     |                                                           |    |       |          |                                                                                                                                                                                                                                                                                                                                                                                                                                                                               |     |      |       |       |          |          |         |
|---------------------|-----------------------------------------------------------|----|-------|----------|-------------------------------------------------------------------------------------------------------------------------------------------------------------------------------------------------------------------------------------------------------------------------------------------------------------------------------------------------------------------------------------------------------------------------------------------------------------------------------|-----|------|-------|-------|----------|----------|---------|
| UP_SEQ_FE<br>ATURE  | propeptide:N-<br>terminal<br>propeptide                   | 3  | 1.136 | 0.002963 | COL3A1, COL1A2, COL1A1                                                                                                                                                                                                                                                                                                                                                                                                                                                        | 231 | 6    | 16021 | 34.68 | 0.897325 | 0.365703 | 4.42906 |
| UP_SEQ_FE<br>ATURE  | metal ion-<br>binding site:Iron<br>(heme axial<br>ligand) | 7  | 2.652 | 0.003029 | CYP2D9, PXDN, CYP4A12A,<br>CYP1A1, CYP3A11, CYP2C67,<br>CYP2C40, CYP2B10                                                                                                                                                                                                                                                                                                                                                                                                      | 231 | 99   | 16021 | 4.904 | 0.902385 | 0.321443 | 4.52513 |
| GOTERM_CC<br>FAT    | GO:0005583~fib<br>rillar collagen                         | 3  | 1.136 | 0.003439 | COL3A1, COL1A2, COL1A1                                                                                                                                                                                                                                                                                                                                                                                                                                                        | 165 | 7    | 12504 | 32.48 | 0.489156 | 0.091496 | 4.20838 |
| KEGG_PATH<br>WAY    | mmu00982:Drug<br>metabolism                               | 6  | 2.273 | 0.003543 | CYP2D9, CYP3A11, CYP2C67,<br>FMO3, CYP2C40, ADH7, CYP2B10                                                                                                                                                                                                                                                                                                                                                                                                                     | 80  | 75   | 5738  | 5.738 | 0.315984 | 0.172947 | 3.91107 |
| INTERPRO            | IPR017973:Cyto<br>chrome P450, C-<br>terminal region      | 6  | 2.273 | 0.003662 | CYP2D9, CYP4A12A, CYP1A1,<br>CYP3A11, CYP2C67, CYP2C40,<br>CYP2B10                                                                                                                                                                                                                                                                                                                                                                                                            | 226 | 81   | 17763 | 5.822 | 0.833678 | 0.258419 | 5.12981 |
| INTERPRO            | IPR000742:EGF-<br>like, type 3                            | 9  | 3.409 | 0.003923 | NRG4, SVEP1, CD93, FBN1,<br>HBEGF, DLL1, NID1, EGFL8,                                                                                                                                                                                                                                                                                                                                                                                                                         | 226 | 199  | 17763 | 3.555 | 0.853719 | 0.240127 | 5.48673 |
| GOTERM_BP<br>FAT    | GO:0060348~bo<br>ne development                           | 7  | 2.652 | 0.004089 | CHRD2, INSIG2, COL1A1,<br>GPNMB, WWTR1, MMP2, AHSG                                                                                                                                                                                                                                                                                                                                                                                                                            | 175 | 118  | 13588 | 4.606 | 0.98941  | 0.679206 | 6.34894 |
| UP_SEQ_FE<br>ATURE  | propeptide:C-<br>terminal<br>propeptide                   | 3  | 1.136 | 0.004109 | COL3A1, COL1A2, COL1A1                                                                                                                                                                                                                                                                                                                                                                                                                                                        | 231 | 7    | 16021 | 29.72 | 0.957506 | 0.363135 | 6.09242 |
| GOTERM_BP<br>FAT    | GO:0001568~bl<br>ood vessel<br>development                | 10 | 3.788 | 0.004211 | EMCN, HEY1, CXCR4, LEPR,<br>COL3A1, HBEGF, COL1A1,<br>CX3CL1, MMP2, COL5A1                                                                                                                                                                                                                                                                                                                                                                                                    | 175 | 244  | 13588 | 3.182 | 0.990761 | 0.608148 | 6.53318 |
| GOTERM_M<br>F_FAT   | GO:0008201~he<br>parin binding                            | 6  | 2.273 | 0.004524 | SMOC2, HBEGF, PF4, FSTL1,<br>GPNMB, COL5A1                                                                                                                                                                                                                                                                                                                                                                                                                                    | 174 | 83   | 13288 | 5.521 | 0.793597 | 0.231248 | 6.00808 |
| UP_SEQ_FE<br>ATURE  | short sequence<br>motif:Cell<br>attachment site           | 6  | 2.273 | 0.004719 | TFRC, COL6A1, NID1, COL1A1,<br>GPNMB, IGFBP2                                                                                                                                                                                                                                                                                                                                                                                                                                  | 231 | 76   | 16021 | 5.475 | 0.973429 | 0.364594 | 6.9659  |
| GOTERM_BP<br>FAT    | GO:0001944~va<br>sculature<br>development                 | 10 | 3.788 | 0.004943 | EMCN, HEY1, CXCR4, LEPR,<br>COL3A1, HBEGF, COL1A1,<br>CX3CL1, MMP2, COL5A1                                                                                                                                                                                                                                                                                                                                                                                                    | 175 | 250  | 13588 | 3.106 | 0.995916 | 0.6002   | 7.62728 |
| INTERPRO            | IPR001128:Cyto<br>chrome P450                             | 6  | 2.273 | 0.004969 | CYP2D9, CYP4A12A, CYP1A1,<br>CYP3A11, CYP2C67, CYP2C40,<br>CYP2B10                                                                                                                                                                                                                                                                                                                                                                                                            | 226 | 87   | 17763 | 5.421 | 0.912463 | 0.26248  | 6.90072 |
| SP_PIR_KEY<br>WORDS | electron<br>transfer                                      | 4  | 1.515 | 0.004972 | CYP2D9, CYP1A1, CYP3A11,<br>CYP2B10                                                                                                                                                                                                                                                                                                                                                                                                                                           | 232 | 27   | 17854 | 11.4  | 0.748607 | 0.117963 | 6.36807 |
| SP_PIR_KEY<br>WORDS | glycoprotein                                              | 64 | 24.24 | 0.005423 | B3GALT6, LEPR, FST, FSTL1, LY9,<br>LRRC15, AMN, MMP2, CD93,<br>CXCR4, DSEL, TREH, SLC43A2,<br>B3GALT, GZMA, DLL1, SAG,<br>CHRD2, COL1A2, EGFL8,<br>COL1A1, ADAM12, TREM2, CTSF,<br>EMCN, TNF, ADAMTS15,<br>COL3A1, PF4, SERPINH1, MFRP,<br>AHSG, VCAM1, LY6A, SMOC2,<br>C1QTNF6, NUP210, PTPLA,<br>ADRA2A, COL6A1, GALNT11,<br>GPNMB, LYSMD4, COL4A2,<br>SVEP1, NTF3, IL1RN, FBN1,<br>SLC10A6, NID1, SERPINA1E,<br>SPARC, CD63, LAMP3, LEPRE1,<br>TFRC, HBEGF, GDF15, IGFBP2, | 232 | 3600 | 17854 | 1.368 | 0.778253 | 0.11796  | 6.9263  |
| INTERPRO            | IPR017972:Cyto<br>chrome P450,<br>conserved site          | 6  | 2.273 | 0.005469 | CYP2D9, CYP4A12A, CYP1A1,<br>CYP3A11, CYP2C67, CYP2C40,<br>CYP2B10                                                                                                                                                                                                                                                                                                                                                                                                            | 226 | 89   | 17763 | 5.299 | 0.931567 | 0.257691 | 7.57119 |
| KEGG_PATH<br>WAY    | mmu04512:EC<br>M-receptor<br>interaction                  | 6  | 2.273 | 0.005473 | COL4A2, COL3A1, COL1A2,<br>COL6A1, COL1A1, COL5A1                                                                                                                                                                                                                                                                                                                                                                                                                             | 80  | 83   | 5738  | 5.185 | 0.444129 | 0.177774 | 5.98246 |

|                  |                                                                      |    |       |          |                                                                                                                                                                                                                                                                                                                   |     |      |       |       |          |          |         |
|------------------|----------------------------------------------------------------------|----|-------|----------|-------------------------------------------------------------------------------------------------------------------------------------------------------------------------------------------------------------------------------------------------------------------------------------------------------------------|-----|------|-------|-------|----------|----------|---------|
| GOTERM_BP_FAT    | GO:0033554~cellular response to stress                               | 13 | 4.924 | 0.005847 | ING4, PXDN, HMGB2, APEX2, TNF, EME1, DCLRE1C, EPC2, CDKN1A, EEF1E1, TDG, TRPV4, PHLDA3                                                                                                                                                                                                                            | 175 | 404  | 13588 | 2.499 | 0.998511 | 0.605426 | 8.96173 |
| SP_PIR_KEY_WORDS | metalloprotein                                                       | 5  | 1.894 | 0.005926 | CYP2D9, CYP1A1, CYP3A11, ADH7, CYP2B10                                                                                                                                                                                                                                                                            | 232 | 56   | 17854 | 6.871 | 0.807249 | 0.118952 | 7.54581 |
| INTERPRO         | IPR001881:EGF-like calcium-binding                                   | 6  | 2.273 | 0.006005 | SVEP1, CD93, FBN1, DLL1, NID1, EGFL8                                                                                                                                                                                                                                                                              | 226 | 91   | 17763 | 5.182 | 0.947413 | 0.255117 | 8.28309 |
| GOTERM_MF_FAT    | GO:0001871~pattern binding                                           | 7  | 2.652 | 0.006554 | SMOC2, FBN1, HBEGF, PF4, FSTL1, GPNMB, COL5A1                                                                                                                                                                                                                                                                     | 174 | 128  | 13288 | 4.176 | 0.898578 | 0.278861 | 8.59432 |
| GOTERM_MF_FAT    | GO:0030247~polysaccharide binding                                    | 7  | 2.652 | 0.006554 | SMOC2, FBN1, HBEGF, PF4, FSTL1, GPNMB, COL5A1                                                                                                                                                                                                                                                                     | 174 | 128  | 13288 | 4.176 | 0.898578 | 0.278861 | 8.59432 |
| INTERPRO         | IPR003645:Follistatin-like, N-terminal                               | 3  | 1.136 | 0.006723 | FST, FSTL1, SPARC                                                                                                                                                                                                                                                                                                 | 226 | 10   | 17763 | 23.58 | 0.963059 | 0.259076 | 9.22904 |
| INTERPRO         | IPR000152:EGF-type aspartate/asparagine hydroxylation conserved site | 6  | 2.273 | 0.006876 | SVEP1, CD93, FBN1, DLL1, NID1, EGFL8                                                                                                                                                                                                                                                                              | 226 | 94   | 17763 | 5.017 | 0.965745 | 0.245093 | 9.42998 |
| INTERPRO         | IPR018097:EGF-like calcium-binding, conserved site                   | 6  | 2.273 | 0.006876 | SVEP1, CD93, FBN1, DLL1, NID1, EGFL8                                                                                                                                                                                                                                                                              | 226 | 94   | 17763 | 5.017 | 0.965745 | 0.245093 | 9.42998 |
| SP_PIR_KEY_WORDS | cell binding                                                         | 3  | 1.136 | 0.007004 | COL4A2, COL6A1, NID1                                                                                                                                                                                                                                                                                              | 232 | 10   | 17854 | 23.09 | 0.857308 | 0.129838 | 8.86123 |
| GOTERM_BP_FAT    | GO:0030155~regulation of cell adhesion                               | 6  | 2.273 | 0.007134 | SMOC2, EMCN, PIK3CB, NID1, COL1A1, CYTH3                                                                                                                                                                                                                                                                          | 175 | 94   | 13588 | 4.956 | 0.999646 | 0.629702 | 10.8304 |
| UP_SEQ_FEATURE   | disulfide bond                                                       | 49 | 18.56 | 0.008207 | MIF2L1, PXDN, NRG4, COL1A1, LEPR, FST, FSTL1, LY9, MMP2, CD93, CXCR4, MUP11, GZMA, DLL1, SAG, CCR2, CD300LF, EGFL8, TREM2, ADAM12, CTSF, TNF, ADAMTS15, ELN, COL3A1, PF4, CX3CL1, MFRP, AHSG, VCAM1, LY6A, SMOC2, ADRA2A, GALNT11, DEFB1, LYZ2, COL4A2, SVEP1, LYZ1, NTF3, FBN1, IL1RN, NID1, SPARC, TFRC, HBEGF, | 231 | 2379 | 16021 | 1.428 | 0.998202 | 0.504574 | 11.8212 |
| SMART            | SM00274:FOLN                                                         | 3  | 1.136 | 0.008275 | FST, FSTL1, SPARC                                                                                                                                                                                                                                                                                                 | 130 | 10   | 9131  | 21.07 | 0.63715  | 0.286749 | 9.12392 |
| SP_PIR_KEY_WORDS | egf-like domain                                                      | 9  | 3.409 | 0.00845  | NRG4, SVEP1, CD93, FBN1, HBEGF, DLL1, NID1, EGFL8,                                                                                                                                                                                                                                                                | 232 | 222  | 17854 | 3.12  | 0.904695 | 0.14505  | 10.5975 |
| GOTERM_MF_FAT    | GO:0030246~carbohydrate binding                                      | 11 | 4.167 | 0.008612 | SMOC2, EMCN, CD93, FBN1, HBEGF, PF4, FSTL1, GPNMB, GALNT11, GPCPD1, COL5A1                                                                                                                                                                                                                                        | 174 | 317  | 13288 | 2.65  | 0.950712 | 0.313576 | 11.148  |
| UP_SEQ_FEATURE   | domain:EGF-like 5; calcium-binding                                   | 4  | 1.515 | 0.00891  | SVEP1, CD93, FBN1, NID1                                                                                                                                                                                                                                                                                           | 231 | 30   | 16021 | 9.247 | 0.998956 | 0.496627 | 12.7693 |
| SMART            | SM00179:EGF_CA                                                       | 6  | 2.273 | 0.009197 | SVEP1, CD93, FBN1, DLL1, NID1, EGFL8                                                                                                                                                                                                                                                                              | 130 | 91   | 9131  | 4.631 | 0.676086 | 0.24559  | 10.0923 |
| SP_PIR_KEY_WORDS | basement membrane                                                    | 4  | 1.515 | 0.00952  | SMOC2, COL4A2, NID1, SPARC                                                                                                                                                                                                                                                                                        | 232 | 34   | 17854 | 9.054 | 0.929329 | 0.152621 | 11.8625 |
| SP_PIR_KEY_WORDS | heme                                                                 | 7  | 2.652 | 0.010478 | CYP2D9, PXDN, CYP4A12A, CYP1A1, CYP3A11, CYP2C67, CYP2C40, CYP2B10                                                                                                                                                                                                                                                | 232 | 142  | 17854 | 3.794 | 0.945942 | 0.157709 | 12.9809 |
| COG_ONTOLOGY     | Secondary metabolites biosynthesis, transport, and catabolism        | 6  | 2.273 | 0.01061  | CYP2D9, CYP4A12A, CYP1A1, CYP3A11, CYP2C67, CYP2C40, CYP2B10                                                                                                                                                                                                                                                      | 27  | 109  | 2040  | 4.159 | 0.129479 | 0.129479 | 6.81827 |

|                     |                                                                    |    |       |          |                                                                            |     |     |       |       |          |          |         |
|---------------------|--------------------------------------------------------------------|----|-------|----------|----------------------------------------------------------------------------|-----|-----|-------|-------|----------|----------|---------|
| UP_SEQ_FE<br>ATURE  | domain:EGF-like<br>4; calcium-<br>binding                          | 4  | 1.515 | 0.010659 | SVEP1, CD93, FBN1, DLL1                                                    | 231 | 32  | 16021 | 8.669 | 0.999731 | 0.526307 | 15.0902 |
| GOTERM_M<br>F_FAT   | GO:0020037~he<br>me binding                                        | 7  | 2.652 | 0.011374 | CYP2D9, PXDN, CYP4A12A,<br>CYP1A1, CYP3A11, CYP2C67,<br>CYP2C40, CYP2B10   | 174 | 144 | 13288 | 3.712 | 0.981331 | 0.357456 | 14.4714 |
| INTERPRO            | IPR013091:EGF<br>calcium-binding                                   | 5  | 1.894 | 0.011404 | SVEP1, CD93, FBN1, NID1, EGFL8                                             | 226 | 69  | 17763 | 5.695 | 0.996334 | 0.350427 | 15.1812 |
| GOTERM_BP<br>_FAT   | GO:0001503~os<br>sification                                        | 6  | 2.273 | 0.011661 | CHRDL2, COL1A1, GPNMB,<br>WWTR1, MMP2, AHSG                                | 175 | 106 | 13588 | 4.395 | 0.999998 | 0.764635 | 17.1206 |
| GOTERM_BP<br>_FAT   | GO:0006974~re<br>sponse to DNA<br>damage<br>stimulus               | 10 | 3.788 | 0.011679 | DCLRE1C, ING4, CDKN1A, EPC2,<br>HMGB2, APEX2, EEF1E1, EME1,<br>TDG, PHLDA3 | 175 | 287 | 13588 | 2.705 | 0.999998 | 0.728551 | 17.1449 |
| INTERPRO            | IPR002401:Cyto<br>chrome P450, E-<br>class, group I                | 5  | 1.894 | 0.011978 | CYP2D9, CYP4A12A, CYP1A1,<br>CYP2C67, CYP2C40, CYP2B10                     | 226 | 70  | 17763 | 5.614 | 0.99724  | 0.343548 | 15.8853 |
| GOTERM_BP<br>_FAT   | GO:0043062~ex<br>tracellular<br>structure<br>organization          | 7  | 2.652 | 0.012309 | SMOC2, TNF, ELN, COL3A1,<br>NID1, SERPINH1, COL5A1                         | 175 | 149 | 13588 | 3.648 | 0.999999 | 0.713446 | 17.987  |
| KEGG_PATH<br>WAY    | mmu00980:Met<br>abolism of<br>xenobiotics by<br>cytochrome<br>P450 | 5  | 1.894 | 0.012582 | CYP1A1, CYP3A11, CYP2C67,<br>CYP2C40, ADH7, CYP2B10                        | 80  | 66  | 5738  | 5.434 | 0.742016 | 0.287314 | 13.2666 |
| GOTERM_BP<br>_FAT   | GO:0006260~D<br>NA replication                                     | 7  | 2.652 | 0.013476 | RFC5, FHIT, ING4, RFC4, NASP,<br>POT1A, MCM6                               | 175 | 152 | 13588 | 3.576 | 1        | 0.714919 | 19.524  |
| PIR_SUPERF<br>AMILY | PIRSF000045:cyt<br>ochrome P450<br>CYP2D6                          | 4  | 1.515 | 0.013672 | CYP2D9, CYP1A1, CYP2C67,<br>CYP2C40, CYP2B10                               | 115 | 36  | 8136  | 7.861 | 0.813522 | 0.568169 | 14.6574 |
| GOTERM_M<br>F_FAT   | GO:0046906~tet<br>rapyrrole<br>binding                             | 7  | 2.652 | 0.014144 | CYP2D9, PXDN, CYP4A12A,<br>CYP1A1, CYP3A11, CYP2C67,<br>CYP2C40, CYP2B10   | 174 | 151 | 13288 | 3.54  | 0.992969 | 0.390881 | 17.689  |
| GOTERM_BP<br>_FAT   | GO:0010810~re<br>gulation of cell-<br>substrate<br>adhesion        | 4  | 1.515 | 0.014412 | SMOC2, PIK3CB, NID1, COL1A1                                                | 175 | 40  | 13588 | 7.765 | 1        | 0.71048  | 20.7382 |
| GOTERM_BP<br>_FAT   | GO:0051258~pr<br>otein<br>polymerization                           | 4  | 1.515 | 0.014412 | TUBA8, TUBB2A, TUBD1, TES                                                  | 175 | 40  | 13588 | 7.765 | 1        | 0.71048  | 20.7382 |
| SP_PIR_KEY<br>WORDS | chromoprotein                                                      | 4  | 1.515 | 0.014854 | CYP2D9, CYP1A1, CYP3A11,<br>CYP2B10                                        | 232 | 40  | 17854 | 7.696 | 0.984165 | 0.205711 | 17.9265 |
| INTERPRO            | IPR008983:Tum<br>our necrosis<br>factor-like                       | 4  | 1.515 | 0.015008 | TNF, C1QTNF6, C1QTNF4, MFRP                                                | 226 | 41  | 17763 | 7.668 | 0.999385 | 0.389184 | 19.5129 |
| INTERPRO            | IPR006210:EGF-<br>like                                             | 8  | 3.03  | 0.015026 | NRG4, SVEP1, CD93, FBN1,<br>HBEGF, DLL1, NID1, EGFL8                       | 226 | 203 | 17763 | 3.097 | 0.999391 | 0.370423 | 19.534  |
| GOTERM_CC<br>_FAT   | GO:0005604~ba<br>sement<br>membrane                                | 5  | 1.894 | 0.015412 | SMOC2, COL4A2, NID1, SPARC,<br>COL5A1                                      | 165 | 73  | 12504 | 5.191 | 0.951622 | 0.315173 | 17.6234 |
| SP_PIR_KEY<br>WORDS | glycosidase                                                        | 5  | 1.894 | 0.015515 | LYZ2, LYZ1, TDG, TREH, NEU3                                                | 232 | 74  | 17854 | 5.2   | 0.98685  | 0.203849 | 18.65   |
| GOTERM_M<br>F_FAT   | GO:0005539~gly<br>cosaminoglycan<br>binding                        | 6  | 2.273 | 0.01661  | SMOC2, HBEGF, PF4, FSTL1,<br>GPNMB, COL5A1                                 | 174 | 114 | 13288 | 4.019 | 0.997059 | 0.411341 | 20.4585 |
| INTERPRO            | IPR000716:Thyr<br>oglobulin type-1                                 | 3  | 1.136 | 0.017054 | SMOC2, NID1, IGFBP2                                                        | 226 | 16  | 17763 | 14.74 | 0.999778 | 0.390305 | 21.8808 |
| INTERPRO            | IPR000886:Endo<br>plasmic<br>reticulum,<br>targeting<br>sequence   | 4  | 1.515 | 0.017058 | LEPRE1, ERP29, SERPINH1,<br>B3GALT1                                        | 226 | 43  | 17763 | 7.311 | 0.999778 | 0.373369 | 21.8845 |

|                  |                                                                        |    |       |          |                                                                    |     |     |       |       |          |          |         |
|------------------|------------------------------------------------------------------------|----|-------|----------|--------------------------------------------------------------------|-----|-----|-------|-------|----------|----------|---------|
| INTERPRO         | IPR013032:EGF-like region, conserved site                              | 10 | 3.788 | 0.017601 | NRG4, SVEP1, CD93, FBN1, HBEGF, DLL1, NID1, EGFL8, ADAM12, ZFP61   | 226 | 310 | 17763 | 2.535 | 0.999831 | 0.366837 | 22.502  |
| UP_SEQ_FEATURE   | domain:EGF-like 1                                                      | 6  | 2.273 | 0.018361 | SVEP1, CD93, FBN1, DLL1, NID1, EGFL8                               | 231 | 106 | 16021 | 3.926 | 0.999999 | 0.694102 | 24.6399 |
| GOTERM_BP_FAT    | GO:0045765~regulation of angiogenesis                                  | 4  | 1.515 | 0.019763 | COL4A2, PF4, CX3CL1, RUNX1                                         | 175 | 45  | 13588 | 6.902 | 1        | 0.794557 | 27.3535 |
| SMART            | SM00211:TY                                                             | 3  | 1.136 | 0.020881 | SMOC2, NID1, IGFBP2                                                | 130 | 16  | 9131  | 13.17 | 0.923802 | 0.40243  | 21.5696 |
| INTERPRO         | IPR002350:Proteinase inhibitor I1, Kazal                               | 4  | 1.515 | 0.022835 | SMOC2, FST, FSTL1, SPARC                                           | 226 | 48  | 17763 | 6.55  | 0.999988 | 0.431514 | 28.2225 |
| UP_SEQ_FEATURE   | glycosylation site:O-linked (GalNAc...)                                | 4  | 1.515 | 0.023645 | TFRC, HBEGF, PF4, NID1                                             | 231 | 43  | 16021 | 6.452 | 1        | 0.756304 | 30.6    |
| SMART            | SM00181:EGF                                                            | 8  | 3.03  | 0.024812 | NRG4, SVEP1, CD93, FBN1, HBEGF, DLL1, NID1, EGFL8                  | 130 | 203 | 9131  | 2.768 | 0.953356 | 0.400026 | 25.1195 |
| INTERPRO         | IPR009428:Beta-catenin-interacting ICAT                                | 2  | 0.758 | 0.025174 | CTNNBIP1, LZIC                                                     | 226 | 2   | 17763 | 78.6  | 0.999996 | 0.447717 | 30.6501 |
| GOTERM_BP_FAT    | GO:0060346~bone trabecula formation                                    | 2  | 0.758 | 0.025448 | COL1A1, MMP2                                                       | 175 | 2   | 13588 | 77.65 | 1        | 0.851551 | 33.8131 |
| SP_PIR_KEY_WORDS | laminin binding                                                        | 2  | 0.758 | 0.02571  | COL4A2, NID1                                                       | 232 | 2   | 17854 | 76.96 | 0.999264 | 0.302839 | 29.0943 |
| SP_PIR_KEY_WORDS | bacteriolytic enzyme                                                   | 2  | 0.758 | 0.02571  | LYZ2, LYZ1                                                         | 232 | 2   | 17854 | 76.96 | 0.999264 | 0.302839 | 29.0943 |
| GOTERM_CC_FAT    | GO:0005584~collagen type I                                             | 2  | 0.758 | 0.026061 | COL1A2, COL1A1                                                     | 165 | 2   | 12504 | 75.78 | 0.994196 | 0.43568  | 28.079  |
| INTERPRO         | IPR000217:Tubulin                                                      | 3  | 1.136 | 0.026124 | TUBA8, TUBB2A, TUBD1                                               | 226 | 20  | 17763 | 11.79 | 0.999998 | 0.444777 | 31.6143 |
| INTERPRO         | IPR003008:Tubulin/FtsZ, GTPase domain                                  | 3  | 1.136 | 0.026124 | TUBA8, TUBB2A, TUBD1                                               | 226 | 20  | 17763 | 11.79 | 0.999998 | 0.444777 | 31.6143 |
| PIR_SUPERFAMILY  | PIRSF038428:DNA (cytosine-5)-methyltransferase 3B, Dnmt3b type         | 2  | 0.758 | 0.027829 | DNMT3A, DNMT3B                                                     | 115 | 2   | 8136  | 70.75 | 0.96804  | 0.682652 | 27.7441 |
| GOTERM_CC_FAT    | GO:0005792~microsome region of interest:Nonhelical region (N-terminal) | 7  | 2.652 | 0.028453 | CYP2D9, CYP4A12A, CYP1A1, CYP3A11, CYP2C67, FMO3, CYP2C40, CYP2B10 | 165 | 176 | 12504 | 3.014 | 0.996407 | 0.430433 | 30.2533 |
| UP_SEQ_FEATURE   | region of interest:Nonhelical region (N-terminal)                      | 2  | 0.758 | 0.028507 | COL3A1, COL1A1                                                     | 231 | 2   | 16021 | 69.35 | 1        | 0.794945 | 35.692  |
| GOTERM_BP_FAT    | GO:0030199~collagen fibril organization                                | 3  | 1.136 | 0.02919  | COL3A1, SERPINH1, COL5A1                                           | 175 | 21  | 13588 | 11.09 | 1        | 0.871937 | 37.7673 |
| SMART            | SM00280:KAZAL                                                          | 4  | 1.515 | 0.030035 | SMOC2, FST, FSTL1, SPARC                                           | 130 | 48  | 9131  | 5.853 | 0.975775 | 0.412267 | 29.6093 |
| GOTERM_BP_FAT    | GO:0001501~skeletal system development                                 | 9  | 3.409 | 0.03044  | CHRDL2, INSIG2, HOXB8, COL1A1, RUNX1, GPNMB, WWTR1, MMP2, AHSG     | 175 | 285 | 13588 | 2.452 | 1        | 0.867134 | 39.0371 |
| SP_PIR_KEY_WORDS | heparin-binding                                                        | 4  | 1.515 | 0.031184 | HBEGF, PF4, FSTL1, COL5A1                                          | 232 | 53  | 17854 | 5.808 | 0.999846 | 0.341564 | 34.1771 |
| PIR_SUPERFAMILY  | PIRSF002306:tubulin                                                    | 3  | 1.136 | 0.031372 | TUBA8, TUBB2A, TUBD1                                               | 115 | 20  | 8136  | 10.61 | 0.979528 | 0.621741 | 30.7186 |
| GOTERM_CC_FAT    | GO:0042598~vesicular fraction                                          | 7  | 2.652 | 0.032767 | CYP2D9, CYP4A12A, CYP1A1, CYP3A11, CYP2C67, FMO3, CYP2C40, CYP2B10 | 165 | 182 | 12504 | 2.915 | 0.998491 | 0.446004 | 34.0219 |
| GOTERM_BP_FAT    | GO:0019835~cytolysis                                                   | 3  | 1.136 | 0.034588 | LYZ2, LYZ1, GZMA                                                   | 175 | 23  | 13588 | 10.13 | 1        | 0.885903 | 43.0818 |



|                 |                                                               |    |       |          |                                                                                                        |     |     |       |       |          |          |         |
|-----------------|---------------------------------------------------------------|----|-------|----------|--------------------------------------------------------------------------------------------------------|-----|-----|-------|-------|----------|----------|---------|
| GOTERM_BP_FAT   | GO:0019221~cytokine-mediated signaling pathway                | 4  | 1.515 | 0.034886 | TNF, CCR2, PF4, CX3CL1                                                                                 | 175 | 56  | 13588 | 5.546 | 1        | 0.874378 | 43.3622 |
| INTERPRO        | IPR017975:Tubulin, conserved site                             | 3  | 1.136 | 0.036719 | TUBA8, TUBB2A, TUBD1                                                                                   | 226 | 24  | 17763 | 9.825 | 1        | 0.548585 | 41.552  |
| INTERPRO        | IPR013748:Replication factor C                                | 2  | 0.758 | 0.037523 | RFC5, RFC4                                                                                             | 226 | 3   | 17763 | 52.4  | 1        | 0.541248 | 42.2487 |
| GOTERM_BP_FAT   | GO:0043045~DNA methylation during embryonic development       | 2  | 0.758 | 0.037929 | DNMT3A, DNMT3B                                                                                         | 175 | 3   | 13588 | 51.76 | 1        | 0.883052 | 46.1547 |
| SP_PIR_KEYWORDS | heterotrimer                                                  | 3  | 1.136 | 0.038164 | COL4A2, COL6A1, COL1A1                                                                                 | 232 | 24  | 17854 | 9.62  | 0.999979 | 0.387328 | 40.1687 |
| GOTERM_MF_FAT   | GO:0003886~DNA (cytosine-5-)-methyltransferase activity       | 2  | 0.758 | 0.038554 | DNMT3A, DNMT3B                                                                                         | 174 | 3   | 13288 | 50.91 | 0.999999 | 0.680245 | 41.5662 |
| GOTERM_MF_FAT   | GO:0009008~DNA-methyltransferase activity                     | 2  | 0.758 | 0.038554 | DNMT3A, DNMT3B                                                                                         | 174 | 3   | 13288 | 50.91 | 0.999999 | 0.680245 | 41.5662 |
| GOTERM_CC_FAT   | GO:0031982~vesicle                                            | 13 | 4.924 | 0.040507 | TNF, NTF3, NGP, IL1RN, ERP29, DLL1, WIP1, TFRC, CD93, SLC30A3, DOC2B, GPNMB, TES                       | 165 | 519 | 12504 | 1.898 | 0.999685 | 0.489281 | 40.3173 |
| GOTERM_BP_FAT   | GO:0048545~response to steroid hormone stimulus               | 4  | 1.515 | 0.041516 | HMGB2, LEPR, COL1A1, TES                                                                               | 175 | 60  | 13588 | 5.176 | 1        | 0.893678 | 49.2804 |
| GOTERM_MF_FAT   | GO:0050840~extracellular matrix binding                       | 3  | 1.136 | 0.041564 | ELN, NID1, SPARC                                                                                       | 174 | 25  | 13288 | 9.164 | 1        | 0.679037 | 44.0171 |
| UP_SEQ_FEATURE  | zinc finger region:ADD-type                                   | 2  | 0.758 | 0.042456 | DNMT3A, DNMT3B                                                                                         | 231 | 3   | 16021 | 46.24 | 1        | 0.89121  | 48.431  |
| UP_SEQ_FEATURE  | domain:Follistatin-like                                       | 2  | 0.758 | 0.042456 | FSTL1, SPARC                                                                                           | 231 | 3   | 16021 | 46.24 | 1        | 0.89121  | 48.431  |
| UP_SEQ_FEATURE  | region of interest:Interaction with the PRC2/EED-EZH2 complex | 2  | 0.758 | 0.042456 | DNMT3A, DNMT3B                                                                                         | 231 | 3   | 16021 | 46.24 | 1        | 0.89121  | 48.431  |
| GOTERM_CC_FAT   | GO:0019898~extrinsic to membrane                              | 12 | 4.545 | 0.046477 | CYP2D9, SVEP1, CYP1A1, CYP3A11, CYP2C67, CYP2C40, LANCL1, CYP2B10, CYP4A12A, CERK, NEU3, DOC2B, PHLDA3 | 165 | 472 | 12504 | 1.927 | 0.999907 | 0.510259 | 44.7909 |
| GOTERM_MF_FAT   | GO:0009055~electron carrier activity                          | 7  | 2.652 | 0.048687 | CYP2D9, CYB5R1, CYP4A12A, CYP1A1, CYP3A11, CYP2C67, CYP2C40, CYP2B10                                   | 174 | 202 | 13288 | 2.646 | 1        | 0.710814 | 49.4427 |
| UP_SEQ_FEATURE  | domain:EGF-like 7; calcium-binding                            | 3  | 1.136 | 0.049583 | SVEP1, FBN1, DLL1                                                                                      | 231 | 25  | 16021 | 8.323 | 1        | 0.912648 | 53.989  |
| GOTERM_BP_FAT   | GO:0042742~defensive response to bacterium                    | 5  | 1.894 | 0.049962 | LYZ2, TNF, LYZ1, NGP, DEFB1                                                                            | 175 | 108 | 13588 | 3.595 | 1        | 0.924674 | 55.9809 |
| GOTERM_BP_FAT   | GO:0032835~glomerulus development                             | 2  | 0.758 | 0.050252 | NID1, WWTR1                                                                                            | 175 | 4   | 13588 | 38.82 | 1        | 0.916944 | 56.1956 |

|                  |                                                             |    |       |          |                                                                                  |     |     |       |       |          |          |         |
|------------------|-------------------------------------------------------------|----|-------|----------|----------------------------------------------------------------------------------|-----|-----|-------|-------|----------|----------|---------|
| SP_PIR_KEY WORDS | stress-induced protein                                      | 2  | 0.758 | 0.050762 | HSPB1, SERPINH1                                                                  | 232 | 4   | 17854 | 38.48 | 0.999999 | 0.466026 | 49.7257 |
| SP_PIR_KEY WORDS | heat shock                                                  | 2  | 0.758 | 0.050762 | HSPB1, SERPINH1                                                                  | 232 | 4   | 17854 | 38.48 | 0.999999 | 0.466026 | 49.7257 |
| GOTERM_MF_FAT    | GO:0005547~phosphatidylinositol-3,4,5-trisphosphate binding | 2  | 0.758 | 0.051075 | CYTH3, PHLDA3                                                                    | 174 | 4   | 13288 | 38.18 | 1        | 0.703664 | 51.149  |
| GOTERM_MF_FAT    | GO:0033170~protein-DNA loading ATPase activity              | 2  | 0.758 | 0.051075 | RFC5, RFC4                                                                       | 174 | 4   | 13288 | 38.18 | 1        | 0.703664 | 51.149  |
| GOTERM_MF_FAT    | GO:0003689~DNA clamp loader activity                        | 2  | 0.758 | 0.051075 | RFC5, RFC4                                                                       | 174 | 4   | 13288 | 38.18 | 1        | 0.703664 | 51.149  |
| GOTERM_CC_FAT    | GO:0005663~DNA replication factor C complex                 | 2  | 0.758 | 0.051446 | RFC5, RFC4                                                                       | 165 | 4   | 12504 | 37.89 | 0.999966 | 0.520811 | 48.2765 |
| SP_PIR_KEY WORDS | transmembrane protein                                       | 10 | 3.788 | 0.051576 | CYP2D9, VCAM1, CYP4A12A, TFRC, CYP1A1, LEPR, CYP3A11, HBEGF, CYP2B10, CD63       | 232 | 370 | 17854 | 2.08  | 1        | 0.457285 | 50.2921 |
| INTERPRO         | IPR001073:Complement C1q protein                            | 3  | 1.136 | 0.051845 | C1QTNF6, C1QTNF4, MFRP                                                           | 226 | 29  | 17763 | 8.131 | 1        | 0.647014 | 53.4314 |
| UP_SEQ_FEATURE   | short sequence motif:Prevents secretion from ER             | 4  | 1.515 | 0.052804 | LEPRE1, ERP29, SERPINH1, B3GALT1                                                 | 231 | 59  | 16021 | 4.702 | 1        | 0.913499 | 56.313  |
| KEGG_PATHWAY     | mmu04510:Focal adhesion                                     | 7  | 2.652 | 0.054299 | COL4A2, PIK3CB, COL3A1, COL1A2, COL6A1, COL1A1, COL5A1                           | 80  | 198 | 5738  | 2.536 | 0.997455 | 0.697216 | 46.6101 |
| PIR_SUPERFAMILY  | PIRSF004274:phage T4 DNA polymerase accessory protein 44    | 2  | 0.758 | 0.05489  | RFC5, RFC4                                                                       | 115 | 4   | 8136  | 35.37 | 0.998979 | 0.747786 | 47.7951 |
| SP_PIR_KEY WORDS | iron                                                        | 9  | 3.409 | 0.057866 | CYP2D9, TET3, PXDN, CYP4A12A, LEPRE1, CYP1A1, CYP3A11, CYP2C67, CYP2C40, CYP2B10 | 232 | 321 | 17854 | 2.158 | 1        | 0.483386 | 54.4724 |
| GOTERM_BP_FAT    | GO:0009725~response to hormone stimulus                     | 6  | 2.273 | 0.060785 | HMGB2, LEPR, SERPINA1E, COL1A1, AHSG, TES                                        | 175 | 165 | 13588 | 2.823 | 1        | 0.944997 | 63.3584 |
| INTERPRO         | IPR001525:C-5 cytosine-specific DNA methylase               | 2  | 0.758 | 0.061756 | DNMT3A, DNMT3B                                                                   | 226 | 5   | 17763 | 31.44 | 1        | 0.698477 | 59.952  |
| GOTERM_BP_FAT    | GO:0051798~positive regulation of hair follicle development | 2  | 0.758 | 0.062417 | TNF, FST                                                                         | 175 | 5   | 13588 | 31.06 | 1        | 0.942822 | 64.3647 |
| GOTERM_BP_FAT    | GO:0006346~methylation-dependent chromatin silencing        | 2  | 0.758 | 0.062417 | DNMT3A, DNMT3B                                                                   | 175 | 5   | 13588 | 31.06 | 1        | 0.942822 | 64.3647 |
| GOTERM_BP_FAT    | GO:0001957~intramembranous ossification                     | 2  | 0.758 | 0.062417 | COL1A1, MMP2                                                                     | 175 | 5   | 13588 | 31.06 | 1        | 0.942822 | 64.3647 |
| SMART            | SM00110:C1Q                                                 | 3  | 1.136 | 0.062757 | C1QTNF6, C1QTNF4, MFRP                                                           | 130 | 29  | 9131  | 7.266 | 0.999632 | 0.627825 | 52.5849 |
| SP_PIR_KEY WORDS | trimer                                                      | 2  | 0.758 | 0.063046 | COL3A1, COL1A2                                                                   | 232 | 5   | 17854 | 30.78 | 1        | 0.50032  | 57.6677 |

|                     |                                                                     |    |       |          |                                                                                                                         |     |     |       |       |          |          |         |
|---------------------|---------------------------------------------------------------------|----|-------|----------|-------------------------------------------------------------------------------------------------------------------------|-----|-----|-------|-------|----------|----------|---------|
| SP_PIR_KEY<br>WORDS | polysaccharide<br>degradation                                       | 2  | 0.758 | 0.063046 | LY2Z, LY21                                                                                                              | 232 | 5   | 17854 | 30.78 | 1        | 0.50032  | 57.6677 |
| INTERPRO            | IPR018111:K<br>Homology, type<br>1, subgroup                        | 3  | 1.136 | 0.06526  | EIF4EBP3, KRR1, IGF2BP3                                                                                                 | 226 | 33  | 17763 | 7.145 | 1        | 0.705438 | 62.0463 |
| GOTERM_BP<br>_FAT   | GO:0006281~D<br>NA repair                                           | 7  | 2.652 | 0.066    | DCLRE1C, EPC2, HMGB2, APEX2,<br>EEF1E1, EME1, TDG                                                                       | 175 | 222 | 13588 | 2.448 | 1        | 0.945795 | 66.4834 |
| SP_PIR_KEY<br>WORDS | oxidoreductase                                                      | 13 | 4.924 | 0.068997 | CYP2D9, PXDN, CYB5R1, CYP1A1,<br>CYP3A11, HSD17B13, CYP2C67,<br>CYP2C40, ADH7, CYP2B10, TET3,<br>CYP4A12A, LEPRE1, FMO3 | 232 | 572 | 17854 | 1.749 | 1        | 0.519757 | 61.0827 |
| GOTERM_M<br>F_FAT   | GO:0005198~str<br>uctural<br>molecule<br>activity                   | 11 | 4.167 | 0.069782 | COL4A2, TUBA8, TUBB2A, KRT79,<br>FBN1, ELN, COL3A1, COL1A2,<br>TUBD1, COL1A1, COL5A1                                    | 174 | 450 | 13288 | 1.867 | 1        | 0.792643 | 62.786  |
| GOTERM_CC<br>_FAT   | GO:0031410~cy<br>toplasmic<br>vesicle                               | 12 | 4.545 | 0.070813 | TNF, TFRC, NGP, NTF3, CD93,<br>ERP29, DLL1, SLC30A3, GPNMB,<br>DOC2B, WIPI1, TES                                        | 165 | 508 | 12504 | 1.79  | 0.999999 | 0.615105 | 60.018  |
| SP_PIR_KEY<br>WORDS | sulfation                                                           | 3  | 1.136 | 0.071361 | CXCR4, NID1, COL5A1                                                                                                     | 232 | 34  | 17854 | 6.79  | 1        | 0.519255 | 62.367  |
| INTERPRO            | IPR002482:Pepti<br>doglycan-<br>binding Lysin<br>subgroup           | 2  | 0.758 | 0.073644 | LYSMD1, LYSMD4                                                                                                          | 226 | 6   | 17763 | 26.2  | 1        | 0.737096 | 66.651  |
| INTERPRO            | IPR018117:C-5<br>cytosine-specific<br>DNA methylase,<br>active site | 2  | 0.758 | 0.073644 | DNMT3A, DNMT3B                                                                                                          | 226 | 6   | 17763 | 26.2  | 1        | 0.737096 | 66.651  |
| INTERPRO            | IPR018392:Pepti<br>doglycan-<br>binding lysin<br>domain             | 2  | 0.758 | 0.073644 | LYSMD1, LYSMD4                                                                                                          | 226 | 6   | 17763 | 26.2  | 1        | 0.737096 | 66.651  |
| SP_PIR_KEY<br>WORDS | Cyclosporin                                                         | 2  | 0.758 | 0.075172 | PPID, PPIC                                                                                                              | 232 | 6   | 17854 | 25.65 | 1        | 0.525949 | 64.3554 |
| GOTERM_BP<br>_FAT   | GO:0008544~ep<br>idermis<br>development                             | 5  | 1.894 | 0.076764 | FOXQ1, NTF3, FST, COL1A1,<br>COL5A1                                                                                     | 175 | 125 | 13588 | 3.106 | 1        | 0.962506 | 72.1605 |
| GOTERM_M<br>F_FAT   | GO:0005506~iro<br>n ion binding                                     | 9  | 3.409 | 0.079764 | CYP2D9, TET3, PXDN, CYP4A12A,<br>LEPRE1, CYP1A1, CYP3A11,<br>CYP2C67, CYP2C40, CYP2B10                                  | 174 | 343 | 13288 | 2.004 | 1        | 0.817612 | 67.8873 |
| PIR_SUPERF<br>AMILY | PIRSF001064:lys<br>ozyme c                                          | 2  | 0.758 | 0.081204 | LY2Z, LY21                                                                                                              | 115 | 6   | 8136  | 23.58 | 0.999967 | 0.821303 | 62.2849 |
| SMART               | SM00257:LysM                                                        | 2  | 0.758 | 0.08185  | LYSMD1, LYSMD4                                                                                                          | 130 | 6   | 9131  | 23.41 | 0.99997  | 0.68575  | 62.5888 |
| SP_PIR_KEY<br>WORDS | growth factor                                                       | 5  | 1.894 | 0.082911 | NRG4, NTF3, HBEGF, FGF21,<br>GDF15                                                                                      | 232 | 127 | 17854 | 3.03  | 1        | 0.550288 | 68.0978 |
| UP_SEQ_FE<br>ATURE  | repeat:LysM                                                         | 2  | 0.758 | 0.083117 | LYSMD1, LYSMD4                                                                                                          | 231 | 6   | 16021 | 23.12 | 1        | 0.975216 | 73.4097 |
| KEGG_PATH<br>WAY    | mmu03030:DN<br>A replication                                        | 3  | 1.136 | 0.083192 | RFC5, RFC4, MCM6                                                                                                        | 80  | 35  | 5738  | 6.148 | 0.999908 | 0.787529 | 62.3307 |
| INTERPRO            | IPR004129:Glyc<br>erophosphoryl<br>diester<br>phosphodiester<br>ase | 2  | 0.758 | 0.085382 | GPCPD1, GDPD1                                                                                                           | 226 | 7   | 17763 | 22.46 | 1        | 0.777965 | 72.2297 |
| GOTERM_M<br>F_FAT   | GO:0003924~GT<br>Pase activity                                      | 5  | 1.894 | 0.086014 | TUBA8, TUBB2A, TUBD1, AGAP2,<br>ARL4A                                                                                   | 174 | 128 | 13288 | 2.983 | 1        | 0.824275 | 70.7426 |
| GOTERM_BP<br>_FAT   | GO:0051797~re<br>gulation of hair<br>follicle<br>development        | 2  | 0.758 | 0.086285 | TNF, FST                                                                                                                | 175 | 7   | 13588 | 22.18 | 1        | 0.972047 | 76.4177 |
| GOTERM_BP<br>_FAT   | GO:0045684~po<br>sitive regulation<br>of epidermis<br>development   | 2  | 0.758 | 0.086285 | TNF, FST                                                                                                                | 175 | 7   | 13588 | 22.18 | 1        | 0.972047 | 76.4177 |

|                  |                                                            |    |       |          |                                                                                                                                                                                                                                                                                                                                                                                                                                                                                                                                                                                                                                                    |     |      |       |       |   |          |         |
|------------------|------------------------------------------------------------|----|-------|----------|----------------------------------------------------------------------------------------------------------------------------------------------------------------------------------------------------------------------------------------------------------------------------------------------------------------------------------------------------------------------------------------------------------------------------------------------------------------------------------------------------------------------------------------------------------------------------------------------------------------------------------------------------|-----|------|-------|-------|---|----------|---------|
| GOTERM_BP_FAT    | GO:0042634~regulation of hair cycle                        | 2  | 0.758 | 0.086285 | TNF, FST                                                                                                                                                                                                                                                                                                                                                                                                                                                                                                                                                                                                                                           | 175 | 7    | 13588 | 22.18 | 1 | 0.972047 | 76.4177 |
| SP_PIR_KEY_WORDS | phosphoprotein                                             | 93 | 35.23 | 0.087076 | CYP2D9, FHIT, PXDN, MPZL1, 5730508B09RIK, TUBB2A, LEPR, MED23, GPCPD1, STK30, MMP2, EIF4EBP3, FAM83A, HEY1, CD93, CXCR4, TRPV4, FAM181B, AGAP2, FAM83G, SLC43A2, CCDC28B, KRR1, PURG, CYP1A1, ERP29, CCDC138, PIM2, CYP2B10, CDKL5, MCM6, DCLRE1C, TOMM20, HSPB1, RIN1, CD300LF, NEU3, ADAM12, THEM4, GADD45B, CTSF, ING4, HMGB2, TNF, DBNDD2, HSD17B13, SNX8, COL3A1, 2810021B07RIK, ANLN, IGF2BP3, 5830433M19RIK, TAGLN3, AHSG, LY6A, VCAM1, NCAPH, NPAS2, HSPA2, C1QTNF4, NUP210, FMO3, NUDT21, ADRA2A, SLC30A3, EIF3J, UCK2, GPNMB, RUNX1, LYSMD1, TES, AATK, DNMT3A, NASP, FBN1, EME1, TAF7, PHF10, SPARC, WWTR1, TAB3, E130012A19RIK, TUBA8, | 232 | 6311 | 17854 | 1.134 | 1 | 0.556937 | 69.9583 |
| INTERPRO         | IPR004087:K Homology                                       | 3  | 1.136 | 0.087237 | EIF4EBP3, KRR1, IGF2BP3                                                                                                                                                                                                                                                                                                                                                                                                                                                                                                                                                                                                                            | 226 | 39   | 17763 | 6.046 | 1 | 0.774141 | 73.0272 |
| INTERPRO         | IPR001818:Peptidase M10A and M12B, matrixin and adamalysin | 3  | 1.136 | 0.087237 | ADAMTS15, ADAM12, MMP2                                                                                                                                                                                                                                                                                                                                                                                                                                                                                                                                                                                                                             | 226 | 39   | 17763 | 6.046 | 1 | 0.774141 | 73.0272 |
| GOTERM_BP_FAT    | GO:0009719~response to endogenous stimulus                 | 6  | 2.273 | 0.087798 | HMGB2, LEPR, SERPINA1E, COL1A1, AHSG, TES                                                                                                                                                                                                                                                                                                                                                                                                                                                                                                                                                                                                          | 175 | 184  | 13588 | 2.532 | 1 | 0.970321 | 77.035  |
| UP_SEQ_FEATURE   | domain:EGF-like 3; calcium-binding                         | 3  | 1.136 | 0.089675 | SVEP1, CD93, NID1                                                                                                                                                                                                                                                                                                                                                                                                                                                                                                                                                                                                                                  | 231 | 35   | 16021 | 5.945 | 1 | 0.977467 | 76.1697 |
| SP_PIR_KEY_WORDS | notch signaling pathway                                    | 3  | 1.136 | 0.090437 | HEY1, APH1C, DLL1                                                                                                                                                                                                                                                                                                                                                                                                                                                                                                                                                                                                                                  | 232 | 39   | 17854 | 5.92  | 1 | 0.559804 | 71.3861 |
| GOTERM_BP_FAT    | GO:0007398~ectoderm development                            | 5  | 1.894 | 0.091435 | FOXQ1, NTF3, FST, COL1A1, COL5A1                                                                                                                                                                                                                                                                                                                                                                                                                                                                                                                                                                                                                   | 175 | 133  | 13588 | 2.919 | 1 | 0.971215 | 78.458  |
| GOTERM_BP_FAT    | GO:0001525~angiogenesis                                    | 5  | 1.894 | 0.091435 | EMCN, CXCR4, LEPR, HBEGF, CX3CL1                                                                                                                                                                                                                                                                                                                                                                                                                                                                                                                                                                                                                   | 175 | 133  | 13588 | 2.919 | 1 | 0.971215 | 78.458  |
| UP_SEQ_FEATURE   | domain:GDPD glycosylation site:O-linked (Gal...)           | 2  | 0.758 | 0.096284 | GPCPD1, GDPD1                                                                                                                                                                                                                                                                                                                                                                                                                                                                                                                                                                                                                                      | 231 | 7    | 16021 | 19.82 | 1 | 0.979402 | 78.6783 |
| UP_SEQ_FEATURE   | domain:GDPD glycosylation site:O-linked (Gal...)           | 2  | 0.758 | 0.096284 | COL3A1, COL1A1                                                                                                                                                                                                                                                                                                                                                                                                                                                                                                                                                                                                                                     | 231 | 7    | 16021 | 19.82 | 1 | 0.979402 | 78.6783 |
| INTERPRO         | IPR017878:TGF-beta binding                                 | 2  | 0.758 | 0.096972 | FBN1, FST                                                                                                                                                                                                                                                                                                                                                                                                                                                                                                                                                                                                                                          | 226 | 8    | 17763 | 19.65 | 1 | 0.799911 | 76.8754 |
| INTERPRO         | IPR000974:Glycoside hydrolase, family 22, lysozyme         | 2  | 0.758 | 0.096972 | LY22, LY21                                                                                                                                                                                                                                                                                                                                                                                                                                                                                                                                                                                                                                         | 226 | 8    | 17763 | 19.65 | 1 | 0.799911 | 76.8754 |

|                |                                                                           |   |       |          |                              |     |    |       |       |          |          |          |         |
|----------------|---------------------------------------------------------------------------|---|-------|----------|------------------------------|-----|----|-------|-------|----------|----------|----------|---------|
|                | IPR012461:Protein of unknown function                                     |   |       |          |                              |     |    |       |       |          |          |          |         |
| INTERPRO       | DUF1669                                                                   | 2 | 0.758 | 0.096972 | FAM83A, FAM83G               | 226 | 8  | 17763 | 19.65 |          | 1        | 0.799911 | 76.8754 |
| SP_PIR_KEY     | dna replication                                                           | 4 | 1.515 | 0.097909 | RFC5, RFC4, NASP, MCM6       | 232 | 85 | 17854 | 3.622 |          | 1        | 0.578909 | 74.338  |
|                | IPR006025:Peptidase M, neutral zinc metalloproteinases, zinc-binding site |   |       |          |                              |     |    |       |       |          |          |          |         |
| INTERPRO       |                                                                           | 4 | 1.515 | 0.098377 | AMZ1, ADAMTS15, ADAM12, MMP2 | 226 | 87 | 17763 | 3.614 |          | 1        | 0.794541 | 77.3865 |
|                | m_eea1Pathway: The role of FYVE-finger proteins in vesicle transport      |   |       |          |                              |     |    |       |       |          |          |          |         |
| BIOCARTA       |                                                                           | 2 | 0.758 | 0.098401 | TFRC, 4921523A10RIK          | 21  | 6  | 1171  | 18.59 | 0.996278 | 0.996278 | 63.7516  |         |
| UP_SEQ_FEATURE | domain:EGF-like 6                                                         | 3 | 1.136 | 0.098555 | FBN1, DLL1, NID1             | 231 | 37 | 16021 | 5.623 |          | 1        | 0.977395 | 79.4817 |
| SP_PIR_KEY     | sulfoprotein                                                              | 2 | 0.758 | 0.098957 | COL3A1, NID1                 | 232 | 8  | 17854 | 19.24 |          | 1        | 0.572132 | 74.7289 |
| SP_PIR_KEY     | blocked carboxyl end                                                      | 2 | 0.758 | 0.098957 | LY6A, VCAM1                  | 232 | 8  | 17854 | 19.24 |          | 1        | 0.572132 | 74.7289 |
|                | GO:0008889~glycerophosphodiesterase activity                              |   |       |          |                              |     |    |       |       |          |          |          |         |
| GOTERM_MF_FAT  |                                                                           | 2 | 0.758 | 0.099555 | GPCPD1, GDPD1                | 174 | 8  | 13288 | 19.09 |          | 1        | 0.853496 | 76.141  |

Supplementary Table 5.

© 2000-2015 QIAGEN. All rights reserved.

| Ingenuity Canonical Pathways                             | -log(p-value) | Ratio    | Overlap | Molecules                                                         |
|----------------------------------------------------------|---------------|----------|---------|-------------------------------------------------------------------|
| Atherosclerosis Signaling                                | 5.98E00       | 8.06E-02 | 10/124  | COL1A2,COL1A1,LYZ,VCAM1,CXCR4,IL1RN,SERPINA1,CCR2,TNF,CO<br>L3A1  |
| Estrogen Biosynthesis                                    | 4.32E00       | 1.35E-01 | 5/37    | CYP1A1,HSD17B13,Cyp2c40 (includes others),CYP3A5,CYP2B6           |
| Nicotine Degradation II                                  | 4.2E00        | 9.52E-02 | 6/63    | FMO3,ADH7,CYP1A1,Cyp2c40 (includes others),CYP3A5,CYP2B6          |
| Hepatic Fibrosis / Hepatic Stellate Cell Activation      | 4.19E00       | 5.05E-02 | 10/198  | COL5A1,COL1A2,COL1A1,VCAM1,COL6A1,LEPR,MMP2,COL4A2,TNF,<br>COL3A1 |
| Bupropion Degradation                                    | 3.84E00       | 1.6E-01  | 4/25    | CYP1A1,Cyp2c40 (includes others),CYP3A5,CYP2B6                    |
| Acetone Degradation I (to Methylglyoxal)                 | 3.77E00       | 1.54E-01 | 4/26    | CYP1A1,Cyp2c40 (includes others),CYP3A5,CYP2B6                    |
| Nicotine Degradation III                                 | 3.53E00       | 9.26E-02 | 5/54    | ADH7,CYP1A1,Cyp2c40 (includes others),CYP3A5,CYP2B6               |
| Melatonin Degradation I                                  | 3.42E00       | 8.77E-02 | 5/57    | CYP1A1,Cyp2c40 (includes others),CYP3A5,CYP2B6,Sult1d1            |
| Superpathway of Melatonin Degradation                    | 3.25E00       | 8.06E-02 | 5/62    | CYP1A1,Cyp2c40 (includes others),CYP3A5,CYP2B6,Sult1d1            |
| Granulocyte Adhesion and Diapedesis                      | 3.14E00       | 4.52E-02 | 8/177   | VCAM1,CXCR4,IL1RN,PF4,MMP2,CX3CL1,TNF,HSPB1                       |
| Dendritic Cell Maturation                                | 3.11E00       | 4.47E-02 | 8/179   | COL1A2,COL1A1,IL1RN,LEPR,TREM2,PIK3CB,TNF,COL3A1                  |
| Granzyme A Signaling                                     | 2.9E00        | 1.5E-01  | 3/20    | GZMA,H1FX,HMGB2                                                   |
| Role of BRCA1 in DNA Damage Response                     | 2.79E00       | 6.41E-02 | 5/78    | RFC4,CDKN1A,PLK1,RFC5,PHF10                                       |
| Hereditary Breast Cancer Signaling                       | 2.54E00       | 4.65E-02 | 6/129   | GADD45B,RFC4,CDKN1A,PIK3CB,RFC5,PHF10                             |
| Role of CHK Proteins in Cell Cycle Checkpoint            | 2.52E00       | 7.27E-02 | 4/55    | RFC4,CDKN1A,PLK1,RFC5                                             |
| Airway Pathology in Chronic Obstructive Pulmonary        | 2.5E00        | 2.5E-01  | 2/8     | MMP2,TNF                                                          |
| Intrinsic Prothrombin Activation Pathway                 | 2.42E00       | 1.03E-01 | 3/29    | COL1A2,COL1A1,COL3A1                                              |
| Agranulocyte Adhesion and Diapedesis                     | 2.33E00       | 3.7E-02  | 7/189   | VCAM1,CXCR4,IL1RN,PF4,MMP2,CX3CL1,TNF                             |
| IL-6 Signaling                                           | 2.06E00       | 4.31E-02 | 5/116   | COL1A1,IL1RN,PIK3CB,TNF,HSPB1                                     |
| LPS/IL-1 Mediated Inhibition of RXR Function             | 1.99E00       | 3.2E-02  | 7/219   | FMO3,IL1RN,CYP3A5,FABP7,CYP2B6,Sult1d1,TNF                        |
| LXR/RXR Activation                                       | 1.98E00       | 4.13E-02 |         | LYZ,IL1RN,AHSG,SERPINA1,TNF                                       |
| Glucocorticoid Receptor Signaling                        | 1.97E00       | 2.91E-02 |         | VCAM1,IL1RN,CDKN1A,PIK3CB,TAF7,TNF,HSPA2,PHF10                    |
| Mismatch Repair in MSP-RON Signaling                     | 1.89E00       | 1.25E-01 |         | RFC4,RFC5                                                         |
| Bladder Cancer Signaling                                 | 1.86E00       | 6.52E-02 |         | PIK3CB,CCR2,TNF                                                   |
| GADD45 Signaling                                         | 1.82E00       | 4.6E-02  |         | FGF21,CDKN1A,MMP2,RASSF1                                          |
| DNA Methylation and Transcriptional Repression Signaling | 1.75E00       | 1.05E-01 |         | GADD45B,CDKN1A                                                    |
| Taurine Biosynthesis                                     | 1.71E00       | 1E-01    |         | DNMT3B,DNMT3A                                                     |
| Dermatan Sulfate                                         | 1.66E00       | 5E-01    |         | CSAD                                                              |
| Xenobiotic Metabolism Signaling                          | 1.62E00       | 5.26E-02 |         | B3GALT6,DSEL,Sult1d1                                              |
| Trehalose Degradation II (Trehalase)                     | 1.54E00       | 2.58E-02 |         | FMO3,CYP1A1,CYP3A5,PIK3CB,CYP2B6,Sult1d1,TNF                      |
| L-serine Degradation                                     | 1.49E00       | 3.33E-01 |         | TREH                                                              |
| Non-Small Cell Lung Cancer Signaling                     | 1.49E00       | 3.33E-01 |         | SDSL                                                              |
| IL-15 Signaling                                          | 1.47E00       | 4.62E-02 |         | FHIT,PIK3CB,RASSF1                                                |
| PXR/RXR Activation                                       | 1.45E00       | 4.55E-02 |         | VCAM1,PIK3CB,TNF                                                  |
| Acute Phase Response Signaling                           | 1.44E00       | 4.48E-02 |         | CYP3A5,CYP2B6,TNF                                                 |
| 14-3-3-mediated Signaling                                | 1.42E00       | 2.96E-02 |         | IL1RN,AHSG,SERPINA1,PIK3CB,TNF                                    |
| Airway Inflammation in PI3K/AKT Signaling                | 1.41E00       | 3.42E-02 |         | TUBA8,TUBB2A,PIK3CB,TNF                                           |
|                                                          | 1.37E00       | 2.5E-01  |         | TNF                                                               |
|                                                          | 1.34E00       | 3.25E-02 |         | GDF15,CDKN1A,PIK3CB,THEM4                                         |

|                                                                          |          |          |                                |
|--------------------------------------------------------------------------|----------|----------|--------------------------------|
| HER-2 Signaling in Breast Cancer                                         | 1.3E00   | 3.95E-02 | CDKN1A,MMP2,PIK3CB             |
| FXR/RXR Activation                                                       | 1.3E00   | 3.15E-02 | IL1RN,AHSG,SERPINA1,TNF        |
| Acute Myeloid Leukemia Signaling                                         | 1.29E00  | 3.9E-02  | RUNX1,PIK3CB,PIM2              |
| Clathrin-mediated Endocytosis Signaling                                  | 1.28E00  | 2.7E-02  | FGF21,LYZ,TFRC,SERPINA1,PIK3CB |
| IL-9 Signaling                                                           | 1.28E00  | 5.88E-02 | PIK3CB,TNF                     |
| CMP-N-acetylneuraminate Biosynthesis I (Eukaryotes)                      | 1.27E00  | 2E-01    | NANP                           |
| Ceramide Signaling                                                       | 1.25E00  | 3.75E-02 | PIK3CB,CERK,TNF                |
| IL-12 Signaling and Production in Macrophages                            | 1.22E00  | 2.96E-02 | LYZ,SERPINA1,PIK3CB,TNF        |
| UDP-N-acetyl-D-glucosamine Biosynthesis II                               | 1.2E00   | 1.67E-01 | FMO3                           |
| Notch Signaling                                                          | 1.19E00  | 5.26E-02 | DLL1,HEY1                      |
| Aryl Hydrocarbon Receptor Signaling                                      | 1.18E00  | 2.86E-02 | CYP1A1,CDKN1A,TNF,HSPB1        |
| Inhibition of Matrix Metalloproteases                                    | 1.17E00  | 5.13E-02 | ADAM12,MMP2                    |
| ErbB Signaling                                                           | 1.17E00  | 3.49E-02 | NRG4,HBEGF,PIK3CB              |
| Glycoaminoglycan-protein Linkage Region                                  | 1.13E00  | 1.43E-01 | B3GALT6                        |
| Melanoma Signaling                                                       | 1.12E00  | 4.76E-02 | CDKN1A,PIK3CB                  |
| Death Receptor Signaling                                                 | 1.1E00   | 3.26E-02 | PARP16,TNF,HSPB1               |
| Dermatan Sulfate Biosynthesis (Late Stages)                              | 1.08E00  | 4.55E-02 | DSEL,Sult1d1                   |
| Role of Hypercytokinemia/hyperchemokine in the Pathogenesis of Influenza | 1.07E00  | 4.44E-02 | IL1RN,TNF                      |
| p53 Signaling                                                            | 1.04E00  | 3.06E-02 | GADD45B,CDKN1A,PIK3CB          |
| Telomerase Signaling                                                     | 1.03E00  | 3.03E-02 | CDKN1A,PIK3CB,POT1             |
| Graft-versus-Host Disease Signaling                                      | 1.02E00  | 4.17E-02 | IL1RN,TNF                      |
| Germ Cell-Sertoli Cell Junction Signaling                                | 1.01E00  | 2.5E-02  | TUBA8,TUBB2A,PIK3CB,TNF        |
| Cell Cycle: G2/M DNA Damage Checkpoint                                   | 1E00     | 4.08E-02 | CDKN1A,PLK1                    |
| Glycine Betaine                                                          | 9.85E-01 | 1E-01    | SDSL                           |
| Pancreatic Adenocarcinoma Signaling                                      | 9.63E-01 | 2.83E-02 | CDKN1A,HBEGF,PIK3CB            |
| Lymphotoxin $\beta$ Receptor Signaling                                   | 9.33E-01 | 3.7E-02  | VCAM1,PIK3CB                   |
| Chondroitin Sulfate Biosynthesis                                         | 9.33E-01 | 3.7E-02  | B3GALT6,Sult1d1                |
| NF- $\kappa$ B Signaling                                                 | 9.2E-01  | 2.31E-02 | IL1RN,PIK3CB,TNF,TAB3          |
| Cleavage and Polyadenylation of Pre-Acyl-CoA Hydrolysis                  | 9.1E-01  | 8.33E-02 | NUDT21                         |
| Role of Cytokines in Mediating Communication between Immune Cells        | 9.07E-01 | 3.57E-02 | IL1RN,TNF                      |
| Glioma Invasiveness                                                      | 8.94E-01 | 3.51E-02 | MMP2,PIK3CB                    |
| ErbB2-ErbB3 Signaling                                                    | 8.94E-01 | 3.51E-02 | NRG4,PIK3CB                    |
| Heparan Sulfate                                                          | 8.94E-01 | 3.51E-02 | B3GALT6,Sult1d1                |
| Production of Nitric Oxide and Reactive Oxygen Species in Macrophages    | 8.75E-01 | 2.22E-02 | LYZ,SERPINA1,PIK3CB,TNF        |
| ATM Signaling                                                            | 8.7E-01  | 3.39E-02 | GADD45B,CDKN1A                 |
| p38 MAPK Signaling                                                       | 8.69E-01 | 2.56E-02 | IL1RN,TNF,HSPB1                |
| PTEN Signaling                                                           | 8.61E-01 | 2.54E-02 | CDKN1A,PREX2,PIK3CB            |
| Induction of Apoptosis by ErbB4 Signaling                                | 8.58E-01 | 3.33E-02 | CXCR4,TNF                      |
| IL-8 Signaling                                                           | 8.5E-01  | 2.17E-02 | VCAM1,HBEGF,MMP2,PIK3CB        |

|                                                                                                       |          |          |  |                                            |
|-------------------------------------------------------------------------------------------------------|----------|----------|--|--------------------------------------------|
| DNA Double-Strand Break Repair by Non-Homologous End Joining                                          | 8.48E-01 | 7.14E-02 |  | DCLRE1C                                    |
| HMGB1 Signaling                                                                                       | 8.46E-01 | 2.5E-02  |  | VCAM1,PIK3CB,TNF                           |
| Estrogen-Dependent Breast Cancer Signaling                                                            | 8.35E-01 | 3.23E-02 |  | HSD17B13,PIK3CB                            |
| GM-CSF Signaling                                                                                      | 8.35E-01 | 3.23E-02 |  | RUNX1,PIK3CB                               |
| Antiproliferative Role of Somatostatin Receptor 2                                                     | 8.24E-01 | 3.17E-02 |  | CDKN1A,PIK3CB                              |
| Telomere Extension by Telomerase                                                                      | 8.2E-01  | 6.67E-02 |  | POT1                                       |
| RAR Activation                                                                                        | 8.15E-01 | 2.11E-02 |  | ADH7,PNRC1,PIK3CB,PHF10                    |
| Serotonin Degradation                                                                                 | 8.13E-01 | 3.12E-02 |  | ADH7,Sult1d1                               |
| Breast Cancer Regulation by Stathmin1                                                                 | 8.09E-01 | 2.09E-02 |  | TUBA8,CDKN1A,TUBB2A,PIK3CB                 |
| Role of Pattern Recognition Receptors in Recognition of Bacteria and Viruses                          | 7.94E-01 | 2.36E-02 |  | CASP1,PIK3CB,TNF                           |
| Neurotrophin/TRK Signaling                                                                            | 7.82E-01 | 2.99E-02 |  | NTF3,PIK3CB                                |
| IL-10 Signaling                                                                                       | 7.72E-01 | 2.94E-02 |  | IL1RN,TNF                                  |
| Remodeling of Epithelial Adherens Junctions                                                           | 7.72E-01 | 2.94E-02 |  | TUBA8,TUBB2A                               |
| Leukocyte Extravasation Signaling                                                                     | 7.7E-01  | 2.02E-02 |  | VCAM1,CXCR4,MMP2,PIK3CB                    |
| Agrin Interactions at Neuromuscular Junction                                                          | 7.62E-01 | 2.9E-02  |  | GABPB1,NRG4                                |
| Differential Regulation of Cytokine Production in Macrophages and T Helper Cells by IL-17A and IL-17F | 7.48E-01 | 5.56E-02 |  | TNF                                        |
| Small Cell Lung Cancer Signaling                                                                      | 7.43E-01 | 2.82E-02 |  | FHIT,PIK3CB                                |
| JAK/Stat Signaling                                                                                    | 7.34E-01 | 2.78E-02 |  | CDKN1A,PIK3CB                              |
| Leptin Signaling in Obesity                                                                           | 7.16E-01 | 2.7E-02  |  | LEPR,PIK3CB                                |
| Toll-like Receptor Signaling                                                                          | 7.16E-01 | 2.7E-02  |  | IL1RN,TNF                                  |
| Axonal Guidance Signaling                                                                             | 7.13E-01 | 1.62E-02 |  | NTF3,TUBA8,ADAM12,CXCR4,TUBB2A,MMP2,PIK3CB |
| TREM1 Signaling                                                                                       | 7.07E-01 | 2.67E-02 |  | CASP1,TNF                                  |
| Epithelial Adherens Junction Signaling                                                                | 6.73E-01 | 2.05E-02 |  | DLL1,TUBA8,TUBB2A                          |
| Role of Osteoblasts, Osteoclasts and Chondrocytes in                                                  | 6.65E-01 | 1.83E-02 |  | COL1A1,IL1RN,PIK3CB,TNF                    |
| AMPK Signaling                                                                                        | 6.61E-01 | 2.03E-02 |  | ADRA2A,PIK3CB,PHF10                        |
| Systemic Lupus Erythematosus Signaling                                                                | 6.61E-01 | 1.82E-02 |  | IL1RN,PIK3CB,TNF,PIM2                      |
| Differential Regulation of Cytokine Production in Intestinal Epithelial Cells by IL-17A and IL-17F    | 6.53E-01 | 4.35E-02 |  | TNF                                        |
| Prostate Cancer Signaling                                                                             | 6.49E-01 | 2.44E-02 |  | CDKN1A,PIK3CB                              |
| Aldosterone Signaling in Epithelial Cells                                                             | 6.39E-01 | 1.97E-02 |  | PIK3CB,HSPA2,HSPB1                         |
| Estrogen-mediated S-phase Entry                                                                       | 6.36E-01 | 4.17E-02 |  | CDKN1A                                     |
| Dopamine Degradation                                                                                  | 6.36E-01 | 4.17E-02 |  | Sult1d1                                    |
| FGF Signaling                                                                                         | 6.27E-01 | 2.35E-02 |  | FGF21,PIK3CB                               |
| Gap Junction Signaling                                                                                | 6.23E-01 | 1.94E-02 |  | TUBA8,TUBB2A,PIK3CB                        |
| IL-17A Signaling in Gastric Cells                                                                     | 6.21E-01 | 4E-02    |  | TNF                                        |
| HIPPO signaling                                                                                       | 6.19E-01 | 2.33E-02 |  | WWTR1,RASSF1                               |
| Neuregulin Signaling                                                                                  | 6.05E-01 | 2.27E-02 |  | NRG4,HBEGF                                 |
| Altered T Cell and B Cell Signaling in Rheumatoid Arthritis                                           | 6.05E-01 | 2.27E-02 |  | IL1RN,TNF                                  |
| UVA-Induced MAPK                                                                                      | 6.05E-01 | 2.27E-02 |  | PARP16,PIK3CB                              |
| Virus Entry via Endocytic Pathways                                                                    | 5.98E-01 | 2.25E-02 |  | TFRC,PIK3CB                                |



|                                                                      |          |          |  |                        |
|----------------------------------------------------------------------|----------|----------|--|------------------------|
| Crosstalk between Dendritic Cells and Natural Killer                 | 5.98E-01 | 2.25E-02 |  | TREM2,TNF              |
| PAK Signaling                                                        | 5.98E-01 | 2.25E-02 |  | PIK3CB,TNF             |
| Cell Cycle Control of Chromosomal Replication                        | 5.92E-01 | 3.7E-02  |  | MCM6                   |
| Communication between Innate and Adaptive                            | 5.84E-01 | 2.2E-02  |  | IL1RN,TNF              |
| Chronic Myeloid Leukemia Signaling                                   | 5.71E-01 | 2.15E-02 |  | CDKN1A,PIK3CB          |
| Salvage Pathways of Pyrimidine Ribonucleotides                       | 5.71E-01 | 2.15E-02 |  | PLK1,UCK2              |
| TNFR2 Signaling                                                      | 5.66E-01 | 3.45E-02 |  | TNF                    |
| PPAR Signaling                                                       | 5.65E-01 | 2.13E-02 |  | IL1RN,TNF              |
| Glioma Signaling                                                     | 5.58E-01 | 2.11E-02 |  | CDKN1A,PIK3CB          |
| Role of p14/p19ARF in Tumor Suppression                              | 5.53E-01 | 3.33E-02 |  | PIK3CB                 |
| IGF-1 Signaling                                                      | 5.46E-01 | 2.06E-02 |  | PIK3CB,IGFBP2          |
| Amyotrophic Lateral Sclerosis Signaling                              | 5.4E-01  | 2.04E-02 |  | CASP1,PIK3CB           |
| Cholecystokinin/Gastrin-mediated Signaling                           | 5.22E-01 | 1.98E-02 |  | IL1RN,TNF              |
| Retinoate Biosynthesis I                                             | 5.18E-01 | 3.03E-02 |  | ADH7                   |
| Ethanol Degradation II                                               | 5.18E-01 | 3.03E-02 |  | ADH7                   |
| HIF1 $\alpha$ Signaling                                              | 5.16E-01 | 1.96E-02 |  | MMP2,PIK3CB            |
| Sertoli Cell-Sertoli Cell Junction Signaling                         | 5.15E-01 | 1.69E-02 |  | TUBA8,TUBB2A,TNF       |
| HGF Signaling                                                        | 4.99E-01 | 1.9E-02  |  | CDKN1A,PIK3CB          |
| Coagulation System                                                   | 4.97E-01 | 2.86E-02 |  | SERPINA1               |
| Thyroid Hormone Metabolism II (via Conjugation and/or                | 4.97E-01 | 2.86E-02 |  | Sult1d1                |
| Stearate Biosynthesis I (Animals)                                    | 4.97E-01 | 2.86E-02 |  | THEM4                  |
| Noradrenaline and Adrenaline Degradation                             | 4.97E-01 | 2.86E-02 |  | ADH7                   |
| Regulation of the Epithelial-Mesenchymal Transition Pathway          | 4.9E-01  | 1.63E-02 |  | FGF21,MMP2,PIK3CB      |
| autophagy                                                            | 4.87E-01 | 2.78E-02 |  | WIP1                   |
| ERK/MAPK Signaling                                                   | 4.78E-01 | 1.6E-02  |  | LAMTOR3,PIK3CB,HSPB1   |
| Fc Epsilon RI Signaling                                              | 4.78E-01 | 1.83E-02 |  | PIK3CB,TNF             |
| Renin-Angiotensin                                                    | 4.78E-01 | 1.83E-02 |  | PIK3CB,TNF             |
| Sphingosine-1-phosphate Signaling                                    | 4.78E-01 | 1.83E-02 |  | CASP1,PIK3CB           |
| Role of Tissue Factor in Docosahexaenoic Acid (DHA) Signaling        | 4.73E-01 | 1.82E-02 |  | HBEGF,PIK3CB           |
| Role of PKR in Interferon Induction and Antiviral Response           | 4.5E-01  | 2.5E-02  |  | TNF                    |
| Thyroid Cancer Signaling                                             | 4.5E-01  | 2.5E-02  |  | NTF3                   |
| Fc $\gamma$ RIIB Signaling in B Lymphocytes                          | 4.42E-01 | 2.44E-02 |  | PIK3CB                 |
| Type II Diabetes Mellitus Signaling                                  | 4.39E-01 | 1.71E-02 |  | PIK3CB,TNF             |
| phagosome maturation                                                 | 4.25E-01 | 1.67E-02 |  | TUBA8,TUBB2A           |
| Chondroitin Sulfate Biosynthesis (Late Stages)                       | 4.03E-01 | 2.17E-02 |  | Sult1d1                |
| Adipogenesis pathway                                                 | 3.95E-01 | 1.57E-02 |  | CTNNBIP1,TNF           |
| Estrogen Receptor                                                    | 3.95E-01 | 1.57E-02 |  | MED23,TAF7             |
| Role of Macrophages, Fibroblasts and Endothelial Cells in Rheumatoid | 3.9E-01  | 1.34E-02 |  | VCAM1,IL1RN,PIK3CB,TNF |
| Ephrin A Signaling                                                   | 3.89E-01 | 2.08E-02 |  | PIK3CB                 |
| TNFR1 Signaling                                                      | 3.82E-01 | 2.04E-02 |  | TNF                    |
| Ovarian Cancer Signaling                                             | 3.79E-01 | 1.53E-02 |  | MMP2,PIK3CB            |

|                                                        |          |          |  |                       |
|--------------------------------------------------------|----------|----------|--|-----------------------|
| Assembly of RNA Polymerase II Complex                  | 3.75E-01 | 2E-02    |  | TAF7                  |
| Heparan Sulfate Biosynthesis (Late Stages)             | 3.75E-01 | 2E-02    |  | Sult1d1               |
| Human Embryonic Stem Cell Pluripotency                 | 3.67E-01 | 1.49E-02 |  | NTF3,PIK3CB           |
| CNTF Signaling                                         | 3.62E-01 | 1.92E-02 |  | PIK3CB                |
| Endometrial Cancer                                     | 3.62E-01 | 1.92E-02 |  | PIK3CB                |
| Primary Immunodeficiency Signaling                     | 3.62E-01 | 1.92E-02 |  | DCLRE1C               |
| Cardiac Hypertrophy                                    | 3.58E-01 | 1.35E-02 |  | ADRA2A,PIK3CB,HSPB1   |
| UVB-Induced MAPK                                       | 3.56E-01 | 1.89E-02 |  | PIK3CB                |
| IL-2 Signaling                                         | 3.56E-01 | 1.89E-02 |  | PIK3CB                |
| Phototransduction Pathway                              | 3.56E-01 | 1.89E-02 |  | SAG                   |
| Role of IL-17A in Arthritis                            | 3.5E-01  | 1.85E-02 |  | PIK3CB                |
| Unfolded protein response                              | 3.5E-01  | 1.85E-02 |  | HSPA2                 |
| Thrombopoietin Signaling                               | 3.44E-01 | 1.82E-02 |  | PIK3CB                |
| Huntington's Disease                                   | 3.39E-01 | 1.3E-02  |  | CASP1,PIK3CB,HSPA2    |
| EGF Signaling                                          | 3.39E-01 | 1.79E-02 |  | PIK3CB                |
| eNOS Signaling                                         | 3.39E-01 | 1.41E-02 |  | PIK3CB,HSPA2          |
| Myc Mediated Apoptosis Signaling                       | 3.28E-01 | 1.72E-02 |  | PIK3CB                |
| Regulation of eIF4 and p70S6K Signaling                | 3.25E-01 | 1.37E-02 |  | EIF4EBP3,PIK3CB       |
| Glioblastoma Multiforme Signaling                      | 3.25E-01 | 1.37E-02 |  | CDKN1A,PIK3CB         |
| Colorectal Cancer Metastasis Signaling                 | 3.23E-01 | 1.27E-02 |  | MMP2,PIK3CB,TNF       |
| CXCR4 Signaling                                        | 3.06E-01 | 1.32E-02 |  | CXCR4,PIK3CB          |
| Role of JAK1 and JAK3 in $\gamma$ c Cytokine Signaling | 3.02E-01 | 1.59E-02 |  | PIK3CB                |
| PCP pathway                                            | 3.02E-01 | 1.59E-02 |  | HSPB1                 |
| Activation of IRF by Cytosolic Pattern                 | 2.98E-01 | 1.56E-02 |  | TNF                   |
| Retinoic acid Mediated Apoptosis Signaling             | 2.98E-01 | 1.56E-02 |  | PARP16                |
| IL-17A Signaling in Airway                             | 2.98E-01 | 1.56E-02 |  | PIK3CB                |
| Pyridoxal 5'-phosphate Salvage Pathway                 | 2.98E-01 | 1.56E-02 |  | PLK1                  |
| Cell Cycle: G1/S Checkpoint Regulation                 | 2.98E-01 | 1.56E-02 |  | CDKN1A                |
| 3-phosphoinositide Biosynthesis                        | 2.94E-01 | 1.28E-02 |  | PIK3CB,STYXL1         |
| CD40 Signaling                                         | 2.93E-01 | 1.54E-02 |  | PIK3CB                |
| Tec Kinase Signaling                                   | 2.89E-01 | 1.27E-02 |  | PIK3CB,TNF            |
| Angiopoietin Signaling                                 | 2.88E-01 | 1.52E-02 |  | PIK3CB                |
| Mitotic Roles of Polo-Like Kinase                      | 2.88E-01 | 1.52E-02 |  | PLK1                  |
| Role of PI3K/AKT Signaling in the Pathogenesis of      | 2.88E-01 | 1.52E-02 |  | PIK3CB                |
| Erythropoietin Signaling                               | 2.84E-01 | 1.49E-02 |  | PIK3CB                |
| GDNF Family Ligand-Receptor Interactions               | 2.8E-01  | 1.47E-02 |  | PIK3CB                |
| Macropinocytosis Signaling                             | 2.8E-01  | 1.47E-02 |  | PIK3CB                |
| Hepatic Cholestasis                                    | 2.77E-01 | 1.23E-02 |  | IL1RN,TNF             |
| G-Protein Coupled Receptor Signaling                   | 2.77E-01 | 1.17E-02 |  | LAMTOR3,ADRA2A,PIK3CB |
| Growth Hormone Signaling                               | 2.75E-01 | 1.45E-02 |  | PIK3CB                |
| Role of MAPK Signaling in the Pathogenesis of          | 2.75E-01 | 1.45E-02 |  | TNF                   |
| IL-3 Signaling                                         | 2.67E-01 | 1.41E-02 |  | PIK3CB                |
| T Helper Cell Differentiation                          | 2.67E-01 | 1.41E-02 |  | TNF                   |
| Renal Cell Carcinoma                                   | 2.67E-01 | 1.41E-02 |  | PIK3CB                |
| PEDF Signaling                                         | 2.67E-01 | 1.41E-02 |  | PIK3CB                |
| Chemokine Signaling                                    | 2.67E-01 | 1.41E-02 |  | CXCR4                 |
| Tight Junction Signaling                               | 2.64E-01 | 1.2E-02  |  | NUDT21,TNF            |
| IL-17 Signaling                                        | 2.63E-01 | 1.39E-02 |  | PIK3CB                |

|                                                   |          |          |  |                                 |
|---------------------------------------------------|----------|----------|--|---------------------------------|
| LPS-stimulated MAPK Signaling                     | 2.59E-01 | 1.37E-02 |  | PIK3CB                          |
| NF- $\kappa$ B Activation by Viruses              | 2.59E-01 | 1.37E-02 |  | PIK3CB                          |
| Prolactin Signaling                               | 2.59E-01 | 1.37E-02 |  | PIK3CB                          |
| Ephrin B Signaling                                | 2.59E-01 | 1.37E-02 |  | CXCR4                           |
| STAT3 Pathway                                     | 2.59E-01 | 1.37E-02 |  | CDKN1A                          |
| FLT3 Signaling in Hematopoietic Progenitor        | 2.55E-01 | 1.35E-02 |  | PIK3CB                          |
| Endothelin-1 Signaling                            | 2.52E-01 | 1.16E-02 |  | CASP1,PIK3CB                    |
| Molecular Mechanisms of Cancer                    | 2.49E-01 | 1.1E-02  |  | LAMTOR3,CDKN1A,PIK3CB,Aph1c     |
| VEGF Family Ligand-Receptor Interactions          | 2.48E-01 | 1.32E-02 |  | PIK3CB                          |
| IL-4 Signaling                                    | 2.48E-01 | 1.32E-02 |  | PIK3CB                          |
| BMP signaling pathway                             | 2.48E-01 | 1.32E-02 |  | FST                             |
| PDGF Signaling                                    | 2.44E-01 | 1.3E-02  |  | PIK3CB                          |
| VDR/RXR Activation                                | 2.41E-01 | 1.28E-02 |  | CDKN1A                          |
| Cyclins and Cell Cycle Regulation                 | 2.41E-01 | 1.28E-02 |  | CDKN1A                          |
| Reelin Signaling in Neurons                       | 2.37E-01 | 1.27E-02 |  | PIK3CB                          |
| PPAR $\alpha$ /RXR $\alpha$ Activation            | 2.35E-01 | 1.12E-02 |  | MED23,Cyp2c40 (includes others) |
| NRF2-mediated Oxidative Stress Response           | 2.33E-01 | 1.11E-02 |  | ERP29,PIK3CB                    |
| Melanocyte Development and Pigmentation Signaling | 2.21E-01 | 1.19E-02 |  | PIK3CB                          |
| TR/RXR Activation                                 | 2.18E-01 | 1.18E-02 |  | PIK3CB                          |
| Allograft Rejection Signaling                     | 2.14E-01 | 1.16E-02 |  | TNF                             |
| $\alpha$ -Adrenergic Signaling                    | 2.11E-01 | 1.15E-02 |  | ADRA2A                          |
| FAK Signaling                                     | 2.11E-01 | 1.15E-02 |  | PIK3CB                          |
| TGF- $\beta$ Signaling                            | 2.11E-01 | 1.15E-02 |  | TGIF1                           |
| CTLA4 Signaling in Cytotoxic T Lymphocytes        | 2.08E-01 | 1.14E-02 |  | PIK3CB                          |
| G Beta Gamma Signaling                            | 2.08E-01 | 1.14E-02 |  | HBEGF                           |
| RANK Signaling in Apoptosis Signaling             | 2.08E-01 | 1.14E-02 |  | PIK3CB                          |
|                                                   | 2.06E-01 | 1.12E-02 |  | TNF                             |
